# Supplementary material
Source: MDPI journal article supplement (https://www.mdpi.com/2304-6740/10/10/158)
Supplement: s1 [file s1]

Archive with 4 entries (4 files):
- 4a.cif
- 5a.cif
- checkcif_4a.pdf
- checkcif_5a.pdf
