# Supplementary material
Source: MDPI journal article supplement (https://www.mdpi.com/2304-6740/10/10/158)
Supplement: s1 [file s1 › 4a.cif]

 
data_igrum 
  
_audit_creation_method            'SHELXL-2014/7' 
_shelx_SHELXL_version_number      '2014/7' 
_chemical_name_systematic         ? 
_chemical_name_common             ? 
_chemical_melting_point           ? 
_chemical_formula_moiety          ? 
_chemical_formula_sum 
 'C44 H45 B8 Cl O P2 Ru2' 
_chemical_formula_weight          975.81 
  
loop_ 
 _atom_type_symbol 
 _atom_type_description 
 _atom_type_scat_dispersion_real 
 _atom_type_scat_dispersion_imag 
 _atom_type_scat_source 
 'C'  'C'   0.0033   0.0016 
 'International Tables Vol C Tables 4.2.6.8 and 6.1.1.4' 
 'H'  'H'   0.0000   0.0000 
 'International Tables Vol C Tables 4.2.6.8 and 6.1.1.4' 
 'B'  'B'   0.0013   0.0007 
 'International Tables Vol C Tables 4.2.6.8 and 6.1.1.4' 
 'P'  'P'   0.1023   0.0942 
 'International Tables Vol C Tables 4.2.6.8 and 6.1.1.4' 
 'Cl'  'Cl'   0.1484   0.1585 
 'International Tables Vol C Tables 4.2.6.8 and 6.1.1.4' 
 'Ru'  'Ru'  -1.2594   0.8363 
 'International Tables Vol C Tables 4.2.6.8 and 6.1.1.4' 
 'O'  'O'   0.0106   0.0060 
 'International Tables Vol C Tables 4.2.6.8 and 6.1.1.4' 
  
_space_group_crystal_system       triclinic 
_space_group_IT_number            2 
_space_group_name_H-M_alt         'P -1' 
_space_group_name_Hall            '-P 1' 
  
_shelx_space_group_comment 
; 
The symmetry employed for this shelxl refinement is uniquely defined 
by the following loop, which should always be used as a source of 
symmetry information in preference to the above space-group names. 
They are only intended as comments. 
; 
  
loop_ 
 _space_group_symop_operation_xyz 
 'x, y, z' 
 '-x, -y, -z' 
  
_cell_length_a                    10.560(2) 
_cell_length_b                    20.205(4) 
_cell_length_c                    22.352(4) 
_cell_angle_alpha                 114.814(4) 
_cell_angle_beta                  101.570(4) 
_cell_angle_gamma                 90.753(4) 
_cell_volume                      4215.4(14) 
_cell_formula_units_Z             4 
_cell_measurement_temperature     120(2) 
_cell_measurement_reflns_used     957 
_cell_measurement_theta_min       2.5 
_cell_measurement_theta_max       29.5 
  
_exptl_crystal_description        prism 
_exptl_crystal_colour             'dark red' 
_exptl_crystal_density_meas       ? 
_exptl_crystal_density_method     ? 
_exptl_crystal_density_diffrn     1.538 
_exptl_crystal_F_000              1968 
_exptl_transmission_factor_min    ? 
_exptl_transmission_factor_max    ? 
_exptl_crystal_size_max           0.460 
_exptl_crystal_size_mid           0.320 
_exptl_crystal_size_min           0.180 
_exptl_absorpt_coefficient_mu     0.892 
_shelx_estimated_absorpt_T_min    0.684 
_shelx_estimated_absorpt_T_max    0.856 
_exptl_absorpt_correction_type    multi-scan 
_exptl_absorpt_correction_T_min   0.659 
_exptl_absorpt_correction_T_max   0.862 
_exptl_absorpt_process_details    SADABS 
_exptl_absorpt_special_details    ? 
_diffrn_ambient_temperature       120(2) 
_diffrn_radiation_wavelength      0.71073 
_diffrn_radiation_type            MoK\a 
_diffrn_source                    ? 
_diffrn_measurement_device_type   'Bruker SMART 1000 CCD area detector' 
_diffrn_measurement_method        'phi and omega scans' 
_diffrn_detector_area_resol_mean  ? 
_diffrn_reflns_number             54553 
_diffrn_reflns_av_unetI/netI      0.0664 
_diffrn_reflns_av_R_equivalents   0.0329 
_diffrn_reflns_limit_h_min        -14 
_diffrn_reflns_limit_h_max        14 
_diffrn_reflns_limit_k_min        -27 
_diffrn_reflns_limit_k_max        27 
_diffrn_reflns_limit_l_min        -30 
_diffrn_reflns_limit_l_max        30 
_diffrn_reflns_theta_min          1.817 
_diffrn_reflns_theta_max          29.000 
_diffrn_reflns_theta_full         25.242 
_diffrn_measured_fraction_theta_max   0.997 
_diffrn_measured_fraction_theta_full  1.000 
_diffrn_reflns_Laue_measured_fraction_max    0.997 
_diffrn_reflns_Laue_measured_fraction_full   1.000 
_diffrn_reflns_point_group_measured_fraction_max   0.997 
_diffrn_reflns_point_group_measured_fraction_full  1.000 
_reflns_number_total              22374 
_reflns_number_gt                 15232 
_reflns_threshold_expression      'I > 2\s(I)' 
_reflns_Friedel_coverage          0.000 
_reflns_Friedel_fraction_max      . 
_reflns_Friedel_fraction_full     . 
  
_reflns_special_details 
; 
 Reflections were merged by SHELXL according to the crystal 
 class for the calculation of statistics and refinement. 
  
 _reflns_Friedel_fraction is defined as the number of unique 
 Friedel pairs measured divided by the number that would be 
 possible theoretically, ignoring centric projections and 
 systematic absences. 
; 
  
_computing_data_collection        'Bruker SMART' 
_computing_cell_refinement        'Bruker SMART' 
_computing_data_reduction         'Bruker SHELXTL' 
_computing_structure_solution     'Bruker SHELXTL' 
_computing_structure_refinement 'SHELXL-2014/7 (Sheldrick, 2014)' 
_computing_molecular_graphics     'Bruker SHELXTL' 
_computing_publication_material   'Bruker SHELXTL' 
_refine_special_details           ? 
_refine_ls_structure_factor_coef  Fsqd 
_refine_ls_matrix_type            full 
_refine_ls_weighting_scheme       calc 
_refine_ls_weighting_details 
'w=1/[\s^2^(Fo^2^)+(0.0300P)^2^+4.0000P] where P=(Fo^2^+2Fc^2^)/3' 
_atom_sites_solution_primary      direct 
_atom_sites_solution_secondary    ? 
_atom_sites_solution_hydrogens    mixed 
_refine_ls_hydrogen_treatment     mixed 
_refine_ls_extinction_method      none 
_refine_ls_extinction_coef        . 
_refine_ls_number_reflns          22374 
_refine_ls_number_parameters      1102 
_refine_ls_number_restraints      0 
_refine_ls_R_factor_all           0.0696 
_refine_ls_R_factor_gt            0.0462 
_refine_ls_wR_factor_ref          0.1000 
_refine_ls_wR_factor_gt           0.0941 
_refine_ls_goodness_of_fit_ref    1.075 
_refine_ls_restrained_S_all       1.075 
_refine_ls_shift/su_max           0.002 
_refine_ls_shift/su_mean          0.000 
  
loop_ 
 _atom_site_label 
 _atom_site_type_symbol 
 _atom_site_fract_x 
 _atom_site_fract_y 
 _atom_site_fract_z 
 _atom_site_U_iso_or_equiv 
 _atom_site_adp_type 
 _atom_site_occupancy 
 _atom_site_site_symmetry_order 
 _atom_site_calc_flag 
 _atom_site_refinement_flags_posn 
 _atom_site_refinement_flags_adp 
 _atom_site_refinement_flags_occupancy 
 _atom_site_disorder_assembly 
 _atom_site_disorder_group 
Ru1A Ru 0.10404(3) 0.28072(2) 0.77178(2) 0.01824(7) Uani 1 1 d . . . . . 
Ru2A Ru 0.03596(3) 0.15262(2) 0.64043(2) 0.02138(7) Uani 1 1 d . . . . . 
Cl1A Cl -0.10525(8) 0.31831(5) 0.79297(4) 0.02313(18) Uani 1 1 d . . . . . 
P1A P 0.10117(9) 0.19410(5) 0.80842(4) 0.01991(19) Uani 1 1 d . . . . . 
P2A P 0.22214(9) 0.37605(5) 0.86569(4) 0.01932(18) Uani 1 1 d . . . . . 
O1A O 0.2678(3) 0.07538(14) 0.58978(14) 0.0364(7) Uani 1 1 d . . . . . 
C1A C -0.0081(4) 0.21849(19) 0.58980(17) 0.0235(8) Uani 1 1 d . . . . . 
B3A B 0.0895(4) 0.1613(2) 0.5512(2) 0.0261(9) Uani 1 1 d . . . . . 
H3A H 0.047(3) 0.1208(17) 0.4989(16) 0.012(8) Uiso 1 1 d . . . . . 
B4A B 0.1097(4) 0.2608(2) 0.5780(2) 0.0256(9) Uani 1 1 d . . . . . 
H4A H 0.071(3) 0.2893(16) 0.5488(15) 0.009(8) Uiso 1 1 d . . . . . 
B5A B 0.0818(4) 0.2733(2) 0.6613(2) 0.0214(8) Uani 1 1 d . . . . . 
H5A H 0.053(3) 0.3198(19) 0.7029(18) 0.024(9) Uiso 1 1 d . . . . . 
B6A B 0.2290(4) 0.1464(2) 0.6102(2) 0.0278(9) Uani 1 1 d . . . . . 
B7A B 0.2508(4) 0.2129(2) 0.5734(2) 0.0287(10) Uani 1 1 d . . . . . 
H7A H 0.296(3) 0.2065(18) 0.5332(17) 0.023(9) Uiso 1 1 d . . . . . 
B8A B 0.2406(4) 0.2904(2) 0.6492(2) 0.0278(10) Uani 1 1 d . . . . . 
H8A H 0.275(4) 0.349(2) 0.6713(19) 0.033(11) Uiso 1 1 d . . . . . 
B9A B 0.2150(4) 0.2323(2) 0.6909(2) 0.0244(9) Uani 1 1 d . . . . . 
H9A H 0.247(4) 0.255(2) 0.754(2) 0.044(12) Uiso 1 1 d . . . . . 
B10A B 0.3377(5) 0.2249(2) 0.6508(2) 0.0288(10) Uani 1 1 d . . . . . 
H10A H 0.444(4) 0.2260(19) 0.6658(18) 0.028(10) Uiso 1 1 d . . . . . 
C11A C 0.4022(4) 0.0644(3) 0.5924(3) 0.0480(12) Uani 1 1 d . . . . . 
H11B H 0.4094 0.0130 0.5634 0.072 Uiso 1 1 calc R U . . . 
H11F H 0.4473 0.0764 0.6391 0.072 Uiso 1 1 calc R U . . . 
H11G H 0.4419 0.0962 0.5765 0.072 Uiso 1 1 calc R U . . . 
C12A C -0.1477(4) 0.2203(2) 0.56285(18) 0.0258(8) Uani 1 1 d . . . . . 
C13A C -0.2061(4) 0.1771(2) 0.4947(2) 0.0391(10) Uani 1 1 d . . . . . 
H13A H -0.1546 0.1494 0.4646 0.047 Uiso 1 1 calc R U . . . 
C14A C -0.3371(4) 0.1745(3) 0.4711(2) 0.0451(11) Uani 1 1 d . . . . . 
H14A H -0.3762 0.1443 0.4249 0.054 Uiso 1 1 calc R U . . . 
C15A C -0.4127(4) 0.2156(3) 0.5143(2) 0.0446(11) Uani 1 1 d . . . . . 
H15A H -0.5034 0.2138 0.4976 0.054 Uiso 1 1 calc R U . . . 
C16A C -0.3567(4) 0.2591(2) 0.5815(2) 0.0418(11) Uani 1 1 d . . . . . 
H16A H -0.4088 0.2870 0.6112 0.050 Uiso 1 1 calc R U . . . 
C17A C -0.2252(4) 0.2620(2) 0.6054(2) 0.0325(9) Uani 1 1 d . . . . . 
H17A H -0.1867 0.2928 0.6515 0.039 Uiso 1 1 calc R U . . . 
C18A C 0.0086(4) 0.12487(19) 0.72567(17) 0.0241(8) Uani 1 1 d . . . . . 
C19A C 0.0719(4) 0.06903(19) 0.68310(18) 0.0274(8) Uani 1 1 d . . . . . 
H19A H 0.1635 0.0632 0.7013 0.033 Uiso 1 1 calc R U . . . 
C20A C 0.0193(4) 0.03254(19) 0.61304(19) 0.0292(9) Uani 1 1 d . . . . . 
H20A H 0.0730 0.0002 0.5827 0.035 Uiso 1 1 calc R U . . . 
C21A C -0.1010(4) 0.0488(2) 0.58449(19) 0.0299(9) Uani 1 1 d . . . . . 
H21A H -0.1319 0.0281 0.5342 0.036 Uiso 1 1 calc R U . . . 
C22A C -0.1689(4) 0.1004(2) 0.62624(19) 0.0277(8) Uani 1 1 d . . . . . 
H22A H -0.2455 0.1178 0.6050 0.033 Uiso 1 1 calc R U . . . 
C23A C -0.1148(4) 0.14008(19) 0.69629(18) 0.0250(8) Uani 1 1 d . . . . . 
H23A H -0.1549 0.1841 0.7236 0.030 Uiso 1 1 calc R U . . . 
C24A C 0.2438(3) 0.14973(19) 0.82613(17) 0.0226(7) Uani 1 1 d . . . . . 
C25A C 0.2317(4) 0.0962(2) 0.84965(18) 0.0264(8) Uani 1 1 d . . . . . 
H25B H 0.1515 0.0860 0.8589 0.032 Uiso 1 1 calc R U . . . 
C26A C 0.3355(4) 0.0580(2) 0.85946(19) 0.0313(9) Uani 1 1 d . . . . . 
H26A H 0.3263 0.0216 0.8752 0.038 Uiso 1 1 calc R U . . . 
C27A C 0.4517(4) 0.0726(2) 0.84651(19) 0.0312(9) Uani 1 1 d . . . . . 
H27B H 0.5229 0.0463 0.8533 0.037 Uiso 1 1 calc R U . . . 
C28A C 0.4653(4) 0.1256(2) 0.8235(2) 0.0339(9) Uani 1 1 d . . . . . 
H28A H 0.5460 0.1355 0.8146 0.041 Uiso 1 1 calc R U . . . 
C29A C 0.3617(4) 0.1642(2) 0.81326(19) 0.0266(8) Uani 1 1 d . . . . . 
H29A H 0.3716 0.2005 0.7975 0.032 Uiso 1 1 calc R U . . . 
C30A C 0.0169(3) 0.20038(19) 0.87402(17) 0.0222(7) Uani 1 1 d . . . . . 
C31A C -0.1122(4) 0.17236(19) 0.86101(18) 0.0242(8) Uani 1 1 d . . . . . 
H31A H -0.1615 0.1477 0.8157 0.029 Uiso 1 1 calc R U . . . 
C32A C -0.1687(4) 0.1808(2) 0.9150(2) 0.0298(9) Uani 1 1 d . . . . . 
H32A H -0.2565 0.1615 0.9059 0.036 Uiso 1 1 calc R U . . . 
C33A C -0.0992(4) 0.2166(2) 0.98064(19) 0.0325(9) Uani 1 1 d . . . . . 
H33A H -0.1392 0.2223 1.0167 0.039 Uiso 1 1 calc R U . . . 
C34A C 0.0298(4) 0.2447(2) 0.99448(19) 0.0312(9) Uani 1 1 d . . . . . 
H34A H 0.0786 0.2695 1.0399 0.037 Uiso 1 1 calc R U . . . 
C35A C 0.0862(4) 0.2359(2) 0.94118(18) 0.0258(8) Uani 1 1 d . . . . . 
H35A H 0.1745 0.2547 0.9506 0.031 Uiso 1 1 calc R U . . . 
C36A C 0.2262(3) 0.46130(18) 0.85470(17) 0.0213(7) Uani 1 1 d . . . . . 
C37A C 0.3362(4) 0.5124(2) 0.88186(19) 0.0300(9) Uani 1 1 d . . . . . 
H37A H 0.4162 0.5008 0.9014 0.036 Uiso 1 1 calc R U . . . 
C38A C 0.3283(4) 0.5811(2) 0.8803(2) 0.0320(9) Uani 1 1 d . . . . . 
H38B H 0.4034 0.6158 0.8982 0.038 Uiso 1 1 calc R U . . . 
C39A C 0.2114(4) 0.5982(2) 0.8525(2) 0.0326(9) Uani 1 1 d . . . . . 
H39A H 0.2053 0.6451 0.8525 0.039 Uiso 1 1 calc R U . . . 
C40A C 0.1040(4) 0.5468(2) 0.8248(2) 0.0324(9) Uani 1 1 d . . . . . 
H40A H 0.0237 0.5584 0.8054 0.039 Uiso 1 1 calc R U . . . 
C41A C 0.1120(4) 0.4784(2) 0.82486(18) 0.0262(8) Uani 1 1 d . . . . . 
H41A H 0.0379 0.4429 0.8041 0.031 Uiso 1 1 calc R U . . . 
C42A C 0.3921(3) 0.35747(18) 0.88095(18) 0.0230(8) Uani 1 1 d . . . . . 
C43A C 0.4495(4) 0.3407(2) 0.93395(19) 0.0286(8) Uani 1 1 d . . . . . 
H43A H 0.4029 0.3436 0.9670 0.034 Uiso 1 1 calc R U . . . 
C44A C 0.5740(4) 0.3199(2) 0.9387(2) 0.0323(9) Uani 1 1 d . . . . . 
H44A H 0.6126 0.3089 0.9752 0.039 Uiso 1 1 calc R U . . . 
C45A C 0.6428(4) 0.3151(2) 0.8905(2) 0.0331(9) Uani 1 1 d . . . . . 
H45A H 0.7287 0.3014 0.8942 0.040 Uiso 1 1 calc R U . . . 
C46A C 0.5861(4) 0.3303(2) 0.8372(2) 0.0303(9) Uani 1 1 d . . . . . 
H46A H 0.6325 0.3264 0.8037 0.036 Uiso 1 1 calc R U . . . 
C47A C 0.4622(3) 0.35130(19) 0.83235(19) 0.0251(8) Uani 1 1 d . . . . . 
H47B H 0.4238 0.3617 0.7954 0.030 Uiso 1 1 calc R U . . . 
C48A C 0.1849(3) 0.41226(18) 0.94986(17) 0.0215(7) Uani 1 1 d . . . . . 
C49A C 0.0631(4) 0.3954(2) 0.95784(18) 0.0261(8) Uani 1 1 d . . . . . 
H49A H -0.0015 0.3632 0.9198 0.031 Uiso 1 1 calc R U . . . 
C50A C 0.0364(4) 0.4259(2) 1.02184(19) 0.0316(9) Uani 1 1 d . . . . . 
H50A H -0.0472 0.4150 1.0273 0.038 Uiso 1 1 calc R U . . . 
C51A C 0.1301(4) 0.4720(2) 1.07747(19) 0.0355(10) Uani 1 1 d . . . . . 
H51A H 0.1122 0.4908 1.1213 0.043 Uiso 1 1 calc R U . . . 
C52A C 0.2488(4) 0.4906(2) 1.0697(2) 0.0368(10) Uani 1 1 d . . . . . 
H52A H 0.3123 0.5235 1.1079 0.044 Uiso 1 1 calc R U . . . 
C53A C 0.2764(4) 0.4613(2) 1.00601(18) 0.0297(9) Uani 1 1 d . . . . . 
H53D H 0.3585 0.4749 1.0007 0.036 Uiso 1 1 calc R U . . . 
Ru1B Ru 0.22851(3) 0.25306(2) 0.25056(2) 0.01877(7) Uani 1 1 d . . . . . 
Ru2B Ru 0.07534(3) 0.14163(2) 0.26438(2) 0.01977(7) Uani 1 1 d . . . . . 
Cl1B Cl 0.07199(8) 0.28903(5) 0.17705(4) 0.02227(18) Uani 1 1 d . . . . . 
P1B P 0.16570(9) 0.32620(5) 0.34464(4) 0.02080(19) Uani 1 1 d . . . . . 
P2B P 0.40197(9) 0.31901(5) 0.24760(4) 0.02077(19) Uani 1 1 d . . . . . 
O1B O 0.2177(3) 0.08632(14) 0.36550(13) 0.0304(6) Uani 1 1 d . . . . . 
C1B C 0.0870(3) 0.06284(18) 0.16813(17) 0.0195(7) Uani 1 1 d . . . . . 
B3B B 0.1273(4) 0.0262(2) 0.2217(2) 0.0216(8) Uani 1 1 d . . . . . 
H3B H 0.065(3) -0.0212(17) 0.2162(16) 0.014(8) Uiso 1 1 d . . . . . 
B4B B 0.2216(4) 0.0250(2) 0.1610(2) 0.0229(9) Uani 1 1 d . . . . . 
H4B H 0.222(3) -0.0229(18) 0.1117(17) 0.021 Uiso 1 1 d . U . . . 
B5B B 0.2055(4) 0.1245(2) 0.1891(2) 0.0214(8) Uani 1 1 d . . . . . 
H5B H 0.210(3) 0.1635(16) 0.1601(15) 0.011(8) Uiso 1 1 d . . . . . 
B6B B 0.2371(4) 0.0909(2) 0.3067(2) 0.0251(9) Uani 1 1 d . . . . . 
B7B B 0.3042(4) 0.0226(2) 0.2383(2) 0.0245(9) Uani 1 1 d . . . . . 
H7B H 0.334(3) -0.028(2) 0.2333(17) 0.025(10) Uiso 1 1 d . . . . . 
B8B B 0.3579(4) 0.0900(2) 0.2128(2) 0.0233(9) Uani 1 1 d . . . . . 
H8B H 0.429(4) 0.094(2) 0.1886(19) 0.038(11) Uiso 1 1 d . . . . . 
B9B B 0.2906(4) 0.1612(2) 0.2771(2) 0.0218(8) Uani 1 1 d . . . . . 
H9B H 0.322(4) 0.228(2) 0.299(2) 0.048(12) Uiso 1 1 d . . . . . 
B10B B 0.3904(4) 0.1054(2) 0.2952(2) 0.0256(9) Uani 1 1 d . . . . . 
H10B H 0.482(3) 0.1149(17) 0.3309(16) 0.012(8) Uiso 1 1 d . . . . . 
C11B C 0.3189(4) 0.0651(2) 0.4032(2) 0.0340(9) Uani 1 1 d . . . . . 
H11A H 0.2918 0.0642 0.4423 0.051 Uiso 1 1 calc R U . . . 
H11C H 0.3966 0.1002 0.4189 0.051 Uiso 1 1 calc R U . . . 
H11D H 0.3387 0.0161 0.3746 0.051 Uiso 1 1 calc R U . . . 
C12B C -0.0247(3) 0.03502(19) 0.10757(17) 0.0228(8) Uani 1 1 d . . . . . 
C13B C -0.0532(4) -0.0397(2) 0.06575(18) 0.0269(8) Uani 1 1 d . . . . . 
H13B H -0.0001 -0.0731 0.0754 0.032 Uiso 1 1 calc R U . . . 
C14B C -0.1580(4) -0.0663(2) 0.01010(19) 0.0303(9) Uani 1 1 d . . . . . 
H14B H -0.1760 -0.1176 -0.0177 0.036 Uiso 1 1 calc R U . . . 
C15B C -0.2352(4) -0.0190(2) -0.00465(19) 0.0326(9) Uani 1 1 d . . . . . 
H15B H -0.3092 -0.0373 -0.0414 0.039 Uiso 1 1 calc R U . . . 
C16B C -0.2049(4) 0.0562(2) 0.03448(19) 0.0326(9) Uani 1 1 d . . . . . 
H16B H -0.2562 0.0893 0.0231 0.039 Uiso 1 1 calc R U . . . 
C17B C -0.1008(4) 0.0831(2) 0.08985(18) 0.0277(8) Uani 1 1 d . . . . . 
H17B H -0.0806 0.1346 0.1161 0.033 Uiso 1 1 calc R U . . . 
C18B C 0.0357(3) 0.25649(18) 0.33071(17) 0.0214(7) Uani 1 1 d . . . . . 
C19B C 0.0528(4) 0.21524(18) 0.36969(17) 0.0226(8) Uani 1 1 d . . . . . 
H19B H 0.1297 0.2296 0.4087 0.027 Uiso 1 1 calc R U . . . 
C20B C -0.0212(4) 0.1463(2) 0.34548(18) 0.0254(8) Uani 1 1 d . . . . . 
H20B H 0.0034 0.1137 0.3685 0.030 Uiso 1 1 calc R U . . . 
C21B C -0.1175(4) 0.1193(2) 0.28487(19) 0.0268(8) Uani 1 1 d . . . . . 
H21B H -0.1604 0.0679 0.2650 0.032 Uiso 1 1 calc R U . . . 
C22B C -0.1404(4) 0.1618(2) 0.24785(19) 0.0268(8) Uani 1 1 d . . . . . 
H22B H -0.1960 0.1387 0.2009 0.032 Uiso 1 1 calc R U . . . 
C23B C -0.0631(3) 0.22793(19) 0.26893(18) 0.0238(8) Uani 1 1 d . . . . . 
H23B H -0.0669 0.2512 0.2370 0.029 Uiso 1 1 calc R U . . . 
C24B C 0.2619(4) 0.35066(19) 0.42983(17) 0.0231(8) Uani 1 1 d . . . . . 
C25B C 0.2071(4) 0.3816(2) 0.48544(18) 0.0290(9) Uani 1 1 d . . . . . 
H25A H 0.1176 0.3889 0.4790 0.035 Uiso 1 1 calc R U . . . 
C26B C 0.2813(4) 0.4022(2) 0.55039(19) 0.0322(9) Uani 1 1 d . . . . . 
H26B H 0.2423 0.4225 0.5881 0.039 Uiso 1 1 calc R U . . . 
C27B C 0.4098(4) 0.3931(2) 0.55996(19) 0.0351(10) Uani 1 1 d . . . . . 
H27A H 0.4603 0.4073 0.6045 0.042 Uiso 1 1 calc R U . . . 
C28B C 0.4678(4) 0.3636(2) 0.50569(19) 0.0388(10) Uani 1 1 d . . . . . 
H28B H 0.5583 0.3589 0.5128 0.047 Uiso 1 1 calc R U . . . 
C29B C 0.3925(4) 0.3409(2) 0.44033(19) 0.0309(9) Uani 1 1 d . . . . . 
H29B H 0.4311 0.3185 0.4027 0.037 Uiso 1 1 calc R U . . . 
C30B C 0.0943(4) 0.41145(19) 0.35561(17) 0.0247(8) Uani 1 1 d . . . . . 
C31B C -0.0365(4) 0.4133(2) 0.3306(2) 0.0328(9) Uani 1 1 d . . . . . 
H31B H -0.0950 0.3696 0.3099 0.039 Uiso 1 1 calc R U . . . 
C32B C -0.0812(4) 0.4795(2) 0.3363(2) 0.0390(10) Uani 1 1 d . . . . . 
H32B H -0.1703 0.4807 0.3185 0.047 Uiso 1 1 calc R U . . . 
C33B C 0.0014(5) 0.5433(2) 0.3671(2) 0.0390(10) Uani 1 1 d . . . . . 
H33B H -0.0306 0.5881 0.3704 0.047 Uiso 1 1 calc R U . . . 
C34B C 0.1299(4) 0.5424(2) 0.3931(2) 0.0361(10) Uani 1 1 d . . . . . 
H34B H 0.1868 0.5867 0.4149 0.043 Uiso 1 1 calc R U . . . 
C35B C 0.1774(4) 0.4765(2) 0.38784(19) 0.0306(9) Uani 1 1 d . . . . . 
H35B H 0.2665 0.4760 0.4062 0.037 Uiso 1 1 calc R U . . . 
C36B C 0.4602(3) 0.27043(19) 0.16910(17) 0.0225(7) Uani 1 1 d . . . . . 
C37B C 0.5896(4) 0.2588(2) 0.16913(18) 0.0263(8) Uani 1 1 d . . . . . 
H37B H 0.6519 0.2743 0.2108 0.032 Uiso 1 1 calc R U . . . 
C38B C 0.6280(4) 0.2243(2) 0.10782(19) 0.0311(9) Uani 1 1 d . . . . . 
H38A H 0.7162 0.2154 0.1082 0.037 Uiso 1 1 calc R U . . . 
C39B C 0.5395(4) 0.2030(2) 0.0469(2) 0.0321(9) Uani 1 1 d . . . . . 
H39B H 0.5661 0.1802 0.0054 0.038 Uiso 1 1 calc R U . . . 
C40B C 0.4117(4) 0.2155(2) 0.04740(19) 0.0344(9) Uani 1 1 d . . . . . 
H40B H 0.3498 0.2012 0.0057 0.041 Uiso 1 1 calc R U . . . 
C41B C 0.3720(4) 0.2487(2) 0.10767(19) 0.0303(9) Uani 1 1 d . . . . . 
H41B H 0.2833 0.2566 0.1069 0.036 Uiso 1 1 calc R U . . . 
C42B C 0.5450(3) 0.3311(2) 0.31453(17) 0.0234(8) Uani 1 1 d . . . . . 
C43B C 0.5998(4) 0.3992(2) 0.36595(18) 0.0289(8) Uani 1 1 d . . . . . 
H43B H 0.5666 0.4424 0.3652 0.035 Uiso 1 1 calc R U . . . 
C44B C 0.7018(4) 0.4050(2) 0.4182(2) 0.0365(10) Uani 1 1 d . . . . . 
H44B H 0.7379 0.4520 0.4529 0.044 Uiso 1 1 calc R U . . . 
C45B C 0.7517(4) 0.3425(2) 0.4201(2) 0.0366(10) Uani 1 1 d . . . . . 
H45B H 0.8220 0.3464 0.4558 0.044 Uiso 1 1 calc R U . . . 
C46B C 0.6975(4) 0.2745(2) 0.36928(19) 0.0313(9) Uani 1 1 d . . . . . 
H46B H 0.7308 0.2315 0.3704 0.038 Uiso 1 1 calc R U . . . 
C47B C 0.5959(4) 0.2681(2) 0.31703(18) 0.0259(8) Uani 1 1 d . . . . . 
H47A H 0.5601 0.2210 0.2825 0.031 Uiso 1 1 calc R U . . . 
C48B C 0.3946(4) 0.41037(19) 0.24926(17) 0.0238(8) Uani 1 1 d . . . . . 
C49B C 0.2854(4) 0.4462(2) 0.25621(18) 0.0269(8) Uani 1 1 d . . . . . 
H49B H 0.2095 0.4228 0.2589 0.032 Uiso 1 1 calc R U . . . 
C50B C 0.2842(4) 0.5169(2) 0.25944(19) 0.0348(10) Uani 1 1 d . . . . . 
H50B H 0.2076 0.5409 0.2638 0.042 Uiso 1 1 calc R U . . . 
C51B C 0.3945(4) 0.5517(2) 0.25622(18) 0.0353(10) Uani 1 1 d . . . . . 
H51B H 0.3947 0.6002 0.2596 0.042 Uiso 1 1 calc R U . . . 
C52B C 0.5046(4) 0.5156(2) 0.24801(19) 0.0344(10) Uani 1 1 d . . . . . 
H52B H 0.5798 0.5389 0.2447 0.041 Uiso 1 1 calc R U . . . 
C53B C 0.5059(4) 0.4457(2) 0.24457(18) 0.0297(9) Uani 1 1 d . . . . . 
H53A H 0.5820 0.4214 0.2390 0.036 Uiso 1 1 calc R U . . . 
  
loop_ 
 _atom_site_aniso_label 
 _atom_site_aniso_U_11 
 _atom_site_aniso_U_22 
 _atom_site_aniso_U_33 
 _atom_site_aniso_U_23 
 _atom_site_aniso_U_13 
 _atom_site_aniso_U_12 
Ru1A 0.01876(15) 0.01785(14) 0.01724(13) 0.00669(11) 0.00428(11) 0.00028(11) 
Ru2A 0.02557(16) 0.01804(14) 0.01853(14) 0.00635(12) 0.00445(12) -0.00210(12) 
Cl1A 0.0176(4) 0.0275(4) 0.0224(4) 0.0090(4) 0.0046(3) 0.0022(3) 
P1A 0.0220(5) 0.0185(4) 0.0187(4) 0.0073(4) 0.0054(4) 0.0008(4) 
P2A 0.0195(5) 0.0185(4) 0.0185(4) 0.0067(4) 0.0044(4) 0.0010(4) 
O1A 0.0372(17) 0.0295(15) 0.0386(16) 0.0092(13) 0.0122(14) 0.0062(13) 
C1A 0.032(2) 0.0219(18) 0.0183(17) 0.0092(15) 0.0076(15) 0.0031(16) 
B3A 0.035(3) 0.019(2) 0.022(2) 0.0075(17) 0.0032(19) -0.0018(18) 
B4A 0.034(2) 0.023(2) 0.019(2) 0.0075(17) 0.0081(18) -0.0030(18) 
B5A 0.025(2) 0.0187(19) 0.021(2) 0.0092(17) 0.0048(17) -0.0016(17) 
B6A 0.026(2) 0.028(2) 0.023(2) 0.0044(18) 0.0066(18) 0.0007(18) 
B7A 0.033(3) 0.026(2) 0.025(2) 0.0060(19) 0.012(2) -0.0013(19) 
B8A 0.035(3) 0.031(2) 0.026(2) 0.015(2) 0.016(2) 0.007(2) 
B9A 0.030(2) 0.025(2) 0.0172(19) 0.0078(17) 0.0056(17) 0.0015(18) 
B10A 0.028(2) 0.030(2) 0.029(2) 0.011(2) 0.012(2) 0.0024(19) 
C11A 0.034(3) 0.044(3) 0.059(3) 0.016(2) 0.005(2) 0.015(2) 
C12A 0.030(2) 0.0260(19) 0.0223(18) 0.0122(16) 0.0053(16) -0.0022(16) 
C13A 0.035(2) 0.048(3) 0.028(2) 0.012(2) 0.0046(19) -0.001(2) 
C14A 0.037(3) 0.056(3) 0.034(2) 0.016(2) -0.002(2) -0.004(2) 
C15A 0.023(2) 0.053(3) 0.056(3) 0.029(3) -0.006(2) -0.003(2) 
C16A 0.034(3) 0.050(3) 0.044(3) 0.022(2) 0.010(2) 0.012(2) 
C17A 0.033(2) 0.032(2) 0.029(2) 0.0130(18) 0.0010(18) 0.0031(18) 
C18A 0.029(2) 0.0240(18) 0.0206(18) 0.0112(15) 0.0065(16) -0.0050(16) 
C19A 0.040(2) 0.0174(18) 0.0259(19) 0.0098(16) 0.0092(17) -0.0034(16) 
C20A 0.041(2) 0.0193(18) 0.026(2) 0.0085(16) 0.0082(18) -0.0030(17) 
C21A 0.043(2) 0.0232(19) 0.0225(19) 0.0096(16) 0.0058(18) -0.0102(17) 
C22A 0.028(2) 0.0248(19) 0.031(2) 0.0142(17) 0.0032(17) -0.0089(16) 
C23A 0.027(2) 0.0216(18) 0.029(2) 0.0132(16) 0.0053(16) -0.0046(15) 
C24A 0.0244(19) 0.0207(18) 0.0194(17) 0.0065(15) 0.0027(15) 0.0043(15) 
C25A 0.023(2) 0.031(2) 0.028(2) 0.0140(17) 0.0092(16) 0.0056(16) 
C26A 0.039(2) 0.027(2) 0.031(2) 0.0161(18) 0.0062(18) 0.0054(18) 
C27A 0.035(2) 0.027(2) 0.034(2) 0.0148(18) 0.0097(18) 0.0148(18) 
C28A 0.025(2) 0.034(2) 0.047(3) 0.018(2) 0.0164(19) 0.0087(17) 
C29A 0.027(2) 0.0230(19) 0.034(2) 0.0140(17) 0.0104(17) 0.0064(16) 
C30A 0.0252(19) 0.0225(18) 0.0216(18) 0.0112(15) 0.0071(15) 0.0045(15) 
C31A 0.025(2) 0.0242(19) 0.0242(18) 0.0123(16) 0.0031(15) 0.0012(15) 
C32A 0.025(2) 0.033(2) 0.041(2) 0.0216(19) 0.0132(18) 0.0080(17) 
C33A 0.048(3) 0.032(2) 0.028(2) 0.0189(18) 0.0158(19) 0.0139(19) 
C34A 0.042(2) 0.030(2) 0.0212(19) 0.0114(17) 0.0032(17) 0.0059(18) 
C35A 0.024(2) 0.0267(19) 0.0242(19) 0.0096(16) 0.0031(16) 0.0014(16) 
C36A 0.0256(19) 0.0177(17) 0.0217(18) 0.0079(15) 0.0089(15) 0.0039(15) 
C37A 0.028(2) 0.028(2) 0.032(2) 0.0118(18) 0.0068(17) 0.0024(17) 
C38A 0.032(2) 0.024(2) 0.038(2) 0.0101(18) 0.0108(19) -0.0033(17) 
C39A 0.043(3) 0.0225(19) 0.039(2) 0.0169(18) 0.014(2) 0.0066(18) 
C40A 0.031(2) 0.033(2) 0.040(2) 0.0208(19) 0.0091(19) 0.0091(18) 
C41A 0.025(2) 0.0246(19) 0.028(2) 0.0111(16) 0.0053(16) 0.0003(16) 
C42A 0.0228(19) 0.0131(16) 0.0277(19) 0.0058(15) 0.0010(15) -0.0002(14) 
C43A 0.032(2) 0.029(2) 0.026(2) 0.0127(17) 0.0073(17) 0.0028(17) 
C44A 0.030(2) 0.033(2) 0.034(2) 0.0189(19) -0.0022(18) 0.0051(18) 
C45A 0.024(2) 0.026(2) 0.048(3) 0.0145(19) 0.0077(19) 0.0056(17) 
C46A 0.024(2) 0.030(2) 0.040(2) 0.0171(19) 0.0099(18) 0.0043(17) 
C47A 0.0205(19) 0.0251(19) 0.030(2) 0.0121(17) 0.0070(16) 0.0009(15) 
C48A 0.0250(19) 0.0197(17) 0.0173(17) 0.0056(14) 0.0047(15) 0.0025(15) 
C49A 0.026(2) 0.0242(19) 0.0248(19) 0.0075(16) 0.0060(16) 0.0045(16) 
C50A 0.033(2) 0.036(2) 0.029(2) 0.0134(18) 0.0145(18) 0.0065(18) 
C51A 0.048(3) 0.037(2) 0.0182(19) 0.0060(17) 0.0138(18) 0.004(2) 
C52A 0.043(3) 0.032(2) 0.022(2) 0.0017(18) 0.0033(18) -0.0049(19) 
C53A 0.031(2) 0.028(2) 0.0232(19) 0.0039(16) 0.0065(17) -0.0045(17) 
Ru1B 0.02133(15) 0.01741(14) 0.01761(14) 0.00721(11) 0.00529(11) 0.00200(11) 
Ru2B 0.02219(15) 0.01778(14) 0.01983(14) 0.00753(12) 0.00714(12) 0.00237(11) 
Cl1B 0.0238(4) 0.0220(4) 0.0215(4) 0.0103(4) 0.0040(3) 0.0039(3) 
P1B 0.0253(5) 0.0179(4) 0.0188(4) 0.0068(4) 0.0066(4) 0.0027(4) 
P2B 0.0231(5) 0.0187(4) 0.0196(4) 0.0073(4) 0.0051(4) 0.0000(4) 
O1B 0.0347(16) 0.0326(15) 0.0272(14) 0.0163(12) 0.0067(12) 0.0049(12) 
C1B 0.0220(18) 0.0177(17) 0.0197(17) 0.0081(14) 0.0063(14) 0.0048(14) 
B3B 0.027(2) 0.0160(19) 0.022(2) 0.0065(16) 0.0081(17) 0.0033(17) 
B4B 0.027(2) 0.019(2) 0.021(2) 0.0057(17) 0.0084(17) 0.0041(17) 
B5B 0.019(2) 0.022(2) 0.025(2) 0.0111(17) 0.0073(17) 0.0031(16) 
B6B 0.028(2) 0.020(2) 0.029(2) 0.0122(18) 0.0066(19) 0.0030(17) 
B7B 0.028(2) 0.021(2) 0.026(2) 0.0116(18) 0.0068(18) 0.0054(18) 
B8B 0.026(2) 0.021(2) 0.024(2) 0.0091(17) 0.0094(18) 0.0057(17) 
B9B 0.024(2) 0.0154(19) 0.022(2) 0.0055(16) 0.0050(17) 0.0005(16) 
B10B 0.026(2) 0.025(2) 0.027(2) 0.0130(19) 0.0048(19) 0.0013(18) 
C11B 0.035(2) 0.035(2) 0.033(2) 0.0206(19) -0.0011(18) -0.0025(19) 
C12B 0.0231(19) 0.0244(18) 0.0199(17) 0.0078(15) 0.0072(15) -0.0012(15) 
C13B 0.031(2) 0.0233(19) 0.029(2) 0.0122(16) 0.0087(17) 0.0012(16) 
C14B 0.035(2) 0.028(2) 0.025(2) 0.0079(17) 0.0076(17) -0.0047(17) 
C15B 0.030(2) 0.040(2) 0.024(2) 0.0124(18) 0.0007(17) -0.0059(18) 
C16B 0.035(2) 0.038(2) 0.024(2) 0.0147(18) 0.0016(17) 0.0069(19) 
C17B 0.038(2) 0.0192(18) 0.0224(19) 0.0055(15) 0.0071(17) 0.0047(16) 
C18B 0.0256(19) 0.0162(17) 0.0232(18) 0.0070(15) 0.0105(15) 0.0075(14) 
C19B 0.027(2) 0.0204(18) 0.0212(18) 0.0060(15) 0.0132(15) 0.0080(15) 
C20B 0.030(2) 0.0257(19) 0.0254(19) 0.0122(16) 0.0147(17) 0.0087(16) 
C21B 0.024(2) 0.0248(19) 0.033(2) 0.0099(17) 0.0143(17) 0.0026(16) 
C22B 0.025(2) 0.0253(19) 0.027(2) 0.0065(16) 0.0096(16) 0.0025(16) 
C23B 0.025(2) 0.0217(18) 0.0271(19) 0.0096(16) 0.0136(16) 0.0065(15) 
C24B 0.027(2) 0.0216(18) 0.0228(18) 0.0108(15) 0.0073(15) 0.0020(15) 
C25B 0.035(2) 0.027(2) 0.0242(19) 0.0094(17) 0.0075(17) -0.0008(17) 
C26B 0.046(3) 0.028(2) 0.0197(19) 0.0054(16) 0.0120(18) 0.0013(18) 
C27B 0.048(3) 0.037(2) 0.0188(19) 0.0126(18) 0.0037(18) 0.004(2) 
C28B 0.034(2) 0.053(3) 0.023(2) 0.013(2) 0.0018(18) 0.007(2) 
C29B 0.033(2) 0.038(2) 0.0233(19) 0.0135(18) 0.0094(17) 0.0082(18) 
C30B 0.036(2) 0.0221(18) 0.0184(17) 0.0089(15) 0.0100(16) 0.0079(16) 
C31B 0.037(2) 0.028(2) 0.032(2) 0.0108(18) 0.0091(19) 0.0068(18) 
C32B 0.040(3) 0.037(2) 0.037(2) 0.012(2) 0.009(2) 0.017(2) 
C33B 0.058(3) 0.027(2) 0.041(2) 0.018(2) 0.021(2) 0.021(2) 
C34B 0.052(3) 0.023(2) 0.034(2) 0.0113(18) 0.015(2) 0.0040(19) 
C35B 0.036(2) 0.027(2) 0.029(2) 0.0111(17) 0.0105(18) 0.0024(17) 
C36B 0.0245(19) 0.0204(18) 0.0233(18) 0.0089(15) 0.0085(15) -0.0001(15) 
C37B 0.028(2) 0.027(2) 0.0218(18) 0.0092(16) 0.0041(16) -0.0003(16) 
C38B 0.031(2) 0.033(2) 0.030(2) 0.0107(18) 0.0157(18) 0.0080(17) 
C39B 0.041(2) 0.026(2) 0.027(2) 0.0067(17) 0.0152(19) 0.0037(18) 
C40B 0.032(2) 0.043(2) 0.023(2) 0.0118(19) 0.0005(17) -0.0035(19) 
C41B 0.026(2) 0.034(2) 0.030(2) 0.0128(18) 0.0077(17) 0.0033(17) 
C42B 0.0218(19) 0.030(2) 0.0178(17) 0.0094(16) 0.0047(15) -0.0022(15) 
C43B 0.031(2) 0.027(2) 0.0248(19) 0.0082(17) 0.0051(17) 0.0000(17) 
C44B 0.037(2) 0.035(2) 0.026(2) 0.0066(18) -0.0014(18) -0.0061(19) 
C45B 0.029(2) 0.051(3) 0.027(2) 0.016(2) 0.0045(18) 0.002(2) 
C46B 0.027(2) 0.039(2) 0.032(2) 0.0177(19) 0.0098(17) 0.0114(18) 
C47B 0.023(2) 0.032(2) 0.0232(18) 0.0119(17) 0.0078(16) 0.0030(16) 
C48B 0.030(2) 0.0202(18) 0.0176(17) 0.0063(15) 0.0027(15) -0.0034(15) 
C49B 0.034(2) 0.0254(19) 0.0222(19) 0.0117(16) 0.0061(16) 0.0010(17) 
C50B 0.054(3) 0.027(2) 0.025(2) 0.0119(17) 0.0098(19) 0.0113(19) 
C51B 0.060(3) 0.0219(19) 0.022(2) 0.0090(17) 0.0080(19) -0.001(2) 
C52B 0.049(3) 0.028(2) 0.025(2) 0.0111(17) 0.0083(19) -0.0084(19) 
C53B 0.036(2) 0.028(2) 0.0215(19) 0.0095(16) 0.0023(17) -0.0065(17) 
  
_geom_special_details 
; 
 All esds (except the esd in the dihedral angle between two l.s. planes) 
 are estimated using the full covariance matrix.  The cell esds are taken 
 into account individually in the estimation of esds in distances, angles 
 and torsion angles; correlations between esds in cell parameters are only 
 used when they are defined by crystal symmetry.  An approximate (isotropic) 
 treatment of cell esds is used for estimating esds involving l.s. planes. 
; 
  
loop_ 
 _geom_bond_atom_site_label_1 
 _geom_bond_atom_site_label_2 
 _geom_bond_distance 
 _geom_bond_site_symmetry_2 
 _geom_bond_publ_flag 
Ru1A P1A 2.2241(10) . ? 
Ru1A B9A 2.234(4) . ? 
Ru1A P2A 2.2726(10) . ? 
Ru1A B5A 2.372(4) . ? 
Ru1A Cl1A 2.4182(10) . ? 
Ru1A Ru2A 2.9261(6) . ? 
Ru1A H5A 2.00(3) . ? 
Ru1A H9A 1.67(4) . ? 
Ru2A C1A 2.083(3) . ? 
Ru2A B9A 2.231(4) . ? 
Ru2A C20A 2.234(4) . ? 
Ru2A C21A 2.247(4) . ? 
Ru2A B3A 2.253(4) . ? 
Ru2A B6A 2.262(4) . ? 
Ru2A C19A 2.265(3) . ? 
Ru2A C18A 2.268(3) . ? 
Ru2A C23A 2.283(3) . ? 
Ru2A C22A 2.297(4) . ? 
Ru2A B5A 2.306(4) . ? 
P1A C24A 1.823(4) . ? 
P1A C30A 1.824(3) . ? 
P1A C18A 1.844(4) . ? 
P2A C42A 1.832(4) . ? 
P2A C48A 1.838(3) . ? 
P2A C36A 1.840(3) . ? 
O1A B6A 1.405(5) . ? 
O1A C11A 1.433(5) . ? 
C1A C12A 1.484(5) . ? 
C1A B5A 1.600(5) . ? 
C1A B4A 1.625(5) . ? 
C1A B3A 1.641(6) . ? 
B3A B4A 1.836(6) . ? 
B3A B7A 1.848(6) . ? 
B3A B6A 1.889(6) . ? 
B3A H3A 1.10(3) . ? 
B4A B8A 1.759(6) . ? 
B4A B7A 1.785(7) . ? 
B4A B5A 1.857(5) . ? 
B4A H4A 1.06(3) . ? 
B5A B9A 1.794(6) . ? 
B5A B8A 1.803(6) . ? 
B5A H5A 1.11(3) . ? 
B6A B10A 1.728(6) . ? 
B6A B7A 1.880(6) . ? 
B6A B9A 1.944(6) . ? 
B7A B10A 1.704(6) . ? 
B7A B8A 1.785(6) . ? 
B7A H7A 1.06(3) . ? 
B8A B10A 1.692(6) . ? 
B8A B9A 1.825(6) . ? 
B8A H8A 1.10(4) . ? 
B9A B10A 1.692(6) . ? 
B9A H9A 1.25(4) . ? 
B10A H10A 1.10(4) . ? 
C11A H11B 0.9800 . ? 
C11A H11F 0.9800 . ? 
C11A H11G 0.9800 . ? 
C12A C17A 1.393(5) . ? 
C12A C13A 1.398(5) . ? 
C13A C14A 1.370(6) . ? 
C13A H13A 0.9500 . ? 
C14A C15A 1.382(6) . ? 
C14A H14A 0.9500 . ? 
C15A C16A 1.378(6) . ? 
C15A H15A 0.9500 . ? 
C16A C17A 1.375(6) . ? 
C16A H16A 0.9500 . ? 
C17A H17A 0.9500 . ? 
C18A C19A 1.414(5) . ? 
C18A C23A 1.435(5) . ? 
C19A C20A 1.406(5) . ? 
C19A H19A 1.0000 . ? 
C20A C21A 1.411(6) . ? 
C20A H20A 1.0000 . ? 
C21A C22A 1.394(5) . ? 
C21A H21A 1.0000 . ? 
C22A C23A 1.413(5) . ? 
C22A H22A 1.0000 . ? 
C23A H23A 1.0000 . ? 
C24A C29A 1.387(5) . ? 
C24A C25A 1.402(5) . ? 
C25A C26A 1.383(5) . ? 
C25A H25B 0.9500 . ? 
C26A C27A 1.372(5) . ? 
C26A H26A 0.9500 . ? 
C27A C28A 1.386(5) . ? 
C27A H27B 0.9500 . ? 
C28A C29A 1.390(5) . ? 
C28A H28A 0.9500 . ? 
C29A H29A 0.9500 . ? 
C30A C31A 1.395(5) . ? 
C30A C35A 1.395(5) . ? 
C31A C32A 1.399(5) . ? 
C31A H31A 0.9500 . ? 
C32A C33A 1.371(5) . ? 
C32A H32A 0.9500 . ? 
C33A C34A 1.392(6) . ? 
C33A H33A 0.9500 . ? 
C34A C35A 1.384(5) . ? 
C34A H34A 0.9500 . ? 
C35A H35A 0.9500 . ? 
C36A C41A 1.379(5) . ? 
C36A C37A 1.394(5) . ? 
C37A C38A 1.407(5) . ? 
C37A H37A 0.9500 . ? 
C38A C39A 1.383(6) . ? 
C38A H38B 0.9500 . ? 
C39A C40A 1.377(5) . ? 
C39A H39A 0.9500 . ? 
C40A C41A 1.387(5) . ? 
C40A H40A 0.9500 . ? 
C41A H41A 0.9500 . ? 
C42A C43A 1.392(5) . ? 
C42A C47A 1.398(5) . ? 
C43A C44A 1.383(5) . ? 
C43A H43A 0.9500 . ? 
C44A C45A 1.389(5) . ? 
C44A H44A 0.9500 . ? 
C45A C46A 1.377(5) . ? 
C45A H45A 0.9500 . ? 
C46A C47A 1.379(5) . ? 
C46A H46A 0.9500 . ? 
C47A H47B 0.9500 . ? 
C48A C49A 1.390(5) . ? 
C48A C53A 1.391(5) . ? 
C49A C50A 1.390(5) . ? 
C49A H49A 0.9500 . ? 
C50A C51A 1.379(6) . ? 
C50A H50A 0.9500 . ? 
C51A C52A 1.369(6) . ? 
C51A H51A 0.9500 . ? 
C52A C53A 1.388(5) . ? 
C52A H52A 0.9500 . ? 
C53A H53D 0.9500 . ? 
Ru1B P1B 2.2412(10) . ? 
Ru1B B9B 2.242(4) . ? 
Ru1B P2B 2.2790(10) . ? 
Ru1B B5B 2.356(4) . ? 
Ru1B Cl1B 2.4299(9) . ? 
Ru1B Ru2B 2.9101(6) . ? 
Ru1B H5B 2.04(3) . ? 
Ru1B H9B 1.56(4) . ? 
Ru2B C1B 2.101(3) . ? 
Ru2B C20B 2.221(3) . ? 
Ru2B B3B 2.242(4) . ? 
Ru2B B9B 2.242(4) . ? 
Ru2B B6B 2.253(4) . ? 
Ru2B C21B 2.255(3) . ? 
Ru2B C19B 2.260(3) . ? 
Ru2B C18B 2.268(3) . ? 
Ru2B C23B 2.273(4) . ? 
Ru2B B5B 2.300(4) . ? 
Ru2B C22B 2.303(4) . ? 
P1B C24B 1.823(4) . ? 
P1B C30B 1.830(4) . ? 
P1B C18B 1.837(4) . ? 
P2B C42B 1.832(4) . ? 
P2B C48B 1.834(4) . ? 
P2B C36B 1.850(3) . ? 
O1B B6B 1.410(5) . ? 
O1B C11B 1.411(4) . ? 
C1B C12B 1.498(5) . ? 
C1B B5B 1.602(5) . ? 
C1B B4B 1.627(5) . ? 
C1B B3B 1.646(5) . ? 
B3B B4B 1.829(5) . ? 
B3B B7B 1.839(6) . ? 
B3B B6B 1.911(6) . ? 
B3B H3B 1.10(3) . ? 
B4B B8B 1.773(6) . ? 
B4B B7B 1.792(6) . ? 
B4B B5B 1.859(6) . ? 
B4B H4B 1.12(3) . ? 
B5B B9B 1.810(6) . ? 
B5B B8B 1.831(6) . ? 
B5B H5B 1.22(3) . ? 
B6B B10B 1.729(6) . ? 
B6B B7B 1.851(6) . ? 
B6B B9B 1.921(5) . ? 
B7B B10B 1.718(6) . ? 
B7B B8B 1.806(6) . ? 
B7B H7B 1.04(4) . ? 
B8B B10B 1.694(6) . ? 
B8B B9B 1.828(6) . ? 
B8B H8B 1.04(4) . ? 
B9B B10B 1.670(6) . ? 
B9B H9B 1.25(4) . ? 
B10B H10B 1.08(3) . ? 
C11B H11A 0.9800 . ? 
C11B H11C 0.9800 . ? 
C11B H11D 0.9800 . ? 
C12B C13B 1.390(5) . ? 
C12B C17B 1.402(5) . ? 
C13B C14B 1.390(5) . ? 
C13B H13B 0.9500 . ? 
C14B C15B 1.366(5) . ? 
C14B H14B 0.9500 . ? 
C15B C16B 1.391(5) . ? 
C15B H15B 0.9500 . ? 
C16B C17B 1.382(5) . ? 
C16B H16B 0.9500 . ? 
C17B H17B 0.9500 . ? 
C18B C19B 1.427(5) . ? 
C18B C23B 1.438(5) . ? 
C19B C20B 1.419(5) . ? 
C19B H19B 1.0000 . ? 
C20B C21B 1.407(5) . ? 
C20B H20B 1.0000 . ? 
C21B C22B 1.417(5) . ? 
C21B H21B 1.0000 . ? 
C22B C23B 1.400(5) . ? 
C22B H22B 1.0000 . ? 
C23B H23B 1.0000 . ? 
C24B C29B 1.382(5) . ? 
C24B C25B 1.385(5) . ? 
C25B C26B 1.387(5) . ? 
C25B H25A 0.9500 . ? 
C26B C27B 1.358(6) . ? 
C26B H26B 0.9500 . ? 
C27B C28B 1.379(5) . ? 
C27B H27A 0.9500 . ? 
C28B C29B 1.392(5) . ? 
C28B H28B 0.9500 . ? 
C29B H29B 0.9500 . ? 
C30B C31B 1.390(5) . ? 
C30B C35B 1.392(5) . ? 
C31B C32B 1.388(5) . ? 
C31B H31B 0.9500 . ? 
C32B C33B 1.371(6) . ? 
C32B H32B 0.9500 . ? 
C33B C34B 1.369(6) . ? 
C33B H33B 0.9500 . ? 
C34B C35B 1.396(5) . ? 
C34B H34B 0.9500 . ? 
C35B H35B 0.9500 . ? 
C36B C41B 1.384(5) . ? 
C36B C37B 1.389(5) . ? 
C37B C38B 1.399(5) . ? 
C37B H37B 0.9500 . ? 
C38B C39B 1.378(5) . ? 
C38B H38A 0.9500 . ? 
C39B C40B 1.378(6) . ? 
C39B H39B 0.9500 . ? 
C40B C41B 1.384(5) . ? 
C40B H40B 0.9500 . ? 
C41B H41B 0.9500 . ? 
C42B C43B 1.391(5) . ? 
C42B C47B 1.405(5) . ? 
C43B C44B 1.384(5) . ? 
C43B H43B 0.9500 . ? 
C44B C45B 1.388(6) . ? 
C44B H44B 0.9500 . ? 
C45B C46B 1.384(6) . ? 
C45B H45B 0.9500 . ? 
C46B C47B 1.378(5) . ? 
C46B H46B 0.9500 . ? 
C47B H47A 0.9500 . ? 
C48B C49B 1.370(5) . ? 
C48B C53B 1.412(5) . ? 
C49B C50B 1.399(5) . ? 
C49B H49B 0.9500 . ? 
C50B C51B 1.382(6) . ? 
C50B H50B 0.9500 . ? 
C51B C52B 1.384(6) . ? 
C51B H51B 0.9500 . ? 
C52B C53B 1.381(5) . ? 
C52B H52B 0.9500 . ? 
C53B H53A 0.9500 . ? 
  
loop_ 
 _geom_angle_atom_site_label_1 
 _geom_angle_atom_site_label_2 
 _geom_angle_atom_site_label_3 
 _geom_angle 
 _geom_angle_site_symmetry_1 
 _geom_angle_site_symmetry_3 
 _geom_angle_publ_flag 
P1A Ru1A B9A 101.28(11) . . ? 
P1A Ru1A P2A 101.09(4) . . ? 
B9A Ru1A P2A 112.57(11) . . ? 
P1A Ru1A B5A 131.48(10) . . ? 
B9A Ru1A B5A 45.71(15) . . ? 
P2A Ru1A B5A 122.70(10) . . ? 
P1A Ru1A Cl1A 95.03(3) . . ? 
B9A Ru1A Cl1A 143.99(11) . . ? 
P2A Ru1A Cl1A 95.18(3) . . ? 
B5A Ru1A Cl1A 100.26(11) . . ? 
P1A Ru1A Ru2A 81.49(3) . . ? 
B9A Ru1A Ru2A 49.02(11) . . ? 
P2A Ru1A Ru2A 161.16(3) . . ? 
B5A Ru1A Ru2A 50.28(10) . . ? 
Cl1A Ru1A Ru2A 103.22(2) . . ? 
P1A Ru1A H5A 153.2(10) . . ? 
B9A Ru1A H5A 70.4(10) . . ? 
P2A Ru1A H5A 105.6(10) . . ? 
B5A Ru1A H5A 27.7(10) . . ? 
Cl1A Ru1A H5A 80.6(10) . . ? 
Ru2A Ru1A H5A 74.0(10) . . ? 
P1A Ru1A H9A 86.7(13) . . ? 
B9A Ru1A H9A 33.6(13) . . ? 
P2A Ru1A H9A 86.3(14) . . ? 
B5A Ru1A H9A 77.2(13) . . ? 
Cl1A Ru1A H9A 177.5(13) . . ? 
Ru2A Ru1A H9A 75.2(14) . . ? 
H5A Ru1A H9A 97.0(17) . . ? 
C1A Ru2A B9A 82.18(15) . . ? 
C1A Ru2A C20A 136.48(14) . . ? 
B9A Ru2A C20A 127.44(15) . . ? 
C1A Ru2A C21A 107.86(14) . . ? 
B9A Ru2A C21A 163.22(16) . . ? 
C20A Ru2A C21A 36.72(14) . . ? 
C1A Ru2A B3A 44.26(15) . . ? 
B9A Ru2A B3A 78.79(15) . . ? 
C20A Ru2A B3A 104.66(14) . . ? 
C21A Ru2A B3A 98.80(14) . . ? 
C1A Ru2A B6A 85.98(15) . . ? 
B9A Ru2A B6A 51.26(15) . . ? 
C20A Ru2A B6A 90.76(15) . . ? 
C21A Ru2A B6A 114.79(15) . . ? 
B3A Ru2A B6A 49.46(16) . . ? 
C1A Ru2A C19A 172.84(13) . . ? 
B9A Ru2A C19A 103.54(15) . . ? 
C20A Ru2A C19A 36.40(13) . . ? 
C21A Ru2A C19A 65.57(14) . . ? 
B3A Ru2A C19A 132.01(15) . . ? 
B6A Ru2A C19A 94.25(15) . . ? 
C1A Ru2A C18A 147.54(14) . . ? 
B9A Ru2A C18A 100.92(14) . . ? 
C20A Ru2A C18A 65.98(13) . . ? 
C21A Ru2A C18A 78.02(13) . . ? 
B3A Ru2A C18A 168.20(15) . . ? 
B6A Ru2A C18A 121.36(15) . . ? 
C19A Ru2A C18A 36.36(13) . . ? 
C1A Ru2A C23A 115.49(14) . . ? 
B9A Ru2A C23A 123.42(14) . . ? 
C20A Ru2A C23A 77.16(14) . . ? 
C21A Ru2A C23A 65.17(13) . . ? 
B3A Ru2A C23A 151.35(15) . . ? 
B6A Ru2A C23A 157.96(15) . . ? 
C19A Ru2A C23A 65.11(14) . . ? 
C18A Ru2A C23A 36.77(13) . . ? 
C1A Ru2A C22A 100.28(14) . . ? 
B9A Ru2A C22A 157.93(14) . . ? 
C20A Ru2A C22A 64.71(14) . . ? 
C21A Ru2A C22A 35.70(13) . . ? 
B3A Ru2A C22A 118.29(15) . . ? 
B6A Ru2A C22A 150.38(15) . . ? 
C19A Ru2A C22A 76.08(14) . . ? 
C18A Ru2A C22A 65.37(13) . . ? 
C23A Ru2A C22A 35.93(12) . . ? 
C1A Ru2A B5A 42.38(14) . . ? 
B9A Ru2A B5A 46.53(15) . . ? 
C20A Ru2A B5A 170.87(15) . . ? 
C21A Ru2A B5A 147.93(15) . . ? 
B3A Ru2A B5A 68.57(14) . . ? 
B6A Ru2A B5A 80.18(15) . . ? 
C19A Ru2A B5A 144.69(14) . . ? 
C18A Ru2A B5A 119.83(13) . . ? 
C23A Ru2A B5A 111.77(14) . . ? 
C22A Ru2A B5A 123.55(14) . . ? 
C1A Ru2A Ru1A 91.71(10) . . ? 
B9A Ru2A Ru1A 49.10(10) . . ? 
C20A Ru2A Ru1A 131.46(10) . . ? 
C21A Ru2A Ru1A 140.81(9) . . ? 
B3A Ru2A Ru1A 118.16(11) . . ? 
B6A Ru2A Ru1A 99.81(11) . . ? 
C19A Ru2A Ru1A 95.29(9) . . ? 
C18A Ru2A Ru1A 68.18(9) . . ? 
C23A Ru2A Ru1A 75.83(9) . . ? 
C22A Ru2A Ru1A 108.83(10) . . ? 
B5A Ru2A Ru1A 52.30(10) . . ? 
C24A P1A C30A 102.65(16) . . ? 
C24A P1A C18A 103.10(17) . . ? 
C30A P1A C18A 109.40(16) . . ? 
C24A P1A Ru1A 123.46(12) . . ? 
C30A P1A Ru1A 122.40(12) . . ? 
C18A P1A Ru1A 92.96(11) . . ? 
C42A P2A C48A 104.04(16) . . ? 
C42A P2A C36A 105.38(16) . . ? 
C48A P2A C36A 99.01(15) . . ? 
C42A P2A Ru1A 109.73(11) . . ? 
C48A P2A Ru1A 124.99(12) . . ? 
C36A P2A Ru1A 111.76(12) . . ? 
B6A O1A C11A 120.4(3) . . ? 
C12A C1A B5A 127.9(3) . . ? 
C12A C1A B4A 123.6(3) . . ? 
B5A C1A B4A 70.3(2) . . ? 
C12A C1A B3A 127.3(3) . . ? 
B5A C1A B3A 104.8(3) . . ? 
B4A C1A B3A 68.4(3) . . ? 
C12A C1A Ru2A 117.0(2) . . ? 
B5A C1A Ru2A 76.28(19) . . ? 
B4A C1A Ru2A 119.2(3) . . ? 
B3A C1A Ru2A 73.38(19) . . ? 
C1A B3A B4A 55.4(2) . . ? 
C1A B3A B7A 108.2(3) . . ? 
B4A B3A B7A 57.9(2) . . ? 
C1A B3A B6A 114.1(3) . . ? 
B4A B3A B6A 103.5(3) . . ? 
B7A B3A B6A 60.4(2) . . ? 
C1A B3A Ru2A 62.36(18) . . ? 
B4A B3A Ru2A 102.8(2) . . ? 
B7A B3A Ru2A 112.7(2) . . ? 
B6A B3A Ru2A 65.51(18) . . ? 
C1A B3A H3A 116.2(17) . . ? 
B4A B3A H3A 124.0(16) . . ? 
B7A B3A H3A 121.0(16) . . ? 
B6A B3A H3A 124.3(17) . . ? 
Ru2A B3A H3A 121.4(16) . . ? 
C1A B4A B8A 109.5(3) . . ? 
C1A B4A B7A 112.0(3) . . ? 
B8A B4A B7A 60.5(3) . . ? 
C1A B4A B3A 56.2(2) . . ? 
B8A B4A B3A 102.2(3) . . ? 
B7A B4A B3A 61.4(2) . . ? 
C1A B4A B5A 54.2(2) . . ? 
B8A B4A B5A 59.7(2) . . ? 
B7A B4A B5A 101.8(3) . . ? 
B3A B4A B5A 88.1(2) . . ? 
C1A B4A H4A 110.1(17) . . ? 
B8A B4A H4A 128.7(17) . . ? 
B7A B4A H4A 127.6(16) . . ? 
B3A B4A H4A 126.7(17) . . ? 
B5A B4A H4A 127.9(17) . . ? 
C1A B5A B9A 113.3(3) . . ? 
C1A B5A B8A 108.6(3) . . ? 
B9A B5A B8A 61.0(2) . . ? 
C1A B5A B4A 55.5(2) . . ? 
B9A B5A B4A 102.0(3) . . ? 
B8A B5A B4A 57.4(2) . . ? 
C1A B5A Ru2A 61.34(17) . . ? 
B9A B5A Ru2A 64.54(18) . . ? 
B8A B5A Ru2A 111.9(2) . . ? 
B4A B5A Ru2A 100.2(2) . . ? 
C1A B5A Ru1A 132.0(2) . . ? 
B9A B5A Ru1A 63.08(17) . . ? 
B8A B5A Ru1A 108.9(2) . . ? 
B4A B5A Ru1A 164.6(3) . . ? 
Ru2A B5A Ru1A 77.42(11) . . ? 
C1A B5A H5A 128.0(19) . . ? 
B9A B5A H5A 112.8(18) . . ? 
B8A B5A H5A 113.9(18) . . ? 
B4A B5A H5A 132.7(17) . . ? 
Ru2A B5A H5A 123.0(17) . . ? 
Ru1A B5A H5A 56.9(17) . . ? 
O1A B6A B10A 123.1(4) . . ? 
O1A B6A B7A 127.6(3) . . ? 
B10A B6A B7A 56.2(2) . . ? 
O1A B6A B3A 117.5(3) . . ? 
B10A B6A B3A 108.7(3) . . ? 
B7A B6A B3A 58.7(2) . . ? 
O1A B6A B9A 141.2(3) . . ? 
B10A B6A B9A 54.5(2) . . ? 
B7A B6A B9A 85.5(3) . . ? 
B3A B6A B9A 95.9(3) . . ? 
O1A B6A Ru2A 111.7(3) . . ? 
B10A B6A Ru2A 116.9(3) . . ? 
B7A B6A Ru2A 111.0(3) . . ? 
B3A B6A Ru2A 65.02(19) . . ? 
B9A B6A Ru2A 63.56(18) . . ? 
B10A B7A B4A 112.7(3) . . ? 
B10A B7A B8A 58.0(3) . . ? 
B4A B7A B8A 59.1(2) . . ? 
B10A B7A B3A 111.7(3) . . ? 
B4A B7A B3A 60.7(2) . . ? 
B8A B7A B3A 100.8(3) . . ? 
B10A B7A B6A 57.4(2) . . ? 
B4A B7A B6A 105.9(3) . . ? 
B8A B7A B6A 92.9(3) . . ? 
B3A B7A B6A 60.9(2) . . ? 
B10A B7A H7A 122.0(19) . . ? 
B4A B7A H7A 116.7(19) . . ? 
B8A B7A H7A 132.7(19) . . ? 
B3A B7A H7A 117.7(19) . . ? 
B6A B7A H7A 128.7(19) . . ? 
B10A B8A B4A 114.6(3) . . ? 
B10A B8A B7A 58.6(3) . . ? 
B4A B8A B7A 60.5(3) . . ? 
B10A B8A B5A 112.4(3) . . ? 
B4A B8A B5A 62.8(2) . . ? 
B7A B8A B5A 104.0(3) . . ? 
B10A B8A B9A 57.4(2) . . ? 
B4A B8A B9A 104.6(3) . . ? 
B7A B8A B9A 92.0(3) . . ? 
B5A B8A B9A 59.3(2) . . ? 
B10A B8A H8A 124(2) . . ? 
B4A B8A H8A 115(2) . . ? 
B7A B8A H8A 134(2) . . ? 
B5A B8A H8A 113(2) . . ? 
B9A B8A H8A 130(2) . . ? 
B10A B9A B5A 112.9(3) . . ? 
B10A B9A B8A 57.4(2) . . ? 
B5A B9A B8A 59.8(2) . . ? 
B10A B9A B6A 56.2(2) . . ? 
B5A B9A B6A 103.8(3) . . ? 
B8A B9A B6A 89.6(3) . . ? 
B10A B9A Ru2A 120.2(3) . . ? 
B5A B9A Ru2A 68.92(19) . . ? 
B8A B9A Ru2A 114.4(3) . . ? 
B6A B9A Ru2A 65.18(18) . . ? 
B10A B9A Ru1A 157.9(3) . . ? 
B5A B9A Ru1A 71.21(19) . . ? 
B8A B9A Ru1A 114.1(2) . . ? 
B6A B9A Ru1A 145.6(3) . . ? 
Ru2A B9A Ru1A 81.88(14) . . ? 
B10A B9A H9A 116.5(19) . . ? 
B5A B9A H9A 114.9(19) . . ? 
B8A B9A H9A 122.4(18) . . ? 
B6A B9A H9A 138.4(18) . . ? 
Ru2A B9A H9A 114.5(18) . . ? 
Ru1A B9A H9A 47.7(18) . . ? 
B9A B10A B8A 65.3(3) . . ? 
B9A B10A B7A 99.7(3) . . ? 
B8A B10A B7A 63.4(3) . . ? 
B9A B10A B6A 69.3(3) . . ? 
B8A B10A B6A 101.9(3) . . ? 
B7A B10A B6A 66.4(3) . . ? 
B9A B10A H10A 134.2(19) . . ? 
B8A B10A H10A 132.6(19) . . ? 
B7A B10A H10A 126.1(19) . . ? 
B6A B10A H10A 124.9(19) . . ? 
O1A C11A H11B 109.5 . . ? 
O1A C11A H11F 109.5 . . ? 
H11B C11A H11F 109.5 . . ? 
O1A C11A H11G 109.5 . . ? 
H11B C11A H11G 109.5 . . ? 
H11F C11A H11G 109.5 . . ? 
C17A C12A C13A 118.4(4) . . ? 
C17A C12A C1A 120.9(3) . . ? 
C13A C12A C1A 120.6(3) . . ? 
C14A C13A C12A 120.5(4) . . ? 
C14A C13A H13A 119.8 . . ? 
C12A C13A H13A 119.8 . . ? 
C13A C14A C15A 120.3(4) . . ? 
C13A C14A H14A 119.9 . . ? 
C15A C14A H14A 119.9 . . ? 
C16A C15A C14A 120.1(4) . . ? 
C16A C15A H15A 119.9 . . ? 
C14A C15A H15A 119.9 . . ? 
C17A C16A C15A 119.8(4) . . ? 
C17A C16A H16A 120.1 . . ? 
C15A C16A H16A 120.1 . . ? 
C16A C17A C12A 120.9(4) . . ? 
C16A C17A H17A 119.6 . . ? 
C12A C17A H17A 119.6 . . ? 
C19A C18A C23A 118.4(3) . . ? 
C19A C18A P1A 120.1(3) . . ? 
C23A C18A P1A 118.9(3) . . ? 
C19A C18A Ru2A 71.72(19) . . ? 
C23A C18A Ru2A 72.19(19) . . ? 
P1A C18A Ru2A 111.31(15) . . ? 
C20A C19A C18A 120.8(4) . . ? 
C20A C19A Ru2A 70.6(2) . . ? 
C18A C19A Ru2A 71.9(2) . . ? 
C20A C19A H19A 119.0 . . ? 
C18A C19A H19A 119.0 . . ? 
Ru2A C19A H19A 119.0 . . ? 
C19A C20A C21A 120.3(4) . . ? 
C19A C20A Ru2A 73.0(2) . . ? 
C21A C20A Ru2A 72.1(2) . . ? 
C19A C20A H20A 119.6 . . ? 
C21A C20A H20A 119.6 . . ? 
Ru2A C20A H20A 119.6 . . ? 
C22A C21A C20A 119.7(4) . . ? 
C22A C21A Ru2A 74.1(2) . . ? 
C20A C21A Ru2A 71.1(2) . . ? 
C22A C21A H21A 119.9 . . ? 
C20A C21A H21A 119.9 . . ? 
Ru2A C21A H21A 119.9 . . ? 
C21A C22A C23A 120.8(4) . . ? 
C21A C22A Ru2A 70.2(2) . . ? 
C23A C22A Ru2A 71.5(2) . . ? 
C21A C22A H22A 118.8 . . ? 
C23A C22A H22A 118.8 . . ? 
Ru2A C22A H22A 118.8 . . ? 
C22A C23A C18A 119.9(3) . . ? 
C22A C23A Ru2A 72.6(2) . . ? 
C18A C23A Ru2A 71.04(19) . . ? 
C22A C23A H23A 119.7 . . ? 
C18A C23A H23A 119.7 . . ? 
Ru2A C23A H23A 119.7 . . ? 
C29A C24A C25A 119.0(3) . . ? 
C29A C24A P1A 122.0(3) . . ? 
C25A C24A P1A 118.9(3) . . ? 
C26A C25A C24A 120.5(3) . . ? 
C26A C25A H25B 119.7 . . ? 
C24A C25A H25B 119.7 . . ? 
C27A C26A C25A 120.1(3) . . ? 
C27A C26A H26A 120.0 . . ? 
C25A C26A H26A 120.0 . . ? 
C26A C27A C28A 120.1(4) . . ? 
C26A C27A H27B 120.0 . . ? 
C28A C27A H27B 120.0 . . ? 
C27A C28A C29A 120.4(4) . . ? 
C27A C28A H28A 119.8 . . ? 
C29A C28A H28A 119.8 . . ? 
C24A C29A C28A 119.9(3) . . ? 
C24A C29A H29A 120.1 . . ? 
C28A C29A H29A 120.1 . . ? 
C31A C30A C35A 118.4(3) . . ? 
C31A C30A P1A 124.0(3) . . ? 
C35A C30A P1A 117.6(3) . . ? 
C30A C31A C32A 119.7(3) . . ? 
C30A C31A H31A 120.2 . . ? 
C32A C31A H31A 120.2 . . ? 
C33A C32A C31A 121.0(4) . . ? 
C33A C32A H32A 119.5 . . ? 
C31A C32A H32A 119.5 . . ? 
C32A C33A C34A 120.1(3) . . ? 
C32A C33A H33A 120.0 . . ? 
C34A C33A H33A 120.0 . . ? 
C35A C34A C33A 119.1(4) . . ? 
C35A C34A H34A 120.5 . . ? 
C33A C34A H34A 120.5 . . ? 
C34A C35A C30A 121.8(4) . . ? 
C34A C35A H35A 119.1 . . ? 
C30A C35A H35A 119.1 . . ? 
C41A C36A C37A 119.1(3) . . ? 
C41A C36A P2A 118.2(3) . . ? 
C37A C36A P2A 122.3(3) . . ? 
C36A C37A C38A 119.8(4) . . ? 
C36A C37A H37A 120.1 . . ? 
C38A C37A H37A 120.1 . . ? 
C39A C38A C37A 120.0(4) . . ? 
C39A C38A H38B 120.0 . . ? 
C37A C38A H38B 120.0 . . ? 
C40A C39A C38A 119.6(3) . . ? 
C40A C39A H39A 120.2 . . ? 
C38A C39A H39A 120.2 . . ? 
C39A C40A C41A 120.5(4) . . ? 
C39A C40A H40A 119.7 . . ? 
C41A C40A H40A 119.7 . . ? 
C36A C41A C40A 120.8(3) . . ? 
C36A C41A H41A 119.6 . . ? 
C40A C41A H41A 119.6 . . ? 
C43A C42A C47A 118.4(3) . . ? 
C43A C42A P2A 123.2(3) . . ? 
C47A C42A P2A 117.9(3) . . ? 
C44A C43A C42A 120.4(3) . . ? 
C44A C43A H43A 119.8 . . ? 
C42A C43A H43A 119.8 . . ? 
C43A C44A C45A 120.3(4) . . ? 
C43A C44A H44A 119.9 . . ? 
C45A C44A H44A 119.9 . . ? 
C46A C45A C44A 119.8(4) . . ? 
C46A C45A H45A 120.1 . . ? 
C44A C45A H45A 120.1 . . ? 
C45A C46A C47A 120.0(4) . . ? 
C45A C46A H46A 120.0 . . ? 
C47A C46A H46A 120.0 . . ? 
C46A C47A C42A 121.0(4) . . ? 
C46A C47A H47B 119.5 . . ? 
C42A C47A H47B 119.5 . . ? 
C49A C48A C53A 119.1(3) . . ? 
C49A C48A P2A 121.0(3) . . ? 
C53A C48A P2A 119.7(3) . . ? 
C48A C49A C50A 119.6(4) . . ? 
C48A C49A H49A 120.2 . . ? 
C50A C49A H49A 120.2 . . ? 
C51A C50A C49A 120.6(4) . . ? 
C51A C50A H50A 119.7 . . ? 
C49A C50A H50A 119.7 . . ? 
C52A C51A C50A 120.1(3) . . ? 
C52A C51A H51A 119.9 . . ? 
C50A C51A H51A 119.9 . . ? 
C51A C52A C53A 119.9(4) . . ? 
C51A C52A H52A 120.0 . . ? 
C53A C52A H52A 120.0 . . ? 
C52A C53A C48A 120.6(4) . . ? 
C52A C53A H53D 119.7 . . ? 
C48A C53A H53D 119.7 . . ? 
P1B Ru1B B9B 100.17(11) . . ? 
P1B Ru1B P2B 105.03(4) . . ? 
B9B Ru1B P2B 111.49(11) . . ? 
P1B Ru1B B5B 131.82(10) . . ? 
B9B Ru1B B5B 46.27(14) . . ? 
P2B Ru1B B5B 118.39(10) . . ? 
P1B Ru1B Cl1B 94.10(4) . . ? 
B9B Ru1B Cl1B 145.72(11) . . ? 
P2B Ru1B Cl1B 94.33(3) . . ? 
B5B Ru1B Cl1B 102.01(10) . . ? 
P1B Ru1B Ru2B 81.84(3) . . ? 
B9B Ru1B Ru2B 49.53(10) . . ? 
P2B Ru1B Ru2B 161.01(3) . . ? 
B5B Ru1B Ru2B 50.46(9) . . ? 
Cl1B Ru1B Ru2B 102.92(3) . . ? 
P1B Ru1B H5B 155.2(8) . . ? 
B9B Ru1B H5B 74.7(8) . . ? 
P2B Ru1B H5B 99.4(8) . . ? 
B5B Ru1B H5B 31.2(8) . . ? 
Cl1B Ru1B H5B 79.3(9) . . ? 
Ru2B Ru1B H5B 76.5(8) . . ? 
P1B Ru1B H9B 84.4(15) . . ? 
B9B Ru1B H9B 32.4(15) . . ? 
P2B Ru1B H9B 88.8(15) . . ? 
B5B Ru1B H9B 77.0(15) . . ? 
Cl1B Ru1B H9B 176.8(15) . . ? 
Ru2B Ru1B H9B 74.1(15) . . ? 
H5B Ru1B H9B 100.9(17) . . ? 
C1B Ru2B C20B 136.49(13) . . ? 
C1B Ru2B B3B 44.40(13) . . ? 
C20B Ru2B B3B 103.00(13) . . ? 
C1B Ru2B B9B 82.58(14) . . ? 
C20B Ru2B B9B 124.79(14) . . ? 
B3B Ru2B B9B 78.98(15) . . ? 
C1B Ru2B B6B 86.76(14) . . ? 
C20B Ru2B B6B 87.98(14) . . ? 
B3B Ru2B B6B 50.33(15) . . ? 
B9B Ru2B B6B 50.61(14) . . ? 
C1B Ru2B C21B 109.11(13) . . ? 
C20B Ru2B C21B 36.64(13) . . ? 
B3B Ru2B C21B 98.31(14) . . ? 
B9B Ru2B C21B 160.58(14) . . ? 
B6B Ru2B C21B 113.10(14) . . ? 
C1B Ru2B C19B 173.20(12) . . ? 
C20B Ru2B C19B 36.92(12) . . ? 
B3B Ru2B C19B 130.17(13) . . ? 
B9B Ru2B C19B 100.87(14) . . ? 
B6B Ru2B C19B 90.92(14) . . ? 
C21B Ru2B C19B 65.99(13) . . ? 
C1B Ru2B C18B 148.88(12) . . ? 
C20B Ru2B C18B 66.68(12) . . ? 
B3B Ru2B C18B 166.68(13) . . ? 
B9B Ru2B C18B 99.68(13) . . ? 
B6B Ru2B C18B 118.81(14) . . ? 
C21B Ru2B C18B 78.48(13) . . ? 
C19B Ru2B C18B 36.74(12) . . ? 
C1B Ru2B C23B 117.43(13) . . ? 
C20B Ru2B C23B 77.60(13) . . ? 
B3B Ru2B C23B 152.41(14) . . ? 
B9B Ru2B C23B 123.85(13) . . ? 
B6B Ru2B C23B 155.36(14) . . ? 
C21B Ru2B C23B 65.39(13) . . ? 
C19B Ru2B C23B 65.57(13) . . ? 
C18B Ru2B C23B 36.91(13) . . ? 
C1B Ru2B B5B 42.40(13) . . ? 
C20B Ru2B B5B 168.29(14) . . ? 
B3B Ru2B B5B 68.68(14) . . ? 
B9B Ru2B B5B 46.94(15) . . ? 
B6B Ru2B B5B 80.36(15) . . ? 
C21B Ru2B B5B 149.73(14) . . ? 
C19B Ru2B B5B 143.33(14) . . ? 
C18B Ru2B B5B 120.07(13) . . ? 
C23B Ru2B B5B 113.67(13) . . ? 
C1B Ru2B C22B 102.37(13) . . ? 
C20B Ru2B C22B 65.10(13) . . ? 
B3B Ru2B C22B 119.15(14) . . ? 
B9B Ru2B C22B 158.68(13) . . ? 
B6B Ru2B C22B 149.30(14) . . ? 
C21B Ru2B C22B 36.19(13) . . ? 
C19B Ru2B C22B 76.55(13) . . ? 
C18B Ru2B C22B 65.37(13) . . ? 
C23B Ru2B C22B 35.61(12) . . ? 
B5B Ru2B C22B 125.81(14) . . ? 
C1B Ru2B Ru1B 91.48(9) . . ? 
C20B Ru2B Ru1B 131.95(9) . . ? 
B3B Ru2B Ru1B 118.30(10) . . ? 
B9B Ru2B Ru1B 49.54(10) . . ? 
B6B Ru2B Ru1B 99.60(10) . . ? 
C21B Ru2B Ru1B 141.70(9) . . ? 
C19B Ru2B Ru1B 95.22(9) . . ? 
C18B Ru2B Ru1B 68.25(8) . . ? 
C23B Ru2B Ru1B 76.53(9) . . ? 
B5B Ru2B Ru1B 52.19(10) . . ? 
C22B Ru2B Ru1B 109.26(9) . . ? 
C24B P1B C30B 101.33(16) . . ? 
C24B P1B C18B 105.20(16) . . ? 
C30B P1B C18B 108.37(17) . . ? 
C24B P1B Ru1B 123.46(12) . . ? 
C30B P1B Ru1B 123.60(11) . . ? 
C18B P1B Ru1B 92.26(11) . . ? 
C42B P2B C48B 103.76(16) . . ? 
C42B P2B C36B 103.23(16) . . ? 
C48B P2B C36B 100.16(15) . . ? 
C42B P2B Ru1B 112.54(11) . . ? 
C48B P2B Ru1B 123.18(13) . . ? 
C36B P2B Ru1B 111.62(11) . . ? 
B6B O1B C11B 118.5(3) . . ? 
C12B C1B B5B 129.1(3) . . ? 
C12B C1B B4B 118.3(3) . . ? 
B5B C1B B4B 70.3(2) . . ? 
C12B C1B B3B 126.1(3) . . ? 
B5B C1B B3B 104.1(3) . . ? 
B4B C1B B3B 68.0(2) . . ? 
C12B C1B Ru2B 123.8(2) . . ? 
B5B C1B Ru2B 75.45(19) . . ? 
B4B C1B Ru2B 117.7(2) . . ? 
B3B C1B Ru2B 72.34(18) . . ? 
C1B B3B B4B 55.5(2) . . ? 
C1B B3B B7B 108.9(3) . . ? 
B4B B3B B7B 58.5(2) . . ? 
C1B B3B B6B 114.3(3) . . ? 
B4B B3B B6B 102.7(3) . . ? 
B7B B3B B6B 59.1(2) . . ? 
C1B B3B Ru2B 63.26(17) . . ? 
B4B B3B Ru2B 103.1(2) . . ? 
B7B B3B Ru2B 112.0(2) . . ? 
B6B B3B Ru2B 65.15(17) . . ? 
C1B B3B H3B 119.5(17) . . ? 
B4B B3B H3B 124.8(17) . . ? 
B7B B3B H3B 117.5(17) . . ? 
B6B B3B H3B 121.8(17) . . ? 
Ru2B B3B H3B 123.5(17) . . ? 
C1B B4B B8B 110.7(3) . . ? 
C1B B4B B7B 112.1(3) . . ? 
B8B B4B B7B 60.9(2) . . ? 
C1B B4B B3B 56.5(2) . . ? 
B8B B4B B3B 103.1(3) . . ? 
B7B B4B B3B 61.0(2) . . ? 
C1B B4B B5B 54.2(2) . . ? 
B8B B4B B5B 60.5(2) . . ? 
B7B B4B B5B 101.8(3) . . ? 
B3B B4B B5B 88.0(2) . . ? 
C1B B4B H4B 117.2(18) . . ? 
B8B B4B H4B 124.6(17) . . ? 
B7B B4B H4B 119.0(17) . . ? 
B3B B4B H4B 125.6(17) . . ? 
B5B B4B H4B 135.6(17) . . ? 
C1B B5B B9B 114.2(3) . . ? 
C1B B5B B8B 109.0(3) . . ? 
B9B B5B B8B 60.3(2) . . ? 
C1B B5B B4B 55.5(2) . . ? 
B9B B5B B4B 101.1(3) . . ? 
B8B B5B B4B 57.4(2) . . ? 
C1B B5B Ru2B 62.15(17) . . ? 
B9B B5B Ru2B 64.83(18) . . ? 
B8B B5B Ru2B 111.8(2) . . ? 
B4B B5B Ru2B 100.0(2) . . ? 
C1B B5B Ru1B 132.3(2) . . ? 
B9B B5B Ru1B 63.54(18) . . ? 
B8B B5B Ru1B 108.8(2) . . ? 
B4B B5B Ru1B 164.2(3) . . ? 
Ru2B B5B Ru1B 77.35(12) . . ? 
C1B B5B H5B 123.3(15) . . ? 
B9B B5B H5B 117.1(15) . . ? 
B8B B5B H5B 116.2(15) . . ? 
B4B B5B H5B 130.8(15) . . ? 
Ru2B B5B H5B 123.2(14) . . ? 
Ru1B B5B H5B 60.0(14) . . ? 
O1B B6B B10B 122.3(3) . . ? 
O1B B6B B7B 127.2(3) . . ? 
B10B B6B B7B 57.2(2) . . ? 
O1B B6B B3B 118.1(3) . . ? 
B10B B6B B3B 109.3(3) . . ? 
B7B B6B B3B 58.5(2) . . ? 
O1B B6B B9B 140.7(3) . . ? 
B10B B6B B9B 54.1(2) . . ? 
B7B B6B B9B 86.1(2) . . ? 
B3B B6B B9B 96.1(2) . . ? 
O1B B6B Ru2B 111.7(3) . . ? 
B10B B6B Ru2B 117.4(2) . . ? 
B7B B6B Ru2B 111.0(2) . . ? 
B3B B6B Ru2B 64.52(18) . . ? 
B9B B6B Ru2B 64.38(17) . . ? 
B10B B7B B4B 112.3(3) . . ? 
B10B B7B B8B 57.4(2) . . ? 
B4B B7B B8B 59.0(2) . . ? 
B10B B7B B3B 113.2(3) . . ? 
B4B B7B B3B 60.5(2) . . ? 
B8B B7B B3B 101.4(3) . . ? 
B10B B7B B6B 57.8(2) . . ? 
B4B B7B B6B 106.6(3) . . ? 
B8B B7B B6B 93.3(3) . . ? 
B3B B7B B6B 62.4(2) . . ? 
B10B B7B H7B 124(2) . . ? 
B4B B7B H7B 115(2) . . ? 
B8B B7B H7B 132.8(19) . . ? 
B3B B7B H7B 115(2) . . ? 
B6B B7B H7B 129.0(19) . . ? 
B10B B8B B4B 114.4(3) . . ? 
B10B B8B B7B 58.7(2) . . ? 
B4B B8B B7B 60.1(2) . . ? 
B10B B8B B9B 56.5(2) . . ? 
B4B B8B B9B 103.8(3) . . ? 
B7B B8B B9B 90.3(3) . . ? 
B10B B8B B5B 111.7(3) . . ? 
B4B B8B B5B 62.1(2) . . ? 
B7B B8B B5B 102.3(3) . . ? 
B9B B8B B5B 59.3(2) . . ? 
B10B B8B H8B 123(2) . . ? 
B4B B8B H8B 116(2) . . ? 
B7B B8B H8B 135(2) . . ? 
B9B B8B H8B 130(2) . . ? 
B5B B8B H8B 115(2) . . ? 
B10B B9B B5B 113.9(3) . . ? 
B10B B9B B8B 57.7(2) . . ? 
B5B B9B B8B 60.4(2) . . ? 
B10B B9B B6B 57.0(2) . . ? 
B5B B9B B6B 103.8(3) . . ? 
B8B B9B B6B 90.3(2) . . ? 
B10B B9B Ru1B 158.2(3) . . ? 
B5B B9B Ru1B 70.19(19) . . ? 
B8B B9B Ru1B 113.8(2) . . ? 
B6B B9B Ru1B 144.5(3) . . ? 
B10B B9B Ru2B 120.8(2) . . ? 
B5B B9B Ru2B 68.22(18) . . ? 
B8B B9B Ru2B 114.6(2) . . ? 
B6B B9B Ru2B 65.01(18) . . ? 
Ru1B B9B Ru2B 80.94(14) . . ? 
B10B B9B H9B 122.6(19) . . ? 
B5B B9B H9B 109.3(19) . . ? 
B8B B9B H9B 123.9(19) . . ? 
B6B B9B H9B 140.8(19) . . ? 
Ru1B B9B H9B 42.0(19) . . ? 
Ru2B B9B H9B 109.1(19) . . ? 
B9B B10B B8B 65.8(3) . . ? 
B9B B10B B7B 99.0(3) . . ? 
B8B B10B B7B 63.9(2) . . ? 
B9B B10B B6B 68.8(3) . . ? 
B8B B10B B6B 102.0(3) . . ? 
B7B B10B B6B 65.0(3) . . ? 
B9B B10B H10B 133.3(17) . . ? 
B8B B10B H10B 130.6(17) . . ? 
B7B B10B H10B 127.8(17) . . ? 
B6B B10B H10B 126.9(16) . . ? 
O1B C11B H11A 109.5 . . ? 
O1B C11B H11C 109.5 . . ? 
H11A C11B H11C 109.5 . . ? 
O1B C11B H11D 109.5 . . ? 
H11A C11B H11D 109.5 . . ? 
H11C C11B H11D 109.5 . . ? 
C13B C12B C17B 117.9(3) . . ? 
C13B C12B C1B 120.7(3) . . ? 
C17B C12B C1B 121.4(3) . . ? 
C14B C13B C12B 121.3(4) . . ? 
C14B C13B H13B 119.3 . . ? 
C12B C13B H13B 119.3 . . ? 
C15B C14B C13B 120.1(4) . . ? 
C15B C14B H14B 119.9 . . ? 
C13B C14B H14B 119.9 . . ? 
C14B C15B C16B 119.6(4) . . ? 
C14B C15B H15B 120.2 . . ? 
C16B C15B H15B 120.2 . . ? 
C17B C16B C15B 120.5(4) . . ? 
C17B C16B H16B 119.7 . . ? 
C15B C16B H16B 119.7 . . ? 
C16B C17B C12B 120.4(3) . . ? 
C16B C17B H17B 119.8 . . ? 
C12B C17B H17B 119.8 . . ? 
C19B C18B C23B 117.9(3) . . ? 
C19B C18B P1B 119.7(3) . . ? 
C23B C18B P1B 119.7(2) . . ? 
C19B C18B Ru2B 71.29(18) . . ? 
C23B C18B Ru2B 71.72(19) . . ? 
P1B C18B Ru2B 111.98(16) . . ? 
C20B C19B C18B 120.2(3) . . ? 
C20B C19B Ru2B 70.08(19) . . ? 
C18B C19B Ru2B 71.97(19) . . ? 
C20B C19B H19B 119.2 . . ? 
C18B C19B H19B 119.2 . . ? 
Ru2B C19B H19B 119.2 . . ? 
C21B C20B C19B 120.9(3) . . ? 
C21B C20B Ru2B 72.99(19) . . ? 
C19B C20B Ru2B 73.00(19) . . ? 
C21B C20B H20B 119.3 . . ? 
C19B C20B H20B 119.3 . . ? 
Ru2B C20B H20B 119.3 . . ? 
C20B C21B C22B 119.2(3) . . ? 
C20B C21B Ru2B 70.4(2) . . ? 
C22B C21B Ru2B 73.7(2) . . ? 
C20B C21B H21B 120.1 . . ? 
C22B C21B H21B 120.1 . . ? 
Ru2B C21B H21B 120.1 . . ? 
C23B C22B C21B 120.6(4) . . ? 
C23B C22B Ru2B 71.0(2) . . ? 
C21B C22B Ru2B 70.1(2) . . ? 
C23B C22B H22B 118.8 . . ? 
C21B C22B H22B 118.8 . . ? 
Ru2B C22B H22B 118.8 . . ? 
C22B C23B C18B 121.0(3) . . ? 
C22B C23B Ru2B 73.4(2) . . ? 
C18B C23B Ru2B 71.4(2) . . ? 
C22B C23B H23B 119.1 . . ? 
C18B C23B H23B 119.1 . . ? 
Ru2B C23B H23B 119.1 . . ? 
C29B C24B C25B 118.7(3) . . ? 
C29B C24B P1B 120.5(3) . . ? 
C25B C24B P1B 120.8(3) . . ? 
C24B C25B C26B 120.8(4) . . ? 
C24B C25B H25A 119.6 . . ? 
C26B C25B H25A 119.6 . . ? 
C27B C26B C25B 119.9(4) . . ? 
C27B C26B H26B 120.1 . . ? 
C25B C26B H26B 120.1 . . ? 
C26B C27B C28B 120.7(4) . . ? 
C26B C27B H27A 119.6 . . ? 
C28B C27B H27A 119.6 . . ? 
C27B C28B C29B 119.4(4) . . ? 
C27B C28B H28B 120.3 . . ? 
C29B C28B H28B 120.3 . . ? 
C24B C29B C28B 120.5(4) . . ? 
C24B C29B H29B 119.7 . . ? 
C28B C29B H29B 119.7 . . ? 
C31B C30B C35B 119.3(3) . . ? 
C31B C30B P1B 123.0(3) . . ? 
C35B C30B P1B 117.6(3) . . ? 
C32B C31B C30B 119.5(4) . . ? 
C32B C31B H31B 120.2 . . ? 
C30B C31B H31B 120.2 . . ? 
C33B C32B C31B 121.0(4) . . ? 
C33B C32B H32B 119.5 . . ? 
C31B C32B H32B 119.5 . . ? 
C34B C33B C32B 120.0(4) . . ? 
C34B C33B H33B 120.0 . . ? 
C32B C33B H33B 120.0 . . ? 
C33B C34B C35B 120.1(4) . . ? 
C33B C34B H34B 119.9 . . ? 
C35B C34B H34B 119.9 . . ? 
C30B C35B C34B 120.0(4) . . ? 
C30B C35B H35B 120.0 . . ? 
C34B C35B H35B 120.0 . . ? 
C41B C36B C37B 118.7(3) . . ? 
C41B C36B P2B 118.3(3) . . ? 
C37B C36B P2B 122.9(3) . . ? 
C36B C37B C38B 120.0(4) . . ? 
C36B C37B H37B 120.0 . . ? 
C38B C37B H37B 120.0 . . ? 
C39B C38B C37B 120.8(4) . . ? 
C39B C38B H38A 119.6 . . ? 
C37B C38B H38A 119.6 . . ? 
C40B C39B C38B 118.8(4) . . ? 
C40B C39B H39B 120.6 . . ? 
C38B C39B H39B 120.6 . . ? 
C39B C40B C41B 121.0(4) . . ? 
C39B C40B H40B 119.5 . . ? 
C41B C40B H40B 119.5 . . ? 
C36B C41B C40B 120.7(4) . . ? 
C36B C41B H41B 119.6 . . ? 
C40B C41B H41B 119.6 . . ? 
C43B C42B C47B 118.2(3) . . ? 
C43B C42B P2B 123.2(3) . . ? 
C47B C42B P2B 118.4(3) . . ? 
C44B C43B C42B 121.0(4) . . ? 
C44B C43B H43B 119.5 . . ? 
C42B C43B H43B 119.5 . . ? 
C43B C44B C45B 120.3(4) . . ? 
C43B C44B H44B 119.8 . . ? 
C45B C44B H44B 119.8 . . ? 
C46B C45B C44B 119.1(4) . . ? 
C46B C45B H45B 120.5 . . ? 
C44B C45B H45B 120.5 . . ? 
C47B C46B C45B 121.0(4) . . ? 
C47B C46B H46B 119.5 . . ? 
C45B C46B H46B 119.5 . . ? 
C46B C47B C42B 120.3(4) . . ? 
C46B C47B H47A 119.8 . . ? 
C42B C47B H47A 119.8 . . ? 
C49B C48B C53B 118.8(3) . . ? 
C49B C48B P2B 122.2(3) . . ? 
C53B C48B P2B 119.0(3) . . ? 
C48B C49B C50B 120.9(4) . . ? 
C48B C49B H49B 119.6 . . ? 
C50B C49B H49B 119.6 . . ? 
C51B C50B C49B 120.0(4) . . ? 
C51B C50B H50B 120.0 . . ? 
C49B C50B H50B 120.0 . . ? 
C50B C51B C52B 119.7(4) . . ? 
C50B C51B H51B 120.2 . . ? 
C52B C51B H51B 120.2 . . ? 
C53B C52B C51B 120.5(4) . . ? 
C53B C52B H52B 119.8 . . ? 
C51B C52B H52B 119.8 . . ? 
C52B C53B C48B 120.2(4) . . ? 
C52B C53B H53A 119.9 . . ? 
C48B C53B H53A 119.9 . . ? 
  
_refine_diff_density_max    1.792 
_refine_diff_density_min   -0.643 
_refine_diff_density_rms    0.126 
  
_shelx_res_file 
; 
  
    igrum.res created by SHELXL-2014/7 
  
  
TITL igrum in P-1 
CELL 0.71073  10.5600  20.2052  22.3519 114.814 101.570  90.753 
ZERR    4.00   0.0021   0.0039   0.0043   0.004   0.004   0.004 
LATT  1 
SFAC C H B P CL RU O 
UNIT 176 180 32 8 4 8 4 
TEMP -153.0 
  
size 0.46 0.32 0.18 
  
ACTA 
  
omit -4 58 
  
OMIT     0   1   0 
OMIT     0   0   1 
OMIT     0  -1   1 
omit     0  -5   2 
  
L.S. 8 
BOND $H 
FMAP 2 
PLAN 120 
  
WGHT    0.030000    4.000000 
FVAR       0.10881 
RU1A  6    0.104039    0.280722    0.771778    11.00000    0.01876    0.01785 = 
         0.01724    0.00669    0.00428    0.00028 
RU2A  6    0.035962    0.152619    0.640426    11.00000    0.02557    0.01804 = 
         0.01853    0.00635    0.00445   -0.00210 
CL1A  5   -0.105251    0.318306    0.792968    11.00000    0.01764    0.02747 = 
         0.02245    0.00900    0.00461    0.00217 
P1A   4    0.101166    0.194101    0.808419    11.00000    0.02203    0.01848 = 
         0.01873    0.00726    0.00541    0.00076 
P2A   4    0.222139    0.376047    0.865691    11.00000    0.01955    0.01852 = 
         0.01854    0.00669    0.00441    0.00103 
O1A   7    0.267784    0.075382    0.589780    11.00000    0.03717    0.02954 = 
         0.03858    0.00924    0.01224    0.00619 
C1A   1   -0.008063    0.218493    0.589795    11.00000    0.03172    0.02188 = 
         0.01833    0.00925    0.00759    0.00313 
B3A   3    0.089493    0.161328    0.551167    11.00000    0.03518    0.01880 = 
         0.02151    0.00753    0.00318   -0.00182 
H3A   2    0.047032    0.120845    0.498932    11.00000    0.01236 
B4A   3    0.109718    0.260825    0.578018    11.00000    0.03383    0.02325 = 
         0.01892    0.00749    0.00809   -0.00296 
H4A   2    0.071466    0.289255    0.548846    11.00000    0.00875 
B5A   3    0.081797    0.273268    0.661329    11.00000    0.02539    0.01869 = 
         0.02064    0.00917    0.00481   -0.00159 
H5A   2    0.053285    0.319820    0.702890    11.00000    0.02380 
B6A   3    0.228982    0.146376    0.610178    11.00000    0.02577    0.02787 = 
         0.02329    0.00443    0.00656    0.00069 
B7A   3    0.250829    0.212898    0.573364    11.00000    0.03251    0.02578 = 
         0.02509    0.00602    0.01213   -0.00134 
H7A   2    0.296394    0.206483    0.533227    11.00000    0.02310 
B8A   3    0.240557    0.290368    0.649182    11.00000    0.03468    0.03050 = 
         0.02555    0.01513    0.01560    0.00693 
H8A   2    0.275296    0.349142    0.671260    11.00000    0.03345 
B9A   3    0.214976    0.232310    0.690920    11.00000    0.02968    0.02511 = 
         0.01723    0.00779    0.00559    0.00151 
H9A   2    0.246731    0.254718    0.753810    11.00000    0.04436 
B10A  3    0.337675    0.224936    0.650842    11.00000    0.02820    0.02983 = 
         0.02869    0.01060    0.01164    0.00242 
H10A  2    0.444170    0.226028    0.665751    11.00000    0.02783 
C11A  1    0.402208    0.064404    0.592397    11.00000    0.03361    0.04353 = 
         0.05854    0.01602    0.00531    0.01465 
AFIX 137 
H11B  2    0.409371    0.013034    0.563381    11.00000   -1.50000 
H11F  2    0.447286    0.076434    0.639109    11.00000   -1.50000 
H11G  2    0.441896    0.096238    0.576490    11.00000   -1.50000 
AFIX   0 
C12A  1   -0.147689    0.220306    0.562847    11.00000    0.03048    0.02603 = 
         0.02225    0.01220    0.00525   -0.00222 
C13A  1   -0.206126    0.177113    0.494736    11.00000    0.03512    0.04811 = 
         0.02810    0.01214    0.00464   -0.00108 
AFIX  43 
H13A  2   -0.154608    0.149361    0.464584    11.00000   -1.20000 
AFIX   0 
C14A  1   -0.337101    0.174501    0.471141    11.00000    0.03701    0.05576 = 
         0.03400    0.01569   -0.00166   -0.00442 
AFIX  43 
H14A  2   -0.376158    0.144334    0.424933    11.00000   -1.20000 
AFIX   0 
C15A  1   -0.412663    0.215580    0.514292    11.00000    0.02335    0.05350 = 
         0.05571    0.02899   -0.00561   -0.00292 
AFIX  43 
H15A  2   -0.503372    0.213821    0.497619    11.00000   -1.20000 
AFIX   0 
C16A  1   -0.356657    0.259087    0.581459    11.00000    0.03406    0.05039 = 
         0.04362    0.02215    0.01000    0.01191 
AFIX  43 
H16A  2   -0.408761    0.287011    0.611176    11.00000   -1.20000 
AFIX   0 
C17A  1   -0.225222    0.261985    0.605356    11.00000    0.03266    0.03219 = 
         0.02941    0.01298    0.00099    0.00308 
AFIX  43 
H17A  2   -0.186732    0.292826    0.651482    11.00000   -1.20000 
AFIX   0 
C18A  1    0.008563    0.124869    0.725665    11.00000    0.02935    0.02400 = 
         0.02064    0.01119    0.00645   -0.00496 
C19A  1    0.071915    0.069032    0.683100    11.00000    0.04003    0.01741 = 
         0.02591    0.00981    0.00924   -0.00339 
AFIX  13 
H19A  2    0.163485    0.063166    0.701276    11.00000   -1.20000 
AFIX   0 
C20A  1    0.019346    0.032540    0.613040    11.00000    0.04084    0.01933 = 
         0.02613    0.00852    0.00824   -0.00298 
AFIX  13 
H20A  2    0.073020    0.000247    0.582673    11.00000   -1.20000 
AFIX   0 
C21A  1   -0.101012    0.048799    0.584491    11.00000    0.04274    0.02320 = 
         0.02248    0.00961    0.00578   -0.01023 
AFIX  13 
H21A  2   -0.131942    0.028101    0.534193    11.00000   -1.20000 
AFIX   0 
C22A  1   -0.168877    0.100378    0.626240    11.00000    0.02765    0.02482 = 
         0.03096    0.01424    0.00315   -0.00892 
AFIX  13 
H22A  2   -0.245548    0.117837    0.604965    11.00000   -1.20000 
AFIX   0 
C23A  1   -0.114821    0.140082    0.696288    11.00000    0.02683    0.02156 = 
         0.02857    0.01317    0.00534   -0.00461 
AFIX  13 
H23A  2   -0.154905    0.184058    0.723627    11.00000   -1.20000 
AFIX   0 
C24A  1    0.243798    0.149735    0.826126    11.00000    0.02438    0.02072 = 
         0.01944    0.00649    0.00267    0.00425 
C25A  1    0.231673    0.096162    0.849652    11.00000    0.02330    0.03093 = 
         0.02785    0.01395    0.00924    0.00556 
AFIX  43 
H25B  2    0.151542    0.086017    0.858927    11.00000   -1.20000 
AFIX   0 
C26A  1    0.335474    0.057969    0.859461    11.00000    0.03853    0.02721 = 
         0.03121    0.01614    0.00615    0.00539 
AFIX  43 
H26A  2    0.326279    0.021574    0.875185    11.00000   -1.20000 
AFIX   0 
C27A  1    0.451687    0.072582    0.846510    11.00000    0.03455    0.02745 = 
         0.03429    0.01477    0.00971    0.01485 
AFIX  43 
H27B  2    0.522909    0.046335    0.853333    11.00000   -1.20000 
AFIX   0 
C28A  1    0.465338    0.125580    0.823487    11.00000    0.02496    0.03377 = 
         0.04715    0.01765    0.01639    0.00875 
AFIX  43 
H28A  2    0.546040    0.135549    0.814638    11.00000   -1.20000 
AFIX   0 
C29A  1    0.361715    0.164247    0.813258    11.00000    0.02656    0.02298 = 
         0.03393    0.01404    0.01036    0.00640 
AFIX  43 
H29A  2    0.371630    0.200535    0.797488    11.00000   -1.20000 
AFIX   0 
C30A  1    0.016899    0.200381    0.874025    11.00000    0.02520    0.02247 = 
         0.02158    0.01120    0.00709    0.00448 
C31A  1   -0.112198    0.172365    0.861007    11.00000    0.02499    0.02422 = 
         0.02420    0.01228    0.00307    0.00123 
AFIX  43 
H31A  2   -0.161513    0.147661    0.815724    11.00000   -1.20000 
AFIX   0 
C32A  1   -0.168723    0.180814    0.914950    11.00000    0.02505    0.03262 = 
         0.04063    0.02156    0.01325    0.00801 
AFIX  43 
H32A  2   -0.256524    0.161462    0.905929    11.00000   -1.20000 
AFIX   0 
C33A  1   -0.099233    0.216620    0.980643    11.00000    0.04768    0.03212 = 
         0.02771    0.01891    0.01577    0.01387 
AFIX  43 
H33A  2   -0.139195    0.222287    1.016740    11.00000   -1.20000 
AFIX   0 
C34A  1    0.029838    0.244675    0.994484    11.00000    0.04151    0.02971 = 
         0.02121    0.01145    0.00317    0.00586 
AFIX  43 
H34A  2    0.078552    0.269474    1.039884    11.00000   -1.20000 
AFIX   0 
C35A  1    0.086193    0.235931    0.941178    11.00000    0.02393    0.02672 = 
         0.02418    0.00958    0.00306    0.00135 
AFIX  43 
H35A  2    0.174512    0.254661    0.950590    11.00000   -1.20000 
AFIX   0 
C36A  1    0.226171    0.461304    0.854702    11.00000    0.02563    0.01769 = 
         0.02171    0.00786    0.00894    0.00385 
C37A  1    0.336151    0.512387    0.881861    11.00000    0.02837    0.02839 = 
         0.03206    0.01181    0.00683    0.00235 
AFIX  43 
H37A  2    0.416193    0.500836    0.901413    11.00000   -1.20000 
AFIX   0 
C38A  1    0.328346    0.581109    0.880253    11.00000    0.03170    0.02358 = 
         0.03849    0.01015    0.01083   -0.00335 
AFIX  43 
H38B  2    0.403434    0.615793    0.898248    11.00000   -1.20000 
AFIX   0 
C39A  1    0.211442    0.598176    0.852493    11.00000    0.04260    0.02250 = 
         0.03889    0.01690    0.01384    0.00656 
AFIX  43 
H39A  2    0.205307    0.645064    0.852543    11.00000   -1.20000 
AFIX   0 
C40A  1    0.103980    0.546844    0.824780    11.00000    0.03091    0.03260 = 
         0.03986    0.02081    0.00914    0.00914 
AFIX  43 
H40A  2    0.023706    0.558383    0.805446    11.00000   -1.20000 
AFIX   0 
C41A  1    0.111956    0.478393    0.824856    11.00000    0.02527    0.02460 = 
         0.02805    0.01110    0.00530    0.00034 
AFIX  43 
H41A  2    0.037853    0.442889    0.804101    11.00000   -1.20000 
AFIX   0 
C42A  1    0.392055    0.357465    0.880949    11.00000    0.02284    0.01309 = 
         0.02768    0.00580    0.00096   -0.00022 
C43A  1    0.449503    0.340731    0.933948    11.00000    0.03186    0.02861 = 
         0.02645    0.01274    0.00735    0.00279 
AFIX  43 
H43A  2    0.402882    0.343620    0.967013    11.00000   -1.20000 
AFIX   0 
C44A  1    0.573986    0.319934    0.938746    11.00000    0.02999    0.03308 = 
         0.03415    0.01893   -0.00219    0.00505 
AFIX  43 
H44A  2    0.612647    0.308896    0.975218    11.00000   -1.20000 
AFIX   0 
C45A  1    0.642768    0.315114    0.890452    11.00000    0.02382    0.02591 = 
         0.04790    0.01448    0.00771    0.00556 
AFIX  43 
H45A  2    0.728650    0.301353    0.894170    11.00000   -1.20000 
AFIX   0 
C46A  1    0.586141    0.330332    0.837179    11.00000    0.02404    0.03022 = 
         0.04001    0.01713    0.00991    0.00432 
AFIX  43 
H46A  2    0.632513    0.326378    0.803741    11.00000   -1.20000 
AFIX   0 
C47A  1    0.462187    0.351304    0.832347    11.00000    0.02055    0.02513 = 
         0.03032    0.01207    0.00701    0.00091 
AFIX  43 
H47B  2    0.423844    0.361726    0.795450    11.00000   -1.20000 
AFIX   0 
C48A  1    0.184864    0.412265    0.949858    11.00000    0.02495    0.01973 = 
         0.01733    0.00558    0.00470    0.00247 
C49A  1    0.063090    0.395406    0.957837    11.00000    0.02635    0.02418 = 
         0.02482    0.00754    0.00600    0.00449 
AFIX  43 
H49A  2   -0.001457    0.363217    0.919785    11.00000   -1.20000 
AFIX   0 
C50A  1    0.036356    0.425936    1.021836    11.00000    0.03327    0.03586 = 
         0.02861    0.01341    0.01445    0.00646 
AFIX  43 
H50A  2   -0.047181    0.415009    1.027294    11.00000   -1.20000 
AFIX   0 
C51A  1    0.130074    0.471954    1.077472    11.00000    0.04836    0.03658 = 
         0.01815    0.00597    0.01378    0.00351 
AFIX  43 
H51A  2    0.112184    0.490765    1.121275    11.00000   -1.20000 
AFIX   0 
C52A  1    0.248816    0.490581    1.069709    11.00000    0.04305    0.03224 = 
         0.02233    0.00172    0.00332   -0.00485 
AFIX  43 
H52A  2    0.312287    0.523512    1.107890    11.00000   -1.20000 
AFIX   0 
C53A  1    0.276390    0.461311    1.006009    11.00000    0.03089    0.02761 = 
         0.02324    0.00393    0.00653   -0.00448 
AFIX  43 
H53D  2    0.358451    0.474879    1.000698    11.00000   -1.20000 
  
AFIX   0 
  
RU1B  6    0.228514    0.253055    0.250557    11.00000    0.02133    0.01741 = 
         0.01761    0.00721    0.00529    0.00200 
RU2B  6    0.075338    0.141633    0.264376    11.00000    0.02219    0.01778 = 
         0.01983    0.00753    0.00714    0.00237 
CL1B  5    0.071989    0.289031    0.177051    11.00000    0.02380    0.02203 = 
         0.02149    0.01033    0.00404    0.00395 
P1B   4    0.165704    0.326203    0.344639    11.00000    0.02528    0.01790 = 
         0.01883    0.00682    0.00665    0.00269 
P2B   4    0.401971    0.319007    0.247598    11.00000    0.02305    0.01870 = 
         0.01956    0.00726    0.00505   -0.00001 
O1B   7    0.217670    0.086318    0.365499    11.00000    0.03474    0.03264 = 
         0.02725    0.01634    0.00671    0.00488 
C1B   1    0.087046    0.062842    0.168135    11.00000    0.02201    0.01766 = 
         0.01966    0.00813    0.00628    0.00476 
B3B   3    0.127266    0.026208    0.221705    11.00000    0.02656    0.01598 = 
         0.02178    0.00651    0.00813    0.00325 
H3B   2    0.065200   -0.021222    0.216232    11.00000    0.01385 
B4B   3    0.221617    0.024967    0.161034    11.00000    0.02728    0.01927 = 
         0.02059    0.00574    0.00842    0.00414 
H4B   2    0.221932   -0.022910    0.111653    11.00000   10.02100 
B5B   3    0.205450    0.124453    0.189084    11.00000    0.01946    0.02232 = 
         0.02462    0.01110    0.00735    0.00313 
H5B   2    0.210487    0.163537    0.160055    11.00000    0.01058 
B6B   3    0.237139    0.090858    0.306676    11.00000    0.02778    0.02021 = 
         0.02892    0.01217    0.00657    0.00301 
B7B   3    0.304182    0.022640    0.238324    11.00000    0.02760    0.02139 = 
         0.02622    0.01155    0.00680    0.00543 
H7B   2    0.334131   -0.027927    0.233278    11.00000    0.02518 
B8B   3    0.357878    0.089996    0.212777    11.00000    0.02611    0.02100 = 
         0.02399    0.00913    0.00935    0.00569 
H8B   2    0.429446    0.094363    0.188613    11.00000    0.03800 
B9B   3    0.290559    0.161178    0.277079    11.00000    0.02448    0.01542 = 
         0.02249    0.00551    0.00503    0.00045 
H9B   2    0.322383    0.228224    0.298629    11.00000    0.04789 
B10B  3    0.390362    0.105371    0.295170    11.00000    0.02623    0.02499 = 
         0.02692    0.01297    0.00484    0.00133 
H10B  2    0.482110    0.114868    0.330917    11.00000    0.01178 
C11B  1    0.318944    0.065108    0.403212    11.00000    0.03538    0.03542 = 
         0.03307    0.02059   -0.00113   -0.00254 
AFIX 137 
H11A  2    0.291797    0.064245    0.442334    11.00000   -1.50000 
H11C  2    0.396629    0.100245    0.418882    11.00000   -1.50000 
H11D  2    0.338731    0.016107    0.374608    11.00000   -1.50000 
AFIX   0 
C12B  1   -0.024655    0.035016    0.107567    11.00000    0.02308    0.02442 = 
         0.01992    0.00779    0.00724   -0.00121 
C13B  1   -0.053248   -0.039666    0.065753    11.00000    0.03060    0.02332 = 
         0.02876    0.01219    0.00875    0.00121 
AFIX  43 
H13B  2   -0.000113   -0.073128    0.075413    11.00000   -1.20000 
AFIX   0 
C14B  1   -0.158020   -0.066343    0.010100    11.00000    0.03513    0.02762 = 
         0.02461    0.00790    0.00757   -0.00471 
AFIX  43 
H14B  2   -0.175979   -0.117604   -0.017742    11.00000   -1.20000 
AFIX   0 
C15B  1   -0.235245   -0.018978   -0.004646    11.00000    0.02977    0.04008 = 
         0.02361    0.01240    0.00069   -0.00591 
AFIX  43 
H15B  2   -0.309233   -0.037290   -0.041420    11.00000   -1.20000 
AFIX   0 
C16B  1   -0.204924    0.056191    0.034484    11.00000    0.03488    0.03837 = 
         0.02359    0.01470    0.00164    0.00686 
AFIX  43 
H16B  2   -0.256211    0.089275    0.023071    11.00000   -1.20000 
AFIX   0 
C17B  1   -0.100755    0.083144    0.089850    11.00000    0.03808    0.01925 = 
         0.02238    0.00549    0.00711    0.00472 
AFIX  43 
H17B  2   -0.080621    0.134606    0.116055    11.00000   -1.20000 
AFIX   0 
C18B  1    0.035706    0.256492    0.330713    11.00000    0.02564    0.01616 = 
         0.02318    0.00698    0.01045    0.00750 
C19B  1    0.052800    0.215245    0.369693    11.00000    0.02691    0.02037 = 
         0.02120    0.00599    0.01317    0.00800 
AFIX  13 
H19B  2    0.129663    0.229641    0.408675    11.00000   -1.20000 
AFIX   0 
C20B  1   -0.021151    0.146260    0.345480    11.00000    0.03048    0.02568 = 
         0.02537    0.01221    0.01472    0.00868 
AFIX  13 
H20B  2    0.003426    0.113663    0.368461    11.00000   -1.20000 
AFIX   0 
C21B  1   -0.117529    0.119256    0.284874    11.00000    0.02359    0.02478 = 
         0.03302    0.00991    0.01434    0.00260 
AFIX  13 
H21B  2   -0.160390    0.067869    0.264980    11.00000   -1.20000 
AFIX   0 
C22B  1   -0.140351    0.161848    0.247846    11.00000    0.02450    0.02526 = 
         0.02714    0.00645    0.00956    0.00246 
AFIX  13 
H22B  2   -0.196031    0.138732    0.200866    11.00000   -1.20000 
AFIX   0 
C23B  1   -0.063140    0.227929    0.268927    11.00000    0.02526    0.02170 = 
         0.02707    0.00958    0.01359    0.00650 
AFIX  13 
H23B  2   -0.066860    0.251162    0.237040    11.00000   -1.20000 
AFIX   0 
C24B  1    0.261933    0.350663    0.429826    11.00000    0.02678    0.02164 = 
         0.02280    0.01076    0.00730    0.00197 
C25B  1    0.207075    0.381635    0.485442    11.00000    0.03486    0.02661 = 
         0.02421    0.00944    0.00749   -0.00080 
AFIX  43 
H25A  2    0.117569    0.388909    0.479027    11.00000   -1.20000 
AFIX   0 
C26B  1    0.281276    0.402155    0.550388    11.00000    0.04614    0.02761 = 
         0.01974    0.00535    0.01204    0.00127 
AFIX  43 
H26B  2    0.242257    0.422478    0.588110    11.00000   -1.20000 
AFIX   0 
C27B  1    0.409780    0.393146    0.559960    11.00000    0.04846    0.03697 = 
         0.01876    0.01262    0.00371    0.00447 
AFIX  43 
H27A  2    0.460310    0.407317    0.604530    11.00000   -1.20000 
AFIX   0 
C28B  1    0.467802    0.363645    0.505693    11.00000    0.03374    0.05319 = 
         0.02329    0.01267    0.00184    0.00695 
AFIX  43 
H28B  2    0.558318    0.358882    0.512844    11.00000   -1.20000 
AFIX   0 
C29B  1    0.392471    0.340911    0.440335    11.00000    0.03345    0.03785 = 
         0.02327    0.01345    0.00945    0.00822 
AFIX  43 
H29B  2    0.431099    0.318525    0.402677    11.00000   -1.20000 
AFIX   0 
C30B  1    0.094283    0.411452    0.355613    11.00000    0.03581    0.02209 = 
         0.01838    0.00889    0.01001    0.00794 
C31B  1   -0.036541    0.413335    0.330633    11.00000    0.03702    0.02752 = 
         0.03242    0.01081    0.00907    0.00683 
AFIX  43 
H31B  2   -0.094966    0.369635    0.309856    11.00000   -1.20000 
AFIX   0 
C32B  1   -0.081183    0.479515    0.336265    11.00000    0.04034    0.03662 = 
         0.03699    0.01242    0.00917    0.01719 
AFIX  43 
H32B  2   -0.170316    0.480652    0.318493    11.00000   -1.20000 
AFIX   0 
C33B  1    0.001374    0.543292    0.367086    11.00000    0.05836    0.02681 = 
         0.04076    0.01841    0.02084    0.02118 
AFIX  43 
H33B  2   -0.030610    0.588128    0.370356    11.00000   -1.20000 
AFIX   0 
C34B  1    0.129887    0.542378    0.393149    11.00000    0.05215    0.02310 = 
         0.03416    0.01126    0.01490    0.00398 
AFIX  43 
H34B  2    0.186819    0.586683    0.414889    11.00000   -1.20000 
AFIX   0 
C35B  1    0.177432    0.476468    0.387841    11.00000    0.03649    0.02685 = 
         0.02880    0.01107    0.01049    0.00240 
AFIX  43 
H35B  2    0.266521    0.475988    0.406221    11.00000   -1.20000 
AFIX   0 
C36B  1    0.460189    0.270432    0.169104    11.00000    0.02448    0.02039 = 
         0.02329    0.00889    0.00848   -0.00012 
C37B  1    0.589575    0.258788    0.169134    11.00000    0.02790    0.02699 = 
         0.02183    0.00915    0.00412   -0.00033 
AFIX  43 
H37B  2    0.651945    0.274252    0.210781    11.00000   -1.20000 
AFIX   0 
C38B  1    0.627989    0.224288    0.107823    11.00000    0.03126    0.03272 = 
         0.03040    0.01067    0.01575    0.00798 
AFIX  43 
H38A  2    0.716189    0.215397    0.108168    11.00000   -1.20000 
AFIX   0 
C39B  1    0.539473    0.203042    0.046938    11.00000    0.04107    0.02618 = 
         0.02729    0.00668    0.01523    0.00371 
AFIX  43 
H39B  2    0.566101    0.180199    0.005402    11.00000   -1.20000 
AFIX   0 
C40B  1    0.411665    0.215532    0.047404    11.00000    0.03204    0.04309 = 
         0.02269    0.01176    0.00051   -0.00345 
AFIX  43 
H40B  2    0.349822    0.201178    0.005731    11.00000   -1.20000 
AFIX   0 
C41B  1    0.372034    0.248676    0.107672    11.00000    0.02630    0.03437 = 
         0.02968    0.01282    0.00765    0.00332 
AFIX  43 
H41B  2    0.283349    0.256582    0.106870    11.00000   -1.20000 
AFIX   0 
C42B  1    0.544970    0.331087    0.314529    11.00000    0.02179    0.02953 = 
         0.01784    0.00937    0.00471   -0.00216 
C43B  1    0.599760    0.399200    0.365951    11.00000    0.03079    0.02735 = 
         0.02477    0.00825    0.00515    0.00004 
AFIX  43 
H43B  2    0.566635    0.442403    0.365208    11.00000   -1.20000 
AFIX   0 
C44B  1    0.701817    0.404991    0.418191    11.00000    0.03723    0.03507 = 
         0.02606    0.00664   -0.00144   -0.00607 
AFIX  43 
H44B  2    0.737940    0.451976    0.452919    11.00000   -1.20000 
AFIX   0 
C45B  1    0.751651    0.342508    0.420099    11.00000    0.02936    0.05142 = 
         0.02677    0.01560    0.00447    0.00196 
AFIX  43 
H45B  2    0.821972    0.346378    0.455792    11.00000   -1.20000 
AFIX   0 
C46B  1    0.697455    0.274497    0.369277    11.00000    0.02721    0.03886 = 
         0.03195    0.01772    0.00976    0.01139 
AFIX  43 
H46B  2    0.730806    0.231500    0.370420    11.00000   -1.20000 
AFIX   0 
C47B  1    0.595866    0.268142    0.317027    11.00000    0.02348    0.03214 = 
         0.02317    0.01188    0.00775    0.00303 
AFIX  43 
H47A  2    0.560064    0.220978    0.282527    11.00000   -1.20000 
AFIX   0 
C48B  1    0.394572    0.410375    0.249255    11.00000    0.03017    0.02015 = 
         0.01763    0.00627    0.00274   -0.00344 
C49B  1    0.285365    0.446214    0.256209    11.00000    0.03450    0.02537 = 
         0.02219    0.01167    0.00605    0.00101 
AFIX  43 
H49B  2    0.209485    0.422784    0.258869    11.00000   -1.20000 
AFIX   0 
C50B  1    0.284170    0.516871    0.259441    11.00000    0.05434    0.02654 = 
         0.02495    0.01189    0.00984    0.01130 
AFIX  43 
H50B  2    0.207560    0.540924    0.263848    11.00000   -1.20000 
AFIX   0 
C51B  1    0.394472    0.551677    0.256223    11.00000    0.06029    0.02189 = 
         0.02231    0.00901    0.00804   -0.00128 
AFIX  43 
H51B  2    0.394661    0.600157    0.259635    11.00000   -1.20000 
AFIX   0 
C52B  1    0.504586    0.515550    0.248008    11.00000    0.04912    0.02822 = 
         0.02490    0.01107    0.00830   -0.00839 
AFIX  43 
H52B  2    0.579794    0.538944    0.244708    11.00000   -1.20000 
AFIX   0 
C53B  1    0.505917    0.445724    0.244571    11.00000    0.03635    0.02782 = 
         0.02145    0.00955    0.00235   -0.00652 
AFIX  43 
H53A  2    0.582028    0.421376    0.239035    11.00000   -1.20000 
AFIX   0 
HKLF 4 
  
REM  igrum in P-1 
REM R1 =  0.0462 for   15232 Fo > 4sig(Fo)  and  0.0696 for all   22374 data 
REM   1102 parameters refined using      0 restraints 
  
END 
  
WGHT      0.0598      0.0000 
  
REM Highest difference peak  1.792,  deepest hole -0.643,  1-sigma level  0.126 
Q1    1  -0.0399  0.1662  0.6355  11.00000  0.05    1.79 
Q2    1   0.2963  0.3826  0.3824  11.00000  0.05    1.76 
Q3    1   0.2610  0.3924  0.7567  11.00000  0.05    1.60 
Q4    1  -0.0510  0.1695  0.7848  11.00000  0.05    1.51 
Q5    1  -0.0824  0.1818  0.1620  11.00000  0.05    1.49 
Q6    1  -0.2152  0.4286  0.3238  11.00000  0.05    1.47 
Q7    1   0.0104  0.0166  0.1380  11.00000  0.05    1.45 
Q8    1   0.4134  0.6759  0.2898  11.00000  0.05    1.45 
Q9    1   0.1417  0.2695  0.3953  11.00000  0.05    1.44 
Q10   1   0.1620  0.1247  0.1178  11.00000  0.05    1.44 
Q11   1   0.0679  0.2903  0.1449  11.00000  0.05    1.44 
Q12   1  -0.1155  0.0425  0.6545  11.00000  0.05    1.38 
Q13   1   0.2026  0.1141  0.7416  11.00000  0.05    1.36 
Q14   1   0.3423  0.5450  1.1530  11.00000  0.05    1.28 
Q15   1   0.6266  0.3136  0.3335  11.00000  0.05    1.25 
Q16   1   0.2649  0.2397  0.8735  11.00000  0.05    1.22 
Q17   1   0.1805  0.2630  0.6236  11.00000  0.05    1.22 
Q18   1   0.1785  0.4066  0.9046  11.00000  0.05    1.09 
Q19   1   0.1115  0.2887  0.8130  11.00000  0.05    1.04 
Q20   1   0.3867  0.3653  0.2411  11.00000  0.05    0.89 
Q21   1   0.1514  0.2523  0.7339  11.00000  0.05    0.85 
Q22   1   0.2364  0.2095  0.2592  11.00000  0.05    0.84 
Q23   1   0.1597  0.1314  0.2742  11.00000  0.05    0.84 
Q24   1   0.0295  0.2918  0.7576  11.00000  0.05    0.83 
Q25   1   0.5600  0.1869  0.2069  11.00000  0.05    0.81 
Q26   1   0.6179  0.4644  0.2191  11.00000  0.05    0.81 
Q27   1   0.1900  0.2625  0.2791  11.00000  0.05    0.81 
Q28   1   0.3011  0.2897  0.2468  11.00000  0.05    0.78 
Q29   1   0.0567  0.1360  0.2244  11.00000  0.05    0.76 
Q30   1   0.2515  0.5635  0.2990  11.00000  0.05    0.76 
Q31   1   0.3122  0.2423  0.2563  11.00000  0.05    0.75 
Q32   1   0.5075  0.3404  0.8572  11.00000  0.05    0.74 
Q33   1   0.1338  0.4174  0.2827  11.00000  0.05    0.74 
Q34   1  -0.1802  0.4130  0.9456  11.00000  0.05    0.73 
Q35   1   0.4613  0.3505  0.2317  11.00000  0.05    0.73 
Q36   1   0.0492  0.1595  0.6812  11.00000  0.05    0.73 
Q37   1   0.1848  0.2612  0.7884  11.00000  0.05    0.72 
Q38   1   0.7154  0.3002  0.1944  11.00000  0.05    0.71 
Q39   1  -0.0724  0.0321  0.2797  11.00000  0.05    0.71 
Q40   1   0.4206  0.3529  0.8542  11.00000  0.05    0.70 
Q41   1  -0.0468 -0.0054  0.2391  11.00000  0.05    0.69 
Q42   1   0.0748  0.1874  0.2644  11.00000  0.05    0.68 
Q43   1  -0.0082  0.1538  0.2577  11.00000  0.05    0.68 
Q44   1  -0.0145  0.3096  0.2925  11.00000  0.05    0.67 
Q45   1   0.0018  0.1338  0.5896  11.00000  0.05    0.66 
Q46   1   0.0383  0.2603  0.1649  11.00000  0.05    0.66 
Q47   1   0.1035  0.1500  0.3091  11.00000  0.05    0.65 
Q48   1   0.4449  0.2169  0.7267  11.00000  0.05    0.65 
Q49   1   0.4016  0.2206  0.3297  11.00000  0.05    0.64 
Q50   1   0.2433  0.2983  0.2582  11.00000  0.05    0.64 
Q51   1   0.0381  0.1968  0.6360  11.00000  0.05    0.62 
Q52   1   0.2014  0.2991  0.2999  11.00000  0.05    0.62 
Q53   1   0.0985  0.2340  0.7725  11.00000  0.05    0.62 
Q54   1   0.7544  0.2902  0.8174  11.00000  0.05    0.61 
Q55   1   0.1845  0.4324  1.1640  11.00000  0.05    0.60 
Q56   1   0.6958  0.4420  0.4689  11.00000  0.05    0.60 
Q57   1   0.6373  0.4004  0.3030  11.00000  0.05    0.60 
Q58   1   0.0214  0.1027  0.6906  11.00000  0.05    0.60 
Q59   1   0.2640  0.2478  0.2122  11.00000  0.05    0.60 
Q60   1   0.2200  0.4224  0.8592  11.00000  0.05    0.60 
Q61   1   0.1546  0.3186  0.7801  11.00000  0.05    0.60 
Q62   1   0.2995  0.3590  0.8748  11.00000  0.05    0.59 
Q63   1   0.1220  0.1940  0.6555  11.00000  0.05    0.59 
Q64   1   0.0458  0.1601  0.2997  11.00000  0.05    0.59 
Q65   1   0.0901  0.2733  0.7280  11.00000  0.05    0.59 
Q66   1   0.1131  0.1277  0.8872  11.00000  0.05    0.59 
Q67   1   0.0979  0.3218  0.1908  11.00000  0.05    0.59 
Q68   1  -0.0233  0.0268  0.5122  11.00000  0.05    0.59 
Q69   1   0.3478  0.2220  0.7239  11.00000  0.05    0.58 
Q70   1   0.0417  0.2497  0.7650  11.00000  0.05    0.57 
Q71   1   0.1251  0.1313  0.6511  11.00000  0.05    0.57 
Q72   1   0.2600  0.2689  0.2967  11.00000  0.05    0.57 
Q73   1   0.1544  0.2407  0.8150  11.00000  0.05    0.56 
Q74   1   0.4355  0.3022  0.2069  11.00000  0.05    0.55 
Q75   1   0.0739  0.0994  0.2746  11.00000  0.05    0.55 
Q76   1  -0.1823  0.1912  0.6598  11.00000  0.05    0.55 
Q77   1   0.1046  0.3275  0.7734  11.00000  0.05    0.55 
Q78   1   0.0571 -0.0777  0.1802  11.00000  0.05    0.54 
Q79   1  -0.0006  0.1627  1.0227  11.00000  0.05    0.54 
Q80   1   0.2228  0.3476  0.3940  11.00000  0.05    0.54 
Q81   1   0.1188  0.1602  0.1635  11.00000  0.05    0.54 
Q82   1   0.4626  0.3381  0.2987  11.00000  0.05    0.54 
Q83   1   0.0929  0.4139  0.3900  11.00000  0.05    0.54 
Q84   1   0.2341  0.1075  0.3457  11.00000  0.05    0.53 
Q85   1   0.0140  0.1101  0.6430  11.00000  0.05    0.53 
Q86   1   0.1819  0.2273  0.2042  11.00000  0.05    0.52 
Q87   1   0.1683  0.3230  0.9378  11.00000  0.05    0.52 
Q88   1   0.4180  0.4770  0.4736  11.00000  0.05    0.51 
Q89   1   0.3017 -0.0270  0.6583  11.00000  0.05    0.50 
Q90   1   0.0966  0.2874  0.3357  11.00000  0.05    0.50 
Q91   1   0.0389  0.0612  0.1380  11.00000  0.05    0.50 
Q92   1  -0.0790  0.2633  0.1711  11.00000  0.05    0.50 
Q93   1  -0.1437  0.0512  0.0309  11.00000  0.05    0.49 
Q94   1   0.4423  0.4192  0.2395  11.00000  0.05    0.49 
Q95   1   0.2523  0.1169  0.6262  11.00000  0.05    0.49 
Q96   1   0.3254  0.4413  0.3305  11.00000  0.05    0.49 
Q97   1  -0.1381  0.1743  0.2843  11.00000  0.05    0.48 
Q98   1  -0.0661  0.4507  0.3010  11.00000  0.05    0.48 
Q99   1  -0.0650 -0.0348  0.5581  11.00000  0.05    0.48 
Q100  1   0.0604  0.2085  0.6814  11.00000  0.05    0.48 
Q101  1   0.0703  0.1385  0.5981  11.00000  0.05    0.48 
Q102  1   0.0848  0.1902  0.2998  11.00000  0.05    0.48 
Q103  1  -0.1231  0.2983  0.7546  11.00000  0.05    0.48 
Q104  1   0.0619  0.1603  0.7584  11.00000  0.05    0.47 
Q105  1   0.0428  0.1958  0.8377  11.00000  0.05    0.47 
Q106  1   0.4189  0.2616  0.7150  11.00000  0.05    0.47 
Q107  1   0.1315  0.2330  0.6885  11.00000  0.05    0.47 
Q108  1   0.1832  0.2320  0.3519  11.00000  0.05    0.47 
Q109  1   0.2574  0.3800  0.4637  11.00000  0.05    0.47 
Q110  1  -0.0405  0.2221  0.7362  11.00000  0.05    0.47 
Q111  1   0.1830  0.2687  0.6697  11.00000  0.05    0.47 
Q112  1   0.1615  0.0743  0.1685  11.00000  0.05    0.46 
Q113  1   0.1531  0.1793  0.8373  11.00000  0.05    0.46 
Q114  1  -0.2075 -0.0386  0.0184  11.00000  0.05    0.46 
Q115  1   0.1854  0.3858  0.2407  11.00000  0.05    0.46 
Q116  1   0.1951  0.3234  0.8289  11.00000  0.05    0.46 
Q117  1   0.1489  0.4471  0.5451  11.00000  0.05    0.46 
Q118  1  -0.1818  0.2587  0.5722  11.00000  0.05    0.46 
Q119  1  -0.0370  0.4454  0.9268  11.00000  0.05    0.46 
Q120  1   0.4964  0.1388  0.6350  11.00000  0.05    0.45 
; 
_shelx_res_checksum   62247 
  
_shelx_hkl_file 
; 
   0   0  -1   -0.07    0.08   1 
   0   0  -2 1513.80   14.22   1 
   0   0  -3    7.88    0.73   1 
   0   0  -4    0.43    0.40   1 
   0   0  -5  323.24    5.62   1 
   0   0  -6  107.17    3.46   1 
   0   0  -7   19.66    1.66   1 
   0   0  -8  470.03    8.48   1 
   0   0  -9    3.75    1.06   1 
   0   0 -10  384.79    8.49   1 
   0   0 -11   34.76    2.71   1 
   0   0 -12  182.49    6.36   1 
   0   0 -13   63.77    3.99   1 
   0   0 -14    2.73    1.18   1 
   0   0 -15    3.20    1.42   1 
   0   0 -16   73.04    4.83   1 
   0   0 -17   24.68    3.07   1 
   0   0 -18   30.28    3.37   1 
   0   0 -19    8.45    2.24   1 
   0   0 -20    5.97    2.02   1 
   0   0 -21   34.11    4.02   1 
   0   0 -22    8.00    2.55   1 
   0   0 -23   16.39    3.48   1 
   0   0 -24    1.10    2.01   1 
   0   0 -25    0.78    2.12   1 
   0   0 -26    1.75    2.21   1 
   0   0 -27    0.50    2.26   1 
   0   1 -28    1.58    2.55   1 
   0   1 -27    1.30    2.27   1 
   0   1 -26    0.63    2.13   1 
   0   1 -25   24.00    4.16   1 
   0   1 -24   -0.17    1.80   1 
   0   1 -23   85.42    6.39   1 
   0   1 -22    4.14    1.97   1 
   0   1 -21    4.85    1.96   1 
   0   1 -20    2.85    1.73   1 
   0   1 -19    3.31    1.59   1 
   0   1 -18   66.51    4.78   1 
   0   1 -17    3.37    1.56   1 
   0   1 -16    1.24    1.12   1 
   0   1 -15  164.89    6.72   1 
   0   1 -14    8.64    1.73   1 
   0   1 -13  270.16    7.81   1 
   0   1 -12   42.99    3.05   1 
   0   1 -11   12.22    1.72   1 
   0   1 -10   34.05    2.44   1 
   0   1  -9    4.59    1.05   1 
   0   1  -8  114.71    3.89   1 
   0   1  -7   21.05    1.61   1 
   0   1  -6  187.25    4.23   1 
   0   1  -5  241.70    4.41   1 
   0   1  -4  189.16    3.45   1 
   0   1  -3  293.28    3.97   1 
   0   1  -2   88.77    1.66   1 
   0  -1   0   -0.05    0.07   1 
   0  -1  -2    2.71    0.47   1 
   0  -1  -3  946.61    9.86   1 
   0  -1  -4  287.28    5.25   1 
   0  -1  -5  105.69    3.39   1 
   0  -1  -6  305.79    6.30   1 
   0  -1  -7  134.05    4.37   1 
   0  -1  -8   73.16    3.41   1 
   0  -1  -9  287.49    7.22   1 
   0  -1 -10  210.17    6.48   1 
   0  -1 -11  364.28    8.95   1 
   0  -1 -12  112.98    5.18   1 
   0  -1 -13  395.40   10.20   1 
   0  -1 -14   68.93    4.47   1 
   0  -1 -15  125.81    6.15   1 
   0  -1 -16   52.54    4.25   1 
   0  -1 -17    9.99    2.27   1 
   0  -1 -18   17.37    2.84   1 
   0  -1 -19   56.02    4.76   1 
   0  -1 -20    1.29    1.45   1 
   0  -1 -21   60.86    5.36   1 
   0  -1 -22   28.50    4.12   1 
   0  -1 -23   55.56    5.49   1 
   0  -1 -24   32.30    4.63   1 
   0  -1 -25   14.16    3.53   1 
   0  -1 -26   10.83    3.33   1 
   0  -1 -27   10.44    3.44   1 
   0   2 -28   -1.02    2.12   1 
   0   2 -27   13.06    3.42   1 
   0   2 -26    5.65    2.51   1 
   0   2 -25    0.80    1.88   1 
   0   2 -24   24.58    3.90   1 
   0   2 -23    2.26    1.86   1 
   0   2 -22    8.62    2.47   1 
   0   2 -21    2.18    1.61   1 
   0   2 -20   -0.25    1.20   1 
   0   2 -19   28.76    3.29   1 
   0   2 -18   17.60    2.70   1 
   0   2 -17  161.27    6.90   1 
   0   2 -16   16.02    2.40   1 
   0   2 -15    6.41    1.65   1 
   0   2 -14    3.87    1.29   1 
   0   2 -13    6.48    1.41   1 
   0   2 -12   79.27    3.89   1 
   0   2 -11   27.95    2.26   1 
   0   2 -10   59.39    3.02   1 
   0   2  -9   26.00    1.90   1 
   0   2  -8    4.12    0.86   1 
   0   2  -7   22.47    1.54   1 
   0   2  -6    8.70    0.91   1 
   0   2  -5  430.63    5.65   1 
   0   2  -4   72.01    1.80   1 
   0   2  -3  180.11    2.71   1 
   0   2  -2 1732.73   36.04   1 
   0  -2   1   17.50    0.58   1 
   0   2  -1   16.77    0.55   1 
   0  -2   0 1045.17   11.20   1 
   0  -2  -1   71.02    1.92   1 
   0  -2  -2    2.92    0.60   1 
   0  -2  -3  408.19    6.23   1 
   0  -2  -4  380.19    6.60   1 
   0  -2  -5  620.83    9.15   1 
   0  -2  -6  104.37    3.80   1 
   0  -2  -7  311.40    7.11   1 
   0  -2  -8   33.91    2.51   1 
   0  -2  -9   48.92    3.13   1 
   0  -2 -10   55.29    3.51   1 
   0  -2 -11   16.56    2.20   1 
   0  -2 -12    0.48    0.87   1 
   0  -2 -13   35.21    3.17   1 
   0  -2 -14   45.71    3.77   1 
   0  -2 -15   34.85    3.45   1 
   0  -2 -16  104.76    6.07   1 
   0  -2 -17    6.78    2.03   1 
   0  -2 -18   51.23    4.59   1 
   0  -2 -19   15.92    3.03   1 
   0  -2 -20    1.48    1.75   1 
   0  -2 -21    1.65    1.81   1 
   0  -2 -22    0.47    1.76   1 
   0  -2 -23   -0.09    1.81   1 
   0  -2 -24    5.83    2.68   1 
   0  -2 -25    2.39    2.55   1 
   0  -2 -26   10.48    3.33   1 
   0   3 -29   -0.23    2.35   1 
   0   3 -28    2.45    2.30   1 
   0   3 -27   15.37    3.57   1 
   0   3 -26    2.84    2.08   1 
   0   3 -25   65.19    5.67   1 
   0   3 -24   15.15    3.24   1 
   0   3 -23    9.66    2.53   1 
   0   3 -22   14.94    2.91   1 
   0   3 -21    0.74    1.33   1 
   0   3 -20    2.46    1.50   1 
   0   3 -19    3.10    1.52   1 
   0   3 -18   63.27    4.39   1 
   0   3 -17    0.96    1.05   1 
   0   3 -16   18.52    2.30   1 
   0   3 -15   41.20    3.18   1 
   0   3 -14    0.62    0.86   1 
   0   3 -13   39.07    2.82   1 
   0   3 -12    3.12    1.01   1 
   0   3 -11  197.40    5.51   1 
   0   3 -10  167.02    4.75   1 
   0   3  -9   62.14    2.68   1 
   0   3  -8  469.51    7.11   1 
   0   3  -7    0.73    0.41   1 
   0   3  -6   30.63    1.44   1 
   0   3  -5  327.62    4.41   1 
   0   3  -4    2.49    0.34   1 
   0  -3   3  357.50    5.56   1 
   0   3  -3  375.79    5.94   1 
   0  -3   1   68.85    1.52   1 
   0  -3   0  142.22    2.74   1 
   0  -3  -1   21.51    1.24   1 
   0  -3  -2  107.40    3.03   1 
   0  -3  -3   83.06    2.89   1 
   0  -3  -4   -0.14    0.51   1 
   0  -3  -5    0.49    0.57   1 
   0  -3  -6   25.23    2.07   1 
   0  -3  -7    2.48    0.89   1 
   0  -3  -8   -0.25    0.55   1 
   0  -3  -9  373.03    8.87   1 
   0  -3 -10   11.73    1.92   1 
   0  -3 -11  548.52   11.84   1 
   0  -3 -12    5.48    1.58   1 
   0  -3 -13  140.90    6.42   1 
   0  -3 -14    0.97    1.20   1 
   0  -3 -15  171.79    7.58   1 
   0  -3 -16    4.08    1.73   1 
   0  -3 -17   49.67    4.53   1 
   0  -3 -18   18.20    3.17   1 
   0  -3 -19   80.66    5.97   1 
   0  -3 -20    2.09    1.85   1 
   0  -3 -21   44.91    4.89   1 
   0  -3 -22   16.88    3.47   1 
   0  -3 -23    9.47    2.85   1 
   0  -3 -24    3.03    2.41   1 
   0  -3 -25   19.28    4.18   1 
   0  -3 -26   -0.15    2.42   1 
   0   4 -29    8.20    3.15   1 
   0   4 -28    0.98    2.22   1 
   0   4 -27    8.33    2.73   1 
   0   4 -26    4.33    2.31   1 
   0   4 -25    0.97    1.81   1 
   0   4 -24    6.01    2.18   1 
   0   4 -23    2.38    1.86   1 
   0   4 -22   50.42    4.44   1 
   0   4 -21   38.27    3.81   1 
   0   4 -20    9.80    2.21   1 
   0   4 -19  104.88    5.63   1 
   0   4 -18   52.75    3.92   1 
   0   4 -17  147.80    6.14   1 
   0   4 -16    2.49    1.15   1 
   0   4 -15   74.43    4.03   1 
   0   4 -14   96.79    4.36   1 
   0   4 -13  144.51    5.07   1 
   0   4 -12  533.70    9.47   1 
   0   4 -11  215.03    5.52   1 
   0   4 -10   10.27    1.26   1 
   0   4  -9   61.44    2.53   1 
   0   4  -8    5.90    0.83   1 
   0   4  -7   20.37    1.19   1 
   0   4  -6  158.94    2.94   1 
   0   4  -5    0.57    0.26   1 
   0   4  -4   51.19    1.15   1 
   0  -4   2  141.28    2.36   1 
   0  -4   1  164.07    2.89   1 
   0  -4   0    3.23    0.60   1 
   0  -4  -1  185.51    3.97   1 
   0  -4  -2   20.01    1.50   1 
   0  -4  -3   65.89    2.75   1 
   0  -4  -4  169.57    4.84   1 
   0  -4  -5  431.07    8.21   1 
   0  -4  -6  124.29    4.55   1 
   0  -4  -7  154.04    5.37   1 
   0  -4  -8    1.23    0.88   1 
   0  -4  -9   74.95    4.11   1 
   0  -4 -10   64.40    4.00   1 
   0  -4 -11   40.09    3.31   1 
   0  -4 -12    0.23    0.85   1 
   0  -4 -13   81.90    5.01   1 
   0  -4 -14  107.26    5.95   1 
   0  -4 -15    1.24    1.22   1 
   0  -4 -16   30.57    3.57   1 
   0  -4 -17   -0.20    1.31   1 
   0  -4 -18    1.59    1.65   1 
   0  -4 -19    6.83    2.40   1 
   0  -4 -20    2.68    1.98   1 
   0  -4 -21    4.43    2.40   1 
   0  -4 -22    4.06    2.22   1 
   0  -4 -23    2.48    2.35   1 
   0  -4 -24   10.80    3.32   1 
   0  -4 -25    6.80    2.99   1 
   0   5 -29   11.78    3.51   1 
   0   5 -28    1.63    2.29   1 
   0   5 -27   98.23    7.00   1 
   0   5 -26    6.46    2.33   1 
   0   5 -25  101.91    6.63   1 
   0   5 -24   22.38    3.42   1 
   0   5 -23   28.84    3.50   1 
   0   5 -22    0.91    1.37   1 
   0   5 -21   26.82    3.38   1 
   0   5 -20   25.20    2.95   1 
   0   5 -19   34.89    3.26   1 
   0   5 -18    0.13    0.90   1 
   0   5 -17   11.98    1.98   1 
   0   5 -16    5.62    1.49   1 
   0   5 -15   19.80    2.11   1 
   0   5 -14   70.82    3.59   1 
   0   5 -13   53.97    2.96   1 
   0   5 -12   -0.12    0.56   1 
   0   5 -11    1.39    0.63   1 
   0   5 -10   78.27    2.86   1 
   0   5  -9   35.09    1.77   1 
   0   5  -8   46.89    1.83   1 
   0   5  -7  130.12    2.70   1 
   0   5  -6  208.75    3.16   1 
   0   5  -5  715.54    8.26   1 
   0  -5   3    4.48    0.45   1 
   0  -5   2 2315.30   20.65   1 
   0  -5   1   76.52    2.16   1 
   0  -5   0  140.25    3.32   1 
   0  -5  -1   93.81    2.98   1 
   0  -5  -2   96.01    3.30   1 
   0  -5  -3   23.44    1.79   1 
   0  -5  -4   32.29    2.24   1 
   0  -5  -5   95.63    3.97   1 
   0  -5  -6    5.30    1.20   1 
   0  -5  -7    4.40    1.19   1 
   0  -5  -8   31.19    2.70   1 
   0  -5  -9   36.13    3.02   1 
   0  -5 -10   26.71    2.75   1 
   0  -5 -11    0.56    0.92   1 
   0  -5 -12   94.31    5.30   1 
   0  -5 -13   16.80    2.61   1 
   0  -5 -14    7.47    1.97   1 
   0  -5 -15   44.32    4.11   1 
   0  -5 -16   68.97    5.29   1 
   0  -5 -17   51.98    4.75   1 
   0  -5 -18   23.59    3.61   1 
   0  -5 -19   30.79    4.20   1 
   0  -5 -20    0.75    1.68   1 
   0  -5 -21    0.29    1.87   1 
   0  -5 -22    2.65    2.25   1 
   0  -5 -23    0.36    2.28   1 
   0  -5 -24   21.96    4.41   1 
   0   6 -28    2.78    2.19   1 
   0   6 -27    4.36    2.33   1 
   0   6 -26   18.55    3.33   1 
   0   6 -25    0.71    1.67   1 
   0   6 -24   57.58    4.76   1 
   0   6 -23   20.12    3.02   1 
   0   6 -22   10.36    2.26   1 
   0   6 -21   29.40    3.20   1 
   0   6 -20    0.64    1.09   1 
   0   6 -19    0.45    1.10   1 
   0   6 -18    0.34    1.01   1 
   0   6 -17   71.13    4.05   1 
   0   6 -16  149.31    5.53   1 
   0   6 -15  148.11    5.21   1 
   0   6 -14  361.99    7.75   1 
   0   6 -13  253.58    6.09   1 
   0   6 -12  150.00    4.37   1 
   0   6 -11  332.50    6.14   1 
   0   6 -10   30.20    1.69   1 
   0   6  -9    7.52    0.84   1 
   0   6  -8  276.13    4.27   1 
   0   6  -7  215.44    3.25   1 
   0   6  -6  526.89    6.06   1 
   0  -6   3   25.84    1.05   1 
   0  -6   2   41.84    1.57   1 
   0  -6   1   29.05    1.50   1 
   0  -6   0   11.45    1.17   1 
   0  -6  -1    7.19    1.06   1 
   0  -6  -2   10.11    1.29   1 
   0  -6  -3    2.35    0.86   1 
   0  -6  -4    7.92    1.35   1 
   0  -6  -5    2.25    0.96   1 
   0  -6  -6   16.09    1.88   1 
   0  -6  -7   13.04    1.87   1 
   0  -6  -8   72.11    4.11   1 
   0  -6  -9   19.84    2.53   1 
   0  -6 -10   22.96    2.71   1 
   0  -6 -11   46.03    3.78   1 
   0  -6 -12    1.41    1.24   1 
   0  -6 -13    0.41    1.21   1 
   0  -6 -14    4.77    1.78   1 
   0  -6 -15    1.79    1.52   1 
   0  -6 -16   54.33    4.88   1 
   0  -6 -17   30.33    4.09   1 
   0  -6 -18    0.91    1.61   1 
   0  -6 -19    0.29    1.68   1 
   0  -6 -20   -0.25    1.83   1 
   0  -6 -21    2.11    2.07   1 
   0  -6 -22    0.42    2.07   1 
   0  -6 -23    0.40    2.18   1 
   0  -6 -24   -1.20    2.25   1 
   0   7 -27   45.17    4.74   1 
   0   7 -26    2.96    1.93   1 
   0   7 -25   19.14    3.22   1 
   0   7 -24    4.62    1.95   1 
   0   7 -23   27.16    3.23   1 
   0   7 -22   36.94    3.58   1 
   0   7 -21   61.75    4.28   1 
   0   7 -20   61.03    4.10   1 
   0   7 -19   63.82    4.01   1 
   0   7 -18   25.53    2.49   1 
   0   7 -17   14.30    1.99   1 
   0   7 -16    8.21    1.50   1 
   0   7 -15    1.16    0.82   1 
   0   7 -14   -0.17    0.59   1 
   0   7 -13    1.28    0.65   1 
   0   7 -12    9.63    1.15   1 
   0   7 -11  134.97    3.59   1 
   0   7 -10   15.51    1.17   1 
   0   7  -9    0.68    0.41   1 
   0   7  -8  260.33    3.76   1 
   0   7  -7   25.62    0.92   1 
   0  -7   4  219.07    3.25   1 
   0  -7   3  188.37    3.28   1 
   0  -7   2 1206.65   11.52   1 
   0  -7   1  397.15    6.16   1 
   0  -7   0  171.13    4.28   1 
   0  -7  -1   67.34    2.84   1 
   0  -7  -2  559.45    9.14   1 
   0  -7  -3    0.28    0.65   1 
   0  -7  -4  105.63    4.29   1 
   0  -7  -5    8.57    1.55   1 
   0  -7  -6    0.75    0.82   1 
   0  -7  -7  163.50    6.09   1 
   0  -7  -8   70.84    4.20   1 
   0  -7  -9    2.83    1.28   1 
   0  -7 -10  258.56    8.63   1 
   0  -7 -11   61.09    4.41   1 
   0  -7 -12   31.53    3.32   1 
   0  -7 -13   -0.41    1.00   1 
   0  -7 -14    1.67    1.41   1 
   0  -7 -15   33.21    3.83   1 
   0  -7 -16    0.91    1.42   1 
   0  -7 -17   55.67    5.20   1 
   0  -7 -18    2.98    1.97   1 
   0  -7 -19    8.88    2.75   1 
   0  -7 -20    2.20    2.08   1 
   0  -7 -21    1.52    1.96   1 
   0  -7 -22   13.65    3.44   1 
   0  -7 -23    2.35    2.56   1 
   0   8 -25    0.33    1.60   1 
   0   8 -24    3.04    1.74   1 
   0   8 -23    1.94    1.56   1 
   0   8 -22   -0.24    1.19   1 
   0   8 -21   -0.21    1.05   1 
   0   8 -20    7.44    1.70   1 
   0   8 -19   17.42    2.14   1 
   0   8 -18   38.56    2.88   1 
   0   8 -17    1.99    1.01   1 
   0   8 -16  227.48    6.13   1 
   0   8 -15   15.75    1.63   1 
   0   8 -14  154.53    4.55   1 
   0   8 -13  132.64    3.91   1 
   0   8 -12   69.29    2.63   1 
   0   8 -11    1.24    0.55   1 
   0   8 -10  260.29    4.30   1 
   0   8  -9    3.72    0.56   1 
   0   8  -8  828.84    8.44   1 
   0  -8   5  103.77    1.98   1 
   0  -8   4   10.38    0.82   1 
   0  -8   3   22.21    1.28   1 
   0  -8   2    7.09    0.91   1 
   0  -8   1   18.30    1.43   1 
   0  -8   0   23.48    1.72   1 
   0  -8  -1    7.19    1.18   1 
   0  -8  -2  337.19    7.35   1 
   0  -8  -3  109.16    4.29   1 
   0  -8  -4   90.38    4.11   1 
   0  -8  -5   71.60    3.87   1 
   0  -8  -6    6.71    1.50   1 
   0  -8  -7   12.83    1.98   1 
   0  -8  -8    7.38    1.67   1 
   0  -8  -9    2.14    1.18   1 
   0  -8 -10    0.81    1.11   1 
   0  -8 -11    8.80    2.12   1 
   0  -8 -12   -0.31    1.05   1 
   0  -8 -13   93.89    5.88   1 
   0  -8 -14   18.76    3.14   1 
   0  -8 -15   21.60    3.45   1 
   0  -8 -16    5.48    2.27   1 
   0  -8 -17    9.61    2.75   1 
   0  -8 -18   10.45    2.95   1 
   0  -8 -19   -0.67    1.82   1 
   0  -8 -20    8.84    3.03   1 
   0  -8 -21    8.66    2.95   1 
   0  -8 -22    0.19    2.31   1 
   0   9 -23   19.39    2.81   1 
   0   9 -22   72.41    4.54   1 
   0   9 -21   30.91    2.94   1 
   0   9 -20   35.29    2.96   1 
   0   9 -19   13.52    1.96   1 
   0   9 -18   37.26    2.78   1 
   0   9 -17   25.33    2.21   1 
   0   9 -16  154.95    4.91   1 
   0   9 -15    0.67    0.72   1 
   0   9 -14   50.03    2.45   1 
   0   9 -13   14.38    1.35   1 
   0   9 -12    2.34    0.68   1 
   0   9 -11    0.98    0.51   1 
   0   9 -10   75.24    1.98   1 
   0   9  -9    4.46    0.55   1 
   0  -9   5  212.86    3.27   1 
   0  -9   4    1.10    0.47   1 
   0  -9   3   81.51    2.54   1 
   0  -9   2  135.05    3.53   1 
   0  -9   1   91.40    3.19   1 
   0  -9   0  156.74    4.58   1 
   0  -9  -1   34.92    2.34   1 
   0  -9  -2    0.94    0.78   1 
   0  -9  -3  299.26    7.38   1 
   0  -9  -4   15.80    1.93   1 
   0  -9  -5  364.29    8.93   1 
   0  -9  -6   21.94    2.42   1 
   0  -9  -7  121.80    5.57   1 
   0  -9  -8   39.92    3.44   1 
   0  -9  -9    1.68    1.23   1 
   0  -9 -10    8.97    2.10   1 
   0  -9 -11   23.39    3.16   1 
   0  -9 -12    4.72    1.86   1 
   0  -9 -13   72.01    5.39   1 
   0  -9 -14    8.30    2.44   1 
   0  -9 -15   54.30    5.07   1 
   0  -9 -16   23.83    3.73   1 
   0  -9 -17    8.72    2.72   1 
   0  -9 -18   15.34    3.47   1 
   0  -9 -19    1.41    2.14   1 
   0  -9 -20    6.64    2.80   1 
   0  -9 -21    1.85    2.26   1 
   0  10 -21   16.77    2.30   1 
   0  10 -20   55.14    3.55   1 
   0  10 -19   68.67    3.73   1 
   0  10 -18   76.33    3.69   1 
   0  10 -17   -0.43    0.73   1 
   0  10 -16   23.87    1.94   1 
   0  10 -15   -0.28    0.63   1 
   0  10 -14   10.37    1.22   1 
   0  10 -13   18.97    1.39   1 
   0  10 -12  140.97    3.14   1 
   0  10 -11  208.08    3.40   1 
   0 -10   5   18.53    1.05   1 
   0 -10   4   10.09    0.97   1 
   0 -10   3  319.12    5.47   1 
   0 -10   2   77.90    2.92   1 
   0 -10   1  399.68    7.31   1 
   0 -10   0  230.95    5.72   1 
   0 -10  -1   41.83    2.62   1 
   0 -10  -2   78.88    3.73   1 
   0 -10  -3    1.97    0.94   1 
   0 -10  -4    1.84    0.97   1 
   0 -10  -5    0.05    0.82   1 
   0 -10  -6   35.39    3.09   1 
   0 -10  -7   13.63    2.28   1 
   0 -10  -8   61.08    4.21   1 
   0 -10  -9   13.94    2.45   1 
   0 -10 -10    2.68    1.50   1 
   0 -10 -11    5.96    1.94   1 
   0 -10 -12   44.50    4.19   1 
   0 -10 -13   16.90    3.07   1 
   0 -10 -14    2.46    1.77   1 
   0 -10 -15   10.21    2.73   1 
   0 -10 -16    4.46    2.18   1 
   0 -10 -17    3.51    2.16   1 
   0 -10 -18    1.37    2.02   1 
   0 -10 -19    7.95    2.91   1 
   0 -10 -20    1.95    2.33   1 
   0 -10 -21   49.94    5.95   1 
   0  11 -18    6.84    1.37   1 
   0  11 -17    3.05    0.97   1 
   0  11 -16   33.53    2.14   1 
   0  11 -15   -0.04    0.62   1 
   0  11 -14    9.67    1.11   1 
   0  11 -13   22.03    1.33   1 
   0  11 -12    0.05    0.40   1 
   0 -11   6  117.31    2.32   1 
   0 -11   5  105.90    2.57   1 
   0 -11   4    5.91    0.88   1 
   0 -11   3    4.79    0.89   1 
   0 -11   2    6.30    1.05   1 
   0 -11   1   34.99    2.22   1 
   0 -11   0   44.45    2.65   1 
   0 -11  -1   92.97    3.99   1 
   0 -11  -2    9.72    1.59   1 
   0 -11  -3  525.84   10.55   1 
   0 -11  -4    6.23    1.49   1 
   0 -11  -5  276.17    8.24   1 
   0 -11  -6    2.32    1.26   1 
   0 -11  -7   76.39    4.66   1 
   0 -11  -8    0.29    1.00   1 
   0 -11  -9   61.55    4.57   1 
   0 -11 -10   79.78    5.36   1 
   0 -11 -11  116.68    6.59   1 
   0 -11 -12    0.42    1.50   1 
   0 -11 -13  178.52    8.75   1 
   0 -11 -14    2.36    1.75   1 
   0 -11 -15   60.20    5.46   1 
   0 -11 -16    7.60    2.65   1 
   0 -11 -17    4.15    2.37   1 
   0 -11 -18   -0.22    2.01   1 
   0 -11 -19   23.31    4.33   1 
   0 -11 -20   35.93    5.47   1 
   0  12 -13   31.13    1.24   1 
   0 -12   6    0.18    0.38   1 
   0 -12   5   86.11    2.50   1 
   0 -12   4    9.09    1.07   1 
   0 -12   3  265.73    5.49   1 
   0 -12   2   25.67    1.92   1 
   0 -12   1   46.48    2.66   1 
   0 -12   0   15.79    1.75   1 
   0 -12  -1    1.15    0.83   1 
   0 -12  -2    7.14    1.52   1 
   0 -12  -3    1.39    0.92   1 
   0 -12  -4    0.26    0.92   1 
   0 -12  -5   17.68    2.42   1 
   0 -12  -6   10.72    2.08   1 
   0 -12  -7   87.23    5.12   1 
   0 -12  -8    4.17    1.65   1 
   0 -12  -9   12.99    2.58   1 
   0 -12 -10   30.60    3.52   1 
   0 -12 -11    1.22    1.53   1 
   0 -12 -12    7.40    2.39   1 
   0 -12 -13    4.87    2.13   1 
   0 -12 -14   23.45    3.76   1 
   0 -12 -15    0.78    1.80   1 
   0 -12 -16   36.09    4.84   1 
   0 -12 -17    6.90    2.84   1 
   0 -12 -18   17.09    3.84   1 
   0 -12 -19   27.43    4.88   1 
   0 -13   6    9.34    0.91   1 
   0 -13   5    1.85    0.63   1 
   0 -13   4   15.47    1.38   1 
   0 -13   3    8.08    1.18   1 
   0 -13   2   16.81    1.68   1 
   0 -13   1   19.38    1.87   1 
   0 -13   0   33.94    2.51   1 
   0 -13  -1  168.31    5.72   1 
   0 -13  -2   11.22    1.82   1 
   0 -13  -3   85.24    4.49   1 
   0 -13  -4   20.42    2.45   1 
   0 -13  -5    1.59    1.22   1 
   0 -13  -6    1.54    1.20   1 
   0 -13  -7   30.31    3.27   1 
   0 -13  -8  164.92    7.47   1 
   0 -13  -9   50.09    4.33   1 
   0 -13 -10  128.27    7.09   1 
   0 -13 -11   69.63    5.48   1 
   0 -13 -12   14.14    2.98   1 
   0 -13 -13   17.88    3.37   1 
   0 -13 -14   -0.40    1.60   1 
   0 -13 -15    0.18    1.85   1 
   0 -13 -16    9.04    3.08   1 
   0 -13 -17   11.05    3.06   1 
   0 -13 -18   68.38    6.61   1 
   0 -14   7   -0.03    0.40   1 
   0 -14   6    0.90    0.55   1 
   0 -14   5  111.93    3.24   1 
   0 -14   4   28.21    1.88   1 
   0 -14   3   23.70    1.89   1 
   0 -14   2   14.79    1.68   1 
   0 -14   1   20.48    2.03   1 
   0 -14   0   11.25    1.77   1 
   0 -14  -1    0.48    0.91   1 
   0 -14  -2   50.20    3.42   1 
   0 -14  -3   61.31    3.94   1 
   0 -14  -4    5.77    1.71   1 
   0 -14  -5   21.63    2.70   1 
   0 -14  -6    0.54    1.16   1 
   0 -14  -7    0.27    1.22   1 
   0 -14  -8   -0.18    1.25   1 
   0 -14  -9   12.25    2.62   1 
   0 -14 -10    0.27    1.48   1 
   0 -14 -11    1.01    1.61   1 
   0 -14 -12    1.05    1.65   1 
   0 -14 -13   20.32    3.57   1 
   0 -14 -14    3.52    2.28   1 
   0 -14 -15    2.95    2.35   1 
   0 -14 -16    5.10    2.57   1 
   0 -14 -17   15.11    3.77   1 
   0 -15   7   34.98    1.54   1 
   0 -15   6   77.73    2.57   1 
   0 -15   5    0.28    0.61   1 
   0 -15   4   12.73    1.46   1 
   0 -15   3   60.50    2.97   1 
   0 -15   2   -0.19    0.71   1 
   0 -15   1   38.02    2.70   1 
   0 -15   0   73.32    3.86   1 
   0 -15  -1   10.57    1.85   1 
   0 -15  -2   98.66    4.89   1 
   0 -15  -3   11.22    2.13   1 
   0 -15  -4    7.04    1.89   1 
   0 -15  -5   18.20    2.76   1 
   0 -15  -6    3.99    1.64   1 
   0 -15  -7    0.51    1.33   1 
   0 -15  -8   41.14    4.12   1 
   0 -15  -9   34.81    3.94   1 
   0 -15 -10   -0.16    1.44   1 
   0 -15 -11   12.73    2.88   1 
   0 -15 -12    0.21    1.74   1 
   0 -15 -13    0.48    1.77   1 
   0 -15 -14    4.10    2.48   1 
   0 -15 -15    2.11    2.26   1 
   0 -15 -16   43.49    5.40   1 
   0 -16   6   28.24    1.75   1 
   0 -16   5    0.39    0.66   1 
   0 -16   4  120.47    4.05   1 
   0 -16   3  141.87    4.71   1 
   0 -16   2    2.30    1.05   1 
   0 -16   1   75.38    3.90   1 
   0 -16   0   42.58    3.13   1 
   0 -16  -1    0.48    1.07   1 
   0 -16  -2    0.56    1.14   1 
   0 -16  -3    2.41    1.42   1 
   0 -16  -4    1.89    1.36   1 
   0 -16  -5   72.70    4.86   1 
   0 -16  -6    0.76    1.39   1 
   0 -16  -7   78.05    5.50   1 
   0 -16  -8    0.14    1.46   1 
   0 -16  -9   36.20    4.08   1 
   0 -16 -10   13.64    2.95   1 
   0 -16 -11    9.94    2.73   1 
   0 -16 -12    3.19    2.23   1 
   0 -16 -13   26.15    4.31   1 
   0 -16 -14    9.52    3.04   1 
   0 -16 -15   55.10    5.95   1 
   0 -17   4   -0.18    0.72   1 
   0 -17   3   90.93    3.94   1 
   0 -17   2   13.20    1.87   1 
   0 -17   1  123.38    5.02   1 
   0 -17   0   94.21    4.63   1 
   0 -17  -1   18.83    2.52   1 
   0 -17  -2   96.83    5.18   1 
   0 -17  -3    1.27    1.31   1 
   0 -17  -4    1.95    1.49   1 
   0 -17  -5   36.54    3.72   1 
   0 -17  -6   -0.08    1.30   1 
   0 -17  -7   80.45    5.71   1 
   0 -17  -8    3.45    1.87   1 
   0 -17  -9   47.50    4.69   1 
   0 -17 -10   13.27    3.12   1 
   0 -17 -11    5.97    2.67   1 
   0 -17 -12   -0.94    1.92   1 
   0 -17 -13    0.73    2.16   1 
   0 -17 -14    4.29    2.64   1 
   0 -18   2    7.90    1.60   1 
   0 -18   1    3.97    1.42   1 
   0 -18   0    8.29    1.84   1 
   0 -18  -1    0.12    1.21   1 
   0 -18  -2   19.36    2.77   1 
   0 -18  -3   33.59    3.46   1 
   0 -18  -4    1.56    1.38   1 
   0 -18  -5   57.74    4.69   1 
   0 -18  -6    0.11    1.51   1 
   0 -18  -7   11.88    2.79   1 
   0 -18  -8    8.15    2.47   1 
   0 -18  -9   12.57    3.07   1 
   0 -18 -10    4.57    2.38   1 
   0 -18 -11   22.69    3.97   1 
   0 -18 -12   25.24    4.29   1 
   0 -18 -13   46.47    5.54   1 
   0 -19  -1   16.70    2.59   1 
   0 -19  -2    7.17    1.94   1 
   0 -19  -3   27.32    3.25   1 
   0 -19  -4   18.34    3.01   1 
   0 -19  -5   70.97    5.30   1 
   0 -19  -6   -0.07    1.63   1 
   0 -19  -7   47.15    4.74   1 
   0 -19  -8    6.98    2.54   1 
   0 -19  -9   10.03    2.94   1 
   0 -19 -10    0.02    2.02   1 
   0 -19 -11    7.04    2.88   1 
   0 -20  -5    2.35    1.75   1 
   0 -20  -6    7.35    2.62   1 
   0 -20  -7   -0.76    1.76   1 
   0 -20  -8    7.86    2.71   1 
   0 -20  -9    9.15    3.10   1 
   0 -20 -10   31.73    4.74   1 
   1 -20 -10   13.58    3.51   1 
   1 -20  -9    0.18    2.16   1 
   1 -20  -8   22.07    3.75   1 
   1 -20  -7   13.61    3.08   1 
   1 -19 -12   18.13    3.79   1 
   1 -19 -11    2.92    2.41   1 
   1 -19 -10   11.28    3.00   1 
   1 -19  -9   15.25    3.30   1 
   1 -19  -8    9.04    2.82   1 
   1 -19  -7   61.11    5.15   1 
   1 -19  -6   11.79    2.69   1 
   1 -19  -5  108.71    6.32   1 
   1 -19  -4   57.78    4.59   1 
   1 -19  -3   14.07    2.57   1 
   1 -18 -13    9.09    3.15   1 
   1 -18 -12    5.99    2.63   1 
   1 -18 -11    0.39    2.19   1 
   1 -18 -10   13.79    3.36   1 
   1 -18  -9    0.03    1.83   1 
   1 -18  -8    1.53    1.75   1 
   1 -18  -7    1.01    1.81   1 
   1 -18  -6    1.97    1.67   1 
   1 -18  -5    8.03    2.27   1 
   1 -18  -4    2.27    1.61   1 
   1 -18  -3    1.25    1.43   1 
   1 -18  -2   14.19    2.39   1 
   1 -18  -1   69.97    4.30   1 
   1 -18   0   14.73    2.24   1 
   1 -17 -14   32.46    4.96   1 
   1 -17 -13    1.71    2.23   1 
   1 -17 -12   29.05    4.48   1 
   1 -17 -11    0.00    1.92   1 
   1 -17 -10    1.90    1.85   1 
   1 -17  -9  110.21    6.99   1 
   1 -17  -8    2.76    1.89   1 
   1 -17  -7   84.83    5.70   1 
   1 -17  -6   24.25    3.29   1 
   1 -17  -5   35.06    3.53   1 
   1 -17  -4    0.84    1.15   1 
   1 -17  -3    3.44    1.50   1 
   1 -17  -2   23.66    2.68   1 
   1 -17  -1   37.71    3.12   1 
   1 -17   0    0.37    0.91   1 
   1 -17   1  191.57    6.15   1 
   1 -17   2   24.89    2.25   1 
   1 -17   3   79.52    3.54   1 
   1 -16 -15    5.23    2.77   1 
   1 -16 -14   -0.93    1.99   1 
   1 -16 -13    0.40    2.06   1 
   1 -16 -12   -0.51    1.69   1 
   1 -16 -11    0.41    1.91   1 
   1 -16 -10   10.01    2.60   1 
   1 -16  -9    1.49    1.62   1 
   1 -16  -8   28.90    3.85   1 
   1 -16  -7   15.05    2.81   1 
   1 -16  -6   31.57    3.51   1 
   1 -16  -5    1.21    1.42   1 
   1 -16  -4    4.76    1.63   1 
   1 -16  -3   16.11    2.45   1 
   1 -16  -2   -0.01    0.99   1 
   1 -16  -1   75.36    4.16   1 
   1 -16   0    2.08    1.09   1 
   1 -16   1   38.11    2.72   1 
   1 -16   2    0.25    0.77   1 
   1 -16   3    2.46    0.98   1 
   1 -16   4   76.63    3.04   1 
   1 -15 -16   66.78    6.46   1 
   1 -15 -15    1.39    2.18   1 
   1 -15 -14   14.66    3.46   1 
   1 -15 -13    5.04    2.43   1 
   1 -15 -12    3.87    2.12   1 
   1 -15 -11    0.60    1.62   1 
   1 -15 -10   25.71    3.70   1 
   1 -15  -9   27.13    3.79   1 
   1 -15  -8   47.83    4.34   1 
   1 -15  -7   25.55    3.17   1 
   1 -15  -6    1.77    1.33   1 
   1 -15  -5    0.92    1.28   1 
   1 -15  -4   17.19    2.47   1 
   1 -15  -3    1.88    1.24   1 
   1 -15  -2   60.90    3.79   1 
   1 -15  -1    0.23    0.88   1 
   1 -15   0   17.79    2.01   1 
   1 -15   1    5.39    1.24   1 
   1 -15   2   -0.39    0.69   1 
   1 -15   3   -0.41    0.64   1 
   1 -15   4   -0.17    0.55   1 
   1 -15   5   24.13    1.57   1 
   1 -15   6    7.23    0.91   1 
   1 -14 -18   14.26    3.79   1 
   1 -14 -17    2.17    2.36   1 
   1 -14 -16    0.69    2.27   1 
   1 -14 -15    0.51    2.03   1 
   1 -14 -14    0.11    1.81   1 
   1 -14 -13   18.63    3.53   1 
   1 -14 -12   12.37    2.95   1 
   1 -14 -11    4.09    1.91   1 
   1 -14 -10   89.87    6.12   1 
   1 -14  -9    0.48    1.43   1 
   1 -14  -8   76.73    5.23   1 
   1 -14  -7   55.22    4.35   1 
   1 -14  -6    4.96    1.68   1 
   1 -14  -5   39.07    3.37   1 
   1 -14  -4   12.82    2.14   1 
   1 -14  -3  104.30    4.99   1 
   1 -14  -2  115.66    5.02   1 
   1 -14  -1  110.91    4.67   1 
   1 -14   0   82.94    3.84   1 
   1 -14   1   24.93    2.11   1 
   1 -14   2   11.20    1.40   1 
   1 -14   3    4.52    1.00   1 
   1 -14   4    4.22    0.86   1 
   1 -14   5   38.91    1.79   1 
   1 -13 -18   67.57    6.57   1 
   1 -13 -17    0.88    2.24   1 
   1 -13 -16   24.71    4.28   1 
   1 -13 -15   11.34    3.09   1 
   1 -13 -14   16.53    3.39   1 
   1 -13 -13    0.60    1.63   1 
   1 -13 -12   34.90    4.12   1 
   1 -13 -11   93.90    6.28   1 
   1 -13 -10  174.82    8.18   1 
   1 -13  -9   13.63    2.60   1 
   1 -13  -8   36.78    3.65   1 
   1 -13  -7    1.60    1.22   1 
   1 -13  -6    0.30    1.02   1 
   1 -13  -5    0.67    1.03   1 
   1 -13  -4    1.88    1.10   1 
   1 -13  -3   10.16    1.85   1 
   1 -13  -2    3.63    1.18   1 
   1 -13  -1    0.85    0.77   1 
   1 -13   0   23.43    2.05   1 
   1 -13   1   41.74    2.51   1 
   1 -13   2   21.16    1.73   1 
   1 -13   3  324.18    6.01   1 
   1 -13   4    1.33    0.57   1 
   1 -13   5   23.24    1.31   1 
   1 -12 -19    2.08    2.45   1 
   1 -12 -18   -0.03    2.15   1 
   1 -12 -17    0.17    1.89   1 
   1 -12 -16    6.46    2.62   1 
   1 -12 -15    6.01    2.46   1 
   1 -12 -14    0.77    1.57   1 
   1 -12 -13    3.15    1.88   1 
   1 -12 -12   14.60    2.98   1 
   1 -12 -11   63.33    5.08   1 
   1 -12 -10    4.24    1.79   1 
   1 -12  -9  150.25    7.17   1 
   1 -12  -8    1.67    1.30   1 
   1 -12  -7  159.94    6.90   1 
   1 -12  -6    0.51    1.07   1 
   1 -12  -5   58.60    3.94   1 
   1 -12  -4    0.48    0.89   1 
   1 -12  -3  129.16    5.27   1 
   1 -12  -2   28.44    2.44   1 
   1 -12  -1  229.62    6.32   1 
   1 -12   0   40.74    2.54   1 
   1 -12   1  138.43    4.27   1 
   1 -12   2    2.42    0.77   1 
   1 -12   3  306.37    5.53   1 
   1 -12   4    5.50    0.80   1 
   1 -12   5   94.77    2.31   1 
   1 -11 -20   33.63    5.21   1 
   1 -11 -19   29.49    4.70   1 
   1 -11 -18    3.98    2.43   1 
   1 -11 -17    1.85    2.10   1 
   1 -11 -16   -0.19    1.75   1 
   1 -11 -15   48.52    5.01   1 
   1 -11 -14    0.31    1.55   1 
   1 -11 -13  130.39    7.51   1 
   1 -11 -12   29.25    3.65   1 
   1 -11 -11   54.01    4.60   1 
   1 -11 -10   43.47    4.02   1 
   1 -11  -9    8.51    2.08   1 
   1 -11  -8   -0.49    0.97   1 
   1 -11  -7   21.84    2.65   1 
   1 -11  -6    4.13    1.44   1 
   1 -11  -5   79.96    4.44   1 
   1 -11  -4    0.58    0.90   1 
   1 -11  -3  133.21    5.18   1 
   1 -11  -2   61.27    3.36   1 
   1 -11  -1    8.64    1.39   1 
   1 -11   0   77.17    3.31   1 
   1 -11   1  127.31    3.90   1 
   1 -11   2    4.63    0.89   1 
   1 -11   3  294.77    5.10   1 
   1 -11   4   38.44    1.59   1 
   1 -11   5   -0.06    0.33   1 
  -1  11 -13  123.50    2.84   1 
  -1  11 -14    5.76    0.96   1 
  -1  11 -15   10.50    1.26   1 
  -1  11 -16   19.70    1.74   1 
   1 -10 -21   18.02    4.21   1 
   1 -10 -20   -0.01    2.20   1 
   1 -10 -19    8.13    3.00   1 
   1 -10 -18    4.49    2.57   1 
   1 -10 -17    0.02    1.80   1 
   1 -10 -16    1.31    1.73   1 
   1 -10 -15   -0.01    1.29   1 
   1 -10 -14    4.44    1.92   1 
   1 -10 -13    1.06    1.45   1 
   1 -10 -12    0.18    1.30   1 
   1 -10 -11   13.22    2.48   1 
   1 -10 -10    2.64    1.49   1 
   1 -10  -9   67.08    4.66   1 
   1 -10  -8   36.45    3.39   1 
   1 -10  -7   70.08    4.42   1 
   1 -10  -6   32.88    2.97   1 
   1 -10  -5   82.09    4.36   1 
   1 -10  -4    2.90    1.08   1 
   1 -10  -3   24.57    2.23   1 
   1 -10  -2   28.72    2.29   1 
   1 -10  -1   64.94    3.12   1 
   1 -10   0  198.95    5.06   1 
   1 -10   1  281.45    5.57   1 
   1 -10   2    5.35    0.85   1 
   1 -10   3  307.11    4.84   1 
   1 -10   4    0.00    0.34   1 
  -1  10 -11  135.11    2.59   1 
  -1  10 -12   26.53    1.41   1 
  -1  10 -13   20.12    1.41   1 
  -1  10 -14   69.44    2.66   1 
  -1  10 -15    0.37    0.68   1 
  -1  10 -16    0.39    0.75   1 
  -1  10 -17   10.86    1.57   1 
  -1  10 -18    6.09    1.37   1 
  -1  10 -19   14.37    1.91   1 
   1  -9 -22   17.05    4.14   1 
   1  -9 -21    0.39    2.16   1 
   1  -9 -20    0.19    2.14   1 
   1  -9 -19    4.58    2.59   1 
   1  -9 -18    6.09    2.59   1 
   1  -9 -17   48.18    5.02   1 
   1  -9 -16    7.49    2.36   1 
   1  -9 -15  134.64    7.72   1 
   1  -9 -14   33.63    3.87   1 
   1  -9 -13   64.70    5.13   1 
   1  -9 -12   -0.02    1.26   1 
   1  -9 -11   12.87    2.41   1 
   1  -9 -10   25.33    3.04   1 
   1  -9  -9    0.22    1.06   1 
   1  -9  -8    2.36    1.26   1 
   1  -9  -7  180.57    6.83   1 
   1  -9  -6   13.26    2.03   1 
   1  -9  -5  222.74    6.92   1 
   1  -9  -4    1.85    0.89   1 
   1  -9  -3   95.95    4.09   1 
   1  -9  -2   28.61    2.17   1 
   1  -9  -1   22.06    1.81   1 
   1  -9   0    7.89    1.13   1 
   1  -9   1    3.50    0.74   1 
   1  -9   2  122.59    3.06   1 
   1  -9   3  333.18    4.72   1 
   1  -9   4   26.60    1.06   1 
  -1   9 -10    2.91    0.54   1 
  -1   9 -11    8.87    0.87   1 
  -1   9 -12   10.39    1.06   1 
  -1   9 -13   38.67    2.04   1 
  -1   9 -14  170.99    4.56   1 
  -1   9 -15   11.87    1.51   1 
  -1   9 -16  197.87    5.56   1 
  -1   9 -17   96.48    4.15   1 
  -1   9 -18   87.49    4.18   1 
  -1   9 -19    8.13    1.69   1 
  -1   9 -20   14.35    2.17   1 
  -1   9 -21    1.88    1.33   1 
  -1   9 -22   50.84    3.88   1 
   1  -8 -23    8.69    3.34   1 
   1  -8 -22   14.19    3.74   1 
   1  -8 -21    1.69    2.05   1 
   1  -8 -20    0.11    1.98   1 
   1  -8 -19   -1.33    1.72   1 
   1  -8 -18   14.88    3.34   1 
   1  -8 -17    6.90    2.44   1 
   1  -8 -16   36.87    4.31   1 
   1  -8 -15    2.54    1.78   1 
   1  -8 -14    3.99    1.90   1 
   1  -8 -13   -0.54    1.16   1 
   1  -8 -12    0.01    1.04   1 
   1  -8 -11    4.52    1.68   1 
   1  -8 -10  130.61    6.32   1 
   1  -8  -9   23.80    2.79   1 
   1  -8  -8    8.11    1.78   1 
   1  -8  -7   28.13    2.71   1 
   1  -8  -6   10.74    1.80   1 
   1  -8  -5    4.16    1.16   1 
   1  -8  -4  276.63    7.09   1 
   1  -8  -3    4.10    1.03   1 
   1  -8  -2  338.86    6.98   1 
   1  -8  -1   47.38    2.41   1 
   1  -8   0   76.18    2.78   1 
   1  -8   1   73.90    2.45   1 
   1  -8   2   16.95    1.10   1 
   1  -8   3   71.48    1.87   1 
   1  -8   4  382.01    4.75   1 
  -1   8  -9  204.39    3.31   1 
  -1   8 -10  108.94    2.68   1 
  -1   8 -11   76.74    2.52   1 
  -1   8 -12   99.00    3.15   1 
  -1   8 -13    2.73    0.82   1 
  -1   8 -14   99.43    3.68   1 
  -1   8 -15    0.33    0.71   1 
  -1   8 -16   64.51    3.36   1 
  -1   8 -17   18.65    2.07   1 
  -1   8 -18    1.21    1.03   1 
  -1   8 -19   41.24    3.20   1 
  -1   8 -20    5.38    1.57   1 
  -1   8 -21    2.17    1.35   1 
  -1   8 -22    7.63    2.05   1 
  -1   8 -23    1.37    1.55   1 
  -1   8 -24    1.59    1.59   1 
   1  -7 -23    1.42    2.26   1 
   1  -7 -22   26.48    4.59   1 
   1  -7 -21    1.25    2.20   1 
   1  -7 -20    3.37    2.30   1 
   1  -7 -19   16.13    3.45   1 
   1  -7 -18    2.68    1.94   1 
   1  -7 -17   95.14    6.68   1 
   1  -7 -16    0.79    1.28   1 
   1  -7 -15   31.45    3.71   1 
   1  -7 -14    0.06    1.04   1 
   1  -7 -13   -0.60    1.03   1 
   1  -7 -12   21.48    3.03   1 
   1  -7 -11   50.84    4.04   1 
   1  -7 -10   54.17    4.06   1 
   1  -7  -9    0.19    0.94   1 
   1  -7  -8   64.97    4.07   1 
   1  -7  -7   72.41    4.07   1 
   1  -7  -6   -0.12    0.61   1 
   1  -7  -5   33.54    2.52   1 
   1  -7  -4   19.43    1.85   1 
   1  -7  -3   11.01    1.43   1 
   1  -7  -2   49.34    2.52   1 
   1  -7  -1    1.45    0.59   1 
   1  -7   0  213.39    4.40   1 
   1  -7   1  134.85    3.09   1 
   1  -7   2   26.37    1.20   1 
   1  -7   3  183.35    2.88   1 
  -1   7  -7    7.32    0.55   1 
  -1   7  -8    6.43    0.65   1 
  -1   7  -9   17.77    1.12   1 
  -1   7 -10    5.84    0.85   1 
  -1   7 -11   41.27    2.06   1 
  -1   7 -12   64.18    2.74   1 
  -1   7 -13   35.53    2.24   1 
  -1   7 -14  329.61    7.24   1 
  -1   7 -15    0.45    0.74   1 
  -1   7 -16  270.01    7.23   1 
  -1   7 -17   15.11    2.04   1 
  -1   7 -18   97.57    4.75   1 
  -1   7 -19   61.03    3.96   1 
  -1   7 -20   33.60    3.22   1 
  -1   7 -21   32.24    3.19   1 
  -1   7 -22   71.90    4.83   1 
  -1   7 -23   10.01    2.47   1 
  -1   7 -24   57.57    4.72   1 
  -1   7 -25    3.46    1.82   1 
  -1   7 -26   13.36    2.83   1 
   1  -6 -24   19.04    4.32   1 
   1  -6 -23    4.07    2.61   1 
   1  -6 -22    0.20    1.95   1 
   1  -6 -21   24.38    4.25   1 
   1  -6 -20    7.86    2.61   1 
   1  -6 -19   27.40    4.27   1 
   1  -6 -18   35.92    4.27   1 
   1  -6 -17   28.87    4.01   1 
   1  -6 -16   73.17    5.58   1 
   1  -6 -15   17.88    3.00   1 
   1  -6 -14    7.98    2.10   1 
   1  -6 -13   37.74    3.72   1 
   1  -6 -12    8.45    1.97   1 
   1  -6 -11   15.11    2.46   1 
   1  -6 -10    0.03    0.81   1 
   1  -6  -9   83.17    4.63   1 
   1  -6  -8  126.81    5.46   1 
   1  -6  -7   41.33    2.99   1 
   1  -6  -6    0.63    0.68   1 
   1  -6  -5    9.97    1.52   1 
   1  -6  -4   84.67    3.57   1 
   1  -6  -3   69.02    3.03   1 
   1  -6  -2   95.93    3.30   1 
   1  -6  -1  106.41    3.15   1 
   1  -6   0    1.21    0.46   1 
   1  -6   1  122.25    2.70   1 
   1  -6   2  190.06    3.07   1 
   1  -6   3  149.69    2.36   1 
  -1   6  -6  152.30    2.53   1 
  -1   6  -7   66.93    1.84   1 
  -1   6  -8  203.79    3.78   1 
  -1   6  -9   79.10    2.54   1 
  -1   6 -10   10.59    1.17   1 
  -1   6 -11   75.55    2.97   1 
  -1   6 -12  251.09    5.81   1 
  -1   6 -13   71.14    3.30   1 
  -1   6 -14  300.62    7.21   1 
  -1   6 -15   12.15    1.77   1 
  -1   6 -16   90.95    4.41   1 
  -1   6 -17    5.41    1.42   1 
  -1   6 -18    7.95    1.74   1 
  -1   6 -19    0.78    1.09   1 
  -1   6 -20   25.17    2.84   1 
  -1   6 -21    2.35    1.49   1 
  -1   6 -22    0.47    1.26   1 
  -1   6 -23   -0.09    1.37   1 
  -1   6 -24   27.07    3.67   1 
  -1   6 -25   35.64    4.13   1 
  -1   6 -26    1.65    1.97   1 
  -1   6 -27   50.76    5.06   1 
   1  -5 -25    4.59    2.79   1 
   1  -5 -24   39.24    5.60   1 
   1  -5 -23    1.88    2.28   1 
   1  -5 -22    7.51    2.81   1 
   1  -5 -21    2.38    2.11   1 
   1  -5 -20   30.03    4.42   1 
   1  -5 -19  109.05    7.27   1 
   1  -5 -18   38.20    4.31   1 
   1  -5 -17   32.56    4.15   1 
   1  -5 -16   23.32    3.50   1 
   1  -5 -15    2.81    1.57   1 
   1  -5 -14    1.82    1.38   1 
   1  -5 -13  151.23    6.99   1 
   1  -5 -12    6.57    1.80   1 
   1  -5 -11   39.95    3.42   1 
   1  -5 -10   11.18    1.94   1 
   1  -5  -9   -0.13    0.71   1 
   1  -5  -8   41.00    3.06   1 
   1  -5  -7    6.11    1.36   1 
   1  -5  -6   38.37    2.63   1 
   1  -5  -5  234.15    6.10   1 
   1  -5  -4    9.77    1.30   1 
   1  -5  -3   77.42    3.04   1 
   1  -5  -2   91.10    3.01   1 
   1  -5  -1   16.32    1.18   1 
   1  -5   0   38.42    1.58   1 
   1  -5   1  223.57    3.50   1 
   1  -5   2   46.66    1.26   1 
   1  -5   3  191.81    3.00   1 
  -1   5  -4    7.79    0.50   1 
  -1   5  -4    7.66    0.44   1 
  -1   5  -5  154.88    2.63   1 
  -1   5  -6    7.23    0.73   1 
  -1   5  -7   98.41    2.60   1 
  -1   5  -8    2.23    0.61   1 
  -1   5  -9    3.30    0.81   1 
  -1   5 -10   43.68    2.29   1 
  -1   5 -11   29.01    2.03   1 
  -1   5 -12  282.40    6.57   1 
  -1   5 -13    0.08    0.61   1 
  -1   5 -14   30.37    2.48   1 
  -1   5 -15    7.41    1.49   1 
  -1   5 -16   32.33    2.81   1 
  -1   5 -17  114.34    5.29   1 
  -1   5 -18   58.80    4.04   1 
  -1   5 -19   79.51    4.86   1 
  -1   5 -20   60.91    4.39   1 
  -1   5 -21   15.08    2.61   1 
  -1   5 -22   34.38    3.65   1 
  -1   5 -23   49.48    4.48   1 
  -1   5 -24    2.34    1.85   1 
  -1   5 -25   31.30    4.14   1 
  -1   5 -26    1.23    2.05   1 
  -1   5 -27   58.60    5.44   1 
  -1   5 -28    3.81    2.36   1 
   1  -4 -25    1.34    2.49   1 
   1  -4 -24    2.69    2.36   1 
   1  -4 -23   36.04    5.04   1 
   1  -4 -22    2.12    2.20   1 
   1  -4 -21   57.64    5.60   1 
   1  -4 -20   15.17    3.19   1 
   1  -4 -19   80.26    6.21   1 
   1  -4 -18   25.98    3.77   1 
   1  -4 -17  101.88    6.49   1 
   1  -4 -16   28.41    3.49   1 
   1  -4 -15   78.24    5.33   1 
   1  -4 -14   -0.09    0.96   1 
   1  -4 -13  343.26   10.32   1 
   1  -4 -12    0.99    1.09   1 
   1  -4 -11  362.13    9.88   1 
   1  -4 -10   89.14    4.71   1 
   1  -4  -9  185.72    6.48   1 
   1  -4  -8    0.29    0.72   1 
   1  -4  -7  127.74    4.84   1 
   1  -4  -6   15.85    1.69   1 
   1  -4  -5  718.99   10.68   1 
   1  -4  -4   12.89    1.36   1 
   1  -4  -3  726.88    9.39   1 
   1  -4  -2    2.14    0.58   1 
   1  -4  -1   34.86    1.55   1 
   1  -4   0  104.22    2.35   1 
   1  -4   1   44.66    1.33   1 
   1  -4   2   16.25    0.67   1 
   1  -4   3    0.79    0.23   1 
  -1   4  -4   44.89    1.30   1 
  -1   4  -5   88.86    2.18   1 
  -1   4  -6    4.18    0.73   1 
  -1   4  -7  168.81    3.86   1 
  -1   4  -8   33.60    1.86   1 
  -1   4  -9   39.97    2.25   1 
  -1   4 -10    3.56    0.91   1 
  -1   4 -11  117.16    4.20   1 
  -1   4 -12  274.44    6.80   1 
  -1   4 -13   20.46    2.10   1 
  -1   4 -14    7.33    1.55   1 
  -1   4 -15    0.79    0.94   1 
  -1   4 -16   76.88    4.36   1 
  -1   4 -17   17.47    2.43   1 
  -1   4 -18   64.42    4.40   1 
  -1   4 -19   60.60    4.42   1 
  -1   4 -20    7.71    2.13   1 
  -1   4 -21    1.16    1.37   1 
  -1   4 -22    3.04    1.74   1 
  -1   4 -23   13.98    2.80   1 
  -1   4 -24    0.36    1.56   1 
  -1   4 -25   52.10    5.07   1 
  -1   4 -26    1.12    1.92   1 
  -1   4 -27   17.44    3.71   1 
  -1   4 -28    0.57    2.15   1 
   1  -3 -26   10.87    3.49   1 
   1  -3 -25    5.15    2.75   1 
   1  -3 -24    1.88    2.28   1 
   1  -3 -23    4.93    2.38   1 
   1  -3 -22    1.56    1.93   1 
   1  -3 -21   77.03    6.29   1 
   1  -3 -20    9.81    2.62   1 
   1  -3 -19   42.01    4.52   1 
   1  -3 -18   88.87    6.11   1 
   1  -3 -17    5.74    2.04   1 
   1  -3 -16  132.28    6.95   1 
   1  -3 -15    0.41    1.03   1 
   1  -3 -14    3.27    1.49   1 
   1  -3 -13   35.91    3.28   1 
   1  -3 -12    2.93    1.30   1 
   1  -3 -11   84.76    4.63   1 
   1  -3 -10   55.86    3.60   1 
   1  -3  -9    1.49    0.89   1 
   1  -3  -8  265.51    7.11   1 
   1  -3  -7  137.26    4.82   1 
   1  -3  -6  224.74    5.82   1 
   1  -3  -5   55.98    2.68   1 
   1  -3  -4   56.92    2.49   1 
   1  -3  -3   65.27    2.41   1 
   1  -3  -2   58.72    2.06   1 
   1  -3  -1    1.24    0.38   1 
   1  -3   0  342.08    4.44   1 
   1  -3   1  318.66    4.08   1 
   1  -3   2 1115.02   12.27   1 
  -1   3  -3  234.05    3.36   1 
  -1   3  -4   20.78    1.07   1 
  -1   3  -5  499.27    6.36   1 
  -1   3  -6   12.90    1.18   1 
  -1   3  -7   17.18    1.41   1 
  -1   3  -8   42.41    2.29   1 
  -1   3  -9   19.43    1.73   1 
  -1   3 -10  508.26    9.12   1 
  -1   3 -11  113.61    4.35   1 
  -1   3 -12  159.75    5.45   1 
  -1   3 -13   38.49    2.84   1 
  -1   3 -14   34.62    2.85   1 
  -1   3 -15   32.29    2.87   1 
  -1   3 -16    3.08    1.31   1 
  -1   3 -17   17.29    2.54   1 
  -1   3 -18   29.72    3.10   1 
  -1   3 -19   10.22    2.25   1 
  -1   3 -20    3.04    1.60   1 
  -1   3 -21    0.60    1.38   1 
  -1   3 -22    1.03    1.53   1 
  -1   3 -23   30.51    4.06   1 
  -1   3 -24    6.34    2.25   1 
  -1   3 -25   21.55    3.70   1 
  -1   3 -26    4.19    2.31   1 
  -1   3 -27   16.88    3.72   1 
  -1   3 -28    0.79    2.58   1 
   1  -2 -27    0.40    2.64   1 
   1  -2 -26    8.35    3.06   1 
   1  -2 -25    7.36    2.87   1 
   1  -2 -24    5.64    2.59   1 
   1  -2 -23   20.21    3.85   1 
   1  -2 -22    0.52    1.66   1 
   1  -2 -21   55.71    5.29   1 
   1  -2 -20    2.64    1.78   1 
   1  -2 -19  120.12    7.16   1 
   1  -2 -18   53.74    4.70   1 
   1  -2 -17   17.14    2.87   1 
   1  -2 -16   76.30    5.22   1 
   1  -2 -15  105.25    5.80   1 
   1  -2 -14    4.20    1.56   1 
   1  -2 -13  143.95    6.31   1 
   1  -2 -12    3.22    1.25   1 
   1  -2 -11  145.66    5.82   1 
   1  -2 -10   48.12    3.26   1 
   1  -2  -9  387.57    8.74   1 
   1  -2  -8  432.34    8.77   1 
   1  -2  -7  443.87    8.38   1 
   1  -2  -6  383.85    7.28   1 
   1  -2  -5  292.96    5.85   1 
   1  -2  -4  152.42    3.80   1 
   1  -2  -3  487.24    6.62   1 
   1  -2  -2   45.67    1.66   1 
   1  -2  -1    8.23    0.66   1 
   1  -2   0   35.33    1.12   1 
   1  -2   1   69.06    1.49   1 
   1  -2   2  381.04    4.60   1 
  -1   2  -3  255.59    3.77   1 
  -1   2  -4  543.80    6.56   1 
  -1   2  -5  292.36    5.03   1 
  -1   2  -6   28.74    1.80   1 
  -1   2  -7   80.57    3.09   1 
  -1   2  -8    0.61    0.62   1 
  -1   2  -9   72.03    3.29   1 
  -1   2 -10  149.15    5.03   1 
  -1   2 -11    3.55    1.10   1 
  -1   2 -12    1.02    0.88   1 
  -1   2 -13   96.19    4.59   1 
  -1   2 -14  109.53    5.07   1 
  -1   2 -15   30.06    2.92   1 
  -1   2 -16   70.05    4.43   1 
  -1   2 -17    8.99    2.04   1 
  -1   2 -18   38.32    3.62   1 
  -1   2 -19   19.43    2.95   1 
  -1   2 -20   -0.07    1.22   1 
  -1   2 -21    1.50    1.50   1 
  -1   2 -22    9.91    2.55   1 
  -1   2 -23   68.34    5.61   1 
  -1   2 -24   18.36    3.46   1 
  -1   2 -25   32.30    4.48   1 
  -1   2 -26    5.29    2.64   1 
  -1   2 -27    4.16    2.82   1 
  -1   2 -28    0.74    2.34   1 
   1  -1 -27    3.64    2.69   1 
   1  -1 -26    4.14    2.62   1 
   1  -1 -25    0.46    2.07   1 
   1  -1 -24   22.16    3.95   1 
   1  -1 -23   57.69    5.52   1 
   1  -1 -22   10.34    2.81   1 
   1  -1 -21   72.95    5.87   1 
   1  -1 -20   23.39    3.57   1 
   1  -1 -19    0.22    1.37   1 
   1  -1 -18    9.83    2.35   1 
   1  -1 -17   12.78    2.48   1 
   1  -1 -16    4.60    1.63   1 
   1  -1 -15    1.52    1.23   1 
   1  -1 -14   19.80    2.64   1 
   1  -1 -13  373.70    9.85   1 
   1  -1 -12    9.83    1.76   1 
   1  -1 -11  225.18    6.98   1 
   1  -1 -10   30.53    2.51   1 
   1  -1  -9    5.53    1.21   1 
   1  -1  -8   86.96    3.65   1 
   1  -1  -7    0.04    0.49   1 
   1  -1  -6   83.99    3.11   1 
   1  -1  -5   29.31    1.74   1 
   1  -1  -4  119.50    3.15   1 
   1  -1  -3   99.37    2.55   1 
   1  -1  -2  947.04    9.20   1 
   1  -1  -1  131.24    2.41   1 
   1  -1   0 2769.07   24.94   1 
   1  -1   1  329.10    4.20   1 
  -1   1  -2  964.26    9.46   1 
  -1   1  -3    5.75    0.68   1 
  -1   1  -4  462.07    6.32   1 
  -1   1  -5    0.79    0.59   1 
  -1   1  -6  664.92    9.31   1 
  -1   1  -7    0.78    0.63   1 
  -1   1  -8  745.50   11.11   1 
  -1   1  -9    1.16    0.79   1 
  -1   1 -10 1207.22   15.89   1 
  -1   1 -11    5.33    1.32   1 
  -1   1 -12  279.02    7.76   1 
  -1   1 -13   60.34    3.81   1 
  -1   1 -14  134.20    5.78   1 
  -1   1 -15    7.30    1.79   1 
  -1   1 -16  318.84    9.62   1 
  -1   1 -17    5.24    1.71   1 
  -1   1 -18   50.98    4.19   1 
  -1   1 -19    8.09    2.12   1 
  -1   1 -20    9.03    2.36   1 
  -1   1 -21    1.19    1.66   1 
  -1   1 -22    0.58    1.58   1 
  -1   1 -23    4.36    2.25   1 
  -1   1 -24   -0.40    1.76   1 
  -1   1 -25   -1.06    1.74   1 
  -1   1 -26    8.31    3.01   1 
  -1   1 -27   -0.42    2.17   1 
   1   0 -28    2.16    2.77   1 
   1   0 -27    1.13    2.40   1 
   1   0 -26    4.75    2.62   1 
   1   0 -25    2.68    2.23   1 
   1   0 -24   11.68    3.11   1 
   1   0 -23   11.17    2.76   1 
   1   0 -22   14.82    3.07   1 
   1   0 -21   19.85    3.38   1 
   1   0 -20    1.45    1.46   1 
   1   0 -19    5.11    1.92   1 
   1   0 -18   25.70    3.42   1 
   1   0 -17   22.33    3.07   1 
   1   0 -16    2.06    1.28   1 
   1   0 -15   16.57    2.47   1 
   1   0 -14   20.37    2.49   1 
   1   0 -13   25.08    2.60   1 
   1   0 -12   18.18    2.14   1 
   1   0 -11    6.65    1.42   1 
   1   0 -10  257.11    6.79   1 
   1   0  -9   46.12    2.73   1 
   1   0  -8   84.93    3.43   1 
   1   0  -7  834.53   10.82   1 
   1   0  -6   37.13    1.98   1 
   1   0  -5  971.63   10.47   1 
   1   0  -4   23.91    1.28   1 
   1   0  -3    0.77    0.32   1 
   1   0  -2  819.86    8.16   1 
   1   0  -1   10.16    0.62   1 
   1   0   0 1669.73   15.33   1 
  -1   0  -1  131.70    2.55   1 
  -1   0  -2   91.77    2.30   1 
  -1   0  -3 1537.53   13.81   1 
  -1   0  -4   68.70    2.51   1 
  -1   0  -5   42.84    2.22   1 
  -1   0  -6    0.76    0.62   1 
  -1   0  -7    3.44    1.00   1 
  -1   0  -8   19.52    1.89   1 
  -1   0  -9    2.39    0.95   1 
  -1   0 -10   25.28    2.34   1 
  -1   0 -11  278.76    7.74   1 
  -1   0 -12   65.16    3.94   1 
  -1   0 -13  240.87    7.75   1 
  -1   0 -14   85.37    4.80   1 
  -1   0 -15   43.39    3.62   1 
  -1   0 -16   72.63    4.79   1 
  -1   0 -17   11.00    2.32   1 
  -1   0 -18    4.44    1.80   1 
  -1   0 -19   17.46    2.96   1 
  -1   0 -20   40.64    4.17   1 
  -1   0 -21  138.08    7.74   1 
  -1   0 -22   97.15    6.70   1 
  -1   0 -23   82.94    6.42   1 
  -1   0 -24   46.69    5.12   1 
  -1   0 -25   27.65    4.40   1 
  -1   0 -26    4.50    2.69   1 
  -1   0 -27   19.05    4.12   1 
   1   1 -28    1.01    2.54   1 
   1   1 -27    0.94    2.19   1 
   1   1 -26   21.37    4.06   1 
   1   1 -25    9.67    2.85   1 
   1   1 -24   13.65    3.13   1 
   1   1 -23   24.71    3.82   1 
   1   1 -22    2.17    1.77   1 
   1   1 -21   35.83    4.01   1 
   1   1 -20    1.91    1.53   1 
   1   1 -19  145.40    7.25   1 
   1   1 -18   11.48    2.33   1 
   1   1 -17   53.57    4.18   1 
   1   1 -16   36.43    3.32   1 
   1   1 -15   13.32    2.18   1 
   1   1 -14    8.82    1.68   1 
   1   1 -13   10.86    1.82   1 
   1   1 -12    0.45    0.72   1 
   1   1 -11    3.50    1.07   1 
   1   1 -10    1.91    0.75   1 
   1   1  -9    9.53    1.34   1 
   1   1  -8  224.55    5.35   1 
   1   1  -7   40.79    2.11   1 
   1   1  -6  577.53    7.77   1 
   1   1  -5  510.79    6.74   1 
   1   1  -4   62.33    1.96   1 
   1   1  -3    2.43    0.42   1 
   1   1  -2  589.21    6.38   1 
   1   1  -1  120.90    2.27   1 
   1   1   0  161.46    2.76   1 
  -1  -1  -1   10.12    0.80   1 
  -1  -1  -2   67.60    2.17   1 
  -1  -1  -4   48.87    2.31   1 
  -1  -1  -5   40.25    2.31   1 
  -1  -1  -6  178.28    5.05   1 
  -1  -1  -7    4.31    1.05   1 
  -1  -1  -8   87.12    3.94   1 
  -1  -1  -9   16.24    1.97   1 
  -1  -1 -10  264.82    7.55   1 
  -1  -1 -11  113.85    5.12   1 
  -1  -1 -12   80.64    4.49   1 
  -1  -1 -13   47.40    3.61   1 
  -1  -1 -14  107.58    5.53   1 
  -1  -1 -15    8.02    1.90   1 
  -1  -1 -16   37.04    3.60   1 
  -1  -1 -17    3.38    1.55   1 
  -1  -1 -18   12.95    2.60   1 
  -1  -1 -19    5.18    1.84   1 
  -1  -1 -20    1.23    1.63   1 
  -1  -1 -21    5.70    2.34   1 
  -1  -1 -22    6.42    2.43   1 
  -1  -1 -23    1.16    1.85   1 
  -1  -1 -24   17.41    3.70   1 
  -1  -1 -25    2.00    2.32   1 
  -1  -1 -26   20.53    4.18   1 
   1   2 -29    2.93    2.63   1 
   1   2 -28   11.46    3.58   1 
   1   2 -27   19.06    3.92   1 
   1   2 -26   15.55    3.46   1 
   1   2 -25   32.14    4.53   1 
   1   2 -24   37.67    4.33   1 
   1   2 -23   15.92    3.17   1 
   1   2 -22   17.04    3.04   1 
   1   2 -21    5.52    1.90   1 
   1   2 -20    2.35    1.54   1 
   1   2 -19    6.40    1.89   1 
   1   2 -18    0.95    1.18   1 
   1   2 -17   39.75    3.53   1 
   1   2 -16   11.58    2.10   1 
   1   2 -15    0.78    0.96   1 
   1   2 -14    2.28    1.10   1 
   1   2 -13    7.55    1.51   1 
   1   2 -12   52.69    3.16   1 
   1   2 -11    2.93    0.98   1 
   1   2 -10   -0.12    0.51   1 
   1   2  -9   24.97    1.82   1 
   1   2  -8   57.24    2.54   1 
   1   2  -7  151.93    3.79   1 
   1   2  -6   87.96    2.66   1 
   1   2  -5   52.81    1.87   1 
   1   2  -4  105.98    2.39   1 
   1   2  -3  483.25    5.57   1 
   1   2  -2  856.71    8.53   1 
   1   2  -1   54.03    1.55   1 
  -1  -2   0  226.85    3.75   1 
  -1  -2  -1   13.54    1.04   1 
  -1  -2  -2  748.31    8.82   1 
  -1  -2  -4    0.85    0.62   1 
  -1  -2  -5  866.63   11.65   1 
  -1  -2  -6    2.44    0.88   1 
  -1  -2  -7   43.05    2.80   1 
  -1  -2  -8    5.57    1.35   1 
  -1  -2  -9    5.79    1.35   1 
  -1  -2 -10    3.45    1.27   1 
  -1  -2 -11   61.07    3.86   1 
  -1  -2 -12   39.92    3.29   1 
  -1  -2 -13    9.33    1.96   1 
  -1  -2 -14   23.22    2.76   1 
  -1  -2 -15   14.35    2.55   1 
  -1  -2 -16    6.35    1.90   1 
  -1  -2 -17   20.14    3.12   1 
  -1  -2 -18   26.75    3.65   1 
  -1  -2 -19   97.67    6.37   1 
  -1  -2 -20   -0.03    1.54   1 
  -1  -2 -21   72.15    5.93   1 
  -1  -2 -22   13.91    3.18   1 
  -1  -2 -23    4.08    2.38   1 
  -1  -2 -24   -0.89    1.99   1 
  -1  -2 -25   21.12    4.12   1 
  -1  -2 -26    1.88    2.57   1 
   1   3 -29    1.93    2.52   1 
   1   3 -28   -0.08    2.30   1 
   1   3 -27    1.94    2.21   1 
   1   3 -26    4.97    2.41   1 
   1   3 -25   25.63    4.04   1 
   1   3 -24   22.80    3.63   1 
   1   3 -23    0.53    1.49   1 
   1   3 -22   25.85    3.58   1 
   1   3 -21  153.33    7.45   1 
   1   3 -20    4.30    1.69   1 
   1   3 -19   15.98    2.61   1 
   1   3 -18   28.24    3.02   1 
   1   3 -17    2.46    1.28   1 
   1   3 -16   57.32    3.85   1 
   1   3 -15   14.73    2.12   1 
   1   3 -14   92.05    4.40   1 
   1   3 -13  136.13    5.08   1 
   1   3 -12   53.50    3.04   1 
   1   3 -11  304.86    6.84   1 
   1   3 -10   62.03    2.88   1 
   1   3  -9  182.16    4.59   1 
   1   3  -8  181.05    4.28   1 
   1   3  -7    0.94    0.45   1 
   1   3  -6   55.77    1.99   1 
   1   3  -5    5.84    0.67   1 
   1   3  -4    9.69    0.72   1 
   1   3  -3  161.29    2.80   1 
   1   3  -2    3.05    0.46   1 
  -1  -3   1  641.23    7.21   1 
  -1  -3   0  701.56    7.92   1 
  -1  -3  -1    7.06    0.87   1 
  -1  -3  -2  472.84    7.10   1 
  -1  -3  -3   32.33    2.00   1 
  -1  -3  -4  988.29   12.46   1 
  -1  -3  -5   19.99    1.86   1 
  -1  -3  -6  145.14    4.99   1 
  -1  -3  -7  266.85    7.09   1 
  -1  -3  -8    7.31    1.54   1 
  -1  -3  -9  166.16    6.05   1 
  -1  -3 -10    1.24    0.98   1 
  -1  -3 -11  114.31    5.45   1 
  -1  -3 -12    1.88    1.13   1 
  -1  -3 -13    2.12    1.29   1 
  -1  -3 -14   58.14    4.32   1 
  -1  -3 -15   25.77    3.18   1 
  -1  -3 -16   -0.53    1.14   1 
  -1  -3 -17   65.55    5.05   1 
  -1  -3 -18    4.51    1.95   1 
  -1  -3 -19   31.17    4.02   1 
  -1  -3 -20   -0.18    1.54   1 
  -1  -3 -21   13.00    3.16   1 
  -1  -3 -22   26.02    4.16   1 
  -1  -3 -23   -1.14    1.86   1 
  -1  -3 -24   15.33    3.71   1 
  -1  -3 -25    4.20    2.68   1 
   1   4 -29   38.47    5.28   1 
   1   4 -28    1.68    2.25   1 
   1   4 -27   37.54    4.64   1 
   1   4 -26   11.06    3.13   1 
   1   4 -25   40.66    4.50   1 
   1   4 -24   -0.23    1.49   1 
   1   4 -23   26.50    3.66   1 
   1   4 -22    0.88    1.43   1 
   1   4 -21   75.76    5.17   1 
   1   4 -20   11.76    2.34   1 
   1   4 -19  156.70    6.80   1 
   1   4 -18   83.11    4.80   1 
   1   4 -17   34.16    3.04   1 
   1   4 -16    2.22    1.09   1 
   1   4 -15   26.66    2.48   1 
   1   4 -14   21.78    2.16   1 
   1   4 -13   46.20    2.85   1 
   1   4 -12    3.05    0.92   1 
   1   4 -11   86.66    3.39   1 
   1   4 -10   11.37    1.26   1 
   1   4  -9   90.09    3.07   1 
   1   4  -8   27.64    1.60   1 
   1   4  -7   18.16    1.19   1 
   1   4  -6    4.04    0.61   1 
   1   4  -5   17.37    0.99   1 
   1   4  -4    5.29    0.58   1 
   1   4  -3  384.22    4.92   1 
   1   4  -2  514.86    5.95   1 
  -1  -4   1  169.83    3.43   1 
  -1  -4   0  109.41    2.96   1 
  -1  -4  -1   13.56    1.28   1 
  -1  -4  -2    9.26    1.21   1 
  -1  -4  -3 1112.97   13.18   1 
  -1  -4  -4   20.71    1.89   1 
  -1  -4  -5  380.25    8.07   1 
  -1  -4  -6    0.86    0.85   1 
  -1  -4  -7   -0.15    0.69   1 
  -1  -4  -8  359.34    9.03   1 
  -1  -4  -9   28.11    2.66   1 
  -1  -4 -10  195.48    7.14   1 
  -1  -4 -11   -0.29    0.83   1 
  -1  -4 -12   39.97    3.54   1 
  -1  -4 -13    6.70    1.80   1 
  -1  -4 -14    0.75    1.16   1 
  -1  -4 -15   22.12    3.22   1 
  -1  -4 -16   33.10    3.68   1 
  -1  -4 -17   35.86    3.96   1 
  -1  -4 -18    1.05    1.56   1 
  -1  -4 -19   25.59    3.79   1 
  -1  -4 -20    3.35    2.08   1 
  -1  -4 -21    1.05    1.84   1 
  -1  -4 -22    1.36    2.07   1 
  -1  -4 -23    0.62    2.05   1 
  -1  -4 -24   10.00    3.35   1 
  -1  -4 -25   41.08    5.75   1 
   1   5 -30   -1.63    2.26   1 
   1   5 -29    4.95    2.69   1 
   1   5 -28   -0.31    1.95   1 
   1   5 -27   32.08    4.52   1 
   1   5 -26   12.95    3.06   1 
   1   5 -25   13.84    2.97   1 
   1   5 -24   68.87    5.32   1 
   1   5 -23    2.03    1.51   1 
   1   5 -22    1.86    1.52   1 
   1   5 -21   15.59    2.67   1 
   1   5 -20    3.16    1.45   1 
   1   5 -19   22.85    2.69   1 
   1   5 -18    0.71    1.03   1 
   1   5 -17   10.27    1.80   1 
   1   5 -16   26.64    2.45   1 
   1   5 -15  178.28    5.85   1 
   1   5 -14  124.25    4.64   1 
   1   5 -13  228.79    6.10   1 
   1   5 -12   60.56    2.92   1 
   1   5 -11   59.49    2.75   1 
   1   5 -10   37.80    2.04   1 
   1   5  -9    1.80    0.57   1 
   1   5  -8  156.72    3.57   1 
   1   5  -7  148.45    3.17   1 
   1   5  -6   91.18    2.31   1 
   1   5  -5  212.45    3.47   1 
   1   5  -4  324.68    4.46   1 
   1   5  -3    7.61    0.69   1 
  -1  -5   2   31.05    1.49   1 
  -1  -5   1  243.55    4.48   1 
  -1  -5   0  149.14    3.76   1 
  -1  -5  -1   87.23    3.07   1 
  -1  -5  -2  361.83    6.87   1 
  -1  -5  -3    5.79    1.15   1 
  -1  -5  -4  316.30    7.33   1 
  -1  -5  -5   28.58    2.40   1 
  -1  -5  -6   18.26    2.05   1 
  -1  -5  -7   18.11    2.16   1 
  -1  -5  -8    9.29    1.79   1 
  -1  -5  -9   65.01    4.16   1 
  -1  -5 -10    0.11    0.95   1 
  -1  -5 -11   19.23    2.63   1 
  -1  -5 -12   22.73    2.96   1 
  -1  -5 -13   21.36    2.91   1 
  -1  -5 -14   41.62    3.89   1 
  -1  -5 -15    2.21    1.44   1 
  -1  -5 -16   34.14    3.78   1 
  -1  -5 -17    8.42    2.35   1 
  -1  -5 -18    6.02    2.28   1 
  -1  -5 -19    7.45    2.54   1 
  -1  -5 -20   -0.77    1.66   1 
  -1  -5 -21    1.66    1.95   1 
  -1  -5 -22    1.01    2.07   1 
  -1  -5 -23    3.47    2.49   1 
  -1  -5 -24    6.46    2.82   1 
   1   6 -29   28.34    4.47   1 
   1   6 -28    0.79    2.22   1 
   1   6 -27   42.82    4.73   1 
   1   6 -26   17.11    3.24   1 
   1   6 -25   27.14    3.82   1 
   1   6 -24   44.10    4.25   1 
   1   6 -23   56.47    4.60   1 
   1   6 -22   15.00    2.66   1 
   1   6 -21  105.17    5.68   1 
   1   6 -20    0.58    1.06   1 
   1   6 -19   67.19    4.21   1 
   1   6 -18    4.42    1.41   1 
   1   6 -17   93.40    4.56   1 
   1   6 -16  108.05    4.65   1 
   1   6 -15  186.12    5.82   1 
   1   6 -14  252.30    6.49   1 
   1   6 -13  449.68    8.30   1 
   1   6 -12   63.50    2.85   1 
   1   6 -11  249.05    5.37   1 
   1   6 -10   18.44    1.39   1 
   1   6  -9    0.96    0.48   1 
   1   6  -8    7.44    0.83   1 
   1   6  -7   33.60    1.44   1 
   1   6  -6    0.28    0.32   1 
   1   6  -5   18.97    1.03   1 
   1   6  -4    8.12    0.75   1 
  -1  -6   3   16.12    1.14   1 
  -1  -6   2  255.56    4.57   1 
  -1  -6   1   14.64    1.25   1 
  -1  -6   0   52.49    2.38   1 
  -1  -6  -1  109.76    3.65   1 
  -1  -6  -2  145.44    4.54   1 
  -1  -6  -3    0.02    0.59   1 
  -1  -6  -4    0.69    0.70   1 
  -1  -6  -5   52.96    3.24   1 
  -1  -6  -6   16.93    2.22   1 
  -1  -6  -7   41.73    3.22   1 
  -1  -6  -8  276.11    8.22   1 
  -1  -6  -9    1.05    1.20   1 
  -1  -6 -10  198.07    7.49   1 
  -1  -6 -11   47.15    3.90   1 
  -1  -6 -12   49.70    4.00   1 
  -1  -6 -13   13.32    2.44   1 
  -1  -6 -14   16.22    2.79   1 
  -1  -6 -15  123.11    6.85   1 
  -1  -6 -16    0.17    1.38   1 
  -1  -6 -17   38.37    4.28   1 
  -1  -6 -18    7.19    2.48   1 
  -1  -6 -19    2.69    1.98   1 
  -1  -6 -20    1.58    1.91   1 
  -1  -6 -21    1.98    2.13   1 
  -1  -6 -22    1.81    2.29   1 
  -1  -6 -23    2.83    2.51   1 
   1   7 -28    0.01    1.97   1 
   1   7 -27   18.17    3.34   1 
   1   7 -26   25.23    3.71   1 
   1   7 -25    5.19    2.21   1 
   1   7 -24    5.00    1.97   1 
   1   7 -23    3.56    1.64   1 
   1   7 -22   13.21    2.40   1 
   1   7 -21   44.62    3.70   1 
   1   7 -20   13.83    2.33   1 
   1   7 -19   36.94    3.14   1 
   1   7 -18    8.88    1.70   1 
   1   7 -17    2.38    1.07   1 
   1   7 -16   15.05    1.84   1 
   1   7 -15   37.02    2.55   1 
   1   7 -14   48.84    2.74   1 
   1   7 -13    3.17    0.89   1 
   1   7 -12    2.66    0.81   1 
   1   7 -11   12.92    1.23   1 
   1   7 -10  235.72    4.65   1 
   1   7  -9    0.78    0.48   1 
   1   7  -8  829.01    8.65   1 
   1   7  -7  130.20    2.74   1 
   1   7  -6  513.46    6.09   1 
   1   7  -5   42.13    1.54   1 
  -1  -7   4  581.00    7.00   1 
  -1  -7   3   19.88    1.30   1 
  -1  -7   2    3.26    0.73   1 
  -1  -7   1   18.22    1.48   1 
  -1  -7   0  970.13   11.66   1 
  -1  -7  -1    2.93    0.93   1 
  -1  -7  -2  873.59   12.29   1 
  -1  -7  -3    0.04    0.68   1 
  -1  -7  -4   59.44    3.43   1 
  -1  -7  -5   10.89    1.76   1 
  -1  -7  -6   -0.05    0.81   1 
  -1  -7  -7   32.04    2.83   1 
  -1  -7  -8    5.69    1.57   1 
  -1  -7  -9    7.83    1.84   1 
  -1  -7 -10   98.00    5.42   1 
  -1  -7 -11   -0.21    1.03   1 
  -1  -7 -12    0.46    1.23   1 
  -1  -7 -13   61.97    4.80   1 
  -1  -7 -14   11.97    2.62   1 
  -1  -7 -15   -0.27    1.38   1 
  -1  -7 -16    0.93    1.48   1 
  -1  -7 -17    1.95    1.78   1 
  -1  -7 -18    1.24    1.80   1 
  -1  -7 -19    1.34    1.87   1 
  -1  -7 -20   -0.54    1.84   1 
  -1  -7 -21   19.00    3.93   1 
  -1  -7 -22    5.90    2.80   1 
   1   8 -26   12.02    2.76   1 
   1   8 -25    0.81    1.55   1 
   1   8 -24   18.30    2.82   1 
   1   8 -23   20.43    2.84   1 
   1   8 -22    2.49    1.45   1 
   1   8 -21   46.08    3.60   1 
   1   8 -20   19.99    2.39   1 
   1   8 -19    2.52    1.11   1 
   1   8 -18  166.63    5.89   1 
   1   8 -17    7.18    1.48   1 
   1   8 -16  148.80    5.07   1 
   1   8 -15   39.58    2.52   1 
   1   8 -14   46.53    2.54   1 
   1   8 -13  272.56    5.87   1 
   1   8 -12  101.91    3.30   1 
   1   8 -11   17.59    1.35   1 
   1   8 -10   61.03    2.20   1 
   1   8  -9   91.11    2.48   1 
   1   8  -8  451.38    5.74   1 
   1   8  -7   40.14    1.55   1 
   1   8  -6  257.97    4.01   1 
  -1  -8   5   98.93    2.61   1 
  -1  -8   4   23.70    1.41   1 
  -1  -8   3    0.33    0.46   1 
  -1  -8   2   61.17    2.50   1 
  -1  -8   1   41.37    2.24   1 
  -1  -8   0    1.51    0.80   1 
  -1  -8  -1    4.16    1.08   1 
  -1  -8  -2    0.72    0.78   1 
  -1  -8  -3  374.32    8.49   1 
  -1  -8  -4    0.48    0.86   1 
  -1  -8  -5  473.41   10.31   1 
  -1  -8  -6   24.12    2.59   1 
  -1  -8  -7   56.11    3.87   1 
  -1  -8  -8   53.53    3.89   1 
  -1  -8  -9   -0.50    0.90   1 
  -1  -8 -10    0.20    1.09   1 
  -1  -8 -11   -0.97    1.00   1 
  -1  -8 -12    2.90    1.54   1 
  -1  -8 -13  113.36    6.57   1 
  -1  -8 -14   39.38    4.06   1 
  -1  -8 -15  141.02    7.70   1 
  -1  -8 -16   31.14    4.23   1 
  -1  -8 -17   21.84    3.73   1 
  -1  -8 -18   -0.34    1.85   1 
  -1  -8 -19   12.90    3.29   1 
  -1  -8 -20    2.18    2.21   1 
  -1  -8 -21   10.14    3.29   1 
  -1  -8 -22    4.35    2.61   1 
   1   9 -24    8.10    2.13   1 
   1   9 -23   15.33    2.59   1 
   1   9 -22    6.31    1.78   1 
   1   9 -21    6.32    1.72   1 
   1   9 -20    4.08    1.41   1 
   1   9 -19    1.07    1.02   1 
   1   9 -18    0.59    0.86   1 
   1   9 -17    3.20    1.15   1 
   1   9 -16    0.62    0.69   1 
   1   9 -15   -0.19    0.61   1 
   1   9 -14    7.74    1.22   1 
   1   9 -13    0.13    0.54   1 
   1   9 -12   85.28    2.87   1 
   1   9 -11    0.34    0.48   1 
   1   9 -10  621.71    7.34   1 
   1   9  -9   29.02    1.40   1 
   1   9  -8  379.58    5.08   1 
   1   9  -7    1.54    0.48   1 
  -1  -9   6  117.33    2.85   1 
  -1  -9   5  410.45    5.91   1 
  -1  -9   4  207.87    4.30   1 
  -1  -9   3  160.43    4.00   1 
  -1  -9   2  247.80    5.34   1 
  -1  -9   1  100.47    3.67   1 
  -1  -9   0  583.27    9.69   1 
  -1  -9  -1  508.92    9.43   1 
  -1  -9  -2   42.39    2.88   1 
  -1  -9  -3  186.46    6.10   1 
  -1  -9  -4   13.34    2.01   1 
  -1  -9  -5   75.64    4.29   1 
  -1  -9  -6   27.32    2.71   1 
  -1  -9  -7   85.18    4.89   1 
  -1  -9  -8   57.79    4.14   1 
  -1  -9  -9   34.15    3.33   1 
  -1  -9 -10    8.40    2.01   1 
  -1  -9 -11    0.70    1.25   1 
  -1  -9 -12   14.73    2.79   1 
  -1  -9 -13    1.34    1.57   1 
  -1  -9 -14   15.16    2.91   1 
  -1  -9 -15   18.08    3.31   1 
  -1  -9 -16   51.84    5.02   1 
  -1  -9 -17    0.15    1.81   1 
  -1  -9 -18    8.54    2.84   1 
  -1  -9 -19    1.57    2.12   1 
  -1  -9 -20    0.42    2.14   1 
  -1  -9 -21    2.58    2.42   1 
   1  10 -22    0.49    1.13   1 
   1  10 -21    4.92    1.53   1 
   1  10 -20   27.78    2.61   1 
   1  10 -19    0.10    0.89   1 
   1  10 -18   71.83    3.70   1 
   1  10 -17    3.57    1.09   1 
   1  10 -16   33.46    2.29   1 
   1  10 -15   37.20    2.29   1 
   1  10 -14   17.35    1.54   1 
   1  10 -13    0.50    0.59   1 
   1  10 -12   17.73    1.31   1 
   1  10 -11   48.76    1.90   1 
   1  10 -10  139.31    3.00   1 
   1  10  -9   36.78    1.51   1 
   1  10  -8  278.86    4.17   1 
  -1 -10   7  175.27    3.48   1 
  -1 -10   6  126.15    3.10   1 
  -1 -10   5   24.57    1.53   1 
  -1 -10   4    1.56    0.64   1 
  -1 -10   3  297.00    5.82   1 
  -1 -10   2    0.46    0.62   1 
  -1 -10   1   57.42    2.97   1 
  -1 -10   0    0.81    0.79   1 
  -1 -10  -1   90.50    4.09   1 
  -1 -10  -2    1.02    0.88   1 
  -1 -10  -3  464.07   10.07   1 
  -1 -10  -4    8.16    1.67   1 
  -1 -10  -5  257.99    7.98   1 
  -1 -10  -6    3.28    1.43   1 
  -1 -10  -7   14.36    2.31   1 
  -1 -10  -8    1.88    1.20   1 
  -1 -10  -9   10.06    2.11   1 
  -1 -10 -10   85.46    5.40   1 
  -1 -10 -11  149.70    7.36   1 
  -1 -10 -12    1.53    1.48   1 
  -1 -10 -13  114.08    6.81   1 
  -1 -10 -14    6.53    2.32   1 
  -1 -10 -15   37.57    4.38   1 
  -1 -10 -16    2.18    1.87   1 
  -1 -10 -17   17.78    3.63   1 
  -1 -10 -18   -0.18    1.84   1 
  -1 -10 -19   72.10    6.54   1 
  -1 -10 -20   27.94    4.77   1 
   1  11 -20   54.16    3.42   1 
   1  11 -19   45.95    3.00   1 
   1  11 -18    8.32    1.48   1 
   1  11 -17   68.29    3.25   1 
   1  11 -16    1.02    0.77   1 
   1  11 -15   50.20    2.50   1 
   1  11 -14    2.98    0.79   1 
   1  11 -13    0.61    0.58   1 
   1  11 -12  136.83    3.15   1 
   1  11 -11    0.60    0.52   1 
   1  11 -10  130.95    2.79   1 
  -1 -11   7    0.64    0.53   1 
  -1 -11   6  105.19    2.96   1 
  -1 -11   5   97.95    3.03   1 
  -1 -11   4   39.03    2.14   1 
  -1 -11   3  108.15    3.71   1 
  -1 -11   2  219.88    5.62   1 
  -1 -11   1   65.44    3.28   1 
  -1 -11   0   -0.14    0.73   1 
  -1 -11  -1   47.02    3.08   1 
  -1 -11  -2   22.26    2.30   1 
  -1 -11  -3  129.80    5.47   1 
  -1 -11  -4    1.22    1.08   1 
  -1 -11  -5   68.26    4.37   1 
  -1 -11  -6   30.83    3.05   1 
  -1 -11  -7   15.78    2.51   1 
  -1 -11  -8   14.68    2.53   1 
  -1 -11  -9   16.10    2.62   1 
  -1 -11 -10    1.69    1.34   1 
  -1 -11 -11   11.77    2.64   1 
  -1 -11 -12    0.34    1.41   1 
  -1 -11 -13   22.03    3.46   1 
  -1 -11 -14   73.22    5.83   1 
  -1 -11 -15    2.77    1.98   1 
  -1 -11 -16   37.13    4.94   1 
  -1 -11 -17    1.04    2.02   1 
  -1 -11 -18    1.39    2.04   1 
  -1 -11 -19    0.23    2.14   1 
   1  12 -16   38.94    2.24   1 
   1  12 -15   12.06    1.32   1 
   1  12 -14   39.72    1.91   1 
   1  12 -13   70.77    2.27   1 
   1  12 -12    2.48    0.63   1 
   1  12 -11   18.48    1.13   1 
  -1 -12  10    0.36    0.54   1 
  -1 -12   9    3.55    0.71   1 
  -1 -12   6  159.61    3.83   1 
  -1 -12   5   91.08    3.15   1 
  -1 -12   4   15.24    1.59   1 
  -1 -12   3  178.08    5.06   1 
  -1 -12   2   66.48    3.27   1 
  -1 -12   1    8.77    1.50   1 
  -1 -12   0   19.36    2.05   1 
  -1 -12  -1   86.86    4.26   1 
  -1 -12  -2   80.21    4.26   1 
  -1 -12  -3   97.74    4.85   1 
  -1 -12  -4   64.17    4.20   1 
  -1 -12  -5    0.78    1.06   1 
  -1 -12  -6    1.41    1.25   1 
  -1 -12  -7    0.80    1.18   1 
  -1 -12  -8   37.11    3.62   1 
  -1 -12  -9   61.86    4.70   1 
  -1 -12 -10   43.74    4.18   1 
  -1 -12 -11   28.61    3.49   1 
  -1 -12 -12    0.74    1.60   1 
  -1 -12 -13    0.00    1.56   1 
  -1 -12 -14    0.45    1.56   1 
  -1 -12 -15    2.77    2.11   1 
  -1 -12 -16    7.60    2.75   1 
  -1 -12 -17   29.50    4.67   1 
  -1 -12 -18   15.95    3.78   1 
  -1 -13  11   65.64    1.96   1 
  -1 -13  10   91.20    2.30   1 
  -1 -13   9   44.71    1.76   1 
  -1 -13   8   77.75    2.41   1 
  -1 -13   7    0.75    0.68   1 
  -1 -13   6  159.90    4.10   1 
  -1 -13   5   16.59    1.66   1 
  -1 -13   4   40.72    2.44   1 
  -1 -13   3    1.73    0.86   1 
  -1 -13   2    0.70    0.83   1 
  -1 -13   1    8.76    1.59   1 
  -1 -13   0   27.29    2.47   1 
  -1 -13  -1    1.21    1.01   1 
  -1 -13  -2    1.86    1.12   1 
  -1 -13  -3    3.44    1.40   1 
  -1 -13  -4   72.56    4.47   1 
  -1 -13  -5    5.76    1.73   1 
  -1 -13  -6   -0.35    1.07   1 
  -1 -13  -7    0.16    1.17   1 
  -1 -13  -8   47.81    4.19   1 
  -1 -13  -9    1.82    1.57   1 
  -1 -13 -10   29.05    3.48   1 
  -1 -13 -11    3.60    1.86   1 
  -1 -13 -12    0.94    1.56   1 
  -1 -13 -13    1.46    1.86   1 
  -1 -13 -14    7.70    2.66   1 
  -1 -13 -15    5.15    2.39   1 
  -1 -13 -16    0.41    2.07   1 
  -1 -13 -17    3.06    2.37   1 
  -1 -13 -18    3.90    2.71   1 
  -1 -14  10  104.60    2.42   1 
  -1 -14   9   85.58    2.44   1 
  -1 -14   8  163.55    3.73   1 
  -1 -14   7   33.86    1.96   1 
  -1 -14   6  254.69    5.45   1 
  -1 -14   5   12.25    1.51   1 
  -1 -14   4   39.07    2.47   1 
  -1 -14   3    5.66    1.31   1 
  -1 -14   2   11.20    1.74   1 
  -1 -14   1  125.63    4.94   1 
  -1 -14   0   57.76    3.56   1 
  -1 -14  -1   58.64    3.80   1 
  -1 -14  -2  206.68    7.12   1 
  -1 -14  -3    0.48    1.13   1 
  -1 -14  -4  111.72    5.68   1 
  -1 -14  -5    1.31    1.21   1 
  -1 -14  -6    0.31    1.21   1 
  -1 -14  -7   92.42    5.65   1 
  -1 -14  -8   11.65    2.53   1 
  -1 -14  -9   70.57    5.26   1 
  -1 -14 -10    4.20    1.98   1 
  -1 -14 -11    0.29    1.57   1 
  -1 -14 -12    7.54    2.56   1 
  -1 -14 -13    0.10    1.69   1 
  -1 -14 -14   -1.57    1.83   1 
  -1 -14 -15    0.91    2.06   1 
  -1 -14 -16    0.80    2.20   1 
  -1 -14 -17    5.09    2.79   1 
  -1 -15   9    7.70    1.01   1 
  -1 -15   8  181.31    4.07   1 
  -1 -15   7    0.03    0.67   1 
  -1 -15   6   98.84    3.54   1 
  -1 -15   5   17.20    1.78   1 
  -1 -15   4   77.67    3.54   1 
  -1 -15   3   16.40    1.91   1 
  -1 -15   2    4.95    1.37   1 
  -1 -15   1    3.63    1.32   1 
  -1 -15   0   -0.20    0.92   1 
  -1 -15  -1   -0.10    0.93   1 
  -1 -15  -2   59.61    4.01   1 
  -1 -15  -3    9.87    2.12   1 
  -1 -15  -4    7.95    1.99   1 
  -1 -15  -5   69.34    4.71   1 
  -1 -15  -6    4.29    1.79   1 
  -1 -15  -7   26.42    3.49   1 
  -1 -15  -8    0.08    1.38   1 
  -1 -15  -9   -0.21    1.41   1 
  -1 -15 -10    2.08    1.74   1 
  -1 -15 -11    0.25    1.79   1 
  -1 -15 -12   -0.08    1.74   1 
  -1 -15 -13   75.40    6.37   1 
  -1 -15 -14    1.61    2.21   1 
  -1 -15 -15   53.68    5.73   1 
  -1 -15 -16    7.79    3.06   1 
  -1 -16   7   19.96    1.69   1 
  -1 -16   6    7.61    1.27   1 
  -1 -16   5   64.80    3.18   1 
  -1 -16   4    0.68    0.88   1 
  -1 -16   3  107.81    4.50   1 
  -1 -16   2   28.05    2.53   1 
  -1 -16   1   99.58    4.68   1 
  -1 -16   0  167.67    6.28   1 
  -1 -16  -1    1.72    1.24   1 
  -1 -16  -2   35.92    3.28   1 
  -1 -16  -3    4.87    1.66   1 
  -1 -16  -4    1.64    1.33   1 
  -1 -16  -5  110.25    6.11   1 
  -1 -16  -6   21.01    3.16   1 
  -1 -16  -7  115.95    6.60   1 
  -1 -16  -8   43.53    4.35   1 
  -1 -16  -9   36.49    4.22   1 
  -1 -16 -10   45.88    4.69   1 
  -1 -16 -11   14.51    3.23   1 
  -1 -16 -12    2.93    2.24   1 
  -1 -16 -13    3.06    2.39   1 
  -1 -16 -14   -0.59    2.21   1 
  -1 -17   5    1.70    0.94   1 
  -1 -17   4   -0.45    0.81   1 
  -1 -17   3    0.56    0.97   1 
  -1 -17   2   -0.09    0.93   1 
  -1 -17   1   15.81    2.26   1 
  -1 -17   0   55.27    3.76   1 
  -1 -17  -1    4.50    1.50   1 
  -1 -17  -2   42.53    3.58   1 
  -1 -17  -3   35.37    3.48   1 
  -1 -17  -4    0.63    1.42   1 
  -1 -17  -5    0.66    1.44   1 
  -1 -17  -6    0.69    1.50   1 
  -1 -17  -7    2.24    1.74   1 
  -1 -17  -8   33.88    3.98   1 
  -1 -17  -9   -0.48    1.70   1 
  -1 -17 -10    4.14    2.30   1 
  -1 -17 -11    7.95    2.76   1 
  -1 -17 -12   -0.17    1.99   1 
  -1 -17 -13   43.04    5.16   1 
  -1 -18   3   60.86    3.54   1 
  -1 -18   2    0.28    0.99   1 
  -1 -18   1   15.94    2.32   1 
  -1 -18   0   -0.64    1.06   1 
  -1 -18  -1    2.41    1.47   1 
  -1 -18  -2    0.07    1.27   1 
  -1 -18  -3   90.73    5.45   1 
  -1 -18  -4    0.83    1.50   1 
  -1 -18  -5  100.03    6.14   1 
  -1 -18  -6    4.81    2.07   1 
  -1 -18  -7   69.89    5.49   1 
  -1 -18  -8    2.96    1.99   1 
  -1 -18  -9   18.91    3.52   1 
  -1 -18 -10    1.21    2.06   1 
  -1 -18 -11   19.15    3.91   1 
  -1 -18 -12    6.58    2.83   1 
  -1 -19   0    2.59    1.47   1 
  -1 -19  -1    1.38    1.42   1 
  -1 -19  -2    5.31    1.94   1 
  -1 -19  -3    0.03    1.44   1 
  -1 -19  -4    0.96    1.64   1 
  -1 -19  -5    2.71    1.90   1 
  -1 -19  -6   18.92    3.48   1 
  -1 -19  -7    1.55    2.05   1 
  -1 -19  -8   10.18    2.88   1 
  -1 -19  -9   -0.34    1.88   1 
  -1 -19 -10    3.08    2.28   1 
  -1 -19 -11    4.53    2.55   1 
  -1 -20  -3   19.00    3.11   1 
  -1 -20  -4    2.66    1.81   1 
  -1 -20  -5    5.85    2.30   1 
  -1 -20  -6    4.71    2.25   1 
  -1 -20  -7   -0.20    2.04   1 
  -1 -20  -8    2.82    2.35   1 
  -1 -20  -9    7.06    2.82   1 
   2 -20 -10    0.13    2.26   1 
   2 -20  -9   13.87    3.23   1 
   2 -19 -12   10.48    3.37   1 
   2 -19 -11    0.00    2.02   1 
   2 -19 -10   11.78    3.22   1 
   2 -19  -9    4.67    2.34   1 
   2 -19  -8    5.23    2.41   1 
   2 -19  -7    6.41    2.41   1 
   2 -19  -6   27.57    3.77   1 
   2 -19  -5    5.60    2.14   1 
   2 -19  -4   25.61    3.34   1 
   2 -18 -13   22.47    4.35   1 
   2 -18 -12    1.47    2.19   1 
   2 -18 -11    1.25    1.94   1 
   2 -18 -10    2.02    1.95   1 
   2 -18  -9    7.95    2.53   1 
   2 -18  -8    3.19    1.94   1 
   2 -18  -7    5.58    2.17   1 
   2 -18  -6   29.17    3.70   1 
   2 -18  -5   -0.53    1.26   1 
   2 -18  -4    8.08    2.09   1 
   2 -18  -3    5.37    1.74   1 
   2 -18  -2   -0.36    1.12   1 
   2 -18  -1   10.67    2.01   1 
   2 -17 -14   -0.42    2.17   1 
   2 -17 -13    2.43    2.31   1 
   2 -17 -12    2.96    2.30   1 
   2 -17 -11   -0.38    1.83   1 
   2 -17 -10   -0.81    1.56   1 
   2 -17  -9   21.40    3.51   1 
   2 -17  -8    2.82    1.90   1 
   2 -17  -7   46.34    4.31   1 
   2 -17  -6    0.65    1.35   1 
   2 -17  -5    4.51    1.82   1 
   2 -17  -4    8.11    2.07   1 
   2 -17  -3    2.02    1.31   1 
   2 -17  -2   38.52    3.21   1 
   2 -17  -1    2.55    1.30   1 
   2 -17   0    5.50    1.53   1 
   2 -17   1    6.53    1.49   1 
   2 -16 -16   29.23    5.02   1 
   2 -16 -15   30.70    4.79   1 
   2 -16 -14   12.92    3.43   1 
   2 -16 -13   13.81    3.42   1 
   2 -16 -12    0.15    1.90   1 
   2 -16 -11   -0.52    1.61   1 
   2 -16 -10   24.07    3.63   1 
   2 -16  -9    3.62    1.88   1 
   2 -16  -8   90.47    5.92   1 
   2 -16  -7   18.46    2.97   1 
   2 -16  -6   51.16    4.23   1 
   2 -16  -5    6.87    1.99   1 
   2 -16  -4    0.74    1.24   1 
   2 -16  -3    3.51    1.45   1 
   2 -16  -2    0.95    1.08   1 
   2 -16  -1   12.19    1.92   1 
   2 -16   0    0.99    0.93   1 
   2 -16   1   34.84    2.58   1 
   2 -16   2    0.28    0.85   1 
   2 -16   3   29.71    2.14   1 
   2 -15 -17   -0.73    2.21   1 
   2 -15 -16    2.04    2.38   1 
   2 -15 -15    3.55    2.33   1 
   2 -15 -14    6.84    2.59   1 
   2 -15 -13   22.70    3.94   1 
   2 -15 -12    6.98    2.44   1 
   2 -15 -11   -0.45    1.59   1 
   2 -15 -10    1.49    1.70   1 
   2 -15  -9    0.83    1.41   1 
   2 -15  -8    0.96    1.41   1 
   2 -15  -7    9.20    2.16   1 
   2 -15  -6    4.84    1.70   1 
   2 -15  -5   30.72    3.18   1 
   2 -15  -4   51.79    3.85   1 
   2 -15  -3    7.75    1.76   1 
   2 -15  -2  239.56    7.34   1 
   2 -15  -1    0.56    0.89   1 
   2 -15   0   93.10    4.20   1 
   2 -15   1    0.67    0.82   1 
   2 -15   2   27.72    2.13   1 
   2 -15   3   63.77    2.85   1 
   2 -15   4    0.43    0.66   1 
   2 -15   5   43.91    1.97   1 
   2 -14 -18   40.13    5.75   1 
   2 -14 -17    0.52    2.19   1 
   2 -14 -16    1.39    2.11   1 
   2 -14 -15    5.40    2.45   1 
   2 -14 -14    2.03    2.02   1 
   2 -14 -13    0.57    1.74   1 
   2 -14 -12   81.50    6.20   1 
   2 -14 -11    5.97    2.17   1 
   2 -14 -10  211.85    9.24   1 
   2 -14  -9    1.18    1.44   1 
   2 -14  -8  190.31    8.14   1 
   2 -14  -7    4.85    1.78   1 
   2 -14  -6   15.49    2.51   1 
   2 -14  -5   15.20    2.38   1 
   2 -14  -4   39.61    3.29   1 
   2 -14  -3    9.96    1.90   1 
   2 -14  -2   33.70    2.78   1 
   2 -14  -1   14.73    1.96   1 
   2 -14   0   32.08    2.45   1 
   2 -14   1    0.34    0.75   1 
   2 -14   2   -0.26    0.63   1 
   2 -14   3    0.54    0.65   1 
   2 -14   4   14.63    1.35   1 
   2 -14   5    7.68    0.96   1 
   2 -13 -19    7.03    3.09   1 
   2 -13 -18   17.02    3.91   1 
   2 -13 -17    2.99    2.37   1 
   2 -13 -16    5.70    2.49   1 
   2 -13 -15    7.81    2.74   1 
   2 -13 -14    0.23    1.80   1 
   2 -13 -13    1.41    1.74   1 
   2 -13 -12    1.95    1.74   1 
   2 -13 -11    0.08    1.42   1 
   2 -13 -10   27.28    3.68   1 
   2 -13  -9    0.19    1.27   1 
   2 -13  -8    4.45    1.72   1 
   2 -13  -7   30.91    3.25   1 
   2 -13  -6    4.46    1.52   1 
   2 -13  -5   46.08    3.62   1 
   2 -13  -4  130.96    5.61   1 
   2 -13  -3    0.69    0.95   1 
   2 -13  -2   72.83    3.84   1 
   2 -13  -1   16.88    1.92   1 
   2 -13   0   12.38    1.64   1 
   2 -13   1  275.54    6.32   1 
   2 -13   2   35.88    2.16   1 
   2 -13   3  448.47    7.12   1 
   2 -13   4   10.77    1.12   1 
   2 -13   5   96.19    2.49   1 
   2 -12 -20    7.04    3.24   1 
   2 -12 -19    1.35    2.34   1 
   2 -12 -18    0.94    2.13   1 
   2 -12 -17    0.11    1.92   1 
   2 -12 -16   -0.38    1.79   1 
   2 -12 -15    3.40    2.14   1 
   2 -12 -14   10.48    2.78   1 
   2 -12 -13   38.05    4.34   1 
   2 -12 -12   42.12    4.38   1 
   2 -12 -11   62.62    5.09   1 
   2 -12 -10   44.19    4.20   1 
   2 -12  -9  115.22    6.32   1 
   2 -12  -8   33.12    3.43   1 
   2 -12  -7   40.06    3.57   1 
   2 -12  -6   21.10    2.57   1 
   2 -12  -5  150.02    6.13   1 
   2 -12  -4   15.28    2.15   1 
   2 -12  -3  196.95    6.38   1 
   2 -12  -2   33.34    2.59   1 
   2 -12  -1   47.21    2.84   1 
   2 -12   0   51.65    2.81   1 
   2 -12   1   20.77    1.73   1 
   2 -12   2    2.23    0.76   1 
   2 -12   3   80.74    2.80   1 
   2 -12   4    0.85    0.56   1 
   2 -12   5    0.20    0.44   1 
   2 -11 -21   14.58    3.97   1 
   2 -11 -20   35.22    5.27   1 
   2 -11 -19    4.90    2.69   1 
   2 -11 -18   23.79    4.30   1 
   2 -11 -17    0.31    1.73   1 
   2 -11 -16    0.60    1.75   1 
   2 -11 -15   36.34    4.70   1 
   2 -11 -14   -0.48    1.53   1 
   2 -11 -13   60.16    5.22   1 
   2 -11 -12   60.67    5.08   1 
   2 -11 -11    0.85    1.28   1 
   2 -11 -10   20.53    3.09   1 
   2 -11  -9   18.10    2.79   1 
   2 -11  -8    5.63    1.68   1 
   2 -11  -7    2.10    1.22   1 
   2 -11  -6    0.44    0.92   1 
   2 -11  -5    3.69    1.29   1 
   2 -11  -4    0.49    0.78   1 
   2 -11  -3   40.52    2.85   1 
   2 -11  -2   25.61    2.21   1 
   2 -11  -1   76.25    3.42   1 
   2 -11   0   46.63    2.55   1 
   2 -11   1  599.51    8.90   1 
   2 -11   2    1.52    0.67   1 
   2 -11   3  707.13    8.52   1 
   2 -11   4   35.72    1.55   1 
   2 -11   5   57.07    1.63   1 
  -2  11 -12   34.73    1.46   1 
  -2  11 -13    0.36    0.53   1 
  -2  11 -14   24.89    1.63   1 
   2 -10 -21    2.50    2.54   1 
   2 -10 -20    4.87    2.68   1 
   2 -10 -19   -1.53    1.84   1 
   2 -10 -18    4.76    2.49   1 
   2 -10 -17    8.57    2.69   1 
   2 -10 -16    0.09    1.59   1 
   2 -10 -15   65.14    5.65   1 
   2 -10 -14   34.46    4.38   1 
   2 -10 -13   49.38    4.67   1 
   2 -10 -12   28.19    3.44   1 
   2 -10 -11    0.64    1.25   1 
   2 -10 -10    1.85    1.42   1 
   2 -10  -9   71.07    4.82   1 
   2 -10  -8    0.27    1.02   1 
   2 -10  -7  180.66    7.01   1 
   2 -10  -6    4.70    1.39   1 
   2 -10  -5  232.37    7.20   1 
   2 -10  -4    1.98    0.96   1 
   2 -10  -3  146.32    5.14   1 
   2 -10  -2   16.21    1.73   1 
   2 -10  -1   17.55    1.66   1 
   2 -10   0   91.93    3.38   1 
   2 -10   1  174.03    4.35   1 
   2 -10   2    5.32    0.89   1 
   2 -10   3  362.18    5.48   1 
   2 -10   4   65.72    1.94   1 
   2 -10   5   94.02    2.00   1 
  -2  10 -10    3.15    0.55   1 
  -2  10 -11   20.38    1.21   1 
  -2  10 -12    8.32    0.98   1 
  -2  10 -13   -0.07    0.62   1 
  -2  10 -14  136.51    3.97   1 
  -2  10 -15    3.73    1.02   1 
  -2  10 -16   16.28    1.79   1 
  -2  10 -17    9.90    1.57   1 
  -2  10 -18   35.55    2.65   1 
   2  -9 -22    0.55    2.52   1 
   2  -9 -21   -0.10    2.11   1 
   2  -9 -20    0.62    2.12   1 
   2  -9 -19    1.29    2.02   1 
   2  -9 -18    1.52    1.88   1 
   2  -9 -17   34.89    4.71   1 
   2  -9 -16   20.93    3.66   1 
   2  -9 -15   85.51    6.24   1 
   2  -9 -14   19.85    3.30   1 
   2  -9 -13    1.12    1.41   1 
   2  -9 -12    3.47    1.64   1 
   2  -9 -11   19.40    2.97   1 
   2  -9 -10    6.34    1.87   1 
   2  -9  -9    0.86    1.09   1 
   2  -9  -8   13.96    2.31   1 
   2  -9  -7    0.64    0.96   1 
   2  -9  -6    9.12    1.72   1 
   2  -9  -5    0.72    0.83   1 
   2  -9  -4  108.39    4.51   1 
   2  -9  -3    5.86    1.20   1 
   2  -9  -2  104.47    3.92   1 
   2  -9  -1   98.19    3.61   1 
   2  -9   0   41.00    2.21   1 
   2  -9   1   57.05    2.39   1 
   2  -9   2   23.74    1.44   1 
   2  -9   3    0.12    0.39   1 
   2  -9   4  107.51    2.34   1 
   2  -9   5   94.42    1.97   1 
  -2   9  -8  477.69    5.58   1 
  -2   9  -9  369.56    4.90   1 
  -2   9 -10   95.86    2.56   1 
  -2   9 -11    8.91    1.02   1 
  -2   9 -12   14.09    1.29   1 
  -2   9 -13    0.66    0.66   1 
  -2   9 -14  103.71    3.68   1 
  -2   9 -15   35.60    2.39   1 
  -2   9 -16  116.01    4.38   1 
  -2   9 -17  127.37    4.92   1 
  -2   9 -18   88.04    4.32   1 
  -2   9 -19   28.17    2.69   1 
  -2   9 -20    1.77    1.21   1 
  -2   9 -21   22.81    2.85   1 
   2  -8 -23   17.02    4.21   1 
   2  -8 -22   59.60    6.41   1 
   2  -8 -21    8.06    2.97   1 
   2  -8 -20   21.47    4.10   1 
   2  -8 -19   -0.09    1.71   1 
   2  -8 -18   20.30    3.72   1 
   2  -8 -17   35.19    4.39   1 
   2  -8 -16   95.40    6.67   1 
   2  -8 -15   33.10    3.93   1 
   2  -8 -14   88.85    6.03   1 
   2  -8 -13    7.40    2.13   1 
   2  -8 -12    0.15    1.04   1 
   2  -8 -11    0.36    1.18   1 
   2  -8 -10    8.96    1.96   1 
   2  -8  -9   99.12    5.38   1 
   2  -8  -8    0.62    0.91   1 
   2  -8  -7  120.59    5.39   1 
   2  -8  -6    0.51    0.80   1 
   2  -8  -5  107.14    4.55   1 
   2  -8  -4   53.49    3.09   1 
   2  -8  -3    0.47    0.60   1 
   2  -8  -2   45.53    2.49   1 
   2  -8  -1    1.19    0.61   1 
   2  -8   0  164.17    4.13   1 
   2  -8   1  145.55    3.60   1 
   2  -8   2    0.27    0.41   1 
   2  -8   3  309.86    4.52   1 
   2  -8   4    4.24    0.57   1 
   2  -8   5    0.19    0.31   1 
  -2   8  -6    5.47    0.64   1 
  -2   8  -7    5.90    0.71   1 
  -2   8  -8   14.52    1.06   1 
  -2   8  -9   70.37    2.31   1 
  -2   8 -10    0.26    0.50   1 
  -2   8 -11   65.14    2.67   1 
  -2   8 -12    5.95    1.06   1 
  -2   8 -13   12.48    1.46   1 
  -2   8 -14   17.06    1.76   1 
  -2   8 -15   -0.27    0.75   1 
  -2   8 -16   60.67    3.39   1 
  -2   8 -17   14.32    2.08   1 
  -2   8 -18  129.58    5.33   1 
  -2   8 -19   68.72    4.17   1 
  -2   8 -20   69.11    4.35   1 
  -2   8 -21   27.17    2.98   1 
  -2   8 -22   73.33    4.80   1 
  -2   8 -23    0.19    1.43   1 
   2  -7 -24    6.30    3.17   1 
   2  -7 -23   11.95    3.69   1 
   2  -7 -22    1.01    2.10   1 
   2  -7 -21   31.53    4.76   1 
   2  -7 -20    0.05    1.86   1 
   2  -7 -19    0.50    1.85   1 
   2  -7 -18   12.39    3.01   1 
   2  -7 -17    2.95    1.94   1 
   2  -7 -16   31.80    4.20   1 
   2  -7 -15    1.87    1.65   1 
   2  -7 -14    2.50    1.57   1 
   2  -7 -13   50.30    4.34   1 
   2  -7 -12   15.91    2.71   1 
   2  -7 -11  166.89    7.31   1 
   2  -7 -10  167.60    7.02   1 
   2  -7  -9   26.24    2.83   1 
   2  -7  -8   61.31    3.94   1 
   2  -7  -7   70.16    4.02   1 
   2  -7  -6    2.48    0.91   1 
   2  -7  -5   93.40    4.09   1 
   2  -7  -4   31.05    2.28   1 
   2  -7  -3  209.15    5.45   1 
   2  -7  -2   35.36    2.13   1 
   2  -7  -1   59.58    2.56   1 
   2  -7   0   46.93    2.10   1 
   2  -7   1   30.36    1.57   1 
   2  -7   2    2.16    0.50   1 
   2  -7   3    2.29    0.48   1 
   2  -7   4  158.59    2.83   1 
   2  -7   5   44.80    1.40   1 
  -2   7  -6   85.12    2.14   1 
  -2   7  -7  245.00    4.07   1 
  -2   7  -8   98.58    2.77   1 
  -2   7  -9   71.51    2.60   1 
  -2   7 -10   35.81    2.00   1 
  -2   7 -11   54.33    2.60   1 
  -2   7 -12  108.81    3.94   1 
  -2   7 -13    1.62    0.90   1 
  -2   7 -14  215.39    6.03   1 
  -2   7 -15    4.45    1.20   1 
  -2   7 -16  162.85    5.75   1 
  -2   7 -17    2.58    1.21   1 
  -2   7 -18    5.66    1.56   1 
  -2   7 -19    0.87    1.11   1 
  -2   7 -20   29.12    3.00   1 
  -2   7 -21    5.65    1.74   1 
  -2   7 -22   47.15    3.98   1 
  -2   7 -23    0.39    1.33   1 
  -2   7 -24   82.15    5.63   1 
   2  -6 -24   80.61    7.39   1 
   2  -6 -23    7.41    3.11   1 
   2  -6 -22   36.59    5.16   1 
   2  -6 -21    0.72    1.93   1 
   2  -6 -20   94.54    7.18   1 
   2  -6 -19   61.60    5.60   1 
   2  -6 -18  180.41    9.27   1 
   2  -6 -17   45.36    4.64   1 
   2  -6 -16  172.19    8.50   1 
   2  -6 -15   13.55    2.71   1 
   2  -6 -14   51.24    4.47   1 
   2  -6 -13   11.56    2.33   1 
   2  -6 -12   49.16    4.08   1 
   2  -6 -11   23.70    2.77   1 
   2  -6 -10    2.23    1.21   1 
   2  -6  -9  128.13    5.73   1 
   2  -6  -8   98.41    4.81   1 
   2  -6  -7    0.12    0.64   1 
   2  -6  -6    5.87    1.30   1 
   2  -6  -5   50.41    2.92   1 
   2  -6  -4    3.39    0.90   1 
   2  -6  -3    2.49    0.74   1 
   2  -6  -2   42.16    2.20   1 
   2  -6  -1    0.45    0.44   1 
   2  -6   0    0.93    0.45   1 
   2  -6   1   98.54    2.62   1 
   2  -6   2  261.34    4.08   1 
   2  -6   3  119.91    2.52   1 
   2  -6   4   15.76    0.95   1 
  -2   6  -5  140.48    2.90   1 
  -2   6  -6   19.84    1.20   1 
  -2   6  -7   52.51    2.01   1 
  -2   6  -8    2.48    0.72   1 
  -2   6  -9    3.96    0.93   1 
  -2   6 -10   10.11    1.33   1 
  -2   6 -11    2.29    0.93   1 
  -2   6 -12   -0.05    0.63   1 
  -2   6 -13   90.75    4.00   1 
  -2   6 -14   24.05    2.26   1 
  -2   6 -15    1.15    0.95   1 
  -2   6 -16    3.84    1.24   1 
  -2   6 -17   40.70    3.19   1 
  -2   6 -18   75.37    4.42   1 
  -2   6 -19    1.64    1.29   1 
  -2   6 -20  108.78    5.65   1 
  -2   6 -21    0.46    1.35   1 
  -2   6 -22    5.64    1.98   1 
  -2   6 -23    0.77    1.55   1 
  -2   6 -24   -0.16    1.59   1 
  -2   6 -25   43.71    4.54   1 
  -2   6 -26    9.12    2.63   1 
   2  -5 -25    1.14    2.51   1 
   2  -5 -24   24.28    4.55   1 
   2  -5 -23   27.27    4.65   1 
   2  -5 -22    4.55    2.39   1 
   2  -5 -21    7.02    2.53   1 
   2  -5 -20    0.34    1.83   1 
   2  -5 -19    0.91    1.65   1 
   2  -5 -18    0.21    1.57   1 
   2  -5 -17    7.57    2.32   1 
   2  -5 -16   25.12    3.60   1 
   2  -5 -15   63.16    4.98   1 
   2  -5 -14   30.77    3.40   1 
   2  -5 -13  161.07    7.29   1 
   2  -5 -12  101.19    5.59   1 
   2  -5 -11  114.37    5.70   1 
   2  -5 -10  139.66    6.03   1 
   2  -5  -9  156.92    6.14   1 
   2  -5  -8    2.60    1.07   1 
   2  -5  -7  653.58   11.56   1 
   2  -5  -6   58.20    3.18   1 
   2  -5  -5  716.96   10.90   1 
   2  -5  -4    0.45    0.54   1 
   2  -5  -3  101.12    3.44   1 
   2  -5  -2   13.84    1.26   1 
   2  -5  -1  122.88    3.33   1 
   2  -5   0   29.29    1.51   1 
   2  -5   1    4.50    0.66   1 
   2  -5   2    0.90    0.37   1 
   2  -5   3  301.43    4.31   1 
   2  -5   4    0.57    0.34   1 
  -2   5  -5  315.18    4.82   1 
  -2   5  -6   19.24    1.29   1 
  -2   5  -7  143.72    3.63   1 
  -2   5  -8    0.16    0.54   1 
  -2   5  -9   20.16    1.69   1 
  -2   5 -10   38.01    2.39   1 
  -2   5 -11    6.26    1.26   1 
  -2   5 -12   32.85    2.48   1 
  -2   5 -13    2.13    0.97   1 
  -2   5 -14   52.26    3.34   1 
  -2   5 -15    1.38    1.03   1 
  -2   5 -16    0.45    0.92   1 
  -2   5 -17    5.70    1.68   1 
  -2   5 -18    1.66    1.27   1 
  -2   5 -19   13.41    2.38   1 
  -2   5 -20    2.60    1.54   1 
  -2   5 -21    1.39    1.38   1 
  -2   5 -22   16.52    2.98   1 
  -2   5 -23    0.39    1.62   1 
  -2   5 -24   -0.32    1.62   1 
  -2   5 -25    0.03    1.72   1 
  -2   5 -26    4.03    2.26   1 
  -2   5 -27    0.05    2.17   1 
   2  -4 -26   24.11    4.80   1 
   2  -4 -25    0.89    2.43   1 
   2  -4 -24    6.28    2.81   1 
   2  -4 -23   15.63    3.68   1 
   2  -4 -22   17.95    3.74   1 
   2  -4 -21  106.95    7.47   1 
   2  -4 -20  138.13    8.27   1 
   2  -4 -19   90.69    6.48   1 
   2  -4 -18  113.55    7.09   1 
   2  -4 -17   20.74    3.35   1 
   2  -4 -16   15.61    2.84   1 
   2  -4 -15   26.32    3.39   1 
   2  -4 -14   17.92    2.84   1 
   2  -4 -13   87.20    5.26   1 
   2  -4 -12    9.65    1.97   1 
   2  -4 -11  217.84    7.59   1 
   2  -4 -10   84.43    4.52   1 
   2  -4  -9   36.79    2.88   1 
   2  -4  -8  102.40    4.50   1 
   2  -4  -7   52.63    3.10   1 
   2  -4  -6  249.29    6.29   1 
   2  -4  -5   17.39    1.63   1 
   2  -4  -4    3.57    0.82   1 
   2  -4  -2   48.43    2.13   1 
   2  -4  -1    6.91    0.82   1 
   2  -4   0  163.57    3.37   1 
   2  -4   1  113.02    2.62   1 
   2  -4   2   87.04    2.23   1 
   2  -4   3  247.60    4.00   1 
  -2   4  -4  170.03    3.49   1 
  -2   4  -5    7.85    0.95   1 
  -2   4  -6  191.71    4.15   1 
  -2   4  -7    1.36    0.64   1 
  -2   4  -8  342.87    6.56   1 
  -2   4  -9   79.27    3.34   1 
  -2   4 -10   46.61    2.75   1 
  -2   4 -11  132.02    4.76   1 
  -2   4 -12    4.98    1.28   1 
  -2   4 -13  134.88    5.23   1 
  -2   4 -14    0.67    0.90   1 
  -2   4 -15    7.07    1.64   1 
  -2   4 -16   91.46    4.85   1 
  -2   4 -17   37.46    3.31   1 
  -2   4 -18  168.78    7.05   1 
  -2   4 -19   43.02    3.79   1 
  -2   4 -20   42.62    3.92   1 
  -2   4 -21   14.36    2.65   1 
  -2   4 -22   15.27    2.89   1 
  -2   4 -23   31.35    4.07   1 
  -2   4 -24    4.46    2.05   1 
  -2   4 -25   55.11    5.18   1 
  -2   4 -26    1.61    2.09   1 
  -2   4 -27    9.01    2.99   1 
  -2   4 -28    5.34    2.83   1 
   2  -3 -26   16.44    4.11   1 
   2  -3 -25    0.93    2.20   1 
   2  -3 -24    4.39    2.49   1 
   2  -3 -23    1.10    1.96   1 
   2  -3 -22   28.85    4.42   1 
   2  -3 -21    2.88    2.00   1 
   2  -3 -20    0.55    1.52   1 
   2  -3 -19    3.15    1.78   1 
   2  -3 -18   15.94    3.05   1 
   2  -3 -17   61.39    5.02   1 
   2  -3 -16   22.38    3.21   1 
   2  -3 -15   83.03    5.39   1 
   2  -3 -14   18.29    2.78   1 
   2  -3 -13   21.69    2.70   1 
   2  -3 -12   27.38    2.88   1 
   2  -3 -11   44.30    3.39   1 
   2  -3 -10    0.42    0.78   1 
   2  -3  -9  403.71    9.16   1 
   2  -3  -8   85.72    4.00   1 
   2  -3  -7  834.30   12.23   1 
   2  -3  -6  155.22    4.69   1 
   2  -3  -5 1156.76   13.43   1 
   2  -3  -4    0.29    0.45   1 
   2  -3  -2    2.97    0.65   1 
   2  -3  -1   47.30    1.84   1 
   2  -3   0  556.30    6.66   1 
   2  -3   1  338.05    4.81   1 
   2  -3   2  571.75    6.71   1 
   2  -3   3  338.10    4.94   1 
  -2   3  -4   57.07    2.12   1 
  -2   3  -5  294.46    5.24   1 
  -2   3  -6   64.77    2.58   1 
  -2   3  -7  529.42    8.15   1 
  -2   3  -8   12.05    1.49   1 
  -2   3  -9   29.08    2.23   1 
  -2   3 -10  222.03    6.17   1 
  -2   3 -11   27.26    2.36   1 
  -2   3 -12   51.66    3.30   1 
  -2   3 -13  107.47    4.82   1 
  -2   3 -14    5.26    1.51   1 
  -2   3 -15    1.79    1.18   1 
  -2   3 -16   67.75    4.36   1 
  -2   3 -17    9.90    2.08   1 
  -2   3 -18    8.65    2.16   1 
  -2   3 -19   -0.19    1.16   1 
  -2   3 -20    1.18    1.35   1 
  -2   3 -21   -0.79    1.31   1 
  -2   3 -22    8.53    2.38   1 
  -2   3 -23    2.22    1.81   1 
  -2   3 -24   21.51    3.63   1 
  -2   3 -25   -0.67    1.81   1 
  -2   3 -26   11.09    3.19   1 
  -2   3 -27    0.60    2.29   1 
   2  -2 -27    3.45    2.82   1 
   2  -2 -26    0.38    2.36   1 
   2  -2 -25    1.63    2.34   1 
   2  -2 -24   16.88    3.75   1 
   2  -2 -23   42.68    5.07   1 
   2  -2 -22   20.12    3.63   1 
   2  -2 -21   65.25    5.69   1 
   2  -2 -20   18.41    3.25   1 
   2  -2 -19    2.65    1.65   1 
   2  -2 -18    1.22    1.33   1 
   2  -2 -17   26.23    3.48   1 
   2  -2 -16    0.68    1.19   1 
   2  -2 -15   45.51    3.96   1 
   2  -2 -14    0.92    1.01   1 
   2  -2 -13  228.40    7.92   1 
   2  -2 -12    1.02    0.95   1 
   2  -2 -11  171.58    6.27   1 
   2  -2 -10    0.17    0.67   1 
   2  -2  -9   25.91    2.25   1 
   2  -2  -8    3.28    1.03   1 
   2  -2  -7    9.77    1.37   1 
   2  -2  -6   24.09    1.82   1 
   2  -2  -5   70.88    2.89   1 
   2  -2  -4   66.57    2.61   1 
   2  -2  -3   21.45    1.42   1 
   2  -2  -2  238.68    4.42   1 
   2  -2  -1   96.70    2.58   1 
   2  -2   0  151.82    3.15   1 
   2  -2   1  354.64    5.08   1 
   2  -2   2   35.43    1.54   1 
  -2   2  -3   40.61    1.84   1 
  -2   2  -4  246.24    4.76   1 
  -2   2  -5    2.44    0.72   1 
  -2   2  -6  442.04    7.36   1 
  -2   2  -7   10.85    1.35   1 
  -2   2  -8  294.18    6.69   1 
  -2   2  -9   37.33    2.57   1 
  -2   2 -10  166.18    5.55   1 
  -2   2 -11   15.55    2.05   1 
  -2   2 -12   93.96    4.56   1 
  -2   2 -13   18.94    2.26   1 
  -2   2 -14  205.39    7.32   1 
  -2   2 -15    0.63    1.05   1 
  -2   2 -16  275.11    8.93   1 
  -2   2 -17   84.96    5.13   1 
  -2   2 -18  157.54    7.20   1 
  -2   2 -19   26.15    3.38   1 
  -2   2 -20   49.00    4.38   1 
  -2   2 -21    4.46    1.95   1 
  -2   2 -22   84.60    6.07   1 
  -2   2 -23   44.90    4.70   1 
  -2   2 -24   48.57    4.96   1 
  -2   2 -25    7.17    2.78   1 
  -2   2 -26   20.98    4.02   1 
  -2   2 -27    0.50    2.19   1 
   2  -1 -27    1.48    2.43   1 
   2  -1 -26    6.24    3.03   1 
   2  -1 -25    1.56    2.19   1 
   2  -1 -24   63.92    6.07   1 
   2  -1 -23    4.96    2.39   1 
   2  -1 -22   75.08    6.21   1 
   2  -1 -21    3.91    2.08   1 
   2  -1 -20    1.52    1.55   1 
   2  -1 -19    0.25    1.44   1 
   2  -1 -18    0.34    1.30   1 
   2  -1 -17  107.68    6.13   1 
   2  -1 -16   13.55    2.40   1 
   2  -1 -15    1.96    1.23   1 
   2  -1 -14   12.68    2.17   1 
   2  -1 -13    6.75    1.66   1 
   2  -1 -12    1.42    0.95   1 
   2  -1 -11   21.60    2.24   1 
   2  -1 -10  144.23    5.26   1 
   2  -1  -9  157.74    5.19   1 
   2  -1  -8   83.68    3.62   1 
   2  -1  -7  214.44    5.48   1 
   2  -1  -6    0.17    0.44   1 
   2  -1  -5   53.08    2.39   1 
   2  -1  -3   91.50    2.75   1 
   2  -1  -1   81.41    2.31   1 
   2  -1   0  786.06    8.44   1 
   2  -1   1  313.37    4.90   1 
   2  -1   2  140.86    3.19   1 
  -2   1  -3  219.39    4.46   1 
  -2   1  -4    4.83    0.90   1 
  -2   1  -5  175.57    4.45   1 
  -2   1  -6   35.83    2.19   1 
  -2   1  -7    2.75    0.93   1 
  -2   1  -8   82.26    3.65   1 
  -2   1  -9  149.04    5.24   1 
  -2   1 -10  117.89    4.85   1 
  -2   1 -11  187.11    6.37   1 
  -2   1 -12    3.20    1.29   1 
  -2   1 -13   52.60    3.66   1 
  -2   1 -14    7.60    1.85   1 
  -2   1 -15    2.42    1.40   1 
  -2   1 -16   16.75    2.60   1 
  -2   1 -17    0.40    1.20   1 
  -2   1 -18    1.11    1.40   1 
  -2   1 -19   41.93    4.05   1 
  -2   1 -20   37.72    4.03   1 
  -2   1 -21   19.23    3.31   1 
  -2   1 -22   32.79    4.06   1 
  -2   1 -23   12.33    3.17   1 
  -2   1 -24   35.48    4.69   1 
  -2   1 -25   18.09    3.73   1 
  -2   1 -26   23.72    4.41   1 
  -2   1 -27   11.00    3.31   1 
   2   0 -28    6.88    3.37   1 
   2   0 -27    1.35    2.40   1 
   2   0 -26    0.06    2.08   1 
   2   0 -25    7.84    2.86   1 
   2   0 -24    2.13    2.10   1 
   2   0 -23   23.99    3.89   1 
   2   0 -22    0.38    1.63   1 
   2   0 -21   11.69    2.75   1 
   2   0 -20   -0.81    1.16   1 
   2   0 -19   10.97    2.37   1 
   2   0 -18    1.72    1.36   1 
   2   0 -17   14.32    2.58   1 
   2   0 -16   25.47    2.96   1 
   2   0 -15   21.94    2.81   1 
   2   0 -14   16.66    2.36   1 
   2   0 -13    1.43    1.01   1 
   2   0 -12   18.53    2.13   1 
   2   0 -11  110.01    4.62   1 
   2   0 -10  112.45    4.49   1 
   2   0  -9   22.52    1.96   1 
   2   0  -8    0.28    0.47   1 
   2   0  -7  209.95    5.19   1 
   2   0  -6   24.53    1.67   1 
   2   0  -5  148.70    3.88   1 
   2   0  -4   20.50    1.35   1 
   2   0  -3  326.88    5.26   1 
   2   0  -2  224.27    4.08   1 
   2   0  -1    3.27    0.57   1 
   2   0   0   40.55    1.71   1 
   2   0   1    0.93    0.41   1 
  -2   0  -2    8.28    1.05   1 
  -2   0  -3    0.60    0.54   1 
  -2   0  -4   -0.13    0.49   1 
  -2   0  -5  108.25    3.68   1 
  -2   0  -6  249.78    5.97   1 
  -2   0  -7  177.48    5.29   1 
  -2   0  -8  106.01    4.36   1 
  -2   0  -9    0.87    0.76   1 
  -2   0 -10   37.01    2.93   1 
  -2   0 -11   40.56    3.16   1 
  -2   0 -12  110.19    5.29   1 
  -2   0 -13   40.02    3.36   1 
  -2   0 -14   88.93    5.15   1 
  -2   0 -15    6.18    1.71   1 
  -2   0 -16  111.13    6.00   1 
  -2   0 -17    0.59    1.35   1 
  -2   0 -18   61.56    4.83   1 
  -2   0 -19    9.54    2.38   1 
  -2   0 -20   66.34    5.30   1 
  -2   0 -21   33.03    4.05   1 
  -2   0 -22  106.86    7.12   1 
  -2   0 -23    8.42    2.70   1 
  -2   0 -24   40.71    4.85   1 
  -2   0 -25   -0.12    2.09   1 
  -2   0 -26    1.81    2.47   1 
   2   1 -28    6.51    3.04   1 
   2   1 -27    1.81    2.20   1 
   2   1 -26   49.72    5.52   1 
   2   1 -25   -0.60    1.89   1 
   2   1 -24  105.06    7.35   1 
   2   1 -23    4.30    2.10   1 
   2   1 -22   33.75    4.00   1 
   2   1 -21   41.08    4.27   1 
   2   1 -20   16.75    2.98   1 
   2   1 -19   36.68    3.83   1 
   2   1 -18   51.72    4.28   1 
   2   1 -17  173.54    7.31   1 
   2   1 -16   65.66    4.34   1 
   2   1 -15    4.12    1.42   1 
   2   1 -14    2.26    1.14   1 
   2   1 -13    3.20    1.09   1 
   2   1 -12   47.44    3.17   1 
   2   1 -11    3.29    1.02   1 
   2   1 -10    3.25    0.99   1 
   2   1  -9   29.57    2.11   1 
   2   1  -8  223.22    5.44   1 
   2   1  -7  356.61    6.57   1 
   2   1  -6  396.23    6.66   1 
   2   1  -5  150.30    3.72   1 
   2   1  -4  165.21    3.70   1 
   2   1  -3  136.18    3.20   1 
   2   1  -2  462.05    6.18   1 
   2   1  -1   15.77    1.13   1 
   2   1   0  227.85    4.28   1 
   2   1   1   12.29    1.06   1 
  -2  -1  -2    0.86    0.58   1 
  -2  -1  -3   34.07    2.01   1 
  -2  -1  -4   34.88    2.09   1 
  -2  -1  -5   74.18    3.19   1 
  -2  -1  -6   30.06    2.24   1 
  -2  -1  -7   34.39    2.54   1 
  -2  -1  -8  226.12    6.66   1 
  -2  -1  -9    4.77    1.37   1 
  -2  -1 -10    5.67    1.44   1 
  -2  -1 -11   20.05    2.41   1 
  -2  -1 -12    2.86    1.32   1 
  -2  -1 -13   51.97    3.91   1 
  -2  -1 -14   41.79    3.73   1 
  -2  -1 -15   71.48    4.81   1 
  -2  -1 -16   28.85    3.23   1 
  -2  -1 -17    0.22    1.09   1 
  -2  -1 -18    1.80    1.51   1 
  -2  -1 -19   12.15    2.76   1 
  -2  -1 -20   27.82    3.92   1 
  -2  -1 -21   17.36    3.31   1 
  -2  -1 -22    6.29    2.37   1 
  -2  -1 -23    0.96    2.08   1 
  -2  -1 -24   11.04    3.13   1 
  -2  -1 -25    9.90    3.16   1 
  -2  -1 -26    0.32    2.43   1 
   2   2 -29    0.63    2.45   1 
   2   2 -28   21.56    4.21   1 
   2   2 -27   32.91    4.90   1 
   2   2 -26   25.24    4.27   1 
   2   2 -25   65.58    5.90   1 
   2   2 -24   25.75    4.03   1 
   2   2 -23   -0.46    1.44   1 
   2   2 -22   10.02    2.47   1 
   2   2 -21   21.84    3.35   1 
   2   2 -20   -0.17    1.21   1 
   2   2 -19   -0.07    1.17   1 
   2   2 -18   17.94    2.74   1 
   2   2 -17    8.75    2.02   1 
   2   2 -16   16.06    2.40   1 
   2   2 -15    6.68    1.58   1 
   2   2 -14   17.63    2.16   1 
   2   2 -13   15.96    1.95   1 
   2   2 -12   29.68    2.44   1 
   2   2 -11  122.57    4.58   1 
   2   2 -10   43.76    2.60   1 
   2   2  -9    0.74    0.58   1 
   2   2  -8    3.32    0.85   1 
   2   2  -7  416.13    6.99   1 
   2   2  -6   89.85    2.94   1 
   2   2  -5  162.93    3.78   1 
   2   2  -4  300.21    5.05   1 
   2   2  -3   22.63    1.31   1 
   2   2  -2    4.26    0.71   1 
   2   2  -1   29.73    1.53   1 
   2   2   0   30.62    1.60   1 
  -2  -2  -1    7.41    1.03   1 
  -2  -2  -2   42.63    2.24   1 
  -2  -2  -3   -0.11    0.46   1 
  -2  -2  -4   22.47    1.86   1 
  -2  -2  -5  522.63    9.13   1 
  -2  -2  -6   38.21    2.60   1 
  -2  -2  -7   71.39    3.67   1 
  -2  -2  -8    5.04    1.39   1 
  -2  -2  -9   41.79    3.11   1 
  -2  -2 -10   23.17    2.56   1 
  -2  -2 -11   49.60    3.70   1 
  -2  -2 -12  104.93    5.43   1 
  -2  -2 -13    2.66    1.40   1 
  -2  -2 -14   19.48    2.87   1 
  -2  -2 -15   44.27    3.89   1 
  -2  -2 -16    0.10    1.27   1 
  -2  -2 -17   54.58    4.57   1 
  -2  -2 -18    0.56    1.47   1 
  -2  -2 -19  128.27    7.34   1 
  -2  -2 -20    8.55    2.48   1 
  -2  -2 -21   25.24    3.95   1 
  -2  -2 -22   38.76    4.64   1 
  -2  -2 -23   -0.75    1.68   1 
  -2  -2 -24    1.98    2.17   1 
  -2  -2 -25    2.39    2.51   1 
   2   3 -29   18.33    4.11   1 
   2   3 -28    4.64    2.70   1 
   2   3 -27    1.52    2.18   1 
   2   3 -26    0.87    1.98   1 
   2   3 -25    5.92    2.43   1 
   2   3 -24   -0.24    1.56   1 
   2   3 -23   35.82    4.06   1 
   2   3 -22    0.57    1.53   1 
   2   3 -21  141.33    7.30   1 
   2   3 -20   17.60    2.86   1 
   2   3 -19  174.97    7.53   1 
   2   3 -18  138.14    6.45   1 
   2   3 -17   54.34    3.93   1 
   2   3 -16    1.24    1.04   1 
   2   3 -15   28.25    2.67   1 
   2   3 -14  172.82    6.10   1 
   2   3 -13  302.28    7.71   1 
   2   3 -12   76.81    3.67   1 
   2   3 -11  299.28    6.93   1 
   2   3 -10  319.06    6.76   1 
   2   3  -9   30.25    1.95   1 
   2   3  -8  589.80    8.55   1 
   2   3  -7    0.28    0.41   1 
   2   3  -6   18.67    1.35   1 
   2   3  -5    0.00    0.35   1 
   2   3  -4    1.22    0.48   1 
   2   3  -3 1028.14   10.52   1 
   2   3  -2    5.66    0.82   1 
   2   3  -1   27.81    1.56   1 
  -2  -3   0   34.51    1.91   1 
  -2  -3  -1    3.50    0.82   1 
  -2  -3  -2   20.84    1.66   1 
  -2  -3  -3  106.40    3.79   1 
  -2  -3  -4   92.69    3.72   1 
  -2  -3  -5   81.96    3.67   1 
  -2  -3  -6   48.64    3.02   1 
  -2  -3  -7   10.64    1.70   1 
  -2  -3  -8   41.26    3.17   1 
  -2  -3  -9   -0.14    0.84   1 
  -2  -3 -10   68.81    4.26   1 
  -2  -3 -11   81.39    4.72   1 
  -2  -3 -12    0.04    1.10   1 
  -2  -3 -13  117.42    6.09   1 
  -2  -3 -14    1.14    1.35   1 
  -2  -3 -15   12.68    2.52   1 
  -2  -3 -16    1.94    1.49   1 
  -2  -3 -17    0.50    1.31   1 
  -2  -3 -18   21.11    3.43   1 
  -2  -3 -19   -0.86    1.45   1 
  -2  -3 -20    8.58    2.60   1 
  -2  -3 -21    1.40    1.91   1 
  -2  -3 -22    6.96    2.69   1 
  -2  -3 -23   -0.24    1.86   1 
  -2  -3 -24    2.46    2.33   1 
  -2  -3 -25   47.16    5.66   1 
   2   4 -29   63.31    6.26   1 
   2   4 -28    9.67    3.06   1 
   2   4 -27   76.09    6.37   1 
   2   4 -26   17.06    3.48   1 
   2   4 -25   49.13    4.86   1 
   2   4 -24    5.82    2.18   1 
   2   4 -23   15.06    2.93   1 
   2   4 -22    1.00    1.33   1 
   2   4 -21   38.67    3.83   1 
   2   4 -20    2.57    1.42   1 
   2   4 -19   37.10    3.48   1 
   2   4 -18    5.85    1.63   1 
   2   4 -17    7.18    1.69   1 
   2   4 -16   22.08    2.41   1 
   2   4 -15   12.79    1.90   1 
   2   4 -14   29.12    2.46   1 
   2   4 -13   21.75    2.08   1 
   2   4 -12   55.01    3.00   1 
   2   4 -11    0.13    0.56   1 
   2   4 -10   68.25    2.99   1 
   2   4  -9    2.58    0.72   1 
   2   4  -8  106.89    3.32   1 
   2   4  -7   24.27    1.57   1 
   2   4  -6   19.01    1.33   1 
   2   4  -5  202.46    4.11   1 
   2   4  -4  203.26    4.13   1 
   2   4  -3   20.61    1.35   1 
   2   4  -2  190.16    4.12   1 
  -2  -4   1   98.27    3.18   1 
  -2  -4   0   56.84    2.50   1 
  -2  -4  -1   71.79    2.97   1 
  -2  -4  -2  228.08    5.54   1 
  -2  -4  -3  494.48    8.73   1 
  -2  -4  -4   79.99    3.63   1 
  -2  -4  -5  324.66    7.62   1 
  -2  -4  -6    6.75    1.42   1 
  -2  -4  -7    3.89    1.29   1 
  -2  -4  -8   46.18    3.38   1 
  -2  -4  -9    4.63    1.45   1 
  -2  -4 -10  168.04    6.83   1 
  -2  -4 -11   32.61    3.19   1 
  -2  -4 -12  127.96    6.22   1 
  -2  -4 -13    1.37    1.45   1 
  -2  -4 -14    0.02    1.23   1 
  -2  -4 -15   24.35    3.38   1 
  -2  -4 -16    3.18    1.79   1 
  -2  -4 -17   41.12    4.23   1 
  -2  -4 -18   13.29    2.93   1 
  -2  -4 -19   29.60    4.16   1 
  -2  -4 -20    1.19    1.97   1 
  -2  -4 -21    0.29    1.87   1 
  -2  -4 -22   -0.91    1.96   1 
  -2  -4 -23    0.50    2.27   1 
  -2  -4 -24   24.26    4.49   1 
   2   5 -30    0.90    2.40   1 
   2   5 -29    6.08    2.72   1 
   2   5 -28    0.18    1.96   1 
   2   5 -27    2.29    2.15   1 
   2   5 -26   18.51    3.40   1 
   2   5 -25    4.35    2.04   1 
   2   5 -24   52.01    4.65   1 
   2   5 -23   43.38    4.16   1 
   2   5 -22    3.94    1.68   1 
   2   5 -21   80.04    5.18   1 
   2   5 -20   16.07    2.61   1 
   2   5 -19   79.15    4.79   1 
   2   5 -18    0.73    0.95   1 
   2   5 -17  115.92    5.26   1 
   2   5 -16  337.33    8.69   1 
   2   5 -15  504.18   10.24   1 
   2   5 -14  141.07    5.09   1 
   2   5 -13  491.50    9.28   1 
   2   5 -12   17.01    1.65   1 
   2   5 -11  158.85    4.63   1 
   2   5 -10   19.88    1.62   1 
   2   5  -9  111.55    3.46   1 
   2   5  -8    7.29    1.00   1 
   2   5  -7   83.80    2.77   1 
   2   5  -6    0.25    0.41   1 
   2   5  -5   66.14    2.34   1 
   2   5  -4  358.40    5.76   1 
   2   5  -3 1177.23   11.89   1 
   2   5  -2   21.53    1.44   1 
  -2  -5   1  116.93    3.59   1 
  -2  -5   0   33.60    2.05   1 
  -2  -5  -1   39.18    2.28   1 
  -2  -5  -2  229.43    5.79   1 
  -2  -5  -3   13.48    1.63   1 
  -2  -5  -4   61.00    3.32   1 
  -2  -5  -5   48.16    3.14   1 
  -2  -5  -6    0.46    0.88   1 
  -2  -5  -7   32.49    2.92   1 
  -2  -5  -8  197.89    7.03   1 
  -2  -5  -9   11.10    2.05   1 
  -2  -5 -10   45.04    3.74   1 
  -2  -5 -11   31.72    3.23   1 
  -2  -5 -12    4.75    1.79   1 
  -2  -5 -13    1.11    1.24   1 
  -2  -5 -14   46.40    4.13   1 
  -2  -5 -15   23.04    3.32   1 
  -2  -5 -16   47.47    4.46   1 
  -2  -5 -17    2.69    1.94   1 
  -2  -5 -18   38.43    4.35   1 
  -2  -5 -19   -0.18    1.56   1 
  -2  -5 -20    9.53    2.88   1 
  -2  -5 -21    0.59    1.97   1 
  -2  -5 -22   -0.35    1.96   1 
  -2  -5 -23   17.05    3.89   1 
   2   6 -30    1.68    2.58   1 
   2   6 -29   37.97    5.01   1 
   2   6 -28    1.36    2.05   1 
   2   6 -27   38.99    4.56   1 
   2   6 -26    0.83    1.70   1 
   2   6 -25    9.16    2.52   1 
   2   6 -24    0.23    1.45   1 
   2   6 -23   23.64    3.27   1 
   2   6 -22   23.47    3.13   1 
   2   6 -21  172.33    7.30   1 
   2   6 -20    6.02    1.71   1 
   2   6 -19   19.29    2.41   1 
   2   6 -18   43.24    3.33   1 
   2   6 -17    9.09    1.69   1 
   2   6 -16   23.87    2.31   1 
   2   6 -15    2.65    1.10   1 
   2   6 -14    5.15    1.21   1 
   2   6 -13  198.06    5.59   1 
   2   6 -12    1.43    0.70   1 
   2   6 -11   94.78    3.47   1 
   2   6 -10  188.16    4.63   1 
   2   6  -9    2.54    0.68   1 
   2   6  -8   67.23    2.50   1 
   2   6  -7   18.42    1.33   1 
   2   6  -6  331.72    5.53   1 
   2   6  -5   84.77    2.71   1 
   2   6  -4  192.65    4.21   1 
   2   6  -3    2.51    0.65   1 
  -2  -6   2  122.53    3.69   1 
  -2  -6   1   14.03    1.44   1 
  -2  -6   0  768.74   10.66   1 
  -2  -6  -1   73.47    3.25   1 
  -2  -6  -2  380.30    7.83   1 
  -2  -6  -3   57.48    3.19   1 
  -2  -6  -4    2.70    1.01   1 
  -2  -6  -5    0.86    0.85   1 
  -2  -6  -6  230.45    7.26   1 
  -2  -6  -7   -0.27    0.84   1 
  -2  -6  -8  403.56   10.42   1 
  -2  -6  -9    0.79    1.17   1 
  -2  -6 -10  385.46   10.85   1 
  -2  -6 -11    1.23    1.30   1 
  -2  -6 -12   35.65    3.65   1 
  -2  -6 -13   11.63    2.39   1 
  -2  -6 -14   -0.51    1.22   1 
  -2  -6 -15   48.39    4.48   1 
  -2  -6 -16    0.70    1.39   1 
  -2  -6 -17    9.81    2.70   1 
  -2  -6 -18   11.50    2.78   1 
  -2  -6 -19    1.68    1.92   1 
  -2  -6 -20    1.05    1.97   1 
  -2  -6 -21   10.28    3.23   1 
  -2  -6 -22    8.59    3.12   1 
  -2  -6 -23   -0.60    2.33   1 
   2   7 -28    9.25    2.95   1 
   2   7 -27    4.09    2.33   1 
   2   7 -26   25.51    3.73   1 
   2   7 -25    6.94    2.22   1 
   2   7 -24    7.61    2.16   1 
   2   7 -23    1.85    1.47   1 
   2   7 -22    6.64    1.87   1 
   2   7 -21    0.23    1.18   1 
   2   7 -20    0.82    1.20   1 
   2   7 -19    2.13    1.15   1 
   2   7 -18  231.75    7.34   1 
   2   7 -17   47.82    3.19   1 
   2   7 -16   92.32    4.19   1 
   2   7 -15  195.73    5.91   1 
   2   7 -14   13.31    1.63   1 
   2   7 -13   74.08    3.28   1 
   2   7 -12  108.03    3.74   1 
   2   7 -11   13.31    1.37   1 
   2   7 -10  315.53    5.96   1 
   2   7  -9    0.17    0.49   1 
   2   7  -8  489.83    7.03   1 
   2   7  -7    3.88    0.82   1 
   2   7  -6  348.60    5.74   1 
   2   7  -5  373.89    6.06   1 
   2   7  -4   29.67    1.69   1 
  -2  -7   3  111.93    3.53   1 
  -2  -7   2    2.65    0.83   1 
  -2  -7   1   54.65    2.72   1 
  -2  -7   0  272.72    6.27   1 
  -2  -7  -1   14.53    1.70   1 
  -2  -7  -2  239.51    6.38   1 
  -2  -7  -3  295.90    7.45   1 
  -2  -7  -4    1.62    1.01   1 
  -2  -7  -5   19.64    2.31   1 
  -2  -7  -6   10.84    1.95   1 
  -2  -7  -7   -0.23    0.87   1 
  -2  -7  -8    0.63    1.09   1 
  -2  -7  -9   17.08    2.64   1 
  -2  -7 -10   -0.31    0.96   1 
  -2  -7 -11   -0.06    1.06   1 
  -2  -7 -12   10.66    2.39   1 
  -2  -7 -13  128.32    6.84   1 
  -2  -7 -14   55.76    4.80   1 
  -2  -7 -15   37.60    4.13   1 
  -2  -7 -16   22.19    3.64   1 
  -2  -7 -17   17.12    3.36   1 
  -2  -7 -18   -0.13    1.85   1 
  -2  -7 -19   34.00    4.75   1 
  -2  -7 -20    3.45    2.31   1 
  -2  -7 -21   23.92    4.39   1 
  -2  -7 -22   10.48    3.41   1 
   2   8 -27    1.79    1.93   1 
   2   8 -26    0.78    1.57   1 
   2   8 -25    0.50    1.51   1 
   2   8 -24   10.85    2.36   1 
   2   8 -23   13.20    2.43   1 
   2   8 -22   15.52    2.51   1 
   2   8 -21   21.39    2.63   1 
   2   8 -20   10.10    1.88   1 
   2   8 -19   15.05    2.16   1 
   2   8 -18    1.19    0.99   1 
   2   8 -17   -0.01    0.80   1 
   2   8 -16    2.42    1.02   1 
   2   8 -15   68.85    3.39   1 
   2   8 -14    6.09    1.22   1 
   2   8 -13   85.29    3.40   1 
   2   8 -12   35.69    2.15   1 
   2   8 -11    1.63    0.70   1 
   2   8 -10    9.29    1.12   1 
   2   8  -9   50.74    2.20   1 
   2   8  -8    6.14    0.91   1 
   2   8  -7   12.63    1.18   1 
   2   8  -6   21.83    1.49   1 
   2   8  -5    0.06    0.45   1 
  -2  -8   4   69.53    2.84   1 
  -2  -8   3   26.68    1.86   1 
  -2  -8   2  447.33    7.86   1 
  -2  -8   1    0.75    0.67   1 
  -2  -8   0  548.45    9.48   1 
  -2  -8  -1   23.32    2.10   1 
  -2  -8  -2   44.99    2.95   1 
  -2  -8  -3   92.77    4.38   1 
  -2  -8  -4   64.49    3.88   1 
  -2  -8  -5  258.43    7.96   1 
  -2  -8  -6  208.44    7.34   1 
  -2  -8  -7   27.13    2.92   1 
  -2  -8  -8  127.09    6.12   1 
  -2  -8  -9    0.14    1.15   1 
  -2  -8 -10   99.41    5.71   1 
  -2  -8 -11   18.54    2.93   1 
  -2  -8 -12   12.09    2.53   1 
  -2  -8 -13  155.32    7.77   1 
  -2  -8 -14   27.18    3.65   1 
  -2  -8 -15   99.76    6.57   1 
  -2  -8 -16   70.07    5.74   1 
  -2  -8 -17    8.78    2.69   1 
  -2  -8 -18    5.74    2.33   1 
  -2  -8 -19    2.43    2.12   1 
  -2  -8 -20    0.71    2.19   1 
  -2  -8 -21    0.51    2.26   1 
   2   9 -25   64.74    4.87   1 
   2   9 -24    6.16    1.93   1 
   2   9 -23    0.68    1.34   1 
   2   9 -22    4.71    1.66   1 
   2   9 -21    0.22    1.09   1 
   2   9 -20    7.55    1.74   1 
   2   9 -19    0.57    0.85   1 
   2   9 -18   12.32    1.84   1 
   2   9 -17   39.92    2.80   1 
   2   9 -16   32.58    2.46   1 
   2   9 -15   67.43    3.24   1 
   2   9 -14   31.93    2.26   1 
   2   9 -13   39.26    2.28   1 
   2   9 -12  125.39    3.83   1 
   2   9 -11    0.58    0.61   1 
   2   9 -10  584.47    8.00   1 
   2   9  -9   17.94    1.43   1 
   2   9  -8  221.69    4.60   1 
   2   9  -7    5.05    0.88   1 
   2   9  -6   60.86    2.42   1 
  -2  -9   5   62.16    2.69   1 
  -2  -9   4    0.30    0.61   1 
  -2  -9   3   83.00    3.33   1 
  -2  -9   2   90.20    3.59   1 
  -2  -9   1   16.14    1.72   1 
  -2  -9   0   45.36    2.85   1 
  -2  -9  -1   28.50    2.38   1 
  -2  -9  -2   60.95    3.56   1 
  -2  -9  -3    9.65    1.80   1 
  -2  -9  -4    2.36    1.28   1 
  -2  -9  -5    1.57    1.20   1 
  -2  -9  -6    3.15    1.46   1 
  -2  -9  -7    2.17    1.33   1 
  -2  -9  -8   -0.09    0.96   1 
  -2  -9  -9    0.92    1.11   1 
  -2  -9 -10    2.16    1.40   1 
  -2  -9 -11   95.30    5.87   1 
  -2  -9 -12   -0.45    1.36   1 
  -2  -9 -13   33.18    3.77   1 
  -2  -9 -14    2.32    1.76   1 
  -2  -9 -15   22.69    3.75   1 
  -2  -9 -16    2.35    1.94   1 
  -2  -9 -17   64.18    5.81   1 
  -2  -9 -18    1.44    2.05   1 
  -2  -9 -19   52.02    5.50   1 
  -2  -9 -20    0.44    2.10   1 
   2  10 -23    1.01    1.29   1 
   2  10 -22   11.56    2.10   1 
   2  10 -21   71.59    4.21   1 
   2  10 -20    3.64    1.32   1 
   2  10 -19   67.77    3.85   1 
   2  10 -18   11.76    1.76   1 
   2  10 -17   28.42    2.32   1 
   2  10 -16    3.29    1.02   1 
   2  10 -15   20.45    1.87   1 
   2  10 -14   11.81    1.43   1 
   2  10 -13    7.48    1.15   1 
   2  10 -12   60.51    2.58   1 
   2  10 -11   90.28    3.02   1 
   2  10 -10    0.44    0.55   1 
   2  10  -9  163.76    3.91   1 
   2  10  -8  115.96    3.30   1 
   2  10  -7    1.58    0.67   1 
  -2 -10   6   27.92    1.88   1 
  -2 -10   5  107.55    3.63   1 
  -2 -10   4  489.80    8.24   1 
  -2 -10   3   12.87    1.55   1 
  -2 -10   2  454.48    8.51   1 
  -2 -10   1    0.18    0.70   1 
  -2 -10   0    9.55    1.62   1 
  -2 -10  -1   48.57    3.17   1 
  -2 -10  -2    0.39    0.89   1 
  -2 -10  -3  216.29    7.17   1 
  -2 -10  -4  113.85    5.40   1 
  -2 -10  -5   69.02    4.39   1 
  -2 -10  -6   94.59    5.25   1 
  -2 -10  -7   -0.49    1.09   1 
  -2 -10  -8   10.66    2.21   1 
  -2 -10  -9    3.38    1.69   1 
  -2 -10 -10    2.25    1.51   1 
  -2 -10 -11   76.63    5.39   1 
  -2 -10 -12    0.31    1.44   1 
  -2 -10 -13   66.58    5.34   1 
  -2 -10 -14   95.72    6.52   1 
  -2 -10 -15    4.64    2.11   1 
  -2 -10 -16   34.72    4.62   1 
  -2 -10 -17   -0.71    1.87   1 
  -2 -10 -18    0.52    1.88   1 
  -2 -10 -19   14.47    3.45   1 
  -2 -10 -20    5.63    2.96   1 
   2  11 -21   15.90    2.30   1 
   2  11 -20    9.78    1.83   1 
   2  11 -19  120.62    4.90   1 
   2  11 -18    7.68    1.52   1 
   2  11 -17  118.89    4.45   1 
   2  11 -16   79.83    3.52   1 
   2  11 -15   98.50    3.66   1 
   2  11 -14    1.12    0.77   1 
   2  11 -13    0.41    0.67   1 
   2  11 -12    6.39    1.05   1 
   2  11 -11   47.10    2.15   1 
   2  11 -10  103.91    3.15   1 
   2  11  -9  260.57    5.03   1 
  -2 -11   7    0.55    0.68   1 
  -2 -11   6   30.59    2.05   1 
  -2 -11   5   63.14    2.94   1 
  -2 -11   4   69.01    3.13   1 
  -2 -11   3  177.28    5.22   1 
  -2 -11   2    0.17    0.79   1 
  -2 -11   1   19.31    2.00   1 
  -2 -11   0   95.73    4.37   1 
  -2 -11  -1    0.50    0.88   1 
  -2 -11  -2   37.83    3.10   1 
  -2 -11  -3   11.05    2.04   1 
  -2 -11  -4   46.11    3.65   1 
  -2 -11  -5    8.52    1.95   1 
  -2 -11  -6    9.71    2.16   1 
  -2 -11  -7    1.67    1.37   1 
  -2 -11  -8   20.69    3.03   1 
  -2 -11  -9   27.28    3.29   1 
  -2 -11 -10    9.67    2.32   1 
  -2 -11 -11   24.40    3.55   1 
  -2 -11 -12    0.27    1.46   1 
  -2 -11 -13    0.07    1.51   1 
  -2 -11 -14    2.22    1.97   1 
  -2 -11 -15    5.83    2.41   1 
  -2 -11 -16    6.94    2.73   1 
  -2 -11 -17   18.02    3.75   1 
  -2 -11 -18   -0.64    2.15   1 
  -2 -11 -19   25.08    4.65   1 
   2  12 -18   33.88    2.55   1 
   2  12 -17   15.99    1.83   1 
   2  12 -16   42.68    2.52   1 
   2  12 -15   77.95    3.15   1 
   2  12 -14  115.14    3.56   1 
   2  12 -13  101.16    3.22   1 
   2  12 -12  107.77    3.24   1 
   2  12 -11  205.17    4.48   1 
   2  12 -10   13.18    1.32   1 
  -2 -12   9    3.10    0.91   1 
  -2 -12   8   45.43    2.38   1 
  -2 -12   7   44.58    2.42   1 
  -2 -12   6  422.08    7.49   1 
  -2 -12   5  347.22    7.03   1 
  -2 -12   4  134.47    4.53   1 
  -2 -12   3  132.15    4.64   1 
  -2 -12   2  100.26    4.24   1 
  -2 -12   1   -0.01    0.82   1 
  -2 -12   0   50.22    3.42   1 
  -2 -12  -1    0.37    1.00   1 
  -2 -12  -2   78.72    4.46   1 
  -2 -12  -3    9.74    2.01   1 
  -2 -12  -4  139.03    6.27   1 
  -2 -12  -5   -0.37    1.13   1 
  -2 -12  -6    5.27    1.73   1 
  -2 -12  -7   -1.08    1.13   1 
  -2 -12  -8   38.81    3.80   1 
  -2 -12  -9    8.98    2.40   1 
  -2 -12 -10   10.46    2.50   1 
  -2 -12 -11   12.12    2.68   1 
  -2 -12 -12    0.87    1.64   1 
  -2 -12 -13    3.08    1.98   1 
  -2 -12 -14   10.64    2.87   1 
  -2 -12 -15    5.81    2.58   1 
  -2 -12 -16    4.19    2.53   1 
  -2 -12 -17   -0.06    2.08   1 
  -2 -12 -18    6.05    2.98   1 
   2  13 -15    6.41    1.14   1 
   2  13 -14   15.81    1.47   1 
   2  13 -13   36.42    1.94   1 
   2  13 -12    5.95    1.00   1 
   2  13 -11  252.56    4.90   1 
  -2 -13  10    6.68    1.20   1 
  -2 -13   9  107.36    3.51   1 
  -2 -13   8   26.07    1.92   1 
  -2 -13   7   11.47    1.49   1 
  -2 -13   6   41.00    2.49   1 
  -2 -13   5    7.23    1.37   1 
  -2 -13   4    6.47    1.36   1 
  -2 -13   3   -0.01    0.81   1 
  -2 -13   2  147.75    5.36   1 
  -2 -13   1   56.15    3.55   1 
  -2 -13   0   55.74    3.75   1 
  -2 -13  -1    2.57    1.42   1 
  -2 -13  -2   98.55    5.11   1 
  -2 -13  -3    0.42    1.22   1 
  -2 -13  -4  121.95    6.06   1 
  -2 -13  -5    1.58    1.42   1 
  -2 -13  -6   53.11    4.31   1 
  -2 -13  -7   80.08    5.37   1 
  -2 -13  -8   63.33    4.91   1 
  -2 -13  -9   56.36    4.76   1 
  -2 -13 -10   45.67    4.41   1 
  -2 -13 -11   -0.06    1.56   1 
  -2 -13 -12    2.45    1.98   1 
  -2 -13 -13    0.04    1.67   1 
  -2 -13 -14    0.38    1.93   1 
  -2 -13 -15   23.32    4.12   1 
  -2 -13 -16    0.81    2.23   1 
  -2 -13 -17    8.72    3.23   1 
  -2 -14  11    0.98    0.85   1 
  -2 -14  10  125.94    3.79   1 
  -2 -14   9   14.47    1.59   1 
  -2 -14   8  654.40    9.43   1 
  -2 -14   7   61.44    3.00   1 
  -2 -14   6  230.21    5.85   1 
  -2 -14   5   32.06    2.43   1 
  -2 -14   4   48.62    3.04   1 
  -2 -14   3    2.57    1.15   1 
  -2 -14   2   10.70    1.84   1 
  -2 -14   1    0.62    1.07   1 
  -2 -14   0  265.30    8.03   1 
  -2 -14  -1    0.00    1.06   1 
  -2 -14  -3   -0.31    1.10   1 
  -2 -14  -4   51.43    4.05   1 
  -2 -14  -5    0.16    1.26   1 
  -2 -14  -6   37.86    3.74   1 
  -2 -14  -7   -0.08    1.33   1 
  -2 -14  -8   11.51    2.54   1 
  -2 -14  -9    2.49    1.72   1 
  -2 -14 -10    3.55    1.99   1 
  -2 -14 -11    5.56    2.24   1 
  -2 -14 -12    1.59    1.95   1 
  -2 -14 -13   28.31    4.23   1 
  -2 -14 -14    3.69    2.33   1 
  -2 -14 -15   17.93    3.78   1 
  -2 -14 -16    3.14    2.53   1 
  -2 -15  11   57.17    2.57   1 
  -2 -15  10   50.24    2.48   1 
  -2 -15   9    0.66    0.85   1 
  -2 -15   8    1.39    0.95   1 
  -2 -15   7    1.95    1.04   1 
  -2 -15   6    1.46    0.96   1 
  -2 -15   5    7.91    1.51   1 
  -2 -15   4    4.74    1.41   1 
  -2 -15   3   65.42    3.83   1 
  -2 -15   2    1.32    1.13   1 
  -2 -15   1   28.89    2.87   1 
  -2 -15   0   41.56    3.43   1 
  -2 -15  -1    1.27    1.26   1 
  -2 -15  -2   25.57    2.93   1 
  -2 -15  -3   37.93    3.55   1 
  -2 -15  -4   27.12    3.23   1 
  -2 -15  -5  196.50    8.13   1 
  -2 -15  -6   44.41    4.14   1 
  -2 -15  -7   42.28    4.14   1 
  -2 -15  -8   68.15    5.27   1 
  -2 -15  -9    9.77    2.58   1 
  -2 -15 -10   10.85    2.92   1 
  -2 -15 -11    8.68    2.65   1 
  -2 -15 -12    3.99    2.31   1 
  -2 -15 -13   33.40    4.74   1 
  -2 -15 -14    4.05    2.56   1 
  -2 -15 -15   36.57    5.29   1 
  -2 -16   9    5.42    1.23   1 
  -2 -16   8  198.36    5.25   1 
  -2 -16   7    0.10    0.93   1 
  -2 -16   6   15.36    1.92   1 
  -2 -16   5   87.80    4.13   1 
  -2 -16   4    7.46    1.70   1 
  -2 -16   3  110.90    4.98   1 
  -2 -16   2   81.41    4.41   1 
  -2 -16   1   41.65    3.48   1 
  -2 -16   0  165.24    6.67   1 
  -2 -16  -1   -1.38    1.09   1 
  -2 -16  -2   36.47    3.53   1 
  -2 -16  -3    0.84    1.24   1 
  -2 -16  -4    0.36    1.37   1 
  -2 -16  -5   11.05    2.52   1 
  -2 -16  -6    1.01    1.49   1 
  -2 -16  -7   31.20    3.72   1 
  -2 -16  -8   38.41    4.17   1 
  -2 -16  -9   -0.41    1.77   1 
  -2 -16 -10   18.43    3.49   1 
  -2 -16 -11    1.15    2.01   1 
  -2 -16 -12    2.90    2.27   1 
  -2 -16 -13   17.23    3.81   1 
  -2 -16 -14   -0.20    2.26   1 
  -2 -17   7   18.62    2.02   1 
  -2 -17   6   11.58    1.86   1 
  -2 -17   5   26.44    2.55   1 
  -2 -17   4   -0.12    1.11   1 
  -2 -17   3   23.40    2.65   1 
  -2 -17   2    4.34    1.59   1 
  -2 -17   1   -1.78    1.08   1 
  -2 -17   0    4.66    1.64   1 
  -2 -17  -1    5.46    1.91   1 
  -2 -17  -2    0.04    1.27   1 
  -2 -17  -3  133.08    6.62   1 
  -2 -17  -4    2.14    1.57   1 
  -2 -17  -5   38.20    3.94   1 
  -2 -17  -6    0.41    1.55   1 
  -2 -17  -7   11.92    2.87   1 
  -2 -17  -8    1.80    1.82   1 
  -2 -17  -9    8.32    2.73   1 
  -2 -17 -10   -1.27    1.84   1 
  -2 -17 -11   26.34    4.25   1 
  -2 -17 -12   -0.17    2.14   1 
  -2 -17 -13   64.38    6.37   1 
  -2 -18   4    1.52    1.27   1 
  -2 -18   3   89.03    4.65   1 
  -2 -18   2   17.93    2.55   1 
  -2 -18   1   32.27    3.28   1 
  -2 -18   0    9.90    2.19   1 
  -2 -18  -1    2.11    1.56   1 
  -2 -18  -2    7.54    2.06   1 
  -2 -18  -3   31.20    3.56   1 
  -2 -18  -4    6.08    2.05   1 
  -2 -18  -5   47.56    4.38   1 
  -2 -18  -6   22.20    3.53   1 
  -2 -18  -7    7.70    2.47   1 
  -2 -18  -8   35.72    4.34   1 
  -2 -18  -9    0.65    2.16   1 
  -2 -18 -10    1.70    2.26   1 
  -2 -18 -11   -0.31    2.13   1 
  -2 -19   2    2.27    1.41   1 
  -2 -19   1    3.58    1.64   1 
  -2 -19   0   -1.61    1.33   1 
  -2 -19  -1   17.71    2.78   1 
  -2 -19  -2   -0.13    1.46   1 
  -2 -19  -3   20.66    3.22   1 
  -2 -19  -4   -0.09    1.57   1 
  -2 -19  -5   -1.09    1.54   1 
  -2 -19  -6    0.25    1.85   1 
  -2 -19  -7    0.24    2.03   1 
  -2 -19  -8    1.56    2.28   1 
  -2 -19  -9    7.87    2.82   1 
  -2 -19 -10   14.49    3.63   1 
  -2 -20  -2   27.70    3.38   1 
  -2 -20  -3    3.21    1.98   1 
  -2 -20  -4    0.98    1.77   1 
  -2 -20  -5    3.07    2.16   1 
  -2 -20  -6    1.54    2.05   1 
  -2 -20  -7    1.72    2.16   1 
  -2 -20  -8    2.98    2.32   1 
  -2 -20  -9    0.43    2.34   1 
  -2 -21  -7    0.82    2.35   1 
   3 -19 -12    0.29    2.22   1 
   3 -19 -11    1.23    2.32   1 
   3 -19 -10   -1.07    1.89   1 
   3 -19  -9    0.44    2.02   1 
   3 -19  -8   -0.23    1.72   1 
   3 -19  -7    0.50    1.82   1 
   3 -19  -6   -0.19    1.58   1 
   3 -18 -13    4.87    2.68   1 
   3 -18 -12    0.49    2.15   1 
   3 -18 -11    0.50    2.02   1 
   3 -18 -10    2.86    2.19   1 
   3 -18  -9   18.63    3.51   1 
   3 -18  -8    0.26    1.65   1 
   3 -18  -7    6.47    2.28   1 
   3 -18  -6    3.80    1.94   1 
   3 -18  -5    0.76    1.53   1 
   3 -18  -4    2.63    1.60   1 
   3 -18  -3   10.85    2.23   1 
   3 -18  -2   11.97    2.19   1 
   3 -17 -14    1.35    2.42   1 
   3 -17 -13    3.65    2.56   1 
   3 -17 -12    0.10    2.05   1 
   3 -17 -11    1.01    1.91   1 
   3 -17 -10   16.02    3.28   1 
   3 -17  -9    4.80    2.04   1 
   3 -17  -8   19.43    3.35   1 
   3 -17  -7   44.27    4.31   1 
   3 -17  -6   19.01    3.03   1 
   3 -17  -5   10.79    2.38   1 
   3 -17  -4   -0.46    1.10   1 
   3 -17  -3    0.07    1.11   1 
   3 -17  -2    0.93    1.27   1 
   3 -17  -1    1.39    1.17   1 
   3 -17   0   30.22    2.70   1 
   3 -16 -16   41.83    5.77   1 
   3 -16 -15   37.58    5.30   1 
   3 -16 -14    3.71    2.51   1 
   3 -16 -13   15.51    3.54   1 
   3 -16 -12   -1.02    1.77   1 
   3 -16 -11    1.08    1.80   1 
   3 -16 -10    6.73    2.43   1 
   3 -16  -9    6.92    2.34   1 
   3 -16  -8   38.53    4.01   1 
   3 -16  -7    4.58    1.94   1 
   3 -16  -6    2.19    1.53   1 
   3 -16  -5   34.92    3.41   1 
   3 -16  -4   37.60    3.36   1 
   3 -16  -3    7.47    1.82   1 
   3 -16  -2    6.79    1.71   1 
   3 -16  -1    9.16    1.78   1 
   3 -16   0    7.73    1.57   1 
   3 -16   1   13.21    1.90   1 
   3 -16   2    0.65    0.82   1 
   3 -15 -17    1.16    2.47   1 
   3 -15 -16    6.96    3.12   1 
   3 -15 -15    3.07    2.51   1 
   3 -15 -14    0.15    2.06   1 
   3 -15 -13    5.58    2.50   1 
   3 -15 -12   17.81    3.46   1 
   3 -15 -11    0.82    1.64   1 
   3 -15 -10  137.18    7.59   1 
   3 -15  -9    1.07    1.60   1 
   3 -15  -8   68.04    5.12   1 
   3 -15  -7    3.97    1.78   1 
   3 -15  -6   36.62    3.55   1 
   3 -15  -5    0.22    1.13   1 
   3 -15  -4   62.94    4.20   1 
   3 -15  -3    1.00    1.08   1 
   3 -15  -2  212.84    6.96   1 
   3 -15  -1    7.14    1.56   1 
   3 -15   0  101.21    4.41   1 
   3 -15   1    0.98    0.96   1 
   3 -15   2   40.58    2.54   1 
   3 -15   3   70.46    3.08   1 
   3 -15   4    8.95    1.26   1 
   3 -14 -18   33.94    5.41   1 
   3 -14 -17   13.25    3.63   1 
   3 -14 -16    0.52    2.16   1 
   3 -14 -15   18.49    3.82   1 
   3 -14 -14    0.76    1.91   1 
   3 -14 -13    2.84    1.96   1 
   3 -14 -12   53.17    5.04   1 
   3 -14 -11    0.51    1.58   1 
   3 -14 -10  126.00    7.16   1 
   3 -14  -9    2.08    1.61   1 
   3 -14  -8   42.36    4.00   1 
   3 -14  -7   21.84    3.05   1 
   3 -14  -6    2.73    1.40   1 
   3 -14  -5    0.81    1.20   1 
   3 -14  -4    6.19    1.63   1 
   3 -14  -3   14.78    2.19   1 
   3 -14  -2    9.73    1.76   1 
   3 -14  -1    3.14    1.20   1 
   3 -14   0    0.18    0.82   1 
   3 -14   1   91.57    3.86   1 
   3 -14   2   19.78    1.86   1 
   3 -14   3   94.88    3.41   1 
   3 -14   4   45.98    2.25   1 
   3 -14   5   29.83    1.66   1 
   3 -14   6    0.18    0.53   1 
   3 -13 -19    0.81    2.46   1 
   3 -13 -18    0.11    2.20   1 
   3 -13 -17    9.51    3.13   1 
   3 -13 -16    1.65    2.09   1 
   3 -13 -15   19.72    3.79   1 
   3 -13 -14    7.96    2.64   1 
   3 -13 -13    2.03    1.74   1 
   3 -13 -12   24.11    3.70   1 
   3 -13 -11    0.69    1.51   1 
   3 -13 -10    6.79    2.21   1 
   3 -13  -9    1.85    1.48   1 
   3 -13  -8    2.69    1.50   1 
   3 -13  -7   35.62    3.41   1 
   3 -13  -6   21.22    2.64   1 
   3 -13  -5   49.05    3.71   1 
   3 -13  -4  125.68    5.56   1 
   3 -13  -3   19.51    2.28   1 
   3 -13  -2  169.24    5.87   1 
   3 -13  -1   44.89    2.92   1 
   3 -13   0   54.42    3.04   1 
   3 -13   1  267.47    6.33   1 
   3 -13   2   25.63    1.96   1 
   3 -13   3  259.00    5.47   1 
   3 -13   4   12.23    1.26   1 
   3 -13   5   34.33    1.67   1 
   3 -13   6    7.07    0.86   1 
   3 -12 -20   32.32    5.38   1 
   3 -12 -19   -0.74    2.32   1 
   3 -12 -18   17.51    3.87   1 
   3 -12 -17    1.87    2.20   1 
   3 -12 -16    8.18    2.78   1 
   3 -12 -15    4.55    2.23   1 
   3 -12 -14   14.07    3.17   1 
   3 -12 -13   10.89    2.82   1 
   3 -12 -12  111.59    6.98   1 
   3 -12 -11    2.98    1.64   1 
   3 -12 -10  221.73    9.11   1 
   3 -12  -9    0.98    1.34   1 
   3 -12  -8   36.57    3.56   1 
   3 -12  -7    7.19    1.85   1 
   3 -12  -6    5.53    1.66   1 
   3 -12  -5   91.06    4.84   1 
   3 -12  -4   47.20    3.40   1 
   3 -12  -3  121.87    5.07   1 
   3 -12  -2  102.46    4.44   1 
   3 -12  -1   41.54    2.73   1 
   3 -12   0    0.95    0.72   1 
   3 -12   1   69.36    3.12   1 
   3 -12   2    4.07    0.94   1 
   3 -12   3   23.02    1.67   1 
   3 -12   4    2.78    0.74   1 
   3 -12   5    3.89    0.76   1 
   3 -12   6   57.82    1.84   1 
   3 -11 -21    6.66    3.37   1 
   3 -11 -20    0.23    2.42   1 
   3 -11 -19   -0.02    2.22   1 
   3 -11 -18    1.47    2.26   1 
   3 -11 -17    6.13    2.59   1 
   3 -11 -16   18.70    3.67   1 
   3 -11 -15    1.52    1.71   1 
   3 -11 -14   53.40    5.15   1 
   3 -11 -13    0.16    1.48   1 
   3 -11 -12   -1.13    1.30   1 
   3 -11 -11    2.81    1.61   1 
   3 -11 -10    0.19    1.13   1 
   3 -11  -9   49.35    4.14   1 
   3 -11  -8    0.13    0.99   1 
   3 -11  -7   37.94    3.37   1 
   3 -11  -6   65.95    4.17   1 
   3 -11  -5   12.25    2.00   1 
   3 -11  -4  155.14    5.83   1 
   3 -11  -3   80.30    3.98   1 
   3 -11  -2   18.65    1.92   1 
   3 -11  -1  297.04    7.01   1 
   3 -11   0   23.23    1.99   1 
   3 -11   1  510.75    8.37   1 
   3 -11   2  112.66    3.57   1 
   3 -11   3  447.68    6.92   1 
   3 -11   4   30.00    1.64   1 
   3 -11   5  229.79    4.10   1 
  -3  11  -7   94.07    2.39   1 
  -3  11  -8  250.57    3.85   1 
  -3  11 -10   11.25    1.05   1 
  -3  11 -11   81.42    2.54   1 
  -3  11 -12   53.39    2.26   1 
   3 -10 -21   10.09    3.44   1 
   3 -10 -20    4.35    2.60   1 
   3 -10 -19   12.65    3.58   1 
   3 -10 -18    0.44    1.89   1 
   3 -10 -17    1.36    1.90   1 
   3 -10 -16    1.23    1.84   1 
   3 -10 -15   54.86    5.31   1 
   3 -10 -14   14.05    3.03   1 
   3 -10 -13   -0.14    1.47   1 
   3 -10 -12    8.14    2.27   1 
   3 -10 -11   36.46    3.79   1 
   3 -10 -10    1.27    1.29   1 
   3 -10  -9    0.35    1.25   1 
   3 -10  -8   -0.12    0.97   1 
   3 -10  -7   93.48    5.01   1 
   3 -10  -6   13.86    2.12   1 
   3 -10  -5  143.20    5.69   1 
   3 -10  -4    0.21    0.74   1 
   3 -10  -3    1.34    0.83   1 
   3 -10  -2    0.91    0.81   1 
   3 -10  -1   32.05    2.25   1 
   3 -10   0   79.01    3.27   1 
   3 -10   1   19.68    1.66   1 
   3 -10   2   13.38    1.35   1 
   3 -10   3   -0.22    0.50   1 
   3 -10   4   25.05    1.46   1 
   3 -10   5   10.05    0.97   1 
   3 -10   6  173.37    3.35   1 
  -3  10  -7  159.20    3.33   1 
  -3  10  -8   89.60    2.49   1 
  -3  10  -9  155.36    3.42   1 
  -3  10 -10   34.19    1.83   1 
  -3  10 -11    4.50    0.95   1 
  -3  10 -12   57.92    2.59   1 
  -3  10 -13    3.27    1.00   1 
  -3  10 -14   99.54    3.71   1 
  -3  10 -15   29.72    2.28   1 
  -3  10 -16   91.48    3.92   1 
   3  -9 -22   15.11    4.07   1 
   3  -9 -21    3.15    2.64   1 
   3  -9 -20    3.37    2.59   1 
   3  -9 -19    4.41    2.47   1 
   3  -9 -18   18.03    3.75   1 
   3  -9 -17    1.87    1.94   1 
   3  -9 -16   59.10    5.53   1 
   3  -9 -15   20.03    3.47   1 
   3  -9 -14   94.16    6.45   1 
   3  -9 -13   15.72    2.92   1 
   3  -9 -12   20.56    3.15   1 
   3  -9 -11    1.75    1.33   1 
   3  -9 -10   23.70    3.08   1 
   3  -9  -9   18.93    2.71   1 
   3  -9  -8   51.68    3.86   1 
   3  -9  -7   14.96    2.21   1 
   3  -9  -6   41.62    3.17   1 
   3  -9  -5    9.33    1.66   1 
   3  -9  -4    1.08    0.81   1 
   3  -9  -3   11.98    1.68   1 
   3  -9  -2    5.10    1.15   1 
   3  -9  -1  206.86    5.45   1 
   3  -9   0   15.67    1.56   1 
   3  -9   1  145.43    4.01   1 
   3  -9   2  181.63    4.24   1 
   3  -9   3   41.94    1.92   1 
   3  -9   4   32.99    1.62   1 
   3  -9   5  251.96    4.34   1 
   3  -9   6  540.77    6.65   1 
  -3   9  -7   36.16    1.74   1 
  -3   9  -8  228.56    4.38   1 
  -3   9  -9   82.33    2.75   1 
  -3   9 -10    0.94    0.69   1 
  -3   9 -11    8.30    1.26   1 
  -3   9 -12    0.69    0.79   1 
  -3   9 -13    2.63    0.99   1 
  -3   9 -14    1.66    0.97   1 
  -3   9 -15    1.67    0.96   1 
  -3   9 -16    0.84    0.99   1 
  -3   9 -17   62.03    3.61   1 
  -3   9 -18   27.21    2.70   1 
  -3   9 -19   63.02    3.95   1 
   3  -8 -23   45.39    6.23   1 
   3  -8 -23   45.43    6.23   1 
   3  -8 -22   10.34    3.44   1 
   3  -8 -21   27.02    4.75   1 
   3  -8 -20    0.24    1.98   1 
   3  -8 -19    3.69    2.46   1 
   3  -8 -18    0.11    1.59   1 
   3  -8 -17    2.34    1.90   1 
   3  -8 -16    3.49    2.04   1 
   3  -8 -15    0.40    1.68   1 
   3  -8 -14   32.21    4.12   1 
   3  -8 -13   86.83    5.80   1 
   3  -8 -12   10.54    2.27   1 
   3  -8 -11   57.57    4.49   1 
   3  -8 -10   77.68    4.94   1 
   3  -8  -9    4.09    1.48   1 
   3  -8  -8   22.16    2.54   1 
   3  -8  -7    4.25    1.31   1 
   3  -8  -6   16.58    2.03   1 
   3  -8  -5   19.20    2.05   1 
   3  -8  -4    3.63    1.03   1 
   3  -8  -3   98.08    3.99   1 
   3  -8  -2   53.49    2.79   1 
   3  -8  -1  101.74    3.65   1 
   3  -8   0  296.62    6.00   1 
   3  -8   1   23.10    1.64   1 
   3  -8   2   47.67    2.13   1 
   3  -8   3   19.42    1.30   1 
   3  -8   4    1.86    0.59   1 
   3  -8   5  244.84    4.40   1 
  -3   8  -6   16.94    1.34   1 
  -3   8  -7  168.59    3.87   1 
  -3   8  -8    0.34    0.56   1 
  -3   8  -9   28.42    1.83   1 
  -3   8 -10    2.42    0.85   1 
  -3   8 -11    0.09    0.74   1 
  -3   8 -12   20.13    1.90   1 
  -3   8 -13   25.47    2.23   1 
  -3   8 -14   51.07    3.05   1 
  -3   8 -15   28.39    2.51   1 
  -3   8 -16  104.53    4.66   1 
  -3   8 -17    0.51    1.05   1 
  -3   8 -18   44.89    3.36   1 
  -3   8 -19    7.05    1.80   1 
  -3   8 -20   29.58    3.06   1 
  -3   8 -21    0.65    1.37   1 
  -3   8 -22   58.15    4.42   1 
   3  -7 -24   17.10    4.08   1 
   3  -7 -23   -0.33    2.34   1 
   3  -7 -22   10.11    3.34   1 
   3  -7 -21    2.64    2.32   1 
   3  -7 -20   39.63    5.33   1 
   3  -7 -19    0.03    1.76   1 
   3  -7 -18  188.73    9.79   1 
   3  -7 -17    0.59    1.64   1 
   3  -7 -16  164.54    8.66   1 
   3  -7 -15   28.16    3.91   1 
   3  -7 -14   90.07    6.04   1 
   3  -7 -13    5.34    1.92   1 
   3  -7 -12   89.07    5.58   1 
   3  -7 -11   83.03    5.18   1 
   3  -7 -10  354.56   10.27   1 
   3  -7  -9   32.40    3.07   1 
   3  -7  -8  155.65    6.18   1 
   3  -7  -7    0.84    0.93   1 
   3  -7  -6    0.66    0.74   1 
   3  -7  -5  125.29    4.84   1 
   3  -7  -4   74.42    3.54   1 
   3  -7  -3   59.25    3.01   1 
   3  -7  -2   19.14    1.70   1 
   3  -7  -1    0.06    0.49   1 
   3  -7   0  115.12    3.53   1 
   3  -7   1  156.80    3.94   1 
   3  -7   2   27.65    1.59   1 
   3  -7   3   14.46    1.17   1 
   3  -7   4   79.37    2.51   1 
   3  -7   5    5.69    0.83   1 
  -3   7  -6   28.18    1.70   1 
  -3   7  -7   42.49    2.11   1 
  -3   7  -8    3.28    0.85   1 
  -3   7  -9    5.05    1.05   1 
  -3   7 -10    0.18    0.66   1 
  -3   7 -11  167.53    5.05   1 
  -3   7 -12   14.38    1.75   1 
  -3   7 -13   49.23    3.07   1 
  -3   7 -14   23.07    2.31   1 
  -3   7 -15    4.02    1.35   1 
  -3   7 -16   11.57    1.98   1 
  -3   7 -17    0.47    1.07   1 
  -3   7 -18   54.32    3.82   1 
  -3   7 -19    4.52    1.62   1 
  -3   7 -20    0.05    1.25   1 
  -3   7 -21    8.26    2.10   1 
  -3   7 -22   17.14    2.83   1 
  -3   7 -23   -0.10    1.45   1 
   3  -6 -24   34.70    5.51   1 
   3  -6 -23   31.44    5.10   1 
   3  -6 -22   21.77    4.27   1 
   3  -6 -21    4.78    2.50   1 
   3  -6 -20   18.50    3.68   1 
   3  -6 -19    9.07    2.87   1 
   3  -6 -18   51.47    5.16   1 
   3  -6 -17    1.17    1.52   1 
   3  -6 -16   67.00    5.45   1 
   3  -6 -15   30.27    3.65   1 
   3  -6 -14    1.34    1.41   1 
   3  -6 -13   48.78    4.27   1 
   3  -6 -12  160.90    7.28   1 
   3  -6 -11    0.92    1.17   1 
   3  -6 -10    8.53    1.79   1 
   3  -6  -9    0.09    0.76   1 
   3  -6  -8   -0.11    0.67   1 
   3  -6  -7  162.83    5.90   1 
   3  -6  -6   18.78    2.01   1 
   3  -6  -5  320.21    7.54   1 
   3  -6  -4   94.71    3.82   1 
   3  -6  -3  224.96    5.62   1 
   3  -6  -2   92.19    3.41   1 
   3  -6  -1  191.66    4.65   1 
   3  -6   0   54.67    2.39   1 
   3  -6   1  106.31    3.12   1 
   3  -6   2    0.27    0.43   1 
   3  -6   3  539.37    7.18   1 
   3  -6   4   11.73    1.11   1 
   3  -6   5  278.65    4.97   1 
  -3   6  -6   14.55    1.35   1 
  -3   6  -7   59.03    2.57   1 
  -3   6  -8   13.75    1.48   1 
  -3   6  -9   77.47    3.20   1 
  -3   6 -10   41.38    2.55   1 
  -3   6 -11   48.10    2.89   1 
  -3   6 -12   15.05    1.96   1 
  -3   6 -13   43.60    3.04   1 
  -3   6 -14    0.70    0.97   1 
  -3   6 -15   12.25    1.92   1 
  -3   6 -16    0.52    1.12   1 
  -3   6 -17    2.04    1.26   1 
  -3   6 -18    1.78    1.33   1 
  -3   6 -19    0.13    1.16   1 
  -3   6 -20   42.62    3.84   1 
  -3   6 -21    1.39    1.45   1 
  -3   6 -22    3.43    1.78   1 
  -3   6 -23   -0.27    1.46   1 
  -3   6 -24    6.17    2.33   1 
  -3   6 -25    9.44    2.73   1 
   3  -5 -25   -0.04    2.50   1 
   3  -5 -24    1.35    2.35   1 
   3  -5 -23    6.47    2.84   1 
   3  -5 -22    2.20    2.35   1 
   3  -5 -21    5.45    2.51   1 
   3  -5 -20   87.65    6.92   1 
   3  -5 -19   17.19    3.49   1 
   3  -5 -18   61.50    5.40   1 
   3  -5 -17   24.97    3.71   1 
   3  -5 -16   18.88    3.23   1 
   3  -5 -15    9.90    2.32   1 
   3  -5 -14   77.97    5.39   1 
   3  -5 -13  118.03    6.28   1 
   3  -5 -12  398.02   11.17   1 
   3  -5 -11  165.57    6.85   1 
   3  -5 -10  194.03    7.10   1 
   3  -5  -9   88.82    4.64   1 
   3  -5  -8   85.04    4.32   1 
   3  -5  -7  189.73    6.16   1 
   3  -5  -6   32.64    2.48   1 
   3  -5  -5  305.29    7.06   1 
   3  -5  -4  160.06    4.81   1 
   3  -5  -3   29.76    2.02   1 
   3  -5  -2   28.12    1.87   1 
   3  -5  -1    2.38    0.69   1 
   3  -5   0   18.56    1.38   1 
   3  -5   1   79.26    2.66   1 
   3  -5   2    8.03    0.95   1 
   3  -5   3    1.60    0.57   1 
   3  -5   4  148.45    3.67   1 
  -3   5  -5    0.27    0.54   1 
  -3   5  -6  274.02    5.57   1 
  -3   5  -7    6.85    1.14   1 
  -3   5  -8  194.79    5.07   1 
  -3   5  -9   36.09    2.38   1 
  -3   5 -10   10.50    1.56   1 
  -3   5 -11   54.13    3.16   1 
  -3   5 -12    8.96    1.67   1 
  -3   5 -13   72.48    4.02   1 
  -3   5 -14    0.22    1.07   1 
  -3   5 -15   18.86    2.46   1 
  -3   5 -16  117.58    5.59   1 
  -3   5 -17   22.31    2.67   1 
  -3   5 -18   54.79    4.09   1 
  -3   5 -19   61.48    4.43   1 
  -3   5 -20   10.86    2.48   1 
  -3   5 -21   54.52    4.49   1 
  -3   5 -22   -0.97    1.45   1 
  -3   5 -23    0.09    1.56   1 
  -3   5 -24   23.06    3.71   1 
  -3   5 -25    1.37    2.14   1 
  -3   5 -26   21.53    3.91   1 
   3  -4 -26    4.61    2.95   1 
   3  -4 -25   20.46    4.36   1 
   3  -4 -24    0.40    2.28   1 
   3  -4 -23   -0.63    1.71   1 
   3  -4 -22   -0.27    1.89   1 
   3  -4 -21   19.91    3.84   1 
   3  -4 -20   49.39    5.14   1 
   3  -4 -19   16.58    3.40   1 
   3  -4 -18   56.53    5.12   1 
   3  -4 -17    0.51    1.39   1 
   3  -4 -16    5.77    1.94   1 
   3  -4 -15    2.32    1.47   1 
   3  -4 -14   12.35    2.43   1 
   3  -4 -13   11.74    2.18   1 
   3  -4 -12   52.15    3.92   1 
   3  -4 -11    0.49    0.92   1 
   3  -4 -10    4.87    1.36   1 
   3  -4  -9  101.65    4.80   1 
   3  -4  -8    4.90    1.27   1 
   3  -4  -7  526.05   10.11   1 
   3  -4  -6    4.02    1.05   1 
   3  -4  -5  429.29    8.23   1 
   3  -4  -4   42.20    2.44   1 
   3  -4  -3  230.18    5.37   1 
   3  -4  -2    0.37    0.47   1 
   3  -4  -1  219.82    4.79   1 
   3  -4   0    0.98    0.54   1 
   3  -4   1  804.69    9.36   1 
   3  -4   2   89.95    2.87   1 
   3  -4   3 1144.67   11.87   1 
   3  -4   4   70.60    2.58   1 
  -3   4  -5  231.70    5.15   1 
  -3   4  -6   58.94    2.71   1 
  -3   4  -7  123.79    4.02   1 
  -3   4  -8    1.42    0.77   1 
  -3   4  -9  134.03    4.58   1 
  -3   4 -10   30.18    2.39   1 
  -3   4 -11  379.21    8.65   1 
  -3   4 -12    5.50    1.47   1 
  -3   4 -13  136.47    5.61   1 
  -3   4 -14   13.83    2.26   1 
  -3   4 -15   21.17    2.64   1 
  -3   4 -16    4.46    1.60   1 
  -3   4 -17   25.37    2.99   1 
  -3   4 -18   47.05    3.95   1 
  -3   4 -19   36.42    3.66   1 
  -3   4 -20    2.95    1.67   1 
  -3   4 -21   31.67    3.73   1 
  -3   4 -22    2.58    1.86   1 
  -3   4 -23    1.13    1.85   1 
  -3   4 -24    9.92    2.89   1 
  -3   4 -25    6.24    2.54   1 
  -3   4 -26    2.01    2.08   1 
  -3   4 -27    1.87    2.45   1 
   3  -3 -26    0.21    2.10   1 
   3  -3 -25    2.50    2.49   1 
   3  -3 -24   -0.20    2.00   1 
   3  -3 -23    2.24    2.31   1 
   3  -3 -22   40.44    4.93   1 
   3  -3 -21    5.05    2.47   1 
   3  -3 -20    7.08    2.38   1 
   3  -3 -19    0.62    1.60   1 
   3  -3 -18    0.50    1.40   1 
   3  -3 -17   42.21    4.23   1 
   3  -3 -16    3.27    1.67   1 
   3  -3 -15   10.94    2.34   1 
   3  -3 -14   84.78    5.21   1 
   3  -3 -13   73.21    4.69   1 
   3  -3 -12  152.35    6.49   1 
   3  -3 -11    9.80    1.86   1 
   3  -3 -10   30.87    2.76   1 
   3  -3  -9  142.69    5.49   1 
   3  -3  -8  171.34    5.71   1 
   3  -3  -7  441.40    8.88   1 
   3  -3  -6    4.62    1.07   1 
   3  -3  -5  355.79    7.26   1 
   3  -3  -4   56.70    2.70   1 
   3  -3  -3    1.48    0.63   1 
   3  -3  -2   -0.02    0.41   1 
   3  -3  -1   72.05    2.64   1 
   3  -3   0   64.65    2.44   1 
   3  -3   1    2.40    0.67   1 
   3  -3   2   -0.02    0.44   1 
   3  -3   3   34.94    1.89   1 
  -3   3  -4  326.56    6.24   1 
  -3   3  -5   20.52    1.73   1 
  -3   3  -6  670.67    9.92   1 
  -3   3  -7    8.33    1.33   1 
  -3   3  -8   85.19    3.68   1 
  -3   3  -9   17.16    1.86   1 
  -3   3 -10   14.30    1.91   1 
  -3   3 -11   -0.18    0.83   1 
  -3   3 -12   -0.17    0.97   1 
  -3   3 -13   28.18    2.78   1 
  -3   3 -14  166.23    6.62   1 
  -3   3 -15    1.18    1.26   1 
  -3   3 -16  135.19    6.33   1 
  -3   3 -17  110.49    5.86   1 
  -3   3 -18   57.09    4.43   1 
  -3   3 -19   30.67    3.44   1 
  -3   3 -20   40.88    4.04   1 
  -3   3 -21    0.57    1.64   1 
  -3   3 -22   92.98    6.23   1 
  -3   3 -23    0.75    1.79   1 
  -3   3 -24   72.53    6.02   1 
  -3   3 -25   -0.25    1.95   1 
  -3   3 -26   27.22    4.27   1 
  -3   3 -27   13.16    3.65   1 
   3  -2 -27    2.21    2.80   1 
   3  -2 -26    1.48    2.41   1 
   3  -2 -25    1.94    2.25   1 
   3  -2 -24   21.16    4.14   1 
   3  -2 -23   34.57    4.88   1 
   3  -2 -22    2.03    2.02   1 
   3  -2 -21   48.80    5.01   1 
   3  -2 -20    3.24    2.00   1 
   3  -2 -19   -0.54    1.37   1 
   3  -2 -18    2.59    1.66   1 
   3  -2 -17    6.52    2.02   1 
   3  -2 -16    6.44    1.93   1 
   3  -2 -15   66.68    4.76   1 
   3  -2 -14   11.42    2.22   1 
   3  -2 -13  107.85    5.54   1 
   3  -2 -12   32.58    2.99   1 
   3  -2 -11   -0.15    0.75   1 
   3  -2 -10    3.45    1.10   1 
   3  -2  -9   76.49    3.89   1 
   3  -2  -8    1.05    0.70   1 
   3  -2  -7  238.88    6.26   1 
   3  -2  -6   50.43    2.74   1 
   3  -2  -5   30.35    2.03   1 
   3  -2  -4   38.04    2.14   1 
   3  -2  -3   85.15    3.11   1 
   3  -2  -2  179.27    4.34   1 
   3  -2  -1   98.75    3.10   1 
   3  -2   0   96.69    3.05   1 
   3  -2   1  131.21    3.60   1 
   3  -2   2  136.99    3.73   1 
   3  -2   3  132.69    3.72   1 
  -3   2  -4  119.31    3.86   1 
  -3   2  -5  129.10    4.14   1 
  -3   2  -6  137.78    4.46   1 
  -3   2  -7   54.92    2.96   1 
  -3   2  -8   78.53    3.66   1 
  -3   2  -9  119.58    4.71   1 
  -3   2 -10  136.89    5.29   1 
  -3   2 -11   40.32    3.13   1 
  -3   2 -12    5.98    1.63   1 
  -3   2 -13    2.30    1.27   1 
  -3   2 -14    1.86    1.29   1 
  -3   2 -15   42.86    3.65   1 
  -3   2 -16   65.48    4.59   1 
  -3   2 -17   82.93    5.27   1 
  -3   2 -18   29.15    3.36   1 
  -3   2 -19   44.96    4.19   1 
  -3   2 -20    3.68    1.88   1 
  -3   2 -21    2.27    1.76   1 
  -3   2 -22    1.48    1.83   1 
  -3   2 -23    0.27    1.77   1 
  -3   2 -24    1.07    2.09   1 
  -3   2 -25    0.78    2.06   1 
  -3   2 -26    0.34    2.32   1 
   3  -1 -28    1.07    2.77   1 
   3  -1 -27    5.45    3.01   1 
   3  -1 -26   12.42    3.51   1 
   3  -1 -25    0.42    2.10   1 
   3  -1 -24   48.10    5.37   1 
   3  -1 -23    0.28    1.89   1 
   3  -1 -22   24.46    4.00   1 
   3  -1 -21    2.62    1.79   1 
   3  -1 -20    2.13    1.73   1 
   3  -1 -19    6.88    2.18   1 
   3  -1 -18    6.62    2.01   1 
   3  -1 -17   35.49    3.75   1 
   3  -1 -16   33.01    3.47   1 
   3  -1 -15    4.36    1.58   1 
   3  -1 -14    0.07    0.95   1 
   3  -1 -13    4.38    1.43   1 
   3  -1 -12    9.95    1.76   1 
   3  -1 -11    7.49    1.53   1 
   3  -1 -10   82.71    4.07   1 
   3  -1  -9    6.36    1.29   1 
   3  -1  -8   39.37    2.57   1 
   3  -1  -7  342.24    7.35   1 
   3  -1  -6    5.07    0.98   1 
   3  -1  -5  141.55    4.17   1 
   3  -1  -4    1.63    0.63   1 
   3  -1  -3   52.24    2.39   1 
   3  -1  -2  283.08    5.46   1 
   3  -1   0  303.29    5.65   1 
   3  -1   1   23.73    1.61   1 
   3  -1   2    0.08    0.46   1 
  -3   1  -3   40.65    2.30   1 
  -3   1  -4   90.56    3.48   1 
  -3   1  -5   19.31    1.80   1 
  -3   1  -6    4.35    1.04   1 
  -3   1  -7  144.79    4.95   1 
  -3   1  -8    0.49    0.79   1 
  -3   1  -9   63.18    3.57   1 
  -3   1 -10    3.29    1.27   1 
  -3   1 -11   55.56    3.71   1 
  -3   1 -12   24.36    2.61   1 
  -3   1 -13   34.83    3.19   1 
  -3   1 -14   71.04    4.68   1 
  -3   1 -15    5.42    1.85   1 
  -3   1 -16    5.02    1.86   1 
  -3   1 -17   28.73    3.34   1 
  -3   1 -18   22.65    3.32   1 
  -3   1 -19    2.48    1.69   1 
  -3   1 -20   39.61    4.17   1 
  -3   1 -21    4.54    2.08   1 
  -3   1 -22  125.85    7.58   1 
  -3   1 -23    3.22    2.27   1 
  -3   1 -24   65.79    5.96   1 
  -3   1 -25    2.10    2.27   1 
  -3   1 -26   18.81    4.01   1 
   3   0 -28    4.29    2.90   1 
   3   0 -27    1.03    2.41   1 
   3   0 -26   12.35    3.40   1 
   3   0 -25   13.35    3.41   1 
   3   0 -24    8.41    2.74   1 
   3   0 -23   20.97    3.77   1 
   3   0 -22    0.68    1.73   1 
   3   0 -21   22.87    3.66   1 
   3   0 -20    1.10    1.47   1 
   3   0 -19   26.70    3.65   1 
   3   0 -18   54.87    4.56   1 
   3   0 -17    0.44    1.13   1 
   3   0 -16   73.02    4.85   1 
   3   0 -15    6.67    1.77   1 
   3   0 -14   37.51    3.27   1 
   3   0 -13   60.35    3.84   1 
   3   0 -12    3.16    1.15   1 
   3   0 -11  136.01    5.29   1 
   3   0 -10    3.09    1.02   1 
   3   0  -9    6.86    1.26   1 
   3   0  -8  564.25    9.70   1 
   3   0  -7   24.43    1.91   1 
   3   0  -6  174.23    4.72   1 
   3   0  -4  465.89    7.54   1 
   3   0  -3  232.10    4.97   1 
   3   0  -2   99.41    3.16   1 
   3   0  -1  250.65    5.09   1 
   3   0   0    0.54    0.52   1 
   3   0   1    7.49    1.07   1 
   3   0   2    0.21    0.44   1 
  -3   0  -3   28.57    2.04   1 
  -3   0  -4   35.17    2.33   1 
  -3   0  -5    0.41    0.69   1 
  -3   0  -6   73.29    3.50   1 
  -3   0  -7    0.37    0.69   1 
  -3   0  -9   26.23    2.49   1 
  -3   0 -10   13.27    2.08   1 
  -3   0 -11   23.44    2.56   1 
  -3   0 -12   40.93    3.47   1 
  -3   0 -13   31.46    3.17   1 
  -3   0 -14   75.62    4.85   1 
  -3   0 -15    2.19    1.48   1 
  -3   0 -16   59.95    4.67   1 
  -3   0 -17    9.92    2.36   1 
  -3   0 -18   11.49    2.62   1 
  -3   0 -19   14.77    2.90   1 
  -3   0 -20    7.07    2.41   1 
  -3   0 -21    6.88    2.47   1 
  -3   0 -22   25.67    3.99   1 
  -3   0 -23   -0.62    1.83   1 
  -3   0 -24   31.23    4.64   1 
  -3   0 -25   -0.82    2.28   1 
   3   1 -28   45.84    5.55   1 
   3   1 -27    1.93    2.40   1 
   3   1 -26  106.34    7.85   1 
   3   1 -25    2.03    2.19   1 
   3   1 -24   68.78    6.03   1 
   3   1 -23   -0.29    1.62   1 
   3   1 -22   49.96    4.84   1 
   3   1 -21   10.47    2.55   1 
   3   1 -20   45.44    4.35   1 
   3   1 -19  111.20    6.47   1 
   3   1 -18  123.87    6.54   1 
   3   1 -17   82.62    5.15   1 
   3   1 -16   21.94    2.86   1 
   3   1 -15   11.17    2.00   1 
   3   1 -14   -0.24    0.78   1 
   3   1 -13   45.62    3.29   1 
   3   1 -12   13.43    1.87   1 
   3   1 -11    9.04    1.56   1 
   3   1 -10    8.02    1.37   1 
   3   1  -9  120.20    4.37   1 
   3   1  -8   54.15    2.80   1 
   3   1  -7    7.00    1.11   1 
   3   1  -6   18.91    1.61   1 
   3   1  -5   17.72    1.50   1 
   3   1  -4   91.52    3.16   1 
   3   1  -3   73.60    2.75   1 
   3   1  -2   47.19    2.24   1 
   3   1  -1   19.85    1.52   1 
   3   1   0   12.82    1.27   1 
   3   1   1   27.90    1.84   1 
  -3  -1  -2   32.58    2.17   1 
  -3  -1  -3   88.83    3.55   1 
  -3  -1  -4    1.73    0.89   1 
  -3  -1  -5  397.53    8.16   1 
  -3  -1  -6    9.98    1.54   1 
  -3  -1  -7    4.35    1.20   1 
  -3  -1  -8    5.28    1.37   1 
  -3  -1  -9   15.72    2.15   1 
  -3  -1 -10    7.00    1.69   1 
  -3  -1 -11   48.36    3.70   1 
  -3  -1 -12   23.51    2.85   1 
  -3  -1 -13    2.98    1.42   1 
  -3  -1 -14   -0.59    1.20   1 
  -3  -1 -15   32.43    3.46   1 
  -3  -1 -16    5.91    2.03   1 
  -3  -1 -17    4.69    1.76   1 
  -3  -1 -18    1.89    1.67   1 
  -3  -1 -19   63.51    5.21   1 
  -3  -1 -20   40.87    4.44   1 
  -3  -1 -21    7.31    2.53   1 
  -3  -1 -22   28.05    4.20   1 
  -3  -1 -23   -0.72    2.00   1 
  -3  -1 -24    0.12    2.15   1 
  -3  -1 -25   12.58    3.50   1 
   3   2 -29    1.65    2.61   1 
   3   2 -28    2.49    2.40   1 
   3   2 -27    7.93    2.87   1 
   3   2 -26    2.63    2.15   1 
   3   2 -25   18.81    3.66   1 
   3   2 -24    5.33    2.31   1 
   3   2 -23    6.85    2.35   1 
   3   2 -22    5.27    2.11   1 
   3   2 -21   65.33    5.18   1 
   3   2 -20   17.57    2.94   1 
   3   2 -19   95.74    5.81   1 
   3   2 -18   26.27    3.02   1 
   3   2 -17    6.03    1.69   1 
   3   2 -16    0.40    0.95   1 
   3   2 -15   81.56    4.59   1 
   3   2 -14    1.35    0.98   1 
   3   2 -13  182.62    6.25   1 
   3   2 -12    2.76    1.04   1 
   3   2 -11  293.77    7.32   1 
   3   2 -10   83.41    3.70   1 
   3   2  -9   86.94    3.63   1 
   3   2  -8   93.41    3.57   1 
   3   2  -7   59.74    2.77   1 
   3   2  -6  203.64    4.96   1 
   3   2  -5  221.79    5.05   1 
   3   2  -4   22.44    1.59   1 
   3   2  -3  442.39    7.16   1 
   3   2  -2    6.11    0.94   1 
   3   2  -1   20.71    1.59   1 
   3   2   0   17.55    1.49   1 
  -3  -2  -1    1.17    0.73   1 
  -3  -2  -2    1.26    0.71   1 
  -3  -2  -3   26.60    2.15   1 
  -3  -2  -4   68.12    3.38   1 
  -3  -2  -5   48.31    2.93   1 
  -3  -2  -6   17.87    2.05   1 
  -3  -2  -7   46.46    3.15   1 
  -3  -2  -8    0.33    0.81   1 
  -3  -2  -9    9.20    1.87   1 
  -3  -2 -10    6.56    1.66   1 
  -3  -2 -11   59.89    4.16   1 
  -3  -2 -12   77.64    4.94   1 
  -3  -2 -13    3.90    1.73   1 
  -3  -2 -14   26.00    3.12   1 
  -3  -2 -15   16.90    2.87   1 
  -3  -2 -16    2.52    1.65   1 
  -3  -2 -17   33.64    3.79   1 
  -3  -2 -18    1.24    1.65   1 
  -3  -2 -19   22.93    3.57   1 
  -3  -2 -20    4.92    2.33   1 
  -3  -2 -21    5.88    2.44   1 
  -3  -2 -22   19.20    3.74   1 
  -3  -2 -23   -0.14    2.06   1 
  -3  -2 -24   -0.06    2.18   1 
   3   3 -29   18.03    4.23   1 
   3   3 -28   38.95    5.32   1 
   3   3 -27    7.19    2.80   1 
   3   3 -26   26.50    4.22   1 
   3   3 -25   35.07    4.54   1 
   3   3 -24    1.96    1.90   1 
   3   3 -23   58.46    5.12   1 
   3   3 -22   29.27    3.85   1 
   3   3 -21  252.70    9.74   1 
   3   3 -20   24.18    3.29   1 
   3   3 -19  288.04    9.73   1 
   3   3 -18  176.42    7.31   1 
   3   3 -17   53.87    3.95   1 
   3   3 -16    2.07    1.16   1 
   3   3 -15   22.48    2.44   1 
   3   3 -14   83.64    4.31   1 
   3   3 -13  170.09    5.81   1 
   3   3 -12   15.01    1.92   1 
   3   3 -11  139.87    4.85   1 
   3   3 -10  199.08    5.60   1 
   3   3  -9    0.06    0.56   1 
   3   3  -8   92.45    3.53   1 
   3   3  -7   38.62    2.22   1 
   3   3  -6    9.42    1.22   1 
   3   3  -5    5.08    0.91   1 
   3   3  -4  277.04    5.66   1 
   3   3  -3   35.70    2.03   1 
   3   3  -2  108.34    3.56   1 
   3   3  -1   75.73    3.03   1 
   3   3   0   54.25    2.62   1 
  -3  -3  -1   18.14    1.72   1 
  -3  -3  -2    6.67    1.21   1 
  -3  -3  -3  248.44    6.45   1 
  -3  -3  -4    0.06    0.70   1 
  -3  -3  -5  202.44    6.24   1 
  -3  -3  -6   37.01    2.84   1 
  -3  -3  -7   16.48    2.21   1 
  -3  -3  -8   82.37    4.45   1 
  -3  -3  -9    1.88    1.17   1 
  -3  -3 -10  119.10    5.78   1 
  -3  -3 -11   30.99    3.24   1 
  -3  -3 -12   50.23    4.10   1 
  -3  -3 -13   66.41    4.86   1 
  -3  -3 -14    0.71    1.40   1 
  -3  -3 -15    1.07    1.44   1 
  -3  -3 -16    0.21    1.37   1 
  -3  -3 -17    7.11    2.36   1 
  -3  -3 -18    2.21    1.77   1 
  -3  -3 -19   -0.53    1.32   1 
  -3  -3 -20   16.81    3.37   1 
  -3  -3 -21   13.80    3.32   1 
  -3  -3 -22    0.29    2.12   1 
  -3  -3 -23    2.02    2.33   1 
  -3  -3 -24   -0.84    2.33   1 
   3   4 -30    0.95    2.33   1 
   3   4 -29   11.27    3.53   1 
   3   4 -28    2.92    2.41   1 
   3   4 -27   14.74    3.57   1 
   3   4 -26   26.07    4.08   1 
   3   4 -25    3.60    2.14   1 
   3   4 -24   39.55    4.28   1 
   3   4 -23    1.92    1.55   1 
   3   4 -22    0.62    1.36   1 
   3   4 -21   15.41    2.73   1 
   3   4 -20   25.65    3.07   1 
   3   4 -19   21.66    2.93   1 
   3   4 -18    3.41    1.44   1 
   3   4 -17   16.85    2.40   1 
   3   4 -16  111.32    5.19   1 
   3   4 -15  174.05    6.13   1 
   3   4 -14  128.32    5.21   1 
   3   4 -13  441.84    9.26   1 
   3   4 -12    2.03    0.89   1 
   3   4 -11  247.68    6.36   1 
   3   4 -10   25.25    1.99   1 
   3   4  -9   85.19    3.48   1 
   3   4  -8  156.07    4.49   1 
   3   4  -7  170.31    4.56   1 
   3   4  -6  493.24    7.87   1 
   3   4  -5  655.33    9.19   1 
   3   4  -4  278.32    5.77   1 
   3   4  -3  294.21    5.96   1 
   3   4  -2    0.04    0.50   1 
   3   4  -1  204.76    5.09   1 
  -3  -4   0   21.33    1.93   1 
  -3  -4  -1  288.67    6.71   1 
  -3  -4  -2  254.39    6.58   1 
  -3  -4  -3  207.79    6.03   1 
  -3  -4  -4   44.07    2.93   1 
  -3  -4  -5  108.61    4.72   1 
  -3  -4  -6    4.11    1.34   1 
  -3  -4  -7   83.21    4.41   1 
  -3  -4  -8    7.73    1.78   1 
  -3  -4  -9    2.52    1.44   1 
  -3  -4 -10   88.84    5.18   1 
  -3  -4 -11    5.98    1.88   1 
  -3  -4 -12   40.79    3.76   1 
  -3  -4 -13    2.19    1.50   1 
  -3  -4 -14    6.11    1.99   1 
  -3  -4 -15    1.43    1.58   1 
  -3  -4 -16   69.93    5.41   1 
  -3  -4 -17   11.89    2.89   1 
  -3  -4 -18    8.36    2.47   1 
  -3  -4 -19   11.08    2.77   1 
  -3  -4 -20    6.61    2.63   1 
  -3  -4 -21    4.28    2.58   1 
  -3  -4 -22    1.13    2.31   1 
  -3  -4 -23   17.04    3.96   1 
   3   5 -30   24.28    4.47   1 
   3   5 -29    5.37    2.74   1 
   3   5 -28   10.14    2.92   1 
   3   5 -27   10.96    2.96   1 
   3   5 -26    0.89    1.80   1 
   3   5 -25   17.51    3.19   1 
   3   5 -24    0.01    1.52   1 
   3   5 -23   63.53    5.03   1 
   3   5 -22    1.39    1.42   1 
   3   5 -21  147.72    6.99   1 
   3   5 -20   33.49    3.32   1 
   3   5 -19   72.85    4.60   1 
   3   5 -18   12.28    2.07   1 
   3   5 -17   18.88    2.29   1 
   3   5 -16    5.55    1.44   1 
   3   5 -15   93.40    4.44   1 
   3   5 -14    3.75    1.13   1 
   3   5 -13  190.65    5.85   1 
   3   5 -12   36.36    2.48   1 
   3   5 -11  305.36    6.88   1 
   3   5 -10    1.00    0.69   1 
   3   5  -9   29.06    2.04   1 
   3   5  -8   20.82    1.72   1 
   3   5  -7    4.28    0.89   1 
   3   5  -6  109.86    3.58   1 
   3   5  -5   39.40    2.17   1 
   3   5  -4  210.89    5.05   1 
   3   5  -3  249.21    5.61   1 
   3   5  -2  556.33    8.70   1 
  -3  -5   1   50.01    2.79   1 
  -3  -5   0  375.68    7.78   1 
  -3  -5  -1  135.40    4.75   1 
  -3  -5  -2    3.74    1.16   1 
  -3  -5  -3   22.58    2.20   1 
  -3  -5  -4    0.47    0.75   1 
  -3  -5  -5   22.69    2.32   1 
  -3  -5  -6  104.65    4.90   1 
  -3  -5  -7    3.44    1.32   1 
  -3  -5  -8  447.93   11.08   1 
  -3  -5  -9   32.30    3.29   1 
  -3  -5 -10  318.44    9.94   1 
  -3  -5 -11   52.92    4.27   1 
  -3  -5 -12  100.43    5.97   1 
  -3  -5 -13    0.22    1.32   1 
  -3  -5 -14   68.26    5.17   1 
  -3  -5 -15   14.71    2.94   1 
  -3  -5 -16   84.03    5.96   1 
  -3  -5 -17    1.07    1.72   1 
  -3  -5 -18   67.89    5.70   1 
  -3  -5 -19    1.48    2.04   1 
  -3  -5 -20   11.57    3.01   1 
  -3  -5 -21   -0.30    2.11   1 
  -3  -5 -22    4.21    2.78   1 
  -3  -5 -23   27.23    4.81   1 
   3   6 -30   15.08    3.62   1 
   3   6 -29   18.60    3.76   1 
   3   6 -28    0.21    2.02   1 
   3   6 -27   -0.27    1.79   1 
   3   6 -26   -0.29    1.55   1 
   3   6 -25    3.48    1.84   1 
   3   6 -24   14.71    2.77   1 
   3   6 -23    0.08    1.25   1 
   3   6 -22   62.28    4.61   1 
   3   6 -21   -0.17    1.17   1 
   3   6 -20   23.04    2.83   1 
   3   6 -19    0.36    1.01   1 
   3   6 -18   51.51    3.66   1 
   3   6 -17   96.93    4.77   1 
   3   6 -16   17.00    2.21   1 
   3   6 -15  185.58    6.10   1 
   3   6 -14    0.47    0.75   1 
   3   6 -13   21.95    2.06   1 
   3   6 -12   11.25    1.53   1 
   3   6 -11   -0.01    0.59   1 
   3   6 -10  275.58    6.22   1 
   3   6  -9   36.40    2.23   1 
   3   6  -8  329.84    6.49   1 
   3   6  -7  173.84    4.61   1 
   3   6  -6  211.88    5.07   1 
   3   6  -5  171.75    4.61   1 
   3   6  -4  160.16    4.47   1 
   3   6  -3  168.56    4.67   1 
  -3  -6   2  149.74    4.72   1 
  -3  -6   1   34.66    2.41   1 
  -3  -6   0  131.87    4.70   1 
  -3  -6  -1  202.60    5.97   1 
  -3  -6  -2  105.02    4.45   1 
  -3  -6  -3  120.53    4.94   1 
  -3  -6  -4   23.25    2.40   1 
  -3  -6  -5   63.30    3.85   1 
  -3  -6  -6   25.30    2.68   1 
  -3  -6  -7   58.96    4.02   1 
  -3  -6  -8  165.54    6.89   1 
  -3  -6  -9   11.50    2.24   1 
  -3  -6 -10   66.24    4.78   1 
  -3  -6 -11   60.84    4.66   1 
  -3  -6 -12    0.49    1.45   1 
  -3  -6 -13   13.64    2.62   1 
  -3  -6 -14    5.10    2.20   1 
  -3  -6 -15    0.84    1.67   1 
  -3  -6 -16    2.47    1.76   1 
  -3  -6 -17   -0.01    1.51   1 
  -3  -6 -18    0.97    1.85   1 
  -3  -6 -19   15.17    3.45   1 
  -3  -6 -20   17.26    3.77   1 
  -3  -6 -21   16.30    3.75   1 
  -3  -6 -22   32.70    5.06   1 
   3   7 -29   -0.18    1.97   1 
   3   7 -28    1.45    2.13   1 
   3   7 -27    0.86    1.90   1 
   3   7 -26   -0.48    1.62   1 
   3   7 -25    3.67    1.86   1 
   3   7 -24    0.22    1.42   1 
   3   7 -23    7.19    2.12   1 
   3   7 -22   -0.51    1.18   1 
   3   7 -21   11.87    2.21   1 
   3   7 -20    1.34    1.10   1 
   3   7 -19    8.02    1.77   1 
   3   7 -18    1.05    0.96   1 
   3   7 -17    1.49    1.02   1 
   3   7 -16   29.24    2.56   1 
   3   7 -15   67.56    3.61   1 
   3   7 -14    0.21    0.71   1 
   3   7 -13   55.23    3.10   1 
   3   7 -12   13.31    1.52   1 
   3   7 -11    3.44    0.97   1 
   3   7 -10  183.96    4.99   1 
   3   7  -9   39.59    2.25   1 
   3   7  -8  103.33    3.59   1 
   3   7  -7    3.65    0.90   1 
   3   7  -6    0.13    0.57   1 
   3   7  -5  228.42    5.41   1 
   3   7  -4   49.09    2.56   1 
  -3  -7   3   -0.32    0.68   1 
  -3  -7   2  314.25    7.11   1 
  -3  -7   1    1.79    0.93   1 
  -3  -7   0    2.73    1.03   1 
  -3  -7  -1   -0.06    0.67   1 
  -3  -7  -2    0.66    0.86   1 
  -3  -7  -3  214.41    6.75   1 
  -3  -7  -4   42.24    3.17   1 
  -3  -7  -5   37.93    3.16   1 
  -3  -7  -6  300.52    8.90   1 
  -3  -7  -7    2.07    1.32   1 
  -3  -7  -8  156.17    6.94   1 
  -3  -7  -9   14.76    2.55   1 
  -3  -7 -10  130.72    6.67   1 
  -3  -7 -11   12.92    2.61   1 
  -3  -7 -12   71.92    5.25   1 
  -3  -7 -13   83.76    5.83   1 
  -3  -7 -14  163.74    8.26   1 
  -3  -7 -15   31.62    3.85   1 
  -3  -7 -16  127.03    7.59   1 
  -3  -7 -17    4.40    2.11   1 
  -3  -7 -18   38.45    4.95   1 
  -3  -7 -19   17.09    3.65   1 
  -3  -7 -20    8.54    3.13   1 
  -3  -7 -21   14.50    3.79   1 
   3   8 -28    0.26    1.91   1 
   3   8 -27   46.28    4.67   1 
   3   8 -26    8.24    2.37   1 
   3   8 -25   16.74    2.93   1 
   3   8 -24  102.11    6.01   1 
   3   8 -23    5.13    1.84   1 
   3   8 -22   20.49    2.82   1 
   3   8 -21   25.47    2.88   1 
   3   8 -20    1.58    1.26   1 
   3   8 -19   21.06    2.43   1 
   3   8 -18    3.29    1.26   1 
   3   8 -17   56.03    3.46   1 
   3   8 -16   38.74    2.84   1 
   3   8 -15   32.78    2.56   1 
   3   8 -14   24.25    2.10   1 
   3   8 -13    9.29    1.43   1 
   3   8 -12   17.10    1.67   1 
   3   8 -11   58.51    2.87   1 
   3   8 -10   97.76    3.60   1 
   3   8  -9   41.09    2.30   1 
   3   8  -8   69.78    2.98   1 
   3   8  -7    5.03    1.03   1 
   3   8  -6    7.78    1.19   1 
   3   8  -5   63.82    2.90   1 
  -3  -8   4    1.51    0.86   1 
  -3  -8   3   16.39    1.81   1 
  -3  -8   2  121.33    4.52   1 
  -3  -8   1    6.01    1.32   1 
  -3  -8   0  277.28    7.17   1 
  -3  -8  -1   57.67    3.45   1 
  -3  -8  -2   62.50    3.72   1 
  -3  -8  -3   12.36    1.99   1 
  -3  -8  -4   83.81    4.52   1 
  -3  -8  -5    2.53    1.26   1 
  -3  -8  -6  132.16    6.13   1 
  -3  -8  -7   -0.09    1.13   1 
  -3  -8  -8   48.42    4.07   1 
  -3  -8  -9   28.10    3.24   1 
  -3  -8 -10    1.59    1.41   1 
  -3  -8 -11    8.79    2.40   1 
  -3  -8 -12    0.38    1.37   1 
  -3  -8 -13    0.81    1.60   1 
  -3  -8 -14    8.86    2.55   1 
  -3  -8 -15    0.87    1.71   1 
  -3  -8 -16   16.28    3.31   1 
  -3  -8 -17   12.06    2.93   1 
  -3  -8 -18    0.45    1.99   1 
  -3  -8 -19   11.53    3.32   1 
  -3  -8 -20   23.18    4.35   1 
   3   9 -26    9.74    2.62   1 
   3   9 -25   18.19    2.94   1 
   3   9 -24   16.80    2.77   1 
   3   9 -23    0.20    1.26   1 
   3   9 -22   14.96    2.41   1 
   3   9 -21   96.43    5.16   1 
   3   9 -20   -0.29    1.04   1 
   3   9 -19   42.98    3.25   1 
   3   9 -18    6.30    1.54   1 
   3   9 -17    0.66    0.94   1 
   3   9 -16    6.27    1.40   1 
   3   9 -15    5.21    1.22   1 
   3   9 -14   32.83    2.40   1 
   3   9 -13   66.94    3.23   1 
   3   9 -12    2.18    0.86   1 
   3   9 -11  154.50    4.55   1 
   3   9 -10  147.36    4.39   1 
   3   9  -9   24.87    1.87   1 
   3   9  -8   11.91    1.35   1 
   3   9  -7   24.82    1.86   1 
   3   9  -6   11.58    1.46   1 
  -3  -9   5   72.05    3.42   1 
  -3  -9   4  167.68    5.18   1 
  -3  -9   3  184.76    5.58   1 
  -3  -9   2   61.84    3.39   1 
  -3  -9   1  137.55    5.04   1 
  -3  -9   0   -0.06    0.74   1 
  -3  -9  -1   11.26    1.87   1 
  -3  -9  -2    5.53    1.51   1 
  -3  -9  -3   68.72    4.07   1 
  -3  -9  -4   85.93    4.79   1 
  -3  -9  -5    1.49    1.18   1 
  -3  -9  -6   10.62    2.14   1 
  -3  -9  -7   36.73    3.59   1 
  -3  -9  -8   63.35    4.67   1 
  -3  -9  -9    2.25    1.45   1 
  -3  -9 -10   21.77    3.31   1 
  -3  -9 -11   48.44    4.46   1 
  -3  -9 -12   71.27    5.54   1 
  -3  -9 -13   47.70    4.62   1 
  -3  -9 -14   72.01    5.76   1 
  -3  -9 -15    9.53    2.70   1 
  -3  -9 -16   29.28    4.32   1 
  -3  -9 -17   16.64    3.68   1 
  -3  -9 -18    1.09    2.17   1 
  -3  -9 -19   37.16    5.24   1 
  -3  -9 -20    2.67    2.63   1 
   3  10 -25   55.08    4.57   1 
   3  10 -24    2.27    1.69   1 
   3  10 -23   38.87    3.59   1 
   3  10 -22    6.84    1.83   1 
   3  10 -21   74.11    4.42   1 
   3  10 -20   -0.15    0.98   1 
   3  10 -19  133.00    5.48   1 
   3  10 -18   66.33    3.82   1 
   3  10 -17  173.85    5.87   1 
   3  10 -16   82.64    3.91   1 
   3  10 -15  153.55    5.08   1 
   3  10 -14    6.44    1.29   1 
   3  10 -13   71.17    3.26   1 
   3  10 -12   26.50    2.00   1 
   3  10 -11  192.52    5.08   1 
   3  10 -10   24.37    1.88   1 
   3  10  -9  108.21    3.72   1 
   3  10  -8  126.68    4.06   1 
   3  10  -7    0.27    0.66   1 
  -3 -10   6   15.70    1.74   1 
  -3 -10   5   20.37    1.97   1 
  -3 -10   4   85.05    3.80   1 
  -3 -10   3   58.22    3.29   1 
  -3 -10   2   19.31    2.05   1 
  -3 -10   1   18.19    2.06   1 
  -3 -10   0   -0.03    0.84   1 
  -3 -10  -1    2.74    1.20   1 
  -3 -10  -2    2.26    1.14   1 
  -3 -10  -3  132.89    5.86   1 
  -3 -10  -4   28.65    2.97   1 
  -3 -10  -5   14.07    2.43   1 
  -3 -10  -6    2.40    1.56   1 
  -3 -10  -7    0.90    1.32   1 
  -3 -10  -8   17.65    2.88   1 
  -3 -10  -9    0.00    1.31   1 
  -3 -10 -10   48.69    4.48   1 
  -3 -10 -11    3.60    1.91   1 
  -3 -10 -12   -0.80    1.43   1 
  -3 -10 -13    7.73    2.43   1 
  -3 -10 -14   19.21    3.49   1 
  -3 -10 -15    0.55    1.80   1 
  -3 -10 -16    2.35    2.24   1 
  -3 -10 -17   12.12    3.19   1 
  -3 -10 -18   15.02    3.66   1 
  -3 -10 -19    2.25    2.51   1 
   3  11 -22   -0.33    1.09   1 
   3  11 -21    5.61    1.71   1 
   3  11 -20    1.03    1.10   1 
   3  11 -19    3.67    1.33   1 
   3  11 -18   42.65    3.06   1 
   3  11 -17    3.93    1.24   1 
   3  11 -16  115.42    4.48   1 
   3  11 -15   39.89    2.60   1 
   3  11 -14  123.91    4.32   1 
   3  11 -13   99.21    3.79   1 
   3  11 -12    9.81    1.39   1 
   3  11 -11   -0.25    0.61   1 
   3  11 -10    0.26    0.68   1 
   3  11  -9   29.55    2.01   1 
   3  11  -8  118.11    3.93   1 
  -3 -11   7   41.88    2.65   1 
  -3 -11   6  194.43    5.63   1 
  -3 -11   5  402.60    8.36   1 
  -3 -11   4    9.44    1.59   1 
  -3 -11   3  291.80    7.37   1 
  -3 -11   2   77.20    3.97   1 
  -3 -11   1   87.23    4.33   1 
  -3 -11   0   71.87    4.08   1 
  -3 -11  -1   19.20    2.44   1 
  -3 -11  -2  165.09    6.50   1 
  -3 -11  -3    2.79    1.41   1 
  -3 -11  -4   69.26    4.59   1 
  -3 -11  -5   91.68    5.43   1 
  -3 -11  -6   31.17    3.43   1 
  -3 -11  -7    0.47    1.40   1 
  -3 -11  -8    1.20    1.46   1 
  -3 -11  -9    3.48    1.85   1 
  -3 -11 -10    9.14    2.54   1 
  -3 -11 -11    7.47    2.48   1 
  -3 -11 -12   30.73    4.12   1 
  -3 -11 -13    1.46    1.80   1 
  -3 -11 -14   12.56    3.04   1 
  -3 -11 -15    1.95    1.93   1 
  -3 -11 -16    0.49    2.08   1 
  -3 -11 -17   19.13    3.99   1 
  -3 -11 -18    2.69    2.51   1 
   3  12 -20    3.93    1.45   1 
   3  12 -19   90.05    4.37   1 
   3  12 -18    4.31    1.39   1 
   3  12 -17   94.62    4.14   1 
   3  12 -16    8.94    1.55   1 
   3  12 -15   76.96    3.43   1 
   3  12 -14    8.99    1.42   1 
   3  12 -13  151.12    4.55   1 
   3  12 -12   -0.06    0.69   1 
   3  12 -11  167.93    4.66   1 
   3  12 -10   21.60    1.83   1 
   3  12  -9   51.72    2.67   1 
  -3 -12   8    8.08    1.50   1 
  -3 -12   7  102.40    4.09   1 
  -3 -12   6   53.52    3.16   1 
  -3 -12   5   42.61    2.87   1 
  -3 -12   4    1.33    0.99   1 
  -3 -12   3   58.90    3.51   1 
  -3 -12   2    2.05    1.13   1 
  -3 -12   1   12.42    1.97   1 
  -3 -12   0    7.54    1.70   1 
  -3 -12  -1    0.49    1.03   1 
  -3 -12  -2    0.50    1.10   1 
  -3 -12  -3    1.83    1.33   1 
  -3 -12  -4    5.92    2.02   1 
  -3 -12  -5    0.37    1.29   1 
  -3 -12  -6   39.06    3.77   1 
  -3 -12  -7    0.66    1.40   1 
  -3 -12  -8  130.55    7.10   1 
  -3 -12  -9    0.42    1.48   1 
  -3 -12 -10   78.38    5.90   1 
  -3 -12 -11    0.31    1.65   1 
  -3 -12 -12    8.09    2.56   1 
  -3 -12 -13    0.32    1.76   1 
  -3 -12 -14    5.17    2.44   1 
  -3 -12 -15   23.39    4.10   1 
  -3 -12 -16   19.24    4.02   1 
  -3 -12 -17    5.58    2.85   1 
   3  13 -17   10.78    1.65   1 
   3  13 -16   17.17    1.84   1 
   3  13 -15   58.94    2.95   1 
   3  13 -14   43.33    2.50   1 
   3  13 -13    0.08    0.70   1 
   3  13 -12   -0.26    0.69   1 
   3  13 -11   88.36    3.42   1 
   3  13 -10   58.21    2.86   1 
  -3 -13   9   31.29    2.43   1 
  -3 -13   8   95.25    4.01   1 
  -3 -13   7  164.40    5.34   1 
  -3 -13   6   20.72    2.18   1 
  -3 -13   5  149.68    5.29   1 
  -3 -13   4   16.30    1.97   1 
  -3 -13   3    7.49    1.64   1 
  -3 -13   2   47.93    3.35   1 
  -3 -13   1   24.87    2.60   1 
  -3 -13   0  246.36    7.93   1 
  -3 -13  -1   15.44    2.50   1 
  -3 -13  -2  461.16   11.60   1 
  -3 -13  -3   26.52    3.13   1 
  -3 -13  -4   75.90    5.07   1 
  -3 -13  -5    0.25    1.26   1 
  -3 -13  -6    1.84    1.61   1 
  -3 -13  -7   16.26    2.96   1 
  -3 -13  -8    7.42    2.24   1 
  -3 -13  -9    0.46    1.54   1 
  -3 -13 -10   50.50    4.81   1 
  -3 -13 -11    5.55    2.31   1 
  -3 -13 -12   25.08    3.94   1 
  -3 -13 -13    1.86    2.06   1 
  -3 -13 -14    3.26    2.36   1 
  -3 -13 -15   -0.16    2.16   1 
  -3 -13 -16    4.75    2.83   1 
   3  14 -14   34.10    2.27   1 
   3  14 -13   26.25    1.97   1 
   3  14 -12   70.79    3.08   1 
  -3 -14  11    4.97    1.41   1 
  -3 -14  10  128.35    4.55   1 
  -3 -14   9   -0.06    0.95   1 
  -3 -14   8  399.63    8.37   1 
  -3 -14   7    0.06    1.01   1 
  -3 -14   6   82.47    3.96   1 
  -3 -14   5   67.48    3.74   1 
  -3 -14   4    0.23    1.04   1 
  -3 -14   3   36.54    2.97   1 
  -3 -14   2   15.37    2.24   1 
  -3 -14   1    0.03    1.12   1 
  -3 -14   0   98.19    5.23   1 
  -3 -14  -1    1.72    1.32   1 
  -3 -14  -2   40.45    3.72   1 
  -3 -14  -3    4.62    1.82   1 
  -3 -14  -4   13.37    2.64   1 
  -3 -14  -5   17.02    2.96   1 
  -3 -14  -6   47.94    4.42   1 
  -3 -14  -7   -0.01    1.43   1 
  -3 -14  -8   40.75    4.30   1 
  -3 -14  -9    0.70    1.78   1 
  -3 -14 -10   11.02    2.92   1 
  -3 -14 -11    4.81    2.31   1 
  -3 -14 -12    2.72    2.08   1 
  -3 -14 -13   62.23    5.86   1 
  -3 -14 -14   24.64    4.31   1 
  -3 -14 -15   47.61    5.54   1 
  -3 -15  12    0.36    1.01   1 
  -3 -15  11   74.49    3.52   1 
  -3 -15  10   44.91    2.90   1 
  -3 -15   9    8.72    1.61   1 
  -3 -15   8   20.99    2.17   1 
  -3 -15   7    3.54    1.18   1 
  -3 -15   6   -0.49    0.90   1 
  -3 -15   5   24.89    2.49   1 
  -3 -15   4    8.16    1.74   1 
  -3 -15   3    7.99    1.77   1 
  -3 -15   2  192.00    6.98   1 
  -3 -15   1    0.22    1.19   1 
  -3 -15   0  257.97    8.66   1 
  -3 -15  -1    9.51    2.21   1 
  -3 -15  -2  107.69    5.99   1 
  -3 -15  -3   18.93    2.93   1 
  -3 -15  -4   27.40    3.55   1 
  -3 -15  -5  109.57    6.43   1 
  -3 -15  -6   35.35    3.91   1 
  -3 -15  -7   63.80    5.34   1 
  -3 -15  -8   55.53    4.99   1 
  -3 -15  -9    7.14    2.46   1 
  -3 -15 -10   39.79    4.55   1 
  -3 -15 -11    0.04    1.93   1 
  -3 -15 -12    2.84    2.25   1 
  -3 -15 -13    1.02    2.15   1 
  -3 -15 -14    1.08    2.36   1 
  -3 -16  10  129.42    4.69   1 
  -3 -16   9    0.00    1.03   1 
  -3 -16   8  125.31    4.82   1 
  -3 -16   7    0.45    1.03   1 
  -3 -16   6   33.54    2.79   1 
  -3 -16   5    0.68    1.08   1 
  -3 -16   4    0.19    1.13   1 
  -3 -16   3   41.82    3.44   1 
  -3 -16   2   12.73    2.38   1 
  -3 -16   1   10.85    2.26   1 
  -3 -16   0   25.28    3.01   1 
  -3 -16  -1   14.97    2.64   1 
  -3 -16  -2   12.30    2.55   1 
  -3 -16  -3   11.69    2.52   1 
  -3 -16  -4   -0.88    1.43   1 
  -3 -16  -5    1.19    1.72   1 
  -3 -16  -6    1.96    1.89   1 
  -3 -16  -7    4.59    2.15   1 
  -3 -16  -8   -0.20    1.73   1 
  -3 -16  -9    0.30    1.71   1 
  -3 -16 -10    0.04    1.86   1 
  -3 -16 -11   47.04    5.13   1 
  -3 -16 -12    6.41    2.87   1 
  -3 -16 -13   85.70    7.05   1 
  -3 -17   8    7.89    1.72   1 
  -3 -17   7    4.00    1.47   1 
  -3 -17   6    0.67    1.25   1 
  -3 -17   5   54.57    3.68   1 
  -3 -17   4   17.31    2.54   1 
  -3 -17   3   15.14    2.48   1 
  -3 -17   2   33.53    3.32   1 
  -3 -17   1   -0.37    1.37   1 
  -3 -17   0    7.97    2.05   1 
  -3 -17  -1    3.45    1.89   1 
  -3 -17  -2    0.35    1.47   1 
  -3 -17  -3   61.74    4.79   1 
  -3 -17  -4    0.66    1.74   1 
  -3 -17  -5   90.36    6.14   1 
  -3 -17  -6   22.40    3.57   1 
  -3 -17  -7   43.55    4.61   1 
  -3 -17  -8    4.90    2.36   1 
  -3 -17  -9    9.59    2.84   1 
  -3 -17 -10    0.51    2.05   1 
  -3 -17 -11   10.69    3.23   1 
  -3 -17 -12    2.57    2.38   1 
  -3 -18   6    5.52    1.72   1 
  -3 -18   5   39.45    3.30   1 
  -3 -18   4    1.12    1.44   1 
  -3 -18   3  112.88    5.69   1 
  -3 -18   2    0.71    1.35   1 
  -3 -18   1    5.60    2.02   1 
  -3 -18   0    3.11    1.88   1 
  -3 -18  -1    8.18    2.30   1 
  -3 -18  -2    3.60    1.94   1 
  -3 -18  -3    0.56    1.72   1 
  -3 -18  -4    0.92    1.65   1 
  -3 -18  -5   19.43    3.35   1 
  -3 -18  -6    7.11    2.41   1 
  -3 -18  -7    1.98    2.12   1 
  -3 -18  -8    2.11    2.10   1 
  -3 -18  -9   12.53    3.30   1 
  -3 -18 -10    0.41    2.16   1 
  -3 -19   3    1.91    1.57   1 
  -3 -19   2   26.94    3.21   1 
  -3 -19   1    1.15    1.59   1 
  -3 -19   0    1.07    1.47   1 
  -3 -19  -1    3.66    1.91   1 
  -3 -19  -2   11.37    2.73   1 
  -3 -19  -3    3.02    1.86   1 
  -3 -19  -4    7.41    2.61   1 
  -3 -19  -5   22.04    3.59   1 
  -3 -19  -6    1.68    2.10   1 
  -3 -19  -7    3.25    2.35   1 
  -3 -19  -8    4.59    2.46   1 
  -3 -19  -9    6.21    2.86   1 
  -3 -20   0   72.14    5.29   1 
  -3 -20  -1   12.94    2.84   1 
  -3 -20  -2   14.12    2.91   1 
  -3 -20  -3    0.23    1.82   1 
  -3 -20  -4    3.14    2.17   1 
  -3 -20  -5    1.68    2.00   1 
  -3 -20  -6    1.99    2.18   1 
  -3 -20  -7   11.25    3.11   1 
  -3 -20  -8   -0.69    2.47   1 
  -3 -21  -6   -0.85    2.32   1 
   4 -19 -12   -0.94    2.37   1 
   4 -19 -11    4.40    2.62   1 
   4 -19 -10    3.83    2.60   1 
   4 -19  -9    0.88    1.97   1 
   4 -18 -13   -0.76    2.30   1 
   4 -18 -12   -1.30    2.00   1 
   4 -18 -11    1.18    2.04   1 
   4 -18 -10    9.25    2.90   1 
   4 -18  -9   30.13    4.23   1 
   4 -18  -8    2.45    1.96   1 
   4 -18  -7   16.45    3.14   1 
   4 -18  -6    0.11    1.60   1 
   4 -18  -5    2.16    1.66   1 
   4 -18  -4    3.41    1.72   1 
   4 -17 -14    4.65    2.67   1 
   4 -17 -13   12.68    3.41   1 
   4 -17 -12   -0.58    2.08   1 
   4 -17 -11   -0.94    1.88   1 
   4 -17 -10   29.19    4.17   1 
   4 -17  -9    0.15    1.61   1 
   4 -17  -8   60.47    4.98   1 
   4 -17  -7   15.37    2.91   1 
   4 -17  -6    3.66    1.82   1 
   4 -17  -5   20.13    3.03   1 
   4 -17  -4    3.57    1.58   1 
   4 -17  -3    5.02    1.73   1 
   4 -17  -2    1.60    1.35   1 
   4 -17  -1    0.03    1.09   1 
   4 -16 -15   27.58    4.77   1 
   4 -16 -14    4.25    2.54   1 
   4 -16 -13   12.82    3.34   1 
   4 -16 -12    3.23    2.20   1 
   4 -16 -11    4.45    2.21   1 
   4 -16 -10    3.48    1.97   1 
   4 -16  -9    6.34    2.37   1 
   4 -16  -8    6.04    2.09   1 
   4 -16  -7    0.95    1.46   1 
   4 -16  -6   35.00    3.54   1 
   4 -16  -5   52.74    4.17   1 
   4 -16  -4  105.05    5.45   1 
   4 -16  -3   31.75    3.11   1 
   4 -16  -2  119.66    5.41   1 
   4 -16  -1    2.52    1.29   1 
   4 -16   0   32.89    2.77   1 
   4 -16   1    0.50    1.00   1 
   4 -15 -17   12.35    3.76   1 
   4 -15 -16   11.61    3.46   1 
   4 -15 -15    6.75    2.91   1 
   4 -15 -14   13.17    3.42   1 
   4 -15 -13    0.90    2.01   1 
   4 -15 -12   30.80    4.35   1 
   4 -15 -11    0.53    1.67   1 
   4 -15 -10  138.29    7.69   1 
   4 -15  -9   11.98    2.68   1 
   4 -15  -8   59.65    4.83   1 
   4 -15  -7   28.06    3.33   1 
   4 -15  -6    8.93    2.21   1 
   4 -15  -5   18.79    2.72   1 
   4 -15  -4   36.70    3.25   1 
   4 -15  -3    1.35    1.21   1 
   4 -15  -2  104.47    4.94   1 
   4 -15  -1    0.11    0.93   1 
   4 -15   0   28.28    2.55   1 
   4 -15   1   52.36    3.16   1 
   4 -15   2   13.38    1.80   1 
   4 -15   3    1.00    0.89   1 
   4 -14 -18    3.37    2.83   1 
   4 -14 -17   21.94    4.43   1 
   4 -14 -16   -0.01    2.13   1 
   4 -14 -15    7.05    2.89   1 
   4 -14 -14    0.57    1.88   1 
   4 -14 -13    0.01    1.75   1 
   4 -14 -12    0.99    1.78   1 
   4 -14 -11    1.78    1.63   1 
   4 -14 -10    9.05    2.48   1 
   4 -14  -9    0.52    1.49   1 
   4 -14  -8    0.24    1.33   1 
   4 -14  -7   52.47    4.29   1 
   4 -14  -6   16.93    2.61   1 
   4 -14  -5   46.93    3.73   1 
   4 -14  -4  100.10    5.07   1 
   4 -14  -3    1.32    1.17   1 
   4 -14  -2   47.17    3.30   1 
   4 -14  -1   10.68    1.77   1 
   4 -14   0    0.38    0.91   1 
   4 -14   1  225.11    6.17   1 
   4 -14   2    4.42    1.18   1 
   4 -14   3   83.54    3.46   1 
   4 -14   4   82.51    3.20   1 
   4 -14   5    2.66    0.89   1 
   4 -13 -19    0.57    2.52   1 
   4 -13 -18    0.91    2.40   1 
   4 -13 -17   -0.23    2.08   1 
   4 -13 -16   -0.07    1.88   1 
   4 -13 -15    4.11    2.22   1 
   4 -13 -14   75.70    6.24   1 
   4 -13 -13    8.67    2.56   1 
   4 -13 -12   82.80    6.12   1 
   4 -13 -11   -0.12    1.41   1 
   4 -13 -10   84.27    5.83   1 
   4 -13  -9    0.79    1.40   1 
   4 -13  -8   23.95    3.28   1 
   4 -13  -7   17.33    2.72   1 
   4 -13  -6   63.57    4.36   1 
   4 -13  -5   27.84    2.89   1 
   4 -13  -4  138.29    5.81   1 
   4 -13  -3   20.63    2.39   1 
   4 -13  -2  134.86    5.32   1 
   4 -13  -1    0.28    0.79   1 
   4 -13   0   78.69    3.75   1 
   4 -13   1    4.76    1.16   1 
   4 -13   2   21.02    1.90   1 
   4 -13   3   35.01    2.25   1 
   4 -13   4   41.31    2.24   1 
   4 -13   5    6.58    1.10   1 
   4 -13   6  134.42    3.47   1 
   4 -13   7    3.22    0.81   1 
   4 -12 -20    5.05    3.00   1 
   4 -12 -19    1.23    2.47   1 
   4 -12 -18    0.10    2.09   1 
   4 -12 -17    4.64    2.61   1 
   4 -12 -16    6.79    2.76   1 
   4 -12 -15   -0.31    1.77   1 
   4 -12 -14    6.09    2.45   1 
   4 -12 -13    0.45    1.52   1 
   4 -12 -12    2.15    1.72   1 
   4 -12 -11    2.36    1.61   1 
   4 -12 -10   19.86    3.17   1 
   4 -12  -9   25.30    3.14   1 
   4 -12  -8   -0.27    1.07   1 
   4 -12  -7   15.12    2.49   1 
   4 -12  -6   32.06    3.08   1 
   4 -12  -5    7.34    1.71   1 
   4 -12  -4   43.11    3.20   1 
   4 -12  -3    5.56    1.49   1 
   4 -12  -2    0.02    0.86   1 
   4 -12  -1  228.55    6.51   1 
   4 -12   0    1.92    0.95   1 
   4 -12   1  223.67    5.97   1 
   4 -12   2  122.79    4.13   1 
   4 -12   3   16.50    1.56   1 
   4 -12   4   81.23    3.00   1 
   4 -12   5   49.12    2.26   1 
   4 -12   6    3.69    0.87   1 
   4 -12   7  260.70    4.77   1 
  -4  12  -8    5.57    1.06   1 
   4 -11 -21   24.08    4.82   1 
   4 -11 -20   -1.64    2.20   1 
   4 -11 -19    6.32    2.94   1 
   4 -11 -18    0.32    2.06   1 
   4 -11 -17    4.67    2.32   1 
   4 -11 -16   14.80    3.32   1 
   4 -11 -15    0.59    1.74   1 
   4 -11 -14   37.35    4.37   1 
   4 -11 -13    0.95    1.53   1 
   4 -11 -12    0.99    1.55   1 
   4 -11 -11   22.71    3.32   1 
   4 -11 -10    1.30    1.33   1 
   4 -11  -9    1.37    1.25   1 
   4 -11  -8   11.48    2.22   1 
   4 -11  -7    3.46    1.45   1 
   4 -11  -6   69.22    4.28   1 
   4 -11  -5   11.14    1.93   1 
   4 -11  -4   49.95    3.37   1 
   4 -11  -3    0.21    0.76   1 
   4 -11  -2   -0.58    0.70   1 
   4 -11  -1    0.43    0.76   1 
   4 -11   0    0.24    0.70   1 
   4 -11   1   26.21    2.07   1 
   4 -11   2    5.23    1.14   1 
   4 -11   3   67.31    2.86   1 
   4 -11   4    3.15    0.87   1 
   4 -11   5    1.66    0.74   1 
   4 -11   6   18.07    1.46   1 
   4 -11   7    0.71    0.66   1 
  -4  11  -8    2.61    0.88   1 
  -4  11  -9   15.01    1.50   1 
  -4  11 -10   54.29    2.50   1 
  -4  11 -11   19.72    1.74   1 
   4 -10 -21    0.02    2.41   1 
   4 -10 -20   11.88    3.59   1 
   4 -10 -19    0.77    2.15   1 
   4 -10 -18   30.37    4.73   1 
   4 -10 -17   15.65    3.62   1 
   4 -10 -16   48.45    5.19   1 
   4 -10 -15   25.97    4.05   1 
   4 -10 -14   28.75    4.05   1 
   4 -10 -13    1.60    1.64   1 
   4 -10 -12    1.74    1.46   1 
   4 -10 -11   15.21    2.79   1 
   4 -10 -10    3.18    1.48   1 
   4 -10  -9    2.02    1.26   1 
   4 -10  -8   41.74    3.60   1 
   4 -10  -7   66.26    4.26   1 
   4 -10  -6   31.94    2.94   1 
   4 -10  -5   76.98    4.21   1 
   4 -10  -4   27.64    2.54   1 
   4 -10  -3   12.95    1.77   1 
   4 -10  -2   41.74    2.78   1 
   4 -10  -1   14.22    1.68   1 
   4 -10   0  179.87    5.30   1 
   4 -10   1   16.82    1.67   1 
   4 -10   2  231.88    5.46   1 
   4 -10   3    2.17    0.77   1 
   4 -10   4    3.41    0.83   1 
   4 -10   5   76.35    2.83   1 
   4 -10   6   60.41    2.49   1 
  -4  10  -7  275.71    5.62   1 
  -4  10  -8   27.60    1.93   1 
  -4  10  -9  168.92    4.42   1 
  -4  10 -10    0.76    0.81   1 
  -4  10 -11   14.91    1.66   1 
  -4  10 -12    5.84    1.30   1 
  -4  10 -13    2.32    1.15   1 
  -4  10 -14   16.31    2.04   1 
  -4  10 -15   47.95    3.08   1 
   4  -9 -22   16.19    4.09   1 
   4  -9 -21   24.91    4.74   1 
   4  -9 -20    2.71    2.39   1 
   4  -9 -19   34.55    4.98   1 
   4  -9 -18    0.50    1.90   1 
   4  -9 -17   -1.05    1.62   1 
   4  -9 -16    6.51    2.35   1 
   4  -9 -15   14.92    3.13   1 
   4  -9 -14   40.34    4.39   1 
   4  -9 -13   40.02    4.16   1 
   4  -9 -12   -0.60    1.16   1 
   4  -9 -11   44.14    4.06   1 
   4  -9 -10    1.81    1.33   1 
   4  -9  -9    4.03    1.52   1 
   4  -9  -8   22.59    2.70   1 
   4  -9  -7   10.75    1.99   1 
   4  -9  -6    3.54    1.26   1 
   4  -9  -5    8.77    1.62   1 
   4  -9  -4   44.49    3.02   1 
   4  -9  -3   34.00    2.53   1 
   4  -9  -2   33.11    2.48   1 
   4  -9  -1   -0.01    0.65   1 
   4  -9   0    4.43    1.05   1 
   4  -9   1   25.31    1.94   1 
   4  -9   2   10.94    1.31   1 
   4  -9   3    6.88    1.09   1 
   4  -9   4   19.46    1.55   1 
   4  -9   5   61.64    2.57   1 
   4  -9   6  224.98    4.92   1 
  -4   9  -7    0.31    0.75   1 
  -4   9  -8  126.99    3.97   1 
  -4   9  -9    9.96    1.40   1 
  -4   9 -10    1.45    0.88   1 
  -4   9 -11   99.69    3.83   1 
  -4   9 -12    6.60    1.44   1 
  -4   9 -13  135.16    4.91   1 
  -4   9 -14    1.11    1.05   1 
  -4   9 -15   21.80    2.31   1 
  -4   9 -16   10.32    1.86   1 
  -4   9 -17    0.41    1.14   1 
  -4   9 -18   15.27    2.32   1 
   4  -8 -23   12.95    4.10   1 
   4  -8 -22    1.20    2.52   1 
   4  -8 -21    9.58    3.42   1 
   4  -8 -20   39.89    5.42   1 
   4  -8 -19    8.59    2.82   1 
   4  -8 -18   39.22    4.77   1 
   4  -8 -17   11.70    2.99   1 
   4  -8 -16   40.76    4.48   1 
   4  -8 -15   -0.25    1.50   1 
   4  -8 -14   34.88    3.97   1 
   4  -8 -13   19.04    3.10   1 
   4  -8 -12  148.17    7.33   1 
   4  -8 -11   24.99    3.02   1 
   4  -8 -10  322.59   10.10   1 
   4  -8  -9    1.08    0.99   1 
   4  -8  -8  109.65    5.39   1 
   4  -8  -7   31.49    2.87   1 
   4  -8  -6   20.43    2.26   1 
   4  -8  -5    1.18    0.85   1 
   4  -8  -4   95.83    4.26   1 
   4  -8  -3    0.56    0.78   1 
   4  -8  -2  584.78    9.97   1 
   4  -8  -1    2.28    0.91   1 
   4  -8   0  841.94   11.56   1 
   4  -8   1    3.89    0.99   1 
   4  -8   2  136.49    4.00   1 
   4  -8   3   12.13    1.28   1 
   4  -8   4    1.72    0.73   1 
   4  -8   5  169.70    4.32   1 
   4  -8   6    0.35    0.61   1 
  -4   8  -7   87.30    3.39   1 
  -4   8  -8   82.92    3.38   1 
  -4   8  -9    9.03    1.44   1 
  -4   8 -10    1.13    0.83   1 
  -4   8 -11   44.55    2.78   1 
  -4   8 -12    6.65    1.44   1 
  -4   8 -13    0.09    1.01   1 
  -4   8 -14   21.31    2.32   1 
  -4   8 -15   18.88    2.42   1 
  -4   8 -16    2.28    1.34   1 
  -4   8 -17   12.97    2.16   1 
  -4   8 -18    3.49    1.53   1 
  -4   8 -19   -0.11    1.26   1 
  -4   8 -20   -0.62    1.22   1 
   4  -7 -24   17.60    4.36   1 
   4  -7 -23    7.24    3.13   1 
   4  -7 -22    6.75    3.02   1 
   4  -7 -21    0.00    2.14   1 
   4  -7 -20   12.67    3.37   1 
   4  -7 -19    0.63    1.83   1 
   4  -7 -18   58.80    5.68   1 
   4  -7 -17    5.68    2.23   1 
   4  -7 -16   60.06    5.34   1 
   4  -7 -15   44.39    4.51   1 
   4  -7 -14   26.51    3.67   1 
   4  -7 -13   16.08    2.85   1 
   4  -7 -12   10.35    2.28   1 
   4  -7 -11    0.49    1.10   1 
   4  -7 -10   41.89    3.60   1 
   4  -7  -9    1.41    1.15   1 
   4  -7  -8    7.76    1.71   1 
   4  -7  -7   32.40    2.83   1 
   4  -7  -6    9.43    1.67   1 
   4  -7  -5   70.88    3.74   1 
   4  -7  -4    0.01    0.65   1 
   4  -7  -3   48.50    2.86   1 
   4  -7  -2    0.34    0.63   1 
   4  -7  -1   18.79    1.78   1 
   4  -7   0    4.89    1.07   1 
   4  -7   1    1.03    0.68   1 
   4  -7   2   92.11    3.28   1 
   4  -7   3  235.14    5.21   1 
   4  -7   4  138.57    3.96   1 
   4  -7   5  127.52    3.85   1 
  -4   7  -6  132.92    4.28   1 
   4  -7   6  120.94    3.69   1 
  -4   7  -7   20.09    1.87   1 
  -4   7  -8    2.16    0.93   1 
  -4   7  -9  169.35    5.08   1 
  -4   7 -10   31.27    2.40   1 
  -4   7 -11  500.00    9.46   1 
  -4   7 -12    8.66    1.66   1 
  -4   7 -13  193.30    6.40   1 
  -4   7 -14    8.46    1.80   1 
  -4   7 -15   44.41    3.44   1 
  -4   7 -16    8.04    1.87   1 
  -4   7 -17    8.03    1.93   1 
  -4   7 -18    8.82    2.08   1 
  -4   7 -19    0.16    1.31   1 
  -4   7 -20   21.14    2.93   1 
  -4   7 -21   10.23    2.43   1 
  -4   7 -22    3.62    1.84   1 
   4  -6 -24    2.64    2.60   1 
   4  -6 -23    9.61    3.43   1 
   4  -6 -22   -0.24    2.10   1 
   4  -6 -21   -0.53    1.85   1 
   4  -6 -20    1.77    2.05   1 
   4  -6 -19    4.84    2.16   1 
   4  -6 -18    0.50    1.66   1 
   4  -6 -17    3.63    1.95   1 
   4  -6 -16    0.42    1.48   1 
   4  -6 -15   78.93    5.73   1 
   4  -6 -14   42.22    4.09   1 
   4  -6 -13   22.76    3.15   1 
   4  -6 -12  265.47    9.40   1 
   4  -6 -11    0.76    1.02   1 
   4  -6 -10  203.48    7.57   1 
   4  -6  -9    0.80    0.93   1 
   4  -6  -8   71.16    4.16   1 
   4  -6  -7  314.98    8.25   1 
   4  -6  -6   18.41    2.10   1 
   4  -6  -5  325.69    7.82   1 
   4  -6  -4  315.32    7.45   1 
   4  -6  -3  118.54    4.34   1 
   4  -6  -2  398.88    7.88   1 
   4  -6  -1   11.32    1.38   1 
   4  -6   0  142.40    4.28   1 
   4  -6   1   23.66    1.74   1 
   4  -6   2   70.79    2.88   1 
   4  -6   3  353.22    6.63   1 
   4  -6   4  126.35    3.92   1 
   4  -6   5  306.61    6.19   1 
  -4   6  -6   76.10    3.31   1 
  -4   6  -7   46.54    2.68   1 
  -4   6  -8   35.97    2.45   1 
  -4   6  -9    0.88    0.86   1 
  -4   6 -10    6.26    1.41   1 
  -4   6 -11   12.54    1.86   1 
  -4   6 -12   20.45    2.31   1 
  -4   6 -13    0.27    0.98   1 
  -4   6 -14   25.00    2.64   1 
  -4   6 -15    4.88    1.64   1 
  -4   6 -16   37.09    3.42   1 
  -4   6 -17   24.74    3.10   1 
  -4   6 -18   17.45    2.80   1 
  -4   6 -19   29.80    3.36   1 
  -4   6 -20    0.46    1.39   1 
  -4   6 -21   24.07    3.34   1 
  -4   6 -22    0.63    1.73   1 
  -4   6 -23    1.81    1.87   1 
  -4   6 -24   15.73    3.21   1 
   4  -5 -25    8.18    3.50   1 
   4  -5 -24   -0.67    2.08   1 
   4  -5 -23    1.04    2.27   1 
   4  -5 -22    4.27    2.53   1 
   4  -5 -21    8.74    2.82   1 
   4  -5 -20   51.45    5.46   1 
   4  -5 -19   19.41    3.68   1 
   4  -5 -18   65.78    5.67   1 
   4  -5 -17    0.17    1.47   1 
   4  -5 -16   19.88    3.29   1 
   4  -5 -15   -0.02    1.03   1 
   4  -5 -14   27.92    3.30   1 
   4  -5 -13    4.33    1.66   1 
   4  -5 -12   63.48    4.54   1 
   4  -5 -11   48.41    3.80   1 
   4  -5 -10  155.13    6.40   1 
   4  -5  -9    0.59    0.85   1 
   4  -5  -8   60.68    3.68   1 
   4  -5  -7   -0.46    0.71   1 
   4  -5  -6   22.46    2.17   1 
   4  -5  -5   24.21    2.15   1 
   4  -5  -4    0.37    0.69   1 
   4  -5  -3    0.96    0.69   1 
   4  -5  -2   16.14    1.60   1 
   4  -5  -1   27.30    1.94   1 
   4  -5   0    6.12    1.06   1 
   4  -5   1  326.86    6.40   1 
   4  -5   2    2.28    0.81   1 
   4  -5   3  424.79    7.35   1 
   4  -5   4    3.42    0.90   1 
   4  -5   5  277.69    6.04   1 
  -4   5  -6   12.97    1.65   1 
  -4   5  -7   52.80    2.93   1 
  -4   5  -8   14.62    1.86   1 
  -4   5  -9  415.07    8.63   1 
  -4   5 -10    4.57    1.30   1 
  -4   5 -11  575.34   10.95   1 
  -4   5 -12   15.55    2.28   1 
  -4   5 -13  246.38    7.74   1 
  -4   5 -14    0.36    1.22   1 
  -4   5 -15   23.16    2.74   1 
  -4   5 -16   30.61    3.19   1 
  -4   5 -17   81.66    5.08   1 
  -4   5 -18   57.23    4.48   1 
  -4   5 -19  109.12    6.11   1 
  -4   5 -20    2.36    1.83   1 
  -4   5 -21   23.59    3.40   1 
  -4   5 -22    9.34    2.59   1 
  -4   5 -23    0.99    1.83   1 
  -4   5 -24    4.30    2.34   1 
  -4   5 -25    0.23    1.98   1 
   4  -4 -26    0.36    2.62   1 
   4  -4 -25    0.70    2.38   1 
   4  -4 -24    2.78    2.60   1 
   4  -4 -23   -0.11    2.08   1 
   4  -4 -22    6.92    2.74   1 
   4  -4 -21   19.83    3.74   1 
   4  -4 -20   10.84    2.96   1 
   4  -4 -19   15.38    3.18   1 
   4  -4 -18   23.72    3.73   1 
   4  -4 -17    0.90    1.50   1 
   4  -4 -16    4.03    1.76   1 
   4  -4 -15   12.59    2.56   1 
   4  -4 -14   98.02    5.84   1 
   4  -4 -13   39.74    3.66   1 
   4  -4 -12   60.46    4.29   1 
   4  -4 -11    9.86    1.89   1 
   4  -4 -10    6.12    1.54   1 
   4  -4  -9  123.84    5.30   1 
   4  -4  -8    3.42    1.20   1 
   4  -4  -7  608.59   11.18   1 
   4  -4  -6   32.55    2.52   1 
   4  -4  -5  241.18    6.34   1 
   4  -4  -4  159.58    4.96   1 
   4  -4  -3   60.95    3.01   1 
   4  -4  -2   86.86    3.47   1 
   4  -4  -1  111.82    3.82   1 
   4  -4   0  108.65    3.67   1 
   4  -4   1  389.52    7.10   1 
   4  -4   2    3.60    0.88   1 
   4  -4   3   57.61    2.74   1 
   4  -4   4   59.63    2.85   1 
  -4   4  -5   44.00    2.64   1 
  -4   4  -6  101.61    4.05   1 
  -4   4  -7   33.64    2.50   1 
  -4   4  -8    1.39    0.93   1 
  -4   4  -9   23.81    2.30   1 
  -4   4 -10   17.19    2.13   1 
  -4   4 -11   38.28    3.01   1 
  -4   4 -12    0.60    1.09   1 
  -4   4 -13   10.37    2.02   1 
  -4   4 -14  145.47    6.34   1 
  -4   4 -15   11.74    2.28   1 
  -4   4 -16   32.38    3.40   1 
  -4   4 -17    5.99    1.91   1 
  -4   4 -18    6.57    2.10   1 
  -4   4 -19   10.55    2.43   1 
  -4   4 -20   28.82    3.59   1 
  -4   4 -21    0.31    1.53   1 
  -4   4 -22   46.75    4.59   1 
  -4   4 -23    2.48    1.99   1 
  -4   4 -24   43.52    4.73   1 
  -4   4 -25    6.36    2.74   1 
  -4   4 -26    8.50    3.10   1 
   4  -3 -26    4.12    2.93   1 
   4  -3 -25    2.91    2.43   1 
   4  -3 -24    1.99    2.28   1 
   4  -3 -23    4.48    2.38   1 
   4  -3 -22    6.68    2.79   1 
   4  -3 -21   16.95    3.56   1 
   4  -3 -20    0.99    1.82   1 
   4  -3 -19    0.35    1.62   1 
   4  -3 -18    0.03    1.34   1 
   4  -3 -17    9.54    2.43   1 
   4  -3 -16    1.62    1.41   1 
   4  -3 -15   61.09    4.71   1 
   4  -3 -14    5.95    1.81   1 
   4  -3 -13   99.28    5.45   1 
   4  -3 -12    2.10    1.15   1 
   4  -3 -11   17.89    2.43   1 
   4  -3 -10    3.99    1.31   1 
   4  -3  -9   50.37    3.40   1 
   4  -3  -8   49.78    3.18   1 
   4  -3  -7  172.73    5.66   1 
   4  -3  -6   10.06    1.50   1 
   4  -3  -5  152.44    4.94   1 
   4  -3  -4    3.72    0.97   1 
   4  -3  -3   23.61    1.90   1 
   4  -3  -2   26.13    1.93   1 
   4  -3  -1  244.87    5.62   1 
   4  -3   0   76.99    3.11   1 
   4  -3   1  202.79    5.15   1 
   4  -3   2    0.90    0.62   1 
   4  -3   3   10.85    1.34   1 
   4  -3   4  288.18    6.36   1 
  -4   3  -5    4.24    1.14   1 
  -4   3  -6  254.62    6.55   1 
  -4   3  -7  112.96    4.49   1 
  -4   3  -8  127.12    4.88   1 
  -4   3  -9  143.05    5.39   1 
  -4   3 -10   -0.18    0.87   1 
  -4   3 -11   34.94    3.00   1 
  -4   3 -12    2.78    1.40   1 
  -4   3 -13    1.75    1.34   1 
  -4   3 -14   84.68    5.02   1 
  -4   3 -15   29.45    3.22   1 
  -4   3 -16   68.70    4.84   1 
  -4   3 -17  134.26    6.75   1 
  -4   3 -18   66.23    5.01   1 
  -4   3 -19   33.37    3.73   1 
  -4   3 -20   20.72    3.33   1 
  -4   3 -21   -0.55    1.55   1 
  -4   3 -22    6.13    2.35   1 
  -4   3 -23   -0.11    1.81   1 
  -4   3 -24   22.86    3.93   1 
  -4   3 -25   17.19    3.68   1 
  -4   3 -26    5.07    2.93   1 
   4  -2 -27    0.19    2.59   1 
   4  -2 -26   26.34    4.92   1 
   4  -2 -25    2.89    2.50   1 
   4  -2 -24   46.40    5.47   1 
   4  -2 -23    0.80    1.88   1 
   4  -2 -22    5.56    2.33   1 
   4  -2 -21    0.56    1.63   1 
   4  -2 -20    2.32    1.79   1 
   4  -2 -19    0.45    1.37   1 
   4  -2 -18    3.10    1.69   1 
   4  -2 -17    9.82    2.41   1 
   4  -2 -16   34.31    3.67   1 
   4  -2 -15   70.27    4.86   1 
   4  -2 -14   70.15    4.68   1 
   4  -2 -13   50.33    3.89   1 
   4  -2 -12   11.20    1.95   1 
   4  -2 -11   12.51    2.00   1 
   4  -2 -10    1.53    0.94   1 
   4  -2  -9  175.55    6.00   1 
   4  -2  -8    1.95    0.96   1 
   4  -2  -7  367.15    8.20   1 
   4  -2  -6   12.38    1.53   1 
   4  -2  -5  206.98    5.76   1 
   4  -2  -4    0.38    0.55   1 
   4  -2  -3  118.02    4.04   1 
   4  -2  -2  125.99    4.11   1 
   4  -2  -1  201.35    5.12   1 
   4  -2   0  665.90    9.75   1 
   4  -2   1  175.27    4.86   1 
   4  -2   2    4.85    1.01   1 
   4  -2   3   32.14    2.18   1 
  -4   2  -4   72.94    3.46   1 
  -4   2  -5  185.07    5.58   1 
  -4   2  -6  134.30    4.93   1 
  -4   2  -7   15.32    1.91   1 
  -4   2  -8   69.50    3.76   1 
  -4   2  -9   25.67    2.51   1 
  -4   2 -10   22.20    2.40   1 
  -4   2 -11   39.36    3.21   1 
  -4   2 -12    7.35    1.83   1 
  -4   2 -13   22.93    2.76   1 
  -4   2 -14   12.60    2.38   1 
  -4   2 -15    5.53    1.95   1 
  -4   2 -16    8.31    2.20   1 
  -4   2 -17   -0.08    1.33   1 
  -4   2 -18    2.17    1.76   1 
  -4   2 -19    6.40    2.23   1 
  -4   2 -20   13.96    2.95   1 
  -4   2 -21    4.25    2.18   1 
  -4   2 -22   11.72    2.85   1 
  -4   2 -23   -0.03    1.99   1 
  -4   2 -24   17.32    3.71   1 
  -4   2 -25   -0.55    2.24   1 
   4  -1 -27    3.59    2.66   1 
   4  -1 -26    8.55    3.28   1 
   4  -1 -25    5.60    2.62   1 
   4  -1 -24   23.10    4.29   1 
   4  -1 -23   -0.21    1.75   1 
   4  -1 -22    5.20    2.27   1 
   4  -1 -21   28.52    4.11   1 
   4  -1 -20    3.66    1.75   1 
   4  -1 -19   13.41    2.68   1 
   4  -1 -18   10.21    2.45   1 
   4  -1 -17    1.61    1.29   1 
   4  -1 -16    0.69    1.12   1 
   4  -1 -15   26.11    2.98   1 
   4  -1 -14    8.12    1.91   1 
   4  -1 -13    2.38    1.15   1 
   4  -1 -12    3.45    1.22   1 
   4  -1 -11   45.85    3.33   1 
   4  -1 -10   98.01    4.53   1 
   4  -1  -9    0.50    0.71   1 
   4  -1  -8  121.49    4.73   1 
   4  -1  -7  187.81    5.63   1 
   4  -1  -6   12.97    1.62   1 
   4  -1  -5    3.48    0.91   1 
   4  -1  -4    0.63    0.54   1 
   4  -1  -3  106.08    3.79   1 
   4  -1  -2  141.16    4.31   1 
   4  -1  -1   63.11    2.92   1 
   4  -1   0  196.67    5.23   1 
   4  -1   1    2.64    0.85   1 
   4  -1   2    1.72    0.78   1 
   4  -1   3    3.66    0.94   1 
  -4   1  -4  128.39    4.70   1 
  -4   1  -5  103.08    4.31   1 
  -4   1  -6  158.60    5.49   1 
  -4   1  -7   61.73    3.55   1 
  -4   1  -8   52.92    3.43   1 
  -4   1  -9   15.02    2.14   1 
  -4   1 -10   18.53    2.24   1 
  -4   1 -11   73.27    4.42   1 
  -4   1 -12   34.47    3.26   1 
  -4   1 -13   23.47    2.91   1 
  -4   1 -14   49.81    4.15   1 
  -4   1 -15   31.84    3.48   1 
  -4   1 -16   15.53    2.71   1 
  -4   1 -17   50.54    4.42   1 
  -4   1 -18   17.46    3.10   1 
  -4   1 -19   -0.04    1.55   1 
  -4   1 -20   27.76    3.93   1 
  -4   1 -21   10.59    2.80   1 
  -4   1 -22  103.94    7.12   1 
  -4   1 -23    2.29    2.15   1 
  -4   1 -24   46.08    5.27   1 
  -4   1 -25    6.83    2.94   1 
   4   0 -28   14.09    3.77   1 
   4   0 -27    1.15    2.37   1 
   4   0 -26   46.52    5.87   1 
   4   0 -25    2.66    2.19   1 
   4   0 -24   60.56    5.89   1 
   4   0 -23   -1.31    1.54   1 
   4   0 -22   10.63    2.81   1 
   4   0 -21   21.02    3.54   1 
   4   0 -20   59.35    5.09   1 
   4   0 -19   33.69    3.80   1 
   4   0 -18  210.98    8.80   1 
   4   0 -17    3.57    1.61   1 
   4   0 -16  210.34    8.19   1 
   4   0 -15    0.23    0.97   1 
   4   0 -14    9.67    1.89   1 
   4   0 -13    2.64    1.20   1 
   4   0 -12   37.62    3.04   1 
   4   0 -11   31.00    2.68   1 
   4   0 -10  105.08    4.58   1 
   4   0  -9  204.20    6.20   1 
   4   0  -8  819.22   12.46   1 
   4   0  -7   67.78    3.38   1 
   4   0  -6   16.18    1.69   1 
   4   0  -5    0.87    0.62   1 
   4   0  -4  127.84    4.23   1 
   4   0  -3   20.33    1.71   1 
   4   0  -2  339.96    6.88   1 
   4   0  -1  166.68    4.82   1 
   4   0   0   15.22    1.57   1 
   4   0   1    0.57    0.56   1 
   4   0   2    3.75    0.96   1 
  -4   0  -3  255.31    6.66   1 
  -4   0  -4   32.29    2.48   1 
  -4   0  -5   24.99    2.29   1 
  -4   0  -6  182.49    6.08   1 
  -4   0  -7    3.50    1.30   1 
  -4   0  -8   31.77    2.82   1 
  -4   0  -9    3.59    1.37   1 
  -4   0 -10   22.70    2.64   1 
  -4   0 -11   -0.47    1.10   1 
  -4   0 -12    8.37    2.04   1 
  -4   0 -13    8.07    2.08   1 
  -4   0 -14   11.12    2.40   1 
  -4   0 -15    1.13    1.48   1 
  -4   0 -16    3.71    1.86   1 
  -4   0 -17    0.84    1.56   1 
  -4   0 -18    1.21    1.74   1 
  -4   0 -19    1.17    1.72   1 
  -4   0 -20    1.54    1.86   1 
  -4   0 -21   -0.05    1.80   1 
  -4   0 -22    1.89    2.14   1 
  -4   0 -23   -0.60    2.10   1 
  -4   0 -24   -0.35    2.30   1 
  -4   0 -25    1.88    2.54   1 
   4   1 -28   18.08    4.15   1 
   4   1 -27    5.40    2.75   1 
   4   1 -26   39.31    5.26   1 
   4   1 -25    1.82    2.14   1 
   4   1 -24   39.58    4.77   1 
   4   1 -23   22.39    3.80   1 
   4   1 -22   42.46    4.50   1 
   4   1 -21    7.72    2.39   1 
   4   1 -20    2.62    1.60   1 
   4   1 -19    1.83    1.49   1 
   4   1 -18    4.20    1.77   1 
   4   1 -17    0.12    1.10   1 
   4   1 -16    4.96    1.62   1 
   4   1 -15   23.06    2.67   1 
   4   1 -14   15.72    2.31   1 
   4   1 -13   94.51    4.74   1 
   4   1 -12   26.69    2.53   1 
   4   1 -11   41.20    2.94   1 
   4   1 -10  133.16    5.03   1 
   4   1  -9    5.48    1.18   1 
   4   1  -8    5.75    1.22   1 
   4   1  -7   48.96    2.82   1 
   4   1  -6   18.41    1.78   1 
   4   1  -5  567.31    9.40   1 
   4   1  -4  365.47    7.24   1 
   4   1  -3  439.19    8.03   1 
   4   1  -2   39.64    2.37   1 
   4   1  -1   79.48    3.38   1 
   4   1   0   72.60    3.28   1 
   4   1   1   30.68    2.23   1 
  -4  -1  -2    0.87    0.78   1 
   4   1   2    0.89    0.68   1 
  -4  -1  -3  253.00    6.76   1 
  -4  -1  -4    0.92    0.90   1 
  -4  -1  -5  359.75    8.58   1 
  -4  -1  -6    4.98    1.39   1 
  -4  -1  -7    4.48    1.38   1 
  -4  -1  -8    1.04    0.98   1 
  -4  -1  -9   20.36    2.46   1 
  -4  -1 -10   51.73    3.82   1 
  -4  -1 -11    0.11    1.15   1 
  -4  -1 -12   24.70    3.02   1 
  -4  -1 -13   28.98    3.34   1 
  -4  -1 -14    4.54    1.74   1 
  -4  -1 -15    1.66    1.47   1 
  -4  -1 -16    2.22    1.72   1 
  -4  -1 -17   12.26    2.63   1 
  -4  -1 -18   -0.28    1.57   1 
  -4  -1 -19   13.88    3.02   1 
  -4  -1 -20   39.01    4.45   1 
  -4  -1 -21   -0.57    1.86   1 
  -4  -1 -22   62.91    5.90   1 
  -4  -1 -23    4.08    2.49   1 
  -4  -1 -24    6.02    2.89   1 
   4   2 -29   -0.64    2.47   1 
   4   2 -28    9.85    3.36   1 
   4   2 -27    5.35    2.71   1 
   4   2 -26   22.92    4.09   1 
   4   2 -25   -0.02    1.82   1 
   4   2 -24   19.53    3.52   1 
   4   2 -23   19.85    3.44   1 
   4   2 -22   10.70    2.63   1 
   4   2 -21  145.95    7.58   1 
   4   2 -20  121.20    6.71   1 
   4   2 -19  103.84    6.00   1 
   4   2 -18  173.63    7.46   1 
   4   2 -17   72.27    4.73   1 
   4   2 -16   44.89    3.69   1 
   4   2 -15   83.00    4.70   1 
   4   2 -14    3.03    1.17   1 
   4   2 -13  175.05    6.27   1 
   4   2 -12   44.58    3.12   1 
   4   2 -11  250.94    6.97   1 
   4   2 -10  168.03    5.55   1 
   4   2  -9  449.45    9.12   1 
   4   2  -8  352.89    7.72   1 
   4   2  -7   -0.06    0.57   1 
   4   2  -6   82.97    3.54   1 
   4   2  -5  140.62    4.50   1 
   4   2  -4   14.76    1.58   1 
   4   2  -3  122.13    4.17   1 
   4   2  -2   19.53    1.73   1 
   4   2  -1  136.09    4.49   1 
   4   2   0   82.74    3.57   1 
   4   2   1  135.87    4.67   1 
  -4  -2  -2   25.90    2.33   1 
  -4  -2  -3   44.60    2.99   1 
  -4  -2  -4    6.54    1.51   1 
  -4  -2  -5   17.22    2.07   1 
  -4  -2  -6    2.37    1.09   1 
  -4  -2  -7   -0.61    0.84   1 
  -4  -2  -8   38.46    3.23   1 
  -4  -2  -9    1.12    1.16   1 
  -4  -2 -10   27.88    3.05   1 
  -4  -2 -11    8.81    2.10   1 
  -4  -2 -12    3.47    1.71   1 
  -4  -2 -13   75.89    5.22   1 
  -4  -2 -14    0.98    1.43   1 
  -4  -2 -15    6.96    2.29   1 
  -4  -2 -16   17.99    3.09   1 
  -4  -2 -17   -0.81    1.57   1 
  -4  -2 -18    2.59    1.84   1 
  -4  -2 -19    1.06    1.82   1 
  -4  -2 -20    0.90    1.95   1 
  -4  -2 -21    6.29    2.62   1 
  -4  -2 -22   -0.08    1.96   1 
  -4  -2 -23    5.17    2.83   1 
  -4  -2 -24    8.00    3.22   1 
   4   3 -29    2.81    2.53   1 
   4   3 -28   20.53    4.11   1 
   4   3 -27    2.85    2.29   1 
   4   3 -26   52.75    5.47   1 
   4   3 -25    6.23    2.52   1 
   4   3 -24   26.67    3.95   1 
   4   3 -23    1.66    1.64   1 
   4   3 -22    4.06    1.96   1 
   4   3 -21   37.44    3.98   1 
   4   3 -20    8.75    2.27   1 
   4   3 -19   44.13    3.99   1 
   4   3 -18   67.78    4.67   1 
   4   3 -17    4.12    1.44   1 
   4   3 -16    8.61    1.82   1 
   4   3 -15    7.02    1.61   1 
   4   3 -14    0.24    0.73   1 
   4   3 -13    5.23    1.38   1 
   4   3 -12   23.16    2.26   1 
   4   3 -11   76.00    3.78   1 
   4   3 -10  161.31    5.43   1 
   4   3  -9  221.59    6.13   1 
   4   3  -8  231.04    6.18   1 
   4   3  -7  681.91   10.67   1 
   4   3  -6  106.10    3.98   1 
   4   3  -5  745.58   10.93   1 
   4   3  -4   45.25    2.57   1 
   4   3  -3  130.82    4.42   1 
   4   3  -2   82.53    3.55   1 
   4   3  -1  105.36    4.08   1 
   4   3   0   12.74    1.58   1 
  -4  -3  -1  410.51    8.84   1 
  -4  -3  -2  145.55    5.26   1 
  -4  -3  -3  900.71   14.04   1 
  -4  -3  -4   28.84    2.57   1 
  -4  -3  -5  208.02    6.82   1 
  -4  -3  -6   30.14    2.82   1 
  -4  -3  -7   36.19    3.15   1 
  -4  -3  -8   67.72    4.30   1 
  -4  -3  -9   56.40    4.10   1 
  -4  -3 -10   84.04    5.12   1 
  -4  -3 -11  127.19    6.48   1 
  -4  -3 -12   13.00    2.58   1 
  -4  -3 -13   21.59    3.30   1 
  -4  -3 -14    2.84    1.61   1 
  -4  -3 -15    2.25    1.78   1 
  -4  -3 -16   13.17    2.87   1 
  -4  -3 -17    0.92    1.87   1 
  -4  -3 -18    3.07    1.98   1 
  -4  -3 -19    3.92    2.28   1 
  -4  -3 -20   14.72    3.41   1 
  -4  -3 -21   33.45    4.76   1 
  -4  -3 -22    0.71    2.26   1 
  -4  -3 -23   -0.30    2.30   1 
   4   4 -30    8.48    3.24   1 
   4   4 -29    1.31    2.30   1 
   4   4 -28    5.90    2.69   1 
   4   4 -27    0.26    2.08   1 
   4   4 -26    0.71    1.86   1 
   4   4 -25    6.42    2.35   1 
   4   4 -24    1.78    1.67   1 
   4   4 -23    8.58    2.46   1 
   4   4 -22   53.98    4.71   1 
   4   4 -21   83.39    5.57   1 
   4   4 -20  338.60   10.65   1 
   4   4 -19   13.89    2.48   1 
   4   4 -18   56.90    4.14   1 
   4   4 -17   36.26    3.22   1 
   4   4 -16   14.81    2.21   1 
   4   4 -15  182.46    6.58   1 
   4   4 -14   19.54    2.23   1 
   4   4 -13  251.49    7.20   1 
   4   4 -12   42.71    2.91   1 
   4   4 -11  594.82   10.81   1 
   4   4 -10    2.80    1.01   1 
   4   4  -9   24.54    2.12   1 
   4   4  -8   15.27    1.67   1 
   4   4  -7   48.25    2.74   1 
   4   4  -6    0.84    0.67   1 
   4   4  -5  311.65    6.84   1 
   4   4  -4  187.24    5.35   1 
   4   4  -3  444.84    8.50   1 
   4   4  -2  254.96    6.37   1 
   4   4  -1   23.73    2.03   1 
  -4  -4   0   20.35    2.09   1 
  -4  -4  -1    1.59    0.94   1 
  -4  -4  -2    3.06    1.17   1 
  -4  -4  -3    0.14    0.77   1 
  -4  -4  -4   86.14    4.45   1 
  -4  -4  -5   33.38    2.92   1 
  -4  -4  -6  155.54    6.23   1 
  -4  -4  -7    1.41    1.19   1 
  -4  -4  -8  288.76    8.97   1 
  -4  -4  -9    0.57    1.21   1 
  -4  -4 -10   67.09    4.68   1 
  -4  -4 -11   28.84    3.41   1 
  -4  -4 -12   10.47    2.37   1 
  -4  -4 -13    0.54    1.47   1 
  -4  -4 -14   44.72    4.45   1 
  -4  -4 -15   -0.02    1.54   1 
  -4  -4 -16  166.16    8.46   1 
  -4  -4 -17   21.51    3.77   1 
  -4  -4 -18   42.93    4.73   1 
  -4  -4 -19   16.14    3.52   1 
  -4  -4 -20   33.79    4.81   1 
  -4  -4 -21    4.54    2.76   1 
  -4  -4 -22   42.77    5.59   1 
   4   5 -30    2.09    2.72   1 
   4   5 -29   13.51    3.54   1 
   4   5 -28   -0.31    1.99   1 
   4   5 -27    2.88    2.15   1 
   4   5 -26   -0.27    1.66   1 
   4   5 -25    3.19    1.84   1 
   4   5 -24    0.63    1.54   1 
   4   5 -23    8.78    2.32   1 
   4   5 -22   21.61    3.20   1 
   4   5 -21   23.16    3.20   1 
   4   5 -20    2.77    1.46   1 
   4   5 -19   14.61    2.38   1 
   4   5 -18   10.09    2.00   1 
   4   5 -17    4.29    1.44   1 
   4   5 -16   28.51    2.74   1 
   4   5 -15    1.92    1.03   1 
   4   5 -14   74.88    4.00   1 
   4   5 -13    6.82    1.47   1 
   4   5 -12    1.53    0.87   1 
   4   5 -11   49.50    3.05   1 
   4   5 -10    0.84    0.75   1 
   4   5  -9  574.53    9.99   1 
   4   5  -8   51.64    2.88   1 
   4   5  -7  181.52    5.28   1 
   4   5  -6    2.71    0.90   1 
   4   5  -5   28.59    2.09   1 
   4   5  -4  144.71    4.71   1 
   4   5  -3   43.18    2.66   1 
   4   5  -2  581.97   10.10   1 
   4   5  -1  120.78    4.48   1 
  -4  -5   0  164.70    5.67   1 
  -4  -5  -1  243.35    7.04   1 
  -4  -5  -2    1.31    0.95   1 
  -4  -5  -3  136.69    5.53   1 
  -4  -5  -4    0.88    1.00   1 
  -4  -5  -5   50.24    3.65   1 
  -4  -5  -6  173.21    6.71   1 
  -4  -5  -7  124.75    5.86   1 
  -4  -5  -8  175.47    7.14   1 
  -4  -5  -9  237.76    8.63   1 
  -4  -5 -10   56.23    4.53   1 
  -4  -5 -11  124.78    6.74   1 
  -4  -5 -12    8.93    2.33   1 
  -4  -5 -13    5.15    2.07   1 
  -4  -5 -14    3.59    1.91   1 
  -4  -5 -15    1.67    1.75   1 
  -4  -5 -16    8.73    2.79   1 
  -4  -5 -17   14.67    3.13   1 
  -4  -5 -18   16.23    3.52   1 
  -4  -5 -19   34.56    4.75   1 
  -4  -5 -20    1.61    2.19   1 
  -4  -5 -21   12.88    3.51   1 
  -4  -5 -22    5.01    2.87   1 
   4   6 -30   42.53    5.66   1 
   4   6 -29    4.11    2.50   1 
   4   6 -28    1.77    2.00   1 
   4   6 -27   -0.10    1.81   1 
   4   6 -26    0.54    1.65   1 
   4   6 -25   -0.44    1.47   1 
   4   6 -24   58.08    4.89   1 
   4   6 -23    0.94    1.40   1 
   4   6 -22  119.20    6.41   1 
   4   6 -21   12.89    2.46   1 
   4   6 -20   58.99    4.30   1 
   4   6 -19   14.96    2.39   1 
   4   6 -18    0.34    0.95   1 
   4   6 -17  102.09    5.01   1 
   4   6 -16    0.17    0.89   1 
   4   6 -15  156.36    5.82   1 
   4   6 -14    7.62    1.52   1 
   4   6 -13   12.26    1.80   1 
   4   6 -12   57.33    3.26   1 
   4   6 -11    0.79    0.78   1 
   4   6 -10   78.08    3.63   1 
   4   6  -9    0.00    0.61   1 
   4   6  -8  169.83    5.15   1 
   4   6  -7   32.91    2.31   1 
   4   6  -6   60.66    3.05   1 
   4   6  -5   90.31    3.75   1 
   4   6  -4    3.72    1.03   1 
   4   6  -3    6.25    1.23   1 
   4   6  -2    0.97    0.75   1 
  -4  -6   1    0.19    0.85   1 
  -4  -6   0    8.14    1.63   1 
  -4  -6  -1   24.12    2.45   1 
  -4  -6  -2    0.07    0.85   1 
  -4  -6  -3   96.93    4.81   1 
  -4  -6  -4   22.01    2.47   1 
  -4  -6  -5   44.31    3.49   1 
  -4  -6  -6   45.91    3.66   1 
  -4  -6  -7    4.77    1.74   1 
  -4  -6  -8   10.31    2.34   1 
  -4  -6  -9    0.52    1.39   1 
  -4  -6 -10   25.79    3.51   1 
  -4  -6 -11   13.91    2.79   1 
  -4  -6 -12   32.27    3.72   1 
  -4  -6 -13   17.71    3.32   1 
  -4  -6 -14  120.01    7.27   1 
  -4  -6 -15    0.96    1.64   1 
  -4  -6 -16   57.59    5.45   1 
  -4  -6 -17    0.95    1.76   1 
  -4  -6 -18   64.34    5.90   1 
  -4  -6 -19    6.45    2.81   1 
  -4  -6 -20   50.46    5.61   1 
  -4  -6 -21   20.15    4.21   1 
   4   7 -30    1.75    2.55   1 
   4   7 -29    1.01    2.17   1 
   4   7 -28    0.96    2.01   1 
   4   7 -27    6.45    2.41   1 
   4   7 -26    6.41    2.26   1 
   4   7 -25    0.41    1.66   1 
   4   7 -24   19.82    3.16   1 
   4   7 -23    1.67    1.52   1 
   4   7 -22   35.82    3.66   1 
   4   7 -21    1.99    1.40   1 
   4   7 -20   22.31    2.84   1 
   4   7 -19   21.77    2.61   1 
   4   7 -18    9.41    1.84   1 
   4   7 -17   25.75    2.59   1 
   4   7 -16   30.58    2.80   1 
   4   7 -15    1.39    0.98   1 
   4   7 -14  100.24    4.51   1 
   4   7 -13    5.28    1.29   1 
   4   7 -12   11.50    1.69   1 
   4   7 -11  418.25    8.60   1 
   4   7 -10   24.70    2.11   1 
   4   7  -9   99.00    3.98   1 
   4   7  -8   93.49    3.82   1 
   4   7  -7    4.87    1.11   1 
   4   7  -6    1.79    0.84   1 
   4   7  -5   12.25    1.61   1 
   4   7  -4  151.88    5.06   1 
   4   7  -3   24.52    2.12   1 
  -4  -7   2  319.04    8.01   1 
  -4  -7   1    7.86    1.60   1 
  -4  -7   0   44.61    3.15   1 
  -4  -7  -1    2.69    1.12   1 
  -4  -7  -2    2.84    1.16   1 
  -4  -7  -3   30.53    2.84   1 
  -4  -7  -4   63.44    4.14   1 
  -4  -7  -5    0.25    1.10   1 
  -4  -7  -6  262.25    8.71   1 
  -4  -7  -7   55.88    4.33   1 
  -4  -7  -8   93.15    5.62   1 
  -4  -7  -9  121.81    6.54   1 
  -4  -7 -10   33.29    3.78   1 
  -4  -7 -11    0.48    1.47   1 
  -4  -7 -12   24.61    3.62   1 
  -4  -7 -13    9.50    2.62   1 
  -4  -7 -14   39.20    4.26   1 
  -4  -7 -15    6.24    2.51   1 
  -4  -7 -16   91.52    6.66   1 
  -4  -7 -17    3.28    2.41   1 
  -4  -7 -18   31.13    4.57   1 
  -4  -7 -19    4.25    2.54   1 
  -4  -7 -20    1.74    2.57   1 
   4   8 -29    3.22    2.31   1 
   4   8 -28   16.12    3.49   1 
   4   8 -27   14.37    3.23   1 
   4   8 -26  114.23    6.86   1 
   4   8 -25    5.65    2.27   1 
   4   8 -24  139.86    7.12   1 
   4   8 -23    0.33    1.32   1 
   4   8 -22   38.31    3.63   1 
   4   8 -21    4.32    1.55   1 
   4   8 -20    1.31    1.22   1 
   4   8 -19    4.20    1.43   1 
   4   8 -18   15.71    2.32   1 
   4   8 -17   47.25    3.40   1 
   4   8 -16  118.09    5.11   1 
   4   8 -15   73.14    3.96   1 
   4   8 -14   41.91    2.97   1 
   4   8 -13   22.34    2.16   1 
   4   8 -12    6.09    1.34   1 
   4   8 -11   94.34    4.03   1 
   4   8 -10  172.92    5.37   1 
   4   8  -9    4.70    1.15   1 
   4   8  -8    8.29    1.37   1 
   4   8  -7    0.42    0.71   1 
   4   8  -6  100.18    4.05   1 
   4   8  -5   67.96    3.41   1 
   4   8  -4    6.00    1.31   1 
  -4  -8   3  188.51    6.16   1 
  -4  -8   2   91.13    4.36   1 
  -4  -8   1   45.20    3.16   1 
  -4  -8   0    7.67    1.58   1 
  -4  -8  -1    0.57    0.94   1 
  -4  -8  -2   21.84    2.51   1 
  -4  -8  -3    0.84    1.02   1 
  -4  -8  -4   11.57    2.22   1 
  -4  -8  -5    1.58    1.30   1 
  -4  -8  -6   33.48    3.36   1 
  -4  -8  -7   11.15    2.33   1 
  -4  -8  -8    0.27    1.40   1 
  -4  -8  -9    5.77    1.95   1 
  -4  -8 -10    7.37    2.29   1 
  -4  -8 -11   -0.04    1.50   1 
  -4  -8 -12   53.33    4.92   1 
  -4  -8 -13    1.03    1.74   1 
  -4  -8 -14    9.88    2.64   1 
  -4  -8 -15    2.17    2.07   1 
  -4  -8 -16    4.02    2.37   1 
  -4  -8 -17    4.74    2.45   1 
  -4  -8 -18   13.30    3.38   1 
  -4  -8 -19    9.02    3.28   1 
   4   9 -27    0.39    1.76   1 
   4   9 -26   10.65    2.68   1 
   4   9 -25   -0.46    1.51   1 
   4   9 -24    3.48    1.77   1 
   4   9 -23   52.35    4.23   1 
   4   9 -22   28.64    3.13   1 
   4   9 -21   99.11    5.34   1 
   4   9 -20   21.71    2.85   1 
   4   9 -19  119.56    5.56   1 
   4   9 -18   20.34    2.40   1 
   4   9 -17   52.66    3.57   1 
   4   9 -16   17.35    2.13   1 
   4   9 -15   56.18    3.40   1 
   4   9 -14   -0.20    0.79   1 
   4   9 -13  229.96    6.48   1 
   4   9 -12    4.56    1.18   1 
   4   9 -11  325.81    7.43   1 
   4   9 -10  220.76    6.05   1 
   4   9  -9   49.97    2.93   1 
   4   9  -8  161.87    5.14   1 
   4   9  -7   12.68    1.71   1 
   4   9  -6    0.70    0.75   1 
   4   9  -5  187.25    5.71   1 
  -4  -9   4   14.90    2.02   1 
  -4  -9   3  188.72    6.26   1 
  -4  -9   2   15.04    2.08   1 
  -4  -9   1   10.03    1.86   1 
  -4  -9   0    1.27    1.06   1 
  -4  -9  -1   11.44    2.03   1 
  -4  -9  -2    4.68    1.58   1 
  -4  -9  -3   60.92    4.16   1 
  -4  -9  -4   10.92    2.19   1 
  -4  -9  -5    0.52    1.27   1 
  -4  -9  -6    0.99    1.31   1 
  -4  -9  -7   36.89    3.76   1 
  -4  -9  -8   -0.01    1.21   1 
  -4  -9  -9   -0.02    1.45   1 
  -4  -9 -10    0.16    1.52   1 
  -4  -9 -11   11.66    2.81   1 
  -4  -9 -12   16.79    3.24   1 
  -4  -9 -13   15.41    3.13   1 
  -4  -9 -14   34.80    4.31   1 
  -4  -9 -15    3.61    2.27   1 
  -4  -9 -16   10.45    3.18   1 
  -4  -9 -17   -1.82    1.88   1 
  -4  -9 -18    1.06    2.25   1 
  -4  -9 -19    0.52    2.20   1 
   4  10 -25   16.53    2.92   1 
   4  10 -24   10.02    2.28   1 
   4  10 -23    1.46    1.41   1 
   4  10 -22    3.45    1.58   1 
   4  10 -21   31.46    3.16   1 
   4  10 -20    0.43    1.06   1 
   4  10 -19  119.28    5.49   1 
   4  10 -18   56.94    3.74   1 
   4  10 -17   59.89    3.66   1 
   4  10 -16   74.71    4.01   1 
   4  10 -15    5.55    1.39   1 
   4  10 -14    0.41    0.82   1 
   4  10 -13   29.97    2.36   1 
   4  10 -12    7.58    1.46   1 
   4  10 -11   40.21    2.66   1 
   4  10 -10   15.31    1.74   1 
   4  10  -9   21.47    2.03   1 
   4  10  -8  280.38    6.87   1 
   4  10  -7  113.75    4.40   1 
   4  10  -6   37.81    2.67   1 
  -4 -10   5  232.35    6.92   1 
  -4 -10   4    2.66    1.17   1 
  -4 -10   3   63.84    3.78   1 
  -4 -10   2   10.31    1.91   1 
  -4 -10   1   16.45    2.30   1 
  -4 -10   0   31.86    2.94   1 
  -4 -10  -1   54.39    3.87   1 
  -4 -10  -2    9.92    2.05   1 
  -4 -10  -3  107.76    5.58   1 
  -4 -10  -4    6.23    1.85   1 
  -4 -10  -5   91.68    5.53   1 
  -4 -10  -6   -0.21    1.37   1 
  -4 -10  -7    2.59    1.75   1 
  -4 -10  -8   25.66    3.50   1 
  -4 -10  -9    0.67    1.41   1 
  -4 -10 -10   43.01    4.39   1 
  -4 -10 -11    8.88    2.73   1 
  -4 -10 -12    4.98    2.12   1 
  -4 -10 -13   12.27    3.13   1 
  -4 -10 -14    1.79    2.03   1 
  -4 -10 -15   -0.32    2.03   1 
  -4 -10 -16    4.43    2.62   1 
  -4 -10 -17    4.14    2.55   1 
  -4 -10 -18   13.21    3.81   1 
   4  11 -23   35.12    3.46   1 
   4  11 -22    1.07    1.34   1 
   4  11 -21   22.22    2.86   1 
   4  11 -20   20.96    2.56   1 
   4  11 -19   90.30    4.74   1 
   4  11 -18    1.01    1.10   1 
   4  11 -17  104.01    4.76   1 
   4  11 -16   40.71    2.99   1 
   4  11 -15   91.58    4.22   1 
   4  11 -14   47.39    3.01   1 
   4  11 -13  183.05    5.66   1 
   4  11 -12   -0.59    0.78   1 
   4  11 -11   22.19    2.02   1 
   4  11 -10    7.32    1.36   1 
   4  11  -9   12.10    1.69   1 
   4  11  -8    2.50    1.03   1 
   4  11  -7  265.81    6.85   1 
  -4 -11   6   73.51    3.96   1 
  -4 -11   5  362.55    8.75   1 
  -4 -11   4   13.10    2.05   1 
  -4 -11   3  252.81    7.66   1 
  -4 -11   2    1.25    1.11   1 
  -4 -11   1   62.40    4.00   1 
  -4 -11   0    5.60    1.62   1 
  -4 -11  -1    2.50    1.37   1 
  -4 -11  -2    2.70    1.42   1 
  -4 -11  -3   11.29    2.32   1 
  -4 -11  -4    6.73    2.02   1 
  -4 -11  -5   19.79    3.03   1 
  -4 -11  -6    4.13    1.92   1 
  -4 -11  -7    1.43    1.64   1 
  -4 -11  -8   71.52    5.50   1 
  -4 -11  -9    1.08    1.86   1 
  -4 -11 -10    1.83    1.68   1 
  -4 -11 -11    1.49    1.94   1 
  -4 -11 -12    1.98    2.01   1 
  -4 -11 -13    1.18    2.00   1 
  -4 -11 -14    1.01    1.97   1 
  -4 -11 -15    0.14    1.95   1 
  -4 -11 -16   26.12    4.48   1 
  -4 -11 -17    0.24    2.10   1 
   4  12 -21  134.08    5.98   1 
   4  12 -20    0.06    1.20   1 
   4  12 -19   69.21    4.14   1 
   4  12 -18   12.08    1.97   1 
   4  12 -17    0.53    0.96   1 
   4  12 -16    2.03    1.15   1 
   4  12 -15    2.59    1.10   1 
   4  12 -14    5.12    1.30   1 
   4  12 -13    0.55    0.78   1 
   4  12 -12    0.08    0.82   1 
   4  12 -11   53.03    3.01   1 
   4  12 -10   41.50    2.71   1 
   4  12  -9   32.28    2.45   1 
   4  12  -8    1.80    0.94   1 
  -4 -12   7   25.23    2.54   1 
  -4 -12   6    0.49    1.10   1 
  -4 -12   5   19.26    2.36   1 
  -4 -12   4   17.00    2.30   1 
  -4 -12   3    4.47    1.45   1 
  -4 -12   2   35.36    3.13   1 
  -4 -12   1   -0.26    1.02   1 
  -4 -12   0   46.50    3.70   1 
  -4 -12  -1   37.57    3.41   1 
  -4 -12  -2   36.12    3.47   1 
  -4 -12  -3   79.04    5.16   1 
  -4 -12  -4   29.39    3.40   1 
  -4 -12  -5    8.41    2.29   1 
  -4 -12  -6   34.91    3.81   1 
  -4 -12  -7    4.10    1.92   1 
  -4 -12  -8   46.96    4.59   1 
  -4 -12  -9   21.76    3.68   1 
  -4 -12 -10   51.90    5.03   1 
  -4 -12 -11   24.16    3.90   1 
  -4 -12 -12   15.59    3.47   1 
  -4 -12 -13    0.34    2.02   1 
  -4 -12 -14    3.52    2.45   1 
  -4 -12 -15    2.86    2.36   1 
  -4 -12 -16   12.12    3.51   1 
   4  13 -19    0.40    1.13   1 
   4  13 -18   76.88    4.06   1 
   4  13 -17   55.04    3.40   1 
   4  13 -16   72.12    3.73   1 
   4  13 -15   40.23    2.81   1 
   4  13 -14   18.75    2.00   1 
   4  13 -13    0.86    0.91   1 
   4  13 -12   11.59    1.71   1 
   4  13 -11    0.01    0.84   1 
   4  13 -10  140.52    4.90   1 
  -4 -13   9   -0.39    1.01   1 
  -4 -13   8  302.28    7.97   1 
  -4 -13   7   67.23    3.88   1 
  -4 -13   6   91.90    4.59   1 
  -4 -13   5   31.22    2.87   1 
  -4 -13   4    0.92    1.04   1 
  -4 -13   3    8.26    1.80   1 
  -4 -13   2   20.19    2.67   1 
  -4 -13   1    0.98    1.23   1 
  -4 -13   0  151.29    6.58   1 
  -4 -13  -1   45.34    3.84   1 
  -4 -13  -2  248.26    8.94   1 
  -4 -13  -3   33.61    3.59   1 
  -4 -13  -4   23.25    3.34   1 
  -4 -13  -5   -0.96    1.46   1 
  -4 -13  -6    9.21    2.54   1 
  -4 -13  -7   -0.02    1.56   1 
  -4 -13  -8    0.29    1.74   1 
  -4 -13  -9    6.10    2.39   1 
  -4 -13 -10    5.76    2.32   1 
  -4 -13 -11    2.22    2.16   1 
  -4 -13 -12   -0.40    1.83   1 
  -4 -13 -13   13.61    3.41   1 
  -4 -13 -14   22.65    4.12   1 
  -4 -13 -15    3.30    2.57   1 
   4  14 -16   16.30    1.92   1 
   4  14 -15   39.22    2.71   1 
   4  14 -14    0.26    0.90   1 
   4  14 -13   48.20    2.93   1 
   4  14 -12    2.04    1.01   1 
   4  14 -11   26.02    2.24   1 
  -4 -14  10   18.39    2.29   1 
  -4 -14   9    0.31    1.04   1 
  -4 -14   8    1.86    1.24   1 
  -4 -14   7    2.39    1.40   1 
  -4 -14   6   -0.03    0.97   1 
  -4 -14   5   75.14    4.30   1 
  -4 -14   4    9.69    1.93   1 
  -4 -14   3   44.53    3.52   1 
  -4 -14   2   21.89    2.82   1 
  -4 -14   1    0.22    1.19   1 
  -4 -14   0    6.38    1.95   1 
  -4 -14  -1    1.00    1.40   1 
  -4 -14  -2    9.79    2.32   1 
  -4 -14  -3    1.16    1.57   1 
  -4 -14  -4   71.06    5.31   1 
  -4 -14  -5   30.82    3.81   1 
  -4 -14  -6   82.62    5.95   1 
  -4 -14  -7    4.04    2.14   1 
  -4 -14  -8  137.86    7.94   1 
  -4 -14  -9    5.60    2.39   1 
  -4 -14 -10   89.00    6.82   1 
  -4 -14 -11    2.45    2.11   1 
  -4 -14 -12   28.89    4.50   1 
  -4 -14 -13   41.01    5.27   1 
  -4 -14 -14   24.21    4.46   1 
   4  15 -13    1.74    1.04   1 
   4  15 -12   41.46    2.73   1 
  -4 -15  11    1.60    1.28   1 
  -4 -15  10   59.99    3.67   1 
  -4 -15   9    2.21    1.29   1 
  -4 -15   8   29.86    2.80   1 
  -4 -15   7   40.02    3.18   1 
  -4 -15   6    1.32    1.24   1 
  -4 -15   5    1.55    1.29   1 
  -4 -15   4    0.18    1.21   1 
  -4 -15   3    0.58    1.28   1 
  -4 -15   2  131.05    6.12   1 
  -4 -15   1    0.33    1.34   1 
  -4 -15   0  162.94    7.27   1 
  -4 -15  -1   46.15    4.11   1 
  -4 -15  -2   71.15    5.14   1 
  -4 -15  -3    1.24    1.78   1 
  -4 -15  -4   18.62    3.28   1 
  -4 -15  -5    9.69    2.63   1 
  -4 -15  -6    6.43    2.42   1 
  -4 -15  -7    4.57    2.16   1 
  -4 -15  -8   31.62    4.35   1 
  -4 -15  -9    0.81    2.02   1 
  -4 -15 -10    8.79    2.78   1 
  -4 -15 -11   14.94    3.57   1 
  -4 -15 -12    0.14    2.07   1 
  -4 -15 -13   14.97    3.70   1 
  -4 -16  12    3.78    1.43   1 
  -4 -16  11    8.26    1.81   1 
  -4 -16  10   -0.34    1.19   1 
  -4 -16   9   32.56    2.88   1 
  -4 -16   8    8.73    1.86   1 
  -4 -16   7    4.65    1.57   1 
  -4 -16   6   -0.42    1.17   1 
  -4 -16   5    0.47    1.29   1 
  -4 -16   4   29.78    3.09   1 
  -4 -16   3   11.62    2.32   1 
  -4 -16   2    7.86    2.15   1 
  -4 -16   1   20.94    3.10   1 
  -4 -16   0   -0.10    1.53   1 
  -4 -16  -1    0.57    1.64   1 
  -4 -16  -2    1.00    1.64   1 
  -4 -16  -3   21.98    3.46   1 
  -4 -16  -4   26.65    3.80   1 
  -4 -16  -5    6.17    2.42   1 
  -4 -16  -6   21.19    3.67   1 
  -4 -16  -7    5.92    2.51   1 
  -4 -16  -8   15.10    3.40   1 
  -4 -16  -9    5.60    2.54   1 
  -4 -16 -10   13.47    3.47   1 
  -4 -16 -11   27.94    4.53   1 
  -4 -16 -12    6.40    2.94   1 
  -4 -17  10   54.06    3.63   1 
  -4 -17   9   32.01    2.95   1 
  -4 -17   8    1.06    1.41   1 
  -4 -17   7    4.65    1.62   1 
  -4 -17   6   29.77    3.07   1 
  -4 -17   5   32.60    3.17   1 
  -4 -17   4   27.58    3.01   1 
  -4 -17   3   11.59    2.41   1 
  -4 -17   2   39.48    3.84   1 
  -4 -17   1    0.75    1.54   1 
  -4 -17   0    4.01    2.06   1 
  -4 -17  -1    0.42    1.58   1 
  -4 -17  -2    0.58    1.65   1 
  -4 -17  -3   23.43    3.62   1 
  -4 -17  -4    4.24    2.21   1 
  -4 -17  -5   57.16    5.20   1 
  -4 -17  -6   25.92    4.03   1 
  -4 -17  -7   31.91    4.61   1 
  -4 -17  -8    1.33    2.11   1 
  -4 -17  -9    2.61    2.50   1 
  -4 -17 -10    4.98    2.67   1 
  -4 -17 -11    1.59    2.41   1 
  -4 -18   7    4.25    1.71   1 
  -4 -18   6   20.77    2.85   1 
  -4 -18   5   38.08    3.54   1 
  -4 -18   4   24.16    3.21   1 
  -4 -18   3   49.42    4.20   1 
  -4 -18   2    7.56    2.35   1 
  -4 -18   1    1.74    1.82   1 
  -4 -18   0   24.83    3.66   1 
  -4 -18  -1    0.79    1.76   1 
  -4 -18  -2   16.13    3.21   1 
  -4 -18  -3    0.88    2.02   1 
  -4 -18  -4   14.46    3.09   1 
  -4 -18  -5    2.16    2.20   1 
  -4 -18  -6    1.37    2.18   1 
  -4 -18  -7    1.36    2.30   1 
  -4 -18  -8    4.66    2.58   1 
  -4 -18  -9   14.15    3.58   1 
  -4 -19   4    9.57    2.34   1 
  -4 -19   3   10.72    2.64   1 
  -4 -19   2   -0.77    1.56   1 
  -4 -19   1    9.01    2.56   1 
  -4 -19   0   10.88    2.67   1 
  -4 -19  -1    1.59    2.12   1 
  -4 -19  -2   14.58    3.17   1 
  -4 -19  -3    1.75    2.07   1 
  -4 -19  -4    0.39    2.03   1 
  -4 -19  -5   -0.24    2.10   1 
  -4 -19  -6    0.38    2.33   1 
  -4 -19  -7    6.35    2.69   1 
  -4 -19  -8   16.82    3.80   1 
  -4 -20   1    1.08    1.92   1 
  -4 -20   0   87.96    6.12   1 
  -4 -20  -1    0.14    1.99   1 
  -4 -20  -2   75.43    5.96   1 
  -4 -20  -3   -0.68    2.16   1 
  -4 -20  -4   35.71    4.80   1 
  -4 -20  -5    0.51    2.12   1 
  -4 -20  -6    3.02    2.44   1 
  -4 -20  -7    8.60    3.18   1 
  -4 -21  -4   -1.02    2.10   1 
  -4 -21  -5   54.96    5.59   1 
   5 -18 -13    2.20    2.62   1 
   5 -18 -12    0.02    2.26   1 
   5 -18 -11   14.68    3.47   1 
   5 -18 -10   18.73    3.55   1 
   5 -18  -9   55.79    5.24   1 
   5 -18  -8   64.55    5.23   1 
   5 -18  -7   32.50    3.80   1 
   5 -18  -6   19.94    3.07   1 
   5 -17 -14    0.85    2.58   1 
   5 -17 -13   51.80    5.66   1 
   5 -17 -12    0.24    2.11   1 
   5 -17 -11    2.60    2.32   1 
   5 -17 -10   51.82    5.09   1 
   5 -17  -9    0.43    1.87   1 
   5 -17  -8    6.30    2.28   1 
   5 -17  -7    9.39    2.37   1 
   5 -17  -6   13.70    2.73   1 
   5 -17  -5   25.88    3.13   1 
   5 -17  -4   66.73    4.61   1 
   5 -17  -3    7.98    2.01   1 
   5 -16 -15   -0.79    2.16   1 
   5 -16 -14    2.79    2.50   1 
   5 -16 -13    0.33    1.98   1 
   5 -16 -12   34.04    4.57   1 
   5 -16 -11   16.37    3.40   1 
   5 -16 -10   70.25    5.74   1 
   5 -16  -9   43.17    4.45   1 
   5 -16  -8   71.89    5.42   1 
   5 -16  -7    9.11    2.40   1 
   5 -16  -6   47.79    4.14   1 
   5 -16  -5    8.05    2.03   1 
   5 -16  -4  125.14    6.07   1 
   5 -16  -3    1.17    1.29   1 
   5 -16  -2  134.79    5.85   1 
   5 -16  -1   14.15    2.18   1 
   5 -16   0   71.09    4.09   1 
   5 -15 -16    0.77    2.48   1 
   5 -15 -15   19.71    3.98   1 
   5 -15 -14    4.96    2.51   1 
   5 -15 -13    1.62    1.93   1 
   5 -15 -12   20.98    3.68   1 
   5 -15 -11    1.86    1.90   1 
   5 -15 -10   68.46    5.44   1 
   5 -15  -9    2.45    1.77   1 
   5 -15  -8    0.56    1.56   1 
   5 -15  -7   30.63    3.45   1 
   5 -15  -6    6.56    1.93   1 
   5 -15  -5    4.08    1.64   1 
   5 -15  -4   19.14    2.68   1 
   5 -15  -3   -0.81    1.11   1 
   5 -15  -2    0.78    1.23   1 
   5 -15  -1    3.40    1.38   1 
   5 -15   0    0.19    1.02   1 
   5 -15   1   66.00    3.76   1 
   5 -15   2   17.62    2.05   1 
   5 -14 -17   -1.10    2.15   1 
   5 -14 -16   -1.11    2.18   1 
   5 -14 -15    0.91    2.04   1 
   5 -14 -14   19.70    3.86   1 
   5 -14 -13    1.00    1.87   1 
   5 -14 -12   20.76    3.65   1 
   5 -14 -11    0.47    1.63   1 
   5 -14 -10   11.21    2.65   1 
   5 -14  -9   -0.22    1.34   1 
   5 -14  -8   14.68    2.80   1 
   5 -14  -7    2.16    1.49   1 
   5 -14  -6   78.89    4.96   1 
   5 -14  -5    3.84    1.58   1 
   5 -14  -4  166.26    6.71   1 
   5 -14  -3    0.41    1.10   1 
   5 -14  -2  205.64    6.93   1 
   5 -14  -1   24.45    2.52   1 
   5 -14   0   34.72    2.80   1 
   5 -14   1   88.82    4.15   1 
   5 -14   2   27.82    2.40   1 
   5 -14   3   39.46    2.61   1 
   5 -14   4  107.06    3.97   1 
   5 -13 -18    2.24    2.66   1 
   5 -13 -17   -0.83    2.15   1 
   5 -13 -16    0.05    2.08   1 
   5 -13 -15    0.97    1.90   1 
   5 -13 -14   15.98    3.44   1 
   5 -13 -13    9.74    2.72   1 
   5 -13 -12   33.97    4.12   1 
   5 -13 -11   -0.20    1.43   1 
   5 -13 -10    1.83    1.64   1 
   5 -13  -9    4.12    1.83   1 
   5 -13  -8    0.72    1.39   1 
   5 -13  -7    0.63    1.19   1 
   5 -13  -6    0.06    1.19   1 
   5 -13  -5   34.02    3.18   1 
   5 -13  -4    1.46    1.11   1 
   5 -13  -3    0.43    0.98   1 
   5 -13  -2   10.23    1.84   1 
   5 -13  -1  113.30    4.98   1 
   5 -13   0    0.07    0.89   1 
   5 -13   1  121.76    4.81   1 
   5 -13   2    8.20    1.52   1 
   5 -13   3    0.30    0.82   1 
   5 -13   4   -0.15    0.81   1 
   5 -13   5   -0.56    0.74   1 
   5 -13   6    8.78    1.33   1 
   5 -13   7  103.50    3.52   1 
   5 -12 -19   34.32    5.39   1 
   5 -12 -18   -0.20    2.27   1 
   5 -12 -17   24.55    4.58   1 
   5 -12 -16    5.74    2.73   1 
   5 -12 -15   45.64    5.05   1 
   5 -12 -14   14.84    3.34   1 
   5 -12 -13   22.51    3.72   1 
   5 -12 -12   14.39    2.93   1 
   5 -12 -11    0.32    1.35   1 
   5 -12 -10   -0.16    1.30   1 
   5 -12  -9    4.72    1.84   1 
   5 -12  -8    0.86    1.27   1 
   5 -12  -7   12.69    2.40   1 
   5 -12  -6    1.37    1.20   1 
   5 -12  -5   45.21    3.54   1 
   5 -12  -4   49.16    3.61   1 
   5 -12  -3    0.43    0.96   1 
   5 -12  -2    0.01    0.89   1 
   5 -12  -1    3.89    1.27   1 
   5 -12   0   22.22    2.28   1 
   5 -12   1   45.26    2.92   1 
   5 -12   2  116.52    4.40   1 
   5 -12   3    3.47    1.08   1 
   5 -12   4   41.23    2.50   1 
   5 -12   5   -0.24    0.74   1 
   5 -12   6    6.99    1.28   1 
   5 -12   7   -0.30    0.75   1 
   5 -11 -20    7.25    3.23   1 
   5 -11 -19    0.27    2.10   1 
   5 -11 -18   17.30    4.05   1 
   5 -11 -17   10.65    3.34   1 
   5 -11 -16    2.46    2.24   1 
   5 -11 -15    9.25    2.85   1 
   5 -11 -14    8.08    2.57   1 
   5 -11 -13    2.73    1.82   1 
   5 -11 -12   14.44    2.92   1 
   5 -11 -11    2.68    1.67   1 
   5 -11 -10   76.66    5.25   1 
   5 -11  -9    6.47    1.90   1 
   5 -11  -8   53.82    4.22   1 
   5 -11  -7  143.99    6.50   1 
   5 -11  -6   10.82    2.08   1 
   5 -11  -5   55.24    3.80   1 
   5 -11  -4    6.43    1.63   1 
   5 -11  -3    0.05    0.80   1 
   5 -11  -2    3.67    1.24   1 
   5 -11  -1    1.62    1.03   1 
   5 -11   0   81.94    3.91   1 
   5 -11   1    2.71    1.04   1 
   5 -11   2  106.27    4.12   1 
   5 -11   3   30.37    2.22   1 
   5 -11   4   32.62    2.24   1 
   5 -11   5    2.62    0.94   1 
   5 -11   6   35.04    2.27   1 
   5 -11   7   30.46    2.11   1 
  -5  11  -8    8.14    1.52   1 
  -5  11  -9   11.38    1.72   1 
  -5  11 -10   11.22    1.67   1 
   5 -10 -21   27.63    5.16   1 
   5 -10 -20    0.16    2.41   1 
   5 -10 -19   46.12    5.68   1 
   5 -10 -18   39.59    5.40   1 
   5 -10 -17   43.50    5.16   1 
   5 -10 -16   43.67    4.96   1 
   5 -10 -15   41.54    4.77   1 
   5 -10 -14   22.12    3.71   1 
   5 -10 -13   10.41    2.58   1 
   5 -10 -12   20.30    3.31   1 
   5 -10 -11   12.47    2.56   1 
   5 -10 -10    3.41    1.66   1 
   5 -10  -9   40.48    3.75   1 
   5 -10  -8   11.43    2.20   1 
   5 -10  -7   69.68    4.44   1 
   5 -10  -6    0.98    1.01   1 
   5 -10  -5   55.54    3.77   1 
   5 -10  -4   23.85    2.45   1 
   5 -10  -3    6.43    1.47   1 
   5 -10  -2    0.85    0.92   1 
   5 -10  -1    5.62    1.30   1 
   5 -10   0   53.03    3.14   1 
   5 -10   1   -0.13    0.71   1 
   5 -10   2   72.64    3.37   1 
   5 -10   3    0.15    0.68   1 
   5 -10   4   30.58    2.18   1 
   5 -10   5    0.34    0.71   1 
   5 -10   6  165.28    4.73   1 
   5 -10   7   31.31    2.26   1 
  -5  10  -8   20.79    2.04   1 
  -5  10  -9   15.55    1.91   1 
  -5  10 -10   15.52    1.86   1 
  -5  10 -11    2.00    1.14   1 
  -5  10 -12    8.10    1.64   1 
  -5  10 -13   25.64    2.45   1 
  -5  10 -14   13.00    2.07   1 
   5  -9 -22    2.54    2.73   1 
   5  -9 -21   10.64    3.59   1 
   5  -9 -20    3.90    2.58   1 
   5  -9 -19    2.03    2.34   1 
   5  -9 -18    0.37    2.10   1 
   5  -9 -17   13.28    3.21   1 
   5  -9 -16   15.05    3.22   1 
   5  -9 -15   11.70    3.03   1 
   5  -9 -14    3.96    2.03   1 
   5  -9 -13   44.35    4.47   1 
   5  -9 -12   87.73    5.82   1 
   5  -9 -11   16.04    2.76   1 
   5  -9 -10  106.11    6.04   1 
   5  -9  -9   26.99    3.11   1 
   5  -9  -8   21.07    2.77   1 
   5  -9  -7    8.32    1.87   1 
   5  -9  -6    8.03    1.70   1 
   5  -9  -5    1.44    1.09   1 
   5  -9  -4  165.03    5.97   1 
   5  -9  -3    1.82    0.98   1 
   5  -9  -2  351.26    8.32   1 
   5  -9  -1    3.39    1.15   1 
   5  -9   0  333.05    7.65   1 
   5  -9   1   16.11    1.79   1 
   5  -9   2   42.71    2.56   1 
   5  -9   3    0.70    0.75   1 
   5  -9   4   60.99    2.96   1 
   5  -9   5   26.98    2.07   1 
   5  -9   6  134.91    4.36   1 
  -5   9  -7    4.75    1.28   1 
  -5   9  -8  120.15    4.52   1 
  -5   9  -9   28.12    2.34   1 
  -5   9 -10  107.24    4.36   1 
  -5   9 -11   17.97    2.20   1 
  -5   9 -12    9.03    1.73   1 
  -5   9 -13   81.64    4.15   1 
  -5   9 -14    0.98    1.16   1 
  -5   9 -15   20.83    2.66   1 
  -5   9 -16    0.48    1.28   1 
   5  -8 -23    0.68    2.76   1 
   5  -8 -22    2.61    2.59   1 
   5  -8 -21    1.12    2.44   1 
   5  -8 -20   33.07    5.16   1 
   5  -8 -19   14.73    3.54   1 
   5  -8 -18   64.27    6.17   1 
   5  -8 -17   13.36    3.25   1 
   5  -8 -16   29.14    4.32   1 
   5  -8 -15    5.34    2.18   1 
   5  -8 -14   71.45    5.61   1 
   5  -8 -13    0.47    1.32   1 
   5  -8 -12   92.44    5.76   1 
   5  -8 -11    3.61    1.62   1 
   5  -8 -10  125.17    6.40   1 
   5  -8  -9    2.04    1.26   1 
   5  -8  -8   27.83    2.89   1 
   5  -8  -7   58.45    3.86   1 
   5  -8  -6   18.54    2.25   1 
   5  -8  -5   70.92    4.00   1 
   5  -8  -4    5.41    1.36   1 
   5  -8  -3   12.09    1.82   1 
   5  -8  -2  234.12    6.65   1 
   5  -8  -1   21.59    2.12   1 
   5  -8   0  200.13    5.79   1 
   5  -8   1   62.27    3.16   1 
   5  -8   2   -0.27    0.66   1 
   5  -8   3    5.07    1.10   1 
   5  -8   4   51.18    2.72   1 
   5  -8   5    0.80    0.72   1 
   5  -8   6   11.93    1.58   1 
  -5   8  -7    5.83    1.41   1 
  -5   8  -8    2.54    1.08   1 
  -5   8  -9   10.09    1.75   1 
  -5   8 -10   38.72    2.86   1 
  -5   8 -11  166.12    5.78   1 
  -5   8 -12   95.80    4.59   1 
  -5   8 -13   53.76    3.59   1 
  -5   8 -14   59.23    3.86   1 
  -5   8 -15   54.76    3.95   1 
  -5   8 -16    6.03    1.84   1 
  -5   8 -17    0.98    1.45   1 
  -5   8 -18    1.09    1.45   1 
  -5   8 -19   23.33    3.16   1 
   5  -7 -23   11.57    3.70   1 
   5  -7 -22    3.08    2.45   1 
   5  -7 -21    0.86    2.30   1 
   5  -7 -20    5.03    2.59   1 
   5  -7 -19   20.24    4.02   1 
   5  -7 -18    9.46    2.81   1 
   5  -7 -17    0.01    1.53   1 
   5  -7 -16    0.50    1.63   1 
   5  -7 -15   17.95    3.31   1 
   5  -7 -14    5.53    2.06   1 
   5  -7 -13   49.79    4.41   1 
   5  -7 -12   25.46    3.35   1 
   5  -7 -11    0.45    1.16   1 
   5  -7 -10   13.85    2.44   1 
   5  -7  -9    0.69    0.92   1 
   5  -7  -8    0.43    0.98   1 
   5  -7  -7   45.06    3.40   1 
   5  -7  -6   17.44    2.24   1 
   5  -7  -5  157.61    5.80   1 
   5  -7  -4  104.89    4.64   1 
   5  -7  -3   22.08    2.18   1 
   5  -7  -2  261.84    6.88   1 
   5  -7  -1   41.08    2.71   1 
   5  -7   0  178.31    5.40   1 
   5  -7   1   53.41    2.86   1 
   5  -7   2   34.19    2.33   1 
   5  -7   3  170.27    5.07   1 
   5  -7   4  143.40    4.62   1 
   5  -7   5  103.81    3.96   1 
   5  -7   6  170.09    5.12   1 
  -5   7  -7    0.40    0.88   1 
  -5   7  -8  157.94    5.42   1 
  -5   7  -9   32.90    2.67   1 
  -5   7 -10   50.05    3.27   1 
  -5   7 -11  161.68    5.89   1 
  -5   7 -12    0.68    1.15   1 
  -5   7 -13   75.73    4.27   1 
  -5   7 -14    5.83    1.66   1 
  -5   7 -15   21.66    2.83   1 
  -5   7 -16    4.24    1.76   1 
  -5   7 -17    1.19    1.39   1 
  -5   7 -18    1.42    1.55   1 
  -5   7 -19    1.20    1.66   1 
  -5   7 -20    3.48    1.86   1 
  -5   7 -21    0.43    1.70   1 
   5  -6 -24    0.17    2.47   1 
   5  -6 -23    1.99    2.44   1 
   5  -6 -22    2.38    2.33   1 
   5  -6 -21    0.05    1.98   1 
   5  -6 -20   41.89    5.44   1 
   5  -6 -19    1.25    1.72   1 
   5  -6 -18   17.84    3.42   1 
   5  -6 -17   -0.06    1.56   1 
   5  -6 -16    1.32    1.63   1 
   5  -6 -15   14.67    2.85   1 
   5  -6 -14   66.37    5.10   1 
   5  -6 -13   15.86    2.79   1 
   5  -6 -12  184.91    7.91   1 
   5  -6 -11    5.63    1.76   1 
   5  -6 -10  159.58    6.78   1 
   5  -6  -9    0.93    0.92   1 
   5  -6  -8   20.20    2.41   1 
   5  -6  -7   44.77    3.32   1 
   5  -6  -6    2.36    1.07   1 
   5  -6  -5   64.71    3.63   1 
   5  -6  -4  363.39    8.58   1 
   5  -6  -3   15.06    1.87   1 
   5  -6  -2  390.40    8.37   1 
   5  -6  -1   45.25    2.80   1 
   5  -6   0  120.13    4.37   1 
   5  -6   1   12.77    1.53   1 
   5  -6   2   81.39    3.55   1 
   5  -6   3    3.25    1.02   1 
   5  -6   4    0.05    0.65   1 
   5  -6   5   55.00    3.00   1 
  -5   6  -6   32.68    2.53   1 
  -5   6  -7    9.83    1.63   1 
  -5   6  -8   18.27    2.15   1 
  -5   6  -9  228.08    6.82   1 
  -5   6 -10   91.46    4.47   1 
  -5   6 -11  163.95    6.11   1 
  -5   6 -12  104.67    5.03   1 
  -5   6 -13   68.47    4.27   1 
  -5   6 -14    8.32    2.00   1 
  -5   6 -15   48.97    3.90   1 
  -5   6 -16   22.37    3.03   1 
  -5   6 -17  100.71    5.75   1 
  -5   6 -18    4.51    1.92   1 
  -5   6 -19  116.17    6.41   1 
  -5   6 -20    0.93    1.80   1 
  -5   6 -21   35.60    4.05   1 
  -5   6 -22   -0.43    1.68   1 
   5  -5 -25   -0.90    2.51   1 
   5  -5 -24    1.19    2.35   1 
   5  -5 -23    1.52    2.21   1 
   5  -5 -22    0.60    2.10   1 
   5  -5 -21   46.86    5.29   1 
   5  -5 -20   10.85    3.05   1 
   5  -5 -19   11.19    3.05   1 
   5  -5 -18   28.08    4.14   1 
   5  -5 -17    0.14    1.50   1 
   5  -5 -16    0.13    1.39   1 
   5  -5 -15    1.77    1.36   1 
   5  -5 -14    4.75    1.71   1 
   5  -5 -13   23.57    3.21   1 
   5  -5 -12   15.49    2.62   1 
   5  -5 -11   14.89    2.45   1 
   5  -5 -10    4.22    1.48   1 
   5  -5  -9    2.60    1.18   1 
   5  -5  -8   23.05    2.44   1 
   5  -5  -7   79.56    4.19   1 
   5  -5  -6    0.02    0.75   1 
   5  -5  -5   55.64    3.44   1 
   5  -5  -4    1.70    0.91   1 
   5  -5  -3    0.85    0.80   1 
   5  -5  -2   41.70    2.73   1 
   5  -5  -1   43.12    2.70   1 
   5  -5   0   18.48    1.81   1 
   5  -5   1  310.20    6.99   1 
   5  -5   2    0.54    0.71   1 
   5  -5   3  208.16    5.72   1 
   5  -5   4   91.55    3.86   1 
   5  -5   5  167.03    5.22   1 
  -5   5  -6   27.95    2.47   1 
  -5   5  -7   57.18    3.38   1 
  -5   5  -8    4.23    1.31   1 
  -5   5  -9  201.29    6.61   1 
  -5   5 -10    0.58    1.04   1 
  -5   5 -11  244.18    7.62   1 
  -5   5 -12   48.71    3.59   1 
  -5   5 -13   23.82    2.73   1 
  -5   5 -14   11.23    2.27   1 
  -5   5 -15   19.30    2.90   1 
  -5   5 -16    0.94    1.41   1 
  -5   5 -17    8.74    2.28   1 
  -5   5 -18    5.38    2.01   1 
  -5   5 -19    0.61    1.51   1 
  -5   5 -20    0.70    1.76   1 
  -5   5 -21    3.70    2.12   1 
  -5   5 -22   15.18    3.09   1 
  -5   5 -23   16.33    3.29   1 
  -5   5 -24   29.16    4.28   1 
   5  -4 -25    6.66    3.36   1 
   5  -4 -24    6.98    2.96   1 
   5  -4 -23    0.49    2.05   1 
   5  -4 -22    7.73    2.77   1 
   5  -4 -21    1.27    1.97   1 
   5  -4 -20    0.12    1.59   1 
   5  -4 -19   -0.42    1.39   1 
   5  -4 -18   19.67    3.44   1 
   5  -4 -17    4.58    1.82   1 
   5  -4 -16    0.60    1.33   1 
   5  -4 -15    1.82    1.38   1 
   5  -4 -14   50.24    4.29   1 
   5  -4 -13    1.78    1.28   1 
   5  -4 -12   51.79    4.04   1 
   5  -4 -11    0.41    0.89   1 
   5  -4 -10    0.10    0.90   1 
   5  -4  -9   70.58    4.19   1 
   5  -4  -8   14.22    2.04   1 
   5  -4  -7  305.48    8.16   1 
   5  -4  -6    0.24    0.75   1 
   5  -4  -5  394.00    8.92   1 
   5  -4  -4    8.21    1.51   1 
   5  -4  -3   63.66    3.39   1 
   5  -4  -2   11.73    1.62   1 
   5  -4  -1    1.94    0.87   1 
   5  -4   0  107.36    4.13   1 
   5  -4   1    7.42    1.32   1 
   5  -4   2   14.77    1.63   1 
   5  -4   3  116.82    4.36   1 
   5  -4   4   77.79    3.64   1 
  -5   4  -5   62.78    3.58   1 
   5  -4   5   61.84    3.23   1 
  -5   4  -6   46.23    3.13   1 
  -5   4  -7    0.89    0.90   1 
  -5   4  -8   53.48    3.48   1 
  -5   4  -9   77.00    4.21   1 
  -5   4 -10   84.33    4.54   1 
  -5   4 -11    3.55    1.44   1 
  -5   4 -12   25.94    2.85   1 
  -5   4 -13   10.11    2.14   1 
  -5   4 -14  113.64    5.91   1 
  -5   4 -15   70.02    4.90   1 
  -5   4 -16   24.26    3.33   1 
  -5   4 -17   80.75    5.44   1 
  -5   4 -18   14.89    2.90   1 
  -5   4 -19   35.90    3.92   1 
  -5   4 -20   26.73    3.84   1 
  -5   4 -21    3.67    2.06   1 
  -5   4 -22   22.60    3.80   1 
  -5   4 -23    1.84    2.19   1 
  -5   4 -24   38.54    5.02   1 
  -5   4 -25   24.66    4.33   1 
   5  -3 -26   44.70    6.32   1 
   5  -3 -25    1.24    2.53   1 
   5  -3 -24   14.18    3.74   1 
   5  -3 -23   17.23    3.75   1 
   5  -3 -22    1.75    2.05   1 
   5  -3 -21    6.40    2.42   1 
   5  -3 -20   -1.80    1.22   1 
   5  -3 -19    0.19    1.32   1 
   5  -3 -18    2.89    1.83   1 
   5  -3 -17    7.65    2.24   1 
   5  -3 -16   18.65    3.06   1 
   5  -3 -15   64.65    4.95   1 
   5  -3 -14   15.77    2.59   1 
   5  -3 -13   44.05    3.79   1 
   5  -3 -12    0.67    1.03   1 
   5  -3 -11    0.72    0.97   1 
   5  -3 -10    0.41    0.87   1 
   5  -3  -9    1.21    0.95   1 
   5  -3  -8    5.90    1.38   1 
   5  -3  -7   24.56    2.32   1 
   5  -3  -6   57.99    3.43   1 
   5  -3  -5   33.57    2.58   1 
   5  -3  -4   16.34    1.79   1 
   5  -3  -3    4.29    1.06   1 
   5  -3  -2    4.96    1.14   1 
   5  -3  -1  219.93    6.05   1 
   5  -3   0   36.20    2.49   1 
   5  -3   1  125.47    4.51   1 
   5  -3   2    0.11    0.68   1 
   5  -3   3   43.75    2.78   1 
   5  -3   4    4.58    1.15   1 
  -5   3  -5   93.62    4.36   1 
  -5   3  -6   70.41    3.87   1 
  -5   3  -7  293.53    8.02   1 
  -5   3  -8   55.86    3.64   1 
  -5   3  -9  188.04    6.68   1 
  -5   3 -10   27.80    2.83   1 
  -5   3 -11   96.82    5.07   1 
  -5   3 -12   -0.58    1.09   1 
  -5   3 -13    1.44    1.38   1 
  -5   3 -14   46.44    3.99   1 
  -5   3 -15   31.17    3.48   1 
  -5   3 -16   35.65    3.80   1 
  -5   3 -17   29.04    3.79   1 
  -5   3 -18    5.32    2.14   1 
  -5   3 -19    1.65    1.78   1 
  -5   3 -20    0.27    1.71   1 
  -5   3 -21   -0.45    1.94   1 
  -5   3 -22    0.36    1.88   1 
  -5   3 -23    1.75    2.30   1 
  -5   3 -24    6.54    2.90   1 
  -5   3 -25    0.68    2.42   1 
   5  -2 -27   23.71    4.83   1 
   5  -2 -26   54.09    6.38   1 
   5  -2 -25   10.16    3.32   1 
   5  -2 -24   67.14    6.57   1 
   5  -2 -23   10.24    2.98   1 
   5  -2 -22    8.65    2.95   1 
   5  -2 -21    4.67    2.37   1 
   5  -2 -20    1.41    1.76   1 
   5  -2 -19   36.12    4.22   1 
   5  -2 -18   -0.58    1.21   1 
   5  -2 -17   16.56    2.90   1 
   5  -2 -16   18.57    2.92   1 
   5  -2 -15   26.54    3.19   1 
   5  -2 -14   56.86    4.31   1 
   5  -2 -13   17.25    2.55   1 
   5  -2 -12    0.51    0.93   1 
   5  -2 -11   33.92    3.04   1 
   5  -2 -10   18.07    2.33   1 
   5  -2  -9    3.93    1.30   1 
   5  -2  -8   11.55    1.82   1 
   5  -2  -7  108.11    4.73   1 
   5  -2  -6    0.47    0.79   1 
   5  -2  -5   65.53    3.52   1 
   5  -2  -4   20.14    1.99   1 
   5  -2  -3    7.40    1.37   1 
   5  -2  -2  294.50    7.07   1 
   5  -2  -1   16.55    1.76   1 
   5  -2   0   97.80    3.99   1 
   5  -2   1   61.31    3.25   1 
   5  -2   2    5.58    1.22   1 
   5  -2   3   68.06    3.51   1 
  -5   2  -4   35.30    2.81   1 
   5  -2   4   31.69    2.45   1 
  -5   2  -5   16.73    2.14   1 
  -5   2  -6    0.41    0.89   1 
  -5   2  -7   24.04    2.53   1 
  -5   2  -8   19.92    2.41   1 
  -5   2  -9   12.76    2.04   1 
  -5   2 -10    1.52    1.25   1 
  -5   2 -11   22.88    2.86   1 
  -5   2 -12   94.77    5.29   1 
  -5   2 -13   15.87    2.70   1 
  -5   2 -14   38.08    3.80   1 
  -5   2 -15   82.56    5.55   1 
  -5   2 -16   18.40    3.14   1 
  -5   2 -17    6.73    2.28   1 
  -5   2 -18   14.24    2.96   1 
  -5   2 -19    1.71    1.89   1 
  -5   2 -20   68.17    5.63   1 
  -5   2 -21    0.19    1.94   1 
  -5   2 -22   54.14    5.28   1 
  -5   2 -23    6.35    2.81   1 
  -5   2 -24   30.14    4.74   1 
   5  -1 -27    1.55    2.61   1 
   5  -1 -26    9.67    3.34   1 
   5  -1 -25    4.65    2.73   1 
   5  -1 -24   36.32    5.14   1 
   5  -1 -23    6.77    2.75   1 
   5  -1 -22    8.03    2.60   1 
   5  -1 -21   66.95    5.80   1 
   5  -1 -20   10.10    2.67   1 
   5  -1 -19   16.36    3.05   1 
   5  -1 -18   75.26    5.56   1 
   5  -1 -17    4.31    1.66   1 
   5  -1 -16  196.59    8.22   1 
   5  -1 -15   19.27    2.83   1 
   5  -1 -14   76.44    4.80   1 
   5  -1 -13    4.78    1.55   1 
   5  -1 -12   85.00    4.75   1 
   5  -1 -11   95.32    4.79   1 
   5  -1 -10  303.42    8.40   1 
   5  -1  -9    1.53    0.94   1 
   5  -1  -8  443.54    9.79   1 
   5  -1  -7   22.80    2.26   1 
   5  -1  -6  172.28    5.77   1 
   5  -1  -5    0.18    0.63   1 
   5  -1  -4   32.30    2.41   1 
   5  -1  -3   53.12    3.02   1 
   5  -1  -2   84.83    3.79   1 
   5  -1  -1   99.41    4.13   1 
   5  -1   0  474.14    9.20   1 
   5  -1   1   25.04    2.18   1 
   5  -1   2    5.44    1.24   1 
   5  -1   3   21.82    2.08   1 
  -5   1  -4   44.11    3.15   1 
  -5   1  -5  120.60    5.16   1 
  -5   1  -6  141.29    5.68   1 
  -5   1  -7    9.26    1.88   1 
  -5   1  -8   19.81    2.45   1 
  -5   1  -9    3.96    1.47   1 
  -5   1 -10   12.92    2.28   1 
  -5   1 -11   51.19    3.94   1 
  -5   1 -12    8.17    1.97   1 
  -5   1 -13    1.73    1.42   1 
  -5   1 -14   31.43    3.55   1 
  -5   1 -15   27.22    3.65   1 
  -5   1 -16    2.05    1.76   1 
  -5   1 -17    6.36    2.31   1 
  -5   1 -18    0.68    1.66   1 
  -5   1 -19    0.89    1.87   1 
  -5   1 -20    3.35    2.13   1 
  -5   1 -21    0.53    2.10   1 
  -5   1 -22    5.93    2.67   1 
  -5   1 -23    0.55    2.20   1 
  -5   1 -24    2.44    2.80   1 
   5   0 -28   48.56    6.35   1 
   5   0 -27    1.16    2.49   1 
   5   0 -26   77.61    7.03   1 
   5   0 -25   31.06    4.90   1 
   5   0 -24   47.16    5.29   1 
   5   0 -23   17.56    3.53   1 
   5   0 -22   26.16    3.94   1 
   5   0 -21    1.96    1.80   1 
   5   0 -20   83.39    5.97   1 
   5   0 -19    4.52    1.81   1 
   5   0 -18   67.46    5.08   1 
   5   0 -17    8.02    2.09   1 
   5   0 -16   90.00    5.46   1 
   5   0 -15  108.52    5.75   1 
   5   0 -14    9.29    1.93   1 
   5   0 -13  105.48    5.32   1 
   5   0 -12    3.51    1.22   1 
   5   0 -11    1.68    1.02   1 
   5   0 -10   97.06    4.66   1 
   5   0  -9    1.17    0.90   1 
   5   0  -8  236.54    6.95   1 
   5   0  -7   26.60    2.40   1 
   5   0  -6    0.16    0.60   1 
   5   0  -5   57.55    3.25   1 
   5   0  -4  240.69    6.50   1 
   5   0  -3  110.21    4.34   1 
   5   0  -2  406.18    8.45   1 
   5   0  -1   16.90    1.80   1 
   5   0   0    1.30    0.82   1 
   5   0   1    1.52    0.82   1 
   5   0   2    2.61    1.05   1 
  -5   0  -3  629.04   11.74   1 
  -5   0  -4   73.87    4.07   1 
  -5   0  -5  413.26    9.78   1 
  -5   0  -6   80.60    4.50   1 
  -5   0  -7   42.82    3.36   1 
  -5   0  -8    3.63    1.36   1 
  -5   0  -9   21.49    2.81   1 
  -5   0 -10    3.02    1.47   1 
  -5   0 -11    4.74    1.71   1 
  -5   0 -12   -0.06    1.31   1 
  -5   0 -13   77.69    5.24   1 
  -5   0 -14   -1.20    1.35   1 
  -5   0 -15   27.97    3.78   1 
  -5   0 -16    2.32    1.83   1 
  -5   0 -17    3.27    2.02   1 
  -5   0 -18   11.67    2.93   1 
  -5   0 -19    1.66    2.03   1 
  -5   0 -20   23.99    3.97   1 
  -5   0 -21   -0.24    1.94   1 
  -5   0 -22   21.37    3.93   1 
  -5   0 -23    3.21    2.72   1 
   5   1 -28    3.84    3.02   1 
   5   1 -27    7.82    3.08   1 
   5   1 -26    3.11    2.40   1 
   5   1 -25   -0.54    1.75   1 
   5   1 -24    0.24    1.77   1 
   5   1 -23   21.51    3.73   1 
   5   1 -22   10.36    2.70   1 
   5   1 -21   67.88    5.51   1 
   5   1 -20   61.21    5.04   1 
   5   1 -19   27.68    3.65   1 
   5   1 -18   65.11    4.89   1 
   5   1 -17   10.11    2.13   1 
   5   1 -16   27.00    3.08   1 
   5   1 -15   21.62    2.69   1 
   5   1 -14   30.53    2.96   1 
   5   1 -13   73.99    4.37   1 
   5   1 -12  179.31    6.56   1 
   5   1 -11   91.10    4.60   1 
   5   1 -10  657.25   12.31   1 
   5   1  -9   72.61    3.92   1 
   5   1  -8  347.03    8.42   1 
   5   1  -7   47.97    3.09   1 
   5   1  -6  119.20    4.70   1 
   5   1  -5  248.16    6.69   1 
   5   1  -4   75.07    3.67   1 
   5   1  -3  218.67    6.20   1 
   5   1  -2  213.58    6.21   1 
   5   1  -1   93.70    4.14   1 
   5   1   0  500.15    9.78   1 
   5   1   1   43.23    2.91   1 
   5   1   2   23.71    2.29   1 
  -5  -1  -3  263.97    7.69   1 
  -5  -1  -4    2.88    1.22   1 
  -5  -1  -5   48.57    3.50   1 
  -5  -1  -6   12.82    2.14   1 
  -5  -1  -7   30.48    3.01   1 
  -5  -1  -8   -0.21    1.02   1 
  -5  -1  -9   15.54    2.52   1 
  -5  -1 -10    0.37    1.23   1 
  -5  -1 -11    7.55    2.10   1 
  -5  -1 -12    3.09    1.84   1 
  -5  -1 -13   -0.35    1.58   1 
  -5  -1 -14    0.68    1.59   1 
  -5  -1 -15    0.40    1.69   1 
  -5  -1 -16   53.22    4.88   1 
  -5  -1 -17    7.51    2.50   1 
  -5  -1 -18   21.20    3.64   1 
  -5  -1 -19    3.72    2.36   1 
  -5  -1 -20   11.43    3.07   1 
  -5  -1 -21   -0.29    2.09   1 
  -5  -1 -22    7.69    2.96   1 
  -5  -1 -23    0.84    2.45   1 
   5   2 -29   -1.01    2.43   1 
   5   2 -28   22.86    4.38   1 
   5   2 -27   10.65    3.31   1 
   5   2 -26   25.68    4.42   1 
   5   2 -25   21.42    3.96   1 
   5   2 -24    6.71    2.44   1 
   5   2 -23    1.05    1.66   1 
   5   2 -22   16.40    3.16   1 
   5   2 -21   28.85    3.87   1 
   5   2 -20   47.60    4.32   1 
   5   2 -19   25.09    3.41   1 
   5   2 -18  148.70    7.10   1 
   5   2 -17   -0.18    1.15   1 
   5   2 -16   57.83    4.19   1 
   5   2 -15    2.23    1.23   1 
   5   2 -14   10.76    1.99   1 
   5   2 -13   13.09    2.07   1 
   5   2 -12   73.27    4.18   1 
   5   2 -11    5.83    1.41   1 
   5   2 -10  357.22    8.80   1 
   5   2  -9   10.12    1.65   1 
   5   2  -8   32.49    2.58   1 
   5   2  -7  163.58    5.55   1 
   5   2  -6    1.11    0.79   1 
   5   2  -5   19.89    1.99   1 
   5   2  -4   85.13    3.89   1 
   5   2  -3   12.18    1.69   1 
   5   2  -2  109.66    4.43   1 
   5   2  -1    8.02    1.45   1 
   5   2   0  134.47    5.11   1 
   5   2   1  587.43   10.99   1 
  -5  -2  -2    0.02    0.99   1 
  -5  -2  -3  747.65   13.38   1 
  -5  -2  -4    2.85    1.29   1 
  -5  -2  -5  388.99   10.04   1 
  -5  -2  -6   33.69    3.16   1 
  -5  -2  -7  148.92    6.38   1 
  -5  -2  -8   61.80    4.28   1 
  -5  -2  -9  123.01    6.08   1 
  -5  -2 -10   10.56    2.34   1 
  -5  -2 -11  134.99    6.71   1 
  -5  -2 -12   78.20    5.39   1 
  -5  -2 -13   97.84    6.10   1 
  -5  -2 -14    7.57    2.45   1 
  -5  -2 -15    5.20    2.21   1 
  -5  -2 -16    1.04    1.67   1 
  -5  -2 -17    3.51    2.22   1 
  -5  -2 -18    8.55    2.68   1 
  -5  -2 -19   20.11    3.89   1 
  -5  -2 -20   11.42    3.18   1 
  -5  -2 -21   19.08    3.92   1 
  -5  -2 -22    0.82    2.24   1 
   5   3 -29   16.37    3.98   1 
   5   3 -28    2.25    2.49   1 
   5   3 -27    4.14    2.47   1 
   5   3 -26    0.00    2.00   1 
   5   3 -25    1.17    1.78   1 
   5   3 -24    0.24    1.67   1 
   5   3 -23    5.72    2.21   1 
   5   3 -22   62.13    5.18   1 
   5   3 -21    1.40    1.65   1 
   5   3 -20   17.55    2.93   1 
   5   3 -19    8.11    2.13   1 
   5   3 -18    2.32    1.45   1 
   5   3 -17    1.92    1.28   1 
   5   3 -16    3.02    1.40   1 
   5   3 -15   87.89    4.82   1 
   5   3 -14   18.63    2.42   1 
   5   3 -13   84.83    4.62   1 
   5   3 -12  141.67    5.68   1 
   5   3 -11  132.08    5.41   1 
   5   3 -10  175.77    6.11   1 
   5   3  -9   23.62    2.30   1 
   5   3  -8   20.15    2.03   1 
   5   3  -7  535.83   10.16   1 
   5   3  -6    6.37    1.36   1 
   5   3  -5  651.22   11.24   1 
   5   3  -4   49.74    3.08   1 
   5   3  -3  219.47    6.38   1 
   5   3  -2  108.96    4.53   1 
   5   3  -1  111.41    4.66   1 
   5   3   0    2.01    1.01   1 
  -5  -3  -1  429.88    9.86   1 
  -5  -3  -2    6.30    1.55   1 
  -5  -3  -3  179.43    6.55   1 
  -5  -3  -4   67.20    4.22   1 
  -5  -3  -5   97.02    5.11   1 
  -5  -3  -6   56.91    4.01   1 
  -5  -3  -7    2.00    1.30   1 
  -5  -3  -8    0.80    1.14   1 
  -5  -3  -9    8.56    2.10   1 
  -5  -3 -10   -0.40    1.17   1 
  -5  -3 -11    0.70    1.41   1 
  -5  -3 -12   25.59    3.57   1 
  -5  -3 -13    0.19    1.48   1 
  -5  -3 -14  163.39    8.27   1 
  -5  -3 -15    7.75    2.63   1 
  -5  -3 -16   85.17    6.31   1 
  -5  -3 -17    9.66    2.75   1 
  -5  -3 -18    7.39    2.75   1 
  -5  -3 -19   -0.20    2.11   1 
  -5  -3 -20    9.42    3.12   1 
  -5  -3 -21    4.57    2.63   1 
  -5  -3 -22   21.20    4.21   1 
   5   4 -29    8.23    3.26   1 
   5   4 -28    2.55    2.36   1 
   5   4 -27   24.47    4.16   1 
   5   4 -26    1.98    2.11   1 
   5   4 -25   22.57    3.77   1 
   5   4 -24    0.42    1.58   1 
   5   4 -23    5.20    2.11   1 
   5   4 -22   27.37    3.67   1 
   5   4 -21   31.03    3.61   1 
   5   4 -20   69.30    5.03   1 
   5   4 -19    1.16    1.30   1 
   5   4 -18    0.24    1.04   1 
   5   4 -17    3.11    1.40   1 
   5   4 -16   41.65    3.44   1 
   5   4 -15   63.79    4.08   1 
   5   4 -14    1.43    1.02   1 
   5   4 -13   46.59    3.38   1 
   5   4 -12   -0.26    0.76   1 
   5   4 -11    4.19    1.30   1 
   5   4 -10   16.50    2.09   1 
   5   4  -9  140.23    5.29   1 
   5   4  -8    6.11    1.33   1 
   5   4  -7    4.86    1.17   1 
   5   4  -6    1.38    0.85   1 
   5   4  -5   83.69    3.97   1 
   5   4  -4   15.61    1.86   1 
   5   4  -3    2.85    1.04   1 
   5   4  -2   16.24    1.91   1 
   5   4  -1  243.54    7.03   1 
   5   4   0    0.18    0.80   1 
  -5  -4  -1  495.76   10.93   1 
  -5  -4  -2   10.59    2.00   1 
  -5  -4  -3  160.46    6.39   1 
  -5  -4  -4   19.96    2.61   1 
  -5  -4  -5   26.75    2.89   1 
  -5  -4  -6  141.85    6.37   1 
  -5  -4  -7  123.72    6.15   1 
  -5  -4  -8  167.55    7.24   1 
  -5  -4  -9  138.93    6.82   1 
  -5  -4 -10   33.94    3.61   1 
  -5  -4 -11   91.12    5.86   1 
  -5  -4 -12    5.57    2.22   1 
  -5  -4 -13    6.56    2.46   1 
  -5  -4 -14   18.56    3.37   1 
  -5  -4 -15    1.35    1.94   1 
  -5  -4 -16   32.91    4.46   1 
  -5  -4 -17   41.76    4.72   1 
  -5  -4 -18   23.67    4.06   1 
  -5  -4 -19   54.71    5.60   1 
  -5  -4 -20    3.70    2.72   1 
  -5  -4 -21    6.92    3.04   1 
   5   5 -30   11.58    3.55   1 
   5   5 -29   10.62    3.31   1 
   5   5 -28    0.43    2.24   1 
   5   5 -27    0.85    2.09   1 
   5   5 -26    0.91    1.83   1 
   5   5 -25    8.92    2.70   1 
   5   5 -24   34.15    4.09   1 
   5   5 -23   22.46    3.45   1 
   5   5 -22  140.12    7.30   1 
   5   5 -21   40.03    3.91   1 
   5   5 -20   10.00    2.26   1 
   5   5 -19    4.66    1.63   1 
   5   5 -18    4.39    1.57   1 
   5   5 -17    1.28    1.11   1 
   5   5 -16   39.05    3.30   1 
   5   5 -15   -0.35    0.84   1 
   5   5 -14   42.45    3.24   1 
   5   5 -13    0.67    0.89   1 
   5   5 -12   18.79    2.18   1 
   5   5 -11    0.74    0.89   1 
   5   5 -10    5.57    1.36   1 
   5   5  -9   59.97    3.42   1 
   5   5  -8   22.58    2.14   1 
   5   5  -7  217.22    6.41   1 
   5   5  -6    1.94    0.94   1 
   5   5  -5    0.78    0.81   1 
   5   5  -4   30.05    2.48   1 
   5   5  -3   88.25    4.19   1 
   5   5  -2   78.15    4.02   1 
   5   5  -1   42.86    3.03   1 
  -5  -5   0  136.65    5.68   1 
  -5  -5  -1   35.19    3.00   1 
  -5  -5  -2    1.92    1.14   1 
  -5  -5  -3    1.41    1.19   1 
  -5  -5  -4   23.30    2.75   1 
  -5  -5  -5    4.91    1.71   1 
  -5  -5  -6    1.63    1.38   1 
  -5  -5  -7    2.00    1.36   1 
  -5  -5  -8   43.88    3.95   1 
  -5  -5  -9   27.98    3.27   1 
  -5  -5 -10    1.01    1.40   1 
  -5  -5 -11    5.09    2.13   1 
  -5  -5 -12   23.84    3.65   1 
  -5  -5 -13    1.86    1.74   1 
  -5  -5 -14   39.13    4.40   1 
  -5  -5 -15   12.48    3.16   1 
  -5  -5 -16    9.18    2.87   1 
  -5  -5 -17    1.68    2.15   1 
  -5  -5 -18   10.78    3.11   1 
  -5  -5 -19    7.15    2.98   1 
  -5  -5 -20   43.75    5.65   1 
  -5  -5 -21    9.79    3.46   1 
   5   6 -30    2.77    2.74   1 
   5   6 -29    9.04    3.06   1 
   5   6 -28    2.52    2.31   1 
   5   6 -27    6.56    2.56   1 
   5   6 -26    3.29    2.09   1 
   5   6 -25    2.52    1.90   1 
   5   6 -24   21.23    3.37   1 
   5   6 -23    5.04    2.02   1 
   5   6 -22   43.71    4.12   1 
   5   6 -21   22.07    3.07   1 
   5   6 -20    3.82    1.65   1 
   5   6 -19    3.17    1.44   1 
   5   6 -18   53.85    4.02   1 
   5   6 -17   30.71    3.01   1 
   5   6 -16    9.17    1.89   1 
   5   6 -15   44.68    3.40   1 
   5   6 -14   28.40    2.69   1 
   5   6 -13   -0.01    0.80   1 
   5   6 -12  110.91    4.91   1 
   5   6 -11   44.96    3.12   1 
   5   6 -10  228.26    6.76   1 
   5   6  -9   22.21    2.16   1 
   5   6  -8  365.33    8.49   1 
   5   6  -7    0.24    0.71   1 
   5   6  -6   25.44    2.28   1 
   5   6  -5   39.75    2.84   1 
   5   6  -4   28.90    2.47   1 
   5   6  -3   29.21    2.54   1 
   5   6  -2    8.85    1.65   1 
  -5  -6   1  102.77    4.95   1 
  -5  -6   0    8.70    1.80   1 
  -5  -6  -1   21.11    2.57   1 
  -5  -6  -2   11.46    2.05   1 
  -5  -6  -3    1.18    1.23   1 
  -5  -6  -4   33.60    3.20   1 
  -5  -6  -5   -0.01    1.09   1 
  -5  -6  -6   85.96    5.27   1 
  -5  -6  -7   59.94    4.59   1 
  -5  -6  -8   50.04    4.29   1 
  -5  -6  -9   12.53    2.70   1 
  -5  -6 -10   37.41    3.91   1 
  -5  -6 -11    3.93    1.94   1 
  -5  -6 -12   18.64    3.26   1 
  -5  -6 -13   10.68    2.87   1 
  -5  -6 -14   49.02    4.92   1 
  -5  -6 -15    2.42    2.01   1 
  -5  -6 -16   61.16    5.67   1 
  -5  -6 -17   27.69    4.56   1 
  -5  -6 -18   36.97    5.07   1 
  -5  -6 -19    4.09    2.67   1 
  -5  -6 -20    7.05    2.89   1 
   5   7 -30    6.52    2.92   1 
   5   7 -29    2.54    2.36   1 
   5   7 -28    1.03    2.01   1 
   5   7 -27    0.78    1.84   1 
   5   7 -26   37.69    4.33   1 
   5   7 -25    0.19    1.60   1 
   5   7 -24   92.21    6.01   1 
   5   7 -23    7.52    2.19   1 
   5   7 -22   55.03    4.47   1 
   5   7 -21    2.55    1.40   1 
   5   7 -20   36.45    3.55   1 
   5   7 -19    4.23    1.60   1 
   5   7 -18  139.63    6.26   1 
   5   7 -17   23.34    2.64   1 
   5   7 -16  266.08    8.19   1 
   5   7 -15    0.68    0.99   1 
   5   7 -14  189.75    6.63   1 
   5   7 -13    4.95    1.39   1 
   5   7 -12   40.97    3.04   1 
   5   7 -11   22.52    2.26   1 
   5   7 -10   -0.05    0.76   1 
   5   7  -9  104.27    4.55   1 
   5   7  -8   41.33    2.91   1 
   5   7  -7    0.51    0.72   1 
   5   7  -6    0.26    0.80   1 
   5   7  -5   55.70    3.38   1 
   5   7  -4   99.17    4.53   1 
   5   7  -3    1.27    0.93   1 
  -5  -7   2   92.45    4.70   1 
  -5  -7   1   -0.36    0.88   1 
  -5  -7   0    6.50    1.68   1 
  -5  -7  -1    6.34    1.77   1 
  -5  -7  -2   13.08    2.25   1 
  -5  -7  -3   56.62    4.11   1 
  -5  -7  -4    1.81    1.37   1 
  -5  -7  -5   35.70    3.55   1 
  -5  -7  -6   75.49    5.09   1 
  -5  -7  -7   -0.50    1.13   1 
  -5  -7  -8   69.72    5.12   1 
  -5  -7  -9    7.19    2.25   1 
  -5  -7 -10    7.98    2.49   1 
  -5  -7 -11   -0.41    1.44   1 
  -5  -7 -12   11.69    2.90   1 
  -5  -7 -13   13.82    2.98   1 
  -5  -7 -14    1.47    1.91   1 
  -5  -7 -15    3.83    2.33   1 
  -5  -7 -16    4.90    2.61   1 
  -5  -7 -17    0.77    2.16   1 
  -5  -7 -18    1.48    2.37   1 
  -5  -7 -19    4.43    2.84   1 
   5   8 -29    2.66    2.37   1 
   5   8 -28    6.54    2.61   1 
   5   8 -27    9.38    2.84   1 
   5   8 -26   24.83    3.74   1 
   5   8 -25    0.11    1.49   1 
   5   8 -24    0.20    1.51   1 
   5   8 -23   55.72    4.58   1 
   5   8 -22    1.08    1.46   1 
   5   8 -21   85.39    5.29   1 
   5   8 -20    0.31    1.18   1 
   5   8 -19    2.44    1.38   1 
   5   8 -18   -0.05    1.07   1 
   5   8 -17   19.15    2.39   1 
   5   8 -16   14.99    2.23   1 
   5   8 -15    1.79    1.13   1 
   5   8 -14    1.14    0.98   1 
   5   8 -13  184.01    6.35   1 
   5   8 -12  209.47    6.63   1 
   5   8 -11  267.11    7.46   1 
   5   8 -10  501.55   10.15   1 
   5   8  -9   52.11    3.30   1 
   5   8  -8  131.74    5.06   1 
   5   8  -7   17.20    2.00   1 
   5   8  -6    7.07    1.48   1 
   5   8  -5  193.49    6.34   1 
   5   8  -4    4.26    1.33   1 
  -5  -8   3  377.38    9.55   1 
  -5  -8   2   19.48    2.34   1 
  -5  -8   1  105.37    5.22   1 
  -5  -8   0   15.02    2.39   1 
  -5  -8  -1    0.05    1.08   1 
  -5  -8  -2    0.46    1.14   1 
  -5  -8  -3    6.31    1.76   1 
  -5  -8  -4    1.32    1.39   1 
  -5  -8  -5   16.70    2.72   1 
  -5  -8  -6    2.47    1.58   1 
  -5  -8  -7   61.10    4.79   1 
  -5  -8  -8   -0.90    1.47   1 
  -5  -8  -9    2.02    1.71   1 
  -5  -8 -10    0.81    1.67   1 
  -5  -8 -11    3.97    1.96   1 
  -5  -8 -12    8.81    2.72   1 
  -5  -8 -13    1.73    2.05   1 
  -5  -8 -14    6.79    2.69   1 
  -5  -8 -15    0.75    2.08   1 
  -5  -8 -16    1.01    2.39   1 
  -5  -8 -17    0.00    2.22   1 
  -5  -8 -18    1.24    2.27   1 
   5   9 -28   43.26    4.71   1 
   5   9 -27    0.60    1.96   1 
   5   9 -26   62.49    5.25   1 
   5   9 -25    3.44    1.97   1 
   5   9 -24   26.95    3.34   1 
   5   9 -23   18.05    2.88   1 
   5   9 -22   12.75    2.47   1 
   5   9 -21   37.21    3.50   1 
   5   9 -20   49.43    4.00   1 
   5   9 -19   69.61    4.47   1 
   5   9 -18   89.26    4.98   1 
   5   9 -17   23.40    2.64   1 
   5   9 -16  223.82    7.41   1 
   5   9 -15   53.48    3.62   1 
   5   9 -14    4.32    1.32   1 
   5   9 -13   60.39    3.63   1 
   5   9 -12   25.95    2.46   1 
   5   9 -11   81.49    4.05   1 
   5   9 -10   55.40    3.43   1 
   5   9  -9   34.98    2.72   1 
   5   9  -8   78.58    3.98   1 
   5   9  -7    1.22    0.94   1 
   5   9  -6    5.78    1.39   1 
   5   9  -5    2.79    1.15   1 
  -5  -9   4    2.28    1.22   1 
  -5  -9   3    3.07    1.36   1 
  -5  -9   2    0.07    1.05   1 
  -5  -9   1   50.13    3.80   1 
  -5  -9   0   13.35    2.34   1 
  -5  -9  -1   65.45    4.43   1 
  -5  -9  -2    4.82    1.78   1 
  -5  -9  -3  202.21    8.01   1 
  -5  -9  -4    8.96    2.29   1 
  -5  -9  -5   25.69    3.39   1 
  -5  -9  -6   -0.11    1.41   1 
  -5  -9  -7    0.18    1.46   1 
  -5  -9  -8   26.65    3.74   1 
  -5  -9  -9   11.98    2.83   1 
  -5  -9 -10   12.72    2.88   1 
  -5  -9 -11   11.79    2.90   1 
  -5  -9 -12    0.22    1.71   1 
  -5  -9 -13    8.73    2.81   1 
  -5  -9 -14    6.64    2.72   1 
  -5  -9 -15    9.47    3.08   1 
  -5  -9 -16    0.15    2.27   1 
  -5  -9 -17    2.71    2.61   1 
  -5  -9 -18   11.60    3.54   1 
   5  10 -26   18.88    3.26   1 
   5  10 -25   -0.53    1.58   1 
   5  10 -24    3.24    1.80   1 
   5  10 -23    3.80    1.74   1 
   5  10 -22    1.13    1.46   1 
   5  10 -21    0.91    1.38   1 
   5  10 -20    3.69    1.60   1 
   5  10 -19    2.68    1.35   1 
   5  10 -18   42.84    3.50   1 
   5  10 -17    1.39    1.19   1 
   5  10 -16   51.67    3.61   1 
   5  10 -15   51.39    3.53   1 
   5  10 -14   15.79    2.13   1 
   5  10 -13   68.76    3.85   1 
   5  10 -12   65.14    3.75   1 
   5  10 -11    2.29    1.12   1 
   5  10 -10   67.75    3.71   1 
   5  10  -9  104.13    4.57   1 
   5  10  -8   23.28    2.31   1 
   5  10  -7  252.23    7.28   1 
   5  10  -6   61.69    3.67   1 
  -5 -10   5  680.61   13.09   1 
  -5 -10   4    1.21    1.22   1 
  -5 -10   3  312.04    9.00   1 
  -5 -10   2    2.74    1.37   1 
  -5 -10   1   64.72    4.34   1 
  -5 -10   0    2.35    1.33   1 
  -5 -10  -1    3.58    1.59   1 
  -5 -10  -2    4.13    1.72   1 
  -5 -10  -3  136.42    6.68   1 
  -5 -10  -4   11.02    2.37   1 
  -5 -10  -5   62.55    4.83   1 
  -5 -10  -6    1.43    1.48   1 
  -5 -10  -7    9.03    2.38   1 
  -5 -10  -8    2.24    1.94   1 
  -5 -10  -9    0.43    1.60   1 
  -5 -10 -10   -0.07    1.76   1 
  -5 -10 -11   19.12    3.62   1 
  -5 -10 -12    2.66    2.15   1 
  -5 -10 -13   11.73    3.23   1 
  -5 -10 -14   -0.96    1.97   1 
  -5 -10 -15   -0.56    2.32   1 
  -5 -10 -16    3.00    2.65   1 
  -5 -10 -17    1.72    2.67   1 
   5  11 -24    2.50    1.67   1 
   5  11 -23   39.73    3.86   1 
   5  11 -22    4.69    1.79   1 
   5  11 -21  126.06    6.11   1 
   5  11 -20   24.31    2.90   1 
   5  11 -19  113.28    5.63   1 
   5  11 -18   22.44    2.79   1 
   5  11 -17   88.70    4.68   1 
   5  11 -16   18.64    2.35   1 
   5  11 -15   52.90    3.57   1 
   5  11 -14   28.83    2.65   1 
   5  11 -13   47.26    3.22   1 
   5  11 -12    9.91    1.71   1 
   5  11 -11   81.70    4.09   1 
   5  11 -10   43.28    3.02   1 
   5  11  -9   52.58    3.35   1 
   5  11  -8    0.03    0.82   1 
   5  11  -7   40.79    3.02   1 
  -5 -11   6   10.35    2.04   1 
  -5 -11   5   63.23    4.08   1 
  -5 -11   4    1.13    1.26   1 
  -5 -11   3   16.08    2.52   1 
  -5 -11   2   66.29    4.45   1 
  -5 -11   1    0.04    1.19   1 
  -5 -11   0    5.14    1.74   1 
  -5 -11  -1   33.10    3.44   1 
  -5 -11  -2   -0.06    1.28   1 
  -5 -11  -3   16.12    2.84   1 
  -5 -11  -4    6.94    2.15   1 
  -5 -11  -5    1.55    1.56   1 
  -5 -11  -6  101.35    6.42   1 
  -5 -11  -7   -0.43    1.66   1 
  -5 -11  -8   77.57    6.02   1 
  -5 -11  -9    4.08    2.20   1 
  -5 -11 -10    5.26    2.45   1 
  -5 -11 -11    2.98    2.39   1 
  -5 -11 -12    2.40    2.36   1 
  -5 -11 -13    2.70    2.41   1 
  -5 -11 -14    5.57    2.89   1 
  -5 -11 -15    0.58    2.36   1 
  -5 -11 -16   36.30    5.38   1 
   5  12 -22   12.98    2.41   1 
   5  12 -21   36.50    3.50   1 
   5  12 -20    0.19    1.26   1 
   5  12 -19   23.68    2.78   1 
   5  12 -18    0.42    1.13   1 
   5  12 -17   38.60    3.12   1 
   5  12 -16   16.30    2.27   1 
   5  12 -15   87.31    4.38   1 
   5  12 -14   10.23    1.88   1 
   5  12 -13    0.76    1.01   1 
   5  12 -12    0.55    0.90   1 
   5  12 -11    1.88    1.07   1 
   5  12 -10   33.15    2.71   1 
   5  12  -9   12.71    1.97   1 
   5  12  -8   68.56    3.91   1 
  -5 -12   7  139.30    5.94   1 
  -5 -12   6   60.24    4.02   1 
  -5 -12   5  146.75    6.21   1 
  -5 -12   4   36.81    3.35   1 
  -5 -12   3    2.11    1.39   1 
  -5 -12   2   80.23    4.88   1 
  -5 -12   1    4.78    1.77   1 
  -5 -12   0  140.59    6.68   1 
  -5 -12  -1   36.50    3.60   1 
  -5 -12  -2  118.71    6.43   1 
  -5 -12  -3   48.52    4.35   1 
  -5 -12  -4   32.21    3.71   1 
  -5 -12  -5    3.53    1.97   1 
  -5 -12  -6    4.35    2.17   1 
  -5 -12  -7    1.36    1.80   1 
  -5 -12  -8    6.74    2.55   1 
  -5 -12  -9    2.09    2.05   1 
  -5 -12 -10   26.40    4.27   1 
  -5 -12 -11   26.64    4.39   1 
  -5 -12 -12    7.00    2.71   1 
  -5 -12 -13    3.14    2.56   1 
  -5 -12 -14    1.66    2.49   1 
  -5 -12 -15    4.04    2.90   1 
   5  13 -20    2.68    1.53   1 
   5  13 -19   16.17    2.42   1 
   5  13 -18   17.47    2.46   1 
   5  13 -17   81.46    4.41   1 
   5  13 -16   35.26    2.96   1 
   5  13 -15  159.84    5.84   1 
   5  13 -14    3.44    1.27   1 
   5  13 -13   21.89    2.30   1 
   5  13 -12    8.01    1.62   1 
   5  13 -11   18.06    2.22   1 
   5  13 -10   77.15    4.02   1 
   5  13  -9    9.89    1.79   1 
  -5 -13   8   30.38    3.06   1 
  -5 -13   7   87.99    4.79   1 
  -5 -13   6    0.81    1.24   1 
  -5 -13   5   94.44    5.19   1 
  -5 -13   4   31.72    3.21   1 
  -5 -13   3   75.12    4.74   1 
  -5 -13   2   -0.13    1.21   1 
  -5 -13   1    0.54    1.29   1 
  -5 -13   0   22.17    3.16   1 
  -5 -13  -1   29.18    3.42   1 
  -5 -13  -2   20.00    3.13   1 
  -5 -13  -3   23.87    3.45   1 
  -5 -13  -4   28.62    3.81   1 
  -5 -13  -5    2.89    1.94   1 
  -5 -13  -6   76.60    5.93   1 
  -5 -13  -7    1.18    1.93   1 
  -5 -13  -8   32.57    4.53   1 
  -5 -13  -9    0.35    1.98   1 
  -5 -13 -10    9.73    3.02   1 
  -5 -13 -11    8.28    2.75   1 
  -5 -13 -12   13.29    3.66   1 
  -5 -13 -13   42.45    5.30   1 
  -5 -13 -14   51.64    5.89   1 
   5  14 -17   82.12    4.36   1 
   5  14 -16    3.99    1.45   1 
   5  14 -15   53.95    3.44   1 
   5  14 -14    1.72    1.13   1 
   5  14 -13   28.31    2.57   1 
   5  14 -12   19.99    2.26   1 
   5  14 -11   27.80    2.56   1 
  -5 -14  10   46.25    3.55   1 
  -5 -14   9   17.28    2.56   1 
  -5 -14   8   40.99    3.38   1 
  -5 -14   7    1.49    1.34   1 
  -5 -14   6    1.50    1.30   1 
  -5 -14   5    0.13    1.25   1 
  -5 -14   4   -0.61    1.12   1 
  -5 -14   3    2.38    1.49   1 
  -5 -14   2  155.90    7.05   1 
  -5 -14   1   19.55    2.99   1 
  -5 -14   0  208.24    8.42   1 
  -5 -14  -1   46.69    4.24   1 
  -5 -14  -2   22.19    3.34   1 
  -5 -14  -3   22.40    3.49   1 
  -5 -14  -4   23.20    3.64   1 
  -5 -14  -5    1.37    1.85   1 
  -5 -14  -6   28.14    4.12   1 
  -5 -14  -7    0.62    1.97   1 
  -5 -14  -8   84.40    6.56   1 
  -5 -14  -9    7.76    2.90   1 
  -5 -14 -10   32.63    4.69   1 
  -5 -14 -11    7.85    3.18   1 
  -5 -14 -12    7.59    3.17   1 
  -5 -14 -13    0.09    2.62   1 
   5  15 -15   33.92    2.80   1 
   5  15 -14    4.16    1.44   1 
   5  15 -13    0.97    1.06   1 
   5  15 -12    5.08    1.47   1 
  -5 -15  11   44.54    3.51   1 
  -5 -15  10    2.67    1.50   1 
  -5 -15   9   23.72    2.83   1 
  -5 -15   8    0.31    1.20   1 
  -5 -15   7    1.69    1.34   1 
  -5 -15   6   31.40    3.26   1 
  -5 -15   5    0.81    1.35   1 
  -5 -15   4   29.16    3.26   1 
  -5 -15   3   32.54    3.46   1 
  -5 -15   2    5.38    2.08   1 
  -5 -15   1    0.48    1.36   1 
  -5 -15   0   37.21    3.95   1 
  -5 -15  -1    9.99    2.58   1 
  -5 -15  -2    1.23    1.73   1 
  -5 -15  -3   -0.39    1.65   1 
  -5 -15  -4   30.50    4.24   1 
  -5 -15  -5    4.93    2.31   1 
  -5 -15  -6    5.76    2.45   1 
  -5 -15  -7    7.63    2.72   1 
  -5 -15  -8    1.25    2.14   1 
  -5 -15  -9   -1.72    2.11   1 
  -5 -15 -10    5.37    2.85   1 
  -5 -15 -11   29.19    4.77   1 
  -5 -15 -12   24.45    4.66   1 
  -5 -16  12   13.62    2.43   1 
  -5 -16  11   96.03    5.06   1 
  -5 -16  10    0.18    1.33   1 
  -5 -16   9   78.65    4.72   1 
  -5 -16   8   20.88    2.87   1 
  -5 -16   7   -0.69    1.28   1 
  -5 -16   6    2.05    1.53   1 
  -5 -16   5    1.59    1.59   1 
  -5 -16   4   38.34    3.66   1 
  -5 -16   3    5.48    1.99   1 
  -5 -16   2   25.85    3.44   1 
  -5 -16   1   34.63    3.74   1 
  -5 -16   0   -0.02    1.67   1 
  -5 -16  -1    0.53    1.58   1 
  -5 -16  -2    4.52    2.28   1 
  -5 -16  -3    7.09    2.57   1 
  -5 -16  -4   12.10    2.90   1 
  -5 -16  -5    0.59    2.15   1 
  -5 -16  -6   31.84    4.59   1 
  -5 -16  -7    2.93    2.42   1 
  -5 -16  -8   19.10    3.83   1 
  -5 -16  -9    4.61    2.82   1 
  -5 -16 -10    0.10    2.55   1 
  -5 -16 -11    3.22    2.86   1 
  -5 -17  11    8.33    2.07   1 
  -5 -17  10    0.36    1.32   1 
  -5 -17   9    0.00    1.41   1 
  -5 -17   8   42.96    3.76   1 
  -5 -17   7    6.47    2.02   1 
  -5 -17   6   31.43    3.30   1 
  -5 -17   5   54.10    4.36   1 
  -5 -17   4    3.99    1.95   1 
  -5 -17   3   22.85    3.25   1 
  -5 -17   2    0.75    1.72   1 
  -5 -17   1    1.17    1.85   1 
  -5 -17   0   20.56    3.51   1 
  -5 -17  -1    1.14    1.86   1 
  -5 -17  -2   27.88    4.13   1 
  -5 -17  -3    2.85    2.23   1 
  -5 -17  -4    0.34    2.18   1 
  -5 -17  -5   51.24    5.40   1 
  -5 -17  -6    1.18    2.39   1 
  -5 -17  -7   15.71    3.57   1 
  -5 -17  -8    3.66    2.61   1 
  -5 -17  -9   -0.16    2.43   1 
  -5 -18   9   19.56    2.92   1 
  -5 -18   8   -1.45    1.41   1 
  -5 -18   7    4.20    1.80   1 
  -5 -18   6   10.30    2.51   1 
  -5 -18   5   94.56    5.62   1 
  -5 -18   4   20.68    3.26   1 
  -5 -18   3   81.81    5.57   1 
  -5 -18   2    5.39    2.34   1 
  -5 -18   1   34.73    4.05   1 
  -5 -18   0    0.94    2.04   1 
  -5 -18  -1    1.09    2.17   1 
  -5 -18  -2    1.11    2.16   1 
  -5 -18  -3    3.00    2.34   1 
  -5 -18  -4    1.71    2.46   1 
  -5 -18  -5   10.16    3.26   1 
  -5 -18  -6    0.68    2.32   1 
  -5 -18  -7    2.38    2.59   1 
  -5 -18  -8    5.30    2.91   1 
  -5 -19   6    7.20    2.26   1 
  -5 -19   5   42.83    4.12   1 
  -5 -19   4   19.28    3.18   1 
  -5 -19   3    0.08    1.83   1 
  -5 -19   2   48.43    4.68   1 
  -5 -19   1    0.36    2.01   1 
  -5 -19   0  121.13    7.31   1 
  -5 -19  -1    4.90    2.52   1 
  -5 -19  -2   72.97    6.10   1 
  -5 -19  -3   26.22    4.22   1 
  -5 -19  -4    5.81    2.66   1 
  -5 -19  -5    4.06    2.63   1 
  -5 -19  -6   11.19    3.56   1 
  -5 -19  -7    0.49    2.49   1 
  -5 -20   2    1.83    2.20   1 
  -5 -20   1    7.83    2.76   1 
  -5 -20   0    4.66    2.62   1 
  -5 -20  -1   -0.57    2.25   1 
  -5 -20  -2    7.75    3.02   1 
  -5 -20  -3   32.62    4.68   1 
  -5 -20  -4   -0.13    2.32   1 
  -5 -20  -5   14.01    3.94   1 
  -5 -21  -3    0.74    2.77   1 
  -5 -21  -4    7.59    3.29   1 
   6 -18 -12    4.85    2.83   1 
   6 -18 -11   27.17    4.23   1 
   6 -18 -10    7.16    2.58   1 
   6 -18  -9   33.00    4.10   1 
   6 -18  -8   10.88    2.82   1 
   6 -17 -13   -0.14    2.30   1 
   6 -17 -12    4.11    2.59   1 
   6 -17 -11   17.33    3.51   1 
   6 -17 -10    1.66    1.92   1 
   6 -17  -9   18.72    3.43   1 
   6 -17  -8    2.97    2.06   1 
   6 -17  -7   -0.75    1.71   1 
   6 -17  -6   44.43    4.15   1 
   6 -17  -5    0.48    1.56   1 
   6 -17  -4   94.36    5.51   1 
   6 -16 -15   21.56    4.47   1 
   6 -16 -14   -1.15    2.17   1 
   6 -16 -13    7.15    2.82   1 
   6 -16 -12   22.22    3.89   1 
   6 -16 -11    2.09    2.16   1 
   6 -16 -10   30.68    4.17   1 
   6 -16  -9   51.08    4.84   1 
   6 -16  -8    4.07    1.95   1 
   6 -16  -7   45.71    4.36   1 
   6 -16  -6    1.53    1.69   1 
   6 -16  -5    0.71    1.44   1 
   6 -16  -4   26.83    3.15   1 
   6 -16  -3    0.49    1.46   1 
   6 -16  -2    2.64    1.56   1 
   6 -16  -1    8.89    2.05   1 
   6 -15 -16    0.67    2.35   1 
   6 -15 -15    1.09    2.36   1 
   6 -15 -14    1.68    2.26   1 
   6 -15 -13   17.27    3.59   1 
   6 -15 -12    1.09    1.86   1 
   6 -15 -11    9.91    2.79   1 
   6 -15 -10    3.47    1.98   1 
   6 -15  -9    4.66    1.98   1 
   6 -15  -8    0.19    1.36   1 
   6 -15  -7   -0.41    1.48   1 
   6 -15  -6   45.34    4.08   1 
   6 -15  -5    3.18    1.70   1 
   6 -15  -4   80.83    4.99   1 
   6 -15  -3   56.14    4.18   1 
   6 -15  -2   44.75    3.65   1 
   6 -15  -1    2.25    1.43   1 
   6 -15   0   53.86    3.72   1 
   6 -15   1   26.81    2.65   1 
   6 -14 -17    1.36    2.46   1 
   6 -14 -16    4.70    2.70   1 
   6 -14 -15    0.58    2.10   1 
   6 -14 -14    9.90    3.04   1 
   6 -14 -13    0.35    1.86   1 
   6 -14 -12   12.36    3.04   1 
   6 -14 -11    5.35    2.16   1 
   6 -14 -10    0.54    1.58   1 
   6 -14  -9    3.45    1.89   1 
   6 -14  -8    0.44    1.36   1 
   6 -14  -7   -0.43    1.20   1 
   6 -14  -6   94.19    5.53   1 
   6 -14  -5    8.10    2.11   1 
   6 -14  -4   65.93    4.42   1 
   6 -14  -3    3.46    1.52   1 
   6 -14  -2   15.72    2.42   1 
   6 -14  -1    1.65    1.33   1 
   6 -14   0    3.65    1.39   1 
   6 -14   1    0.95    1.15   1 
   6 -14   2    4.07    1.38   1 
   6 -14   3    2.04    1.21   1 
   6 -13 -18   -0.32    2.24   1 
   6 -13 -17   16.10    3.86   1 
   6 -13 -16    1.18    2.18   1 
   6 -13 -15   44.67    5.14   1 
   6 -13 -14    2.21    2.05   1 
   6 -13 -13   62.28    5.61   1 
   6 -13 -12    6.20    2.28   1 
   6 -13 -11   15.81    3.01   1 
   6 -13 -10    5.93    2.19   1 
   6 -13  -9   18.74    3.00   1 
   6 -13  -8   -0.14    1.23   1 
   6 -13  -7   95.44    5.68   1 
   6 -13  -6   17.02    2.67   1 
   6 -13  -5  107.04    5.61   1 
   6 -13  -4   29.16    3.03   1 
   6 -13  -3    3.67    1.49   1 
   6 -13  -2    8.74    1.96   1 
   6 -13  -1   39.98    3.21   1 
   6 -13   0    5.89    1.59   1 
   6 -13   1   24.83    2.51   1 
   6 -13   2   44.12    3.08   1 
   6 -13   3    2.16    1.11   1 
   6 -13   4   26.15    2.31   1 
   6 -13   5   -0.18    0.95   1 
   6 -13   6    0.41    0.89   1 
   6 -12 -19   18.83    4.37   1 
   6 -12 -18   16.35    3.92   1 
   6 -12 -17    4.63    2.57   1 
   6 -12 -16   -1.43    1.85   1 
   6 -12 -15   -0.32    1.84   1 
   6 -12 -14    0.82    1.78   1 
   6 -12 -13    0.90    1.68   1 
   6 -12 -12   15.95    3.12   1 
   6 -12 -11    0.13    1.42   1 
   6 -12 -10   29.94    3.59   1 
   6 -12  -9    5.05    1.90   1 
   6 -12  -8   -0.15    1.31   1 
   6 -12  -7   14.91    2.57   1 
   6 -12  -6    0.93    1.21   1 
   6 -12  -5    6.63    1.78   1 
   6 -12  -4    0.83    1.22   1 
   6 -12  -3   46.12    3.58   1 
   6 -12  -2   18.76    2.50   1 
   6 -12  -1   -0.13    0.97   1 
   6 -12   0   29.48    2.68   1 
   6 -12   1   84.41    4.20   1 
   6 -12   2   17.21    2.06   1 
   6 -12   3  113.01    4.59   1 
   6 -12   4   11.67    1.78   1 
   6 -12   5    2.90    1.13   1 
   6 -12   6  120.59    4.47   1 
   6 -12   7   10.78    1.62   1 
   6 -11 -20    0.69    2.57   1 
   6 -11 -19   18.84    4.24   1 
   6 -11 -18   13.34    3.55   1 
   6 -11 -17  105.56    7.88   1 
   6 -11 -16   10.49    3.21   1 
   6 -11 -15   67.27    5.98   1 
   6 -11 -14    1.38    1.87   1 
   6 -11 -13   20.46    3.51   1 
   6 -11 -12    3.47    1.88   1 
   6 -11 -11   18.55    3.10   1 
   6 -11 -10    3.83    1.77   1 
   6 -11  -9  222.25    8.80   1 
   6 -11  -8   57.62    4.47   1 
   6 -11  -7  147.45    6.67   1 
   6 -11  -6   17.75    2.64   1 
   6 -11  -5   78.49    4.68   1 
   6 -11  -4   11.03    2.06   1 
   6 -11  -3    9.82    1.91   1 
   6 -11  -2    2.64    1.21   1 
   6 -11  -1    1.93    1.18   1 
   6 -11   0   44.54    3.15   1 
   6 -11   1   -0.75    0.86   1 
   6 -11   2  102.44    4.41   1 
   6 -11   3   28.99    2.44   1 
   6 -11   4    2.08    1.11   1 
   6 -11   5    0.66    0.87   1 
   6 -11   6   88.79    3.89   1 
   6 -11   7    2.19    1.10   1 
  -6  11  -8    0.18    1.08   1 
  -6  11  -9   44.00    3.09   1 
   6 -10 -21   59.60    6.69   1 
   6 -10 -20    0.51    2.34   1 
   6 -10 -19    6.21    2.90   1 
   6 -10 -18   12.29    3.44   1 
   6 -10 -17   13.54    3.37   1 
   6 -10 -16    6.22    2.56   1 
   6 -10 -15   18.52    3.57   1 
   6 -10 -14    0.06    1.45   1 
   6 -10 -13   24.01    3.71   1 
   6 -10 -12   18.22    3.16   1 
   6 -10 -11    3.55    1.78   1 
   6 -10 -10    0.22    1.25   1 
   6 -10  -9    0.09    1.15   1 
   6 -10  -8    0.85    1.19   1 
   6 -10  -7    0.31    1.05   1 
   6 -10  -6   25.45    2.84   1 
   6 -10  -5    0.14    1.04   1 
   6 -10  -4   68.25    4.20   1 
   6 -10  -3    1.67    1.07   1 
   6 -10  -2  117.34    5.26   1 
   6 -10  -1   36.71    2.95   1 
   6 -10   0   32.75    2.74   1 
   6 -10   1   47.13    3.11   1 
   6 -10   2    0.39    0.88   1 
   6 -10   3    0.33    0.89   1 
   6 -10   4  216.25    6.14   1 
   6 -10   5   -0.25    0.91   1 
   6 -10   6  193.39    5.82   1 
   6 -10   7   87.33    3.97   1 
  -6  10  -8    9.73    1.83   1 
  -6  10  -9   28.64    2.67   1 
  -6  10 -10    4.13    1.44   1 
  -6  10 -11   21.56    2.48   1 
  -6  10 -12   22.15    2.48   1 
   6  -9 -22    1.38    2.77   1 
   6  -9 -21   -0.02    2.36   1 
   6  -9 -20   15.68    3.91   1 
   6  -9 -19   42.04    5.22   1 
   6  -9 -18   13.48    3.36   1 
   6  -9 -17   35.51    4.90   1 
   6  -9 -16    9.09    2.79   1 
   6  -9 -15    0.94    1.67   1 
   6  -9 -14   50.66    4.90   1 
   6  -9 -13    0.28    1.36   1 
   6  -9 -12  115.36    6.70   1 
   6  -9 -11    5.85    1.92   1 
   6  -9 -10  164.11    7.55   1 
   6  -9  -9   59.17    4.48   1 
   6  -9  -8  115.79    5.90   1 
   6  -9  -7    5.04    1.59   1 
   6  -9  -6    1.12    1.07   1 
   6  -9  -5    0.41    1.01   1 
   6  -9  -4    5.60    1.51   1 
   6  -9  -3    0.92    0.97   1 
   6  -9  -2  237.85    7.24   1 
   6  -9  -1   15.94    2.18   1 
   6  -9   0  141.92    5.35   1 
   6  -9   1  181.33    5.91   1 
   6  -9   2   20.14    2.11   1 
   6  -9   3   17.04    1.91   1 
   6  -9   4   17.73    1.91   1 
   6  -9   5   -0.06    0.84   1 
   6  -9   6    0.47    0.92   1 
  -6   9  -7    1.51    1.26   1 
  -6   9  -8    9.59    1.85   1 
  -6   9  -9    6.69    1.68   1 
  -6   9 -10    1.60    1.31   1 
  -6   9 -11   35.53    3.02   1 
  -6   9 -12   23.61    2.69   1 
  -6   9 -13   -0.47    1.24   1 
  -6   9 -14   22.65    2.76   1 
  -6   9 -15   -1.17    1.23   1 
   6  -8 -22    2.38    2.53   1 
   6  -8 -21    5.43    2.94   1 
   6  -8 -20   23.78    4.51   1 
   6  -8 -19   -0.10    2.03   1 
   6  -8 -18   71.24    6.43   1 
   6  -8 -17   20.24    3.67   1 
   6  -8 -16   34.66    4.50   1 
   6  -8 -15    9.26    2.63   1 
   6  -8 -14   22.97    3.58   1 
   6  -8 -13    1.55    1.47   1 
   6  -8 -12   23.58    3.35   1 
   6  -8 -11   11.70    2.34   1 
   6  -8 -10   22.54    3.11   1 
   6  -8  -9    8.73    2.08   1 
   6  -8  -8   -0.42    0.90   1 
   6  -8  -7   22.95    2.66   1 
   6  -8  -6   42.24    3.48   1 
   6  -8  -5   58.81    3.89   1 
   6  -8  -4   47.37    3.48   1 
   6  -8  -3   34.85    2.94   1 
   6  -8  -2   23.74    2.41   1 
   6  -8  -1    7.24    1.52   1 
   6  -8   0   11.53    1.78   1 
   6  -8   1   27.81    2.41   1 
   6  -8   2   20.41    2.09   1 
   6  -8   3   40.78    2.79   1 
   6  -8   4   82.96    3.89   1 
   6  -8   5    4.29    1.27   1 
   6  -8   6   67.50    3.57   1 
  -6   8  -7    2.39    1.28   1 
  -6   8  -8  106.32    4.85   1 
  -6   8  -9   52.14    3.64   1 
  -6   8 -10  113.45    5.19   1 
  -6   8 -11  104.22    5.04   1 
  -6   8 -12   22.31    2.65   1 
  -6   8 -13  100.02    5.19   1 
  -6   8 -14   89.17    4.99   1 
  -6   8 -15    0.39    1.40   1 
  -6   8 -16    7.12    2.10   1 
  -6   8 -17    1.03    1.55   1 
   6  -7 -23    5.47    3.08   1 
   6  -7 -22    0.22    2.38   1 
   6  -7 -21   10.48    3.46   1 
   6  -7 -20    9.84    3.10   1 
   6  -7 -19   52.52    5.54   1 
   6  -7 -18    0.16    1.75   1 
   6  -7 -17    2.91    1.99   1 
   6  -7 -16    0.07    1.55   1 
   6  -7 -15    5.65    2.04   1 
   6  -7 -14   62.41    5.10   1 
   6  -7 -13    6.98    2.11   1 
   6  -7 -12  107.25    6.22   1 
   6  -7 -11   -0.18    1.12   1 
   6  -7 -10  123.44    6.28   1 
   6  -7  -9    1.12    1.19   1 
   6  -7  -8   23.07    2.70   1 
   6  -7  -7   46.53    3.58   1 
   6  -7  -6    1.54    1.04   1 
   6  -7  -5  117.90    5.34   1 
   6  -7  -4  340.36    8.90   1 
   6  -7  -3    0.36    0.88   1 
   6  -7  -2  341.44    8.55   1 
   6  -7  -1   57.71    3.47   1 
   6  -7   0   68.88    3.70   1 
   6  -7   1    0.02    0.77   1 
   6  -7   2    7.27    1.44   1 
   6  -7   3    6.82    1.45   1 
   6  -7   4   91.69    4.16   1 
   6  -7   5   15.32    1.88   1 
   6  -7   6  176.17    5.80   1 
  -6   7  -7    1.27    1.12   1 
  -6   7  -8  139.16    5.61   1 
  -6   7  -9    1.46    1.20   1 
  -6   7 -10   23.77    2.64   1 
  -6   7 -11    8.62    1.96   1 
  -6   7 -12    0.39    1.24   1 
  -6   7 -13    0.73    1.31   1 
  -6   7 -14    5.01    1.86   1 
  -6   7 -15    1.43    1.52   1 
  -6   7 -16    6.58    2.10   1 
  -6   7 -17   14.70    2.80   1 
  -6   7 -18   13.44    2.86   1 
  -6   7 -19   27.71    3.77   1 
   6  -6 -24    1.70    2.58   1 
   6  -6 -23    1.88    2.50   1 
   6  -6 -22    2.99    2.67   1 
   6  -6 -21    5.28    2.56   1 
   6  -6 -20   22.83    4.07   1 
   6  -6 -19    0.17    1.66   1 
   6  -6 -18    1.44    1.88   1 
   6  -6 -17    2.37    1.88   1 
   6  -6 -16    0.64    1.56   1 
   6  -6 -15    6.51    2.07   1 
   6  -6 -14    8.35    2.28   1 
   6  -6 -13   28.13    3.60   1 
   6  -6 -12   30.61    3.36   1 
   6  -6 -11   42.68    3.86   1 
   6  -6 -10    1.27    1.23   1 
   6  -6  -9    1.05    1.11   1 
   6  -6  -8    4.75    1.43   1 
   6  -6  -7    5.09    1.56   1 
   6  -6  -6    5.11    1.48   1 
   6  -6  -5   12.11    1.97   1 
   6  -6  -4    0.55    0.91   1 
   6  -6  -3    9.24    1.71   1 
   6  -6  -2   25.32    2.41   1 
   6  -6  -1  122.49    4.94   1 
   6  -6   0    0.97    0.89   1 
   6  -6   1  152.34    5.37   1 
   6  -6   2   24.53    2.25   1 
   6  -6   3    5.48    1.32   1 
   6  -6   4    0.20    0.83   1 
   6  -6   5    0.68    0.79   1 
  -6   6  -6    1.65    1.17   1 
  -6   6  -7   79.17    4.32   1 
  -6   6  -8   16.55    2.36   1 
  -6   6  -9  146.32    6.08   1 
  -6   6 -10   98.44    5.05   1 
  -6   6 -11  107.32    5.39   1 
  -6   6 -12  107.95    5.54   1 
  -6   6 -13   54.44    4.08   1 
  -6   6 -14   22.97    3.16   1 
  -6   6 -15   32.15    3.52   1 
  -6   6 -16    4.38    1.96   1 
  -6   6 -17  138.21    7.12   1 
  -6   6 -18   -0.17    1.76   1 
  -6   6 -19   68.77    5.30   1 
  -6   6 -20    2.62    2.02   1 
  -6   6 -21    3.39    2.36   1 
   6  -5 -25    6.14    3.25   1 
   6  -5 -24    6.07    3.18   1 
   6  -5 -23   40.65    5.70   1 
   6  -5 -22   11.10    3.43   1 
   6  -5 -21   61.89    6.18   1 
   6  -5 -20    1.53    2.00   1 
   6  -5 -19   31.11    4.54   1 
   6  -5 -18    8.84    2.71   1 
   6  -5 -17    1.55    1.59   1 
   6  -5 -16    6.21    2.25   1 
   6  -5 -15    2.66    1.63   1 
   6  -5 -14   61.72    4.92   1 
   6  -5 -13   41.80    3.98   1 
   6  -5 -12   86.25    5.43   1 
   6  -5 -11    7.03    1.90   1 
   6  -5 -10    2.30    1.26   1 
   6  -5  -9   17.21    2.46   1 
   6  -5  -8    8.35    1.89   1 
   6  -5  -7  120.33    5.56   1 
   6  -5  -6   11.39    1.99   1 
   6  -5  -5   52.72    3.58   1 
   6  -5  -4   34.86    2.88   1 
   6  -5  -3   -0.07    0.76   1 
   6  -5  -2    0.27    0.72   1 
   6  -5  -1   34.68    2.67   1 
   6  -5   0    0.15    0.81   1 
   6  -5   1  148.31    5.34   1 
   6  -5   2   22.61    2.17   1 
   6  -5   3   69.97    3.75   1 
   6  -5   4   72.43    3.79   1 
   6  -5   5   19.90    2.20   1 
  -6   5  -6   41.75    3.27   1 
  -6   5  -7   65.61    4.05   1 
  -6   5  -8    5.54    1.65   1 
  -6   5  -9   -0.26    1.03   1 
  -6   5 -10    7.16    1.89   1 
  -6   5 -11   13.65    2.36   1 
  -6   5 -12   40.42    3.66   1 
  -6   5 -13    5.13    1.80   1 
  -6   5 -14   24.97    3.22   1 
  -6   5 -15    3.27    1.85   1 
  -6   5 -16    1.20    1.73   1 
  -6   5 -17    2.26    1.91   1 
  -6   5 -18    0.82    1.88   1 
  -6   5 -19   12.15    2.87   1 
  -6   5 -20    1.43    2.04   1 
  -6   5 -21   28.59    4.35   1 
  -6   5 -22   17.78    3.51   1 
   6  -4 -25    7.23    3.38   1 
   6  -4 -24    0.98    2.47   1 
   6  -4 -23   -0.88    2.06   1 
   6  -4 -22    0.70    2.08   1 
   6  -4 -21    1.06    2.02   1 
   6  -4 -20    0.33    1.89   1 
   6  -4 -19    0.22    1.72   1 
   6  -4 -18    1.96    1.75   1 
   6  -4 -17    3.38    1.80   1 
   6  -4 -16    2.34    1.65   1 
   6  -4 -15    5.59    1.93   1 
   6  -4 -14    7.16    2.00   1 
   6  -4 -13   11.45    2.37   1 
   6  -4 -12    1.87    1.24   1 
   6  -4 -11    8.15    1.91   1 
   6  -4 -10   44.03    3.59   1 
   6  -4  -9    4.58    1.49   1 
   6  -4  -8   13.89    2.16   1 
   6  -4  -7   77.58    4.41   1 
   6  -4  -6    0.91    0.96   1 
   6  -4  -5  135.61    5.51   1 
   6  -4  -4   32.58    2.75   1 
   6  -4  -3    2.12    1.04   1 
   6  -4  -2   13.94    1.92   1 
   6  -4  -1    0.35    0.78   1 
   6  -4   0   40.39    2.88   1 
   6  -4   1   33.86    2.65   1 
   6  -4   2   -0.05    0.73   1 
   6  -4   3    4.95    1.25   1 
   6  -4   4    9.86    1.73   1 
  -6   4  -5    2.10    1.22   1 
   6  -4   5    2.12    1.06   1 
  -6   4  -6    4.00    1.38   1 
  -6   4  -7   83.27    4.58   1 
  -6   4  -8   12.28    2.23   1 
  -6   4  -9   78.69    4.66   1 
  -6   4 -10   24.40    2.88   1 
  -6   4 -11   25.92    2.98   1 
  -6   4 -12    4.82    1.80   1 
  -6   4 -13   27.21    3.25   1 
  -6   4 -14   13.48    2.65   1 
  -6   4 -15  150.17    7.33   1 
  -6   4 -16   33.46    3.92   1 
  -6   4 -17  184.44    8.56   1 
  -6   4 -18    4.57    2.42   1 
  -6   4 -19   30.40    4.11   1 
  -6   4 -20   15.55    3.25   1 
  -6   4 -21    0.29    2.16   1 
  -6   4 -22   14.66    3.33   1 
  -6   4 -23    4.43    2.77   1 
  -6   4 -24    4.79    2.78   1 
   6  -3 -26   39.83    5.93   1 
   6  -3 -25   81.52    7.52   1 
   6  -3 -24   52.91    6.02   1 
   6  -3 -23   86.28    7.34   1 
   6  -3 -22    9.54    3.03   1 
   6  -3 -21   12.78    3.08   1 
   6  -3 -20   -0.01    1.68   1 
   6  -3 -19   14.83    3.16   1 
   6  -3 -18   12.50    2.84   1 
   6  -3 -17   15.50    3.04   1 
   6  -3 -16  100.33    6.35   1 
   6  -3 -15  163.82    7.80   1 
   6  -3 -14  101.98    5.97   1 
   6  -3 -13  101.45    5.78   1 
   6  -3 -12    4.05    1.53   1 
   6  -3 -11    1.32    1.07   1 
   6  -3 -10    0.08    0.92   1 
   6  -3  -9    0.09    0.92   1 
   6  -3  -8   81.10    4.53   1 
   6  -3  -7    3.13    1.21   1 
   6  -3  -6   47.66    3.34   1 
   6  -3  -5   71.94    4.03   1 
   6  -3  -4   16.30    2.03   1 
   6  -3  -3    1.72    0.90   1 
   6  -3  -2   70.40    3.83   1 
   6  -3  -1   11.63    1.75   1 
   6  -3   0    1.74    0.95   1 
   6  -3   1   36.48    2.70   1 
   6  -3   2   34.19    2.73   1 
   6  -3   3    4.63    1.31   1 
   6  -3   4   23.50    2.34   1 
  -6   3  -5    0.14    0.99   1 
  -6   3  -6   24.68    2.68   1 
  -6   3  -7    2.09    1.37   1 
  -6   3  -8   53.19    3.90   1 
  -6   3  -9   84.54    4.93   1 
  -6   3 -10   19.82    2.77   1 
  -6   3 -11    1.12    1.42   1 
  -6   3 -12   10.48    2.29   1 
  -6   3 -13    1.34    1.46   1 
  -6   3 -14    4.38    1.93   1 
  -6   3 -15   12.08    2.68   1 
  -6   3 -16    1.43    1.79   1 
  -6   3 -17    0.58    1.80   1 
  -6   3 -18    0.54    1.84   1 
  -6   3 -19    4.70    2.43   1 
  -6   3 -20   14.06    3.28   1 
  -6   3 -21    4.50    2.51   1 
  -6   3 -22   13.07    3.45   1 
  -6   3 -23   20.58    3.99   1 
  -6   3 -24   18.55    3.93   1 
   6  -2 -26    1.63    2.56   1 
   6  -2 -25    4.68    2.61   1 
   6  -2 -24   -0.68    1.96   1 
   6  -2 -23    4.16    2.29   1 
   6  -2 -22   10.50    2.90   1 
   6  -2 -21   14.43    3.30   1 
   6  -2 -20   20.14    3.57   1 
   6  -2 -19   14.22    3.08   1 
   6  -2 -18   22.33    3.43   1 
   6  -2 -17    0.30    1.18   1 
   6  -2 -16   82.22    5.62   1 
   6  -2 -15    2.40    1.39   1 
   6  -2 -14   22.00    2.95   1 
   6  -2 -13   32.84    3.30   1 
   6  -2 -12   83.56    4.95   1 
   6  -2 -11   51.11    3.86   1 
   6  -2 -10  181.15    6.99   1 
   6  -2  -9    1.33    1.06   1 
   6  -2  -8  125.27    5.57   1 
   6  -2  -7   20.33    2.35   1 
   6  -2  -6  161.74    6.04   1 
   6  -2  -5   12.27    1.88   1 
   6  -2  -4  184.79    6.27   1 
   6  -2  -3    7.14    1.52   1 
   6  -2  -2  262.80    7.35   1 
   6  -2  -1    6.10    1.40   1 
   6  -2   0  413.49    9.24   1 
   6  -2   1   -0.14    0.71   1 
   6  -2   2  218.27    6.73   1 
   6  -2   3    1.49    1.00   1 
  -6   2  -4   -0.06    1.02   1 
   6  -2   4   -0.09    0.81   1 
  -6   2  -5  142.68    6.02   1 
  -6   2  -6    1.36    1.21   1 
  -6   2  -7  101.55    5.28   1 
  -6   2  -8   36.06    3.35   1 
  -6   2  -9    8.88    2.09   1 
  -6   2 -10    5.69    1.85   1 
  -6   2 -11   -0.41    1.26   1 
  -6   2 -12   29.09    3.31   1 
  -6   2 -13   79.63    5.34   1 
  -6   2 -14    4.57    2.01   1 
  -6   2 -15  110.74    6.69   1 
  -6   2 -16    1.51    1.87   1 
  -6   2 -17   17.62    3.40   1 
  -6   2 -18    2.91    2.09   1 
  -6   2 -19    0.18    1.99   1 
  -6   2 -20   15.21    3.28   1 
  -6   2 -21    0.11    2.25   1 
  -6   2 -22   44.28    5.17   1 
  -6   2 -23    1.97    2.62   1 
   6  -1 -27    6.45    3.22   1 
   6  -1 -26   61.21    6.63   1 
   6  -1 -25   67.44    6.65   1 
   6  -1 -24   41.19    5.53   1 
   6  -1 -23    4.48    2.50   1 
   6  -1 -22   14.12    3.29   1 
   6  -1 -21    0.01    1.60   1 
   6  -1 -20   80.20    6.13   1 
   6  -1 -19    6.41    2.16   1 
   6  -1 -18  288.35   10.82   1 
   6  -1 -17   34.05    3.82   1 
   6  -1 -16  198.09    8.38   1 
   6  -1 -15   59.01    4.54   1 
   6  -1 -14    7.47    1.97   1 
   6  -1 -13   15.22    2.45   1 
   6  -1 -12   17.24    2.51   1 
   6  -1 -11    2.22    1.19   1 
   6  -1 -10  336.82    9.43   1 
   6  -1  -9   27.99    2.76   1 
   6  -1  -8  397.65    9.95   1 
   6  -1  -7  126.18    5.43   1 
   6  -1  -6   40.61    3.07   1 
   6  -1  -5   34.57    2.82   1 
   6  -1  -4    1.21    0.83   1 
   6  -1  -3    1.18    0.86   1 
   6  -1  -2    1.54    0.89   1 
   6  -1  -1    8.31    1.56   1 
   6  -1   0  134.01    5.33   1 
   6  -1   1    7.00    1.46   1 
   6  -1   2   24.55    2.46   1 
   6  -1   3  127.56    5.31   1 
  -6   1  -4   46.62    3.50   1 
  -6   1  -5    8.99    1.97   1 
  -6   1  -6   97.54    5.15   1 
  -6   1  -7   11.60    2.16   1 
  -6   1  -8   18.21    2.74   1 
  -6   1  -9    2.24    1.53   1 
  -6   1 -10   -0.03    1.26   1 
  -6   1 -11   70.33    4.91   1 
  -6   1 -12   62.29    4.75   1 
  -6   1 -13   34.53    3.78   1 
  -6   1 -14   19.01    3.20   1 
  -6   1 -15   21.82    3.47   1 
  -6   1 -16    0.46    1.73   1 
  -6   1 -17   15.22    3.21   1 
  -6   1 -18    5.63    2.52   1 
  -6   1 -19   15.64    3.31   1 
  -6   1 -20    2.38    2.22   1 
  -6   1 -21    3.08    2.57   1 
  -6   1 -22   -0.38    2.36   1 
  -6   1 -23    7.04    3.01   1 
   6   0 -27   -0.17    2.33   1 
   6   0 -26   15.90    3.70   1 
   6   0 -25   19.35    4.01   1 
   6   0 -24    2.68    2.29   1 
   6   0 -23   30.76    4.56   1 
   6   0 -22    0.42    1.72   1 
   6   0 -21   10.23    2.64   1 
   6   0 -20    0.96    1.58   1 
   6   0 -19    0.49    1.45   1 
   6   0 -18    2.71    1.74   1 
   6   0 -17    6.68    2.04   1 
   6   0 -16   45.40    4.00   1 
   6   0 -15   60.88    4.46   1 
   6   0 -14   57.92    4.20   1 
   6   0 -13  126.70    6.10   1 
   6   0 -12  121.44    5.86   1 
   6   0 -11   23.50    2.61   1 
   6   0 -10   40.77    3.36   1 
   6   0  -9   12.75    2.10   1 
   6   0  -8    1.79    1.08   1 
   6   0  -7   87.41    4.50   1 
   6   0  -6   94.50    4.59   1 
   6   0  -5   93.15    4.45   1 
   6   0  -4  480.48   10.23   1 
   6   0  -3   37.04    2.89   1 
   6   0  -2  345.43    8.52   1 
   6   0  -1    2.02    0.97   1 
   6   0   0  600.02   11.65   1 
   6   0   1   65.03    3.83   1 
   6   0   2  164.80    6.08   1 
  -6   0  -3  338.70    9.43   1 
  -6   0  -4   57.57    4.02   1 
  -6   0  -5  290.97    8.88   1 
  -6   0  -6   65.06    4.39   1 
  -6   0  -7    0.78    1.23   1 
  -6   0  -8    2.33    1.37   1 
  -6   0  -9   18.23    2.81   1 
  -6   0 -10   23.32    3.12   1 
  -6   0 -11   18.13    3.01   1 
  -6   0 -12    9.26    2.44   1 
  -6   0 -13   69.59    5.29   1 
  -6   0 -14    0.91    1.69   1 
  -6   0 -15   18.30    3.26   1 
  -6   0 -16    8.90    2.79   1 
  -6   0 -17    3.52    2.31   1 
  -6   0 -18   -0.75    1.95   1 
  -6   0 -19   12.76    3.29   1 
  -6   0 -20    6.72    2.97   1 
  -6   0 -21   -0.98    2.16   1 
  -6   0 -22    6.25    3.17   1 
   6   1 -28    2.93    2.88   1 
   6   1 -27   25.83    4.74   1 
   6   1 -26   15.49    3.76   1 
   6   1 -25   16.77    3.74   1 
   6   1 -24    3.06    2.32   1 
   6   1 -23    5.18    2.35   1 
   6   1 -22   36.56    4.31   1 
   6   1 -21   23.49    3.71   1 
   6   1 -20  129.50    7.38   1 
   6   1 -19    6.51    2.01   1 
   6   1 -18  127.64    6.86   1 
   6   1 -17    7.07    1.92   1 
   6   1 -16    7.53    1.91   1 
   6   1 -15    9.40    2.05   1 
   6   1 -14    5.09    1.58   1 
   6   1 -13    1.59    1.20   1 
   6   1 -12   96.18    5.14   1 
   6   1 -11    0.27    0.89   1 
   6   1 -10  244.72    7.88   1 
   6   1  -9    0.54    0.91   1 
   6   1  -8  192.71    6.74   1 
   6   1  -7   16.41    2.15   1 
   6   1  -6   14.00    2.00   1 
   6   1  -5    0.54    0.88   1 
   6   1  -4   13.25    1.88   1 
   6   1  -3   29.85    2.58   1 
   6   1  -2  172.57    6.08   1 
   6   1  -1    7.92    1.57   1 
   6   1   0  105.90    4.83   1 
   6   1   1   43.40    3.23   1 
   6   1   2    0.36    0.94   1 
  -6  -1  -3  143.35    6.14   1 
  -6  -1  -4   13.09    2.30   1 
  -6  -1  -5   68.43    4.46   1 
  -6  -1  -6    0.29    1.23   1 
  -6  -1  -7   77.02    4.90   1 
  -6  -1  -8    0.62    1.27   1 
  -6  -1  -9   91.75    5.52   1 
  -6  -1 -10    5.71    2.06   1 
  -6  -1 -11  155.16    7.45   1 
  -6  -1 -12   24.95    3.58   1 
  -6  -1 -13  115.19    6.84   1 
  -6  -1 -14    9.07    2.70   1 
  -6  -1 -15   49.54    4.85   1 
  -6  -1 -16   58.21    5.44   1 
  -6  -1 -17   41.02    4.58   1 
  -6  -1 -18   15.47    3.46   1 
  -6  -1 -19   40.01    4.83   1 
  -6  -1 -20   -0.64    2.32   1 
  -6  -1 -21    9.51    3.21   1 
  -6  -1 -22    0.85    2.65   1 
   6   2 -28   12.86    3.76   1 
   6   2 -27   24.41    4.55   1 
   6   2 -26    4.17    2.57   1 
   6   2 -25   -0.14    1.95   1 
   6   2 -24   -0.09    1.72   1 
   6   2 -23    0.60    1.78   1 
   6   2 -22    3.06    1.97   1 
   6   2 -21   43.99    4.45   1 
   6   2 -20   -0.44    1.17   1 
   6   2 -19   23.00    3.35   1 
   6   2 -18    5.08    1.82   1 
   6   2 -17    0.67    1.21   1 
   6   2 -16    3.00    1.44   1 
   6   2 -15   15.59    2.52   1 
   6   2 -14   64.14    4.36   1 
   6   2 -13    1.12    1.01   1 
   6   2 -12    7.14    1.65   1 
   6   2 -11   10.55    1.91   1 
   6   2 -10    0.28    0.78   1 
   6   2  -9   84.56    4.50   1 
   6   2  -8   11.37    1.85   1 
   6   2  -7  228.29    7.14   1 
   6   2  -6  106.77    4.87   1 
   6   2  -5   53.64    3.45   1 
   6   2  -4   71.36    3.95   1 
   6   2  -3    1.37    0.85   1 
   6   2  -2   92.22    4.52   1 
   6   2  -1   81.02    4.26   1 
   6   2   0   33.71    2.88   1 
   6   2   1  500.05   10.99   1 
  -6  -2  -2   20.20    2.74   1 
  -6  -2  -3  413.79   10.63   1 
  -6  -2  -4  232.25    8.05   1 
  -6  -2  -5  192.16    7.52   1 
  -6  -2  -6   30.49    3.28   1 
  -6  -2  -7   72.27    4.88   1 
  -6  -2  -8   -0.01    1.27   1 
  -6  -2  -9   63.17    4.79   1 
  -6  -2 -10    3.83    1.95   1 
  -6  -2 -11  132.86    7.09   1 
  -6  -2 -12   -0.78    1.52   1 
  -6  -2 -13    3.06    1.95   1 
  -6  -2 -14   74.25    5.77   1 
  -6  -2 -15   -0.27    1.90   1 
  -6  -2 -16   33.04    4.56   1 
  -6  -2 -17    5.62    2.67   1 
  -6  -2 -18   -0.99    2.08   1 
  -6  -2 -19    1.72    2.30   1 
  -6  -2 -20   -0.86    2.43   1 
  -6  -2 -21    2.28    2.67   1 
   6   3 -29   44.57    6.00   1 
   6   3 -28   -1.54    2.16   1 
   6   3 -27    6.56    2.73   1 
   6   3 -26    4.94    2.43   1 
   6   3 -25    0.21    1.80   1 
   6   3 -24    0.33    1.86   1 
   6   3 -23    1.58    1.66   1 
   6   3 -22   51.98    4.85   1 
   6   3 -21    0.46    1.36   1 
   6   3 -20   43.88    4.22   1 
   6   3 -19    2.71    1.59   1 
   6   3 -18    4.50    1.79   1 
   6   3 -17    8.59    2.17   1 
   6   3 -16    4.49    1.70   1 
   6   3 -15   28.08    3.01   1 
   6   3 -14   16.05    2.37   1 
   6   3 -13    3.45    1.40   1 
   6   3 -12   38.77    3.25   1 
   6   3 -11    2.63    1.19   1 
   6   3 -10    9.56    1.78   1 
   6   3  -9    0.43    0.86   1 
   6   3  -8    2.26    1.13   1 
   6   3  -7    6.57    1.45   1 
   6   3  -6    0.49    0.87   1 
   6   3  -5  122.49    5.21   1 
   6   3  -4   24.38    2.40   1 
   6   3  -3   99.32    4.73   1 
   6   3  -2   21.46    2.34   1 
   6   3  -1   17.78    2.13   1 
   6   3   0   39.68    3.14   1 
  -6  -3  -1    4.31    1.59   1 
  -6  -3  -2   14.97    2.50   1 
  -6  -3  -3    0.77    1.16   1 
  -6  -3  -4   16.14    2.59   1 
  -6  -3  -5    5.83    1.78   1 
  -6  -3  -6    2.41    1.54   1 
  -6  -3  -7   38.53    3.67   1 
  -6  -3  -8    0.91    1.41   1 
  -6  -3  -9   76.07    5.24   1 
  -6  -3 -10    6.12    2.17   1 
  -6  -3 -11  120.24    6.82   1 
  -6  -3 -12   15.62    3.12   1 
  -6  -3 -13   44.83    4.69   1 
  -6  -3 -14   57.64    5.37   1 
  -6  -3 -15   44.33    4.84   1 
  -6  -3 -16   37.85    4.71   1 
  -6  -3 -17   64.47    5.99   1 
  -6  -3 -18    4.33    2.43   1 
  -6  -3 -19   25.37    4.42   1 
  -6  -3 -20    7.79    3.17   1 
  -6  -3 -21    3.87    2.99   1 
   6   4 -29    9.94    3.41   1 
   6   4 -28   -0.30    2.15   1 
   6   4 -27    1.03    2.09   1 
   6   4 -26    9.78    2.95   1 
   6   4 -25    0.94    1.74   1 
   6   4 -24   22.99    3.71   1 
   6   4 -23   33.74    4.26   1 
   6   4 -22    6.36    2.08   1 
   6   4 -21   42.87    4.20   1 
   6   4 -20    0.49    1.31   1 
   6   4 -19   -0.19    1.21   1 
   6   4 -18    2.81    1.51   1 
   6   4 -17   21.56    2.98   1 
   6   4 -16   52.62    4.02   1 
   6   4 -15   23.49    2.79   1 
   6   4 -14   -0.28    0.96   1 
   6   4 -13  106.43    5.36   1 
   6   4 -12   51.36    3.66   1 
   6   4 -11   24.45    2.56   1 
   6   4 -10   10.40    1.86   1 
   6   4  -9   66.78    3.99   1 
   6   4  -8    9.87    1.75   1 
   6   4  -7    0.59    0.87   1 
   6   4  -6   53.68    3.47   1 
   6   4  -5   13.22    1.97   1 
   6   4  -4    4.34    1.30   1 
   6   4  -3    0.30    0.90   1 
   6   4  -2   12.07    1.92   1 
   6   4  -1  115.12    5.23   1 
   6   4   0    2.05    1.20   1 
  -6  -4  -1  163.62    6.77   1 
  -6  -4  -2   71.10    4.55   1 
  -6  -4  -3   17.30    2.62   1 
  -6  -4  -4   48.01    4.01   1 
  -6  -4  -5    0.10    1.24   1 
  -6  -4  -6  132.82    6.63   1 
  -6  -4  -7  134.86    6.84   1 
  -6  -4  -8  120.07    6.63   1 
  -6  -4  -9   83.46    5.67   1 
  -6  -4 -10   31.94    3.80   1 
  -6  -4 -11   14.24    3.05   1 
  -6  -4 -12    4.19    2.16   1 
  -6  -4 -13    4.83    2.39   1 
  -6  -4 -14    8.62    2.83   1 
  -6  -4 -15   19.29    3.72   1 
  -6  -4 -16    0.62    2.18   1 
  -6  -4 -17    0.17    2.22   1 
  -6  -4 -18    1.23    2.21   1 
  -6  -4 -19   16.59    3.93   1 
  -6  -4 -20   11.02    3.51   1 
   6   5 -29   20.09    4.26   1 
   6   5 -28    0.83    2.17   1 
   6   5 -27   28.82    4.41   1 
   6   5 -26    0.26    1.84   1 
   6   5 -25    5.48    2.37   1 
   6   5 -24   51.50    4.93   1 
   6   5 -23   15.73    3.00   1 
   6   5 -22   44.10    4.30   1 
   6   5 -21   42.66    4.08   1 
   6   5 -20   -0.46    1.24   1 
   6   5 -19    6.93    1.98   1 
   6   5 -18   33.78    3.42   1 
   6   5 -17   10.52    2.14   1 
   6   5 -16   -0.01    1.03   1 
   6   5 -15    2.21    1.27   1 
   6   5 -14    0.62    1.02   1 
   6   5 -13    2.73    1.20   1 
   6   5 -12    3.67    1.37   1 
   6   5 -11    0.28    0.89   1 
   6   5 -10   15.36    2.13   1 
   6   5  -9    1.08    0.92   1 
   6   5  -8   21.13    2.29   1 
   6   5  -7   59.29    3.66   1 
   6   5  -6   25.36    2.53   1 
   6   5  -5   90.36    4.52   1 
   6   5  -4    1.55    1.04   1 
   6   5  -3    2.47    1.17   1 
   6   5  -2  228.05    7.44   1 
   6   5  -1   39.10    3.25   1 
  -6  -5   0  184.76    7.19   1 
  -6  -5  -1   18.99    2.61   1 
  -6  -5  -2   29.20    3.17   1 
  -6  -5  -3    0.13    1.10   1 
  -6  -5  -4    0.68    1.16   1 
  -6  -5  -5    1.58    1.27   1 
  -6  -5  -6    0.89    1.42   1 
  -6  -5  -7    5.85    1.96   1 
  -6  -5  -8   -0.39    1.42   1 
  -6  -5  -9   30.01    3.56   1 
  -6  -5 -10    0.13    1.62   1 
  -6  -5 -11    3.62    2.11   1 
  -6  -5 -12   14.77    3.27   1 
  -6  -5 -13    2.46    2.11   1 
  -6  -5 -14   38.21    4.66   1 
  -6  -5 -15   22.84    4.09   1 
  -6  -5 -16   21.97    4.17   1 
  -6  -5 -17   17.17    3.80   1 
  -6  -5 -18   11.43    3.47   1 
  -6  -5 -19   -0.54    2.44   1 
  -6  -5 -20   27.80    4.95   1 
   6   6 -30    0.33    2.44   1 
   6   6 -29   10.65    3.21   1 
   6   6 -28   15.69    3.57   1 
   6   6 -27   -0.47    1.87   1 
   6   6 -26   18.72    3.46   1 
   6   6 -25    0.09    1.71   1 
   6   6 -24    2.83    1.88   1 
   6   6 -23   -0.62    1.45   1 
   6   6 -22    9.21    2.44   1 
   6   6 -21    8.80    2.31   1 
   6   6 -20   54.22    4.40   1 
   6   6 -19    2.61    1.50   1 
   6   6 -18  123.48    6.29   1 
   6   6 -17   11.98    2.24   1 
   6   6 -16   49.63    3.91   1 
   6   6 -15  178.79    7.04   1 
   6   6 -14  127.73    5.85   1 
   6   6 -13   13.50    2.18   1 
   6   6 -12   62.27    4.00   1 
   6   6 -11   36.42    3.06   1 
   6   6 -10  145.15    5.91   1 
   6   6  -9   76.64    4.28   1 
   6   6  -8  273.35    7.91   1 
   6   6  -7    0.27    0.87   1 
   6   6  -6   57.65    3.66   1 
   6   6  -5    0.33    0.78   1 
   6   6  -4   -0.29    0.81   1 
   6   6  -3   10.16    1.82   1 
   6   6  -2    0.30    0.94   1 
  -6  -6   1  155.37    6.56   1 
  -6  -6   0   24.77    2.78   1 
  -6  -6  -1   -0.53    0.95   1 
  -6  -6  -2   95.41    5.45   1 
  -6  -6  -3   18.56    2.85   1 
  -6  -6  -4   16.84    2.73   1 
  -6  -6  -5    3.57    1.76   1 
  -6  -6  -6  111.33    6.36   1 
  -6  -6  -7   89.31    5.83   1 
  -6  -6  -8   39.77    4.09   1 
  -6  -6  -9    6.78    2.35   1 
  -6  -6 -10    4.15    2.06   1 
  -6  -6 -11   12.00    2.91   1 
  -6  -6 -12    1.51    1.91   1 
  -6  -6 -13   35.23    4.38   1 
  -6  -6 -14    3.98    2.53   1 
  -6  -6 -15    2.70    2.39   1 
  -6  -6 -16   17.48    3.88   1 
  -6  -6 -17    0.14    2.20   1 
  -6  -6 -18   -0.29    2.46   1 
  -6  -6 -19    2.18    2.67   1 
   6   7 -30    3.16    2.86   1 
   6   7 -29   -0.70    2.17   1 
   6   7 -28    1.06    2.16   1 
   6   7 -27    1.50    2.14   1 
   6   7 -26   52.60    5.29   1 
   6   7 -25    1.03    1.77   1 
   6   7 -24   71.82    5.52   1 
   6   7 -23   65.50    5.25   1 
   6   7 -22   23.74    3.40   1 
   6   7 -21   44.17    4.07   1 
   6   7 -20    2.86    1.64   1 
   6   7 -19    0.09    1.20   1 
   6   7 -18   25.15    2.96   1 
   6   7 -17    0.04    1.08   1 
   6   7 -16   78.62    4.79   1 
   6   7 -15   19.37    2.64   1 
   6   7 -14   12.91    2.18   1 
   6   7 -13   10.35    1.94   1 
   6   7 -12    3.39    1.34   1 
   6   7 -11   15.46    2.25   1 
   6   7 -10   61.14    3.88   1 
   6   7  -9    0.97    1.01   1 
   6   7  -8    0.92    1.00   1 
   6   7  -7   21.04    2.35   1 
   6   7  -6    2.20    1.14   1 
   6   7  -5   23.33    2.49   1 
   6   7  -4   27.13    2.70   1 
   6   7  -3   89.49    4.76   1 
  -6  -7   2  174.07    6.93   1 
  -6  -7   1   77.77    4.81   1 
  -6  -7   0   18.55    2.79   1 
  -6  -7  -1   11.92    2.35   1 
  -6  -7  -2    5.76    1.92   1 
  -6  -7  -3   75.84    5.14   1 
  -6  -7  -4    0.47    1.34   1 
  -6  -7  -5  191.65    8.25   1 
  -6  -7  -6    8.59    2.44   1 
  -6  -7  -7   34.95    3.94   1 
  -6  -7  -8    8.55    2.49   1
[truncated: 1,656,550 more chars]
