# Supplementary material
Source: MDPI journal article supplement (https://www.mdpi.com/2304-6740/10/10/158)
Supplement: s1 [file s1 › 5a.cif]

 
data_rucb8pm 
  
_audit_creation_method            'SHELXL-2014/7' 
_shelx_SHELXL_version_number      '2014/7' 
_chemical_name_systematic         ? 
_chemical_name_common             ? 
_chemical_melting_point           ? 
_chemical_formula_moiety          
 'C44 H45 B8 Cl O P2 Ru, 2(C H2 Cl2)' 
_chemical_formula_sum 
 'C46 H49 B8 Cl5 O P2 Ru' 
_chemical_formula_weight          1044.59 
  
loop_ 
 _atom_type_symbol 
 _atom_type_description 
 _atom_type_scat_dispersion_real 
 _atom_type_scat_dispersion_imag 
 _atom_type_scat_source 
 'C'  'C'   0.0033   0.0016 
 'International Tables Vol C Tables 4.2.6.8 and 6.1.1.4' 
 'H'  'H'   0.0000   0.0000 
 'International Tables Vol C Tables 4.2.6.8 and 6.1.1.4' 
 'B'  'B'   0.0013   0.0007 
 'International Tables Vol C Tables 4.2.6.8 and 6.1.1.4' 
 'O'  'O'   0.0106   0.0060 
 'International Tables Vol C Tables 4.2.6.8 and 6.1.1.4' 
 'P'  'P'   0.1023   0.0942 
 'International Tables Vol C Tables 4.2.6.8 and 6.1.1.4' 
 'Cl'  'Cl'   0.1484   0.1585 
 'International Tables Vol C Tables 4.2.6.8 and 6.1.1.4' 
 'Ru'  'Ru'  -1.2594   0.8363 
 'International Tables Vol C Tables 4.2.6.8 and 6.1.1.4' 
  
_space_group_crystal_system       monoclinic 
_space_group_IT_number            14 
_space_group_name_H-M_alt         'P 21/c' 
_space_group_name_Hall            '-P 2ybc' 
  
_shelx_space_group_comment 
; 
The symmetry employed for this shelxl refinement is uniquely defined 
by the following loop, which should always be used as a source of 
symmetry information in preference to the above space-group names. 
They are only intended as comments. 
; 
  
loop_ 
 _space_group_symop_operation_xyz 
 'x, y, z' 
 '-x, y+1/2, -z+1/2' 
 '-x, -y, -z' 
 'x, -y-1/2, z-1/2' 
  
_cell_length_a                    18.467(11) 
_cell_length_b                    15.515(9) 
_cell_length_c                    18.611(11) 
_cell_angle_alpha                 90 
_cell_angle_beta                  100.170(11) 
_cell_angle_gamma                 90 
_cell_volume                      5249(5) 
_cell_formula_units_Z             4 
_cell_measurement_temperature     110(2) 
_cell_measurement_reflns_used     990 
_cell_measurement_theta_min       2.5 
_cell_measurement_theta_max       23.0 
  
_exptl_crystal_description        prism 
_exptl_crystal_colour             red 
_exptl_crystal_density_meas       ? 
_exptl_crystal_density_method     ? 
_exptl_crystal_density_diffrn     1.322 
_exptl_crystal_F_000              2128 
_exptl_transmission_factor_min    ? 
_exptl_transmission_factor_max    ? 
_exptl_crystal_size_max           0.480 
_exptl_crystal_size_mid           0.320 
_exptl_crystal_size_min           0.260 
_exptl_absorpt_coefficient_mu     0.647 
_shelx_estimated_absorpt_T_min    0.746 
_shelx_estimated_absorpt_T_max    0.850 
_exptl_absorpt_correction_type    multi-scan 
_exptl_absorpt_correction_T_min   0.560 
_exptl_absorpt_correction_T_max   0.928 
_exptl_absorpt_process_details    ? 
_exptl_absorpt_special_details    ? 
_diffrn_ambient_temperature       110(2) 
_diffrn_radiation_wavelength      0.71073 
_diffrn_radiation_type            MoK\a 
_diffrn_source                    ? 
_diffrn_measurement_device_type   'Bruker SMART 1000 CCD area detector' 
_diffrn_measurement_method        'phi and omega scans' 
_diffrn_detector_area_resol_mean  ? 
_diffrn_reflns_number             45233 
_diffrn_reflns_av_unetI/netI      0.1663 
_diffrn_reflns_av_R_equivalents   0.1263 
_diffrn_reflns_limit_h_min        -22 
_diffrn_reflns_limit_h_max        22 
_diffrn_reflns_limit_k_min        -19 
_diffrn_reflns_limit_k_max        19 
_diffrn_reflns_limit_l_min        -22 
_diffrn_reflns_limit_l_max        22 
_diffrn_reflns_theta_min          1.720 
_diffrn_reflns_theta_max          25.999 
_diffrn_reflns_theta_full         25.242 
_diffrn_measured_fraction_theta_max   0.997 
_diffrn_measured_fraction_theta_full  0.998 
_diffrn_reflns_Laue_measured_fraction_max    0.997 
_diffrn_reflns_Laue_measured_fraction_full   0.998 
_diffrn_reflns_point_group_measured_fraction_max   0.997 
_diffrn_reflns_point_group_measured_fraction_full  0.998 
_reflns_number_total              10275 
_reflns_number_gt                 5005 
_reflns_threshold_expression      'I > 2\s(I)' 
_reflns_Friedel_coverage          0.000 
_reflns_Friedel_fraction_max      . 
_reflns_Friedel_fraction_full     . 
  
_reflns_special_details 
; 
 Reflections were merged by SHELXL according to the crystal 
 class for the calculation of statistics and refinement. 
  
 _reflns_Friedel_fraction is defined as the number of unique 
 Friedel pairs measured divided by the number that would be 
 possible theoretically, ignoring centric projections and 
 systematic absences. 
; 
  
_computing_data_collection        'Bruker SMART' 
_computing_cell_refinement        'Bruker SMART' 
_computing_data_reduction         'Bruker SHELXTL' 
_computing_structure_solution     'Bruker SHELXTL' 
_computing_structure_refinement 'SHELXL-2014/7 (Sheldrick, 2014)' 
_computing_molecular_graphics     'Bruker SHELXTL' 
_computing_publication_material   'Bruker SHELXTL' 
_refine_special_details           ? 
_refine_ls_structure_factor_coef  Fsqd 
_refine_ls_matrix_type            full 
_refine_ls_weighting_scheme       calc 
_refine_ls_weighting_details 
'w=1/[\s^2^(Fo^2^)+(0.1000P)^2^+50.0000P] where P=(Fo^2^+2Fc^2^)/3' 
_atom_sites_solution_primary      direct 
_atom_sites_solution_secondary    ? 
_atom_sites_solution_hydrogens    mixed 
_refine_ls_hydrogen_treatment     constr 
_refine_ls_extinction_method      none 
_refine_ls_extinction_coef        . 
_refine_ls_number_reflns          10275 
_refine_ls_number_parameters      602 
_refine_ls_number_restraints      0 
_refine_ls_R_factor_all           0.1814 
_refine_ls_R_factor_gt            0.0987 
_refine_ls_wR_factor_ref          0.2767 
_refine_ls_wR_factor_gt           0.2428 
_refine_ls_goodness_of_fit_ref    1.009 
_refine_ls_restrained_S_all       1.009 
_refine_ls_shift/su_max           0.001 
_refine_ls_shift/su_mean          0.000 
  
loop_ 
 _atom_site_label 
 _atom_site_type_symbol 
 _atom_site_fract_x 
 _atom_site_fract_y 
 _atom_site_fract_z 
 _atom_site_U_iso_or_equiv 
 _atom_site_adp_type 
 _atom_site_occupancy 
 _atom_site_site_symmetry_order 
 _atom_site_calc_flag 
 _atom_site_refinement_flags_posn 
 _atom_site_refinement_flags_adp 
 _atom_site_refinement_flags_occupancy 
 _atom_site_disorder_assembly 
 _atom_site_disorder_group 
Ru1 Ru 0.26126(4) 0.35840(5) 0.60928(4) 0.0266(2) Uani 1 1 d . . . . . 
H1 H 0.2526 0.2726 0.6112 0.032 Uiso 1 1 d R U . . . 
Cl1 Cl 0.30009(12) 0.36511(17) 0.49232(13) 0.0313(6) Uani 1 1 d . . . . . 
P1 P 0.38328(13) 0.31401(17) 0.65049(14) 0.0276(6) Uani 1 1 d . . . . . 
P2 P 0.14131(14) 0.18086(18) 0.62741(14) 0.0287(6) Uani 1 1 d . . . . . 
O1 O 0.3317(4) 0.4610(4) 0.7539(4) 0.0308(16) Uani 1 1 d . . . . . 
C2 C 0.1829(6) 0.4584(7) 0.5652(6) 0.035(2) Uani 1 1 d . . . . . 
B3 B 0.1699(6) 0.2978(8) 0.6366(6) 0.032(3) Uani 1 1 d . . . . . 
B4 B 0.2730(6) 0.4338(7) 0.7040(6) 0.030(3) Uani 1 1 d . . . . . 
B5 B 0.1282(6) 0.3795(7) 0.5753(7) 0.033(3) Uani 1 1 d . . . . . 
H5 H 0.0848 0.3471 0.5150 0.040 Uiso 1 1 d R U . . . 
B6 B 0.2091(5) 0.3546(7) 0.7165(5) 0.020(2) Uani 1 1 d . . . . . 
H6 H 0.2153 0.3133 0.7633 0.024 Uiso 1 1 d R U . . . 
B7 B 0.2201(6) 0.5075(8) 0.6367(7) 0.030(3) Uani 1 1 d . . . . . 
H7 H 0.2362 0.5759 0.6395 0.036 Uiso 1 1 d R U . . . 
B8 B 0.1241(7) 0.4802(8) 0.6255(7) 0.038(3) Uani 1 1 d . . . . . 
H8 H 0.0694 0.5223 0.6066 0.046 Uiso 1 1 d R U . . . 
B9 B 0.1168(6) 0.3805(9) 0.6695(7) 0.043(4) Uani 1 1 d . . . . . 
H9 H 0.0580 0.3506 0.6909 0.052 Uiso 1 1 d R U . . . 
B10 B 0.1801(6) 0.4627(8) 0.7104(7) 0.035(3) Uani 1 1 d . . . . . 
H10 H 0.1780 0.5065 0.7556 0.042 Uiso 1 1 d R U . . . 
C11 C 0.1736(6) 0.5058(7) 0.4952(6) 0.036(3) Uani 1 1 d . . . . . 
C12 C 0.2320(6) 0.5545(6) 0.4770(6) 0.038(3) Uani 1 1 d . . . . . 
H12A H 0.2772 0.5578 0.5103 0.045 Uiso 1 1 calc R U . . . 
C13 C 0.2244(6) 0.5975(7) 0.4115(7) 0.044(3) Uani 1 1 d . . . . . 
H13A H 0.2647 0.6295 0.3998 0.053 Uiso 1 1 calc R U . . . 
C14 C 0.1583(7) 0.5947(8) 0.3618(7) 0.049(3) Uani 1 1 d . . . . . 
H14A H 0.1530 0.6240 0.3164 0.059 Uiso 1 1 calc R U . . . 
C15 C 0.1019(6) 0.5488(7) 0.3806(7) 0.046(3) Uani 1 1 d . . . . . 
H15A H 0.0559 0.5484 0.3483 0.055 Uiso 1 1 calc R U . . . 
C16 C 0.1087(6) 0.5032(7) 0.4442(7) 0.044(3) Uani 1 1 d . . . . . 
H16A H 0.0687 0.4693 0.4537 0.053 Uiso 1 1 calc R U . . . 
C17 C 0.3315(6) 0.4581(7) 0.8306(6) 0.041(3) Uani 1 1 d . . . . . 
H17A H 0.3823 0.4566 0.8571 0.061 Uiso 1 1 calc R U . . . 
H17B H 0.3055 0.4064 0.8422 0.061 Uiso 1 1 calc R U . . . 
H17C H 0.3067 0.5095 0.8451 0.061 Uiso 1 1 calc R U . . . 
C18 C 0.4092(5) 0.2079(7) 0.6197(6) 0.037(3) Uani 1 1 d . . . . . 
C19 C 0.3730(6) 0.1714(7) 0.5536(6) 0.038(3) Uani 1 1 d . . . . . 
H19A H 0.3335 0.2013 0.5245 0.046 Uiso 1 1 calc R U . . . 
C20 C 0.3951(7) 0.0915(7) 0.5309(7) 0.049(3) Uani 1 1 d . . . . . 
H20A H 0.3719 0.0688 0.4851 0.059 Uiso 1 1 calc R U . . . 
C21 C 0.4498(7) 0.0450(8) 0.5735(7) 0.057(4) Uani 1 1 d . . . . . 
H21A H 0.4641 -0.0098 0.5579 0.068 Uiso 1 1 calc R U . . . 
C22 C 0.4839(7) 0.0796(8) 0.6397(7) 0.049(3) Uani 1 1 d . . . . . 
H22A H 0.5210 0.0475 0.6702 0.058 Uiso 1 1 calc R U . . . 
C23 C 0.4648(6) 0.1587(7) 0.6614(7) 0.043(3) Uani 1 1 d . . . . . 
H23A H 0.4900 0.1813 0.7063 0.051 Uiso 1 1 calc R U . . . 
C24 C 0.4137(5) 0.3021(6) 0.7496(5) 0.030(2) Uani 1 1 d . . . . . 
C25 C 0.3749(6) 0.2479(6) 0.7869(6) 0.033(2) Uani 1 1 d . . . . . 
H25A H 0.3319 0.2201 0.7619 0.040 Uiso 1 1 calc R U . . . 
C26 C 0.3979(7) 0.2334(7) 0.8608(6) 0.044(3) Uani 1 1 d . . . . . 
H26A H 0.3706 0.1963 0.8866 0.053 Uiso 1 1 calc R U . . . 
C27 C 0.4591(7) 0.2720(8) 0.8956(6) 0.046(3) Uani 1 1 d . . . . . 
H27A H 0.4742 0.2623 0.9465 0.055 Uiso 1 1 calc R U . . . 
C28 C 0.5011(7) 0.3259(8) 0.8596(6) 0.050(3) Uani 1 1 d . . . . . 
H28A H 0.5451 0.3510 0.8852 0.060 Uiso 1 1 calc R U . . . 
C29 C 0.4779(6) 0.3428(7) 0.7851(6) 0.040(3) Uani 1 1 d . . . . . 
H29A H 0.5048 0.3807 0.7596 0.048 Uiso 1 1 calc R U . . . 
C30 C 0.4503(5) 0.3877(7) 0.6222(5) 0.032(2) Uani 1 1 d . . . . . 
C31 C 0.5086(5) 0.3593(8) 0.5914(5) 0.034(2) Uani 1 1 d . . . . . 
H31A H 0.5149 0.2993 0.5841 0.041 Uiso 1 1 calc R U . . . 
C32 C 0.5574(6) 0.4163(8) 0.5714(6) 0.041(3) Uani 1 1 d . . . . . 
H32A H 0.5970 0.3955 0.5499 0.049 Uiso 1 1 calc R U . . . 
C33 C 0.5504(6) 0.5035(8) 0.5816(5) 0.040(3) Uani 1 1 d . . . . . 
H33A H 0.5847 0.5426 0.5670 0.049 Uiso 1 1 calc R U . . . 
C34 C 0.4930(6) 0.5339(8) 0.6134(6) 0.043(3) Uani 1 1 d . . . . . 
H34A H 0.4882 0.5939 0.6214 0.052 Uiso 1 1 calc R U . . . 
C35 C 0.4428(6) 0.4769(7) 0.6336(6) 0.038(3) Uani 1 1 d . . . . . 
H35A H 0.4032 0.4978 0.6551 0.045 Uiso 1 1 calc R U . . . 
C36 C 0.1294(5) 0.1454(7) 0.5344(5) 0.030(2) Uani 1 1 d . . . . . 
C37 C 0.1571(6) 0.1900(7) 0.4802(6) 0.036(3) Uani 1 1 d . . . . . 
H37A H 0.1834 0.2422 0.4919 0.043 Uiso 1 1 calc R U . . . 
C38 C 0.1467(6) 0.1590(8) 0.4094(6) 0.047(3) Uani 1 1 d . . . . . 
H38A H 0.1636 0.1912 0.3722 0.056 Uiso 1 1 calc R U . . . 
C39 C 0.1125(6) 0.0824(7) 0.3934(6) 0.043(3) Uani 1 1 d . . . . . 
H39A H 0.1067 0.0609 0.3449 0.051 Uiso 1 1 calc R U . . . 
C40 C 0.0856(6) 0.0348(7) 0.4456(6) 0.043(3) Uani 1 1 d . . . . . 
H40A H 0.0612 -0.0185 0.4332 0.052 Uiso 1 1 calc R U . . . 
C41 C 0.0947(5) 0.0658(7) 0.5161(5) 0.031(2) Uani 1 1 d . . . . . 
H41A H 0.0773 0.0330 0.5526 0.037 Uiso 1 1 calc R U . . . 
C42 C 0.0523(6) 0.1639(6) 0.6541(6) 0.032(2) Uani 1 1 d . . . . . 
C43 C -0.0051(6) 0.2128(7) 0.6187(6) 0.039(3) Uani 1 1 d . . . . . 
H43A H 0.0025 0.2531 0.5823 0.047 Uiso 1 1 calc R U . . . 
C44 C -0.0751(7) 0.2024(8) 0.6371(8) 0.052(3) Uani 1 1 d . . . . . 
H44A H -0.1155 0.2351 0.6127 0.062 Uiso 1 1 calc R U . . . 
C45 C -0.0845(6) 0.1464(8) 0.6891(7) 0.052(3) Uani 1 1 d . . . . . 
H45A H -0.1320 0.1407 0.7016 0.063 Uiso 1 1 calc R U . . . 
C46 C -0.0272(7) 0.0960(8) 0.7258(7) 0.052(3) Uani 1 1 d . . . . . 
H46A H -0.0354 0.0563 0.7625 0.062 Uiso 1 1 calc R U . . . 
C47 C 0.0415(6) 0.1050(7) 0.7078(6) 0.044(3) Uani 1 1 d . . . . . 
H47A H 0.0814 0.0712 0.7318 0.053 Uiso 1 1 calc R U . . . 
C48 C 0.2091(5) 0.1144(7) 0.6798(5) 0.034(3) Uani 1 1 d . . . . . 
C49 C 0.2509(5) 0.0569(7) 0.6459(6) 0.036(3) Uani 1 1 d . . . . . 
H49A H 0.2435 0.0542 0.5941 0.043 Uiso 1 1 calc R U . . . 
C50 C 0.3038(6) 0.0030(8) 0.6874(7) 0.052(3) Uani 1 1 d . . . . . 
H50A H 0.3335 -0.0333 0.6635 0.062 Uiso 1 1 calc R U . . . 
C51 C 0.3125(7) 0.0026(8) 0.7612(7) 0.051(3) Uani 1 1 d . . . . . 
H51A H 0.3473 -0.0355 0.7885 0.061 Uiso 1 1 calc R U . . . 
C52 C 0.2717(7) 0.0567(8) 0.7971(6) 0.050(3) Uani 1 1 d . . . . . 
H52A H 0.2790 0.0563 0.8489 0.060 Uiso 1 1 calc R U . . . 
C53 C 0.2187(6) 0.1131(7) 0.7567(6) 0.039(3) Uani 1 1 d . . . . . 
H53A H 0.1900 0.1496 0.7815 0.047 Uiso 1 1 calc R U . . . 
Cl1S Cl 0.7649(4) 0.4054(5) 1.0202(5) 0.103(2) Uani 0.6667 1 d . . P . . 
Cl2S Cl 0.6349(4) 0.3139(7) 1.0302(5) 0.156(4) Uani 0.6667 1 d . . P . . 
C1S C 0.7201(14) 0.319(2) 0.9922(16) 0.132(13) Uani 0.6667 1 d . . P . . 
H1SA H 0.7509 0.2679 1.0078 0.159 Uiso 0.6667 1 calc R U P . . 
H1SB H 0.7082 0.3193 0.9382 0.159 Uiso 0.6667 1 calc R U P . . 
Cl3S Cl 0.1093(5) -0.2821(5) 0.5666(5) 0.112(3) Uani 0.6667 1 d . . P . . 
Cl4S Cl 0.1090(5) -0.1282(5) 0.6503(4) 0.120(3) Uani 0.6667 1 d . . P . . 
C2S C 0.0641(13) -0.2094(17) 0.6026(15) 0.107(11) Uani 0.6667 1 d . . P . . 
H2SA H 0.0355 -0.2394 0.6353 0.128 Uiso 0.6667 1 calc R U P . . 
H2SB H 0.0282 -0.1836 0.5627 0.128 Uiso 0.6667 1 calc R U P . . 
Cl5S Cl 0.3696(5) 0.8032(7) 0.1872(6) 0.087(3) Uani 0.5 1 d . . P A 1 
Cl6S Cl 0.2657(6) 0.7452(7) 0.2697(7) 0.115(4) Uani 0.5 1 d . . P A 1 
Cl5' Cl 0.3501(18) 0.756(2) 0.195(2) 0.087(3) Uani 0.1667 1 d . . P A 2 
Cl6' Cl 0.3023(18) 0.788(2) 0.326(2) 0.115(4) Uani 0.1667 1 d . . P A 2 
C3S C 0.318(2) 0.8161(17) 0.262(2) 0.153(16) Uani 0.6667 1 d . . P . . 
H3SA H 0.3529 0.8241 0.3084 0.183 Uiso 0.5 1 d R U P A 1 
H3SB H 0.2892 0.8701 0.2524 0.183 Uiso 0.5 1 d R U P A 1 
H3SC H 0.2751 0.8469 0.2386 0.183 Uiso 0.1667 1 d R U P A 2 
H3SD H 0.3558 0.8583 0.2753 0.183 Uiso 0.1667 1 d R U P A 2 
  
loop_ 
 _atom_site_aniso_label 
 _atom_site_aniso_U_11 
 _atom_site_aniso_U_22 
 _atom_site_aniso_U_33 
 _atom_site_aniso_U_23 
 _atom_site_aniso_U_13 
 _atom_site_aniso_U_12 
Ru1 0.0204(4) 0.0279(4) 0.0337(5) -0.0009(4) 0.0109(3) -0.0022(4) 
Cl1 0.0286(12) 0.0372(15) 0.0317(13) 0.0004(11) 0.0150(10) -0.0040(12) 
P1 0.0226(13) 0.0273(15) 0.0352(15) -0.0009(12) 0.0113(11) 0.0000(11) 
P2 0.0251(13) 0.0288(14) 0.0347(15) -0.0024(12) 0.0121(11) -0.0047(11) 
O1 0.032(4) 0.031(4) 0.033(4) -0.007(3) 0.015(3) -0.008(3) 
C2 0.043(6) 0.027(6) 0.038(6) -0.001(5) 0.014(5) -0.009(5) 
B3 0.020(6) 0.057(8) 0.022(6) 0.005(5) 0.011(5) -0.001(5) 
B4 0.031(6) 0.023(6) 0.038(7) -0.005(5) 0.014(5) 0.000(5) 
B5 0.019(6) 0.028(7) 0.053(8) -0.001(5) 0.010(5) 0.003(5) 
B6 0.023(5) 0.020(5) 0.022(5) -0.007(5) 0.016(4) 0.001(5) 
B7 0.026(6) 0.022(6) 0.043(7) -0.007(5) 0.009(5) -0.003(5) 
B8 0.024(6) 0.035(8) 0.056(8) -0.006(6) 0.010(6) 0.000(5) 
B9 0.021(6) 0.067(10) 0.045(8) -0.013(7) 0.015(6) -0.008(6) 
B10 0.025(6) 0.029(7) 0.056(8) -0.001(6) 0.019(6) 0.002(5) 
C11 0.030(6) 0.028(6) 0.049(7) -0.001(5) 0.007(5) 0.002(5) 
C12 0.035(6) 0.025(6) 0.053(7) 0.001(5) 0.006(5) 0.002(5) 
C13 0.043(7) 0.026(6) 0.061(8) 0.006(6) 0.003(6) -0.003(5) 
C14 0.054(8) 0.042(7) 0.049(7) 0.008(6) 0.000(6) 0.012(6) 
C15 0.037(7) 0.041(7) 0.053(8) 0.010(6) -0.009(6) 0.007(6) 
C16 0.040(7) 0.031(6) 0.060(8) -0.008(6) 0.008(6) -0.004(5) 
C17 0.041(6) 0.042(7) 0.042(7) -0.001(5) 0.016(5) -0.004(5) 
C18 0.025(6) 0.034(6) 0.056(7) 0.004(5) 0.018(5) 0.006(5) 
C19 0.044(7) 0.030(6) 0.045(7) 0.006(5) 0.021(5) 0.001(5) 
C20 0.078(9) 0.028(7) 0.048(7) -0.007(5) 0.028(7) 0.004(6) 
C21 0.073(9) 0.041(7) 0.068(9) 0.013(7) 0.046(8) 0.022(7) 
C22 0.048(7) 0.044(8) 0.053(8) -0.008(6) 0.008(6) 0.015(6) 
C23 0.026(6) 0.043(7) 0.060(7) -0.003(6) 0.010(5) 0.012(5) 
C24 0.028(5) 0.027(6) 0.036(6) -0.007(5) 0.008(5) 0.006(4) 
C25 0.036(6) 0.030(6) 0.037(6) 0.006(5) 0.013(5) 0.006(5) 
C26 0.049(7) 0.042(7) 0.045(7) 0.010(6) 0.023(6) 0.010(6) 
C27 0.068(9) 0.051(8) 0.020(6) 0.005(5) 0.013(6) 0.015(7) 
C28 0.056(8) 0.053(8) 0.040(7) -0.008(6) 0.008(6) 0.011(6) 
C29 0.045(7) 0.037(7) 0.036(6) -0.002(5) 0.008(5) -0.001(5) 
C30 0.029(5) 0.035(6) 0.032(6) 0.003(5) 0.006(4) -0.005(5) 
C31 0.024(5) 0.045(6) 0.032(5) -0.002(5) 0.003(4) -0.005(5) 
C32 0.022(5) 0.065(9) 0.034(6) 0.006(6) 0.003(5) -0.004(6) 
C33 0.034(6) 0.064(9) 0.023(6) 0.007(5) 0.004(5) -0.015(6) 
C34 0.036(6) 0.048(7) 0.046(7) 0.001(6) 0.006(5) -0.016(6) 
C35 0.034(6) 0.046(7) 0.037(6) 0.001(5) 0.016(5) -0.005(5) 
C36 0.025(5) 0.029(6) 0.035(5) -0.003(5) 0.007(4) -0.008(5) 
C37 0.042(6) 0.034(6) 0.035(6) -0.001(5) 0.017(5) -0.006(5) 
C38 0.050(7) 0.068(9) 0.026(6) -0.007(6) 0.015(5) -0.016(6) 
C39 0.046(7) 0.047(7) 0.037(7) -0.018(6) 0.014(5) -0.005(6) 
C40 0.042(7) 0.042(7) 0.046(7) -0.023(6) 0.009(5) -0.013(5) 
C41 0.030(5) 0.033(6) 0.031(6) -0.002(5) 0.011(4) -0.004(5) 
C42 0.036(6) 0.025(6) 0.042(6) -0.003(4) 0.023(5) -0.011(5) 
C43 0.035(6) 0.034(6) 0.053(7) -0.001(5) 0.019(5) -0.005(5) 
C44 0.040(7) 0.034(7) 0.087(10) -0.002(6) 0.028(7) -0.001(5) 
C45 0.036(6) 0.052(8) 0.077(9) -0.019(7) 0.032(6) -0.020(6) 
C46 0.055(8) 0.059(8) 0.048(8) 0.004(6) 0.028(6) -0.005(7) 
C47 0.040(6) 0.048(7) 0.050(7) 0.001(6) 0.024(6) -0.005(6) 
C48 0.031(6) 0.046(7) 0.024(5) -0.014(5) 0.003(4) -0.004(5) 
C49 0.026(5) 0.038(7) 0.041(6) 0.004(5) 0.001(5) -0.004(5) 
C50 0.039(7) 0.048(8) 0.068(9) 0.002(7) 0.002(6) 0.001(6) 
C51 0.049(8) 0.038(7) 0.059(9) 0.008(6) -0.007(6) -0.010(6) 
C52 0.054(8) 0.062(9) 0.026(6) 0.006(6) -0.014(5) -0.022(7) 
C53 0.052(7) 0.023(6) 0.042(7) 0.003(5) 0.009(5) -0.011(5) 
Cl1S 0.089(5) 0.078(5) 0.146(7) 0.040(4) 0.032(4) 0.001(4) 
Cl2S 0.081(5) 0.243(11) 0.129(7) 0.100(7) -0.024(5) -0.047(6) 
C1S 0.081(19) 0.17(3) 0.11(2) 0.00(2) -0.063(17) -0.06(2) 
Cl3S 0.120(6) 0.077(5) 0.129(6) 0.013(4) -0.010(5) 0.027(4) 
Cl4S 0.139(7) 0.091(5) 0.109(6) -0.003(4) -0.033(5) 0.014(5) 
C2S 0.067(16) 0.11(2) 0.12(2) -0.062(18) -0.038(15) 0.045(15) 
Cl5S 0.064(6) 0.108(9) 0.094(6) 0.016(7) 0.029(4) 0.040(6) 
Cl6S 0.097(7) 0.095(8) 0.158(10) 0.045(7) 0.031(7) -0.023(6) 
Cl5' 0.064(6) 0.108(9) 0.094(6) 0.016(7) 0.029(4) 0.040(6) 
Cl6' 0.097(7) 0.095(8) 0.158(10) 0.045(7) 0.031(7) -0.023(6) 
C3S 0.26(5) 0.048(17) 0.18(3) 0.026(19) 0.11(3) 0.07(2) 
  
_geom_special_details 
; 
 All esds (except the esd in the dihedral angle between two l.s. planes) 
 are estimated using the full covariance matrix.  The cell esds are taken 
 into account individually in the estimation of esds in distances, angles 
 and torsion angles; correlations between esds in cell parameters are only 
 used when they are defined by crystal symmetry.  An approximate (isotropic) 
 treatment of cell esds is used for estimating esds involving l.s. planes. 
; 
  
loop_ 
 _geom_bond_atom_site_label_1 
 _geom_bond_atom_site_label_2 
 _geom_bond_distance 
 _geom_bond_site_symmetry_2 
 _geom_bond_publ_flag 
Ru1 B3 2.072(11) . ? 
Ru1 B4 2.095(11) . ? 
Ru1 C2 2.181(11) . ? 
Ru1 P1 2.351(3) . ? 
Ru1 B6 2.364(9) . ? 
Ru1 Cl1 2.411(3) . ? 
Ru1 B5 2.449(11) . ? 
Ru1 B7 2.516(12) . ? 
Ru1 H1 1.3414 . ? 
P1 C30 1.829(10) . ? 
P1 C18 1.835(11) . ? 
P1 C24 1.840(10) . ? 
P2 C48 1.775(11) . ? 
P2 C36 1.794(10) . ? 
P2 C42 1.818(10) . ? 
P2 B3 1.889(13) . ? 
O1 B4 1.363(13) . ? 
O1 C17 1.429(12) . ? 
C2 C11 1.478(15) . ? 
C2 B7 1.582(15) . ? 
C2 B5 1.620(15) . ? 
C2 B8 1.728(16) . ? 
B3 B6 1.770(15) . ? 
B3 B5 1.786(17) . ? 
B3 B9 1.787(17) . ? 
B4 B6 1.746(15) . ? 
B4 B10 1.797(15) . ? 
B4 B7 1.844(17) . ? 
B5 B9 1.802(18) . ? 
B5 B8 1.829(17) . ? 
B5 H5 1.3553 . ? 
B6 B10 1.759(16) . ? 
B6 B9 1.819(16) . ? 
B6 H6 1.0711 . ? 
B7 B8 1.799(16) . ? 
B7 B10 1.807(16) . ? 
B7 H7 1.1003 . ? 
B8 B10 1.751(19) . ? 
B8 B9 1.76(2) . ? 
B8 H8 1.2027 . ? 
B9 B10 1.806(18) . ? 
B9 H9 1.3057 . ? 
B10 H10 1.0864 . ? 
C11 C16 1.392(15) . ? 
C11 C12 1.407(14) . ? 
C12 C13 1.375(15) . ? 
C12 H12A 0.9500 . ? 
C13 C14 1.395(16) . ? 
C13 H13A 0.9500 . ? 
C14 C15 1.358(16) . ? 
C14 H14A 0.9500 . ? 
C15 C16 1.364(16) . ? 
C15 H15A 0.9500 . ? 
C16 H16A 0.9500 . ? 
C17 H17A 0.9800 . ? 
C17 H17B 0.9800 . ? 
C17 H17C 0.9800 . ? 
C18 C23 1.399(14) . ? 
C18 C19 1.411(15) . ? 
C19 C20 1.393(15) . ? 
C19 H19A 0.9500 . ? 
C20 C21 1.373(17) . ? 
C20 H20A 0.9500 . ? 
C21 C22 1.390(18) . ? 
C21 H21A 0.9500 . ? 
C22 C23 1.357(15) . ? 
C22 H22A 0.9500 . ? 
C23 H23A 0.9500 . ? 
C24 C25 1.371(14) . ? 
C24 C29 1.402(14) . ? 
C25 C26 1.384(15) . ? 
C25 H25A 0.9500 . ? 
C26 C27 1.341(16) . ? 
C26 H26A 0.9500 . ? 
C27 C28 1.391(17) . ? 
C27 H27A 0.9500 . ? 
C28 C29 1.401(15) . ? 
C28 H28A 0.9500 . ? 
C29 H29A 0.9500 . ? 
C30 C31 1.380(13) . ? 
C30 C35 1.410(14) . ? 
C31 C32 1.361(14) . ? 
C31 H31A 0.9500 . ? 
C32 C33 1.375(16) . ? 
C32 H32A 0.9500 . ? 
C33 C34 1.385(15) . ? 
C33 H33A 0.9500 . ? 
C34 C35 1.380(14) . ? 
C34 H34A 0.9500 . ? 
C35 H35A 0.9500 . ? 
C36 C37 1.392(13) . ? 
C36 C41 1.406(13) . ? 
C37 C38 1.383(14) . ? 
C37 H37A 0.9500 . ? 
C38 C39 1.354(15) . ? 
C38 H38A 0.9500 . ? 
C39 C40 1.381(15) . ? 
C39 H39A 0.9500 . ? 
C40 C41 1.379(14) . ? 
C40 H40A 0.9500 . ? 
C41 H41A 0.9500 . ? 
C42 C43 1.374(15) . ? 
C42 C47 1.393(14) . ? 
C43 C44 1.404(15) . ? 
C43 H43A 0.9500 . ? 
C44 C45 1.335(17) . ? 
C44 H44A 0.9500 . ? 
C45 C46 1.394(17) . ? 
C45 H45A 0.9500 . ? 
C46 C47 1.376(15) . ? 
C46 H46A 0.9500 . ? 
C47 H47A 0.9500 . ? 
C48 C49 1.401(14) . ? 
C48 C53 1.411(14) . ? 
C49 C50 1.408(15) . ? 
C49 H49A 0.9500 . ? 
C50 C51 1.353(17) . ? 
C50 H50A 0.9500 . ? 
C51 C52 1.377(17) . ? 
C51 H51A 0.9500 . ? 
C52 C53 1.424(16) . ? 
C52 H52A 0.9500 . ? 
C53 H53A 0.9500 . ? 
Cl1S C1S 1.61(3) . ? 
Cl2S C1S 1.84(3) . ? 
C1S H1SA 0.9900 . ? 
C1S H1SB 0.9900 . ? 
Cl3S C2S 1.62(2) . ? 
Cl4S C2S 1.67(2) . ? 
C2S H2SA 0.9900 . ? 
C2S H2SB 0.9900 . ? 
Cl5S C3S 1.84(3) . ? 
Cl6S C3S 1.48(4) . ? 
Cl5' C3S 1.74(4) . ? 
Cl6' C3S 1.34(4) . ? 
C3S H3SA 0.9900 . ? 
C3S H3SB 0.9899 . ? 
C3S H3SC 0.9600 . ? 
C3S H3SD 0.9600 . ? 
  
loop_ 
 _geom_angle_atom_site_label_1 
 _geom_angle_atom_site_label_2 
 _geom_angle_atom_site_label_3 
 _geom_angle 
 _geom_angle_site_symmetry_1 
 _geom_angle_site_symmetry_3 
 _geom_angle_publ_flag 
B3 Ru1 B4 90.8(5) . . ? 
B3 Ru1 C2 84.3(4) . . ? 
B4 Ru1 C2 83.3(4) . . ? 
B3 Ru1 P1 124.2(3) . . ? 
B4 Ru1 P1 86.5(3) . . ? 
C2 Ru1 P1 149.9(3) . . ? 
B3 Ru1 B6 46.5(4) . . ? 
B4 Ru1 B6 45.6(4) . . ? 
C2 Ru1 B6 89.6(4) . . ? 
P1 Ru1 B6 103.1(3) . . ? 
B3 Ru1 Cl1 128.8(3) . . ? 
B4 Ru1 Cl1 137.1(3) . . ? 
C2 Ru1 Cl1 85.0(3) . . ? 
P1 Ru1 Cl1 83.49(9) . . ? 
B6 Ru1 Cl1 173.3(3) . . ? 
B3 Ru1 B5 45.6(4) . . ? 
B4 Ru1 B5 95.3(4) . . ? 
C2 Ru1 B5 40.4(4) . . ? 
P1 Ru1 B5 169.6(3) . . ? 
B6 Ru1 B5 71.5(4) . . ? 
Cl1 Ru1 B5 101.9(3) . . ? 
B3 Ru1 B7 94.5(4) . . ? 
B4 Ru1 B7 46.0(4) . . ? 
C2 Ru1 B7 38.5(4) . . ? 
P1 Ru1 B7 120.6(3) . . ? 
B6 Ru1 B7 70.6(4) . . ? 
Cl1 Ru1 B7 107.0(3) . . ? 
B5 Ru1 B7 66.7(4) . . ? 
B3 Ru1 H1 55.8 . . ? 
B4 Ru1 H1 121.8 . . ? 
C2 Ru1 H1 129.9 . . ? 
P1 Ru1 H1 79.2 . . ? 
B6 Ru1 H1 83.4 . . ? 
Cl1 Ru1 H1 97.0 . . ? 
B5 Ru1 H1 91.2 . . ? 
B7 Ru1 H1 149.9 . . ? 
C30 P1 C18 104.1(5) . . ? 
C30 P1 C24 104.4(5) . . ? 
C18 P1 C24 99.9(5) . . ? 
C30 P1 Ru1 112.4(3) . . ? 
C18 P1 Ru1 116.7(4) . . ? 
C24 P1 Ru1 117.5(3) . . ? 
C48 P2 C36 107.8(5) . . ? 
C48 P2 C42 110.4(5) . . ? 
C36 P2 C42 104.9(5) . . ? 
C48 P2 B3 110.5(5) . . ? 
C36 P2 B3 111.5(5) . . ? 
C42 P2 B3 111.5(5) . . ? 
B4 O1 C17 122.0(8) . . ? 
C11 C2 B7 117.9(9) . . ? 
C11 C2 B5 120.0(9) . . ? 
B7 C2 B5 117.0(9) . . ? 
C11 C2 B8 119.1(9) . . ? 
B7 C2 B8 65.7(7) . . ? 
B5 C2 B8 66.1(7) . . ? 
C11 C2 Ru1 130.6(7) . . ? 
B7 C2 Ru1 82.3(6) . . ? 
B5 C2 Ru1 78.7(6) . . ? 
B8 C2 Ru1 110.2(7) . . ? 
B6 B3 B5 104.5(9) . . ? 
B6 B3 B9 61.5(6) . . ? 
B5 B3 B9 60.6(7) . . ? 
B6 B3 P2 128.4(7) . . ? 
B5 B3 P2 122.8(8) . . ? 
B9 B3 P2 124.0(7) . . ? 
B6 B3 Ru1 75.5(5) . . ? 
B5 B3 Ru1 78.4(6) . . ? 
B9 B3 Ru1 106.2(7) . . ? 
P2 B3 Ru1 129.8(6) . . ? 
O1 B4 B6 127.0(9) . . ? 
O1 B4 B10 122.1(9) . . ? 
B6 B4 B10 59.5(6) . . ? 
O1 B4 B7 122.2(9) . . ? 
B6 B4 B7 103.7(8) . . ? 
B10 B4 B7 59.5(6) . . ? 
O1 B4 Ru1 134.2(8) . . ? 
B6 B4 Ru1 75.4(5) . . ? 
B10 B4 Ru1 103.7(7) . . ? 
B7 B4 Ru1 79.1(6) . . ? 
C2 B5 B3 113.8(8) . . ? 
C2 B5 B9 106.8(9) . . ? 
B3 B5 B9 59.7(7) . . ? 
C2 B5 B8 59.8(6) . . ? 
B3 B5 B8 109.3(9) . . ? 
B9 B5 B8 58.1(7) . . ? 
C2 B5 Ru1 60.9(5) . . ? 
B3 B5 Ru1 56.0(5) . . ? 
B9 B5 Ru1 92.0(6) . . ? 
B8 B5 Ru1 96.5(6) . . ? 
C2 B5 H5 118.3 . . ? 
B3 B5 H5 113.1 . . ? 
B9 B5 H5 130.9 . . ? 
B8 B5 H5 131.9 . . ? 
Ru1 B5 H5 125.8 . . ? 
B4 B6 B10 61.7(6) . . ? 
B4 B6 B3 115.1(7) . . ? 
B10 B6 B3 110.2(8) . . ? 
B4 B6 B9 112.2(8) . . ? 
B10 B6 B9 60.6(7) . . ? 
B3 B6 B9 59.7(6) . . ? 
B4 B6 Ru1 59.0(5) . . ? 
B10 B6 Ru1 95.0(6) . . ? 
B3 B6 Ru1 58.0(4) . . ? 
B9 B6 Ru1 94.3(6) . . ? 
B4 B6 H6 123.5 . . ? 
B10 B6 H6 127.7 . . ? 
B3 B6 H6 110.7 . . ? 
B9 B6 H6 118.7 . . ? 
Ru1 B6 H6 134.4 . . ? 
C2 B7 B8 61.1(7) . . ? 
C2 B7 B10 106.2(8) . . ? 
B8 B7 B10 58.1(7) . . ? 
C2 B7 B4 111.8(8) . . ? 
B8 B7 B4 109.0(8) . . ? 
B10 B7 B4 59.0(6) . . ? 
C2 B7 Ru1 59.2(5) . . ? 
B8 B7 Ru1 94.9(6) . . ? 
B10 B7 Ru1 88.8(6) . . ? 
B4 B7 Ru1 54.9(5) . . ? 
C2 B7 H7 125.3 . . ? 
B8 B7 H7 119.1 . . ? 
B10 B7 H7 118.6 . . ? 
B4 B7 H7 117.4 . . ? 
Ru1 B7 H7 143.8 . . ? 
C2 B8 B10 102.5(8) . . ? 
C2 B8 B9 103.8(8) . . ? 
B10 B8 B9 61.8(7) . . ? 
C2 B8 B7 53.2(6) . . ? 
B10 B8 B7 61.2(7) . . ? 
B9 B8 B7 107.9(9) . . ? 
C2 B8 B5 54.1(6) . . ? 
B10 B8 B5 105.0(9) . . ? 
B9 B8 B5 60.2(7) . . ? 
B7 B8 B5 97.6(8) . . ? 
C2 B8 H8 120.5 . . ? 
B10 B8 H8 132.9 . . ? 
B9 B8 H8 118.9 . . ? 
B7 B8 H8 131.6 . . ? 
B5 B8 H8 115.1 . . ? 
B8 B9 B3 112.3(8) . . ? 
B8 B9 B5 61.7(7) . . ? 
B3 B9 B5 59.7(6) . . ? 
B8 B9 B10 58.7(7) . . ? 
B3 B9 B10 107.3(8) . . ? 
B5 B9 B10 103.8(8) . . ? 
B8 B9 B6 105.9(8) . . ? 
B3 B9 B6 58.8(6) . . ? 
B5 B9 B6 101.9(7) . . ? 
B10 B9 B6 58.0(6) . . ? 
B8 B9 H9 126.0 . . ? 
B3 B9 H9 112.7 . . ? 
B5 B9 H9 122.7 . . ? 
B10 B9 H9 129.3 . . ? 
B6 B9 H9 122.3 . . ? 
B8 B10 B6 109.3(9) . . ? 
B8 B10 B4 113.4(9) . . ? 
B6 B10 B4 58.8(6) . . ? 
B8 B10 B9 59.5(8) . . ? 
B6 B10 B9 61.4(7) . . ? 
B4 B10 B9 110.5(8) . . ? 
B8 B10 B7 60.7(7) . . ? 
B6 B10 B7 104.8(8) . . ? 
B4 B10 B7 61.5(6) . . ? 
B9 B10 B7 105.8(9) . . ? 
B8 B10 H10 120.4 . . ? 
B6 B10 H10 126.7 . . ? 
B4 B10 H10 111.8 . . ? 
B9 B10 H10 131.2 . . ? 
B7 B10 H10 115.0 . . ? 
C16 C11 C12 117.0(11) . . ? 
C16 C11 C2 122.6(10) . . ? 
C12 C11 C2 120.3(10) . . ? 
C13 C12 C11 120.8(11) . . ? 
C13 C12 H12A 119.6 . . ? 
C11 C12 H12A 119.6 . . ? 
C12 C13 C14 120.8(11) . . ? 
C12 C13 H13A 119.6 . . ? 
C14 C13 H13A 119.6 . . ? 
C15 C14 C13 117.8(11) . . ? 
C15 C14 H14A 121.1 . . ? 
C13 C14 H14A 121.1 . . ? 
C14 C15 C16 122.5(11) . . ? 
C14 C15 H15A 118.8 . . ? 
C16 C15 H15A 118.8 . . ? 
C15 C16 C11 120.9(11) . . ? 
C15 C16 H16A 119.5 . . ? 
C11 C16 H16A 119.5 . . ? 
O1 C17 H17A 109.5 . . ? 
O1 C17 H17B 109.5 . . ? 
H17A C17 H17B 109.5 . . ? 
O1 C17 H17C 109.5 . . ? 
H17A C17 H17C 109.5 . . ? 
H17B C17 H17C 109.5 . . ? 
C23 C18 C19 116.9(10) . . ? 
C23 C18 P1 121.6(9) . . ? 
C19 C18 P1 121.5(8) . . ? 
C20 C19 C18 120.2(11) . . ? 
C20 C19 H19A 119.9 . . ? 
C18 C19 H19A 119.9 . . ? 
C21 C20 C19 121.1(12) . . ? 
C21 C20 H20A 119.5 . . ? 
C19 C20 H20A 119.5 . . ? 
C20 C21 C22 118.8(11) . . ? 
C20 C21 H21A 120.6 . . ? 
C22 C21 H21A 120.6 . . ? 
C23 C22 C21 120.7(12) . . ? 
C23 C22 H22A 119.6 . . ? 
C21 C22 H22A 119.6 . . ? 
C22 C23 C18 122.2(12) . . ? 
C22 C23 H23A 118.9 . . ? 
C18 C23 H23A 118.9 . . ? 
C25 C24 C29 120.7(10) . . ? 
C25 C24 P1 118.4(8) . . ? 
C29 C24 P1 120.7(8) . . ? 
C24 C25 C26 120.5(11) . . ? 
C24 C25 H25A 119.8 . . ? 
C26 C25 H25A 119.8 . . ? 
C27 C26 C25 119.5(11) . . ? 
C27 C26 H26A 120.2 . . ? 
C25 C26 H26A 120.2 . . ? 
C26 C27 C28 121.9(11) . . ? 
C26 C27 H27A 119.0 . . ? 
C28 C27 H27A 119.0 . . ? 
C27 C28 C29 119.4(12) . . ? 
C27 C28 H28A 120.3 . . ? 
C29 C28 H28A 120.3 . . ? 
C28 C29 C24 117.9(10) . . ? 
C28 C29 H29A 121.1 . . ? 
C24 C29 H29A 121.1 . . ? 
C31 C30 C35 118.7(9) . . ? 
C31 C30 P1 122.5(8) . . ? 
C35 C30 P1 118.8(8) . . ? 
C32 C31 C30 120.6(11) . . ? 
C32 C31 H31A 119.7 . . ? 
C30 C31 H31A 119.7 . . ? 
C31 C32 C33 121.3(11) . . ? 
C31 C32 H32A 119.4 . . ? 
C33 C32 H32A 119.4 . . ? 
C32 C33 C34 119.4(10) . . ? 
C32 C33 H33A 120.3 . . ? 
C34 C33 H33A 120.3 . . ? 
C35 C34 C33 120.0(11) . . ? 
C35 C34 H34A 120.0 . . ? 
C33 C34 H34A 120.0 . . ? 
C34 C35 C30 120.0(10) . . ? 
C34 C35 H35A 120.0 . . ? 
C30 C35 H35A 120.0 . . ? 
C37 C36 C41 118.2(9) . . ? 
C37 C36 P2 123.3(8) . . ? 
C41 C36 P2 118.4(7) . . ? 
C38 C37 C36 120.6(10) . . ? 
C38 C37 H37A 119.7 . . ? 
C36 C37 H37A 119.7 . . ? 
C39 C38 C37 119.8(10) . . ? 
C39 C38 H38A 120.1 . . ? 
C37 C38 H38A 120.1 . . ? 
C38 C39 C40 121.7(10) . . ? 
C38 C39 H39A 119.1 . . ? 
C40 C39 H39A 119.1 . . ? 
C41 C40 C39 119.0(10) . . ? 
C41 C40 H40A 120.5 . . ? 
C39 C40 H40A 120.5 . . ? 
C40 C41 C36 120.7(9) . . ? 
C40 C41 H41A 119.7 . . ? 
C36 C41 H41A 119.7 . . ? 
C43 C42 C47 120.7(9) . . ? 
C43 C42 P2 116.5(7) . . ? 
C47 C42 P2 122.8(9) . . ? 
C42 C43 C44 119.0(11) . . ? 
C42 C43 H43A 120.5 . . ? 
C44 C43 H43A 120.5 . . ? 
C45 C44 C43 119.7(12) . . ? 
C45 C44 H44A 120.2 . . ? 
C43 C44 H44A 120.2 . . ? 
C44 C45 C46 122.4(11) . . ? 
C44 C45 H45A 118.8 . . ? 
C46 C45 H45A 118.8 . . ? 
C47 C46 C45 118.4(11) . . ? 
C47 C46 H46A 120.8 . . ? 
C45 C46 H46A 120.8 . . ? 
C46 C47 C42 119.8(11) . . ? 
C46 C47 H47A 120.1 . . ? 
C42 C47 H47A 120.1 . . ? 
C49 C48 C53 117.8(10) . . ? 
C49 C48 P2 120.9(8) . . ? 
C53 C48 P2 121.1(8) . . ? 
C48 C49 C50 121.0(11) . . ? 
C48 C49 H49A 119.5 . . ? 
C50 C49 H49A 119.5 . . ? 
C51 C50 C49 120.4(12) . . ? 
C51 C50 H50A 119.8 . . ? 
C49 C50 H50A 119.8 . . ? 
C50 C51 C52 120.8(12) . . ? 
C50 C51 H51A 119.6 . . ? 
C52 C51 H51A 119.6 . . ? 
C51 C52 C53 120.2(11) . . ? 
C51 C52 H52A 119.9 . . ? 
C53 C52 H52A 119.9 . . ? 
C48 C53 C52 119.7(11) . . ? 
C48 C53 H53A 120.1 . . ? 
C52 C53 H53A 120.1 . . ? 
Cl1S C1S Cl2S 110(2) . . ? 
Cl1S C1S H1SA 109.7 . . ? 
Cl2S C1S H1SA 109.7 . . ? 
Cl1S C1S H1SB 109.7 . . ? 
Cl2S C1S H1SB 109.7 . . ? 
H1SA C1S H1SB 108.2 . . ? 
Cl3S C2S Cl4S 120.1(16) . . ? 
Cl3S C2S H2SA 107.3 . . ? 
Cl4S C2S H2SA 107.3 . . ? 
Cl3S C2S H2SB 107.3 . . ? 
Cl4S C2S H2SB 107.3 . . ? 
H2SA C2S H2SB 106.9 . . ? 
Cl6' C3S Cl5' 128(3) . . ? 
Cl6S C3S Cl5S 115(2) . . ? 
Cl6S C3S H3SA 110.3 . . ? 
Cl5S C3S H3SA 109.0 . . ? 
Cl6S C3S H3SB 108.1 . . ? 
Cl5S C3S H3SB 106.5 . . ? 
H3SA C3S H3SB 107.4 . . ? 
Cl6' C3S H3SC 106.2 . . ? 
Cl5' C3S H3SC 107.4 . . ? 
Cl6' C3S H3SD 105.1 . . ? 
Cl5' C3S H3SD 102.6 . . ? 
H3SC C3S H3SD 106.3 . . ? 
  
_refine_diff_density_max    2.931 
_refine_diff_density_min   -1.039 
_refine_diff_density_rms    0.158 
  
_shelx_res_file 
; 
  
    rucb8pm.res created by SHELXL-2014/7 
  
  
TITL rucb8pm in P2(1)/c 
CELL 0.71073  18.4671  15.5149  18.6115  90.000 100.170  90.000 
ZERR    4.00   0.0110   0.0090   0.0111   0.000   0.011   0.000 
LATT  1 
SYMM -X, 0.5+Y, 0.5-Z 
SFAC C H B O P CL RU 
UNIT 184 196 32 4 8 20 4 
  
TEMP -163.0 
size 0.48 0.32 0.26 
  
ACTA 
  
omit -4 52 
  
omit     1   1   0 
omit     0   2   0 
omit     1   0   0 
omit     2   0   0 
  
omit     5   2  10 
omit    -5  11   6 
omit    -1   0   2 
omit     4   2   4 
omit     4   1   0 
omit     5   1   1 
omit    -3   2   8 
omit     0   0   4 
omit     5   3  10 
omit     0   1   3 
omit    -1   1   5 
omit    -3   1   9 
omit     1   1   3 
omit    -1   2   8 
  
L.S. 12 
BOND  $H 
FMAP 2 
PLAN 20 
  
WGHT    0.100000   50.000000 
FVAR       0.07463 
RU1   7    0.261260    0.358396    0.609275    11.00000    0.02042    0.02785 = 
         0.03369   -0.00086    0.01089   -0.00220 
AFIX   3 
H1    2    0.252620    0.272626    0.611155    11.00000   -1.20000 
AFIX   0 
CL1   6    0.300087    0.365112    0.492323    11.00000    0.02856    0.03721 = 
         0.03175    0.00040    0.01497   -0.00401 
P1    5    0.383275    0.314013    0.650487    11.00000    0.02259    0.02732 = 
         0.03521   -0.00094    0.01128   -0.00002 
P2    5    0.141306    0.180858    0.627413    11.00000    0.02508    0.02882 = 
         0.03470   -0.00238    0.01211   -0.00467 
O1    4    0.331655    0.460953    0.753865    11.00000    0.03181    0.03086 = 
         0.03302   -0.00685    0.01506   -0.00770 
C2    1    0.182907    0.458436    0.565193    11.00000    0.04277    0.02661 = 
         0.03780   -0.00116    0.01442   -0.00853 
B3    3    0.169881    0.297835    0.636586    11.00000    0.01950    0.05667 = 
         0.02203    0.00518    0.01130   -0.00065 
B4    3    0.272995    0.433780    0.704031    11.00000    0.03113    0.02288 = 
         0.03751   -0.00499    0.01419    0.00000 
B5    3    0.128190    0.379488    0.575258    11.00000    0.01932    0.02838 = 
         0.05303   -0.00061    0.00953    0.00327 
AFIX   3 
H5    2    0.084770    0.347128    0.514958    11.00000   -1.20000 
AFIX   0 
B6    3    0.209146    0.354629    0.716502    11.00000    0.02295    0.02035 = 
         0.02220   -0.00661    0.01623    0.00060 
AFIX   3 
H6    2    0.215346    0.313259    0.763262    11.00000   -1.20000 
AFIX   0 
B7    3    0.220075    0.507544    0.636745    11.00000    0.02644    0.02207 = 
         0.04312   -0.00709    0.00891   -0.00338 
AFIX   3 
H7    2    0.236195    0.575904    0.639525    11.00000   -1.20000 
AFIX   0 
B8    3    0.124056    0.480152    0.625523    11.00000    0.02444    0.03526 = 
         0.05600   -0.00624    0.00960   -0.00011 
AFIX   3 
H8    2    0.069386    0.522350    0.606592    11.00000   -1.20000 
AFIX   0 
B9    3    0.116781    0.380524    0.669459    11.00000    0.02089    0.06671 = 
         0.04504   -0.01313    0.01538   -0.00785 
AFIX   3 
H9    2    0.058001    0.350614    0.690859    11.00000   -1.20000 
AFIX   0 
B10   3    0.180112    0.462748    0.710440    11.00000    0.02544    0.02913 = 
         0.05556   -0.00098    0.01919    0.00206 
AFIX   3 
H10   2    0.178042    0.506478    0.755620    11.00000   -1.20000 
AFIX   0 
C11   1    0.173603    0.505762    0.495223    11.00000    0.03027    0.02772 = 
         0.04933   -0.00134    0.00722    0.00189 
C12   1    0.231972    0.554509    0.476982    11.00000    0.03466    0.02535 = 
         0.05280    0.00071    0.00622    0.00227 
AFIX  43 
H12A  2    0.277196    0.557787    0.510344    11.00000   -1.20000 
AFIX   0 
C13   1    0.224392    0.597481    0.411461    11.00000    0.04291    0.02627 = 
         0.06077    0.00586    0.00284   -0.00338 
AFIX  43 
H13A  2    0.264658    0.629456    0.399848    11.00000   -1.20000 
AFIX   0 
C14   1    0.158307    0.594711    0.361823    11.00000    0.05392    0.04181 = 
         0.04886    0.00844    0.00027    0.01206 
AFIX  43 
H14A  2    0.152957    0.623987    0.316360    11.00000   -1.20000 
AFIX   0 
C15   1    0.101861    0.548788    0.380619    11.00000    0.03660    0.04139 = 
         0.05322    0.00973   -0.00854    0.00692 
AFIX  43 
H15A  2    0.055874    0.548389    0.348312    11.00000   -1.20000 
AFIX   0 
C16   1    0.108744    0.503214    0.444164    11.00000    0.04014    0.03101 = 
         0.05998   -0.00811    0.00760   -0.00440 
AFIX  43 
H16A  2    0.068690    0.469254    0.453695    11.00000   -1.20000 
AFIX   0 
C17   1    0.331546    0.458129    0.830567    11.00000    0.04069    0.04247 = 
         0.04241   -0.00079    0.01597   -0.00385 
AFIX 137 
H17A  2    0.382347    0.456626    0.857058    11.00000   -1.50000 
H17B  2    0.305477    0.406367    0.842200    11.00000   -1.50000 
H17C  2    0.306741    0.509456    0.845061    11.00000   -1.50000 
AFIX   0 
C18   1    0.409239    0.207883    0.619690    11.00000    0.02544    0.03396 = 
         0.05551    0.00445    0.01771    0.00615 
C19   1    0.373017    0.171355    0.553587    11.00000    0.04386    0.03037 = 
         0.04547    0.00578    0.02105    0.00119 
AFIX  43 
H19A  2    0.333483    0.201310    0.524500    11.00000   -1.20000 
AFIX   0 
C20   1    0.395078    0.091472    0.530862    11.00000    0.07845    0.02777 = 
         0.04754   -0.00739    0.02761    0.00439 
AFIX  43 
H20A  2    0.371891    0.068777    0.485150    11.00000   -1.20000 
AFIX   0 
C21   1    0.449793    0.045005    0.573463    11.00000    0.07340    0.04070 = 
         0.06848    0.01328    0.04606    0.02245 
AFIX  43 
H21A  2    0.464054   -0.009779    0.557910    11.00000   -1.20000 
AFIX   0 
C22   1    0.483925    0.079573    0.639738    11.00000    0.04849    0.04403 = 
         0.05331   -0.00800    0.00805    0.01478 
AFIX  43 
H22A  2    0.521048    0.047490    0.670234    11.00000   -1.20000 
AFIX   0 
C23   1    0.464815    0.158650    0.661377    11.00000    0.02603    0.04317 = 
         0.05969   -0.00307    0.01006    0.01234 
AFIX  43 
H23A  2    0.490012    0.181323    0.706321    11.00000   -1.20000 
AFIX   0 
C24   1    0.413700    0.302071    0.749564    11.00000    0.02832    0.02734 = 
         0.03616   -0.00706    0.00785    0.00617 
C25   1    0.374888    0.247874    0.786933    11.00000    0.03567    0.02950 = 
         0.03745    0.00605    0.01283    0.00569 
AFIX  43 
H25A  2    0.331881    0.220097    0.761933    11.00000   -1.20000 
AFIX   0 
C26   1    0.397913    0.233356    0.860785    11.00000    0.04929    0.04213 = 
         0.04533    0.01009    0.02272    0.01011 
AFIX  43 
H26A  2    0.370570    0.196286    0.886611    11.00000   -1.20000 
AFIX   0 
C27   1    0.459101    0.271987    0.895640    11.00000    0.06775    0.05140 = 
         0.02000    0.00538    0.01340    0.01487 
AFIX  43 
H27A  2    0.474228    0.262260    0.946472    11.00000   -1.20000 
AFIX   0 
C28   1    0.501082    0.325888    0.859558    11.00000    0.05591    0.05323 = 
         0.03989   -0.00809    0.00847    0.01114 
AFIX  43 
H28A  2    0.545088    0.350984    0.885175    11.00000   -1.20000 
AFIX   0 
C29   1    0.477902    0.342834    0.785132    11.00000    0.04540    0.03727 = 
         0.03638   -0.00248    0.00796   -0.00140 
AFIX  43 
H29A  2    0.504809    0.380727    0.759564    11.00000   -1.20000 
AFIX   0 
C30   1    0.450255    0.387718    0.622187    11.00000    0.02866    0.03457 = 
         0.03155    0.00319    0.00603   -0.00526 
C31   1    0.508632    0.359284    0.591408    11.00000    0.02369    0.04534 = 
         0.03225   -0.00187    0.00305   -0.00501 
AFIX  43 
H31A  2    0.514852    0.299323    0.584121    11.00000   -1.20000 
AFIX   0 
C32   1    0.557384    0.416339    0.571392    11.00000    0.02216    0.06502 = 
         0.03406    0.00620    0.00278   -0.00404 
AFIX  43 
H32A  2    0.597013    0.395538    0.549929    11.00000   -1.20000 
AFIX   0 
C33   1    0.550419    0.503528    0.581621    11.00000    0.03379    0.06411 = 
         0.02300    0.00701    0.00386   -0.01465 
AFIX  43 
H33A  2    0.584677    0.542581    0.566978    11.00000   -1.20000 
AFIX   0 
C34   1    0.493043    0.533898    0.613446    11.00000    0.03625    0.04794 = 
         0.04598    0.00095    0.00637   -0.01613 
AFIX  43 
H34A  2    0.488245    0.593944    0.621434    11.00000   -1.20000 
AFIX   0 
C35   1    0.442827    0.476900    0.633560    11.00000    0.03413    0.04579 = 
         0.03692    0.00078    0.01573   -0.00490 
AFIX  43 
H35A  2    0.403249    0.497752    0.655072    11.00000   -1.20000 
AFIX   0 
C36   1    0.129438    0.145367    0.534357    11.00000    0.02537    0.02939 = 
         0.03501   -0.00270    0.00742   -0.00796 
C37   1    0.157104    0.189992    0.480180    11.00000    0.04196    0.03403 = 
         0.03549   -0.00072    0.01712   -0.00619 
AFIX  43 
H37A  2    0.183360    0.242238    0.491921    11.00000   -1.20000 
AFIX   0 
C38   1    0.146712    0.158959    0.409426    11.00000    0.04992    0.06779 = 
         0.02644   -0.00703    0.01531   -0.01604 
AFIX  43 
H38A  2    0.163550    0.191237    0.372239    11.00000   -1.20000 
AFIX   0 
C39   1    0.112452    0.082410    0.393366    11.00000    0.04621    0.04696 = 
         0.03733   -0.01789    0.01383   -0.00549 
AFIX  43 
H39A  2    0.106749    0.060893    0.344904    11.00000   -1.20000 
AFIX   0 
C40   1    0.085587    0.034803    0.445594    11.00000    0.04153    0.04230 = 
         0.04641   -0.02348    0.00871   -0.01305 
AFIX  43 
H40A  2    0.061213   -0.018470    0.433163    11.00000   -1.20000 
AFIX   0 
C41   1    0.094678    0.065768    0.516074    11.00000    0.03027    0.03342 = 
         0.03147   -0.00190    0.01110   -0.00397 
AFIX  43 
H41A  2    0.077273    0.032972    0.552637    11.00000   -1.20000 
AFIX   0 
C42   1    0.052326    0.163869    0.654141    11.00000    0.03628    0.02484 = 
         0.04152   -0.00336    0.02277   -0.01092 
C43   1   -0.005070    0.212845    0.618720    11.00000    0.03521    0.03393 = 
         0.05303   -0.00145    0.01890   -0.00499 
AFIX  43 
H43A  2    0.002510    0.253145    0.582339    11.00000   -1.20000 
AFIX   0 
C44   1   -0.075062    0.202420    0.637112    11.00000    0.04021    0.03380 = 
         0.08710   -0.00179    0.02810   -0.00078 
AFIX  43 
H44A  2   -0.115540    0.235079    0.612659    11.00000   -1.20000 
AFIX   0 
C45   1   -0.084488    0.146413    0.689115    11.00000    0.03648    0.05182 = 
         0.07709   -0.01860    0.03192   -0.01997 
AFIX  43 
H45A  2   -0.131982    0.140721    0.701562    11.00000   -1.20000 
AFIX   0 
C46   1   -0.027202    0.095955    0.725840    11.00000    0.05489    0.05866 = 
         0.04821    0.00360    0.02817   -0.00465 
AFIX  43 
H46A  2   -0.035402    0.056291    0.762457    11.00000   -1.20000 
AFIX   0 
C47   1    0.041505    0.105002    0.707762    11.00000    0.03988    0.04772 = 
         0.05003    0.00146    0.02379   -0.00520 
AFIX  43 
H47A  2    0.081445    0.071197    0.731781    11.00000   -1.20000 
AFIX   0 
C48   1    0.209073    0.114383    0.679819    11.00000    0.03050    0.04599 = 
         0.02384   -0.01376    0.00324   -0.00403 
C49   1    0.250922    0.056872    0.645925    11.00000    0.02572    0.03795 = 
         0.04125    0.00376    0.00146   -0.00448 
AFIX  43 
H49A  2    0.243521    0.054206    0.594148    11.00000   -1.20000 
AFIX   0 
C50   1    0.303770    0.002979    0.687437    11.00000    0.03852    0.04764 = 
         0.06753    0.00207    0.00249    0.00093 
AFIX  43 
H50A  2    0.333466   -0.033340    0.663525    11.00000   -1.20000 
AFIX   0 
C51   1    0.312538    0.002577    0.761156    11.00000    0.04851    0.03831 = 
         0.05934    0.00822   -0.00682   -0.00964 
AFIX  43 
H51A  2    0.347252   -0.035458    0.788467    11.00000   -1.20000 
AFIX   0 
C52   1    0.271737    0.056650    0.797070    11.00000    0.05387    0.06162 = 
         0.02573    0.00592   -0.01442   -0.02239 
AFIX  43 
H52A  2    0.278965    0.056329    0.848889    11.00000   -1.20000 
AFIX   0 
C53   1    0.218734    0.113051    0.756730    11.00000    0.05225    0.02293 = 
         0.04249    0.00282    0.00891   -0.01146 
AFIX  43 
H53A  2    0.190000    0.149628    0.781497    11.00000   -1.20000 
AFIX   0 
CL1S  6    0.764932    0.405377    1.020198    10.66667    0.08900    0.07813 = 
         0.14570    0.03990    0.03212    0.00125 
CL2S  6    0.634890    0.313863    1.030207    10.66667    0.08060    0.24286 = 
         0.12936    0.09971   -0.02411   -0.04662 
C1S   1    0.720145    0.319168    0.992214    10.66667    0.08085    0.17328 = 
         0.11330   -0.00406   -0.06316   -0.06021 
AFIX  23 
H1SA  2    0.750881    0.267927    1.007784    10.66667   -1.20000 
H1SB  2    0.708152    0.319261    0.938226    10.66667   -1.20000 
AFIX   0 
CL3S  6    0.109264   -0.282137    0.566616    10.66667    0.11986    0.07656 = 
         0.12930    0.01278   -0.01005    0.02691 
CL4S  6    0.109031   -0.128163    0.650340    10.66667    0.13888    0.09084 = 
         0.10877   -0.00275   -0.03327    0.01355 
C2S   1    0.064149   -0.209422    0.602644    10.66667    0.06672    0.11092 = 
         0.12192   -0.06168   -0.03815    0.04532 
AFIX  23 
H2SA  2    0.035456   -0.239426    0.635280    10.66667   -1.20000 
H2SB  2    0.028190   -0.183606    0.562684    10.66667   -1.20000 
AFIX   0 
  
eadp cl5s cl5' 
eadp cl6s cl6' 
  
PART   1 
CL5S  6    0.369573    0.803237    0.187242    10.50000    0.06442    0.10820 = 
         0.09402    0.01563    0.02933    0.04037 
CL6S  6    0.265651    0.745176    0.269677    10.50000    0.09680    0.09473 = 
         0.15772    0.04512    0.03121   -0.02257 
PART   2 
CL5'  6    0.350095    0.756258    0.195483    10.16667    0.06442    0.10820 = 
         0.09402    0.01563    0.02933    0.04037 
CL6'  6    0.302260    0.787790    0.325616    10.16667    0.09680    0.09473 = 
         0.15772    0.04512    0.03121   -0.02257 
PART   0 
C3S   1    0.317807    0.816055    0.262160    10.66667    0.25771    0.04821 = 
         0.17842    0.02626    0.11187    0.06624 
AFIX   3 
PART   1 10.5 
H3SA  2    0.352907    0.824065    0.308430    10.50000   -1.20000 
H3SB  2    0.289237    0.870075    0.252400    10.50000   -1.20000 
part 2  10.16667 
H3SC  2    0.275067    0.846905    0.238650    10.16667   -1.20000 
H3SD  2    0.355827    0.858295    0.275310    10.16667   -1.20000 
  
PART   0 
  
AFIX   0 
HKLF 4 
  
REM  rucb8pm in P2(1)/c 
REM R1 =  0.0987 for    5005 Fo > 4sig(Fo)  and  0.1814 for all   10275 data 
REM    602 parameters refined using      0 restraints 
  
END 
  
WGHT      0.1557     11.9721 
  
REM Highest difference peak  2.931,  deepest hole -1.039,  1-sigma level  0.158 
Q1    1   0.2361  0.4248  0.5910  11.00000  0.05    2.93 
Q2    1   0.2860  0.4367  0.6249  11.00000  0.05    2.14 
Q3    1   0.2884  0.2965  0.4914  11.00000  0.05    1.16 
Q4    1   0.2850  0.4208  0.4877  11.00000  0.05    1.00 
Q5    1   0.7643  0.3759  0.9252  11.00000  0.05    0.99 
Q6    1   0.1201  0.2482  0.6215  11.00000  0.05    0.84 
Q7    1   0.3911  0.3944  0.6544  11.00000  0.05    0.78 
Q8    1   0.1729 -0.1794  0.5636  11.00000  0.05    0.77 
Q9    1   0.7169  0.3613  0.9625  11.00000  0.05    0.77 
Q10   1   0.3468  0.3858  0.6387  11.00000  0.05    0.77 
Q11   1   0.2502 -0.0445  0.5699  11.00000  0.05    0.74 
Q12   1   0.0754 -0.2005  0.6593  11.00000  0.05    0.73 
Q13   1   0.3235  0.4485  0.5138  11.00000  0.05    0.72 
Q14   1   0.6448  0.2598  0.9831  11.00000  0.05    0.71 
Q15   1   0.3669  0.2433  0.6527  11.00000  0.05    0.71 
Q16   1   0.0936 -0.3050  0.6222  11.00000  0.05    0.69 
Q17   1   0.7140  0.3642  0.8574  11.00000  0.05    0.66 
Q18   1   0.0420 -0.2621  0.5947  11.00000  0.05    0.66 
Q19   1   0.7600  0.2983  0.9749  11.00000  0.05    0.65 
Q20   1   0.2745  0.3394  0.6494  11.00000  0.05    0.65 
; 
_shelx_res_checksum   74315 
  
_shelx_hkl_file 
; 
   0   0  -2    6.93    0.42   1 
   0   0   2    6.96    0.43   1 
   0   0   3    1.82    0.49   1 
   0   0   4  613.10    7.14   1 
   0   0   5    0.81    0.65   1 
   0   0   6    1.65    0.78   1 
   0   0   7   26.64    1.53   1 
   0   0   8  340.04    5.23   1 
   0   0   9    0.84    1.11   1 
   0   0  10    6.53    1.60   1 
   0   0  11    2.07    1.44   1 
   0   1   0   -0.14    0.22   1 
   0  -1   2  608.33    6.72   1 
   0   1   2  646.26    7.74   1 
   0  -1   3   12.48    0.81   1 
   0   1   3   15.04    0.81   1 
   0  -1   4    1.10    0.59   1 
   0   1   4    1.03    0.56   1 
   0  -1   5  168.27    3.14   1 
   0   1   5  187.70    3.20   1 
   0  -1   6  128.32    2.94   1 
   0   1   6  116.44    2.61   1 
   0  -1   7    3.65    1.10   1 
   0   1   7    2.24    0.94   1 
   0  -1   8    2.07    1.15   1 
   0   1   8    1.33    0.99   1 
   0  -1   9  118.39    3.48   1 
   0  -1  10   32.30    2.14   1 
   0  -1  11    9.37    1.93   1 
   0  -1  12    2.41    1.62   1 
   0  -1  13    3.03    1.82   1 
   0   2   0   38.18    1.44   1 
   0   2  -1   62.73    1.96   1 
   0   2   1   71.45    1.98   1 
   0   2  -2    7.33    0.86   1 
   0   2   2    9.78    0.84   1 
   0   2  -3  295.68    4.96   1 
   0   2   3  341.30    4.90   1 
   0  -2   4   44.82    1.81   1 
   0   2   4   54.95    1.81   1 
   0  -2   5   42.85    1.85   1 
   0   2   5   40.62    1.65   1 
   0  -2   6    3.18    1.02   1 
   0   2   6    2.47    0.94   1 
   0  -2   7  265.14    4.84   1 
   0   2   7  280.86    4.60   1 
   0  -2   8   16.87    1.56   1 
   0   2   8   18.51    1.46   1 
   0  -2   9   21.01    1.76   1 
   0   2   9   18.88    1.56   1 
   0  -2  10    6.31    1.66   1 
   0   2  10    4.60    1.41   1 
   0  -2  11    1.39    1.55   1 
   0   2  11    0.36    1.35   1 
   0  -2  12    3.45    1.86   1 
   0  -2  13    3.93    1.96   1 
   0  -2  14    2.07    2.02   1 
   0   3   0    0.50    0.80   1 
   0   3  -1   60.19    2.35   1 
   0   3   1   64.84    2.27   1 
   0   3  -2  295.27    5.37   1 
   0   3   2  320.20    5.25   1 
   0   3  -3   -0.51    0.96   1 
   0   3   3    0.88    0.86   1 
   0   3  -4   30.18    2.00   1 
   0   3   4   33.80    1.76   1 
   0  -3   5   25.12    1.70   1 
   0   3   5   29.35    1.68   1 
   0  -3   6   14.29    1.38   1 
   0   3   6   16.71    1.49   1 
   0  -3   7    2.68    1.19   1 
   0   3   7    2.14    1.21   1 
   0  -3   8   11.98    1.47   1 
   0   3   8   13.86    1.50   1 
   0  -3   9   10.38    1.82   1 
   0   3   9   13.31    1.90   1 
   0  -3  10    0.00    1.31   1 
   0   3  10    1.25    1.40   1 
   0  -3  11   39.65    2.59   1 
   0   3  11   41.72    2.50   1 
   0  -3  12    8.25    2.15   1 
   0   3  12   11.13    2.26   1 
   0  -3  13    0.50    1.81   1 
   0  -3  14    1.86    2.20   1 
   0   4   0   76.07    2.90   1 
   0   4  -1    4.19    1.46   1 
   0   4   1    4.31    1.30   1 
   0   4  -2   24.17    1.90   1 
   0   4   2   29.47    1.90   1 
   0   4  -3    4.11    1.43   1 
   0   4   3    5.10    1.32   1 
   0   4  -4   15.25    1.76   1 
   0   4   4   17.73    1.54   1 
   0   4  -5   -1.50    1.43   1 
   0   4   5    1.07    1.18   1 
   0  -4   6    6.58    1.66   1 
   0   4   6    9.07    1.76   1 
   0  -4   7   13.73    2.12   1 
   0   4   7   13.49    1.57   1 
   0  -4   8   22.92    2.03   1 
   0   4   8   25.49    2.02   1 
   0  -4   9    2.72    1.55   1 
   0   4   9    6.26    1.69   1 
   0  -4  10   38.48    2.59   1 
   0   4  10   48.42    2.72   1 
   0  -4  11    4.13    1.85   1 
   0   4  11    6.43    2.00   1 
   0  -4  12   -0.99    1.63   1 
   0   4  12   -0.41    1.77   1 
   0  -4  13    5.94    2.08   1 
   0   4  13    9.92    2.71   1 
   0  -4  14    9.41    2.55   1 
   0   5   0   -1.26    1.07   1 
   0   5  -1   17.56    1.87   1 
   0   5  -2  171.06    5.17   1 
   0   5   2  172.01    4.81   1 
   0   5  -3    0.43    1.41   1 
   0   5   3   -0.71    1.16   1 
   0   5  -4   -0.01    1.49   1 
   0   5   4    0.44    1.27   1 
   0   5  -5   34.06    2.83   1 
   0   5   5   41.46    2.46   1 
   0  -5   6   38.38    2.53   1 
   0   5   6   43.27    2.65   1 
   0  -5   7   -0.38    1.34   1 
   0   5   7    0.23    1.38   1 
   0  -5   8   17.30    2.14   1 
   0   5   8   17.70    2.03   1 
   0  -5   9   15.69    2.58   1 
   0   5   9   19.01    2.17   1 
   0  -5  10    1.11    1.83   1 
   0   5  10    1.24    1.85   1 
   0  -5  11    2.58    1.86   1 
   0   5  11    5.53    2.16   1 
   0  -5  12   15.69    2.76   1 
   0   5  12   21.58    3.06   1 
   0  -5  13    7.23    2.49   1 
   0   5  13   11.81    2.81   1 
   0  -5  14    3.24    2.19   1 
   0  -5  15    1.47    2.36   1 
   0   6   0  117.79    4.53   1 
   0   6  -1   25.43    2.33   1 
   0   6   1   25.39    2.30   1 
   0   6  -2    2.28    1.82   1 
   0   6   2    2.21    1.49   1 
   0   6  -3  172.98    5.92   1 
   0   6   3  190.37    5.60   1 
   0   6  -4   39.72    3.02   1 
   0   6   4   38.70    2.63   1 
   0   6  -5   49.41    3.43   1 
   0   6   5   50.90    2.99   1 
   0   6  -6    0.77    1.99   1 
   0   6   6    1.14    1.73   1 
   0  -6   7   64.66    3.66   1 
   0   6   7   72.98    3.54   1 
   0  -6   8   19.06    3.05   1 
   0   6   8   22.40    2.28   1 
   0  -6   9   19.05    3.04   1 
   0   6   9   18.76    2.90   1 
   0  -6  10    0.84    1.91   1 
   0   6  10    1.68    1.99   1 
   0  -6  11   28.12    3.75   1 
   0   6  11   28.31    2.78   1 
   0  -6  12    0.03    2.12   1 
   0  -6  13    0.43    2.20   1 
   0   6  13    1.16    2.67   1 
   0  -6  14   -0.85    2.16   1 
   0  -6  15   10.59    3.02   1 
   0   7   0   -0.40    1.72   1 
   0   7  -1  142.10    5.55   1 
   0   7   1  142.79    5.32   1 
   0   7  -2   15.60    2.79   1 
   0   7   2   14.05    2.67   1 
   0   7  -3    3.77    2.15   1 
   0   7   3    4.30    1.85   1 
   0   7  -4    0.10    1.90   1 
   0   7   4    0.52    1.61   1 
   0   7  -5   55.27    3.90   1 
   0   7   5   58.87    3.60   1 
   0   7  -6   24.67    3.81   1 
   0   7   6   27.26    2.57   1 
   0  -7   7   26.64    2.70   1 
   0   7   7   30.12    2.70   1 
   0  -7   8   23.17    3.46   1 
   0   7   8   22.69    2.59   1 
   0  -7   9  150.54    6.03   1 
   0   7   9  146.78    5.59   1 
   0  -7  10    8.35    2.66   1 
   0   7  10    7.84    2.60   1 
   0  -7  11    7.09    2.78   1 
   0   7  11   13.00    3.09   1 
   0  -7  12    9.63    3.06   1 
   0   7  12   12.14    3.30   1 
   0  -7  13   10.64    3.09   1 
   0   7  13   21.04    4.01   1 
   0  -7  14   -0.65    2.46   1 
   0  -7  15    3.32    2.94   1 
   0   8   0    6.50    2.29   1 
   0   8  -1   56.46    3.91   1 
   0   8   1   53.34    3.75   1 
   0   8  -2   -1.36    1.68   1 
   0   8   2    0.15    1.79   1 
   0   8  -3    5.78    2.53   1 
   0   8   3    5.89    2.26   1 
   0   8  -4    0.34    2.05   1 
   0   8   4    0.35    1.88   1 
   0   8  -5   -1.37    1.97   1 
   0   8   5    0.04    1.72   1 
   0   8  -6   12.18    3.46   1 
   0   8   6   16.75    2.95   1 
   0   8  -7    7.78    3.17   1 
   0   8   7   14.05    3.00   1 
   0  -8   8    2.50    2.18   1 
   0   8   8    2.06    2.31   1 
   0  -8   9   -0.87    2.30   1 
   0   8   9    0.77    2.46   1 
   0  -8  10   50.69    4.19   1 
   0   8  10   50.43    3.89   1 
   0  -8  11   12.20    3.47   1 
   0   8  11   21.89    3.88   1 
   0  -8  12    1.78    2.62   1 
   0   8  12    5.07    2.90   1 
   0  -8  13   -1.55    2.57   1 
   0   8  13    2.93    2.99   1 
   0  -8  14    6.06    3.19   1 
   0  -8  15    4.18    3.05   1 
   0   9   0    1.65    2.17   1 
   0   9  -1   19.70    3.56   1 
   0   9   1   21.37    3.57   1 
   0   9  -2    2.89    2.25   1 
   0   9   2    2.42    2.06   1 
   0   9  -3    0.62    2.35   1 
   0   9   3    1.25    2.02   1 
   0   9  -4    8.17    2.96   1 
   0   9   4   11.11    2.94   1 
   0   9  -5    3.13    2.66   1 
   0   9   5    5.35    2.41   1 
   0   9  -6    3.78    3.24   1 
   0   9   6    6.70    2.66   1 
   0   9  -7    0.26    2.83   1 
   0   9   7    1.89    2.36   1 
   0  -9   8   59.55    4.45   1 
   0   9   8   49.50    3.88   1 
   0  -9   9    6.15    3.00   1 
   0   9   9    7.05    2.98   1 
   0  -9  10    2.14    2.65   1 
   0   9  10    6.68    3.22   1 
   0  -9  11    3.52    2.78   1 
   0   9  11    5.72    3.19   1 
   0  -9  12   32.72    3.89   1 
   0   9  12   36.99    4.00   1 
   0  -9  13    6.56    3.48   1 
   0   9  13   10.65    3.93   1 
   0  -9  14    3.67    3.30   1 
   0  -9  15    1.83    3.47   1 
   0  10   0    9.51    3.03   1 
   0  10  -1   10.79    3.09   1 
   0  10   1   11.87    3.37   1 
   0  10  -2    0.71    2.45   1 
   0  10   2   -0.65    2.16   1 
   0  10  -3   11.73    3.23   1 
   0  10   3   10.99    3.21   1 
   0  10  -4    3.83    2.73   1 
   0  10   4    4.17    2.63   1 
   0  10  -5    3.17    3.04   1 
   0  10   5    1.67    2.31   1 
   0  10  -6    8.79    3.68   1 
   0  10   6    9.09    3.12   1 
   0  10  -7    9.33    3.83   1 
   0  10   7    8.35    3.21   1 
   0 -10   8    1.11    2.53   1 
   0  10   8    2.11    2.90   1 
   0 -10   9    6.56    3.24   1 
   0  10   9    5.14    3.14   1 
   0 -10  10   33.09    3.96   1 
   0  10  10   31.63    3.90   1 
   0 -10  11    7.69    3.41   1 
   0  10  11    2.90    3.39   1 
   0 -10  12    2.32    3.50   1 
   0  10  12    1.60    3.49   1 
   0 -10  13   -0.57    3.11   1 
   0  10  13   -1.39    3.52   1 
   0 -10  14    5.35    3.59   1 
   0 -10  15   15.37    4.49   1 
   0  11   0    7.62    2.91   1 
   0  11  -1   45.80    4.42   1 
   0  11   1   45.04    4.24   1 
   0  11  -2    4.76    2.98   1 
   0  11   2    3.80    2.84   1 
   0  11  -3    2.19    2.72   1 
   0  11   3    1.97    2.73   1 
   0  11  -4    5.17    3.04   1 
   0  11   4    4.07    2.82   1 
   0  11  -5    7.48    3.32   1 
   0  11   5    6.24    3.22   1 
   0  11  -6    4.60    3.49   1 
   0  11   6    2.35    2.93   1 
   0  11  -7   -0.93    3.33   1 
   0  11   7   -1.63    2.73   1 
   0 -11   8    5.25    3.19   1 
   0  11   8    3.41    3.25   1 
   0 -11   9   77.96    5.83   1 
   0  11   9   75.31    5.57   1 
   0 -11  10   -0.35    3.14   1 
   0  11  10    4.94    3.69   1 
   0 -11  11    1.74    3.53   1 
   0  11  11    1.51    3.80   1 
   0 -11  12    0.81    3.56   1 
   0  11  12    1.13    4.16   1 
   0 -11  13   33.68    5.80   1 
   0  11  13   29.05    5.67   1 
   0 -11  14    1.16    3.97   1 
   0 -11  15    4.42    4.42   1 
   0  12   0    6.08    3.05   1 
   0  12  -1   13.50    3.94   1 
   0  12   1   10.59    3.45   1 
   0  12  -2    2.16    2.88   1 
   0  12   2    1.23    2.79   1 
   0  12  -3    9.20    3.55   1 
   0  12   3    9.07    3.60   1 
   0  12  -4   -1.54    2.70   1 
   0  12   4   -0.23    2.78   1 
   0  12  -5   -0.93    3.25   1 
   0  12   5   -0.56    2.80   1 
   0  12  -6    3.67    3.69   1 
   0  12   6    4.43    3.28   1 
   0  12  -7   43.86    5.26   1 
   0  12   7   34.97    4.20   1 
   0 -12   8    2.24    2.93   1 
   0  12   8    2.98    3.40   1 
   0 -12   9    5.76    3.87   1 
   0  12   9    7.92    4.00   1 
   0 -12  10    3.44    3.79   1 
   0  12  10    7.35    3.92   1 
   0 -12  11   42.33    5.02   1 
   0  12  11   41.74    5.00   1 
   0 -12  12    2.44    3.76   1 
   0  12  12    4.72    4.43   1 
   0 -12  13    1.46    4.22   1 
   0 -12  14    3.25    4.28   1 
   0 -12  15   23.32    6.03   1 
   0  13   0   -0.53    3.13   1 
   0  13  -1    2.69    3.10   1 
   0  13   1    5.89    3.56   1 
   0  13  -2    2.79    3.11   1 
   0  13   2    5.02    3.35   1 
   0  13  -3    0.24    3.13   1 
   0  13   3    0.46    3.33   1 
   0  13  -4   -0.36    3.31   1 
   0  13   4   -0.64    2.87   1 
   0  13  -5    5.94    4.34   1 
   0  13   5    5.67    3.75   1 
   0  13  -6    8.28    4.15   1 
   0  13   6    9.98    4.14   1 
   0  13  -7    0.57    4.00   1 
   0  13   7    0.99    3.54   1 
   0 -13   8   26.01    5.28   1 
   0  13   8   19.32    5.35   1 
   0 -13   9   12.34    4.49   1 
   0  13   9   10.88    4.63   1 
   0 -13  10    3.11    3.83   1 
   0  13  10    2.70    4.44   1 
   0 -13  11    3.40    4.18   1 
   0  13  11    0.35    4.55   1 
   0 -13  12   22.00    5.32   1 
   0  13  12   22.66    6.15   1 
   0 -13  13    3.75    5.02   1 
   0 -13  14   -0.31    4.44   1 
   0 -13  15   -0.12    4.83   1 
   0  14   0    4.74    3.40   1 
   0  14  -1    0.49    3.15   1 
   0  14   1    2.06    3.42   1 
   0  14  -2    8.49    3.93   1 
   0  14   2   12.23    4.51   1 
   0  14  -3    1.04    3.27   1 
   0  14   3    0.34    3.30   1 
   0  14  -4    0.17    3.82   1 
   0  14   4    2.00    3.55   1 
   0  14  -5   -2.58    3.98   1 
   0  14   5   -1.04    3.46   1 
   0  14  -6    1.04    3.95   1 
   0  14   6    1.05    3.46   1 
   0 -14   7    8.00    3.87   1 
   0  14   7    3.88    4.05   1 
   0 -14   8    2.35    3.60   1 
   0  14   8    2.30    4.12   1 
   0 -14   9    8.31    4.42   1 
   0  14   9    6.89    4.51   1 
   0 -14  10   50.68    7.45   1 
   0  14  10   37.04    6.74   1 
   0 -14  11    3.72    4.50   1 
   0  14  11   -1.08    4.53   1 
   0 -14  12    3.38    4.12   1 
   0  14  12   -1.23    4.81   1 
   0 -14  13    0.16    4.92   1 
   0 -14  14    9.85    5.51   1 
   0 -14  15   -6.05    5.31   1 
   0  15   0    2.44    3.68   1 
   0  15  -1   16.29    4.97   1 
   0  15   1   19.78    5.13   1 
   0  15  -2    0.21    3.56   1 
   0  15   2    3.25    3.82   1 
   0  15  -3   -1.84    3.50   1 
   0  15   3   -0.16    3.96   1 
   0  15  -4   -0.18    4.00   1 
   0  15   4   -2.02    3.96   1 
   0  15  -5   -0.92    4.12   1 
   0  15   5   -1.40    3.71   1 
   0  15  -6    0.54    4.55   1 
   0  15   6   -1.46    3.88   1 
   0 -15   7    1.09    3.21   1 
   0  15   7   -3.54    3.73   1 
   0 -15   8    8.33    4.32   1 
   0  15   8    5.02    4.35   1 
   0 -15   9   16.15    5.28   1 
   0  15   9   11.06    5.37   1 
   0 -15  10    0.62    4.11   1 
   0  15  10   -1.70    4.64   1 
   0 -15  11    7.53    5.66   1 
   0  15  11   -0.04    5.47   1 
   0 -15  12    8.70    5.17   1 
   0  15  12    3.71    5.97   1 
   0 -15  13    1.01    5.35   1 
   0  16   0   -1.80    3.89   1 
   0  16  -1   10.86    4.81   1 
   0  16   1    0.43    4.15   1 
   0  16  -2    0.04    4.04   1 
   0  16   2   -3.07    3.66   1 
   0  16  -3    6.24    4.96   1 
   0  16   3    3.58    4.06   1 
   0  16  -4    0.48    4.75   1 
   0  16   4   -1.69    3.78   1 
   0  16  -5   -2.75    4.38   1 
   0  16   5    1.39    4.54   1 
   0  16   6    8.26    4.85   1 
   0 -16   7   17.09    5.29   1 
   0  16   7   17.57    6.22   1 
   0 -16   8    1.61    3.86   1 
   0  16   8    1.14    5.20   1 
   0 -16   9   -0.11    4.35   1 
   0  16   9   -2.11    5.01   1 
   0 -16  10    2.84    4.63   1 
   0  16  10    0.61    5.60   1 
   0 -16  11    6.55    5.58   1 
   0  16  11    4.44    5.70   1 
   0 -16  12    0.59    5.06   1 
   0  17   0   -0.54    4.81   1 
   0  17  -1    4.18    4.91   1 
   0  17   1    3.93    4.17   1 
   0  17  -2    2.91    5.13   1 
   0  17   2    4.00    4.74   1 
   0  17  -3    0.38    4.50   1 
   0  17   3    1.31    4.23   1 
   0  17  -4   -3.44    4.52   1 
   0  17   4    1.51    4.59   1 
   0  17  -5   10.12    5.74   1 
   0  17   5   10.18    5.11   1 
   0 -17   6    5.85    4.27   1 
   0  17   6    3.78    4.91   1 
   0 -17   7   -2.32    3.80   1 
   0  17   7   -2.49    4.33   1 
   0 -17   8    3.16    4.71   1 
   0  17   8    0.44    4.86   1 
   0 -17   9    7.37    5.44   1 
   0  17   9   10.29    5.71   1 
   0 -17  10    2.13    4.97   1 
   0  17  10   -3.19    5.44   1 
   0  18   0    8.44    5.41   1 
   0  18  -1    0.34    5.05   1 
   0  18   1    3.24    4.91   1 
   0  18  -2   -0.37    5.31   1 
   0  18   2   -0.56    4.53   1 
   0  18  -3   -1.92    4.81   1 
   0  18   3   -1.67    4.45   1 
   0  18  -4    3.69    5.57   1 
   0  18   4    4.41    4.90   1 
   0 -18   5    0.69    4.10   1 
   0  18   5   -1.27    5.15   1 
   0 -18   6   -2.43    3.99   1 
   0  18   6   -0.37    5.36   1 
   0 -18   7    7.47    4.88   1 
   0  18   7   10.26    6.18   1 
   0  19   0   -0.75    5.44   1 
   0  19  -1    3.75    5.47   1 
   0  19   1   -1.00    6.13   1 
   0  19  -2    4.89    5.97   1 
   0  19   2    5.76    5.95   1 
  -1   0   1   -0.01    0.15   1 
   1   0  -1    0.16    0.18   1 
   1   0   0   -0.20    0.16   1 
   1   0   1    0.32    0.29   1 
   1   0   2  415.80    5.23   1 
   1   0   3    0.52    0.55   1 
   1   0   4    3.20    0.86   1 
   1   0   5    1.54    0.89   1 
   1   0   6  283.79    4.95   1 
   1   0   7    3.75    1.16   1 
   1   0   8   -0.16    1.13   1 
   1   0   9   11.18    1.88   1 
   1   0  10   -0.70    1.32   1 
   1   0  11    1.83    1.68   1 
   1   0  12   11.93    2.29   1 
   1   0  13    8.37    2.17   1 
   1   0  14   28.66    2.66   1 
  -1  -1   8  208.47    3.76   1 
  -1  -1   7   88.83    2.32   1 
  -1  -1   6    4.86    0.87   1 
   1   1  -4    1.63    0.75   1 
   1   1  -3   46.68    1.43   1 
  -1   1   2    0.26    0.33   1 
   1   1  -2    0.40    0.49   1 
   1  -1  -1    2.27    0.44   1 
   1   1  -1    2.85    0.57   1 
   1  -1   1  110.30    2.14   1 
   1   1   1  116.58    2.31   1 
   1  -1   2    3.06    0.69   1 
   1   1   2    3.92    0.74   1 
   1  -1   3    8.01    0.81   1 
   1   1   3    9.98    0.90   1 
   1  -1   4  470.46    6.05   1 
   1   1   4  479.54    6.14   1 
   1  -1   5   28.23    1.56   1 
   1   1   5   28.47    1.56   1 
   1  -1   6    2.14    1.01   1 
   1   1   6    2.22    1.01   1 
   1  -1   7   58.89    2.48   1 
   1   1   7   59.56    2.38   1 
   1  -1   8   77.37    2.99   1 
   1   1   8   67.54    2.69   1 
   1  -1   9    6.56    1.65   1 
   1   1   9    4.75    1.45   1 
   1  -1  10   61.78    2.96   1 
   1   1  10   53.38    2.62   1 
   1  -1  11   15.12    2.42   1 
   1   1  11   13.43    2.17   1 
   1  -1  12    1.75    1.73   1 
   1   1  12   -0.22    1.53   1 
   1  -1  13    1.75    1.85   1 
   1   1  13    1.19    1.79   1 
   1  -1  14   12.12    2.78   1 
   1   1  14    7.80    2.24   1 
  -1  -2  13    6.09    1.97   1 
  -1  -2  12    3.35    1.66   1 
  -1  -2  11    6.15    1.63   1 
  -1  -2  10    0.99    1.27   1 
  -1  -2   9  123.94    3.33   1 
  -1  -2   8    6.67    1.26   1 
  -1  -2   7    1.93    1.00   1 
  -1  -2   6   35.56    1.73   1 
  -1   2   6   35.54    1.46   1 
   1   2  -5    3.86    1.28   1 
   1   2  -4    7.75    1.42   1 
  -1   2   3   59.31    1.73   1 
  -1   2   2   82.55    2.09   1 
   1   2  -2   77.01    2.24   1 
  -1   2   1  233.31    3.74   1 
   1   2  -1  232.84    4.01   1 
  -1   2   0    9.53    0.93   1 
   1   2   0    9.72    0.92   1 
   1  -2   1   27.65    1.26   1 
   1   2   1   30.38    1.43   1 
   1  -2   2   23.82    1.31   1 
   1   2   2   27.83    1.40   1 
   1  -2   3   11.68    1.04   1 
   1   2   3   11.92    1.06   1 
   1  -2   4  109.25    2.91   1 
   1   2   4  124.09    3.05   1 
   1  -2   5    0.83    0.88   1 
   1   2   5    0.87    0.85   1 
   1  -2   6    1.05    0.90   1 
   1   2   6    0.64    0.95   1 
   1  -2   7   47.98    2.33   1 
   1   2   7   48.89    2.19   1 
   1  -2   8    5.93    1.53   1 
   1   2   8    5.22    1.37   1 
   1  -2   9   54.39    2.75   1 
   1   2   9   53.97    2.49   1 
   1  -2  10   -0.56    1.37   1 
   1   2  10    0.92    1.32   1 
   1  -2  11    4.73    2.05   1 
   1   2  11    2.87    1.63   1 
   1  -2  12    2.57    1.92   1 
   1   2  12    1.69    1.61   1 
   1  -2  13    0.14    1.89   1 
   1   2  13   -0.46    1.71   1 
   1  -2  14    0.07    2.11   1 
   1   2  14   -0.14    1.94   1 
  -1  -3  14   13.98    2.55   1 
  -1  -3  13    6.85    2.08   1 
  -1  -3  12   -0.30    1.50   1 
  -1  -3  12   -0.32    1.53   1 
  -1  -3  11   13.91    2.17   1 
  -1  -3  10   14.52    2.05   1 
  -1  -3   9   16.07    1.57   1 
  -1   3   9   18.89    1.57   1 
  -1  -3   8    2.01    1.23   1 
  -1   3   8    4.21    1.29   1 
  -1  -3   7  109.46    3.43   1 
  -1   3   7  118.88    3.05   1 
  -1   3   6   76.18    2.47   1 
   1   3  -6   71.85    3.09   1 
  -1   3   5    2.35    0.93   1 
   1   3  -5   -1.05    1.10   1 
  -1   3   4   16.06    1.19   1 
   1   3  -4   15.42    1.54   1 
  -1   3   3  140.53    3.25   1 
   1   3  -3  141.94    3.73   1 
  -1   3   2    4.13    1.05   1 
   1   3  -2    4.65    1.20   1 
  -1   3   1    5.10    1.10   1 
   1   3  -1    4.21    1.13   1 
  -1   3   0  326.91    5.39   1 
   1   3   0  343.93    5.85   1 
  -1   3  -1  197.22    4.42   1 
   1   3   1  207.21    4.36   1 
   1  -3   2   62.84    2.35   1 
   1   3   2   71.00    2.66   1 
   1  -3   3    4.15    1.12   1 
   1   3   3    5.67    1.22   1 
   1  -3   4    1.44    0.89   1 
   1   3   4    2.45    1.12   1 
   1  -3   5    4.01    1.21   1 
   1   3   5    6.15    1.38   1 
   1  -3   6    4.61    1.31   1 
   1   3   6    5.24    1.34   1 
   1  -3   7    1.08    1.12   1 
   1   3   7    2.65    1.26   1 
   1  -3   8    4.33    1.44   1 
   1   3   8    2.89    1.37   1 
   1  -3   9    8.83    1.93   1 
   1   3   9    7.70    1.72   1 
   1  -3  10   12.36    2.28   1 
   1   3  10   14.67    1.79   1 
   1  -3  11   23.70    2.30   1 
   1   3  11   22.51    2.11   1 
   1  -3  12    1.96    1.85   1 
   1   3  12    1.62    1.80   1 
   1  -3  13   10.40    2.43   1 
   1   3  13   11.82    2.48   1 
   1  -3  14    1.58    2.38   1 
  -1  -4  14    1.06    2.02   1 
  -1  -4  13    2.62    2.05   1 
  -1  -4  12   12.30    2.31   1 
  -1  -4  11    2.59    1.63   1 
  -1   4  11    4.56    1.87   1 
  -1  -4  10   10.77    2.08   1 
  -1   4  10   11.58    2.09   1 
  -1  -4   9   15.57    1.77   1 
  -1   4   9   18.09    1.81   1 
  -1  -4   8   23.22    2.02   1 
  -1   4   8   25.68    1.91   1 
  -1   4   7    3.36    1.36   1 
  -1   4   6    8.88    1.67   1 
   1   4  -6    9.74    2.21   1 
  -1   4   5   79.25    2.75   1 
   1   4  -5   78.30    3.50   1 
  -1   4   4    2.13    1.08   1 
   1   4  -4    0.29    1.41   1 
  -1   4   3   24.89    1.71   1 
   1   4  -3   19.08    1.78   1 
  -1   4   2    0.69    0.98   1 
   1   4  -2    0.29    1.08   1 
  -1   4   1  167.31    4.28   1 
   1   4  -1  169.13    4.46   1 
  -1   4   0   13.56    1.52   1 
   1   4   0   14.96    1.54   1 
  -1   4  -1    6.23    1.57   1 
   1   4   1    7.42    1.55   1 
  -1   4  -2  360.54    7.05   1 
   1   4   2  365.57    6.52   1 
   1  -4   3   87.21    3.21   1 
   1   4   3   94.18    3.35   1 
   1  -4   4   -0.32    1.00   1 
   1   4   4   -0.38    1.04   1 
   1  -4   5   10.88    1.89   1 
   1   4   5   13.52    1.62   1 
   1  -4   6   27.22    2.15   1 
   1   4   6   30.71    2.12   1 
   1  -4   7   96.02    3.67   1 
   1   4   7   99.70    3.58   1 
   1  -4   8    8.91    1.90   1 
   1   4   8   10.52    2.06   1 
   1  -4   9    0.68    1.43   1 
   1   4   9    1.75    1.52   1 
   1  -4  10    3.87    1.82   1 
   1   4  10    8.06    2.03   1 
   1  -4  11    3.29    1.94   1 
   1   4  11    5.23    1.99   1 
   1  -4  12    1.92    1.97   1 
   1   4  12    6.42    2.20   1 
   1  -4  13    8.61    2.47   1 
   1   4  13   13.37    2.87   1 
   1  -4  14   -0.63    2.11   1 
   1  -4  15    5.36    2.52   1 
  -1  -5  14    5.29    2.31   1 
  -1  -5  13   -0.16    1.88   1 
  -1   5  13    0.45    2.26   1 
  -1  -5  12   -1.31    1.77   1 
  -1   5  12   -0.04    1.84   1 
  -1  -5  11    3.84    1.94   1 
  -1   5  11    5.70    2.20   1 
  -1  -5  10   44.35    2.88   1 
  -1   5  10   55.41    3.10   1 
  -1  -5   9   15.09    2.49   1 
  -1   5   9   16.91    2.51   1 
  -1  -5   8   51.22    3.08   1 
  -1   5   8   55.67    2.90   1 
  -1   5   7    1.60    1.45   1 
   1   5  -7   -0.99    1.67   1 
  -1   5   6   18.83    1.78   1 
   1   5  -6   24.81    3.27   1 
  -1   5   5    1.78    1.31   1 
   1   5  -5    1.49    1.75   1 
  -1   5   4   18.32    1.75   1 
   1   5  -4   20.67    2.23   1 
  -1   5   3    4.51    1.52   1 
   1   5  -3    4.10    1.80   1 
  -1   5   2   78.66    3.23   1 
   1   5  -2   80.45    3.56   1 
  -1   5   1   34.04    2.33   1 
   1   5  -1   31.73    2.36   1 
  -1   5   0  136.03    4.43   1 
   1   5   0  135.27    4.42   1 
  -1   5  -1   12.57    2.10   1 
   1   5   1   13.82    2.19   1 
  -1   5  -2   17.58    2.41   1 
   1   5   2   15.41    1.75   1 
  -1   5  -3   30.75    2.46   1 
   1   5   3   39.82    2.56   1 
   1  -5   4   31.17    2.25   1 
   1   5   4   30.09    2.21   1 
   1  -5   5   12.72    2.25   1 
   1   5   5   11.03    2.11   1 
   1  -5   6    0.17    1.32   1 
   1   5   6    0.77    1.42   1 
   1  -5   7   52.68    3.06   1 
   1   5   7   70.43    3.37   1 
   1  -5   8   61.13    3.31   1 
   1   5   8   71.94    3.51   1 
   1  -5   9   -0.27    1.55   1 
   1   5   9    0.42    1.71   1 
   1  -5  10   23.19    2.45   1 
   1   5  10   29.35    2.55   1 
   1  -5  11   15.37    2.84   1 
   1   5  11   21.17    3.07   1 
   1  -5  12    1.19    2.04   1 
   1   5  12    4.40    2.48   1 
   1  -5  13    1.07    2.15   1 
   1   5  13    0.52    2.33   1 
   1  -5  14   22.42    3.34   1 
   1  -5  15    4.66    2.69   1 
  -1  -6  15    5.40    2.68   1 
  -1  -6  14    1.77    2.26   1 
  -1  -6  13    4.13    2.43   1 
  -1   6  13   10.28    2.85   1 
  -1  -6  12    1.09    2.18   1 
  -1   6  12    0.83    2.38   1 
  -1  -6  11   29.00    2.89   1 
  -1   6  11   28.52    2.69   1 
  -1  -6  10   17.76    3.17   1 
  -1   6  10   23.50    3.05   1 
  -1  -6   9   24.97    3.39   1 
  -1   6   9   19.05    2.23   1 
  -1   6   8    5.72    1.95   1 
  -1   6   7   15.09    2.55   1 
   1   6  -7   15.80    3.17   1 
  -1   6   6   33.60    2.50   1 
   1   6  -6   36.37    3.04   1 
  -1   6   5    1.35    1.52   1 
   1   6  -5    0.49    2.03   1 
  -1   6   4    2.32    1.47   1 
   1   6  -4    0.83    1.75   1 
  -1   6   3    0.30    1.37   1 
   1   6  -3    0.44    1.57   1 
  -1   6   2  168.66    5.24   1 
   1   6  -2  177.55    5.76   1 
  -1   6   1  129.01    4.64   1 
   1   6  -1  130.44    4.76   1 
  -1   6   0    6.05    1.93   1 
   1   6   0    3.96    1.90   1 
  -1   6  -1   97.78    4.12   1 
   1   6   1  105.24    4.30   1 
  -1   6  -2   56.80    3.39   1 
   1   6   2   51.96    3.05   1 
  -1   6  -3   -0.93    1.55   1 
   1   6   3   -0.30    1.52   1 
  -1   6  -4    0.02    1.70   1 
   1   6   4   -0.09    1.43   1 
   1  -6   5   30.30    2.55   1 
   1   6   5   34.70    2.68   1 
   1  -6   6   45.72    3.17   1 
   1   6   6   52.40    3.26   1 
   1  -6   7   12.63    2.63   1 
   1   6   7   13.90    2.80   1 
   1  -6   8    2.35    1.84   1 
   1   6   8    3.36    2.07   1 
   1  -6   9  113.75    4.86   1 
   1   6   9  120.44    4.83   1 
   1  -6  10   18.81    3.21   1 
   1   6  10   24.75    2.82   1 
   1  -6  11   -0.32    2.03   1 
   1   6  11   -0.31    2.25   1 
   1  -6  12    4.09    2.41   1 
   1   6  12    6.55    2.98   1 
   1  -6  13    1.02    2.41   1 
   1   6  13    1.88    2.53   1 
   1  -6  14    2.56    2.47   1 
   1  -6  15   -0.88    2.57   1 
  -1  -7  15    5.93    2.97   1 
  -1  -7  14   15.22    3.39   1 
  -1  -7  13   -1.60    2.37   1 
  -1   7  13   -0.65    2.60   1 
  -1  -7  12    0.48    2.39   1 
  -1   7  12    3.39    2.74   1 
  -1  -7  11   19.61    3.53   1 
  -1   7  11   23.50    2.84   1 
  -1  -7  10   26.65    3.03   1 
  -1   7  10   26.43    2.83   1 
  -1  -7   9    0.90    2.23   1 
  -1   7   9    0.58    2.07   1 
  -1   7   8    3.69    2.15   1 
   1   7  -8    1.75    2.40   1 
  -1   7   7   98.46    4.36   1 
   1   7  -7   91.53    5.13   1 
  -1   7   6   15.37    2.67   1 
   1   7  -6   12.61    3.02   1 
  -1   7   5    1.42    1.69   1 
   1   7  -5    0.70    2.20   1 
  -1   7   4    6.67    2.20   1 
   1   7  -4    7.83    2.65   1 
  -1   7   3   29.22    2.54   1 
   1   7  -3   27.83    2.81   1 
  -1   7   2    8.31    2.27   1 
   1   7  -2    5.13    2.08   1 
  -1   7   1    0.47    1.62   1 
   1   7  -1    0.98    1.67   1 
  -1   7   0   44.34    3.21   1 
   1   7   0   46.30    3.11   1 
  -1   7  -1   23.68    2.45   1 
   1   7   1   26.91    2.69   1 
  -1   7  -2    1.03    1.82   1 
   1   7   2   -0.24    1.65   1 
  -1   7  -3   52.13    3.55   1 
   1   7   3   54.01    3.44   1 
  -1   7  -4    7.10    2.49   1 
   1   7   4    9.79    2.35   1 
   1  -7   5   38.05    3.06   1 
   1   7   5   39.91    2.96   1 
   1  -7   6   20.10    2.42   1 
   1   7   6   20.78    2.44   1 
   1  -7   7   86.02    4.58   1 
   1   7   7   87.04    4.40   1 
   1  -7   8   -0.07    1.88   1 
   1   7   8    0.64    1.97   1 
   1  -7   9   -0.45    2.10   1 
   1   7   9    1.07    2.03   1 
   1  -7  10    1.22    2.19   1 
   1   7  10    4.43    2.44   1 
   1  -7  11   35.59    3.40   1 
   1   7  11   45.16    3.63   1 
   1  -7  12   -2.07    2.25   1 
   1   7  12   -1.24    2.59   1 
   1  -7  13   -1.72    2.29   1 
   1   7  13    2.23    2.89   1 
   1  -7  14   -0.76    2.66   1 
   1  -7  15   10.18    3.25   1 
  -1  -8  15   -0.77    2.82   1 
  -1  -8  14   -0.94    2.74   1 
  -1  -8  13    5.48    3.02   1 
  -1   8  13    7.30    3.35   1 
  -1  -8  12   43.24    3.80   1 
  -1   8  12   48.19    4.07   1 
  -1  -8  11    5.43    2.88   1 
  -1   8  11    5.57    2.88   1 
  -1  -8  10    8.76    3.13   1 
  -1   8  10    9.12    3.06   1 
  -1  -8   9   53.30    4.03   1 
  -1   8   9   54.04    3.86   1 
  -1   8   8   38.81    3.29   1 
   1   8  -8   29.95    3.63   1 
  -1   8   7    2.70    2.04   1 
   1   8  -7    0.91    2.76   1 
  -1   8   6    3.17    2.14   1 
   1   8  -6    1.24    2.52   1 
  -1   8   5   71.57    4.12   1 
   1   8  -5   74.44    4.91   1 
  -1   8   4    8.74    2.40   1 
   1   8  -4    5.13    2.51   1 
  -1   8   3   22.06    3.35   1 
   1   8  -3   21.35    3.70   1 
  -1   8   2   -0.62    1.79   1 
   1   8  -2   -0.67    1.86   1 
  -1   8   1   23.33    3.31   1 
   1   8  -1   25.32    3.60   1 
  -1   8   0    0.11    1.68   1 
   1   8   0    2.79    2.01   1 
  -1   8  -1   20.03    3.21   1 
   1   8   1   19.88    3.06   1 
  -1   8  -2   23.31    2.67   1 
   1   8   2   23.58    2.65   1 
  -1   8  -3    0.89    2.00   1 
   1   8   3    1.99    1.93   1 
  -1   8  -4   -1.64    1.94   1 
   1   8   4    0.26    1.82   1 
  -1   8  -5   -0.06    2.33   1 
   1   8   5    0.72    1.90   1 
   1  -8   6   21.47    3.47   1 
   1   8   6   19.81    3.37   1 
   1  -8   7    4.49    2.53   1 
   1   8   7    4.29    2.23   1 
   1  -8   8   -0.39    2.00   1 
   1   8   8    0.59    2.06   1 
   1  -8   9   11.50    2.91   1 
   1   8   9    9.83    2.81   1 
   1  -8  10   11.03    3.27   1 
   1   8  10    9.97    3.00   1 
   1  -8  11    3.12    2.68   1 
   1   8  11    1.60    2.73   1 
   1  -8  12   12.11    3.51   1 
   1   8  12   14.60    3.78   1 
   1  -8  13    7.70    3.20   1 
   1   8  13   12.66    3.83   1 
   1  -8  14   -0.34    2.92   1 
   1  -8  15    0.55    3.13   1 
  -1  -9  15   -0.89    3.21   1 
  -1  -9  14   22.27    4.71   1 
  -1  -9  13    4.75    3.30   1 
  -1   9  13    4.20    3.53   1 
  -1  -9  12   -0.65    2.71   1 
  -1   9  12    1.28    3.15   1 
  -1  -9  11    4.53    2.87   1 
  -1   9  11    2.16    3.10   1 
  -1  -9  10   37.72    3.93   1 
  -1   9  10   34.64    3.74   1 
  -1  -9   9    1.42    2.50   1 
  -1   9   9    1.70    2.88   1 
  -1   9   8    7.41    2.92   1 
   1   9  -8    2.03    3.14   1 
  -1   9   7   10.00    3.01   1 
   1   9  -7    5.75    3.22   1 
  -1   9   6   29.84    3.10   1 
   1   9  -6   35.66    5.04   1 
  -1   9   5    7.23    2.56   1 
   1   9  -5    4.95    2.81   1 
  -1   9   4    3.26    2.30   1 
   1   9  -4    4.04    2.55   1 
  -1   9   3   18.59    3.47   1 
   1   9  -3   19.66    3.67   1 
  -1   9   2    7.48    2.55   1 
   1   9  -2    5.51    2.65   1 
  -1   9   1    3.40    2.18   1 
   1   9  -1    2.73    2.37   1 
  -1   9   0   89.15    5.09   1 
   1   9   0   86.02    4.91   1 
  -1   9  -1    8.36    2.58   1 
   1   9   1   14.25    3.07   1 
  -1   9  -2   26.48    3.16   1 
   1   9   2   25.21    2.96   1 
  -1   9  -3    0.54    2.15   1 
   1   9   3    2.58    2.19   1 
  -1   9  -4   -0.34    2.31   1 
   1   9   4    0.14    2.16   1 
  -1   9  -5   -1.67    2.30   1 
   1   9   5    0.63    2.31   1 
   1  -9   6    0.54    1.89   1 
   1   9   6    3.76    2.51   1 
   1  -9   7    2.37    2.45   1 
   1   9   7    2.06    2.30   1 
   1  -9   8   15.06    3.49   1 
   1   9   8   16.21    3.51   1 
   1  -9   9    4.42    2.90   1 
   1   9   9    2.35    2.61   1 
   1  -9  10   31.71    3.72   1 
   1   9  10   27.81    3.36   1 
   1  -9  11   -0.44    2.69   1 
   1   9  11   -0.25    2.89   1 
   1  -9  12   -0.07    2.89   1 
   1   9  12    0.62    3.08   1 
   1  -9  13    1.31    2.97   1 
   1   9  13    1.69    3.66   1 
   1  -9  14    2.64    3.36   1 
   1  -9  15    0.43    3.33   1 
  -1 -10  15    6.03    4.09   1 
  -1 -10  14   -1.62    3.26   1 
  -1 -10  13   -2.05    3.25   1 
  -1  10  13    2.88    3.80   1 
  -1 -10  12   18.63    4.60   1 
  -1  10  12   23.04    4.87   1 
  -1 -10  11   10.63    3.78   1 
  -1  10  11    3.41    3.53   1 
  -1 -10  10   -2.23    2.56   1 
  -1  10  10    1.51    3.33   1 
  -1  10   9   15.25    3.99   1 
  -1  10   8   25.38    4.44   1 
   1  10  -8   23.21    5.01   1 
  -1  10   7    6.58    2.94   1 
   1  10  -7    6.39    3.51   1 
  -1  10   6    3.48    2.80   1 
   1  10  -6    4.32    3.07   1 
  -1  10   5   -0.10    2.41   1 
   1  10  -5    1.85    2.78   1 
  -1  10   4   24.95    4.10   1 
   1  10  -4   26.05    4.54   1 
  -1  10   3    0.26    2.13   1 
   1  10  -3    2.53    2.73   1 
  -1  10   2   18.86    3.53   1 
   1  10  -2   17.68    3.83   1 
  -1  10   1   24.34    4.07   1 
   1  10  -1   22.68    3.99   1 
  -1  10   0    6.56    2.82   1 
   1  10   0    7.11    3.06   1 
  -1  10  -1   37.41    3.64   1 
   1  10   1   39.88    3.67   1 
  -1  10  -2   16.85    3.54   1 
   1  10   2   14.23    3.33   1 
  -1  10  -3    2.56    2.69   1 
   1  10   3   -1.25    2.16   1 
  -1  10  -4   22.70    4.35   1 
   1  10   4   21.02    3.82   1 
  -1  10  -5   31.64    3.81   1 
   1  10   5   28.09    3.17   1 
   1 -10   6   21.26    3.79   1 
   1  10   6   17.35    3.61   1 
   1 -10   7   15.91    3.58   1 
   1  10   7   14.61    3.62   1 
   1 -10   8    5.34    3.17   1 
   1  10   8    8.83    3.45   1 
   1 -10   9   43.40    4.34   1 
   1  10   9   44.76    4.20   1 
   1 -10  10   17.38    3.95   1 
   1  10  10   18.20    4.28   1 
   1 -10  11    1.10    3.07   1 
   1  10  11    0.42    3.07   1 
   1 -10  12    3.63    3.45   1 
   1  10  12    0.51    3.42   1 
   1 -10  13    6.17    3.67   1 
   1  10  13   11.21    4.08   1 
   1 -10  14   -0.78    3.40   1 
   1 -10  15    5.48    3.98   1 
  -1 -11  15   29.40    5.91   1 
  -1 -11  14    2.99    4.20   1 
  -1 -11  13    3.88    3.65   1 
  -1 -11  12    2.83    3.68   1 
  -1  11  12   -0.41    3.86   1 
  -1 -11  11   13.98    4.35   1 
  -1  11  11   14.07    4.27   1 
  -1 -11  10    3.36    3.25   1 
  -1  11  10    1.01    3.54   1 
  -1  11   9   16.05    4.42   1 
  -1  11   8    0.65    3.21   1 
   1  11  -8   -0.43    3.47   1 
  -1  11   7   49.64    4.50   1 
   1  11  -7   51.26    5.18   1 
  -1  11   6   -0.60    2.81   1 
   1  11  -6    1.30    2.91   1 
  -1  11   5   -0.76    2.46   1 
   1  11  -5   -0.92    2.67   1 
  -1  11   4    5.93    2.89   1 
   1  11  -4    7.69    3.54   1 
  -1  11   3    3.81    2.82   1 
   1  11  -3    3.23    2.88   1 
  -1  11   2    2.23    2.60   1 
   1  11  -2    1.88    2.72   1 
  -1  11   1   18.17    4.02   1 
   1  11  -1   16.89    4.13   1 
  -1  11   0    9.43    3.08   1 
   1  11   0   11.12    3.36   1 
  -1  11  -1   17.29    3.76   1 
   1  11   1   19.35    4.06   1 
  -1  11  -2    4.10    2.87   1 
   1  11   2    4.09    2.64   1 
  -1  11  -3   39.09    4.21   1 
   1  11   3   37.29    3.91   1 
  -1  11  -4   12.97    3.88   1 
   1  11   4   11.64    3.49   1 
  -1  11  -5    1.34    2.78   1 
   1  11   5    1.72    2.52   1 
   1 -11   6    4.59    2.68   1 
   1  11   6    4.86    3.05   1 
   1 -11   7   32.61    4.82   1 
   1  11   7   34.50    5.09   1 
   1 -11   8    2.07    2.92   1 
   1  11   8    2.16    3.13   1 
   1 -11   9   14.51    4.04   1 
   1  11   9   14.22    4.14   1 
   1 -11  10   22.05    4.61   1 
   1  11  10   17.23    4.45   1 
   1 -11  11   16.52    4.73   1 
   1  11  11   13.38    4.37   1 
   1 -11  12    1.82    3.58   1 
   1  11  12    2.69    3.89   1 
   1 -11  13    0.80    3.76   1 
   1  11  13    0.30    3.97   1 
   1 -11  14    3.27    3.93   1 
   1 -11  15   29.29    5.90   1 
  -1 -12  15    0.50    4.75   1 
  -1 -12  14   -1.07    4.45   1 
  -1 -12  13    7.13    4.25   1 
  -1 -12  12    1.30    3.95   1 
  -1  12  12    1.68    4.17   1 
  -1 -12  11   13.92    4.58   1 
  -1  12  11   10.23    4.47   1 
  -1 -12  10    3.63    3.48   1 
  -1  12  10    4.42    3.74   1 
  -1  12   9   16.40    4.57   1 
  -1  12   8   23.20    4.81   1 
   1  12  -8   22.66    5.35   1 
  -1  12   7    4.15    3.42   1 
   1  12  -7    7.89    4.35   1 
  -1  12   6   -1.54    2.91   1 
   1  12  -6   -1.47    3.09   1 
  -1  12   5   -0.31    2.85   1 
   1  12  -5   -1.80    3.12   1 
  -1  12   4    0.04    2.72   1 
   1  12  -4    0.81    3.14   1 
  -1  12   3    3.40    2.94   1 
   1  12  -3    2.32    3.35   1 
  -1  12   2    4.08    3.16   1 
   1  12  -2    4.29    3.12   1 
  -1  12   1    9.70    3.55   1 
   1  12  -1    4.85    3.42   1 
  -1  12   0    2.95    2.82   1 
   1  12   0    1.93    2.79   1 
  -1  12  -1   33.28    4.16   1 
   1  12   1   42.20    5.55   1 
  -1  12  -2    8.34    3.29   1 
   1  12   2   11.95    3.71   1 
  -1  12  -3   16.27    4.54   1 
   1  12   3   15.64    4.12   1 
  -1  12  -4    7.06    3.72   1 
   1  12   4    5.25    3.37   1 
  -1  12  -5   40.28    6.25   1 
   1  12   5   34.01    5.09   1 
   1 -12   6    1.45    2.51   1 
   1  12   6    0.72    3.05   1 
   1 -12   7    2.16    2.60   1 
   1  12   7    2.19    3.31   1 
   1 -12   8   10.68    3.92   1 
   1  12   8    7.26    3.69   1 
   1 -12   9   65.23    5.54   1 
   1  12   9   57.63    5.39   1 
   1 -12  10    3.04    3.58   1 
   1  12  10    5.32    3.82   1 
   1 -12  11    0.85    3.78   1 
   1  12  11    0.35    4.02   1 
   1 -12  12    7.42    4.55   1 
   1  12  12    8.71    4.63   1 
   1 -12  13   37.97    6.53   1 
   1  12  13   39.97    6.70   1 
   1 -12  14    2.02    4.47   1 
   1 -12  15    1.20    4.57   1 
  -1 -13  15   -0.74    4.83   1 
  -1 -13  14    8.11    5.39   1 
  -1 -13  13   -0.21    4.17   1 
  -1 -13  12   -4.38    3.83   1 
  -1  13  12    0.50    4.88   1 
  -1 -13  11    8.00    4.31   1 
  -1  13  11    8.90    4.87   1 
  -1 -13  10   40.47    6.17   1 
  -1  13  10   30.83    6.05   1 
  -1 -13   9    6.85    3.82   1 
  -1  13   9    9.01    4.25   1 
  -1  13   8   -1.20    3.65   1 
   1  13  -8    0.01    3.70   1 
  -1  13   7    3.58    3.42   1 
   1  13  -7    1.34    4.10   1 
  -1  13   6    3.54    3.58   1 
   1  13  -6    1.89    4.20   1 
  -1  13   5   -0.78    3.17   1 
   1  13  -5    1.30    3.58   1 
  -1  13   4    0.64    3.23   1 
   1  13  -4    2.15    3.49   1 
  -1  13   3    3.52    3.16   1 
   1  13  -3    0.56    3.35   1 
  -1  13   2   11.29    3.77   1 
   1  13  -2   11.30    4.04   1 
  -1  13   1    2.51    2.92   1 
   1  13  -1    4.00    3.30   1 
  -1  13   0   21.83    4.72   1 
   1  13   0   21.71    4.87   1 
  -1  13  -1    3.38    3.25   1 
   1  13   1    0.92    3.16   1 
  -1  13  -2    2.57    3.34   1 
   1  13   2    0.74    3.18   1 
  -1  13  -3   15.85    4.81   1 
   1  13   3   13.63    4.28   1 
  -1  13  -4   -2.42    2.95   1 
   1  13   4    3.25    3.42   1 
  -1  13  -5    2.52    3.81   1 
   1  13   5    0.08    3.14   1 
   1 -13   6    1.13    2.94   1 
   1  13   6    1.27    3.46   1 
   1 -13   7   40.46    5.83   1 
   1  13   7   34.77    5.70   1 
   1 -13   8   30.72    5.80   1 
   1  13   8   24.96    5.25   1 
   1 -13   9    0.81    3.29   1 
   1  13   9    2.93    4.12   1 
   1 -13  10   32.75    5.98   1 
   1  13  10   32.90    6.41   1 
   1 -13  11   39.36    6.70   1 
   1  13  11   29.74    6.25   1 
   1 -13  12   -2.00    4.11   1 
   1  13  12   -1.02    4.45   1 
   1 -13  13    0.09    4.40   1 
   1 -13  14    6.47    5.23   1 
   1 -13  15    7.51    5.63   1 
  -1 -14  15   -0.80    5.51   1 
  -1 -14  14    2.35    5.39   1 
  -1 -14  13    1.07    4.79   1 
  -1 -14  12   12.53    5.18   1 
  -1  14  12    9.94    5.52   1 
  -1 -14  11   -1.51    4.15   1 
  -1  14  11   -2.30    4.68   1 
  -1 -14  10    0.35    3.60   1 
  -1  14  10    0.05    4.53   1 
  -1 -14   9    1.72    3.75   1 
  -1  14   9    1.35    4.49   1 
  -1  14   8   14.97    5.38   1 
   1  14  -8   16.05    5.97   1 
  -1  14   7    2.02    3.98   1 
   1  14  -7    0.33    4.33   1 
  -1  14   6    0.39    3.68   1 
   1  14  -6   -0.76    4.21   1 
  -1  14   5    1.20    3.41   1 
   1  14  -5   -3.73    3.66   1 
  -1  14   4    3.29    3.52   1 
   1  14  -4    2.44    3.87   1 
  -1  14   3   -2.62    2.92   1 
   1  14  -3   -1.78    3.20   1 
  -1  14   2    8.49    3.87   1 
   1  14  -2    9.01    4.23   1 
  -1  14   1    1.45    3.38   1 
   1  14  -1    1.32    3.38   1 
  -1  14   0    2.92    3.42   1 
   1  14   0    2.43    3.39   1 
  -1  14  -1    2.17    3.34   1 
   1  14   1   -0.44    3.24   1 
  -1  14  -2    6.64    4.13   1 
   1  14   2    8.44    4.10   1 
  -1  14  -3   -0.14    3.71   1 
   1  14   3   -3.74    3.30   1 
  -1  14  -4   -0.63    3.58   1 
   1  14   4    1.78    3.65   1 
   1  14   5    3.05    3.78   1 
   1 -14   6    8.32    3.89   1 
   1  14   6    9.44    4.32   1 
   1 -14   7    0.26    3.09   1 
   1  14   7   -0.69    3.69   1 
   1 -14   8   13.71    4.71   1 
   1  14   8   12.14    4.55   1 
   1 -14   9    9.25    4.42   1 
   1  14   9    5.05    4.60   1 
   1 -14  10   11.24    4.66   1 
   1  14  10   12.24    5.13   1 
   1 -14  11   -0.21    3.92   1 
   1  14  11    1.54    4.74   1 
   1 -14  12   11.00    5.30   1 
   1  14  12   10.67    6.06   1 
   1 -14  13    2.23    4.95   1 
   1 -14  14   -4.58    4.72   1 
   1 -14  15   -4.40    5.31   1 
  -1 -15  14   18.80    7.04   1 
  -1 -15  13    4.10    5.13   1 
  -1 -15  12   -2.31    4.54   1 
  -1  15  12   -1.22    5.24   1 
  -1 -15  11   -0.03    4.62   1 
  -1  15  11   -0.10    4.94   1 
  -1 -15  10   14.41    5.27   1 
  -1  15  10    9.46    5.22   1 
  -1 -15   9    2.68    4.35   1 
  -1  15   9    4.57    4.81   1 
  -1  15   8   -4.29    3.73   1 
   1  15  -8   -2.28    4.83   1 
  -1  15   7   11.71    4.89   1 
   1  15  -7   11.05    5.37   1 
  -1  15   6    9.14    4.37   1 
   1  15  -6    5.98    5.22   1 
  -1  15   5    7.43    4.14   1 
   1  15  -5    5.30    4.73   1 
  -1  15   4    1.66    3.83   1 
   1  15  -4    0.60    3.94   1 
  -1  15   3    2.84    3.78   1 
   1  15  -3    2.38    3.76   1 
  -1  15   2    3.27    3.65   1 
   1  15  -2    4.46    3.78   1 
  -1  15   1   -1.65    3.38   1 
   1  15  -1    3.91    3.89   1 
  -1  15   0   -0.33    3.60   1 
   1  15   0   -2.09    3.72   1 
  -1  15  -1    4.18    4.27   1 
   1  15   1    3.74    3.82   1 
  -1  15  -2    0.98    4.08   1 
   1  15   2    0.17    3.51   1 
  -1  15  -3    6.56    4.17   1 
   1  15   3    4.07    4.00   1 
  -1  15  -4    8.01    4.66   1 
   1  15   4    1.86    3.99   1 
   1 -15   5    0.77    3.20   1 
   1  15   5    2.29    4.04   1 
   1 -15   6    0.58    3.23   1 
   1  15   6   -0.47    4.02   1 
   1 -15   7   12.10    4.56   1 
   1  15   7    9.33    4.92   1 
   1 -15   8    8.94    4.56   1 
   1  15   8    5.33    4.73   1 
   1 -15   9   -1.75    3.81   1 
   1  15   9    2.54    4.84   1 
   1 -15  10   13.18    5.52   1 
   1  15  10   10.58    5.72   1 
   1 -15  11    8.07    5.00   1 
   1  15  11    0.69    5.22   1 
   1 -15  12    5.07    5.28   1 
   1  15  12    1.17    5.50   1 
   1 -15  13   -2.27    4.85   1 
  -1 -16  12   -1.10    5.36   1 
  -1 -16  11    0.65    4.68   1 
  -1  16  11   -3.55    5.39   1 
  -1 -16  10    0.39    4.51   1 
  -1  16  10    0.24    5.39   1 
  -1 -16   9    8.26    4.78   1 
  -1  16   9    6.57    5.58   1 
  -1 -16   8    5.87    4.50   1 
  -1  16   8    7.26    5.05   1 
  -1  16   7    2.56    4.62   1 
   1  16  -7    2.99    5.53   1 
  -1  16   6    0.53    4.47   1 
   1  16  -6    0.97    5.05   1 
  -1  16   5    0.87    4.22   1 
   1  16  -5    1.94    4.51   1 
  -1  16   4    0.57    4.27   1 
   1  16  -4    1.83    4.41   1 
  -1  16   3    2.76    4.10   1 
   1  16  -3   -0.20    3.88   1 
  -1  16   2    2.04    3.98   1 
   1  16  -2    4.18    4.27   1 
  -1  16   1   13.44    4.91   1 
   1  16  -1   15.15    5.04   1 
  -1  16   0   -2.14    4.26   1 
   1  16   0   -3.44    3.86   1 
  -1  16  -1   15.88    5.59   1 
   1  16   1   20.05    5.59   1 
  -1  16  -2    2.34    4.11   1 
   1  16   2    0.90    4.10   1 
  -1  16  -3    2.38    4.39   1 
   1  16   3    7.35    4.54   1 
   1  16   4    0.71    3.93   1 
   1 -16   5   15.13    4.73   1 
   1  16   5   13.78    5.09   1 
   1 -16   6    6.95    3.93   1 
   1  16   6    4.64    4.41   1 
   1 -16   7    1.65    4.03   1 
   1  16   7   -1.64    4.35   1 
   1 -16   8    0.33    4.18   1 
   1  16   8    3.49    4.75   1 
   1 -16   9   25.12    6.35   1 
   1  16   9   22.93    6.35   1 
   1 -16  10   -0.25    4.34   1 
   1  16  10    0.82    5.03   1 
   1 -16  11    4.25    5.26   1 
   1  16  11   -0.74    5.47   1 
   1 -16  12   -1.89    5.29   1 
   1  16  12   -3.26    5.69   1 
  -1 -17  10    7.84    5.43   1 
  -1  17  10    4.66    6.15   1 
  -1 -17   9    2.71    4.68   1 
  -1  17   9    1.07    5.44   1 
  -1 -17   8    9.23    4.96   1 
  -1  17   8    5.01    5.18   1 
  -1  17   7    4.57    5.10   1 
  -1  17   6    0.69    4.72   1 
   1  17  -6   -0.81    4.83   1 
  -1  17   5   -0.36    4.47   1 
   1  17  -5    0.50    5.09   1 
  -1  17   4    7.72    5.16   1 
   1  17  -4    4.79    5.41   1 
  -1  17   3    2.68    4.68   1 
   1  17  -3   -0.80    4.53   1 
  -1  17   2    6.43    4.86   1 
   1  17  -2   10.20    5.19   1 
  -1  17   1   11.09    5.22   1 
   1  17  -1    9.11    5.23   1 
  -1  17   0   13.78    5.72   1 
   1  17   0    7.12    4.93   1 
  -1  17  -1   13.51    5.29   1 
   1  17   1    8.31    4.81   1 
  -1  17  -2   -3.76    4.55   1 
   1  17   2    1.19    4.24   1 
   1  17   3    9.41    5.18   1 
   1 -17   4   -1.16    3.46   1 
   1  17   4   -0.50    4.51   1 
   1 -17   5    1.90    3.72   1 
   1  17   5    0.94    4.82   1 
   1 -17   6    2.61    4.27   1 
   1  17   6   -4.20    5.06   1 
   1 -17   7   21.54    5.93   1 
   1  17   7   16.23    6.44   1 
   1 -17   8    9.32    5.00   1 
   1  17   8    5.17    5.55   1 
   1 -17   9    0.83    4.94   1 
   1  17   9   -0.66    5.60   1 
   1 -17  10    3.06    5.08   1 
   1  17  10   12.16    6.76   1 
  -1 -18   7   -1.34    4.32   1 
  -1  18   7    0.46    5.61   1 
  -1  18   6    5.44    5.41   1 
   1  18  -6    7.23    6.18   1 
  -1  18   5    2.32    5.56   1 
   1  18  -5    1.14    5.25   1 
  -1  18   4   -2.19    5.02   1 
   1  18  -4   -0.58    5.23   1 
  -1  18   3    2.49    5.17   1 
   1  18  -3   -1.62    5.44   1 
  -1  18   2    8.21    5.38   1 
   1  18  -2    0.91    4.80   1 
  -1  18   1   -0.55    4.65   1 
   1  18  -1    0.36    4.68   1 
  -1  18   0    3.34    4.97   1 
   1  18   0    0.47    4.77   1 
  -1  18  -1   -1.67    4.89   1 
   1  18   1    1.34    4.83   1 
   1  18   2    3.60    4.76   1 
   1 -18   3   -0.99    3.75   1 
   1  18   3    3.82    4.95   1 
   1 -18   4   -0.69    3.88   1 
   1  18   4   -0.06    4.63   1 
   1 -18   5    7.27    4.51   1 
   1  18   5    4.59    5.21   1 
   1 -18   6    7.66    4.99   1 
   1  18   6    2.07    5.25   1 
   1 -18   7   -1.42    4.40   1 
   1  18   7   -0.33    5.39   1 
  -1  19   2    1.93    5.32   1 
   1  19  -2    1.08    5.87   1 
  -1  19   1   -0.86    5.63   1 
   1  19  -1   -1.97    5.42   1 
  -1  19   0    3.07    5.30   1 
   1  19   0    6.67    5.91   1 
   1  19   1   11.64    5.99   1 
   2   0  -2    0.27    0.43   1 
   2   0  -1    0.63    0.39   1 
   2   0   0  481.70    5.83   1 
   2   0   1    0.09    0.49   1 
   2   0   2   18.56    1.18   1 
   2   0   3   17.24    1.27   1 
   2   0   4  189.05    4.05   1 
   2   0   5    0.06    0.95   1 
   2   0   6   47.84    2.32   1 
   2   0   7    7.40    1.57   1 
   2   0   8   48.99    2.62   1 
   2   0   9    0.07    1.39   1 
   2   0  10   68.02    3.32   1 
   2   0  11    7.37    2.17   1 
   2   0  12    4.46    2.09   1 
   2   0  13    4.65    2.29   1 
   2   0  14   15.38    3.03   1 
   2   1  -5   32.01    1.37   1 
   2   1  -4  125.55    2.56   1 
   2  -1  -3   66.46    1.48   1 
   2   1  -3   71.49    1.90   1 
   2  -1  -2  125.75    2.22   1 
   2   1  -2  141.10    2.74   1 
   2  -1  -1  238.70    3.47   1 
   2   1  -1  232.45    3.68   1 
   2  -1   0   61.48    1.79   1 
   2   1   0   55.12    1.78   1 
   2  -1   1   51.44    1.73   1 
   2   1   1   54.72    1.84   1 
   2  -1   2   68.50    2.15   1 
   2   1   2   66.07    2.15   1 
   2  -1   3    6.14    1.11   1 
   2   1   3    5.92    1.10   1 
   2  -1   4   13.06    1.23   1 
   2   1   4   13.17    1.29   1 
   2  -1   5   87.43    2.97   1 
   2   1   5   77.96    2.82   1 
   2  -1   6   42.72    2.22   1 
   2   1   6   38.15    2.10   1 
   2  -1   7    0.95    1.19   1 
   2   1   7    0.51    1.15   1 
   2  -1   8   16.11    2.27   1 
   2   1   8   14.28    2.05   1 
   2  -1   9    8.79    1.95   1 
   2   1   9    7.46    1.84   1 
   2  -1  10    1.24    1.71   1 
   2   1  10   -0.76    1.55   1 
   2  -1  11   -1.16    1.58   1 
   2   1  11    1.06    1.72   1 
   2  -1  12   26.95    2.53   1 
   2   1  12   25.26    2.45   1 
   2  -1  13    3.58    2.19   1 
   2   1  13    4.15    2.16   1 
   2  -1  14    1.92    2.32   1 
   2   1  14    1.21    2.30   1 
  -2  -2  10    6.33    1.45   1 
  -2  -2   9   58.00    2.22   1 
  -2  -2   8    0.17    0.89   1 
   2   2  -6   11.49    1.37   1 
  -2   2   5    2.12    0.80   1 
   2   2  -5    0.69    1.01   1 
   2   2  -4   25.68    1.53   1 
   2  -2  -3   51.21    1.55   1 
   2   2  -3   37.24    1.88   1 
   2  -2  -2   -0.09    0.49   1 
   2   2  -2   -0.13    0.77   1 
   2  -2  -1    1.25    0.60   1 
   2   2  -1    1.25    0.77   1 
   2  -2   0   16.19    1.06   1 
   2   2   0   16.37    1.23   1 
   2  -2   1  289.26    4.58   1 
   2   2   1  311.91    5.14   1 
   2  -2   2   77.51    2.41   1 
   2   2   2   85.41    2.66   1 
   2  -2   3  172.81    3.84   1 
   2   2   3  170.82    3.83   1 
   2  -2   4   43.26    2.07   1 
   2   2   4   47.40    2.20   1 
   2  -2   5   33.34    2.01   1 
   2   2   5   30.87    1.91   1 
   2  -2   6   14.27    1.50   1 
   2   2   6   13.75    1.48   1 
   2  -2   7    1.16    1.14   1 
   2   2   7    1.65    1.28   1 
   2  -2   8    0.41    1.21   1 
   2   2   8    1.62    1.32   1 
   2  -2   9    6.43    1.93   1 
   2   2   9    6.15    1.82   1 
   2  -2  10   22.74    2.22   1 
   2   2  10   20.56    2.10   1 
   2  -2  11   19.64    2.33   1 
   2   2  11   19.00    2.70   1 
   2  -2  12    1.14    1.90   1 
   2   2  12    1.10    1.80   1 
   2  -2  13    0.08    2.06   1 
   2   2  13   -1.09    1.84   1 
   2  -2  14    9.09    2.77   1 
   2   2  14    8.85    2.65   1 
   2  -2  15    2.03    2.59   1 
  -2  -3  14   -1.39    1.68   1 
  -2  -3  13   16.85    1.97   1 
  -2  -3  12   14.00    2.15   1 
  -2  -3  11   -0.36    1.35   1 
  -2  -3  10    0.53    1.17   1 
  -2  -3   9  114.51    3.53   1 
  -2  -3   8   17.61    1.58   1 
   2   3  -7    4.49    1.73   1 
  -2   3   6   99.84    2.62   1 
   2   3  -6  104.61    3.52   1 
  -2   3   5  158.62    3.39   1 
   2   3  -5  166.66    4.31   1 
  -2   3   4    1.91    0.94   1 
   2   3  -4    1.78    1.29   1 
  -2   3   3  190.74    3.90   1 
   2   3  -3  179.79    4.34   1 
  -2   3   2   23.61    1.50   1 
   2   3  -2   18.43    1.54   1 
   2  -3  -1  348.03    5.30   1 
   2   3  -1  332.56    6.01   1 
   2  -3   0    0.53    0.75   1 
   2   3   0   -0.09    0.85   1 
   2  -3   1    0.68    0.83   1 
   2   3   1    0.91    0.92   1 
   2  -3   2    2.70    1.00   1 
   2   3   2    2.58    1.07   1 
   2  -3   3  163.61    4.01   1 
   2   3   3  193.78    4.52   1 
   2  -3   4   31.71    1.98   1 
   2   3   4   31.86    1.98   1 
   2  -3   5   11.40    1.74   1 
   2   3   5   13.84    1.92   1 
   2  -3   6   11.32    1.78   1 
   2   3   6   13.81    1.54   1 
   2  -3   7   18.14    1.82   1 
   2   3   7   17.50    1.77   1 
   2  -3   8   12.37    2.14   1 
   2   3   8   11.18    1.99   1 
   2  -3   9   44.03    2.80   1 
   2   3   9   42.50    2.65   1 
   2  -3  10    3.63    1.89   1 
   2   3  10    4.35    1.82   1 
   2  -3  11    4.88    1.99   1 
   2   3  11    3.20    1.87   1 
   2  -3  12   11.26    2.56   1 
   2   3  12    7.93    2.27   1 
   2  -3  13    2.15    2.14   1 
   2   3  13    2.09    2.09   1 
   2  -3  14    4.05    2.46   1 
   2   3  14    1.84    2.32   1 
   2  -3  15    1.54    2.54   1 
  -2  -4  14   20.47    2.85   1 
  -2  -4  13    3.56    1.94   1 
  -2  -4  12    0.05    1.63   1 
  -2  -4  11   16.75    2.39   1 
  -2  -4  10   64.86    3.17   1 
  -2   4  10   65.85    2.69   1 
  -2  -4   9    2.23    1.39   1 
  -2   4   9    3.91    1.48   1 
  -2   4   8    1.67    1.31   1 
   2   4  -8    0.03    1.95   1 
  -2   4   7   23.92    1.79   1 
   2   4  -7   21.24    2.74   1 
  -2   4   6   85.40    2.89   1 
   2   4  -6   62.94    3.33   1 
  -2   4   5   16.65    1.45   1 
   2   4  -5   16.78    1.92   1 
  -2   4   4   77.79    2.87   1 
   2   4  -4   63.34    2.99   1 
  -2   4   3    5.46    1.32   1 
   2   4  -3    4.27    1.51   1 
  -2   4   2  238.24    4.93   1 
   2   4  -2  211.14    5.36   1 
  -2   4   1   30.69    2.07   1 
   2   4  -1   33.34    2.31   1 
  -2   4   0   83.73    3.26   1 
   2   4   0   73.65    3.11   1 
   2  -4   1   22.04    1.70   1 
   2   4   1   19.93    1.82   1 
   2  -4   2  132.29    4.01   1 
   2   4   2  118.28    3.84   1 
   2  -4   3   34.11    2.14   1 
   2   4   3   35.27    2.22   1 
   2  -4   4   86.46    3.43   1 
   2   4   4   88.53    3.41   1 
   2  -4   5   20.45    1.84   1 
   2   4   5   19.61    1.84   1 
   2  -4   6    3.65    1.48   1 
   2   4   6    2.90    1.59   1 
   2  -4   7    3.01    1.48   1 
   2   4   7    1.69    1.43   1 
   2  -4   8  130.62    4.61   1 
   2   4   8  133.18    4.44   1 
   2  -4   9    0.05    1.53   1 
   2   4   9   -0.08    1.49   1 
   2  -4  10   29.65    2.60   1 
   2   4  10   27.44    2.49   1 
   2  -4  11    3.55    1.96   1 
   2   4  11    2.05    2.04   1 
   2  -4  12   -0.31    1.92   1 
   2   4  12    1.22    2.31   1 
   2  -4  13    4.26    2.31   1 
   2  -4  14   13.80    3.04   1 
   2   4  14   12.84    3.16   1 
   2  -4  15    4.03    2.63   1 
  -2  -5  14   11.41    2.56   1 
  -2  -5  12    0.97    1.84   1 
  -2   5  12    3.28    1.96   1 
  -2  -5  11    1.78    1.74   1 
  -2   5  11    4.65    1.96   1 
  -2  -5  10    2.05    1.84   1 
  -2   5  10    2.67    1.86   1 
  -2   5   9    2.57    1.69   1 
  -2   5   8   15.08    1.78   1 
   2   5  -8   22.37    3.21   1 
  -2   5   7   14.77    2.20   1 
   2   5  -7   17.23    2.83   1 
  -2   5   6  125.70    4.00   1 
   2   5  -6  132.10    5.07   1 
  -2   5   5    1.35    1.28   1 
   2   5  -5    1.37    1.67   1 
  -2   5   4    1.01    1.17   1 
   2   5  -4   -0.21    1.43   1 
  -2   5   3   -0.15    1.14   1 
   2   5  -3   -0.04    1.43   1 
  -2   5   2   16.68    1.68   1 
   2   5  -2   16.32    1.91   1 
  -2   5   1    0.91    1.14   1 
   2   5  -1    0.55    1.25   1 
  -2   5   0   16.42    2.41   1 
   2   5   0   13.54    2.29   1 
  -2   5  -1   13.33    2.18   1 
   2   5   1   14.75    1.81   1 
   2  -5   2   66.17    3.11   1 
   2   5   2   64.33    3.23   1 
   2  -5   3    2.70    1.40   1 
   2   5   3    3.82    1.70   1 
   2  -5   4    3.59    1.54   1 
   2   5   4    3.47    1.63   1 
   2  -5   5    0.09    1.27   1 
   2   5   5   -0.40    1.39   1 
   2  -5   6   15.93    2.44   1 
   2   5   6   11.41    2.20   1 
   2  -5   7   -0.67    1.49   1 
   2   5   7    0.08    1.53   1 
   2  -5   8   36.59    2.79   1 
   2   5   8   36.54    2.72   1 
   2  -5   9   16.85    2.76   1 
   2   5   9   17.65    2.69   1 
   2  -5  10   22.29    3.14   1 
   2   5  10   19.69    2.36   1 
   2  -5  11    0.66    1.96   1 
   2   5  11    2.62    2.20   1 
   2  -5  12   13.94    2.85   1 
   2   5  12   22.90    3.38   1 
   2  -5  13    0.95    2.30   1 
   2   5  13    1.12    2.57   1 
   2  -5  14    1.36    2.46   1 
   2   5  14    2.51    2.94   1 
   2  -5  15    0.96    2.66   1 
  -2  -6  14    3.87    2.39   1 
  -2  -6  13    0.92    2.15   1 
  -2   6  13    3.81    2.48   1 
  -2  -6  12    7.36    2.49   1 
  -2   6  12    7.84    2.44   1 
  -2  -6  11   -0.18    1.97   1 
  -2   6  11    1.21    2.18   1 
  -2  -6  10   -1.94    1.79   1 
  -2   6  10    2.26    1.98   1 
  -2   6   9   23.20    2.35   1 
   2   6  -9   33.52    4.39   1 
  -2   6   8   23.58    2.29   1 
   2   6  -8   27.27    3.91   1 
  -2   6   7   14.98    2.55   1 
   2   6  -7   16.58    3.35   1 
  -2   6   6    0.58    1.48   1 
   2   6  -6    0.72    1.93   1 
  -2   6   5   16.74    2.42   1 
   2   6  -5   17.41    3.04   1 
  -2   6   4   15.96    1.87   1 
   2   6  -4   23.54    3.18   1 
  -2   6   3    8.27    2.03   1 
   2   6  -3    7.67    2.08   1 
  -2   6   2   11.00    2.06   1 
   2   6  -2   13.57    2.55   1 
  -2   6   1   19.63    2.61   1 
   2   6  -1   21.68    2.91   1 
  -2   6   0    4.19    1.75   1 
   2   6   0    5.18    1.88   1 
  -2   6  -1   -0.41    1.36   1 
   2   6   1   -0.44    1.41   1 
   2   6   2    3.04    1.80   1 
   2  -6   3   21.37    2.12   1 
   2   6   3   18.70    2.09   1 
   2  -6   4    3.44    1.72   1 
   2   6   4    2.35    1.64   1 
   2  -6   5   20.17    2.25   1 
   2   6   5   19.15    2.17   1 
   2  -6   6   31.29    2.66   1 
   2   6   6   31.77    2.66   1 
   2  -6   7   37.86    2.98   1 
   2   6   7   42.07    3.14   1 
   2  -6   8   19.12    2.36   1 
   2   6   8   23.32    2.58   1 
   2  -6   9    0.63    1.83   1 
   2   6   9   -0.05    1.98   1 
   2  -6  10   47.72    3.57   1 
   2   6  10   54.43    3.74   1 
   2  -6  11   26.58    2.87   1 
   2   6  11   35.40    3.27   1 
   2  -6  12   -0.37    2.07   1 
   2   6  12    2.35    2.51   1 
   2  -6  13    1.85    2.51   1 
   2   6  13    2.67    2.84   1 
   2  -6  14    9.02    3.01   1 
   2   6  14   13.28    3.39   1 
   2  -6  15    4.76    3.02   1 
  -2  -7  14    0.93    2.55   1 
  -2  -7  13   14.51    3.38   1 
  -2   7  13   19.29    3.47   1 
  -2  -7  12   26.66    4.07   1 
  -2  -7  11    1.35    2.38   1 
  -2   7  11    5.30    2.53   1 
  -2  -7  10   13.86    3.07   1 
  -2   7  10   18.51    3.16   1 
  -2   7   9   51.42    3.45   1 
   2   7  -9   47.40    4.28   1 
  -2   7   8    1.81    2.00   1 
   2   7  -8   -0.39    2.35   1 
  -2   7   7    6.66    2.16   1 
   2   7  -7    3.20    2.61   1 
  -2   7   6    5.51    1.96   1 
   2   7  -6    3.76    2.37   1 
  -2   7   5    1.39    1.64   1 
   2   7  -5    0.63    2.04   1 
  -2   7   4    0.57    1.57   1 
   2   7  -4   -0.51    1.80   1 
  -2   7   3   21.05    3.01   1 
   2   7  -3   22.24    3.25   1 
  -2   7   2    9.09    2.20   1 
   2   7  -2   10.84    2.61   1 
  -2   7   1   21.85    2.40   1 
   2   7  -1   21.32    2.40   1 
  -2   7   0    4.97    2.02   1 
   2   7   0    4.82    2.25   1 
  -2   7  -1   40.99    3.27   1 
   2   7   1   45.74    3.22   1 
  -2   7  -2   23.69    3.30   1 
   2   7   2   21.02    2.45   1 
   2  -7   3   25.55    2.50   1 
   2   7   3   24.09    2.59   1 
   2  -7   4    2.64    1.81   1 
   2   7   4    0.92    1.78   1 
   2  -7   5    5.72    2.08   1 
   2   7   5    6.61    2.35   1 
   2  -7   6   -0.77    1.68   1 
   2   7   6    0.02    1.67   1 
   2  -7   7   18.30    3.12   1 
   2   7   7   18.09    3.04   1 
   2  -7   8    7.46    2.55   1 
   2   7   8    7.50    2.55   1 
   2  -7   9   17.94    3.37   1 
   2   7   9   18.41    3.33   1 
   2  -7  10   -0.57    2.14   1 
   2   7  10    0.33    2.38   1 
   2  -7  11    0.44    2.30   1 
   2   7  11    2.06    2.58   1 
   2  -7  12    8.75    2.96   1 
   2   7  12    7.53    2.99   1 
   2  -7  13    0.15    2.56   1 
   2   7  13    2.34    3.13   1 
   2  -7  14    2.43    2.94   1 
   2  -7  15    1.39    3.01   1 
  -2  -8  15    7.73    3.47   1 
  -2  -8  14   21.75    4.14   1 
  -2  -8  13   25.74    4.16   1 
  -2  -8  12    8.72    2.99   1 
  -2   8  12    7.52    3.20   1 
  -2  -8  11    6.66    2.89   1 
  -2   8  11   14.57    3.31   1 
  -2   8  10   20.09    3.44   1 
   2   8 -10   15.10    3.91   1 
  -2   8   9    9.14    2.76   1 
   2   8  -9    7.41    3.59   1 
  -2   8   8   14.02    3.09   1 
   2   8  -8    9.37    3.40   1 
  -2   8   7   32.24    2.97   1 
   2   8  -7   31.58    3.77   1 
  -2   8   6    3.61    2.05   1 
   2   8  -6   -1.18    2.20   1 
  -2   8   5    2.66    1.98   1 
   2   8  -5    0.14    2.29   1 
  -2   8   4   -1.22    1.69   1 
   2   8  -4   -0.93    2.03   1 
  -2   8   3    5.02    2.14   1 
   2   8  -3    4.75    2.50   1 
  -2   8   2    2.79    1.86   1 
   2   8  -2    3.87    2.17   1 
  -2   8   1    1.77    1.88   1 
   2   8  -1    0.47    1.82   1 
  -2   8   0   38.38    3.10   1 
   2   8   0   41.75    3.31   1 
  -2   8  -1   27.55    2.90   1 
   2   8   1   26.41    2.84   1 
  -2   8  -2    9.63    2.64   1 
   2   8   2   12.12    2.78   1 
  -2   8  -3   22.78    2.79   1 
   2   8   3   26.18    2.78   1 
   2  -8   4   18.49    3.13   1 
   2   8   4   18.22    3.16   1 
   2  -8   5    2.02    2.05   1 
   2   8   5    2.97    2.16   1 
   2  -8   6    1.02    1.86   1 
   2   8   6    0.53    1.93   1 
   2  -8   7   -0.14    1.95   1 
   2   8   7   -1.12    2.01   1 
   2  -8   8   40.84    3.69   1 
   2   8   8   40.19    3.65   1 
   2  -8   9    3.38    2.46   1 
   2   8   9    6.36    2.77   1 
   2  -8  10    1.48    2.43   1 
   2   8  10    3.28    2.77   1 
   2  -8  11    1.29    2.50   1 
   2   8  11    3.48    2.97   1 
   2  -8  12    0.53    2.72   1 
   2   8  12    0.97    2.97   1 
   2  -8  13    8.02    3.44   1 
   2   8  13    8.61    3.54   1 
   2  -8  14    0.45    2.79   1 
   2  -8  15   13.69    4.05   1 
  -2  -9  15   -1.21    3.44   1 
  -2  -9  14   -0.33    3.50   1 
  -2  -9  13    0.85    3.28   1 
  -2  -9  12    8.61    3.45   1 
  -2   9  12   10.81    3.68   1 
  -2  -9  11    3.07    2.79   1 
  -2   9  11    3.18    3.04   1 
  -2   9  10    0.17    2.53   1 
   2   9 -10    0.01    3.30   1 
  -2   9   9    7.24    3.04   1 
   2   9  -9    2.93    3.56   1 
  -2   9   8   67.08    4.30   1 
   2   9  -8   78.34    5.62   1 
   2   9  -7    3.22    3.04   1 
  -2   9   6   29.76    3.08   1 
   2   9  -6   34.31    4.91   1 
  -2   9   5    5.97    2.58   1 
   2   9  -5    1.25    2.51   1 
  -2   9   4    2.05    2.12   1 
   2   9  -4    0.63    2.37   1 
  -2   9   3   -0.01    1.84   1 
   2   9  -3   -0.80    2.06   1 
  -2   9   2   32.45    3.07   1 
   2   9  -2   34.53    3.37   1 
  -2   9   1   23.32    3.58   1 
   2   9  -1   23.52    3.74   1 
  -2   9   0    4.82    2.26   1 
   2   9   0    9.99    2.88   1 
  -2   9  -1    0.35    2.14   1 
   2   9   1    1.58    2.21   1 
  -2   9  -2   33.86    3.41   1 
   2   9   2   33.71    3.31   1 
  -2   9  -3    3.93    2.52   1 
   2   9   3    6.14    2.62   1 
   2  -9   4    2.23    1.96   1 
   2   9   4    1.49    2.10   1 
   2  -9   5   12.15    2.82   1 
   2   9   5    9.48    2.82   1 
   2  -9   6   10.63    3.05   1 
   2   9   6   11.57    3.00   1 
   2  -9   7   -0.01    2.11   1 
   2   9   7   -0.31    2.30   1 
   2  -9   8    7.79    2.81   1 
   2   9   8    7.02    3.04   1 
   2  -9   9   27.13    4.50   1 
   2   9   9   27.95    4.27   1 
   2  -9  10   48.16    4.23   1 
   2   9  10   42.78    3.96   1 
   2  -9  11    2.23    2.93   1 
   2   9  11    1.75    2.88   1 
   2  -9  12   11.02    3.53   1 
   2   9  12    9.31    3.55   1 
   2  -9  13    1.25    2.97   1 
   2   9  13    1.82    3.36   1 
   2  -9  14    4.22    3.31   1 
   2  -9  15    0.70    3.33   1 
   2  -9  16    2.23    3.46   1 
  -2 -10  15    8.94    4.19   1 
  -2 -10  14   11.43    4.34   1 
  -2 -10  13    1.90    3.43   1 
  -2 -10  12    1.94    3.27   1 
  -2  10  12    1.42    3.70   1 
  -2 -10  11    2.57    2.97   1 
  -2  10  11    4.81    3.57   1 
  -2  10  10   11.89    3.75   1 
   2  10 -10    4.44    4.02   1 
  -2  10   9   -0.32    2.69   1 
   2  10  -9   -0.48    3.38   1 
  -2  10   8    5.88    3.04   1 
   2  10  -8   -0.03    3.17   1 
  -2  10   7    0.10    2.58   1 
   2  10  -7    2.62    2.99   1 
  -2  10   6   37.11    4.88   1 
   2  10  -6   37.94    5.65   1 
  -2  10   5    3.04    2.61   1 
   2  10  -5    3.46    2.95   1 
  -2  10   4    1.95    2.38   1 
   2  10  -4    4.69    3.09   1 
  -2  10   3    3.84    2.31   1 
   2  10  -3    4.39    3.04   1 
  -2  10   2    1.27    2.22   1 
   2  10  -2   -1.45    2.33   1 
  -2  10   1   10.04    3.05   1 
   2  10  -1    6.60    2.80   1 
  -2  10   0   35.78    3.58   1 
   2  10   0   36.93    3.75   1 
  -2  10  -1    3.80    2.61   1 
   2  10   1    2.41    2.19   1 
  -2  10  -2    7.77    3.03   1 
   2  10   2    5.15    2.66   1 
  -2  10  -3   63.64    4.93   1 
   2  10   3   64.73    4.76   1 
   2 -10   4   26.48    3.15   1 
   2  10   4   29.96    4.22   1 
   2 -10   5    1.21    2.23   1 
   2  10   5    2.18    2.58   1 
   2 -10   6    1.00    2.42   1 
   2  10   6   -1.32    2.37   1 
   2 -10   7   40.50    3.89   1 
   2  10   7   34.49    3.81   1 
   2 -10   8   36.96    3.95   1 
   2  10   8   35.03    3.87   1 
   2 -10   9    1.96    2.92   1 
   2  10   9    2.73    2.92   1 
   2 -10  10   31.54    5.02   1 
   2  10  10   32.37    5.20   1 
   2 -10  11   13.61    4.17   1 
   2  10  11   13.88    4.26   1 
   2 -10  12    8.13    3.84   1 
   2  10  12    7.09    3.94   1 
   2 -10  13    1.91    3.62   1 
   2  10  13    1.33    3.67   1 
   2 -10  14   -0.62    3.51   1 
   2 -10  15    4.14    3.84   1 
   2 -10  16    1.51    4.13   1 
  -2 -11  15   10.54    4.75   1 
  -2 -11  14   -0.46    3.68   1 
  -2 -11  13    1.98    3.77   1 
  -2 -11  12    0.83    3.50   1 
  -2  11  12    3.83    3.90   1 
  -2 -11  11   21.80    4.74   1 
  -2  11  11   15.99    4.44   1 
  -2  11  10    8.29    3.87   1 
   2  11 -10    7.65    4.41   1 
  -2  11   9   32.84    5.33   1 
   2  11  -9   30.04    5.88   1 
  -2  11   8    3.13    3.30   1 
   2  11  -8    4.80    3.72   1 
  -2  11   7    0.58    2.86   1 
   2  11  -7   -1.82    3.13   1 
  -2  11   6    1.96    2.91   1 
   2  11  -6    4.23    3.73   1 
  -2  11   5    0.60    2.44   1 
   2  11  -5   -3.07    2.63   1 
  -2  11   4    1.31    2.41   1 
   2  11  -4    0.24    2.93   1 
  -2  11   3   -0.60    2.22   1 
   2  11  -3    0.20    2.84   1 
  -2  11   2   14.21    3.51   1 
   2  11  -2   13.57    3.66   1 
  -2  11   1   18.19    3.71   1 
   2  11  -1   20.10    4.11   1 
  -2  11   0    4.25    2.87   1 
   2  11   0    4.15    2.87   1 
  -2  11  -1   67.97    5.27   1 
   2  11   1   73.22    5.13   1 
  -2  11  -2    4.45    2.90   1 
   2  11   2    5.88    3.09   1 
  -2  11  -3    6.12    3.35   1 
   2  11   3    3.52    2.55   1 
   2 -11   4    3.91    2.44   1 
   2  11   4    3.68    2.87   1 
   2 -11   5   18.94    3.90   1 
   2  11   5   19.48    4.07   1 
   2 -11   6    3.48    2.88   1 
   2  11   6    2.18    2.90   1 
   2 -11   7    0.28    2.61   1 
   2  11   7    0.05    2.85   1 
   2 -11   8   25.89    4.99   1 
   2  11   8   20.82    4.56   1 
   2 -11   9   37.72    4.33   1 
   2  11   9   34.07    4.16   1 
   2 -11  10   25.71    5.22   1 
   2  11  10   24.37    5.08   1 
   2 -11  11   -1.25    3.29   1 
   2  11  11   -2.98    3.71   1 
   2 -11  12   -1.00    3.48   1 
   2  11  12    3.87    3.95   1 
   2 -11  13   39.49    4.88   1 
   2  11  13   52.50    6.94   1 
   2 -11  14    0.35    4.04   1 
   2 -11  15    0.18    4.10   1 
   2 -11  16    0.77    4.45   1 
  -2 -12  15   11.13    5.27   1 
  -2 -12  14    1.68    4.16   1 
  -2 -12  13    1.71    4.01   1 
  -2 -12  12   -1.75    3.83   1 
  -2  12  12   -1.57    3.88   1 
  -2 -12  11    2.18    3.63   1 
  -2  12  11    0.60    3.62   1 
  -2  12  10    6.75    3.91   1 
   2  12 -10   10.09    5.20   1 
  -2  12   9    1.05    3.35   1 
   2  12  -9    1.56    4.36   1 
  -2  12   8   -0.05    3.07   1 
   2  12  -8   -0.61    3.93   1 
  -2  12   7    4.15    3.29   1 
   2  12  -7    4.28    3.82   1 
  -2  12   6    0.53    2.80   1 
   2  12  -6    0.47    3.53   1 
  -2  12   5    5.09    3.05   1 
   2  12  -5    5.28    3.84   1 
  -2  12   4    0.11    2.60   1 
   2  12  -4    2.52    3.31   1 
  -2  12   3   -1.82    2.55   1 
   2  12  -3   -1.17    3.02   1 
  -2  12   2   -1.93    2.57   1 
   2  12  -2   -2.76    2.65   1 
  -2  12   1   15.27    3.81   1 
   2  12  -1   21.21    4.58   1 
  -2  12   0    7.14    3.40   1 
   2  12   0    6.34    3.24   1 
  -2  12  -1   21.30    4.70   1 
   2  12   1   22.13    4.48   1 
  -2  12  -2    6.23    3.23   1 
   2  12   2    1.23    2.89   1 
  -2  12  -3   45.68    4.77   1 
   2  12   3   40.65    4.30   1 
   2 -12   4    0.24    2.32   1 
   2  12   4    0.12    2.91   1 
   2 -12   5    1.41    2.64   1 
   2  12   5    2.33    3.00   1 
   2 -12   6   12.02    3.78   1 
   2  12   6    5.60    3.19   1 
   2 -12   7   38.91    5.56   1 
   2  12   7   33.60    5.22   1 
   2 -12   8    4.17    3.63   1 
   2  12   8    1.32    3.23   1 
   2 -12   9    3.64    3.08   1 
   2  12   9    2.39    3.38   1 
   2 -12  10    1.74    3.59   1 
   2  12  10    1.18    3.45   1 
   2 -12  11   29.50    5.65   1 
   2  12  11   22.89    5.21   1 
   2 -12  12    0.07    4.06   1 
   2  12  12   -1.07    3.82   1 
   2 -12  13    1.58    4.29   1 
   2  12  13   -4.13    4.32   1 
   2 -12  14    0.91    4.49   1 
   2 -12  15   16.23    5.36   1 
   2 -12  16   -1.86    4.58   1 
  -2 -13  15    4.38    5.50   1 
  -2 -13  14    2.64    4.74   1 
  -2 -13  13    5.60    4.51   1 
  -2 -13  12    8.00    4.77   1 
  -2  13  12    5.73    4.98   1 
  -2 -13  11    0.32    3.75   1 
  -2  13  11    2.90    4.38   1 
  -2  13  10   -2.45    3.70   1 
   2  13 -10    0.52    4.69   1 
  -2  13   9    3.61    3.77   1 
   2  13  -9    1.22    4.25   1 
  -2  13   8   15.49    4.62   1 
   2  13  -8   18.03    5.45   1 
  -2  13   7   15.04    4.36   1 
   2  13  -7   15.53    5.02   1 
  -2  13   6   10.85    3.98   1 
   2  13  -6    6.39    4.12   1 
  -2  13   5    1.08    3.15   1 
   2  13  -5   -1.68    3.54   1 
  -2  13   4    2.92    3.31   1 
   2  13  -4    4.21    3.81   1 
  -2  13   3    6.31    3.17   1 
   2  13  -3    3.29    3.52   1 
  -2  13   2    3.58    3.11   1 
   2  13  -2    8.07    3.87   1 
  -2  13   1    0.34    2.90   1 
   2  13  -1    1.85    3.25   1 
  -2  13   0    6.33    3.71   1 
   2  13   0    8.00    3.66   1 
  -2  13  -1   38.50    4.56   1 
   2  13   1   37.05    4.56   1 
  -2  13  -2   12.85    4.10   1 
   2  13   2   10.69    3.92   1 
  -2  13  -3   22.84    5.09   1 
   2  13   3   17.71    4.35   1 
   2 -13   4    2.12    2.73   1 
   2  13   4    3.61    3.44   1 
   2 -13   5   14.05    3.73   1 
   2  13   5   13.91    4.28   1 
   2 -13   6   13.74    4.30   1 
   2  13   6   11.82    4.18   1 
   2 -13   7    4.32    3.36   1 
   2  13   7    2.13    3.36   1 
   2 -13   8    3.30    3.87   1 
   2  13   8    2.70    3.85   1 
   2 -13   9   37.51    5.95   1 
   2  13   9   31.91    5.63   1 
   2 -13  10    5.38    4.18   1 
   2  13  10    5.03    4.33   1 
   2 -13  11   -0.53    4.06   1 
   2  13  11    0.45    4.31   1 
   2 -13  12    4.47    4.71   1 
   2  13  12   -0.75    4.40   1 
   2 -13  13    2.44    4.63   1 
   2  13  13   -1.54    4.91   1 
   2 -13  14    2.92    5.00   1 
   2 -13  15    0.99    5.05   1 
   2 -13  16    0.61    5.38   1 
  -2 -14  15    0.56    5.59   1 
  -2 -14  14   15.46    5.87   1 
  -2 -14  13    1.93    4.70   1 
  -2 -14  12   -2.38    4.45   1 
  -2  14  12    1.46    4.85   1 
  -2 -14  11    0.32    3.83   1 
  -2  14  11   -1.61    4.80   1 
  -2  14  10   16.90    5.59   1 
  -2  14   9    0.15    4.42   1 
   2  14  -9   -0.12    4.47   1 
  -2  14   8   -2.50    3.94   1 
   2  14  -8   -0.24    4.83   1 
  -2  14   7   -0.96    3.59   1 
   2  14  -7   -0.42    4.15   1 
  -2  14   6    3.77    3.50   1 
   2  14  -6    2.58    4.32   1 
  -2  14   5    0.55    3.24   1 
   2  14  -5   -1.50    3.59   1 
  -2  14   4   16.64    4.56   1 
   2  14  -4   18.77    5.39   1 
  -2  14   3    0.47    3.37   1 
   2  14  -3    0.54    3.53   1 
  -2  14   2    3.18    3.54   1 
   2  14  -2    5.97    3.67   1 
  -2  14   1   -0.25    3.40   1 
   2  14  -1   -0.14    3.37   1 
  -2  14   0   21.42    5.11   1 
   2  14   0   16.44    4.85   1 
  -2  14  -1    1.62    3.27   1 
   2  14   1    0.71    3.43   1 
  -2  14  -2   -1.89    3.34   1 
   2  14   2   -1.02    3.20   1 
   2 -14   3    4.53    3.37   1 
   2  14   3    3.20    3.74   1 
   2 -14   4    4.76    3.34   1 
   2  14   4    6.13    4.08   1 
   2 -14   5    2.97    3.23   1 
   2  14   5    0.31    3.43   1 
   2 -14   6   -0.23    3.29   1 
   2  14   6    0.41    3.49   1 
   2 -14   7    6.27    3.69   1 
   2  14   7    6.56    4.04   1 
   2 -14   8   34.40    6.16   1 
   2  14   8   23.51    5.53   1 
   2 -14   9   -1.64    3.29   1 
   2  14   9    1.30    4.25   1 
   2 -14  10    7.94    4.78   1 
   2  14  10    8.81    4.86   1 
   2 -14  11    1.40    4.65   1 
   2  14  11    2.34    4.66   1 
   2 -14  12    5.90    5.05   1 
   2  14  12   13.77    6.11   1 
   2 -14  13    0.55    5.15   1 
   2 -14  14   -3.41    5.30   1 
  -2 -15  14   -0.50    5.27   1 
  -2 -15  13    8.85    5.32   1 
  -2 -15  12   12.10    5.92   1 
  -2 -15  11    0.66    3.97   1 
  -2  15  11    3.75    5.44   1 
  -2 -15  10    0.68    3.84   1 
  -2  15  10   -2.24    4.67   1 
  -2  15   9   16.36    5.47   1 
   2  15  -9   16.40    6.37   1 
  -2  15   8    8.61    4.70   1 
   2  15  -8   14.14    6.25   1 
  -2  15   7   11.31    4.58   1 
   2  15  -7   10.78    5.45   1 
  -2  15   6   -2.14    3.56   1 
   2  15  -6    0.63    4.58   1 
  -2  15   5   -0.75    3.64   1 
   2  15  -5    0.49    4.02   1 
  -2  15   4    1.74    3.93   1 
   2  15  -4    0.58    3.99   1 
  -2  15   3   -2.47    3.53   1 
   2  15  -3    0.22    4.25   1 
  -2  15   2    0.22    3.86   1 
   2  15  -2   -1.08    3.94   1 
  -2  15   1    3.39    4.32   1 
   2  15  -1    5.21    4.15   1 
  -2  15   0   -0.61    3.48   1 
   2  15   0   -0.11    3.61   1 
  -2  15  -1    7.98    4.57   1 
   2  15   1    9.51    4.58   1 
  -2  15  -2    9.88    4.57   1 
   2  15   2   12.60    4.97   1 
   2 -15   3   -3.34    2.60   1 
   2  15   3    0.28    3.90   1 
   2 -15   4    0.09    3.29   1 
   2  15   4   -0.60    3.73   1 
   2 -15   5    6.70    3.84   1 
   2  15   5    4.96    4.01   1 
   2 -15   6    2.47    3.78   1 
   2  15   6    3.81    4.47   1 
   2 -15   7   -0.54    3.34   1 
   2  15   7   -1.19    4.34   1 
   2 -15   8    5.75    4.53   1 
   2  15   8    2.20    4.46   1 
   2 -15   9   25.85    5.64   1 
   2  15   9   18.81    6.22   1 
   2 -15  10    4.29    4.75   1 
   2  15  10    3.73    5.07   1 
   2 -15  11   -0.63    4.56   1 
   2  15  11   -1.87    4.97   1 
   2 -15  12   -0.16    5.01   1 
   2  15  12    3.65    5.56   1 
   2 -15  13    3.17    5.72   1 
  -2 -16  12    1.14    5.19   1 
  -2 -16  11    2.58    4.76   1 
  -2  16  11    1.80    6.27   1 
  -2 -16  10    1.19    4.46   1 
  -2  16  10    1.92    5.51   1 
  -2  16   9   -6.28    5.27   1 
   2  16  -9   -3.07    5.43   1 
  -2  16   8    0.67    4.75   1 
   2  16  -8    3.46    5.34   1 
  -2  16   7    7.11    4.97   1 
   2  16  -7    9.86    6.15   1 
  -2  16   6    5.58    4.99   1 
   2  16  -6    0.54    5.01   1 
  -2  16   5    9.40    4.73   1 
   2  16  -5    5.24    4.87   1 
  -2  16   4   -2.04    4.44   1 
   2  16  -4   -0.09    4.33   1 
  -2  16   3    1.10    4.24   1 
   2  16  -3    0.24    4.00   1 
  -2  16   2   -2.42    3.85   1 
   2  16  -2    2.02    4.29   1 
  -2  16   1    5.28    3.98   1 
   2  16  -1    1.99    4.25   1 
  -2  16   0    5.89    4.38   1 
   2  16   0    1.77    4.07   1 
  -2  16  -1    4.24    4.33   1 
   2  16   1   12.67    4.90   1 
   2 -16   2    2.36    3.29   1 
   2  16   2    1.68    3.96   1 
   2 -16   3   31.88    5.86   1 
   2  16   3   27.47    6.19   1 
   2 -16   4   -1.51    3.37   1 
   2  16   4    0.60    4.21   1 
   2 -16   5    1.64    4.01   1 
   2  16   5    1.29    4.41   1 
   2 -16   6    2.70    4.26   1 
   2  16   6    0.42    4.58   1 
   2 -16   7   29.98    6.10   1 
   2  16   7   18.08    6.18   1 
   2 -16   8    2.31    4.51   1 
   2  16   8    1.23    5.25   1 
   2 -16   9    0.12    4.27   1 
   2  16   9   -0.68    5.04   1 
   2 -16  10    8.47    5.47   1 
   2  16  10    5.60    5.90   1 
   2 -16  11   22.06    6.80   1 
   2  16  11   17.88    7.07   1 
  -2 -17  10   -0.26    4.24   1 
  -2  17  10    2.04    6.45   1 
  -2 -17   9   -1.14    4.39   1 
  -2  17   9   -0.89    5.77   1 
  -2  17   8    0.47    5.37   1 
   2  17  -8    2.79    6.33   1 
  -2  17   7   -5.33    4.71   1 
   2  17  -7   -1.58    5.40   1 
  -2  17   6    7.97    5.62   1 
   2  17  -6    3.44    5.97   1 
  -2  17   5    4.99    5.55   1 
   2  17  -5    1.06    5.05   1 
  -2  17   4   -1.52    4.33   1 
   2  17  -4   -1.16    4.61   1 
  -2  17   3    9.98    5.25   1 
   2  17  -3    9.04    5.37   1 
  -2  17   2    2.71    4.50   1 
   2  17  -2    5.30    4.67   1 
  -2  17   1    1.97    4.87   1 
   2  17  -1   -2.64    4.43   1 
  -2  17   0   -0.11    4.31   1 
   2  17   0   -0.18    4.65   1 
   2 -17   1   14.51    4.55   1 
   2  17   1    9.11    5.24   1 
   2 -17   2   -1.14    3.34   1 
   2  17   2    0.49    4.56   1 
   2 -17   3   -0.49    3.38   1 
   2  17   3   -2.45    4.26   1 
   2 -17   4   -1.14    3.78   1 
   2  17   4    0.20    4.52   1 
   2 -17   5   13.71    5.01   1 
   2  17   5   12.75    5.30   1 
   2 -17   6    0.21    4.03   1 
   2  17   6   -2.32    5.33   1 
   2 -17   7   -2.06    3.90   1 
   2  17   7    2.26    5.18   1 
   2 -17   8   -1.39    4.61   1 
   2  17   8   -1.70    5.41   1 
   2 -17   9   15.06    5.74   1 
   2  17   9    6.30    6.01   1 
  -2  18   7    0.62    5.27   1 
   2  18  -7   -0.83    6.09   1 
  -2  18   6    1.57    5.11   1 
   2  18  -6   -1.75    6.12   1 
  -2  18   5    0.98    4.88   1 
   2  18  -5   -4.62    5.20   1 
  -2  18   4    3.01    5.10   1 
   2  18  -4    3.12    5.82   1 
  -2  18   3    0.48    4.94   1 
   2  18  -3    1.33    4.92   1 
  -2  18   2    7.36    5.08   1 
   2  18  -2    3.77    5.24   1 
   2  18  -1   13.81    5.85   1 
   2 -18   0    9.15    4.33   1 
   2  18   0    1.68    4.59   1 
   2 -18   1    0.23    3.80   1 
   2  18   1    0.93    4.66   1 
   2 -18   2   -0.20    3.61   1 
   2  18   2    0.91    5.24   1 
   2 -18   3    4.05    4.45   1 
   2  18   3    3.27    5.25   1 
   2 -18   4    7.12    4.74   1 
   2  18   4   -1.33    4.78   1 
   2 -18   5    2.05    4.34   1 
   2  18   5   -0.58    4.85   1 
   2 -18   6   -0.35    3.98   1 
   2  18   6   -1.67    5.11   1 
   2 -19  -1    0.00    4.11   1 
   2  19  -1    1.14    5.61   1 
   2 -19   0   -1.04    3.96   1 
   2  19   0    1.68    5.69   1 
   3   0  -4  168.54    2.93   1 
   3   0  -3    6.91    0.77   1 
   3   0  -2  247.12    3.93   1 
   3   0  -1    0.88    0.57   1 
   3   0   0   77.89    2.36   1 
   3   0   1    0.07    0.63   1 
   3   0   2   58.71    2.30   1 
   3   0   3    0.76    0.94   1 
   3   0   4  542.66    8.01   1 
   3   0   5   13.64    1.52   1 
   3   0   6    3.96    1.42   1 
   3   0   7    1.85    1.29   1 
   3   0   8  151.10    4.82   1 
   3   0   9   14.25    2.37   1 
   3   0  10    3.89    1.95   1 
   3   0  11   21.84    2.64   1 
   3   0  12   51.46    3.50   1 
   3   0  13    9.38    2.67   1 
   3   0  14   33.26    3.16   1 
   3   1  -6   16.09    1.18   1 
   3   1  -5    0.53    0.82   1 
   3  -1  -4    6.06    0.85   1 
   3   1  -4    7.04    1.11   1 
   3  -1  -3   81.12    2.00   1 
   3   1  -3   80.82    2.29   1 
   3  -1  -2    6.56    0.75   1 
   3   1  -2    8.22    1.14   1 
   3  -1  -1   37.32    1.55   1 
   3   1  -1   34.80    1.61   1 
   3  -1   0    0.76    0.63   1 
   3   1   0    1.21    0.80   1 
   3  -1   1   18.64    1.32   1 
   3   1   1   17.44    1.27   1 
   3  -1   2    8.28    1.03   1 
   3   1   2   10.10    1.48   1 
   3  -1   3  173.57    4.16   1 
   3   1   3  173.04    4.20   1 
   3  -1   4  101.49    3.32   1 
   3   1   4   97.17    3.33   1 
   3  -1   5    5.18    1.40   1 
   3   1   5    5.45    1.48   1 
   3  -1   6   14.23    1.68   1 
   3   1   6   12.89    1.61   1 
   3  -1   7    1.79    1.36   1 
   3   1   7    1.99    1.28   1 
   3  -1   8    0.80    1.47   1 
   3   1   8    1.70    1.58   1 
   3  -1   9    0.53    1.62   1 
   3   1   9    1.84    1.70   1 
   3  -1  10   57.19    3.37   1 
   3   1  10   51.01    3.14   1 
   3  -1  11   20.55    2.49   1 
   3   1  11   19.71    2.45   1 
   3  -1  12    1.29    2.06   1 
   3   1  12   -0.10    1.96   1 
   3  -1  13    2.94    2.23   1 
   3   1  13    3.73    2.24   1 
   3  -1  14   22.04    3.59   1 
   3   1  14   16.26    3.33   1 
   3  -1  15    3.90    2.89   1 
  -3  -2   9  209.44    4.04   1 
   3   2  -8    7.18    1.69   1 
   3   2  -7   16.89    1.66   1 
   3   2  -6   18.99    1.64   1 
   3  -2  -5  111.38    2.32   1 
   3   2  -5  117.62    3.34   1 
   3  -2  -4   11.67    0.92   1 
   3  -2  -3    4.62    0.91   1 
   3   2  -3    4.09    1.16   1 
   3  -2  -2  150.28    3.13   1 
   3   2  -2  140.73    3.49   1 
   3  -2  -1  142.36    3.16   1 
   3   2  -1  136.64    3.50   1 
   3  -2   0  112.65    2.93   1 
   3   2   0  120.37    3.34   1 
   3  -2   1  633.42    7.89   1 
   3   2   1  670.18    8.67   1 
   3  -2   2    7.42    1.29   1 
   3   2   2    7.23    1.37   1 
   3  -2   3   65.89    2.64   1 
   3   2   3   70.35    2.84   1 
   3  -2   4    6.69    1.49   1 
   3   2   4    8.21    1.63   1 
   3  -2   5    1.69    1.17   1 
   3   2   5    1.66    1.14   1 
   3  -2   6   -0.42    1.14   1 
   3   2   6    0.13    1.14   1 
   3  -2   7   -0.45    1.22   1 
   3   2   7    0.51    1.28   1 
   3  -2   8    2.62    1.56   1 
   3   2   8    3.18    1.56   1 
   3  -2   9   76.84    3.67   1 
   3   2   9   77.10    3.70   1 
   3  -2  10   25.15    2.54   1 
   3   2  10   23.65    2.43   1 
   3  -2  11    9.21    2.45   1 
   3   2  11   14.45    2.69   1 
   3  -2  12   21.26    2.56   1 
   3   2  12   22.92    3.24   1 
   3  -2  13   25.63    2.86   1 
   3   2  13   23.69    2.72   1 
   3  -2  14    4.71    2.64   1 
   3   2  14    2.59    2.33   1 
   3  -2  15    2.89    2.76   1 
  -3  -3  12    0.00    1.31   1 
  -3  -3  11   27.50    1.99   1 
  -3  -3  10    8.14    1.74   1 
   3   3  -9    4.87    2.04   1 
   3   3  -8    0.81    1.59   1 
   3  -3  -7  257.74    4.08   1 
   3   3  -7  291.34    6.13   1 
   3  -3  -6   12.30    1.11   1 
   3   3  -6   10.69    1.92   1 
   3  -3  -5   56.00    1.95   1 
   3   3  -5   55.64    2.65   1 
   3  -3  -4   94.29    2.60   1 
   3   3  -4   81.85    3.30   1 
   3  -3  -3  187.56    3.72   1 
   3   3  -3  194.87    4.83   1 
   3  -3  -2  431.74    6.18   1 
   3   3  -2  402.84    6.85   1 
   3  -3  -1   71.05    2.50   1 
   3   3  -1   58.28    2.58   1 
   3  -3   0   51.81    2.19   1 
   3   3   0   48.09    2.41   1 
   3  -3   1  272.10    5.29   1 
   3   3   1  278.29    5.72   1 
   3  -3   2   47.14    2.29   1 
   3   3   2   49.06    2.49   1 
   3  -3   3    4.72    1.35   1 
   3   3   3    4.32    1.37   1 
   3  -3   4    0.01    1.05   1 
   3   3   4   -0.24    1.07   1 
   3  -3   5   27.86    2.06   1 
   3   3   5   28.15    2.09   1 
   3  -3   6    3.21    1.43   1 
   3   3   6    2.21    1.36   1 
   3  -3   7    0.98    1.35   1 
   3   3   7    0.75    1.34   1 
   3  -3   8   50.56    3.06   1 
   3   3   8   44.36    2.84   1 
   3  -3   9   21.13    2.83   1 
   3   3   9   18.62    2.65   1 
   3  -3  10    4.21    1.99   1 
   3   3  10    3.31    1.79   1 
   3  -3  11   49.56    3.39   1 
   3   3  11   44.34    3.10   1 
   3  -3  12    2.06    2.14   1 
   3   3  12    1.13    2.13   1 
   3  -3  13   -0.48    2.17   1 
   3   3  13   -0.07    2.18   1 
   3  -3  14    1.41    2.42   1 
   3   3  14    1.78    2.39   1 
   3  -3  15    4.79    2.99   1 
  -3  -4  14    8.36    2.18   1 
  -3  -4  13   29.68    2.38   1 
  -3  -4  12   21.91    2.14   1 
  -3  -4  11    2.65    1.65   1 
   3   4  -9    9.01    2.25   1 
   3   4  -8  148.23    5.07   1 
  -3   4   7    2.89    1.26   1 
   3   4  -7   -0.90    1.58   1 
   3   4  -6   31.70    2.52   1 
   3   4  -5   50.94    2.88   1 
   3  -4  -4    2.11    1.05   1 
   3   4  -4    2.48    1.47   1 
   3  -4  -3    0.88    0.87   1 
   3   4  -3   -0.04    1.12   1 
   3  -4  -2   95.14    3.17   1 
   3   4  -2   83.14    3.44   1 
   3  -4  -1    5.10    1.26   1 
   3   4  -1    2.42    1.45   1 
   3  -4   0   33.98    2.07   1 
   3   4   0   34.11    2.29   1 
   3  -4   1   24.38    1.87   1 
   3   4   1   22.90    2.01   1 
   3  -4   2  226.52    5.33   1 
   3   4   2  225.75    5.59   1 
   3  -4   3   15.66    2.20   1 
   3   4   3   14.08    2.23   1 
   3  -4   4   10.39    1.88   1 
   3   4   4    8.35    1.90   1 
   3  -4   5    4.76    1.63   1 
   3   4   5    5.40    1.74   1 
   3  -4   6   21.84    2.08   1 
   3   4   6   21.32    2.07   1 
   3  -4   7    7.59    1.99   1 
   3   4   7    6.38    1.92   1 
   3  -4   8   32.20    2.66   1 
   3   4   8   33.07    2.61   1 
   3  -4   9   16.88    2.73   1 
   3   4   9   18.44    2.77   1 
   3  -4  10   19.78    3.09   1 
   3   4  10   19.80    3.00   1 
   3  -4  11    2.06    2.03   1 
   3   4  11    3.47    2.18   1 
   3  -4  12   13.80    2.95   1 
   3   4  12   15.23    2.98   1 
   3  -4  13    2.62    2.23   1 
   3   4  13    0.09    2.21   1 
   3  -4  14   -2.67    2.37   1 
   3   4  14    0.90    2.51   1 
   3  -4  15    0.50    2.64   1 
  -3  -5  14   18.35    2.94   1 
  -3  -5  13    9.03    2.76   1 
  -3  -5  12   13.98    2.90   1 
  -3  -5  11    0.95    1.65   1 
  -3   5  11    2.19    1.60   1 
  -3   5  10   38.88    2.50   1 
   3   5 -10   40.48    3.35   1 
  -3   5   9    7.09    1.75   1 
   3   5  -9   10.79    2.73   1 
  -3   5   8   34.53    2.26   1 
   3   5  -8   39.52    3.11   1 
  -3   5   7    0.49    1.34   1 
   3   5  -7   -0.79    1.78   1 
  -3   5   6    4.72    1.61   1 
   3   5  -6    6.58    2.12   1 
  -3   5   5    0.15    1.29   1 
   3   5  -5    0.10    1.64   1 
  -3   5   4   13.59    1.98   1 
   3   5  -4   11.96    2.38   1 
  -3   5   3   12.06    1.99   1 
   3   5  -3   12.74    2.35   1 
   3  -5  -2   70.78    2.94   1 
   3   5  -2   65.41    3.55   1 
   3  -5  -1   -0.10    1.03   1 
   3   5  -1    0.02    1.31   1 
   3  -5   0  132.77    4.32   1 
   3   5   0  130.82    4.73   1 
   3  -5   1   30.17    2.20   1 
   3   5   1   33.40    2.60   1 
   3  -5   2    1.07    1.23   1 
   3   5   2   -0.09    1.33   1 
   3  -5   3   24.68    2.19   1 
   3   5   3   25.08    2.23   1 
   3  -5   4   -0.38    1.20   1 
   3   5   4   -0.56    1.42   1 
   3  -5   5    4.67    1.74   1 
   3   5   5    3.17    1.65   1 
   3  -5   6   12.02    2.32   1 
   3   5   6   12.36    2.35   1 
   3  -5   7   10.49    2.26   1 
   3   5   7   11.19    2.47   1 
   3  -5   8   41.84    3.02   1 
   3   5   8   40.59    2.98   1 
   3  -5   9    2.61    1.96   1 
   3   5   9    2.35    2.08   1 
   3  -5  10   29.41    2.97   1 
   3   5  10   30.47    2.86   1 
   3  -5  11   10.90    2.68   1 
   3   5  11   13.15    2.96   1 
   3  -5  12    0.43    2.17   1 
   3   5  12   -0.52    2.27   1 
   3  -5  13    0.48    2.29   1 
   3   5  13    1.11    2.57   1 
   3  -5  14   17.74    3.59   1 
   3   5  14   25.34    4.13   1 
   3  -5  15    1.18    2.73   1 
  -3  -6  14    3.77    2.43   1 
  -3  -6  13    1.15    2.11   1 
  -3  -6  12    6.25    2.45   1 
  -3   6  12    5.33    2.33   1 
  -3  -6  11    8.58    2.43   1 
  -3   6  11    6.41    2.21   1 
  -3   6  10   11.37    2.24   1 
   3   6 -10   12.98    3.50   1 
  -3   6   9   33.73    2.52   1 
   3   6  -9   34.80    3.31   1 
  -3   6   8   13.43    2.30   1 
   3   6  -8   14.42    3.03   1 
  -3   6   7   42.32    2.71   1 
   3   6  -7   45.36    3.59   1 
  -3   6   6    3.41    1.60   1 
   3   6  -6    4.31    2.20   1 
  -3   6   5    7.54    1.90   1 
   3   6  -5    5.46    2.08   1 
  -3   6   4   28.32    2.35   1 
   3   6  -4   27.73    2.62   1 
  -3   6   3    3.44    1.64   1 
   3   6  -3    1.26    1.64   1 
  -3   6   2    0.04    1.36   1 
   3   6  -2   -0.89    1.49   1 
   3  -6  -1    2.81    1.35   1 
   3   6  -1    4.20    1.84   1 
   3  -6   0    3.74    1.52   1 
   3   6   0    2.40    1.56   1 
   3  -6   1   21.23    2.73   1 
   3   6   1   21.11    2.90   1 
   3  -6   2   10.85    2.19   1 
   3   6   2    7.80    2.15   1 
   3  -6   3   -0.27    1.43   1 
   3   6   3    0.21    1.61   1 
   3  -6   4   20.55    2.89   1 
   3   6   4   19.82    2.99   1 
   3  -6   5   11.62    2.42   1 
   3   6   5   13.08    2.60   1 
   3  -6   6    8.50    2.34   1 
   3   6   6   10.10    2.45   1 
   3  -6   7   16.54    2.98   1 
   3   6   7   22.00    3.12   1 
   3  -6   8   21.88    3.19   1 
   3   6   8   21.25    2.53   1 
   3  -6   9   42.94    3.40   1 
   3   6   9   39.54    3.20   1 
   3  -6  10   -0.11    1.96   1 
   3   6  10    0.70    2.21   1 
   3  -6  11    0.95    2.08   1 
   3   6  11    3.19    2.43   1 
   3  -6  12   43.09    3.65   1 
   3   6  12   48.17    3.82   1 
   3  -6  13    2.35    2.46   1 
   3   6  13    3.49    2.92   1 
   3  -6  14    2.50    2.75   1 
   3   6  14    4.34    3.35   1 
   3  -6  15   -0.43    2.80   1 
  -3  -7  14    0.22    2.55   1 
  -3  -7  13    1.73    2.65   1 
  -3  -7  12   -1.27    2.28   1 
  -3   7  12   -0.82    2.38   1 
  -3   7  11    2.53    2.25   1 
   3   7 -11    6.13    3.49   1 
  -3   7  10    7.19    2.42   1 
   3   7 -10    6.67    3.21   1 
  -3   7   9    7.84    2.43   1 
   3   7  -9    4.65    2.75   1 
  -3   7   8    1.33    1.79   1 
   3   7  -8   -0.55    2.46   1 
  -3   7   7   67.10    3.66   1 
   3   7  -7   73.11    4.67   1 
  -3   7   6    0.84    1.66   1 
   3   7  -6   -1.04    2.17   1 
  -3   7   5    5.50    1.89   1 
   3   7  -5    4.65    2.34   1 
  -3   7   4   10.87    2.33   1 
   3   7  -4   10.65    2.85   1 
  -3   7   3   25.03    2.51   1 
   3   7  -3   29.08    2.87   1 
  -3   7   2   -0.19    1.46   1 
   3   7  -2   -0.29    1.67   1 
  -3   7   1   14.31    2.76   1 
   3   7  -1   12.78    2.70   1 
   3  -7   0    7.58    1.87   1 
   3   7   0    5.54    2.18   1 
   3  -7   1   66.25    3.62   1 
   3   7   1   67.45    4.15   1 
   3  -7   2    4.05    1.93   1 
   3   7   2    2.89    2.00   1 
   3  -7   3   85.79    4.18   1 
   3   7   3   80.78    4.31   1 
   3  -7   4    0.73    1.74   1 
   3   7   4    0.58    1.76   1 
   3  -7   5    6.01    2.11   1 
   3   7   5    4.15    2.12   1 
   3  -7   6    0.94    1.92   1 
   3   7   6    0.58    1.89   1 
   3  -7   7   24.18    2.79   1 
   3   7   7   22.82    2.78   1 
   3  -7   8   15.99    3.25   1 
   3   7   8   16.84    3.33   1 
   3  -7   9    0.18    2.08   1 
   3   7   9    4.46    2.68   1 
   3  -7  10   16.08    3.32   1 
   3   7  10   15.01    3.58   1 
   3  -7  11    5.63    2.66   1 
   3   7  11    7.11    2.98   1 
   3  -7  12    3.39    2.75   1 
   3   7  12    4.50    2.96   1 
   3  -7  13    0.09    2.48   1 
   3   7  13    1.95    2.96   1 
   3  -7  14    4.62    3.04   1 
   3   7  14    6.69    3.56   1 
   3  -7  15    6.06    3.23   1 
   3  -7  16   -0.72    3.13   1 
  -3  -8  14    3.46    3.00   1 
  -3  -8  13    1.75    2.78   1 
  -3  -8  12   20.32    3.86   1 
  -3   8  12   16.75    3.47   1 
  -3   8  11    2.52    2.55   1 
   3   8 -11    0.31    2.85   1 
  -3   8  10    3.73    2.53   1 
   3   8 -10    1.94    3.08   1 
  -3   8   9   32.91    3.16   1 
   3   8  -9   32.85    4.82   1 
  -3   8   8   27.86    2.88   1 
   3   8  -8   33.86    4.90   1 
  -3   8   7    2.42    2.28   1 
   3   8  -7    3.56    3.07   1 
  -3   8   6    7.89    2.36   1 
   3   8  -6    5.03    2.79   1 
  -3   8   5   48.85    3.26   1 
   3   8  -5   56.45    4.31   1 
  -3   8   4   -0.29    1.69   1 
   3   8  -4    0.07    2.04   1 
  -3   8   3    9.92    2.56   1 
   3   8  -3    7.18    2.63   1 
  -3   8   2   23.75    2.71   1 
   3   8  -2   29.80    3.97   1 
  -3   8   1   25.43    2.61   1 
   3   8  -1   26.80    2.91   1 
  -3   8   0   -0.81    1.75   1 
   3   8   0   -1.16    1.79   1 
   3  -8   1   -0.12    1.49   1 
   3   8   1   -1.23    1.75   1 
   3  -8   2   55.25    3.58   1 
   3   8   2   53.61    3.92   1 
   3  -8   3   27.39    3.59   1 
   3   8   3   19.90    3.44   1 
   3  -8   4   -0.47    1.71   1 
   3   8   4   -1.14    2.05   1 
   3  -8   5    4.43    2.16   1 
   3   8   5    5.23    2.26   1 
   3  -8   6    7.98    2.64   1 
   3   8   6    7.51    2.44   1 
   3  -8   7    7.07    2.62   1 
   3   8   7    5.23    2.52   1 
   3  -8   8    2.89    2.45   1 
   3   8   8    3.08    2.35   1 
   3  -8   9    5.56    2.78   1 
   3   8   9    9.21    3.05   1 
   3  -8  10   19.83    3.85   1 
   3   8  10   15.56    3.62   1 
   3  -8  11   -1.19    2.43   1 
   3   8  11   -1.32    2.57   1 
   3  -8  12    0.69    2.79   1 
   3   8  12   -0.93    2.80   1 
   3  -8  13    8.06    3.33   1 
   3   8  13    7.21    3.62   1 
   3  -8  14    1.44    3.22   1 
   3   8  14    3.47    3.86   1 
   3  -8  15    1.18    3.36   1 
   3  -8  16   -1.90    3.19   1 
  -3  -9  15   15.53    4.46   1 
  -3  -9  14   42.50    4.49   1 
  -3  -9  13    1.95    3.24   1 
  -3  -9  12   -0.34    2.64   1 
  -3   9  12   -0.70    2.79   1 
  -3   9  11   -0.48    2.61   1 
   3   9 -11   -0.09    3.21   1 
  -3   9  10   25.09    4.01   1 
   3   9 -10   28.14    5.03   1 
  -3   9   9    4.88    2.80   1 
   3   9  -9    4.68    3.42   1 
  -3   9   8   26.81    3.13   1 
   3   9  -8   37.07    5.52   1 
  -3   9   7   23.58    2.93   1 
   3   9  -7   15.61    4.14   1 
  -3   9   6   25.75    2.92   1 
   3   9  -6   33.47    5.00   1 
  -3   9   5    9.69    2.61   1 
   3   9  -5    7.32    3.19   1 
  -3   9   4   26.77    3.73   1 
   3   9  -4   26.27    4.20   1 
  -3   9   3   21.03    3.49   1 
   3   9  -3   14.07    3.53   1 
  -3   9   2    9.29    2.79   1 
   3   9  -2   11.46    3.10   1 
  -3   9   1    4.28    2.24   1 
   3   9  -1    3.77    2.31   1 
  -3   9   0   77.19    4.80   1 
   3   9   0   84.45    5.04   1 
   3  -9   1   41.60    3.42   1 
   3   9   1   29.29    3.10   1 
   3  -9   2    6.47    2.37   1 
   3   9   2    3.21    2.34   1 
   3  -9   3    4.07    2.23   1 
   3   9   3    3.29    2.44   1 
   3  -9   4   29.02    3.23   1 
   3   9   4   24.96    3.07   1 
   3  -9   5    1.28    2.16   1 
   3   9   5    0.52    2.26   1 
   3  -9   6   19.47    3.56   1 
   3   9   6   15.60    3.49   1 
   3  -9   7    4.06    2.59   1 
   3   9   7    1.47    2.33   1 
   3  -9   8   68.35    4.79   1 
   3   9   8   66.62    4.69   1 
   3  -9   9    1.64    2.64   1 
   3   9   9   -0.15    2.59   1 
   3  -9  10   21.24    4.24   1 
   3   9  10   18.78    4.10   1 
   3  -9  11    0.63    2.80   1 
   3   9  11    0.48    2.99   1 
   3  -9  12   -1.49    2.87   1 
   3   9  12    1.43    3.43   1 
   3  -9  13   -0.36    3.15   1 
   3   9  13   -0.51    3.36   1 
   3  -9  14    1.95    3.30   1 
   3  -9  15   -0.81    3.60   1 
   3  -9  16   -0.07    3.67   1 
  -3 -10  15   15.07    4.70   1 
  -3 -10  14   -0.07    3.54   1 
  -3 -10  13    5.17    3.67   1 
  -3 -10  12    5.60    3.32   1 
  -3  10  12    4.85    3.42   1 
  -3  10  11   -0.40    3.01   1 
   3  10 -11   -0.03    3.42   1 
  -3  10  10    8.02    3.41   1 
   3  10 -10    5.14    4.05   1 
  -3  10   9   -0.12    2.75   1 
   3  10  -9    0.73    3.27   1 
  -3  10   8   43.63    3.96   1 
   3  10  -8   51.26    5.12   1 
  -3  10   7    1.43    2.46   1 
   3  10  -7    3.26    3.21   1 
  -3  10   6   27.02    3.18   1 
   3  10  -6   41.37    5.83   1 
  -3  10   5    6.75    2.59   1 
   3  10  -5    4.46    3.19   1 
  -3  10   4   -0.33    2.26   1 
   3  10  -4    2.10    2.56   1 
  -3  10   3    1.32    2.30   1 
   3  10  -3    0.18    2.51   1 
  -3  10   2   26.91    3.30   1 
   3  10  -2   27.81    3.27   1 
  -3  10   1    5.93    2.57   1 
   3  10  -1    4.09    2.64   1 
  -3  10   0    5.78    2.68   1 
   3  10   0    3.49    2.70   1 
   3 -10   1   13.87    3.04   1 
   3  10   1   10.98    3.15   1 
   3 -10   2   82.13    4.93   1 
   3  10   2   83.29    5.26   1 
   3 -10   3   13.17    3.16   1 
   3  10   3   10.18    3.16   1 
   3 -10   4    1.29    2.19   1 
   3  10   4   -0.25    2.21   1 
   3 -10   5   27.12    3.23   1 
   3  10   5   30.12    4.49   1 
   3 -10   6   20.87    3.92   1 
   3  10   6   20.05    3.97   1 
   3 -10   7    1.05    2.51   1 
   3  10   7   -0.14    2.66   1 
   3 -10   8    0.50    2.69   1 
   3  10   8    0.83    2.80   1 
   3 -10   9    5.43    3.30   1 
   3  10   9    5.87    3.35   1 
   3 -10  10   13.77    4.16   1 
   3  10  10   13.59    4.03   1 
   3 -10  11    3.98    3.38   1 
   3  10  11    5.77    3.54   1 
   3 -10  12    4.45    3.58   1 
   3  10  12    8.96    3.97   1 
   3 -10  13    4.72    3.75   1 
   3  10  13    5.13    3.90   1 
   3 -10  14   -0.97    3.78   1 
   3 -10  15   -1.35    3.86   1 
   3 -10  16    2.11    4.04   1 
  -3 -11  15    3.49    4.10   1 
  -3 -11  14    3.17    3.92   1 
  -3 -11  13    5.62    4.06   1 
  -3 -11  12   -1.12    3.09   1 
  -3  11  12    0.52    3.77   1 
  -3  11  11    0.94    3.47   1 
   3  11 -11    4.16    4.16   1 
  -3  11  10   -0.17    3.08   1 
   3  11 -10    1.37    4.15   1 
  -3  11   9    1.87    3.09   1 
   3  11  -9    6.59    4.09   1 
  -3  11   8    1.10    2.78   1 
   3  11  -8    0.07    3.46   1 
  -3  11   7   29.46    4.52   1 
   3  11  -7   23.38    5.15   1 
  -3  11   6    3.60    2.87   1 
   3  11  -6    5.34    3.75   1 
  -3  11   5   30.88    4.51   1 
   3  11  -5   28.63    5.25   1 
  -3  11   4    7.23    2.99   1 
   3  11  -4    9.35    3.63   1 
  -3  11   3   -1.09    2.48   1 
   3  11  -3   -2.01    2.80   1 
  -3  11   2   -0.08    2.36   1 
   3  11  -2    0.68    2.61   1 
  -3  11   1    5.54    2.79   1 
   3  11  -1    4.84    2.92   1 
  -3  11   0    9.95    3.53   1 
   3  11   0    6.27    3.02   1 
   3 -11   1   27.77    4.28   1 
   3  11   1   26.21    4.67   1 
   3 -11   2    3.19    2.44   1 
   3  11   2    3.93    2.85   1 
   3 -11   3   32.10    3.50   1 
   3  11   3   29.65    3.55   1 
   3 -11   4   15.52    3.64   1 
   3  11   4   11.20    3.43   1 
   3 -11   5    7.36    3.00   1 
   3  11   5    6.15    3.23   1 
   3 -11   6    1.20    2.75   1 
   3  11   6    3.62    3.03   1 
   3 -11   7   38.67    5.20   1 
   3  11   7   34.26    5.22   1 
   3 -11   8    5.59    3.52   1 
   3  11   8    2.44    3.17   1 
   3 -11   9   -2.19    2.84   1 
   3  11   9   -0.36    3.22   1 
   3 -11  10   10.72    4.11   1 
   3  11  10    5.60    3.81   1 
   3 -11  11   21.97    5.00   1 
   3  11  11   23.08    5.06   1 
   3 -11  12    3.68    3.79   1 
   3  11  12    1.60    3.88   1 
   3 -11  13    2.83    3.90   1 
   3  11  13    3.83    4.12   1 
   3 -11  14   -1.88    3.86   1 
   3 -11  15    3.58    4.62   1 
   3 -11  16    1.12    4.68   1 
  -3 -12  15    8.19    4.81   1 
  -3 -12  14    0.25    4.21   1 
  -3 -12  13    3.82    4.45   1 
  -3 -12  12    0.20    3.51   1 
  -3  12  12   -1.73    4.08   1 
  -3  12  11    5.65    4.36   1 
   3  12 -11    2.97    4.46   1 
  -3  12  10    0.84    3.61   1 
   3  12 -10   -3.98    4.35   1 
  -3  12   9   12.50    4.32   1 
   3  12  -9   12.90    4.94   1 
  -3  12   8   10.93    3.84   1 
   3  12  -8   11.74    4.62   1 
  -3  12   7    0.70    3.08   1 
   3  12  -7    1.01    4.07   1 
  -3  12   6   10.89    3.65   1 
   3  12  -6    8.48    4.09   1 
  -3  12   5    9.33    3.62   1 
   3  12  -5    9.16    4.02   1 
  -3  12   4    0.96    2.75   1 
   3  12  -4   -1.03    3.19   1 
  -3  12   3   11.70    3.86   1 
   3  12  -3    5.57    3.57   1 
  -3  12   2    4.69    3.04   1 
   3  12  -2    6.07    3.40   1 
  -3  12   1   29.36    4.73   1 
   3  12  -1   28.52    4.91   1 
  -3  12   0    0.90    2.92   1 
   3  12   0    0.47    2.90   1 
   3 -12   1   29.14    3.47   1 
   3  12   1   34.83    5.39   1 
   3 -12   2   10.91    3.27   1 
   3  12   2    8.41    3.36   1 
   3 -12   3   26.69    4.34   1 
   3  12   3   22.28    4.60   1 
   3 -12   4    6.19    3.21   1 
   3  12   4    6.05    3.27   1 
   3 -12   5   34.41    3.96   1 
   3  12   5   40.50    5.71   1 
   3 -12   6   -1.54    2.73   1 
   3  12   6    0.95    3.20   1 
   3 -12   7    0.05    2.72   1 
   3  12   7    0.09    2.95   1 
   3 -12   8   14.32    4.50   1 
   3  12   8    9.73    3.78   1 
   3 -12   9   26.16    5.39   1 
   3  12   9   18.60    4.63   1 
   3 -12  10    3.70    3.82   1 
   3  12  10    5.15    3.79   1 
   3 -12  11    1.16    3.85   1 
   3  12  11    1.53    3.91   1 
   3 -12  12    4.42    4.05   1 
   3  12  12    5.53    4.58   1 
   3 -12  13    2.92    4.48   1 
   3  12  13    2.00    4.64   1 
   3 -12  14   -0.86    4.32   1 
   3 -12  15   -2.43    4.65   1 
   3 -12  16    2.22    5.14   1 
  -3 -13  15   -2.39    4.73   1 
  -3 -13  14    8.67    4.94   1 
  -3 -13  13    4.78    4.62   1 
  -3 -13  12    0.37    3.83   1 
  -3  13  12   -0.03    4.77   1 
  -3  13  11   -1.52    4.34   1 
   3  13 -11   -1.60    4.91   1 
  -3  13  10   18.94    5.27   1 
   3  13 -10   15.96    6.09   1 
  -3  13   9    0.31    3.78   1 
   3  13  -9    1.47    4.03   1 
  -3  13   8   11.09    4.73   1 
   3  13  -8    9.39    4.94   1 
  -3  13   7    0.70    3.55   1 
   3  13  -7    2.34    4.19   1 
  -3  13   6    8.85    4.19   1 
   3  13  -6    9.15    4.74   1 
  -3  13   5    0.64    3.52   1 
   3  13  -5    3.37    3.61   1 
  -3  13   4   33.20    5.68   1 
   3  13  -4   34.79    6.22   1 
  -3  13   3   16.52    4.21   1 
   3  13  -3   23.50    5.35   1 
  -3  13   2    1.52    2.99   1 
   3  13  -2    4.90    3.83   1 
  -3  13   1   22.34    4.83   1 
   3  13  -1   16.66    4.48   1 
  -3  13   0   80.75    6.08   1 
   3  13   0   85.97    6.28   1 
   3 -13   1   20.02    4.04   1 
   3  13   1   19.19    4.56   1 
   3 -13   2   -0.26    2.67   1 
   3  13   2   -1.48    3.04   1 
   3 -13   3   10.44    3.48   1 
   3  13   3    6.40    3.60   1 
   3 -13   4   29.04    4.97   1 
   3  13   4   21.81    4.74   1 
   3 -13   5    6.00    3.26   1 
   3  13   5    3.36    3.35   1 
   3 -13   6    3.90    3.24   1 
   3  13   6    5.45    3.48   1 
   3 -13   7    7.39    3.71   1 
   3  13   7    3.43    3.51   1 
   3 -13   8   28.15    5.51   1 
   3  13   8   22.42    5.15   1 
   3 -13   9    5.54    4.27   1 
   3  13   9    3.90    4.05   1 
   3 -13  10    3.40    4.17   1 
   3  13  10    2.71    4.11   1 
   3 -13  11   -0.58    4.09   1 
   3  13  11    2.77    4.12   1 
   3 -13  12    7.11    4.58   1 
   3  13  12    7.45    4.77   1 
   3 -13  13    1.88    4.61   1 
   3  13  13   -1.93    4.57   1 
   3 -13  14   -0.49    4.64   1 
   3 -13  15    0.97    5.37   1 
  -3 -14  15    7.64    5.96   1 
  -3 -14  14    3.31    4.96   1 
  -3 -14  13   -0.41    5.11   1 
  -3 -14  12    6.31    4.85   1 
  -3  14  11   -0.58    4.60   1 
   3  14 -11   -1.26    5.25   1 
  -3  14  10    2.47    4.55   1 
   3  14 -10   -1.38    4.99   1 
  -3  14   9    4.30    4.80   1 
   3  14  -9    0.98    4.94   1 
  -3  14   8   28.00    6.25   1 
   3  14  -8   31.89    6.78   1 
  -3  14   7    3.27    4.19   1 
   3  14  -7    0.92    4.22   1 
  -3  14   6   29.00    5.83   1 
   3  14  -6   25.59    6.25   1 
  -3  14   5    4.74    3.78   1 
   3  14  -5   -0.84    3.70   1 
  -3  14   4    6.18    3.86   1 
   3  14  -4    8.64    4.26   1 
  -3  14   3    0.33    3.04   1 
   3  14  -3   -0.15    3.84   1 
  -3  14   2   41.19    6.03   1 
   3  14  -2   36.64    6.40   1 
  -3  14   1    2.34    3.58   1 
   3  14  -1    1.86    3.61   1 
   3 -14   0    0.97    2.91   1 
   3  14   0    1.98    3.73   1 
   3 -14   1    8.11    3.39   1 
   3  14   1    3.88    3.76   1 
   3 -14   2   53.39    4.92   1 
   3  14   2   46.97    5.16   1 
   3 -14   3    1.47    3.21   1 
   3  14   3    4.77    3.79   1 
   3 -14   4    1.75    3.23   1 
   3  14   4    0.71    3.51   1 
   3 -14   5    0.21    2.94   1 
   3  14   5   -1.93    3.36   1 
   3 -14   6   28.35    5.62   1 
   3  14   6   15.23    4.87   1 
   3 -14   7    2.08    3.53   1 
   3  14   7   -1.01    3.56   1 
   3 -14   8   -3.28    3.67   1 
   3  14   8    1.53    3.91   1 
   3 -14   9    8.98    4.70   1 
   3  14   9    8.12    4.58   1 
   3 -14  10   14.71    5.16   1 
   3  14  10   15.38    5.57   1 
   3 -14  11    2.81    4.87   1 
   3  14  11   -0.45    4.53   1 
   3 -14  12    1.81    4.85   1 
   3  14  12   -2.43    4.75   1 
   3 -14  13   -0.58    5.02   1 
   3 -14  14    6.77    6.32   1 
  -3 -15  14    1.22    5.27   1 
  -3 -15  13    0.29    5.43   1 
  -3 -15  12   -2.64    4.30   1 
  -3  15  11   10.00    5.32   1 
  -3  15  10    4.88    4.92   1 
   3  15 -10    0.46    5.37   1 
  -3  15   9    5.52    4.80   1 
   3  15  -9    4.91    5.57   1 
  -3  15   8    0.25    4.06   1 
   3  15  -8    2.27    4.94   1 
  -3  15   7   10.78    4.73   1 
   3  15  -7   10.23    5.62   1 
  -3  15   6    8.90    4.58   1 
   3  15  -6    8.37    4.89   1 
  -3  15   5   -1.15    3.60   1 
   3  15  -5   -0.34    4.56   1 
  -3  15   4    2.31    3.71   1 
   3  15  -4    2.33    4.29   1 
  -3  15   3    5.23    4.27   1 
   3  15  -3    1.26    3.89   1 
  -3  15   2    4.75    3.95   1 
   3  15  -2    4.54    4.23   1 
   3  15  -1   -1.44    4.12   1 
   3 -15   0   18.78    4.33   1 
   3  15   0   19.20    5.26   1 
   3 -15   1    5.78    3.51   1 
   3  15   1    8.71    4.53   1 
   3 -15   2    1.42    3.17   1 
   3  15   2   -0.13    3.93   1 
   3 -15   3   11.96    4.39   1 
   3  15   3   10.21    4.67   1 
   3 -15   4    9.00    4.14   1 
   3  15   4    6.11    4.51   1 
   3 -15   5    1.98    3.27   1 
   3  15   5   -1.71    3.78   1 
   3 -15   6    1.22    3.79   1 
   3  15   6    0.34    3.93   1 
   3 -15   7   13.02    4.45   1 
   3  15   7   11.31    4.92   1 
   3 -15   8   10.54    4.80   1 
   3  15   8    8.78    4.96   1 
   3 -15   9   -4.07    4.18   1 
   3  15   9   -4.11    4.30   1 
   3 -15  10    2.48    4.45   1 
   3  15  10   -0.15    5.13   1 
   3 -15  11    4.09    5.21   1 
   3  15  11    5.73    5.37   1 
   3 -15  12    1.40    5.16   1 
   3  15  12   -2.62    5.27   1 
   3 -15  13   -1.74    5.28   1 
  -3 -16  12    2.06    4.88   1 
  -3 -16  11    1.54    4.65   1 
  -3  16  11    5.54    6.35   1 
  -3  16  10    0.58    5.57   1 
   3  16 -10   -0.78    6.10   1 
  -3  16   9    3.17    5.30   1 
   3  16  -9    1.18    5.71   1 
  -3  16   8    0.26    4.34   1 
   3  16  -8    0.86    5.58   1 
  -3  16   7    0.99    4.46   1 
   3  16  -7   -2.79    4.84   1 
  -3  16   6   -1.35    4.23   1 
   3  16  -6   -0.45    5.16   1 
  -3  16   5   -0.24    4.14   1 
   3  16  -5    1.60    4.33   1 
  -3  16   4   -2.32    3.97   1 
   3  16  -4   -3.68    4.51   1 
  -3  16   3   -1.47    3.96   1 
   3  16  -3   -2.06    4.10   1 
   3 -16  -2    0.72    3.36   1 
   3  16  -2   -3.36    3.87   1 
   3 -16  -1   12.27    4.15   1 
   3  16  -1    6.62    4.60   1 
   3 -16   0   -0.31    3.33   1 
   3  16   0   -3.29    3.98   1 
   3 -16   1   14.61    4.28   1 
   3  16   1   13.58    5.14   1 
   3 -16   2    1.10    3.48   1 
   3  16   2    4.08    4.49   1 
   3 -16   3    0.93    3.84   1 
   3  16   3    1.20    4.30   1 
   3 -16   4    2.51    3.89   1 
   3  16   4   -2.85    4.07   1 
   3 -16   5    7.94    4.03   1 
   3  16   5    3.04    4.75   1 
   3 -16   6    3.72    3.95   1 
   3  16   6    1.78    4.60   1 
   3 -16   7    1.49    3.96   1 
   3  16   7    0.00    4.67   1 
   3 -16   8    2.79    4.31   1 
   3  16   8    3.36    5.14   1 
   3 -16   9   14.87    6.02   1 
   3  16   9   11.36    6.07   1 
   3 -16  10   -2.30    4.65   1 
   3  16  10   -1.01    5.23   1 
   3 -16  11   -4.18    4.99   1 
   3  16  11    1.03    6.08   1 
   3  17  -9   -1.14    5.71   1 
  -3  17   8    1.56    5.40   1 
   3  17  -8   -3.39    5.90   1 
  -3  17   7   -2.88    4.87   1 
   3  17  -7    2.42    5.74   1 
  -3  17   6   -1.96    4.73   1 
   3  17  -6   -4.44    5.02   1 
   3  17  -5   -1.18    5.17   1 
   3  17  -4    0.51    4.75   1 
   3 -17  -3   -0.30    3.36   1 
   3  17  -3    1.37    4.71   1 
   3 -17  -2    2.53    3.56   1 
   3  17  -2   -2.92    4.94   1 
   3 -17  -1    2.65    3.74   1 
   3  17  -1    0.10    4.52   1 
   3 -17   0    3.21    3.73   1 
   3  17   0    0.75    4.38   1 
   3 -17   1    2.98    3.50   1 
   3  17   1    2.21    4.61   1 
   3 -17   2    5.05    4.01   1 
   3  17   2    3.82    4.93   1 
   3 -17   3   15.06    5.25   1 
   3  17   3   12.54    5.84   1 
   3 -17   4   -0.63    3.71   1 
   3  17   4    0.92    4.68   1 
   3 -17   5   -1.99    3.74   1 
   3  17   5    0.98    4.90   1 
   3 -17   6    1.21    4.34   1 
   3  17   6   -0.94    4.96   1 
   3 -17   7    5.81    4.46   1 
   3  17   7    9.34    5.65   1 
   3 -17   8    2.67    4.71   1 
   3  17   8   -3.04    5.18   1 
   3 -17   9   -0.56    4.97   1 
   3  17   9    1.26    5.79   1 
   3 -18  -7   -0.18    4.37   1 
   3  18  -7   -0.20    6.43   1 
   3 -18  -6    2.25    4.30   1 
   3  18  -6    0.22    5.64   1 
   3 -18  -5    1.88    4.18   1 
   3  18  -5   -2.66    5.02   1 
   3 -18  -4    0.85    3.86   1 
   3  18  -4   -2.78    5.36   1 
   3 -18  -3    0.20    3.90   1 
   3  18  -3    4.96    5.28   1 
   3 -18  -2    4.59    4.22   1 
   3  18  -2    3.79    5.11   1 
   3 -18  -1    0.55    3.63   1 
   3  18  -1    2.30    5.21   1 
   3 -18   0    1.37    3.80   1 
   3  18   0    2.07    5.34   1 
   3 -18   1    8.44    4.71   1 
   3  18   1    4.55    5.33   1 
   3 -18   2   12.12    4.96   1 
   3  18   2    3.17    5.09   1 
   3 -18   3   -1.59    4.06   1 
   3  18   3   -0.49    4.89   1 
   3 -18   4   -3.57    3.66   1 
   3  18   4    3.02    5.25   1 
   3 -18   5    4.61    4.93   1 
   3  18   5    5.65    5.54   1 
   3 -18   6    0.02    4.48   1 
   3  18   6    0.81    5.75   1 
   4   0  -5    2.73    0.87   1 
   4   0  -4    8.55    1.19   1 
   4   0  -3    6.62    1.21   1 
   4   0  -2   76.17    2.37   1 
   4   0  -1    1.24    0.80   1 
   4   0   0    1.03    0.83   1 
   4   0   1    3.96    1.14   1 
   4   0   2    0.62    0.88   1 
   4   0   3   26.41    1.93   1 
   4   0   4   90.73    3.49   1 
   4   0   5    0.05    1.15   1 
   4   0   6   62.99    3.17   1 
   4   0   7    4.27    1.65   1 
   4   0   8   95.94    4.25   1 
   4   0   9    0.14    1.70   1 
   4   0  10  192.93    6.26   1 
   4   0  11   19.22    3.48   1 
   4   0  12    8.05    2.90   1 
   4   0  13    0.04    2.25   1 
   4   0  14   29.08    3.23   1 
   4   0  15    1.78    2.91   1 
   4   1  -6   22.14    1.49   1 
   4  -1  -5   19.64    1.21   1 
   4   1  -5   23.39    1.51   1 
   4  -1  -4   20.82    1.27   1 
   4   1  -4   22.37    1.48   1 
   4  -1  -3   42.53    1.77   1 
   4   1  -3   44.62    1.99   1 
   4  -1  -2    1.94    0.84   1 
   4   1  -2    2.36    0.92   1 
   4  -1  -1  153.71    3.56   1 
   4   1  -1  149.86    3.77   1 
   4  -1   0  280.32    5.08   1 
   4   1   0  295.69    5.51   1 
   4  -1   1   80.96    2.83   1 
   4   1   1   86.84    2.99   1 
   4  -1   2  286.65    5.74   1 
   4   1   2  280.91    5.82   1 
   4  -1   3    6.20    1.45   1 
   4   1   3    7.85    1.59   1 
   4  -1   4   25.24    1.97   1 
   4   1   4   27.30    2.10   1 
   4  -1   5   74.73    3.37   1 
   4   1   5   74.74    3.38   1 
   4  -1   6    5.10    1.65   1 
   4   1   6    5.00    1.76   1 
   4  -1   7    3.66    1.70   1 
   4   1   7    3.54    1.69   1 
   4  -1   8   99.45    4.20   1 
   4   1   8   94.81    4.10   1 
   4  -1   9   94.76    4.38   1 
   4   1   9   87.24    4.15   1 
   4  -1  10    4.88    2.07   1 
   4   1  10    4.00    2.26   1 
   4  -1  11   16.79    3.16   1 
   4   1  11   18.22    3.21   1 
   4  -1  12   43.46    3.53   1 
   4   1  12   41.46    3.47   1 
   4  -1  13   32.31    3.25   1 
   4   1  13   30.72    3.21   1 
   4  -1  14    1.13    2.51   1 
   4   1  14    0.27    2.55   1 
   4  -1  15   -0.35    2.91   1 
   4   1  15    1.88    2.85   1 
   4   2  -9   40.76    2.41   1 
   4   2  -8   -0.17    1.29   1 
   4   2  -7  123.09    3.50   1 
   4  -2  -6   14.63    1.11   1 
   4   2  -6   21.18    1.71   1 
   4  -2  -5   12.93    1.11   1 
   4   2  -5   14.09    1.49   1 
   4  -2  -4   25.16    1.41   1 
   4   2  -4   25.08    1.74   1 
   4  -2  -3  135.00    3.18   1 
   4   2  -3  131.46    3.64   1 
   4  -2  -2   56.23    2.16   1 
   4   2  -2   47.94    2.31   1 
   4  -2  -1  157.65    3.74   1 
   4   2  -1  152.65    4.00   1 
   4  -2   0   94.23    3.02   1 
   4   2   0   96.06    3.35   1 
   4  -2   1  163.01    4.18   1 
   4   2   1  162.51    4.42   1 
   4  -2   2   13.00    1.42   1 
   4   2   2   12.88    1.50   1 
   4  -2   3  132.03    4.01   1 
   4   2   3  138.30    4.30   1 
   4  -2   4   14.50    1.63   1 
   4   2   4   12.35    1.98   1 
   4  -2   6   19.63    1.97   1 
   4   2   6   17.99    1.96   1 
   4  -2   7   17.07    2.53   1 
   4   2   7   16.18    2.41   1 
   4  -2   8   18.53    2.82   1 
   4   2   8   17.95    2.21   1 
   4  -2   9    7.09    2.32   1 
   4   2   9    5.84    2.16   1 
   4  -2  10   10.93    2.60   1 
   4   2  10    9.42    2.48   1 
   4  -2  11  165.75    6.10   1 
   4   2  11  162.10    5.98   1 
   4  -2  12    6.77    2.61   1 
   4   2  12    5.98    2.66   1 
   4  -2  13    6.13    2.62   1 
   4   2  13    1.08    2.44   1 
   4  -2  14    6.95    2.89   1 
   4   2  14    5.02    2.75   1 
   4  -2  15   23.30    4.10   1 
  -4  -3  11    8.43    1.82   1 
   4   3 -10    1.34    1.98   1 
   4   3  -9   68.79    3.24   1 
   4   3  -8   30.26    2.42   1 
   4  -3  -7    2.16    0.98   1 
   4   3  -7    1.74    1.52   1 
   4  -3  -6   99.30    2.65   1 
   4   3  -6   95.55    3.66   1 
   4  -3  -5  307.67    4.94   1 
   4   3  -5  290.53    6.15   1 
   4  -3  -4    4.66    1.06   1 
   4   3  -4    3.78    1.50   1 
   4  -3  -3   23.65    1.55   1 
   4   3  -3   19.81    1.80   1 
   4  -3  -2   14.01    1.30   1 
   4   3  -2   13.90    1.60   1 
   4  -3  -1  265.47    5.20   1 
   4   3  -1  250.06    5.64   1 
   4  -3   0  235.05    5.03   1 
   4   3   0  233.07    5.51   1 
   4  -3   1   28.69    1.98   1 
   4   3   1   29.28    2.13   1 
   4  -3   2  102.94    3.54   1 
   4   3   2  112.10    3.94   1 
   4  -3   3    3.81    1.33   1 
   4   3   3    4.54    1.47   1 
   4  -3   4    5.62    1.63   1 
   4   3   4    6.64    1.71   1 
   4  -3   5   32.14    2.37   1 
   4   3   5   34.13    2.50   1 
   4  -3   6   32.61    2.50   1 
   4   3   6   32.30    2.55   1 
   4  -3   7    4.26    1.75   1 
   4   3   7    3.97    1.80   1 
   4  -3   8   10.05    2.27   1 
   4   3   8   10.93    2.40   1 
   4  -3   9   76.13    3.99   1 
   4   3   9   69.95    3.88   1 
   4  -3  10   15.08    2.88   1 
   4   3  10   12.43    2.65   1 
   4  -3  11    2.59    2.20   1 
   4   3  11    1.77    2.10   1 
   4  -3  12   11.98    3.00   1 
   4   3  12   11.29    2.84   1 
   4  -3  13   24.63    3.81   1 
   4   3  13   20.30    3.46   1 
   4  -3  14   -1.52    2.38   1 
   4   3  14    2.46    2.67   1 
   4  -3  15    2.75    2.92   1 
  -4  -4  13   -1.75    1.70   1 
  -4  -4  12   15.23    2.43   1 
   4   4 -11   17.46    3.14   1 
   4   4 -10   42.68    3.05   1 
   4  -4  -9    7.58    1.43   1 
   4   4  -9   10.00    2.48   1 
   4  -4  -8   14.30    1.42   1 
   4   4  -8   14.89    2.81   1 
   4  -4  -7   47.94    2.11   1 
   4   4  -7   47.02    3.08   1 
   4  -4  -6   45.31    2.07   1 
   4   4  -6   31.60    2.57   1 
   4  -4  -5    1.65    1.04   1 
   4   4  -5    0.78    1.55   1 
   4   4  -4    7.39    1.92   1 
   4  -4  -3   84.14    3.03   1 
   4   4  -3   74.87    3.60   1 
   4  -4  -2   17.04    1.54   1 
   4   4  -2   16.55    1.84   1 
   4  -4  -1   37.72    2.16   1 
   4   4  -1   35.96    2.46   1 
   4  -4   0  207.71    5.03   1 
   4   4   0  202.27    5.45   1 
   4  -4   1  412.30    7.39   1 
   4   4   1  411.72    8.03   1 
   4  -4   2    7.03    1.71   1 
   4   4   2    6.94    1.89   1 
   4  -4   3   43.51    2.59   1 
   4   4   3   45.06    2.80   1 
   4  -4   4   12.73    2.10   1 
   4   4   4   13.10    2.29   1 
   4  -4   5    1.48    1.38   1 
   4   4   5    2.32    1.61   1 
   4  -4   6    3.99    1.69   1 
   4   4   6    6.50    1.95   1 
   4  -4   7   10.53    2.23   1 
   4   4   7    8.58    2.21   1 
   4  -4   8   35.83    2.91   1 
   4   4   8   37.17    2.91   1 
   4  -4   9   18.44    2.92   1 
   4   4   9   20.74    3.10   1 
   4  -4  10   24.12    3.52   1 
   4   4  10   20.81    2.58   1 
   4  -4  11   36.20    3.25   1 
   4   4  11   32.82    3.14   1 
   4  -4  12    1.20    2.22   1 
   4   4  12    1.54    2.47   1 
   4  -4  13    8.55    2.87   1 
   4   4  13   10.78    3.02   1 
   4  -4  14   -0.19    2.77   1 
   4   4  14    1.97    2.75   1 
   4  -4  15   20.06    3.94   1 
  -4  -5  14   -1.02    1.99   1 
  -4  -5  13    0.23    2.01   1 
  -4  -5  12   41.90    3.06   1 
   4  -5 -11    0.42    1.21   1 
   4   5 -11   -0.30    2.47   1 
   4  -5 -10    5.78    1.57   1 
   4   5 -10    4.20    2.47   1 
   4  -5  -9    1.59    1.27   1 
   4   5  -9   -0.46    2.16   1 
   4  -5  -8  108.33    3.50   1 
   4   5  -8  109.66    4.83   1 
   4  -5  -7    2.54    1.28   1 
   4   5  -7    1.22    1.90   1 
   4  -5  -6   91.67    3.31   1 
   4   5  -6  102.85    4.52   1 
   4  -5  -5    1.49    1.16   1 
   4   5  -5   -0.33    1.69   1 
   4  -5  -4   63.57    2.80   1 
   4   5  -4   55.82    3.51   1 
   4  -5  -3   36.26    2.31   1 
   4   5  -3   40.92    2.89   1 
   4  -5  -2    5.84    1.44   1 
   4   5  -2    5.92    1.94   1 
   4  -5  -1   64.02    2.93   1 
   4   5  -1   67.47    3.62   1 
   4  -5   0    3.92    1.50   1 
   4   5   0    3.76    1.74   1 
   4  -5   1   -0.68    1.10   1 
   4   5   1   -0.85    1.32   1 
   4  -5   2   73.49    3.47   1 
   4   5   2   71.22    3.64   1 
   4  -5   3    6.21    1.87   1 
   4   5   3    3.37    1.75   1 
   4  -5   4   -0.15    1.28   1 
   4   5   4    1.12    1.56   1 
   4  -5   5    6.07    1.89   1 
   4   5   5    4.61    1.90   1 
   4  -5   6   79.08    3.94   1 
   4   5   6   81.39    4.03   1 
   4  -5   7    0.06    1.53   1 
   4   5   7    0.83    1.75   1 
   4  -5   8   21.00    3.17   1 
   4   5   8   19.35    3.07   1 
   4  -5   9    0.93    1.87   1 
   4   5   9    2.23    1.99   1 
   4  -5  10   23.67    3.53   1 
   4   5  10   20.96    3.32   1 
   4  -5  11    6.63    2.52   1 
   4   5  11    4.71    2.48   1 
   4  -5  12   37.87    3.55   1 
   4   5  12   41.43    3.63   1 
   4  -5  13    1.06    2.40   1 
   4   5  13   -1.33    2.45   1 
   4  -5  14   -3.04    2.45   1 
   4   5  14    1.82    3.04   1 
   4  -5  15   -0.76    2.81   1 
  -4  -6  14    0.98    2.21   1 
  -4  -6  13   -1.88    2.21   1 
   4  -6 -11    4.33    1.77   1 
   4   6 -11    4.94    2.87   1 
   4  -6 -10   11.38    2.12   1 
   4   6 -10   14.39    3.49   1 
   4  -6  -9   -0.37    1.39   1 
   4   6  -9    0.92    2.53   1 
   4  -6  -8    0.20    1.37   1 
   4   6  -8    0.11    2.29   1 
   4  -6  -7   78.42    3.35   1 
   4   6  -7   79.88    4.51   1 
   4  -6  -6    7.70    1.76   1 
   4   6  -6    8.13    2.72   1 
   4  -6  -5   17.48    1.79   1 
   4   6  -5   22.74    3.43   1 
   4  -6  -4   15.42    2.29   1 
   4   6  -4   16.35    2.92   1 
   4  -6  -3   26.41    2.20   1 
   4   6  -3   21.49    2.59   1 
   4  -6  -2    4.99    1.59   1 
   4   6  -2    1.41    1.65   1 
   4  -6  -1   -0.09    1.21   1 
   4   6  -1    0.46    1.68   1 
   4  -6   0   14.88    2.36   1 
   4   6   0   17.62    2.85   1 
   4  -6   1   76.88    3.60   1 
   4   6   1   78.58    4.20   1 
   4  -6   2    4.58    1.86   1 
   4   6   2    1.65    1.80   1 
   4  -6   3   25.18    2.35   1 
   4   6   3   25.16    2.56   1 
   4  -6   4   14.55    2.68   1 
   4   6   4   13.54    2.70   1 
   4  -6   5   -0.15    1.54   1 
   4   6   5   -0.73    1.69   1 
   4  -6   6    4.80    2.01   1 
   4   6   6    3.34    1.92   1 
   4  -6   7   33.23    3.00   1 
   4   6   7   36.98    3.10   1 
   4  -6   8   11.90    2.65   1 
   4   6   8   12.55    2.85   1 
   4  -6   9   -0.40    1.94   1 
   4   6   9   -0.02    2.15   1 
   4  -6  10   31.07    3.27   1 
   4   6  10   31.15    3.18   1 
   4  -6  11   20.87    3.69   1 
   4   6  11   24.91    3.92   1 
   4  -6  12   -0.43    2.29   1 
   4   6  12    3.33    3.00   1 
   4  -6  13    4.62    2.75   1 
   4   6  13    6.06    3.14   1 
   4  -6  14    4.89    2.90   1 
   4   6  14    3.40    3.10   1 
   4  -6  15    3.07    3.16   1 
   4  -6  16   -0.06    2.96   1 
  -4  -7  14   19.39    3.80   1 
  -4  -7  13    2.44    2.62   1 
   4  -7 -12    1.62    1.89   1 
   4   7 -12   -0.26    3.01   1 
   4  -7 -11    3.41    1.89   1 
   4   7 -11    3.35    3.06   1 
   4  -7 -10   15.03    2.42   1 
   4   7 -10   14.25    3.49   1 
   4   7  -9   10.65    3.31   1 
   4   7  -8   -1.75    2.50   1 
   4   7  -7   -1.95    2.22   1 
   4  -7  -6   14.03    2.36   1 
   4   7  -6    9.60    2.71   1 
   4  -7  -5   56.30    3.10   1 
   4   7  -5   54.74    3.88   1 
   4  -7  -4    0.85    1.47   1 
   4   7  -4   -0.69    1.91   1 
   4  -7  -3   25.87    2.32   1 
   4   7  -3   23.26    2.83   1 
   4  -7  -2   29.28    2.55   1 
   4   7  -2   24.42    2.81   1 
   4  -7  -1   44.07    3.01   1 
   4   7  -1   39.91    3.31   1 
   4  -7   0   11.75    2.26   1 
   4   7   0   10.42    2.59   1 
   4  -7   1  106.13    4.69   1 
   4   7   1  101.44    4.91   1 
   4  -7   2  112.64    4.69   1 
   4   7   2  109.89    5.11   1 
   4  -7   3   39.98    3.18   1 
   4   7   3   42.06    3.45   1 
   4  -7   4   12.44    2.66   1 
   4   7   4   11.75    2.78   1 
   4  -7   5   59.83    3.84   1 
   4   7   5   62.01    4.10   1 
   4  -7   6   11.85    2.81   1 
   4   7   6    9.96    2.68   1 
   4  -7   7   19.36    3.33   1 
   4   7   7   19.82    3.35   1 
   4  -7   8   -0.22    1.97   1 
   4   7   8   -0.08    2.07   1 
   4  -7   9   25.85    3.06   1 
   4   7   9   25.12    2.97   1 
   4  -7  10   32.18    4.43   1 
   4   7  10   30.48    4.36   1 
   4  -7  11    1.03    2.40   1 
   4   7  11    0.47    2.63   1 
   4  -7  12    7.07    2.79   1 
   4   7  12    7.44    3.28   1 
   4  -7  13   16.75    3.90   1 
   4   7  13   21.15    4.43   1 
   4  -7  14   -1.06    2.62   1 
   4   7  14    2.04    3.73   1 
   4  -7  15   -1.40    2.78   1 
   4  -7  16   -0.16    3.09   1 
  -4  -8  14   25.28    4.53   1 
  -4  -8  13   -0.29    2.77   1 
   4  -8 -12    1.26    2.17   1 
   4   8 -12    1.86    3.46   1 
   4   8 -11   10.72    3.77   1 
   4   8 -10    3.17    3.14   1 
   4   8  -9    1.94    2.98   1 
  -4   8   8   29.22    3.81   1 
   4   8  -8   32.57    4.70   1 
  -4   8   7   24.54    2.74   1 
   4   8  -7   17.87    4.01   1 
  -4   8   6   33.30    2.93   1 
   4   8  -6   37.27    3.78   1 
   4   8  -5    2.08    2.50   1 
   4  -8  -4   26.89    2.53   1 
   4   8  -4   25.87    3.07   1 
   4   8  -3   -0.29    2.12   1 
   4  -8  -2   28.07    2.61   1 
   4   8  -2   23.74    2.92   1 
   4  -8  -1   12.51    2.55   1 
   4   8  -1    6.07    2.39   1 
   4  -8   0   75.02    4.18   1 
   4   8   0   67.36    4.35   1 
   4  -8   1   15.31    2.84   1 
   4   8   1    6.14    2.52   1 
   4  -8   2   11.26    2.67   1 
   4   8   2   11.87    2.91   1 
   4  -8   3   19.37    3.05   1 
   4   8   3   18.53    3.30   1 
   4  -8   4   21.91    3.43   1 
   4   8   4   18.79    3.44   1 
   4  -8   5    1.19    2.03   1 
   4   8   5    0.05    1.97   1 
   4  -8   6    0.64    1.94   1 
   4   8   6   -1.25    2.10   1 
   4  -8   7    3.78    2.46   1 
   4   8   7    4.10    2.60   1 
   4  -8   8   49.04    4.06   1 
   4   8   8   48.66    4.11   1 
   4  -8   9   11.86    3.30   1 
   4   8   9   11.32    3.29   1 
   4  -8  10    5.59    3.02   1 
   4   8  10    7.41    3.16   1 
   4  -8  11   31.50    3.69   1 
   4   8  11   32.75    3.82   1 
   4  -8  12   -1.42    2.60   1 
   4   8  12   -0.13    3.04   1 
   4  -8  13    0.62    2.86   1 
   4   8  13    0.08    3.16   1 
   4  -8  14    4.31    3.37   1 
   4   8  14    3.98    3.52   1 
   4  -8  15    3.67    3.28   1 
   4  -8  16    1.50    3.52   1 
  -4  -9  14    1.45    3.44   1 
  -4  -9  13    9.60    3.58   1 
   4   9 -12   -1.55    3.69   1 
   4   9 -11    2.46    3.40   1 
  -4   9  10    8.22    3.08   1 
   4   9 -10   12.37    4.01   1 
  -4   9   9    9.26    3.05   1 
   4   9  -9    4.44    3.45   1 
  -4   9   8   46.49    3.84   1 
   4   9  -8   54.65    5.04   1 
  -4   9   7   19.04    3.40   1 
   4   9  -7   17.99    4.36   1 
  -4   9   6   68.12    4.39   1 
   4   9  -6   76.24    5.31   1 
  -4   9   5    3.11    2.22   1 
   4   9  -5    1.62    2.62   1 
   4   9  -4    0.25    2.49   1 
   4  -9  -3    3.52    1.81   1 
   4   9  -3    0.12    2.27   1 
   4  -9  -2   34.57    3.07   1 
   4   9  -2   29.06    3.45   1 
   4  -9  -1   32.48    2.99   1 
   4   9  -1   27.50    3.19   1 
   4  -9   0   21.21    3.44   1 
   4   9   0   18.12    3.69   1 
   4  -9   1   18.79    3.34   1 
   4   9   1   15.64    3.45   1 
   4  -9   2   85.52    4.74   1 
   4   9   2   84.78    5.16   1 
   4  -9   3    9.05    2.73   1 
   4   9   3    4.77    2.62   1 
   4  -9   4    1.27    1.90   1 
   4   9   4   -0.03    2.24   1 
   4  -9   5    1.08    2.27   1 
   4   9   5   -1.90    2.06   1 
   4  -9   6   29.64    3.36   1 
   4   9   6   33.27    3.52   1 
   4  -9   7    3.76    2.71   1 
   4   9   7    2.84    2.61   1 
   4  -9   8    8.88    3.39   1 
   4   9   8    7.85    3.15   1 
   4  -9   9   -0.99    2.39   1 
   4   9   9    0.09    2.85   1 
   4  -9  10   13.56    3.73   1 
   4   9  10   14.08    3.76   1 
   4  -9  11   -0.19    2.75   1 
   4   9  11   -3.70    2.86   1 
   4  -9  12    0.51    2.96   1 
   4   9  12    2.10    3.34   1 
   4  -9  13    6.02    3.67   1 
   4   9  13    6.34    3.91   1 
   4  -9  14    2.50    3.46   1 
   4   9  14    1.33    4.21   1 
   4  -9  15    0.91    3.67   1 
   4  -9  16   -0.80    3.61   1 
  -4 -10  14    7.66    4.25   1 
  -4 -10  13    0.55    3.20   1 
   4  10 -12    5.88    4.41   1 
   4  10 -11    4.79    3.90   1 
  -4  10  10   28.70    4.77   1 
   4  10 -10   20.74    4.70   1 
  -4  10   9    3.44    2.84   1 
   4  10  -9    7.08    3.76   1 
  -4  10   8   26.86    3.26   1 
   4  10  -8   26.46    5.20   1 
  -4  10   7   26.03    3.18   1 
   4  10  -7   41.48    5.88   1 
  -4  10   6   30.20    4.43   1 
   4  10  -6   28.82    4.99   1 
  -4  10   5    4.89    2.85   1 
   4  10  -5    5.63    3.19   1 
  -4  10   4   40.54    3.71   1 
   4  10  -4   44.69    4.35   1 
   4 -10  -3    3.63    2.16   1 
   4  10  -3    4.08    2.65   1 
   4 -10  -2    6.15    2.48   1 
   4  10  -2    0.91    2.52   1 
   4 -10  -1    2.31    2.03   1 
   4  10  -1    0.18    2.42   1 
   4 -10   0   56.72    4.09   1 
   4  10   0   57.18    4.52   1 
   4 -10   1    4.09    2.34   1 
   4  10   1    4.55    2.64   1 
   4 -10   2    3.55    2.47   1 
   4  10   2    3.76    2.70   1 
   4 -10   3   24.65    4.03   1 
   4  10   3   17.75    3.66   1 
   4 -10   4   28.88    3.30   1 
   4  10   4   29.31    4.55   1 
   4 -10   5    1.57    2.49   1 
   4  10   5   -1.74    2.50   1 
   4 -10   6    9.33    3.30   1 
   4  10   6    9.21    3.30   1 
   4 -10   7   -1.39    2.28   1 
   4  10   7    1.15    2.75   1 
   4 -10   8   15.53    3.95   1 
   4  10   8   15.55    3.95   1 
   4 -10   9   -0.53    2.82   1 
   4  10   9   -0.46    2.85   1 
   4 -10  10   -2.82    2.85   1 
   4  10  10   -0.50    2.95   1 
   4 -10  11    8.62    3.85   1 
   4  10  11    8.31    3.70   1 
   4 -10  12    0.36    3.48   1 
   4  10  12    5.42    3.91   1 
   4 -10  13    1.40    3.70   1 
   4  10  13    1.91    4.03   1 
   4 -10  14    0.28    3.65   1 
   4 -10  15    0.40    3.73   1 
   4 -10  16   -2.15    4.02   1 
  -4 -11  15   30.49    5.81   1 
  -4 -11  14    7.06    4.45   1 
  -4 -11  13    2.10    3.66   1 
   4  11 -12    2.45    4.76   1 
   4  11 -11    1.15    4.24   1 
  -4  11  10    1.28    3.44   1 
   4  11 -10   -1.47    3.79   1 
  -4  11   9   15.45    4.17   1 
   4  11  -9   13.03    4.74   1 
  -4  11   8   12.20    3.64   1 
   4  11  -8   12.76    4.34   1 
  -4  11   7    1.76    2.66   1 
   4  11  -7    2.85    3.70   1 
  -4  11   6   14.34    3.64   1 
   4  11  -6   12.50    4.28   1 
  -4  11   5    4.70    2.81   1 
   4  11  -5   -0.81    3.02   1 
  -4  11   4    5.36    2.82   1 
   4  11  -4    5.71    3.31   1 
   4 -11  -3   10.48    3.16   1 
   4  11  -3    9.53    3.70   1 
   4 -11  -2   20.06    3.58   1 
   4  11  -2   14.83    3.81   1 
   4 -11  -1   30.12    3.28   1 
   4  11  -1   35.28    5.33   1 
   4 -11   0   11.95    3.05   1 
   4  11   0    8.93    3.31   1 
   4 -11   1   10.49    3.23   1 
   4  11   1    6.74    3.40   1 
   4 -11   2    9.82    3.11   1 
   4  11   2   12.37    3.70   1 
   4 -11   3    5.19    2.75   1 
   4  11   3    0.75    2.49   1 
   4 -11   4    2.04    2.63   1 
   4  11   4    3.14    2.80   1 
   4 -11   5   -2.19    2.07   1 
   4  11   5   -1.36    2.64   1 
   4 -11   6   13.51    3.81   1 
   4  11   6    8.55    3.40   1 
   4 -11   7    5.07    3.38   1 
   4  11   7    3.47    3.28   1 
   4 -11   8   -1.03    2.88   1 
   4  11   8    2.04    3.33   1 
   4 -11   9   14.91    4.42   1 
   4  11   9    6.02    3.76   1 
   4 -11  10   -2.82    3.11   1 
   4  11  10   -1.69    3.45   1 
   4 -11  11    4.72    3.90   1 
   4  11  11    4.49    3.89   1 
   4 -11  12    1.55    3.82   1 
   4  11  12   -0.04    3.60   1 
   4 -11  13    2.32    4.04   1 
   4  11  13    2.38    4.31   1 
   4 -11  14   -2.12    4.08   1 
   4 -11  15    0.59    4.83   1 
   4 -11  16   -0.62    4.44   1 
  -4 -12  15    0.73    4.46   1 
  -4 -12  14    3.07    4.62   1 
  -4 -12  13    7.98    4.32   1 
   4  12 -12   -3.17    4.42   1 
   4  12 -11    2.45    4.74   1 
  -4  12  10    5.90    3.90   1 
   4  12 -10    9.86    5.04   1 
  -4  12   9    1.55    3.53   1 
   4  12  -9    1.19    4.04   1 
  -4  12   8    2.63    3.50   1 
   4  12  -8    3.73    4.02   1 
  -4  12   7   16.96    4.32   1 
   4  12  -7   15.05    4.97   1 
  -4  12   6    2.02    3.17   1 
   4  12  -6    3.99    4.01   1 
  -4  12   5   -0.07    2.89   1 
   4  12  -5   -1.68    3.33   1 
   4  12  -4    2.04    3.42   1 
   4 -12  -3   19.99    3.83   1 
   4  12  -3   12.92    4.07   1 
   4 -12  -2   -2.26    2.15   1 
   4  12  -2   -0.50    2.95   1 
   4 -12  -1   12.34    3.31   1 
   4  12  -1   10.81    3.53   1 
   4 -12   0    8.31    3.04   1 
   4  12   0    7.15    3.40   1 
   4 -12   1   64.28    5.03   1 
   4  12   1   57.34    5.30   1 
   4 -12   2   20.51    4.34   1 
   4  12   2   18.20    4.26   1 
   4 -12   3    8.09    3.17   1 
   4  12   3    8.15    3.56   1 
   4 -12   4    0.71    2.79   1 
   4  12   4    1.98    3.25   1 
   4 -12   5    0.90    2.67   1 
   4  12   5    0.75    3.06   1 
   4 -12   6   -0.52    2.81   1 
   4  12   6   -0.43    3.15   1 
   4 -12   7   11.44    4.01   1 
   4  12   7    6.46    3.56   1 
   4 -12   8    5.74    3.48   1 
   4  12   8    1.73    3.26   1 
   4 -12   9    0.63    3.49   1 
   4  12   9    2.95    3.53   1 
   4 -12  10    6.21    4.22   1 
   4  12  10    8.63    4.35   1 
   4 -12  11   12.31    4.85   1 
   4  12  11   12.97    4.89   1 
   4 -12  12   -0.51    4.08   1 
   4  12  12    2.83    4.65   1 
   4 -12  13   -2.71    4.10   1 
   4  12  13    1.38    4.68   1 
   4 -12  14    4.79    4.73   1 
   4 -12  15    0.82    4.62   1 
   4 -12  16    2.18    5.25   1 
  -4 -13  15    1.54    4.98   1 
  -4 -13  14    5.73    5.07   1 
  -4 -13  13    0.94    4.16   1 
   4  13 -12   -0.88    4.73   1 
   4  13 -11    4.76    5.43   1 
   4  13 -10    0.68    4.46   1 
  -4  13   9   -1.14    3.78   1 
   4  13  -9    1.65    4.17   1 
  -4  13   8    8.29    4.24   1 
   4  13  -8    7.49    5.06   1 
  -4  13   7    3.95    3.61   1 
   4  13  -7    0.78    4.08   1 
  -4  13   6   36.06    4.42   1 
   4  13  -6   44.39    7.01   1 
   4  13  -5   13.67    4.74   1 
   4 -13  -4    1.10    2.78   1 
   4  13  -4    0.86    3.73   1 
   4 -13  -3    0.15    2.36   1 
   4  13  -3    2.26    3.56   1 
   4 -13  -2   29.11    4.64   1 
   4  13  -2   27.99    5.47   1 
   4 -13  -1    6.92    3.10   1 
   4  13  -1   12.06    4.15   1 
   4 -13   0    1.97    2.85   1 
   4  13   0    0.35    3.21   1 
   4 -13   1   10.50    3.57   1 
   4  13   1   10.49    3.93   1 
   4 -13   2   60.83    5.18   1 
   4  13   2   47.75    4.83   1 
   4 -13   3   17.71    4.07   1 
   4  13   3   15.06    4.42   1 
   4 -13   4    6.34    3.46   1 
   4  13   4    2.26    3.70   1 
   4 -13   5    2.09    2.87   1 
   4  13   5    3.01    3.58   1 
   4 -13   6   24.50    4.83   1 
   4  13   6   14.76    4.46   1 
   4 -13   7    0.78    3.37   1 
   4  13   7    0.20    3.31   1 
   4 -13   8    1.82    3.68   1 
   4  13   8    3.23    3.65   1 
   4 -13   9    7.67    4.35   1 
   4  13   9    1.54    3.84   1 
   4 -13  10   12.68    5.11   1 
   4  13  10   13.16    4.80   1 
   4 -13  11    0.18    4.32   1 
   4  13  11    0.94    4.12   1 
   4 -13  12   -1.06    4.30   1 
   4  13  12    0.37    4.56   1 
   4 -13  13    0.17    4.60   1 
   4  13  13   -1.52    5.00   1 
   4 -13  14    2.26    5.25   1 
   4 -13  15    1.35    5.47   1 
  -4 -14  15   -1.28    5.24   1 
  -4 -14  14    6.22    5.50   1 
  -4 -14  13   -1.40    4.44   1 
   4  14 -12    4.48    6.07   1 
   4 -14 -11    2.33    3.74   1 
   4  14 -11    2.24    6.10   1 
   4 -14 -10    4.19    3.84   1 
   4  14 -10    4.74    5.41   1 
   4  14  -9   -0.19    4.57   1 
   4  14  -8   11.08    5.28   1 
   4  14  -7    1.71    4.75   1 
   4  14  -6    1.04    4.05   1 
   4 -14  -5   -1.90    2.82   1 
   4  14  -5    1.34    4.36   1 
   4 -14  -4   30.74    5.06   1 
   4  14  -4   32.14    6.46   1 
   4 -14  -3    2.90    2.90   1 
   4  14  -3   -1.63    3.70   1 
   4 -14  -2    4.54    3.22   1 
   4  14  -2    7.22    4.16   1 
   4 -14  -1    5.81    3.11   1 
   4  14  -1    3.98    3.81   1 
   4 -14   0   48.42    4.83   1 
   4  14   0   41.59    5.06   1 
   4 -14   1    4.02    3.30   1 
   4  14   1    2.57    3.71   1 
   4 -14   2    3.80    3.42   1 
   4  14   2    7.57    4.14   1 
   4 -14   3    4.88    3.32   1 
   4  14   3    2.32    3.29   1 
   4 -14   4   40.65    4.77   1 
   4  14   4   38.60    4.79   1 
   4 -14   5    1.57    3.13   1 
   4  14   5    2.67    3.67   1 
   4 -14   6    0.34    3.19   1 
   4  14   6    2.55    3.80   1 
   4 -14   7    1.90    3.73   1 
   4  14   7    4.12    4.03   1 
   4 -14   8   24.62    5.52   1 
   4  14   8   16.42    5.17   1 
   4 -14   9   -1.74    3.90   1 
   4  14   9   -2.91    3.89   1 
   4 -14  10    3.48    4.43   1 
   4  14  10    3.36    4.58   1 
   4 -14  11    6.69    5.01   1 
   4  14  11    2.02    4.63   1 
   4 -14  12    3.05    5.03   1 
   4  14  12    4.52    4.89   1 
   4 -14  13   -2.26    4.79   1 
   4  14  13   -0.91    5.12   1 
   4 -14  14    0.12    5.33   1 
  -4 -15  14    1.96    5.80   1 
  -4 -15  13    3.86    5.02   1 
   4 -15 -11    4.68    4.62   1 
   4  15 -11    4.35    6.00   1 
   4 -15 -10    0.33    3.89   1 
   4  15 -10   -3.27    5.45   1 
   4 -15  -9    3.77    3.98   1 
   4  15  -9   -0.69    5.05   1 
   4 -15  -8    8.79    4.16   1 
   4  15  -8    6.92    5.09   1 
   4 -15  -7    0.02    3.31   1 
   4  15  -7   -2.27    4.54   1 
   4 -15  -6   19.46    4.67   1 
   4  15  -6   14.72    5.61   1 
   4 -15  -5    4.91    3.44   1 
   4  15  -5    1.43    4.38   1 
   4 -15  -4    4.35    3.59   1 
   4  15  -4    5.58    4.58   1 
   4 -15  -3   -0.54    2.98   1 
   4  15  -3   -0.34    4.26   1 
   4 -15  -2   15.81    4.25   1 
   4  15  -2   13.09    5.01   1 
   4 -15  -1    3.12    3.24   1 
   4  15  -1    5.60    4.47   1 
   4 -15   0    4.68    3.59   1 
   4  15   0    3.00    4.25   1 
   4 -15   1   10.37    3.97   1 
   4  15   1    8.09    4.43   1 
   4 -15   2   40.45    6.07   1 
   4  15   2   35.14    6.33   1 
   4 -15   3    6.73    3.68   1 
   4  15   3    2.89    3.76   1 
   4 -15   4   -0.13    3.40   1 
   4  15   4   -1.03    3.53   1 
   4 -15   5    7.20    3.74   1 
   4  15   5    2.41    4.00   1 
   4 -15   6   16.65    4.64   1 
   4  15   6   14.71    5.20   1 
   4 -15   7    3.27    4.26   1 
   4  15   7    1.38    4.33   1 
   4 -15   8    4.90    4.47   1 
   4  15   8    3.64    4.89   1 
   4 -15   9   34.83    6.81   1 
   4  15   9   26.59    6.41   1 
   4 -15  10    3.07    4.73   1 
   4  15  10    3.66    5.16   1 
   4 -15  11    0.86    4.94   1 
   4  15  11    0.79    5.27   1 
   4 -15  12   -0.84    5.20   1 
   4  15  12   -4.62    5.21   1 
  -4 -16  12    0.94    5.19   1 
   4  16 -11    0.39    5.98   1 
   4 -16 -10   -1.86    4.54   1 
   4  16 -10   -2.89    6.16   1 
   4 -16  -9    6.90    5.08   1 
   4  16  -9    7.58    6.05   1 
   4 -16  -8    0.98    4.12   1 
   4  16  -8   -1.84    5.34   1 
   4 -16  -7   13.29    4.91   1 
   4  16  -7   10.52    5.82   1 
   4 -16  -6    0.68    3.77   1 
   4  16  -6   -4.19    5.00   1 
   4 -16  -5   -3.01    3.38   1 
   4  16  -5   -1.00    4.84   1 
   4 -16  -4    2.93    3.49   1 
   4  16  -4    0.55    4.62   1 
   4 -16  -3    0.99    3.19   1 
   4  16  -3    0.60    4.22   1 
   4 -16  -2    0.44    3.46   1 
   4  16  -2   -1.10    4.66   1 
   4 -16  -1   -0.38    3.43   1 
   4  16  -1   -3.22    4.10   1 
   4 -16   0    9.64    4.25   1 
   4  16   0    9.48    4.75   1 
   4 -16   1   20.21    5.02   1 
   4  16   1   13.73    5.31   1 
   4 -16   2    2.12    3.41   1 
   4  16   2    0.09    4.17   1 
   4 -16   3    1.79    3.64   1 
   4  16   3    7.46    4.86   1 
   4 -16   4    5.76    4.14   1 
   4  16   4    2.18    4.20   1 
   4 -16   5    0.18    3.71   1 
   4  16   5    1.05    4.30   1 
   4 -16   6   -0.01    3.89   1 
   4  16   6    1.91    4.74   1 
   4 -16   7    2.13    4.53   1 
   4  16   7    0.62    4.72   1 
   4 -16   8    0.55    4.54   1 
   4  16   8   -0.10    4.70   1 
   4 -16   9   -1.10    4.32   1 
   4  16   9   -1.88    4.85   1 
   4 -16  10   -3.05    4.83   1 
   4  16  10    8.13    5.92   1 
   4 -17 -10    1.29    4.78   1 
   4  17 -10    1.02    6.39   1 
   4 -17  -9   -2.27    4.40   1 
   4  17  -9   -1.73    6.58   1 
   4 -17  -8    6.49    4.58   1 
   4  17  -8    7.61    6.36   1 
   4 -17  -7   -1.35    3.84   1 
   4  17  -7    0.74    5.37   1 
   4 -17  -6   -2.81    3.85   1 
   4  17  -6   -1.34    4.94   1 
   4 -17  -5    6.97    4.04   1 
   4  17  -5    3.42    5.77   1 
   4 -17  -4   -1.32    3.35   1 
   4  17  -4   -2.93    5.19   1 
   4 -17  -3   -0.57    3.31   1 
   4  17  -3   -4.97    4.49   1 
   4 -17  -2    1.70    3.89   1 
   4  17  -2   -2.18    4.66   1 
   4 -17  -1   12.71    4.81   1 
   4  17  -1    6.02    5.40   1 
   4 -17   0   -1.25    3.44   1 
   4  17   0    0.12    4.54   1 
   4 -17   1    2.51    3.97   1 
   4  17   1   -0.41    4.61   1 
   4 -17   2    3.04    3.93   1 
   4  17   2    3.27    4.85   1 
   4 -17   3    2.87    3.80   1 
   4  17   3    3.02    4.74   1 
   4 -17   4    1.70    4.06   1 
   4  17   4   -0.72    4.60   1 
   4 -17   5    0.46    3.57   1 
   4  17   5    0.00    4.93   1 
   4 -17   6   -0.20    4.29   1 
   4  17   6   -2.84    4.77   1 
   4 -17   7    0.37    4.69   1 
   4  17   7    5.22    5.49   1 
   4 -17   8    0.87    4.89   1 
   4  17   8    1.89    5.29   1 
   4 -18  -7    0.05    4.60   1 
   4  18  -7   -0.10    5.99   1 
   4 -18  -6    8.22    5.19   1 
   4  18  -6    2.38    6.12   1 
   4 -18  -5    0.64    4.56   1 
   4  18  -5   -0.89    5.17   1 
   4 -18  -4    2.66    4.46   1 
   4  18  -4    0.52    5.05   1 
   4 -18  -3    0.26    4.32   1 
   4  18  -3    0.49    5.91   1 
   4 -18  -2    1.85    4.32   1 
   4  18  -2    1.00    5.14   1 
   4 -18  -1    0.70    4.13   1 
   4  18  -1    1.97    5.20   1 
   4 -18   0    0.94    4.19   1 
   4  18   0    1.13    4.84   1 
   4 -18   1   -0.67    3.98   1 
   4  18   1   -1.53    5.23   1 
   4 -18   2    1.17    4.30   1 
   4  18   2   -1.00    4.94   1 
   4 -18   3   -1.36    4.19   1 
   4  18   3   -1.32    5.18   1 
   4 -18   4    4.05    4.68   1 
   4  18   4    5.75    5.85   1 
   4 -18   5   -0.52    4.13   1 
   4  18   5   -0.63    5.31   1 
   5   0  -6  147.37    3.40   1 
   5   0  -5    0.12    0.92   1 
   5   0  -4   21.01    1.54   1 
   5   0  -3    1.17    0.92   1 
   5   0  -2   22.50    1.57   1 
   5   0  -1    0.27    0.88   1 
   5   0   0  441.33    7.27   1 
   5   0   1    2.08    1.11   1 
   5   0   2  177.44    4.91   1 
   5   0   3   17.57    1.82   1 
   5   0   4   20.09    1.97   1 
   5   0   5    1.75    1.36   1 
   5   0   6   90.45    4.01   1 
   5   0   7   -0.23    1.49   1 
   5   0   8    1.02    1.74   1 
   5   0   9   -0.18    1.93   1 
   5   0  10   70.19    4.24   1 
   5   0  11   -0.76    2.37   1 
   5   0  12   34.64    3.51   1 
   5   0  13    4.63    2.82   1 
   5   0  14   -0.50    2.84   1 
   5   0  15   -1.19    3.04   1 
   5   1  -8   14.48    1.47   1 
   5   1  -7   35.30    1.97   1 
   5  -1  -6   18.02    1.33   1 
   5   1  -6   21.90    1.64   1 
   5  -1  -5    3.82    1.00   1 
   5   1  -5    3.95    1.25   1 
   5  -1  -4   76.39    2.51   1 
   5   1  -4   84.98    2.95   1 
   5  -1  -3   12.71    1.61   1 
   5   1  -3   12.67    1.72   1 
   5  -1  -2   53.57    2.33   1 
   5   1  -2   53.72    2.46   1 
   5  -1  -1    6.22    1.36   1 
   5   1  -1    7.24    1.47   1 
   5  -1   0    5.69    1.44   1 
   5   1   0    5.46    1.43   1 
   5  -1   1   12.98    1.95   1 
   5   1   1   11.52    1.94   1 
   5  -1   2    3.98    1.37   1 
   5   1   2    6.74    1.66   1 
   5  -1   3   82.48    3.47   1 
   5   1   3   82.63    3.58   1 
   5  -1   4    9.29    1.94   1 
   5   1   4    8.07    1.99   1 
   5  -1   5   43.43    2.79   1 
   5   1   5   44.66    2.91   1 
   5  -1   6    0.55    1.32   1 
   5   1   6    0.42    1.54   1 
   5  -1   7   38.58    2.85   1 
   5   1   7   39.29    2.96   1 
   5  -1   8   19.97    2.39   1 
   5   1   8   21.45    2.49   1 
   5  -1   9   41.56    3.28   1 
   5   1   9   38.31    3.05   1 
   5  -1  10   28.91    2.99   1 
   5   1  10   26.17    3.01   1 
   5  -1  11   68.73    4.30   1 
   5   1  11   65.72    4.17   1 
   5  -1  12   22.94    3.90   1 
   5   1  12   20.58    3.71   1 
   5  -1  13   10.44    3.31   1 
   5   1  13   15.52    3.58   1 
   5  -1  14   10.14    3.49   1 
   5   1  14    9.32    3.11   1 
   5  -1  15   18.21    4.17   1 
   5   1  15   17.10    3.81   1 
   5   2  -9   71.55    2.93   1 
   5   2  -8    1.99    1.62   1 
   5  -2  -7    3.08    1.05   1 
   5   2  -7    3.56    1.62   1 
   5  -2  -6   19.68    1.41   1 
   5   2  -6   23.94    1.96   1 
   5  -2  -5   61.23    2.30   1 
   5   2  -5   59.07    2.71   1 
   5  -2  -4   10.35    1.45   1 
   5   2  -4   10.47    1.78   1 
   5  -2  -3    0.34    0.91   1 
   5   2  -3    0.55    1.02   1 
   5  -2  -2   93.84    3.14   1 
   5   2  -2   96.77    3.54   1 
   5  -2  -1  240.32    5.22   1 
   5   2  -1  223.57    5.43   1 
   5  -2   0   39.74    2.27   1 
   5   2   0   41.86    2.48   1 
   5  -2   1   17.92    1.68   1 
   5   2   1   16.92    1.79   1 
   5  -2   2    4.18    1.47   1 
   5   2   2    4.96    1.49   1 
   5  -2   3   24.45    2.03   1 
   5   2   3   26.14    2.21   1 
   5  -2   4   63.11    3.21   1 
   5   2   4   60.63    3.26   1 
   5  -2   5   42.89    2.80   1 
   5   2   5   39.93    2.83   1 
   5  -2   6    9.21    2.03   1 
   5   2   6   11.15    2.33   1 
   5  -2   7   32.83    2.79   1 
   5   2   7   33.60    2.84   1 
   5  -2   8   15.72    2.84   1 
   5   2   8   16.31    2.92   1 
   5  -2   9  141.37    5.65   1 
   5   2   9  125.92    5.23   1 
   5  -2  10   16.42    3.04   1 
   5   2  10   15.75    3.00   1 
   5  -2  11   -1.20    2.11   1 
   5   2  11   -1.03    2.19   1 
   5  -2  12   29.66    4.20   1 
   5   2  12   29.16    4.09   1 
   5  -2  13   62.06    4.51   1 
   5   2  13   58.08    4.33   1 
   5  -2  14    3.68    2.85   1 
   5   2  14    4.04    3.01   1 
   5  -2  15    1.24    2.91   1 
   5   2  15    0.59    2.99   1 
   5   3 -11    0.29    1.97   1 
   5   3 -10    1.38    2.14   1 
   5   3  -9    9.09    2.21   1 
   5  -3  -8   12.61    1.64   1 
   5   3  -8   15.70    2.42   1 
   5  -3  -7   77.28    2.54   1 
   5   3  -7   86.76    3.79   1 
   5  -3  -6   28.36    1.74   1 
   5   3  -6   28.34    2.37   1 
   5  -3  -5    3.47    1.16   1 
   5   3  -5    0.64    1.41   1 
   5  -3  -4   25.51    1.69   1 
   5   3  -4   18.85    1.88   1 
   5  -3  -3   16.54    1.47   1 
   5   3  -3   15.10    1.77   1 
   5  -3  -2   38.03    2.10   1 
   5   3  -2   39.21    2.50   1 
   5  -3  -1    3.98    1.32   1 
   5   3  -1    1.79    1.32   1 
   5  -3   0   36.88    2.32   1 
   5   3   0   35.97    2.41   1 
   5  -3   1  123.10    4.06   1 
   5   3   1  116.18    4.15   1 
   5  -3   2   17.99    1.83   1 
   5   3   2   19.09    2.03   1 
   5  -3   3  310.67    6.97   1 
   5   3   3  301.33    7.23   1 
   5  -3   4  117.97    4.42   1 
   5   3   4  122.70    4.67   1 
   5  -3   5    3.53    1.60   1 
   5   3   5    1.92    1.59   1 
   5  -3   6   29.72    2.55   1 
   5   3   6   27.82    2.55   1 
   5  -3   7  106.92    4.60   1 
   5   3   7  111.76    4.85   1 
   5  -3   8   25.20    2.59   1 
   5   3   8   27.55    2.74   1 
   5  -3   9    4.82    2.22   1 
   5   3   9    4.04    2.29   1 
   5  -3  10   15.89    3.17   1 
   5   3  10   14.52    3.02   1 
   5  -3  11  118.53    5.63   1 
   5   3  11  120.93    5.63   1 
   5  -3  12   11.00    3.02   1 
   5   3  12   11.64    3.06   1 
   5  -3  13    2.49    2.45   1 
   5   3  13    2.35    2.61   1 
   5  -3  14    4.68    2.89   1 
   5   3  14    4.52    3.02   1 
   5  -3  15   14.57    3.76   1 
   5   3  15   20.10    4.10   1 
  -5  -4  13   10.93    2.37   1 
   5   4 -12   19.01    3.28   1 
   5   4 -11   25.17    3.46   1 
   5   4 -10    5.80    2.56   1 
   5  -4  -9    0.62    1.17   1 
   5   4  -9   -0.32    2.00   1 
   5  -4  -8  149.75    3.67   1 
   5   4  -8  151.77    5.21   1 
   5  -4  -7    7.10    1.47   1 
   5   4  -7    9.26    2.29   1 
   5  -4  -6  153.10    3.90   1 
   5   4  -6  155.81    5.20   1 
   5  -4  -5   32.42    1.95   1 
   5   4  -5   31.16    2.55   1 
   5  -4  -4   30.25    1.95   1 
   5   4  -4   31.02    2.51   1 
   5  -4  -3   19.15    1.69   1 
   5   4  -3   17.57    2.64   1 
   5  -4  -2   18.76    1.72   1 
   5   4  -2   17.39    2.03   1 
   5  -4  -1   12.55    1.53   1 
   5   4  -1   18.31    2.57   1 
   5  -4   0   32.30    2.23   1 
   5   4   0   26.85    2.29   1 
   5  -4   1  113.83    4.06   1 
   5   4   1  106.44    4.29   1 
   5  -4   2  200.96    5.54   1 
   5   4   2  198.27    5.88   1 
   5  -4   3    9.91    2.02   1 
   5   4   3   10.57    2.20   1 
   5  -4   4    7.47    2.02   1 
   5   4   4    6.37    2.00   1 
   5  -4   5   58.72    3.42   1 
   5   4   5   57.47    3.46   1 
   5  -4   6    1.86    1.65   1 
   5   4   6    3.67    1.91   1 
   5  -4   7    0.86    1.65   1 
   5   4   7    1.51    1.82   1 
   5  -4   8    1.06    1.74   1 
   5   4   8    2.07    1.89   1 
   5  -4   9   41.88    3.31   1 
   5   4   9   41.33    3.35   1 
   5  -4  10   26.94    2.92   1 
   5   4  10   27.09    2.94   1 
   5  -4  11    3.03    2.36   1 
   5   4  11    2.31    2.61   1 
   5  -4  12   24.64    3.95   1 
   5   4  12   25.99    4.02   1 
   5  -4  13    4.08    2.53   1 
   5   4  13    5.18    2.82   1 
   5  -4  14    0.90    2.82   1 
   5   4  14    3.50    2.98   1 
   5  -4  15    0.69    2.90   1 
   5  -4  16   11.21    3.83   1 
  -5  -5  13    0.62    2.00   1 
   5   5 -12    5.05    2.79   1 
   5   5 -11   -1.20    2.59   1 
   5  -5 -10    2.11    1.41   1 
   5   5 -10    3.82    2.61   1 
   5  -5  -9    2.22    1.44   1 
   5   5  -9    3.83    2.41   1 
   5  -5  -8    0.51    1.31   1 
   5   5  -8   -0.75    2.06   1 
   5   5  -7    5.80    2.39   1 
   5  -5  -6   22.84    1.86   1 
   5   5  -6   22.29    2.53   1 
   5  -5  -5   47.67    2.51   1 
   5   5  -5   44.76    3.18   1 
   5  -5  -4   12.20    1.95   1 
   5   5  -4   10.26    2.35   1 
   5  -5  -3   36.96    2.35   1 
   5   5  -3   37.56    2.98   1 
   5  -5  -2    0.12    1.22   1 
   5   5  -2    0.21    1.46   1 
   5  -5  -1    3.96    1.51   1 
   5   5  -1    3.28    1.78   1 
   5  -5   0   45.87    2.80   1 
   5   5   0   48.74    3.18   1 
   5  -5   1   29.32    2.39   1 
   5   5   1   28.84    2.57   1 
   5  -5   2   52.88    3.11   1 
   5   5   2   43.14    3.05   1 
   5  -5   3    5.53    1.85   1 
   5   5   3    5.83    2.04   1 
   5  -5   4   40.60    2.92   1 
   5   5   4   41.30    3.08   1 
   5  -5   5   19.63    2.28   1 
   5   5   5   19.54    2.42   1 
   5  -5   6    4.11    1.90   1 
   5   5   6    6.95    2.32   1 
   5  -5   7   27.25    2.88   1 
   5   5   7   24.49    2.66   1 
   5  -5   8   69.08    4.10   1 
   5   5   8   67.67    4.11   1 
   5  -5   9    1.10    2.02   1 
   5   5   9    0.89    2.07   1 
   5  -5  10   20.66    3.55   1 
   5   5  10   17.97    3.36   1 
   5  -5  11    6.46    2.64   1 
   5   5  11    7.94    2.85   1 
   5  -5  12   10.32    2.96   1 
   5   5  12   10.77    3.32   1 
   5  -5  13    4.50    2.64   1 
   5   5  13    6.10    3.14   1 
   5  -5  14   10.82    3.42   1 
   5   5  14   10.15    3.55   1 
   5  -5  15    2.36    3.17   1 
   5  -5  16    4.56    3.33   1 
  -5  -6  14   16.50    3.32   1 
   5   6 -12   17.29    3.84   1 
   5  -6 -11    2.29    1.67   1 
   5   6 -11    0.09    2.90   1 
   5  -6 -10    1.50    1.71   1 
   5   6 -10   -0.35    2.78   1 
   5  -6  -9   21.80    2.04   1 
   5   6  -9   32.70    4.22   1 
   5  -6  -8    7.85    1.76   1 
   5   6  -8    6.33    2.57   1 
   5  -6  -7    1.44    1.34   1 
   5   6  -7   -1.81    1.96   1 
   5  -6  -6    4.50    1.47   1 
   5   6  -6    4.38    2.34   1 
   5  -6  -5   57.75    2.90   1 
   5   6  -5   60.13    4.02   1 
   5  -6  -4   12.53    2.11   1 
   5   6  -4    7.26    2.40   1 
   5  -6  -3    3.87    1.63   1 
   5   6  -3    2.39    1.91   1 
   5  -6  -2    1.25    1.36   1 
   5   6  -2    0.13    1.74   1 
   5  -6  -1  131.06    4.73   1 
   5   6  -1  127.90    5.46   1 
   5  -6   0   29.40    2.44   1 
   5   6   0   28.49    3.61   1 
   5  -6   1   -0.44    1.38   1 
   5   6   1   -1.15    1.57   1 
   5  -6   2   10.65    2.30   1 
   5   6   2    7.27    2.32   1 
   5  -6   3    2.85    1.65   1 
   5   6   3    0.76    1.90   1 
   5  -6   4   22.11    3.20   1 
   5   6   4   21.94    3.30   1 
   5  -6   5   25.27    2.64   1 
   5   6   5   28.32    2.87   1 
   5  -6   6    1.14    1.81   1 
   5   6   6    2.54    2.12   1 
   5  -6   7    4.10    2.27   1 
   5   6   7    4.12    2.19   1 
   5  -6   8    1.96    1.99   1 
   5   6   8    0.34    2.19   1 
   5  -6   9   16.23    3.28   1 
   5   6   9   17.87    3.41   1 
   5  -6  10    0.54    2.30   1 
   5   6  10    4.89    2.54   1 
   5  -6  11    1.29    2.43   1 
   5   6  11    1.16    2.78   1 
   5  -6  12    6.24    2.96   1 
   5   6  12    9.26    3.40   1 
   5  -6  13    6.85    3.08   1 
   5   6  13    6.74    3.42   1 
   5  -6  14   -0.41    2.83   1 
   5   6  14   -0.53    3.19   1 
   5  -6  15    4.46    3.16   1 
   5  -6  16    5.96    3.47   1 
  -5  -7  14   -2.26    2.48   1 
   5   7 -13   -1.28    3.13   1 
   5   7 -12   22.12    4.28   1 
   5  -7 -11    6.98    1.97   1 
   5   7 -11    5.58    3.61   1 
   5  -7 -10    1.65    1.75   1 
   5   7 -10   -0.39    2.81   1 
   5  -7  -9    4.90    2.03   1 
   5   7  -9    5.79    3.05   1 
   5  -7  -8   20.06    2.77   1 
   5   7  -8   20.37    3.87   1 
   5  -7  -7   43.13    2.86   1 
   5   7  -7   46.08    4.04   1 
   5   7  -6   -1.63    2.35   1 
   5  -7  -5    0.86    1.55   1 
   5   7  -5    0.94    2.29   1 
   5  -7  -4   22.64    2.32   1 
   5   7  -4   24.97    3.01   1 
   5  -7  -3   19.10    2.19   1 
   5   7  -3   22.21    3.68   1 
   5  -7  -2    1.67    1.48   1 
   5   7  -2   -0.01    1.89   1 
   5  -7  -1    2.62    1.63   1 
   5   7  -1    4.21    2.14   1 
   5  -7   0   16.79    2.86   1 
   5   7   0   11.15    2.77   1 
   5  -7   1  103.73    4.70   1 
   5   7   1   95.58    5.09   1 
   5  -7   2    4.18    1.93   1 
   5   7   2    3.04    2.33   1 
   5  -7   3   46.06    3.40   1 
   5   7   3   49.46    3.67   1 
   5  -7   4   18.30    3.22   1 
   5   7   4   16.84    3.18   1 
   5  -7   5   23.51    3.57   1 
   5   7   5   17.43    3.32   1 
   5  -7   6    0.46    1.84   1 
   5   7   6   -0.84    2.03   1 
   5  -7   7    0.84    1.95   1 
   5   7   7    0.21    2.28   1 
   5  -7   8    8.94    2.92   1 
   5   7   8    9.15    3.06   1 
   5  -7   9    9.38    2.94   1 
   5   7   9    9.37    3.22   1 
   5  -7  10   -0.37    2.35   1 
   5   7  10    1.92    2.75   1 
   5  -7  11   41.53    3.98   1 
   5   7  11   47.39    4.17   1 
   5  -7  12    3.30    2.85   1 
   5   7  12    4.10    3.05   1 
   5  -7  13    1.18    2.75   1 
   5   7  13    0.45    3.19   1 
   5  -7  14    1.22    2.94   1 
   5   7  14    3.06    3.30   1 
   5  -7  15    8.44    3.50   1 
   5  -7  16    1.92    3.54   1 
  -5  -8  14    6.70    3.28   1 
   5   8 -13   11.52    4.19   1 
   5   8 -12   -1.06    3.39   1 
   5  -8 -11    0.59    2.03   1 
   5   8 -11   -0.63    3.21   1 
   5  -8 -10   16.06    2.78   1 
   5   8 -10   15.66    4.12   1 
   5  -8  -9   16.49    2.83   1 
   5   8  -9   11.74    3.77   1 
   5  -8  -8    5.90    2.19   1 
   5   8  -8    4.51    3.16   1 
   5  -8  -7    9.19    2.44   1 
   5   8  -7    7.12    2.99   1 
   5  -8  -6   38.46    3.02   1 
   5   8  -6   31.42    3.49   1 
   5  -8  -5   32.45    2.85   1 
   5   8  -5   27.22    3.38   1 
   5  -8  -4    2.13    1.74   1 
   5   8  -4   -1.66    2.20   1 
   5  -8  -3   -0.63    1.51   1 
   5   8  -3   -1.55    1.96   1 
   5  -8  -2   14.80    2.75   1 
   5   8  -2   12.80    3.16   1 
   5  -8  -1    7.80    2.31   1 
   5   8  -1    4.39    2.45   1 
   5  -8   0   23.23    3.18   1 
   5   8   0   25.74    3.91   1 
   5  -8   1    9.45    2.52   1 
   5   8   1    8.04    2.76   1 
   5  -8   2   56.23    3.88   1 
   5   8   2   51.28    3.94   1 
   5  -8   3   22.84    2.76   1 
   5   8   3   20.69    3.78   1 
   5  -8   4   -0.20    2.01   1 
   5   8   4    0.33    2.28   1 
   5  -8   5   25.62    3.05   1 
   5   8   5   33.07    4.45   1 
   5  -8   6   21.35    3.70   1 
   5   8   6   20.17    3.77   1 
   5  -8   7    2.07    2.23   1 
   5   8   7   -0.94    2.50   1 
   5  -8   8   -0.93    2.22   1 
   5   8   8    3.43    2.81   1 
   5  -8   9   23.78    4.15   1 
   5   8   9   19.97    3.91   1 
   5  -8  10    7.17    3.17   1 
   5   8  10   11.03    3.49   1 
   5  -8  11    9.86    3.56   1 
   5   8  11   12.99    4.02   1 
   5  -8  12    7.41    3.38   1 
   5   8  12   10.47    3.89   1 
   5  -8  13    4.40    3.24   1 
   5   8  13    1.71    3.80   1 
   5  -8  14   13.04    3.86   1 
   5   8  14   14.55    4.51   1 
   5  -8  15    0.43    3.26   1 
   5  -8  16    3.08    3.59   1 
  -5  -9  14    7.94    3.67   1 
   5   9 -13   -0.33    3.85   1 
   5   9 -12   -2.18    3.84   1 
   5  -9 -11    2.06    2.34   1 
   5   9 -11   -0.63    3.60   1 
   5  -9 -10   15.39    3.15   1 
   5   9 -10   14.26    4.35   1 
   5  -9  -9    7.83    2.73   1 
   5   9  -9    5.13    3.79   1 
   5  -9  -8   17.86    3.27   1 
   5   9  -8   15.07    4.13   1 
   5  -9  -7   10.85    2.71   1 
   5   9  -7    5.15    3.29   1 
   5  -9  -6   23.85    3.59   1 
   5   9  -6   22.28    4.15   1 
   5  -9  -5    9.15    2.61   1 
   5   9  -5    6.90    3.31   1 
   5  -9  -4   47.73    3.58   1 
   5   9  -4   48.08    4.33   1 
   5  -9  -3    5.61    2.26   1 
   5   9  -3   -1.50    2.32   1 
   5  -9  -2   63.45    3.96   1 
   5   9  -2   69.21    4.91   1 
   5  -9  -1    4.19    2.14   1 
   5   9  -1    3.04    2.55   1 
   5  -9   0   59.53    4.04   1 
   5   9   0   53.09    4.36   1 
   5  -9   1   21.59    3.36   1 
   5   9   1   22.94    4.16   1 
   5  -9   2    2.72    2.20   1 
   5   9   2   -0.50    2.20   1 
   5  -9   3    2.72    2.33   1 
   5   9   3    2.07    2.46   1 
   5  -9   4   99.93    5.44   1 
   5   9   4   90.67    5.41   1 
   5  -9   5   -0.25    2.17   1 
   5   9   5    2.34    2.52   1 
   5  -9   6    4.16    2.57   1 
   5   9   6    3.09    2.65   1 
   5  -9   7   -1.09    2.21   1 
   5   9   7   -0.69    2.58   1 
   5  -9   8   31.16    3.69   1 
   5   9   8   29.63    3.59   1 
   5  -9   9    1.68    2.82   1 
   5   9   9    2.19    3.01   1 
   5  -9  10    3.28    2.97   1 
   5   9  10    5.93    3.40   1 
   5  -9  11    1.96    3.10   1 
   5   9  11    1.36    3.40   1 
   5  -9  12    6.83    3.57   1 
   5   9  12    2.63    3.68   1 
   5  -9  13    6.36    3.68   1 
   5   9  13    2.30    3.87   1 
   5  -9  14    1.48    3.62   1 
   5   9  14    3.19    4.04   1 
   5  -9  15    1.56    3.75   1 
   5  -9  16   -2.39    3.77   1 
   5  10 -13    0.04    4.25   1 
   5  10 -12   -0.46    3.81   1 
   5 -10 -11    1.42    2.54   1 
   5  10 -11    0.09    3.66   1 
   5 -10 -10    2.24    2.56   1 
   5  10 -10    0.44    3.40   1 
   5 -10  -9    8.26    2.95   1 
   5  10  -9    7.29    4.20   1 
   5 -10  -8   36.12    3.38   1 
   5  10  -8   42.35    4.81   1 
   5 -10  -7    5.19    2.57   1 
   5  10  -7    2.44    3.41   1 
   5 -10  -6   45.41    3.81   1 
   5  10  -6   45.43    4.62   1 
   5 -10  -5   27.23    3.07   1 
   5  10  -5   32.50    4.97   1 
   5 -10  -4    7.89    2.75   1 
   5  10  -4    6.57    3.12   1 
   5 -10  -3    1.08    2.05   1 
   5  10  -3    3.08    2.91   1 
   5 -10  -2   43.63    3.66   1 
   5  10  -2   36.82    3.86   1 
   5 -10  -1   26.88    3.04   1 
   5  10  -1   26.17    4.41   1 
   5 -10   0   54.97    4.19   1 
   5  10   0   53.57    4.64   1 
   5 -10   1    5.16    2.38   1 
   5  10   1    6.48    3.08   1 
   5 -10   2   49.12    3.90   1 
   5  10   2   48.11    4.26   1 
   5 -10   3    6.14    2.83   1 
   5  10   3    4.33    3.00   1 
   5 -10   4    0.67    2.46   1 
   5  10   4   -0.86    2.67   1 
   5 -10   5    4.14    2.68   1 
   5  10   5    2.99    3.00   1 
   5 -10   6   17.29    4.10   1 
   5  10   6   14.28    3.70   1 
   5 -10   7    7.25    3.30   1 
   5  10   7   11.01    3.52   1 
   5 -10   8   -0.53    2.63   1 
   5  10   8    3.16    2.99   1 
   5 -10   9   -0.62    2.87   1 
   5  10   9   -0.64    2.90   1 
   5 -10  10    5.70    3.45   1 
   5  10  10    6.16    3.65   1 
   5 -10  11    4.85    3.65   1 
   5  10  11    2.28    3.37   1 
   5 -10  12    3.70    3.80   1 
   5  10  12    7.59    4.20   1 
   5 -10  13    1.74    4.13   1 
   5  10  13    3.35    4.67   1 
   5 -10  14   -3.78    3.62   1 
   5  10  14    4.50    4.66   1 
   5 -10  15    0.90    4.05   1 
   5 -10  16    5.35    4.42   1 
   5  11 -13    4.70    5.27   1 
   5  11 -12   -3.15    3.85   1 
   5 -11 -11    4.25    3.03   1 
   5  11 -11    1.10    3.98   1 
   5 -11 -10    2.78    2.86   1 
   5  11 -10    2.83    4.24   1 
   5 -11  -9   30.29    3.38   1 
   5  11  -9   35.44    6.28   1 
   5 -11  -8    3.46    2.63   1 
   5  11  -8    5.85    4.11   1 
   5 -11  -7   54.03    4.12   1 
   5  11  -7   60.93    5.66   1 
   5 -11  -6   10.42    3.08   1 
   5  11  -6   17.52    4.83   1 
   5 -11  -5    2.17    2.39   1 
   5  11  -5    1.83    3.21   1 
   5 -11  -4   12.59    3.23   1 
   5  11  -4   12.27    3.87   1 
   5 -11  -3   35.05    3.68   1 
   5  11  -3   34.50    4.25   1 
   5 -11  -2   16.93    3.55   1 
   5  11  -2    9.85    3.71   1 
   5 -11  -1    4.59    2.62   1 
   5  11  -1    5.24    3.43   1 
   5 -11   0   11.42    3.14   1 
   5  11   0    9.27    3.39   1 
   5 -11   1   32.51    3.68   1 
   5  11   1   31.19    3.84   1 
   5 -11   2   13.66    3.29   1 
   5  11   2   12.98    3.83   1 
   5 -11   3    1.46    2.46   1 
   5  11   3    0.35    2.68   1 
   5 -11   4    6.52    3.31   1 
   5  11   4    9.86    3.46   1 
   5 -11   5   20.43    4.22   1 
   5  11   5   13.72    4.01   1 
   5 -11   6    3.14    2.81   1 
   5  11   6   -0.09    2.85   1 
   5 -11   7   -0.85    2.66   1 
   5  11   7    0.40    2.88   1 
   5 -11   8   -0.08    3.08   1 
   5  11   8    2.08    3.19   1 
   5 -11   9   -0.33    3.26   1 
   5  11   9   -2.22    2.98   1 
   5 -11  10   -1.59    3.20   1 
   5  11  10   -1.05    3.39   1 
   5 -11  11   29.24    5.73   1 
   5  11  11   20.57    5.19   1 
   5 -11  12    2.54    3.67   1 
   5  11  12    0.53    3.92   1 
   5 -11  13    3.64    4.18   1 
   5  11  13    3.41    4.24   1 
   5 -11  14   -1.01    4.30   1 
   5 -11  15   -1.13    4.33   1 
   5 -11  16   -0.31    4.71   1 
  -5 -12  14    4.71    4.33   1 
   5  12 -13   11.17    5.59   1 
   5  12 -12   -1.21    4.71   1 
   5 -12 -11    1.46    3.16   1 
   5  12 -11    1.46    4.47   1 
   5 -12 -10   -0.11    3.07   1 
   5  12 -10   -2.31    4.01   1 
   5 -12  -9    8.10    3.29   1 
   5  12  -9    6.15    4.50   1 
   5 -12  -8    6.18    2.90   1 
   5  12  -8    8.93    4.80   1 
   5 -12  -7   35.02    3.70   1 
   5  12  -7   38.29    6.37   1 
   5 -12  -6    6.99    2.94   1 
   5  12  -6    6.22    4.23   1 
   5 -12  -5   37.27    3.76   1 
   5  12  -5   39.88    4.81   1 
   5 -12  -4    1.59    2.61   1 
   5  12  -4    4.54    3.68   1 
   5 -12  -3    0.59    2.56   1 
   5  12  -3    0.66    3.07   1 
   5 -12  -2    2.62    2.76   1 
   5  12  -2    0.05    2.93   1 
   5 -12  -1   19.60    3.92   1 
   5  12  -1   18.31    4.42   1 
   5 -12   0    5.64    3.00   1 
   5  12   0    3.60    3.38   1 
   5 -12   1    3.25    2.78   1 
   5  12   1    2.83    3.53   1 
   5 -12   2   17.87    4.07   1 
   5  12   2   13.95    4.20   1 
   5 -12   3   29.30    4.55   1 
   5  12   3   21.49    4.51   1 
   5 -12   4    2.34    2.97   1 
   5  12   4    0.41    3.19   1 
   5 -12   5   -0.47    2.80   1 
   5  12   5   -0.48    2.94   1 
   5 -12   6   -1.41    2.78   1 
   5  12   6   -0.56    3.19   1 
   5 -12   7    3.48    3.56   1 
   5  12   7    3.07    3.70   1 
   5 -12   8    1.06    3.28   1 
   5  12   8   -0.54    3.54   1 
   5 -12   9   -0.37    3.27   1 
   5  12   9    1.00    3.81   1 
   5 -12  10   -0.55    3.45   1 
   5  12  10    0.41    3.82   1 
   5 -12  11   -2.39    3.71   1 
   5  12  11    2.81    4.22   1 
   5 -12  12    4.12    4.37   1 
   5  12  12    7.28    4.79   1 
   5 -12  13    2.14    4.63   1 
   5  12  13   -1.88    4.46   1 
   5 -12  14    2.00    4.36   1 
   5 -12  15    1.98    5.01   1 
   5 -12  16    0.75    5.04   1 
  -5 -13  14    3.78    4.94   1 
   5  13 -13    1.48    5.21   1 
   5  13 -12   -1.33    5.38   1 
   5 -13 -11   10.35    4.18   1 
   5  13 -11    5.19    5.69   1 
   5 -13 -10   10.29    4.01   1 
   5  13 -10   10.50    5.11   1 
   5 -13  -9    0.73    3.17   1 
   5  13  -9    6.32    4.90   1 
   5 -13  -8    7.95    3.48   1 
   5  13  -8    4.73    4.49   1 
   5 -13  -7    3.15    3.08   1 
   5  13  -7    6.97    4.89   1 
   5 -13  -6    9.04    3.50   1 
   5  13  -6    4.22    4.22   1 
   5 -13  -5    6.06    3.27   1 
   5  13  -5    7.19    4.18   1 
   5 -13  -4   14.84    4.02   1 
   5  13  -4   12.47    4.49   1 
   5 -13  -3    1.53    2.92   1 
   5  13  -3    2.31    3.53   1 
   5 -13  -2    6.55    3.25   1 
   5  13  -2    2.13    3.20   1 
   5 -13  -1    8.16    3.24   1 
   5  13  -1    6.71    3.70   1 
   5 -13   0   32.17    5.06   1 
   5  13   0   29.04    5.60   1 
   5 -13   1   15.18    4.07   1 
   5  13   1   19.56    4.63   1 
   5 -13   2    0.47    2.75   1 
   5  13   2    2.98    3.34   1 
   5 -13   3    1.76    2.75   1 
   5  13   3    4.12    3.50   1 
   5 -13   4   24.81    4.91   1 
   5  13   4   22.48    5.14   1 
   5 -13   5   -1.34    2.94   1 
   5  13   5   -2.03    3.45   1 
   5 -13   6    2.28    3.52   1 
   5  13   6    3.93    3.92   1 
   5 -13   7   -2.60    3.20   1 
   5  13   7   -0.95    3.59   1 
   5 -13   8   11.38    4.70   1 
   5  13   8    7.89    4.20   1 
   5 -13   9    1.43    3.76   1 
   5  13   9    2.45    3.96   1 
   5 -13  10   11.20    4.69   1 
   5  13  10    5.69    4.58   1 
   5 -13  11   -4.43    3.95   1 
   5  13  11    2.80    4.81   1 
   5 -13  12    4.38    4.52   1 
   5  13  12    3.32    5.52   1 
   5 -13  13    3.76    5.15   1 
   5  13  13    4.26    5.42   1 
   5 -13  14    3.16    5.45   1 
  -5 -14  14    0.05    5.00   1 
   5  14 -13   -1.85    5.96   1 
   5  14 -12   -3.55    5.69   1 
   5 -14 -11   -1.96    3.75   1 
   5  14 -11   -3.95    4.96   1 
   5 -14 -10    4.03    4.00   1 
   5  14 -10    2.12    5.22   1 
   5 -14  -9    0.74    3.72   1 
   5  14  -9   -1.46    5.18   1 
   5 -14  -8    4.19    3.67   1 
   5  14  -8    3.29    4.86   1 
   5 -14  -7    1.08    3.38   1 
   5  14  -7    0.47    4.76   1 
   5 -14  -6   25.58    5.04   1 
   5  14  -6   21.77    6.09   1 
   5 -14  -5    0.66    3.10   1 
   5  14  -5    0.25    4.16   1 
   5 -14  -4    0.03    3.10   1 
   5  14  -4   -0.51    3.96   1 
   5 -14  -3    1.09    3.08   1 
   5  14  -3    2.28    3.75   1 
   5 -14  -2   16.08    4.19   1 
   5  14  -2   14.15    4.44   1 
   5 -14  -1    5.23    3.42   1 
   5  14  -1    4.64    3.72   1 
   5 -14   0   25.81    4.79   1 
   5  14   0   22.64    5.21   1 
   5 -14   1    0.73    3.14   1 
   5  14   1   -1.44    3.28   1 
   5 -14   2   39.37    5.90   1 
   5  14   2   33.42    5.98   1 
   5 -14   3    1.08    2.84   1 
   5  14   3   -0.80    3.50   1 
   5 -14   4    5.08    3.46   1 
   5  14   4    4.43    4.11   1 
   5 -14   5    3.77    3.83   1 
   5  14   5    0.06    3.92   1 
   5 -14   6   14.90    4.66   1 
   5  14   6   10.61    4.30   1 
   5 -14   7   -1.11    3.39   1 
   5  14   7   -0.92    3.60   1 
   5 -14   8    9.80    4.66   1 
   5  14   8    5.80    4.18   1 
   5 -14   9   16.92    5.44   1 
   5  14   9   12.58    4.99   1 
   5 -14  10   14.51    5.36   1 
   5  14  10   12.91    5.10   1 
   5 -14  11    0.05    4.67   1 
   5  14  11    1.78    4.70   1 
   5 -14  12    6.30    5.57   1 
   5  14  12    3.12    5.23   1 
   5 -14  13    2.62    5.25   1 
   5  14  13    2.64    5.89   1 
   5  15 -13   -0.50    6.37   1 
   5  15 -12   -1.22    6.47   1 
   5  15 -11   -0.07    6.04   1 
   5 -15 -10    1.93    4.10   1 
   5  15 -10   -2.27    5.33   1 
   5 -15  -9    8.40    4.55   1 
   5  15  -9    2.66    5.14   1 
   5 -15  -8   18.86    5.19   1 
   5  15  -8   18.31    6.60   1 
   5 -15  -7    6.23    4.15   1 
   5  15  -7    4.42    5.01   1 
   5 -15  -6   -1.15    3.64   1 
   5  15  -6    5.18    5.03   1 
   5 -15  -5    1.94    3.47   1 
   5  15  -5   -3.90    4.21   1 
   5 -15  -4   16.39    4.68   1 
   5  15  -4   18.27    5.66   1 
   5 -15  -3    2.87    3.47   1 
   5  15  -3    1.37    4.57   1 
   5 -15  -2    2.96    3.37   1 
   5  15  -2    4.26    4.51   1 
   5 -15  -1   -0.07    3.02   1 
   5  15  -1   -1.45    3.88   1 
   5 -15   0   25.86    5.14   1 
   5  15   0   18.20    5.34   1 
   5 -15   1   14.25    4.54   1 
   5  15   1    9.01    4.63   1 
   5 -15   2    3.05    3.46   1 
   5  15   2   -1.38    3.88   1 
   5 -15   3   -1.26    2.93   1 
   5  15   3    0.40    3.56   1 
   5 -15   4    2.96    3.59   1 
   5  15   4    2.65    4.05   1 
   5 -15   5   -0.51    3.61   1 
   5  15   5   -0.21    3.75   1 
   5 -15   6   -0.66    3.61   1 
   5  15   6    4.76    4.22   1 
   5 -15   7    8.21    4.49   1 
   5  15   7    7.78    4.76   1 
   5 -15   8    2.42    4.14   1 
   5  15   8    4.35    4.62   1 
   5 -15   9   -2.10    4.68   1 
   5  15   9   -0.04    4.47   1 
   5 -15  10    4.34    4.93   1 
   5  15  10    1.65    4.95   1 
   5 -15  11    1.79    5.49   1 
   5  15  11    3.32    5.07   1 
   5 -15  12   -3.02    5.02   1 
   5  15  12   -0.61    5.41   1 
   5  16 -12    0.23    6.21   1 
   5  16 -11    6.51    6.79   1 
   5 -16 -10    3.97    4.67   1 
   5  16 -10   -0.79    5.80   1 
   5 -16  -9    0.11    4.49   1 
   5  16  -9    0.75    5.77   1 
   5 -16  -8   -3.16    4.15   1 
   5  16  -8    0.57    5.17   1 
   5 -16  -7    5.55    4.17   1 
   5  16  -7    5.88    5.81   1 
   5 -16  -6    3.90    4.03   1 
   5  16  -6    2.18    5.12   1 
   5 -16  -5   10.81    4.65   1 
   5  16  -5   13.40    5.90   1 
   5 -16  -4   -1.72    3.47   1 
   5  16  -4   -0.52    4.74   1 
   5 -16  -3   -1.32    3.35   1 
   5  16  -3    0.64    4.43   1 
   5 -16  -2   10.19    4.32   1 
   5  16  -2    6.32    4.62   1 
   5 -16  -1    4.82    3.59   1 
   5  16  -1    0.38    4.43   1 
   5 -16   0    0.50    3.40   1 
   5  16   0   -3.20    4.23   1 
   5 -16   1    5.84    4.20   1 
   5  16   1    9.89    5.08   1 
   5 -16   2    5.23    3.75   1 
   5  16   2    4.59    4.77   1 
   5 -16   3   10.68    4.35   1 
   5  16   3    5.76    4.49   1 
   5 -16   4    6.09    4.01   1 
   5  16   4    1.85    4.18   1 
   5 -16   5    1.92    4.11   1 
   5  16   5   -3.81    4.39   1 
   5 -16   6    5.26    4.27   1 
   5  16   6    4.76    4.78   1 
   5 -16   7    1.05    4.11   1 
   5  16   7    0.23    4.87   1 
   5 -16   8    0.71    4.76   1 
   5  16   8   -2.04    4.87   1 
   5 -16   9    2.34    4.88   1 
   5  16   9    6.82    5.48   1 
   5 -16  10    2.01    4.98   1 
   5  16  10    2.43    5.68   1 
   5 -17  -9    5.71    5.21   1 
   5  17  -9    5.32    6.39   1 
   5 -17  -8    0.35    4.63   1 
   5  17  -8   -0.60    5.66   1 
   5 -17  -7   18.88    5.97   1 
   5  17  -7    6.23    5.73   1 
   5 -17  -6    1.54    4.52   1 
   5  17  -6   -1.36    5.59   1 
   5 -17  -5   -1.13    4.01   1 
   5  17  -5    2.52    5.59   1 
   5 -17  -4    3.17    4.01   1 
   5  17  -4    0.05    4.91   1 
   5 -17  -3    3.55    4.06   1 
   5  17  -3   -4.74    4.80   1 
   5 -17  -2    3.37    4.11   1 
   5  17  -2    3.01    5.11   1 
   5 -17  -1    0.84    3.74   1 
   5  17  -1   -2.32    4.66   1 
   5 -17   0   -3.45    3.63   1 
   5  17   0   -0.65    4.70   1 
   5 -17   1    9.60    4.20   1 
   5  17   1    5.54    5.33   1 
   5 -17   2   -1.00    3.42   1 
   5  17   2   -0.48    4.31   1 
   5 -17   3    1.57    3.95   1 
   5  17   3   -1.26    4.54   1 
   5 -17   4    1.88    4.20   1 
   5  17   4    0.05    4.69   1 
   5 -17   5    0.32    4.26   1 
   5  17   5    0.56    4.77   1 
   5 -17   6    2.73    4.71   1 
   5  17   6   -1.07    5.18   1 
   5 -17   7   -0.33    4.20   1 
   5  17   7    0.67    5.05   1 
   5 -17   8    4.85    5.04   1 
   5  17   8    5.01    5.47   1 
   5 -18  -6    2.92    4.86   1 
   5  18  -6   -1.55    5.59   1 
   5 -18  -5    0.23    4.32   1 
   5  18  -5   -2.46    5.79   1 
   5 -18  -4    3.38    4.19   1 
   5  18  -4    6.34    5.72   1 
   5 -18  -3   -0.89    4.07   1 
   5  18  -3   -3.25    5.05   1 
   5 -18  -2   -1.69    4.08   1 
   5  18  -2   -2.46    5.14   1 
   5 -18  -1   -2.13    4.35   1 
   5  18  -1    2.63    5.52   1 
   5 -18   0    0.84    4.21   1 
   5  18   0   -2.50    5.31   1 
   5 -18   1   -0.70    3.77   1 
   5  18   1   -2.08    5.12   1 
   5 -18   2   10.67    4.50   1 
   5  18   2    8.49    5.53   1 
   5 -18   3   -0.51    4.11   1 
   5  18   3   -0.92    5.14   1 
   5 -18   4   -2.28    4.47   1 
   5  18   4   -0.23    5.09   1 
   6   0  -8    2.15    1.28   1 
   6   0  -7   -0.40    1.09   1 
   6   0  -6  143.56    3.80   1 
   6   0  -5    1.62    1.13   1 
   6   0  -4   42.46    2.28   1 
   6   0  -3    0.24    0.98   1 
   6   0  -2   83.96    3.17   1 
   6   0  -1    0.95    1.14   1 
   6   0   0  137.73    4.32   1 
   6   0   1    0.48    1.04   1 
   6   0   2   12.69    2.11   1 
   6   0   3    5.70    1.69   1 
   6   0   4  210.74    6.06   1 
   6   0   5   10.24    2.23   1 
   6   0   6    2.16    1.64   1 
   6   0   7   -0.45    1.64   1 
   6   0   8    0.63    1.66   1 
   6   0   9    3.72    2.17   1 
   6   0  10    1.01    2.38   1 
   6   0  11    2.42    2.65   1 
   6   0  12   12.74    3.45   1 
   6   0  13   -2.15    2.72   1 
   6   0  14   -1.02    3.08   1 
   6   0  15    0.59    3.12   1 
   6   1  -8   75.47    2.88   1 
   6  -1  -7   22.65    1.69   1 
   6   1  -7   26.87    1.98   1 
   6  -1  -6    9.71    1.48   1 
   6   1  -6    7.81    1.66   1 
   6  -1  -5  106.37    3.26   1 
   6   1  -5  112.94    3.67   1 
   6  -1  -4   13.65    1.87   1 
   6   1  -4   13.16    1.95   1 
   6  -1  -3   71.51    2.87   1 
   6   1  -3   72.77    3.09   1 
   6  -1  -2    4.47    1.35   1 
   6   1  -2    3.41    1.28   1 
   6  -1  -1    9.68    1.71   1 
   6   1  -1    6.72    1.72   1 
   6  -1   0   36.46    2.32   1 
   6   1   0   35.64    2.38   1 
   6  -1   1   19.30    1.83   1 
   6   1   1   21.82    2.03   1 
   6  -1   2  281.17    6.61   1 
   6   1   2  267.90    6.65   1 
   6  -1   3   73.73    3.54   1 
   6   1   3   67.69    3.53   1 
   6  -1   4    4.98    1.66   1 
   6   1   4    4.08    1.74   1 
   6  -1   5   17.82    2.15   1 
   6   1   5   20.72    3.00   1 
   6  -1   6   11.39    2.48   1 
   6   1   6   10.02    2.36   1 
   6  -1   7   12.50    2.68   1 
   6   1   7    9.46    2.46   1 
   6  -1   8    2.19    2.01   1 
   6   1   8    2.19    1.97   1 
   6  -1   9   24.37    2.85   1 
   6   1   9   23.02    2.76   1 
   6  -1  10   83.61    4.74   1 
   6   1  10   81.80    4.93   1 
   6  -1  11    1.01    2.40   1 
   6   1  11    3.74    2.50   1 
   6  -1  12    6.77    2.88   1 
   6   1  12    9.98    3.22   1 
   6  -1  13   19.58    3.90   1 
   6   1  13   18.82    4.08   1 
   6  -1  14    0.51    3.17   1 
   6   1  14    2.10    3.08   1 
   6  -1  15    4.07    3.47   1 
   6   1  15    1.97    3.15   1 
   6   2 -10    2.25    1.70   1 
   6   2  -9    7.49    2.04   1 
   6  -2  -8    1.44    1.08   1 
   6   2  -8    1.14    1.71   1 
   6  -2  -7  135.38    3.51   1 
   6   2  -7  150.42    4.40   1 
   6  -2  -6   14.06    1.80   1 
   6   2  -6   12.83    2.09   1 
   6  -2  -5   43.41    2.24   1 
   6   2  -5   38.65    2.41   1 
   6  -2  -4   25.55    1.77   1 
   6   2  -4   27.63    2.16   1 
   6  -2  -3   70.98    2.89   1 
   6   2  -3   67.59    3.21   1 
   6  -2  -2   74.50    3.08   1 
   6   2  -2   75.83    3.39   1 
   6  -2  -1    2.75    1.28   1 
   6   2  -1    2.49    1.38   1 
   6  -2   0    1.47    1.24   1 
   6   2   0    2.62    1.33   1 
   6  -2   1   66.61    3.19   1 
   6   2   1   65.81    3.32   1 
   6  -2   2   42.02    2.69   1 
   6   2   2   43.72    2.92   1 
   6  -2   3   74.22    3.54   1 
   6   2   3   71.01    3.66   1 
   6  -2   4   22.65    2.23   1 
   6   2   4   20.12    2.24   1 
   6  -2   5    3.12    1.77   1 
   6   2   5    2.94    1.74   1 
   6  -2   6    9.95    2.43   1 
   6   2   6   12.12    2.59   1 
   6  -2   7   33.12    2.93   1 
   6   2   7   30.48    2.87   1 
   6  -2   8   23.15    3.44   1 
   6   2   8   24.90    3.56   1 
   6  -2   9    5.90    2.48   1 
   6   2   9    5.88    2.59   1 
   6  -2  10    4.83    2.30   1 
   6   2  10    5.04    2.66   1 
   6  -2  11   79.85    4.84   1 
   6   2  11   81.43    4.84   1 
   6  -2  12    8.80    3.03   1 
   6   2  12   10.49    3.08   1 
   6  -2  13    0.95    2.63   1 
   6   2  13    1.71    2.85   1 
   6  -2  14   -1.48    2.89   1 
   6   2  14    1.46    3.00   1 
   6  -2  15    6.72    3.43   1 
   6   2  15    6.92    3.47   1 
   6   3 -12   15.60    2.72   1 
   6   3 -11    1.59    2.05   1 
   6   3 -10    0.24    1.90   1 
   6  -3  -9    1.18    1.17   1 
   6   3  -9   -1.33    1.72   1 
   6  -3  -8   23.88    1.76   1 
   6   3  -8    8.51    2.30   1 
   6  -3  -7   23.66    1.77   1 
   6   3  -7   23.40    2.39   1 
   6  -3  -6   19.33    1.65   1 
   6   3  -6    8.50    2.16   1 
   6  -3  -5    6.93    1.52   1 
   6   3  -5    4.95    1.78   1 
   6  -3  -4   26.03    1.90   1 
   6   3  -4   22.25    2.11   1 
   6  -3  -3    3.80    1.36   1 
   6   3  -3    1.52    1.55   1 
   6  -3  -2   16.76    1.70   1 
   6   3  -2   15.83    1.92   1 
   6  -3  -1  146.76    4.48   1 
   6   3  -1  127.60    4.56   1 
   6  -3   0   68.12    3.25   1 
   6   3   0   70.50    3.59   1 
   6  -3   1   32.20    2.39   1 
   6   3   1   34.63    2.70   1 
   6  -3   2   65.55    3.30   1 
   6   3   2   72.72    3.73   1 
   6  -3   3   23.32    2.27   1 
   6   3   3   20.31    2.33   1 
   6  -3   4   19.77    2.78   1 
   6   3   4   18.50    2.29   1 
   6  -3   5  129.55    5.04   1 
   6   3   5  132.47    5.34   1 
   6  -3   6    7.30    2.13   1 
   6   3   6    5.73    2.16   1 
   6  -3   7   20.77    2.44   1 
   6   3   7   29.04    3.78   1 
   6  -3   8    2.13    1.73   1 
   6   3   8    1.64    2.07   1 
   6  -3   9  143.33    6.04   1 
   6   3   9  144.21    6.17   1 
   6  -3  10   12.88    3.07   1 
   6   3  10   14.12    3.14   1 
   6  -3  11   -0.97    2.18   1 
   6   3  11   -0.20    2.36   1 
   6  -3  12   19.57    3.73   1 
   6   3  12   13.09    3.49   1 
   6  -3  13   12.48    3.42   1 
   6   3  13   15.97    3.80   1 
   6  -3  14    1.98    2.99   1 
   6   3  14    1.48    2.84   1 
   6  -3  15   -0.70    3.12   1 
   6   3  15   -0.33    3.16   1 
   6  -3  16    3.06    3.59   1 
   6   4 -12    0.14    2.61   1 
   6   4 -11   12.35    2.96   1 
   6  -4 -10   30.26    2.02   1 
   6   4 -10   35.62    2.94   1 
   6  -4  -9    7.07    1.70   1 
   6   4  -9    7.27    2.34   1 
   6  -4  -8    2.20    1.40   1 
   6   4  -8    1.77    2.06   1 
   6  -4  -7    3.97    1.46   1 
   6   4  -7    1.67    1.96   1 
   6  -4  -6   39.31    2.27   1 
   6   4  -6   31.96    2.87   1 
   6  -4  -5    6.80    1.61   1 
   6   4  -5    2.30    1.76   1 
   6  -4  -4    0.38    1.20   1 
   6   4  -4   -1.28    1.48   1 
   6  -4  -3   39.89    2.44   1 
   6   4  -3   31.26    2.60   1 
   6  -4  -2   26.97    2.11   1 
   6   4  -2   26.37    2.44   1 
   6  -4  -1   43.68    2.66   1 
   6   4  -1   44.00    3.02   1 
   6  -4   0   68.76    3.35   1 
   6   4   0   64.62    3.54   1 
   6  -4   1    8.74    1.99   1 
   6   4   1    4.40    1.82   1 
   6  -4   2   27.53    2.47   1 
   6   4   2   25.25    2.45   1 
   6  -4   3    9.84    2.12   1 
   6   4   3    6.82    2.09   1 
   6  -4   4   26.46    2.51   1 
   6   4   4   27.85    2.69   1 
   6  -4   5    0.88    1.62   1 
   6   4   5    0.71    1.65   1 
   6  -4   6   12.10    2.48   1 
   6   4   6   10.85    2.49   1 
   6  -4   7   22.33    3.26   1 
   6   4   7   19.91    3.20   1 
   6  -4   8   20.71    3.34   1 
   6   4   8   17.90    3.10   1 
   6  -4   9    4.70    2.35   1 
   6   4   9    5.88    2.48   1 
   6  -4  10    9.66    2.84   1 
   6   4  10   12.90    3.09   1 
   6  -4  11   20.48    3.67   1 
   6   4  11   23.40    3.89   1 
   6  -4  12    1.19    2.60   1 
   6   4  12    1.81    2.61   1 
   6  -4  13    3.41    2.81   1 
   6   4  13    2.17    2.87   1 
   6  -4  14   24.05    4.41   1 
   6   4  14   27.19    4.60   1 
   6  -4  15    6.03    3.36   1 
   6   4  15    3.75    3.41   1 
   6  -4  16    5.29    3.63   1 
   6   5 -13    0.17    2.70   1 
   6   5 -12   23.87    3.97   1 
   6  -5 -11    1.61    1.61   1 
   6   5 -11    0.86    2.63   1 
   6  -5 -10    2.14    1.48   1 
   6   5 -10    3.90    2.51   1 
   6  -5  -9    2.94    1.55   1 
   6   5  -9    2.55    2.24   1 
   6  -5  -8   48.29    2.60   1 
   6   5  -8   47.97    3.58   1 
   6  -5  -7   17.02    2.23   1 
   6   5  -7   16.63    3.19   1 
   6  -5  -6    9.18    1.89   1 
   6   5  -6    7.01    2.41   1 
   6  -5  -5   30.30    2.22   1 
   6   5  -5   25.30    2.82   1 
   6  -5  -4    4.09    1.56   1 
   6   5  -4    0.64    1.63   1 
   6  -5  -3    0.50    1.29   1 
   6   5  -3    2.12    1.88   1 
   6  -5  -2    2.13    1.45   1 
   6   5  -2    1.21    1.68   1 
   6  -5  -1   17.07    1.95   1 
   6   5  -1   19.16    2.97   1 
   6  -5   0   16.74    1.97   1 
   6   5   0   17.99    3.00   1 
   6  -5   1   85.23    3.94   1 
   6   5   1   88.56    4.39   1 
   6  -5   2  108.53    4.54   1 
   6   5   2  101.51    4.73   1 
   6  -5   3    2.11    1.64   1 
   6   5   3    0.38    1.80   1 
   6  -5   4    6.33    2.04   1 
   6   5   4    4.80    2.16   1 
   6  -5   5   -0.63    1.63   1 
   6   5   5   -0.54    1.64   1 
   6  -5   6   20.37    2.48   1 
   6   5   6   24.12    3.62   1 
   6  -5   7    2.05    1.97   1 
   6   5   7    5.43    2.36   1 
   6  -5   8    2.84    2.06   1 
   6   5   8    3.65    2.21   1 
   6  -5   9    3.02    2.30   1 
   6   5   9    2.02    2.20   1 
   6  -5  10   20.70    3.70   1 
   6   5  10   18.06    3.64   1 
   6  -5  11   -0.87    2.23   1 
   6   5  11    0.33    2.51   1 
   6  -5  12    2.37    2.64   1 
   6   5  12    3.39    2.90   1 
   6  -5  13    0.26    2.80   1 
   6   5  13    1.48    3.10   1 
   6  -5  14    4.62    2.99   1 
   6   5  14    2.87    3.39   1 
   6  -5  15    0.31    3.08   1 
   6   5  15   -0.66    3.27   1 
   6  -5  16    0.31    3.32   1 
   6   6 -13    0.09    3.23   1 
   6   6 -12    8.09    3.60   1 
   6  -6 -11    0.67    1.64   1 
   6   6 -11   -2.21    2.67   1 
   6  -6 -10    3.39    1.74   1 
   6   6 -10    4.02    2.80   1 
   6  -6  -9    5.87    1.88   1 
   6   6  -9    4.31    2.66   1 
   6  -6  -8    2.45    1.64   1 
   6   6  -8    1.03    2.43   1 
   6  -6  -7   56.67    2.97   1 
   6   6  -7   57.38    4.13   1 
   6  -6  -6   26.06    2.25   1 
   6   6  -6   29.35    4.23   1 
   6  -6  -5    8.40    1.97   1 
   6   6  -5    4.68    2.38   1 
   6  -6  -4   23.26    2.18   1 
   6   6  -4   25.15    2.82   1 
   6  -6  -3   41.69    2.77   1 
   6   6  -3   38.28    3.36   1 
   6  -6  -2    2.46    1.68   1 
   6   6  -2    0.33    1.86   1 
   6  -6  -1   23.83    2.29   1 
   6   6  -1   24.65    3.54   1 
   6  -6   0   16.36    2.66   1 
   6   6   0   13.97    2.85   1 
   6  -6   1  202.87    6.31   1 
   6   6   1  208.31    6.97   1 
   6  -6   2    3.84    1.79   1 
   6   6   2    2.29    1.97   1 
   6  -6   3   16.09    2.85   1 
   6   6   3   14.43    2.94   1 
   6  -6   4   39.36    3.22   1 
   6   6   4   40.74    3.45   1 
   6  -6   5   27.95    3.84   1 
   6   6   5   25.11    3.71   1 
   6  -6   6    2.12    1.93   1 
   6   6   6    2.53    2.25   1 
   6  -6   7   -0.49    2.02   1 
   6   6   7   -1.10    1.99   1 
   6  -6   8    4.05    2.28   1 
   6   6   8    3.59    2.52   1 
   6  -6   9    0.47    2.31   1 
   6   6   9    1.47    2.49   1 
   6  -6  10    0.09    2.31   1 
   6   6  10    1.56    2.45   1 
   6  -6  11    6.90    3.09   1 
   6   6  11    8.60    3.28   1 
   6  -6  12   19.22    3.89   1 
   6   6  12   17.77    4.03   1 
   6  -6  13    2.09    2.93   1 
   6   6  13    1.30    3.06   1 
   6  -6  14   -0.92    2.82   1 
   6   6  14   -0.95    3.34   1 
   6  -6  15    0.77    3.11   1 
   6  -6  16    3.13    3.62   1 
   6   7 -13   24.14    4.85   1 
   6   7 -12    2.77    3.42   1 
   6  -7 -11    1.51    1.91   1 
   6   7 -11   -2.84    2.97   1 
   6  -7 -10    1.48    1.86   1 
   6   7 -10   -0.60    2.87   1 
   6  -7  -9   19.47    2.76   1 
   6   7  -9   19.13    3.79   1 
   6  -7  -8    6.90    2.10   1 
   6   7  -8    2.95    2.65   1 
   6  -7  -7    7.60    2.15   1 
   6   7  -7    6.98    2.91   1 
   6  -7  -6    5.87    2.02   1 
   6   7  -6    5.17    2.60   1 
   6  -7  -5   96.64    4.25   1 
   6   7  -5  113.08    5.81   1 
   6  -7  -4   17.68    2.74   1 
   6   7  -4    8.22    2.97   1 
   6  -7  -3   13.69    2.48   1 
   6   7  -3   12.41    3.05   1 
   6  -7  -2   21.37    2.37   1 
   6   7  -2   20.42    3.68   1 
   6  -7  -1   26.40    2.61   1 
   6   7  -1   24.88    3.01   1 
   6  -7   0    4.91    1.91   1 
   6   7   0    3.18    2.24   1 
   6  -7   1    7.45    2.44   1 
   6   7   1    8.76    2.82   1 
   6  -7   2    2.21    1.79   1 
   6   7   2    2.26    2.22   1 
   6  -7   3   20.68    3.30   1 
   6   7   3   19.71    3.52   1 
   6  -7   4    2.34    1.90   1 
   6   7   4    0.07    2.10   1 
   6  -7   5   23.70    3.61   1 
   6   7   5   21.12    3.53   1 
   6  -7   6    9.30    2.74   1 
   6   7   6    8.67    2.88   1 
   6  -7   7   17.81    3.41   1 
   6   7   7   17.54    3.60   1 
   6  -7   8   -1.23    2.04   1 
   6   7   8    2.76    2.62   1 
   6  -7   9   16.82    3.73   1 
   6   7   9   18.11    3.76   1 
   6  -7  10    1.60    2.59   1 
   6   7  10    2.72    2.83   1 
   6  -7  11    0.19    2.75   1 
   6   7  11    2.07    2.91   1 
   6  -7  12    8.74    3.51   1 
   6   7  12    7.53    3.50   1 
   6  -7  13   12.69    3.86   1 
   6   7  13   11.08    4.13   1 
   6  -7  14   -0.02    3.10   1 
   6   7  14    0.77    3.65   1 
   6  -7  15    0.30    3.38   1 
   6  -7  16   -0.87    3.38   1 
   6   8 -13   -0.25    3.50   1 
   6   8 -12   12.49    4.25   1 
   6  -8 -11   21.46    2.50   1 
   6   8 -11   26.44    5.12   1 
   6  -8 -10    1.15    2.08   1 
   6   8 -10   -0.67    3.19   1 
   6  -8  -9   -1.29    1.95   1 
   6   8  -9   -1.07    2.86   1 
   6  -8  -8    7.61    2.43   1 
   6   8  -8    5.64    3.14   1 
   6  -8  -7   28.97    2.70   1 
   6   8  -7   32.54    4.67   1 
   6  -8  -6   27.88    2.65   1 
   6   8  -6   33.67    4.69   1 
   6  -8  -5    2.40    1.92   1 
   6   8  -5   -0.37    2.32   1 
   6  -8  -4   69.96    4.07   1 
   6   8  -4   63.32    4.58   1 
   6  -8  -3   35.59    3.07   1 
   6   8  -3   30.07    4.49   1 
   6  -8  -2   11.65    2.67   1 
   6   8  -2   14.86    3.34   1 
   6  -8  -1    4.80    2.09   1 
   6   8  -1    2.95    2.35   1 
   6  -8   0   11.17    2.60   1 
   6   8   0   10.47    3.05   1 
   6  -8   1   14.53    3.04   1 
   6   8   1   10.97    3.30   1 
   6  -8   2   27.79    3.93   1 
   6   8   2   22.55    4.05   1 
   6  -8   3   49.13    3.81   1 
   6   8   3   47.50    4.05   1 
   6  -8   4   19.96    3.52   1 
   6   8   4   19.58    3.68   1 
   6  -8   5   28.90    4.18   1 
   6   8   5   28.57    4.31   1 
   6  -8   6    0.55    2.10   1 
   6   8   6    0.40    2.41   1 
   6  -8   7   -0.90    2.11   1 
   6   8   7    0.12    2.37   1 
   6  -8   8    5.59    2.95   1 
   6   8   8    4.83    3.06   1 
   6  -8   9   20.96    4.05   1 
   6   8   9   23.60    4.37   1 
   6  -8  10    4.55    3.20   1 
   6   8  10    1.78    3.13   1 
   6  -8  11   20.16    4.43   1 
   6   8  11   20.78    4.44   1 
   6  -8  12    4.32    3.27   1 
   6   8  12    4.70    3.57   1 
   6  -8  13   -1.51    3.07   1 
   6   8  13   -2.15    3.41   1 
   6  -8  14    5.70    3.71   1 
   6   8  14    9.90    4.53   1 
   6  -8  15    3.77    3.60   1 
   6  -8  16    2.40    3.79   1 
   6   9 -14    1.63    4.43   1 
   6   9 -13   -0.74    3.86   1 
   6   9 -12    0.38    3.98   1 
   6  -9 -11   -1.99    2.32   1 
   6   9 -11   -1.31    3.48   1 
   6  -9 -10    8.87    2.58   1 
   6   9 -10    8.43    3.97   1 
   6  -9  -9    8.81    2.54   1 
   6   9  -9    6.93    3.70   1 
   6  -9  -8   38.29    3.09   1 
   6   9  -8   44.19    4.57   1 
   6  -9  -7    9.71    2.48   1 
   6   9  -7    6.63    3.39   1 
   6  -9  -6   43.60    3.34   1 
   6   9  -6   44.83    4.35   1 
   6  -9  -5   14.49    2.82   1 
   6   9  -5    9.73    3.23   1 
   6  -9  -4    5.32    2.16   1 
   6   9  -4    3.63    2.81   1 
   6  -9  -3   11.21    2.73   1 
   6   9  -3   11.35    3.33   1 
   6  -9  -2    6.45    2.54   1 
   6   9  -2    2.83    2.81   1 
   6  -9  -1    3.63    2.27   1 
   6   9  -1    1.12    2.32   1 
   6  -9   0   19.55    3.52   1 
   6   9   0   12.43    3.35   1 
   6  -9   1   15.44    3.10   1 
   6   9   1   12.96    3.43   1 
   6  -9   2   90.01    5.16   1 
   6   9   2   84.42    5.34   1 
   6  -9   3    0.54    2.24   1 
   6   9   3   -0.34    2.35   1 
   6  -9   4    1.65    2.43   1 
   6   9   4    0.60    2.45   1 
   6  -9   5    2.05    2.46   1 
   6   9   5    0.74    2.68   1 
   6  -9   6   23.53    4.18   1 
   6   9   6   20.52    4.25   1 
   6  -9   7    3.15    2.80   1 
   6   9   7    1.19    2.97   1 
   6  -9   8    2.86    2.85   1 
   6   9   8    3.03    3.19   1 
   6  -9   9    6.80    3.34   1 
   6   9   9   10.32    3.90   1 
   6  -9  10   13.86    4.07   1 
   6   9  10   18.81    4.65   1 
   6  -9  11   -0.49    3.23   1 
   6   9  11   -0.14    3.43   1 
   6  -9  12   29.31    5.25   1 
   6   9  12   32.00    5.86   1 
   6  -9  13    2.24    3.49   1 
   6   9  13    1.05    3.88   1 
   6  -9  14    3.96    3.60   1 
   6   9  14    1.98    4.12   1 
   6  -9  15    1.41    3.85   1 
   6  -9  16    9.24    4.55   1 
   6  10 -14    6.40    5.12   1 
   6  10 -13    4.24    4.38   1 
   6  10 -12    5.48    4.59   1 
   6 -10 -11    8.01    2.87   1 
   6  10 -11    7.02    4.25   1 
   6 -10 -10   13.56    3.12   1 
   6  10 -10    8.97    4.45   1 
   6 -10  -9    7.19    2.74   1 
   6  10  -9    2.43    3.75   1 
   6 -10  -8   21.98    3.86   1 
   6  10  -8   21.77    4.84   1 
   6 -10  -7   35.33    3.48   1 
   6  10  -7   38.73    5.51   1 
   6 -10  -6    5.65    2.68   1 
   6  10  -6    4.81    3.74   1 
   6 -10  -5   -1.50    2.17   1 
   6  10  -5   -0.11    2.99   1 
   6 -10  -4   23.55    3.71   1 
   6  10  -4   24.21    4.54   1 
   6 -10  -3   26.56    2.97   1 
   6  10  -3   31.36    3.86   1 
   6 -10  -2   19.25    3.39   1 
   6  10  -2   12.08    3.56   1 
   6 -10  -1   18.94    3.60   1 
   6  10  -1   17.84    4.15   1 
   6 -10   0   17.17    3.74   1 
   6  10   0   11.96    3.54   1 
   6 -10   1   25.49    3.18   1 
   6  10   1   28.92    4.81   1 
   6 -10   2    8.65    2.89   1 
   6  10   2    6.90    3.10   1 
   6 -10   3    1.16    2.44   1 
   6  10   3    0.11    2.51   1 
   6 -10   4   23.69    4.19   1 
   6  10   4   19.91    4.21   1 
   6 -10   5    3.21    2.76   1 
   6  10   5    2.35    2.92   1 
   6 -10   6    1.13    2.59   1 
   6  10   6   -0.59    2.53   1 
   6 -10   7   19.21    4.39   1 
   6  10   7   13.63    3.81   1 
   6 -10   8    6.50    3.31   1 
   6  10   8    5.14    3.51   1 
   6 -10   9    4.21    3.36   1 
   6  10   9    3.50    3.38   1 
   6 -10  10    8.96    3.75   1 
   6  10  10    6.68    3.86   1 
   6 -10  11    8.87    3.93   1 
   6  10  11    7.59    4.22   1 
   6 -10  12   13.96    4.80   1 
   6  10  12   11.67    4.37   1 
   6 -10  13    1.32    3.76   1 
   6  10  13   -0.39    3.82   1 
   6 -10  14    5.20    4.18   1 
   6  10  14    3.22    4.51   1 
   6 -10  15    1.53    3.96   1 
   6 -10  16    1.34    4.23   1 
   6  11 -14    2.39    5.48   1 
   6  11 -13   22.69    5.86   1 
   6  11 -12    0.57    4.29   1 
   6 -11 -11    3.38    2.92   1 
   6  11 -11   -1.14    4.05   1 
   6 -11 -10    0.10    2.76   1 
   6  11 -10   -2.00    4.11   1 
   6 -11  -9   28.43    3.51   1 
   6  11  -9   33.42    6.05   1 
   6 -11  -8   10.20    3.21   1 
   6  11  -8   10.68    4.23   1 
   6 -11  -7    3.60    2.82   1 
   6  11  -7    2.69    3.48   1 
   6 -11  -6    5.36    2.85   1 
   6  11  -6    3.24    3.27   1 
   6 -11  -5   41.41    3.89   1 
   6  11  -5   39.15    4.78   1 
   6 -11  -4    5.30    2.84   1 
   6  11  -4    5.58    3.28   1 
   6 -11  -3    8.98    3.03   1 
   6  11  -3    6.16    3.52   1 
   6 -11  -2    8.28    2.69   1 
   6  11  -2    8.11    3.34   1 
   6 -11  -1   27.41    3.20   1 
   6  11  -1   35.45    5.35   1 
   6 -11   0    2.49    2.44   1 
   6  11   0    0.92    2.96   1 
   6 -11   1    4.93    2.95   1 
   6  11   1    6.73    3.33   1 
   6 -11   2    2.84    2.64   1 
   6  11   2    2.06    3.15   1 
   6 -11   3    9.98    3.33   1 
   6  11   3    8.90    3.58   1 
   6 -11   4   -0.80    2.70   1 
   6  11   4   -1.29    2.95   1 
   6 -11   5   -1.11    2.62   1 
   6  11   5   -1.09    2.82   1 
   6 -11   6    0.35    2.82   1 
   6  11   6   -0.17    2.72   1 
   6 -11   7    5.87    3.49   1 
   6  11   7    7.58    3.55   1 
   6 -11   8    1.49    3.23   1 
   6  11   8    1.82    3.32   1 
   6 -11   9    5.86    3.73   1 
   6  11   9    3.81    3.63   1 
   6 -11  10   -0.86    3.53   1 
   6  11  10    3.85    3.66   1 
   6 -11  11    4.43    4.17   1 
   6  11  11    2.10    3.96   1 
   6 -11  12   -2.26    3.70   1 
   6  11  12   -1.06    4.53   1 
   6 -11  13    4.20    4.46   1 
   6  11  13    4.78    4.90   1 
   6 -11  14   -1.01    4.27   1 
   6  11  14   -1.31    4.81   1 
   6 -11  15   -3.21    4.44   1 
   6 -11  16   -3.06    4.51   1 
   6  12 -14   -1.47    4.92   1 
   6  12 -13    2.85    5.01   1 
   6  12 -12    7.09    5.25   1 
   6 -12 -11   22.09    4.47   1 
   6  12 -11   15.85    6.04   1 
   6 -12 -10   -0.85    3.13   1 
   6  12 -10   -3.85    4.07   1 
   6 -12  -9    5.09    3.14   1 
   6  12  -9   -2.69    4.30   1 
   6 -12  -8    1.47    2.86   1 
   6  12  -8    0.02    4.04   1 
   6 -12  -7   46.43    4.21   1 
   6  12  -7   46.89    5.43   1 
   6 -12  -6    8.23    3.09   1 
   6  12  -6    5.47    3.89   1 
   6 -12  -5   -1.59    2.48   1 
   6  12  -5   -0.99    3.25   1 
   6 -12  -4    0.69    2.60   1 
   6  12  -4    0.29    3.39   1 
   6 -12  -3   19.21    4.10   1 
   6  12  -3   15.97    4.43   1 
   6 -12  -2    3.05    2.79   1 
   6  12  -2    3.05    3.38   1 
   6 -12  -1   -0.40    2.34   1 
   6  12  -1   -1.19    3.00   1 
   6 -12   0    3.24    2.65   1 
   6  12   0    1.73    3.12   1 
   6 -12   1    9.94    3.56   1 
   6  12   1    7.53    3.68   1 
   6 -12   2    3.99    3.14   1 
   6  12   2    2.32    3.64   1 
   6 -12   3    3.13    3.02   1 
   6  12   3    5.20    3.61   1 
   6 -12   4   18.95    4.36   1 
   6  12   4   12.48    4.07   1 
   6 -12   5   -0.42    3.03   1 
   6  12   5   -0.77    3.41   1 
   6 -12   6   -0.08    2.96   1 
   6  12   6    0.69    3.57   1 
   6 -12   7    0.02    3.04   1 
   6  12   7    2.18    3.39   1 
   6 -12   8    0.74    3.60   1 
   6  12   8    0.27    3.66   1 
   6 -12   9    0.38    3.75   1 
   6  12   9   -0.40    3.64   1 
   6 -12  10    2.93    3.90   1 
   6  12  10    0.42    4.21   1 
   6 -12  11   13.53    4.96   1 
   6  12  11    7.65    4.82   1 
   6 -12  12    1.44    4.45   1 
   6  12  12    4.27    4.81   1 
   6 -12  13    2.33    4.64   1 
   6  12  13   -0.67    4.61   1 
   6 -12  14   -1.42    4.38   1 
   6 -12  15    4.63    5.69   1 
   6  13 -14   -2.93    5.49   1 
   6  13 -13    0.88    5.81   1 
   6  13 -12    5.87    5.81   1 
   6 -13 -11    1.36    3.66   1 
   6  13 -11   -1.41    4.90   1 
   6 -13 -10    0.96    3.42   1 
   6  13 -10   -2.27    4.57   1 
   6 -13  -9    5.72    3.79   1 
   6  13  -9    6.78    4.98   1 
   6 -13  -8    4.50    3.38   1 
   6  13  -8    6.38    4.99   1 
   6 -13  -7    8.36    3.62   1 
   6  13  -7    4.49    4.73   1 
   6 -13  -6   24.57    4.75   1 
   6  13  -6   28.94    5.84   1 
   6 -13  -5   31.98    3.98   1 
   6  13  -5   35.66    6.29   1 
   6 -13  -4    0.80    2.81   1 
   6  13  -4   -1.71    3.22   1 
   6 -13  -3    1.76    2.85   1 
   6  13  -3    0.19    3.48   1 
   6 -13  -2    2.95    3.04   1 
   6  13  -2    6.23    4.03   1 
   6 -13  -1   12.85    3.55   1 
   6  13  -1    4.96    3.42   1 
   6 -13   0    7.37    3.33   1 
   6  13   0    5.52    3.92   1 
   6 -13   1    4.09    3.14   1 
   6  13   1    2.29    3.61   1 
   6 -13   2   25.11    4.92   1 
   6  13   2   24.42    5.16   1 
   6 -13   3    8.97    3.63   1 
   6  13   3    8.16    3.87   1 
   6 -13   4    2.43    3.22   1 
   6  13   4    0.67    3.39   1 
   6 -13   5   -1.38    3.13   1 
   6  13   5   -0.99    3.41   1 
   6 -13   6    3.57    3.49   1 
   6  13   6    3.59    3.87   1 
   6 -13   7   -1.85    3.23   1 
   6  13   7   -3.32    3.35   1 
   6 -13   8    1.64    3.62   1 
   6  13   8    2.20    4.06   1 
   6 -13   9   -0.15    3.95   1 
   6  13   9   -0.21    3.98   1 
   6 -13  10   15.37    5.16   1 
   6  13  10   12.94    5.21   1 
   6 -13  11   -0.08    4.38   1 
   6  13  11   -1.50    4.21   1 
   6 -13  12   13.37    5.41   1 
   6  13  12   12.14    5.50   1 
   6 -13  13   -2.34    4.60   1 
   6  13  13   -4.11    4.69   1 
   6 -13  14    3.40    5.78   1 
   6  14 -14   10.50    6.97   1 
   6  14 -13    2.77    6.53   1 
   6  14 -12    1.66    5.69   1 
   6  14 -11   -0.03    5.24   1 
   6 -14 -10    7.33    4.13   1 
   6  14 -10    3.94    5.74   1 
   6 -14  -9    1.05    3.54   1 
   6  14  -9    1.06    4.77   1 
   6 -14  -8   14.48    4.18   1 
   6  14  -8   11.29    5.72   1 
   6 -14  -7    2.48    3.37   1 
   6  14  -7    0.61    4.65   1 
   6 -14  -6    5.05    3.42   1 
   6  14  -6    3.04    4.95   1 
   6 -14  -5    3.60    3.45   1 
   6  14  -5    2.10    4.12   1 
   6 -14  -4   28.36    5.16   1 
   6  14  -4   24.44    5.72   1 
   6 -14  -3    2.68    3.09   1 
   6  14  -3   -1.64    3.71   1 
   6 -14  -2   -1.54    2.91   1 
   6  14  -2   -3.24    3.11   1 
   6 -14  -1    1.29    2.87   1 
   6  14  -1    1.77    3.67   1 
   6 -14   0   38.18    5.53   1 
   6  14   0   27.98    5.97   1 
   6 -14   1    7.21    3.63   1 
   6  14   1    2.45    3.64   1 
   6 -14   2    2.43    3.44   1 
   6  14   2    2.80    3.64   1 
   6 -14   3    2.07    3.42   1 
   6  14   3    4.66    4.06   1 
   6 -14   4   13.71    4.47   1 
   6  14   4   15.16    4.84   1 
   6 -14   5    1.30    3.51   1 
   6  14   5   -0.43    3.66   1 
   6 -14   6    5.55    4.15   1 
   6  14   6    0.78    3.89   1 
   6 -14   7    3.33    3.93   1 
   6  14   7   -0.73    3.89   1 
   6 -14   8    3.67    4.18   1 
   6  14   8   -0.89    4.06   1 
   6 -14   9    0.85    4.36   1 
   6  14   9    0.14    4.36   1 
   6 -14  10    6.81    4.96   1 
   6  14  10    6.00    5.15   1 
   6 -14  11    1.53    4.88   1 
   6  14  11    1.78    4.91   1 
   6 -14  12   10.56    5.76   1 
   6  14  12    3.44    5.64   1 
   6 -14  13    1.86    5.51   1 
   6  14  13    1.33    5.51   1 
   6  15 -13    7.92    7.39   1 
   6  15 -12   -2.17    6.11   1 
   6  15 -11    2.44    6.02   1 
   6 -15 -10    2.49    4.29   1 
   6  15 -10   -1.91    5.25   1 
   6 -15  -9   -3.77    4.02   1 
   6  15  -9   -0.97    5.47   1 
   6 -15  -8   21.96    5.26   1 
   6  15  -8   15.32    5.86   1 
   6 -15  -7    6.06    4.13   1 
   6  15  -7    9.75    5.63   1 
   6 -15  -6    2.40    3.82   1 
   6  15  -6    3.35    5.06   1 
   6 -15  -5    5.87    3.89   1 
   6  15  -5    2.80    4.74   1 
   6 -15  -4    5.39    3.74   1 
   6  15  -4    6.68    4.60   1 
   6 -15  -3    1.01    3.38   1 
   6  15  -3   -0.58    4.21   1 
   6 -15  -2   11.31    4.05   1 
   6  15  -2    8.49    4.68   1 
   6 -15  -1   -0.96    2.91   1 
   6  15  -1    0.57    4.06   1 
   6 -15   0    4.61    3.45   1 
   6  15   0    3.47    3.84   1 
   6 -15   1    7.23    3.81   1 
   6  15   1    4.61    4.28   1 
   6 -15   2    1.21    3.45   1 
   6  15   2    2.96    3.85   1 
   6 -15   3   -0.68    3.44   1 
   6  15   3   -1.40    3.70   1 
   6 -15   4   -2.62    3.31   1 
   6  15   4    1.81    4.24   1 
   6 -15   5    4.44    3.97   1 
   6  15   5    5.52    4.25   1 
   6 -15   6   -1.29    3.81   1 
   6  15   6   -1.02    3.72   1 
   6 -15   7   -0.53    3.84   1 
   6  15   7   -1.41    4.23   1 
   6 -15   8   -0.90    4.04   1 
   6  15   8    0.00    4.41   1 
   6 -15   9    1.90    4.52   1 
   6  15   9    3.71    4.67   1 
   6 -15  10   -1.91    4.77   1 
   6  15  10   -1.25    4.74   1 
   6 -15  11    4.96    5.32   1 
   6  15  11    1.52    5.32   1 
   6  16 -11    0.55    6.16   1 
   6 -16 -10   -2.88    4.43   1 
   6  16 -10   -2.56    5.86   1 
   6 -16  -9   11.26    5.38   1 
   6  16  -9   11.81    6.57   1 
   6 -16  -8    4.24    4.57   1 
   6  16  -8    2.82    5.81   1 
   6 -16  -7   26.26    5.95   1 
   6  16  -7   21.83    6.99   1 
   6 -16  -6   -1.87    3.76   1 
   6  16  -6    4.34    5.58   1 
   6 -16  -5    2.74    4.19   1 
   6  16  -5   -1.50    5.21   1 
   6 -16  -4   -1.66    3.89   1 
   6  16  -4   -1.85    4.90   1 
   6 -16  -3    6.42    4.22   1 
   6  16  -3    4.50    5.22   1 
   6 -16  -2    4.81    3.69   1 
   6  16  -2    3.28    4.60   1 
   6 -16  -1    0.95    3.17   1 
   6  16  -1    2.27    4.55   1 
   6 -16   0    1.12    3.65   1 
   6  16   0    0.66    4.38   1 
   6 -16   1   22.60    5.61   1 
   6  16   1   10.22    5.08   1 
   6 -16   2    1.32    3.91   1 
   6  16   2   -2.27    4.01   1 
   6 -16   3   -0.47    3.52   1 
   6  16   3    0.83    4.52   1 
   6 -16   4   -0.82    3.69   1 
   6  16   4   -1.50    3.94   1 
   6 -16   5    1.43    3.92   1 
   6  16   5    0.93    4.39   1 
   6 -16   6   -0.48    4.18   1 
   6  16   6   -3.32    4.19   1 
   6 -16   7   -2.80    4.20   1 
   6  16   7   -1.12    4.76   1 
   6 -16   8   -2.81    4.61   1 
   6  16   8    1.85    5.21   1 
   6 -16   9    7.88    5.60   1 
   6  16   9    3.17    5.48   1 
   6 -17  -9    8.04    5.51   1 
   6  17  -9    2.31    5.78   1 
   6 -17  -8    6.62    5.09   1 
   6  17  -8    4.07    6.48   1 
   6 -17  -7    1.74    4.62   1 
   6  17  -7    4.45    5.89   1 
   6 -17  -6   -3.27    4.34   1 
   6  17  -6    0.40    5.57   1 
   6 -17  -5   17.78    5.82   1 
   6  17  -5   14.26    6.53   1 
   6 -17  -4    0.51    4.05   1 
   6  17  -4    0.04    5.66   1 
   6 -17  -3    2.83    4.09   1 
   6  17  -3   -2.58    5.11   1 
   6 -17  -2   -0.96    3.66   1 
   6  17  -2    0.64    5.08   1 
   6 -17  -1    1.09    3.71   1 
   6  17  -1    1.18    5.20   1 
   6 -17   0    5.65    4.25   1 
   6  17   0    1.28    4.86   1 
   6 -17   1    2.34    4.21   1 
   6  17   1   -1.18    4.56   1 
   6 -17   2    1.82    4.32   1 
   6  17   2    3.86    5.04   1 
   6 -17   3    0.42    3.82   1 
   6  17   3   -2.83    4.52   1 
   6 -17   4   -2.12    3.85   1 
   6  17   4   -1.51    4.70   1 
   6 -17   5   -2.30    4.22   1 
   6  17   5    1.58    5.20   1 
   6 -17   6   -0.06    4.74   1 
   6  17   6   -4.99    4.91   1 
   6 -17   7    2.02    5.20   1 
   6  17   7    1.69    5.28   1 
   6 -18  -5   -0.40    4.17   1 
   6  18  -5   -0.52    5.84   1 
   6 -18  -4    2.72    4.29   1 
   6  18  -4    0.81    5.72   1 
   6 -18  -3    0.26    4.06   1 
   6  18  -3    2.27    6.00   1 
   6 -18  -2   -0.63    3.81   1 
   6  18  -2   -2.59    5.34   1 
   6 -18  -1   -2.93    3.96   1 
   6  18  -1    2.59    5.60   1 
   6 -18   0    5.34    4.55   1 
   6  18   0   -0.89    5.43   1 
   6 -18   1    0.51    4.44   1 
   6  18   1    0.57    5.07   1 
   6 -18   2    0.99    4.34   1 
   6  18   2   -1.64    5.37   1 
   6 -18   3   -0.43    4.29   1 
   6  18   3   -2.11    4.97   1 
   7   0  -9    0.25    1.36   1 
   7   0  -8  130.63    3.88   1 
   7   0  -7   -0.10    1.24   1 
   7   0  -6    8.48    1.76   1 
   7   0  -5    0.82    1.15   1 
   7   0  -4  100.50    3.71   1 
   7   0  -3   -0.70    1.09   1 
   7   0  -2   23.68    2.03   1 
   7   0  -1    3.82    1.53   1 
   7   0   0   15.04    1.86   1 
   7   0   1    1.55    1.34   1 
   7   0   2  284.80    7.14   1 
   7   0   4    6.25    2.08   1 
   7   0   5    7.24    2.12   1 
   7   0   6   79.02    4.39   1 
   7   0   7   -0.49    1.65   1 
   7   0   8   25.48    3.76   1 
   7   0   9    4.54    2.46   1 
   7   0  10   42.95    3.96   1 
   7   0  11    2.26    2.65   1 
   7   0  12    1.26    2.83   1 
   7   0  13    3.31    3.08   1 
   7   0  14    2.95    3.34   1 
   7   0  15   -3.07    3.19   1 
   7   1  -9   19.55    1.97   1 
   7  -1  -8    1.10    1.18   1 
   7   1  -8    1.38    1.46   1 
   7  -1  -7   23.92    1.95   1 
   7   1  -7   24.40    2.05   1 
   7  -1  -6  148.91    4.07   1 
   7   1  -6  157.28    4.62   1 
   7  -1  -5   40.31    2.32   1 
   7   1  -5   42.52    2.56   1 
   7  -1  -4  173.43    4.76   1 
   7   1  -4  171.51    4.93   1 
   7  -1  -3   49.24    2.68   1 
   7   1  -3   49.20    2.77   1 
   7  -1  -2   38.49    2.47   1 
   7   1  -2   31.87    2.36   1 
   7  -1  -1   12.32    2.15   1 
   7   1  -1   13.34    2.26   1 
   7  -1   0   14.50    1.75   1 
   7   1   0   18.49    2.65   1 
   7  -1   1   72.17    3.49   1 
   7   1   1   75.58    3.73   1 
   7  -1   2   51.22    3.06   1 
   7   1   2   49.60    3.19   1 
   7  -1   3   29.26    2.50   1 
   7   1   3   32.55    2.77   1 
   7  -1   4   51.94    3.37   1 
   7   1   4   52.65    3.47   1 
   7  -1   5    1.43    1.73   1 
   7   1   5   -0.36    1.77   1 
   7  -1   6    2.76    1.89   1 
   7   1   6    3.54    2.14   1 
   7  -1   7    2.19    1.82   1 
   7   1   7    5.16    2.28   1 
   7  -1   8   65.26    4.25   1 
   7   1   8   61.62    4.18   1 
   7  -1   9    5.09    2.44   1 
   7   1   9    8.56    2.75   1 
   7  -1  10    1.59    2.29   1 
   7   1  10    1.72    2.46   1 
   7  -1  11   10.44    3.31   1 
   7   1  11    7.85    3.00   1 
   7  -1  12    4.60    2.84   1 
   7   1  12    3.91    3.02   1 
   7  -1  13    3.49    2.91   1 
   7   1  13    3.21    3.20   1 
   7  -1  14    2.14    3.31   1 
   7   1  14   -1.44    3.12   1 
   7  -1  15   -1.64    3.25   1 
   7   1  15   -2.23    3.10   1 
   7  -1  16   -0.77    3.42   1 
   7   2 -11    8.55    2.27   1 
   7   2 -10    1.38    2.02   1 
   7  -2  -9    0.59    1.22   1 
   7   2  -9    0.22    1.84   1 
   7  -2  -8   44.10    2.31   1 
   7   2  -8   52.12    3.01   1 
   7  -2  -7    1.44    1.29   1 
   7   2  -7    0.44    1.56   1 
   7  -2  -6    8.24    1.70   1 
   7   2  -6    7.41    1.96   1 
   7  -2  -5   42.33    2.45   1 
   7   2  -5   47.75    2.88   1 
   7  -2  -4   43.60    2.53   1 
   7   2  -4   49.06    2.99   1 
   7  -2  -3   72.70    3.22   1 
   7   2  -3   74.38    3.56   1 
   7  -2  -2   11.55    2.01   1 
   7   2  -2    9.12    2.02   1 
   7  -2  -1  109.25    4.15   1 
   7   2  -1  110.68    4.39   1 
   7  -2   0    2.82    1.45   1 
   7   2   0    3.71    1.63   1 
   7  -2   1    3.09    1.47   1 
   7   2   1    2.05    1.57   1 
   7  -2   2   97.06    4.28   1 
   7   2   2   87.29    4.16   1 
   7  -2   3  201.10    6.25   1 
   7   2   3  194.12    6.29   1 
   7  -2   4   10.52    2.41   1 
   7   2   4   10.07    2.48   1 
   7  -2   5   21.49    3.17   1 
   7   2   5   24.11    3.35   1 
   7  -2   6    7.82    2.26   1 
   7   2   6    7.49    2.48   1 
   7  -2   7    8.37    2.42   1 
   7   2   7    8.74    2.64   1 
   7  -2   8   10.41    2.67   1 
   7   2   8   11.99    2.98   1 
   7  -2   9    7.46    2.64   1 
   7   2   9    4.50    2.63   1 
   7  -2  10    4.71    2.61   1 
   7   2  10    2.80    2.73   1 
   7  -2  11   -1.11    2.17   1 
   7   2  11   -1.38    2.30   1 
   7  -2  12    6.47    3.10   1 
   7   2  12    8.06    3.25   1 
   7  -2  13    6.55    3.20   1 
   7   2  13    9.75    3.35   1 
   7  -2  14   13.26    3.74   1 
   7   2  14   12.71    4.05   1 
   7  -2  15    0.61    3.29   1 
   7   2  15    1.67    3.43   1 
   7  -2  16   -0.86    3.70   1 
   7   3 -12    9.23    2.66   1 
   7   3 -11   -1.85    2.03   1 
   7   3 -10    3.69    2.15   1 
   7  -3  -9    1.84    1.40   1 
   7   3  -9    0.83    1.95   1 
   7  -3  -8    0.34    1.30   1 
   7   3  -8    0.24    1.92   1 
   7  -3  -7   15.93    2.14   1 
   7   3  -7   22.12    3.04   1 
   7  -3  -6   62.63    2.90   1 
   7   3  -6   60.07    3.43   1 
   7  -3  -5   15.13    1.68   1 
   7   3  -5   16.90    2.66   1 
   7  -3  -4    1.57    1.25   1 
   7   3  -4    2.34    1.64   1 
   7  -3  -3   13.51    1.65   1 
   7   3  -3   15.80    2.55   1 
   7  -3  -2   10.26    1.92   1 
   7   3  -2    5.34    1.74   1 
   7  -3  -1   45.72    2.77   1 
   7   3  -1   44.72    3.10   1 
   7  -3   0    5.08    1.67   1 
   7   3   0    4.45    1.81   1 
   7  -3   1   98.30    4.18   1 
   7   3   1  102.84    4.60   1 
   7  -3   2   11.22    2.35   1 
   7   3   2   10.91    2.55   1 
   7  -3   3   48.08    3.19   1 
   7   3   3   41.96    3.20   1 
   7  -3   4   20.85    2.40   1 
   7   3   4   21.70    2.59   1 
   7  -3   5   12.18    2.52   1 
   7   3   5    9.00    2.55   1 
   7  -3   6    3.63    1.92   1 
   7   3   6    2.93    2.21   1 
   7  -3   7    5.07    2.19   1 
   7   3   7    4.25    2.32   1 
   7  -3   8    1.51    2.00   1 
   7   3   8    2.28    2.35   1 
   7  -3   9    2.92    2.26   1 
   7   3   9    0.36    2.35   1 
   7  -3  10    5.45    2.66   1 
   7   3  10    4.88    2.82   1 
   7  -3  11   18.25    3.79   1 
   7   3  11   18.40    3.83   1 
   7  -3  12    1.62    2.43   1 
   7   3  12   -1.77    2.71   1 
   7  -3  13    0.58    2.76   1 
   7   3  13    0.51    2.90   1 
   7  -3  14    3.34    3.18   1 
   7   3  14    2.29    3.45   1 
   7  -3  15    2.69    3.14   1 
   7   3  15    8.15    3.71   1 
   7  -3  16   -1.45    3.31   1 
   7   4 -12    7.43    2.98   1 
   7   4 -11    4.04    2.44   1 
   7  -4 -10    0.87    1.46   1 
   7   4 -10   -0.95    2.06   1 
   7  -4  -9    2.54    1.44   1 
   7   4  -9   -1.19    2.12   1 
   7  -4  -8   48.01    2.68   1 
   7   4  -8   41.16    3.23   1 
   7  -4  -7   41.64    2.48   1 
   7   4  -7   36.60    3.17   1 
   7  -4  -6   12.18    2.08   1 
   7   4  -6   14.23    2.78   1 
   7  -4  -5   12.95    2.11   1 
   7   4  -5    7.69    2.33   1 
   7  -4  -4   20.53    1.98   1 
   7   4  -4   23.47    3.14   1 
   7  -4  -3   20.65    1.98   1 
   7   4  -3   23.02    2.45   1 
   7  -4  -2    5.32    1.73   1 
   7   4  -2    3.33    1.85   1 
   7  -4  -1   16.56    2.52   1 
   7   4  -1   14.23    2.62   1 
   7  -4   0   19.20    2.70   1 
   7   4   0    9.16    2.28   1 
   7  -4   1   40.63    2.87   1 
   7   4   1   38.18    3.01   1 
   7  -4   2  185.06    6.03   1 
   7   4   2  177.88    6.13   1 
   7  -4   3    3.38    1.69   1 
   7   4   3   -0.16    1.67   1 
   7  -4   4   -0.52    1.49   1 
   7   4   4    0.27    1.66   1 
   7  -4   5   69.72    4.08   1 
   7   4   5   66.82    4.25   1 
   7  -4   6    4.56    2.19   1 
   7   4   6    4.24    2.28   1 
   7  -4   7    2.20    1.97   1 
   7   4   7    1.67    2.09   1 
   7  -4   8    3.48    2.23   1 
   7   4   8    3.13    2.44   1 
   7  -4   9   23.13    3.77   1 
   7   4   9   30.38    4.34   1 
   7  -4  10   35.86    4.72   1 
   7   4  10   31.66    4.41   1 
   7  -4  11   -1.09    2.40   1 
   7   4  11   -1.42    2.30   1 
   7  -4  12    1.33    2.67   1 
   7   4  12    0.35    2.82   1 
   7  -4  13    2.20    2.78   1 
   7   4  13    4.32    3.31   1 
   7  -4  14    0.03    2.99   1 
   7   4  14    1.82    3.35   1 
   7  -4  15    2.81    3.41   1 
   7   4  15    1.77    3.70   1 
   7  -4  16    0.06    3.63   1 
   7   5 -13    6.39    3.29   1 
   7   5 -12   -1.10    2.85   1 
   7  -5 -11    5.69    1.92   1 
   7   5 -11    4.07    2.68   1 
   7  -5 -10   16.05    2.42   1 
   7   5 -10   15.71    3.28   1 
   7   5  -9   11.55    3.29   1 
   7  -5  -8    4.17    1.84   1 
   7   5  -8    6.89    2.69   1 
   7  -5  -7   44.66    2.70   1 
   7   5  -7   35.55    3.27   1 
   7  -5  -6  198.15    5.43   1 
   7   5  -6  210.38    7.18   1 
   7  -5  -5    1.65    1.51   1 
   7   5  -5   -1.66    1.92   1 
   7  -5  -4   17.21    1.98   1 
   7   5  -4   21.04    3.31   1 
   7  -5  -3   43.86    2.86   1 
   7   5  -3   42.69    3.37   1 
   7  -5  -2    9.73    2.14   1 
   7   5  -2    4.27    2.16   1 
   7  -5  -1   29.72    2.51   1 
   7   5  -1   24.53    2.62   1 
   7  -5   0   27.44    2.44   1 
   7   5   0   30.13    2.88   1 
   7  -5   1   21.24    3.06   1 
   7   5   1   18.37    3.16   1 
   7  -5   2    0.86    1.66   1 
   7   5   2    1.85    1.93   1 
   7  -5   3    2.91    1.89   1 
   7   5   3    1.81    2.08   1 
   7  -5   4   51.44    3.56   1 
   7   5   4   48.00    3.69   1 
   7  -5   5    0.34    1.81   1 
   7   5   5    1.55    2.08   1 
   7  -5   6   11.95    2.80   1 
   7   5   6   14.23    3.20   1 
   7  -5   7    0.97    1.90   1 
   7   5   7    2.04    2.32   1 
   7  -5   8   15.99    3.29   1 
   7   5   8   18.33    3.57   1 
   7  -5   9    0.01    2.06   1 
   7   5   9    0.28    2.50   1 
   7  -5  10    0.95    2.33   1 
   7   5  10    0.78    2.68   1 
   7  -5  11   15.42    3.62   1 
   7   5  11   13.07    3.54   1 
   7  -5  12    6.94    3.15   1 
   7   5  12    6.65    3.48   1 
   7  -5  13    2.48    3.04   1 
   7   5  13    2.24    3.24   1 
   7  -5  14    7.66    3.59   1 
   7   5  14    9.03    3.84   1 
   7  -5  15    1.50    3.27   1 
   7   5  15   -0.85    3.68   1 
   7  -5  16    3.45    3.73   1 
   7   6 -13   21.72    4.21   1 
   7   6 -12    3.63    3.25   1 
   7  -6 -11    0.55    1.81   1 
   7   6 -11   -2.33    2.68   1 
   7  -6 -10    0.02    1.64   1 
   7   6 -10    1.73    2.87   1 
   7  -6  -9    3.66    1.81   1 
   7   6  -9    1.34    2.57   1 
   7  -6  -8   56.84    3.10   1 
   7   6  -8   62.84    4.36   1 
   7  -6  -7   28.44    2.40   1 
   7   6  -7   28.97    4.18   1 
   7  -6  -6   10.54    2.20   1 
   7   6  -6   10.71    2.99   1 
   7  -6  -5   92.58    4.02   1 
   7   6  -5   78.68    4.82   1 
   7  -6  -4    1.28    1.58   1 
   7   6  -4   -1.77    2.19   1 
   7  -6  -3    3.43    1.75   1 
   7   6  -3    0.12    2.10   1 
   7  -6  -2   13.41    2.43   1 
   7   6  -2    6.50    2.49   1 
   7  -6  -1  107.34    4.65   1 
   7   6  -1   99.33    5.03   1 
   7  -6   0   16.71    2.73   1 
   7   6   0   11.35    2.86   1 
   7  -6   1    3.02    1.91   1 
   7   6   1    4.62    2.36   1 
   7  -6   2   72.70    4.11   1 
   7   6   2   67.90    4.33   1 
   7  -6   3   55.98    3.75   1 
   7   6   3   56.28    4.00   1 
   7  -6   4    0.25    1.81   1 
   7   6   4    0.52    2.08   1 
   7  -6   5    5.68    2.57   1 
   7   6   5    9.42    2.82   1 
   7  -6   6   16.42    3.21   1 
   7   6   6   13.56    3.32   1 
   7  -6   7    0.31    2.11   1 
   7   6   7    0.93    2.31   1 
   7  -6   8    1.11    2.15   1 
   7   6   8    1.74    2.54   1 
   7  -6   9    3.77    2.72   1 
   7   6   9    3.39    2.70   1 
   7  -6  10   34.52    3.61   1 
   7   6  10   32.76    3.76   1 
   7  -6  11    0.45    2.65   1 
   7   6  11    0.07    2.78   1 
   7  -6  12    4.38    3.03   1 
   7   6  12    8.73    3.73   1 
   7  -6  13    7.42    3.23   1 
   7   6  13   12.39    3.99   1 
   7  -6  14    0.43    3.15   1 
   7   6  14    3.69    3.58   1 
   7  -6  15    1.35    3.69   1 
   7   6  15    3.49    4.02   1 
   7  -6  16   -0.40    3.46   1 
   7   7 -13   32.61    4.06   1 
   7   7 -12   -3.15    3.30   1 
   7  -7 -11   12.25    2.55   1 
   7   7 -11   15.98    4.05   1 
   7  -7 -10    0.88    1.85   1 
   7   7 -10   -1.45    2.74   1 
   7  -7  -9    7.19    2.28   1 
   7   7  -9    6.50    3.19   1 
   7  -7  -8    3.20    1.91   1 
   7   7  -8    1.29    2.57   1 
   7  -7  -7   51.80    3.24   1 
   7   7  -7   49.69    4.31   1 
   7   7  -6    0.27    2.86   1 
   7  -7  -5    1.55    1.69   1 
   7   7  -5   -0.03    2.36   1 
   7  -7  -4    1.04    1.64   1 
   7   7  -4   -1.33    2.15   1 
   7  -7  -3   36.31    2.96   1 
   7   7  -3   34.23    3.65   1 
   7  -7  -2   15.43    2.76   1 
   7   7  -2    8.70    3.02   1 
   7  -7  -1    3.90    1.99   1 
   7   7  -1    2.25    2.22   1 
   7  -7   0    2.94    2.00   1 
   7   7   0    1.00    2.35   1 
   7  -7   1   80.56    4.44   1 
   7   7   1   75.02    4.71   1 
   7  -7   2    1.26    1.84   1 
   7   7   2   -0.34    2.17   1 
   7  -7   3   12.21    2.94   1 
   7   7   3   11.71    3.30   1 
   7  -7   4    1.05    1.99   1 
   7   7   4    0.52    2.30   1 
   7  -7   5   24.26    2.99   1 
   7   7   5   23.14    3.81   1 
   7  -7   6   26.23    4.08   1 
   7   7   6   21.41    3.77   1 
   7  -7   7   10.88    3.19   1 
   7   7   7   10.47    3.23   1 
   7  -7   8    1.88    2.44   1 
   7   7   8    0.80    2.86   1 
   7  -7   9   11.71    3.41   1 
   7   7   9    6.73    2.99   1 
   7  -7  10    2.11    2.74   1 
   7   7  10    2.26    2.90   1 
   7  -7  11   43.34    4.42   1 
   7   7  11   43.97    4.46   1 
   7  -7  12   -0.54    2.77   1 
   7   7  12   -1.45    3.22   1 
   7  -7  13    3.98    3.27   1 
   7   7  13    5.19    3.95   1 
   7  -7  14    8.99    3.92   1 
   7   7  14   11.60    4.48   1 
   7  -7  15    4.00    3.61   1 
   7  -7  16    1.58    3.69   1 
   7   8 -13    4.58    3.98   1 
   7   8 -12    6.94    4.12   1 
   7  -8 -11    7.92    2.56   1 
   7   8 -11    7.91    3.74   1 
   7  -8 -10    1.44    2.10   1 
   7   8 -10    0.65    3.16   1 
   7  -8  -9    2.30    2.13   1 
   7   8  -9   -1.31    3.03   1 
   7  -8  -8   20.52    3.21   1 
   7   8  -8   16.41    4.15   1 
   7  -8  -7   14.32    2.88   1 
   7   8  -7   12.64    3.64   1 
   7  -8  -6   21.08    2.52   1 
   7   8  -6   28.83    4.54   1 
   7  -8  -5   45.37    3.38   1 
   7   8  -5   42.77    4.39   1 
   7  -8  -4   27.32    3.56   1 
   7   8  -4   25.36    4.22   1 
   7  -8  -3    1.68    1.88   1 
   7   8  -3   -0.08    2.21   1 
   7  -8  -2    1.06    1.85   1 
   7   8  -2   -0.30    2.39   1 
   7  -8  -1    2.53    1.99   1 
   7   8  -1    2.43    2.75   1 
   7  -8   0   17.77    3.25   1 
   7   8   0   15.85    3.49   1 
   7  -8   1   15.06    3.14   1 
   7   8   1    6.70    2.80   1 
   7  -8   2   33.71    3.36   1 
   7   8   2   34.26    3.61   1 
   7  -8   3   58.99    4.24   1 
   7   8   3   57.47    4.45   1 
   7  -8   4   14.78    3.30   1 
   7   8   4   11.71    3.33   1 
   7  -8   5    4.65    2.44   1 
   7   8   5    3.60    2.81   1 
   7  -8   6    3.67    2.73   1 
   7   8   6    3.24    2.75   1 
   7  -8   7    8.08    3.02   1 
   7   8   7    8.32    3.13   1 
   7  -8   8    6.10    3.04   1 
   7   8   8    7.64    3.23   1 
   7  -8   9   19.66    4.08   1 
   7   8   9   17.99    4.24   1 
   7  -8  10    1.02    2.91   1 
   7   8  10    3.80    3.42   1 
   7  -8  11   -2.07    2.75   1 
   7   8  11   -2.21    3.45   1 
   7  -8  12   20.15    4.49   1 
   7   8  12   27.24    5.28   1 
   7  -8  13    7.27    3.68   1 
   7   8  13    8.66    4.26   1 
   7  -8  14    1.14    3.49   1 
   7   8  14    0.02    3.99   1 
   7  -8  15    0.11    3.53   1 
   7  -8  16    5.41    3.97   1 
   7   9 -13   -0.84    4.12   1 
   7   9 -12    3.31    4.12   1 
   7  -9 -11    0.76    2.33   1 
   7   9 -11    1.05    3.73   1 
   7  -9 -10   31.16    3.10   1 
   7   9 -10   41.33    5.86   1 
   7  -9  -9    4.40    2.38   1 
   7   9  -9    4.24    3.22   1 
   7  -9  -8    2.07    2.14   1 
   7   9  -8    0.96    3.25   1 
   7  -9  -7    1.55    2.22   1 
   7   9  -7    0.25    2.95   1 
   7  -9  -6   20.05    3.35   1 
   7   9  -6   15.10    3.97   1 
   7  -9  -5   22.28    3.46   1 
   7   9  -5   20.38    4.16   1 
   7  -9  -4    9.19    2.69   1 
   7   9  -4    8.39    3.37   1 
   7  -9  -3   15.12    3.07   1 
   7   9  -3    8.78    3.45   1 
   7  -9  -2   27.13    3.05   1 
   7   9  -2   32.93    4.88   1 
   7  -9  -1    0.98    2.18   1 
   7   9  -1    0.98    2.52   1 
   7  -9   0   -1.81    1.91   1 
   7   9   0   -0.26    2.41   1 
   7  -9   1    3.43    2.39   1 
   7   9   1    0.15    2.53   1 
   7  -9   2    0.03    2.12   1 
   7   9   2    0.59    2.76   1 
   7  -9   3    0.43    2.10   1 
   7   9   3    0.31    2.50   1 
   7  -9   4   38.36    3.89   1 
   7   9   4   34.25    4.02   1 
   7  -9   5    5.63    2.75   1 
   7   9   5    1.39    2.77   1 
   7  -9   6    2.34    2.71   1 
   7   9   6    1.29    2.97   1 
   7  -9   7    2.50    2.78   1 
   7   9   7    2.73    2.89   1 
   7  -9   8    2.49    2.97   1 
   7   9   8    1.99    3.17   1 
   7  -9   9   -1.51    2.77   1 
   7   9   9    0.94    3.47   1 
   7  -9  10    5.62    3.43   1 
   7   9  10    4.80    3.59   1 
   7  -9  11    1.18    3.21   1 
   7   9  11   -0.51    3.61   1 
   7  -9  12   14.26    4.43   1 
   7   9  12   15.73    4.93   1 
   7  -9  13   -1.88    3.53   1 
   7   9  13    1.24    4.30   1 
   7  -9  14   18.69    5.01   1 
   7   9  14   22.00    5.73   1 
   7  -9  15   -1.06    3.90   1 
   7  -9  16    1.96    4.22   1 
   7  10 -13   15.29    5.02   1 
   7  10 -12   19.90    5.27   1 
   7 -10 -11    6.03    2.97   1 
   7  10 -11    5.58    4.45   1 
   7 -10 -10   -1.73    2.37   1 
   7  10 -10    0.32    3.91   1 
   7 -10  -9   15.72    3.43   1 
   7  10  -9   14.52    4.30   1 
   7 -10  -8   20.53    3.74   1 
   7  10  -8   12.72    4.09   1 
   7 -10  -7   13.53    3.36   1 
   7  10  -7   17.83    4.53   1 
   7 -10  -6   16.26    3.43   1 
   7  10  -6   11.02    3.99   1 
   7 -10  -5   46.58    3.93   1 
   7  10  -5   42.36    4.42   1 
   7 -10  -4   20.84    3.72   1 
   7  10  -4   16.97    4.35   1 
   7 -10  -3    0.94    2.36   1 
   7  10  -3   -0.46    2.79   1 
   7 -10  -2    0.10    2.15   1 
   7  10  -2   -0.61    2.62   1 
   7 -10  -1    9.95    3.03   1 
   7  10  -1    6.56    3.24   1 
   7 -10   0    1.22    2.45   1 
   7  10   0   -0.90    2.56   1 
   7 -10   1    6.43    2.88   1 
   7  10   1    0.59    2.65   1 
   7 -10   2   10.45    3.30   1 
   7  10   2    7.67    3.26   1 
   7 -10   3    5.33    2.81   1 
   7  10   3    4.96    3.28   1 
   7 -10   4    1.04    2.53   1 
   7  10   4   -0.66    2.69   1 
   7 -10   5    0.09    2.62   1 
   7  10   5   -1.10    2.86   1 
   7 -10   6    3.37    2.93   1 
   7  10   6    3.88    3.45   1 
   7 -10   7    7.14    3.43   1 
   7  10   7    5.75    3.77   1 
   7 -10   8    2.08    3.23   1 
   7  10   8    2.90    3.52   1 
   7 -10   9    1.45    3.46   1 
   7  10   9    0.19    3.48   1 
   7 -10  10   14.63    4.42   1 
   7  10  10    8.11    4.27   1 
   7 -10  11    1.63    3.51   1 
   7  10  11    0.34    3.79   1 
   7 -10  12   17.44    4.85   1 
   7  10  12   13.95    4.97   1 
   7 -10  13    3.91    4.00   1 
   7  10  13    2.06    4.21   1 
   7 -10  14   -0.02    4.04   1 
   7  10  14    0.00    4.49   1 
   7 -10  15   -1.42    4.14   1 
   7 -10  16    4.22    4.78   1 
   7  11 -13    2.98    4.74   1 
   7  11 -12   -1.81    4.44   1 
   7 -11 -11   13.58    3.66   1 
   7  11 -11    9.29    5.20   1 
   7 -11 -10    7.82    3.32   1 
   7  11 -10    9.50    4.84   1 
   7 -11  -9   37.80    5.06   1 
   7  11  -9   37.93    6.13   1 
   7 -11  -8   -0.32    2.84   1 
   7  11  -8    4.14    4.01   1 
   7 -11  -7   35.96    3.82   1 
   7  11  -7   38.54    5.96   1 
   7 -11  -6    5.46    2.91   1 
   7  11  -6    4.21    3.80   1 
   7 -11  -5    9.82    3.49   1 
   7  11  -5    6.90    3.90   1 
   7 -11  -4    2.50    2.82   1 
   7  11  -4    4.84    3.27   1 
   7 -11  -3   34.91    4.87   1 
   7  11  -3   36.17    5.60   1 
   7 -11  -2    0.31    2.55   1 
   7  11  -2    0.04    3.02   1 
   7 -11  -1   18.90    3.88   1 
   7  11  -1   15.45    4.20   1 
   7 -11   0    8.90    3.22   1 
   7  11   0    3.63    3.21   1 
   7 -11   1    1.89    2.64   1 
   7  11   1    3.63    3.53   1 
   7 -11   2    1.99    2.60   1 
   7  11   2    1.19    2.93   1 
   7 -11   3    3.40    2.88   1 
   7  11   3    1.51    3.09   1 
   7 -11   4    0.91    2.58   1 
   7  11   4    1.22    2.99   1 
   7 -11   5   -1.01    2.76   1 
   7  11   5    1.66    3.25   1 
   7 -11   6    1.65    3.09   1 
   7  11   6    0.33    3.04   1 
   7 -11   7    3.14    3.12   1 
   7  11   7    2.66    3.30   1 
   7 -11   8    0.81    3.17   1 
   7  11   8    1.48    3.28   1 
   7 -11   9   -1.73    3.15   1 
   7  11   9   -1.24    3.43   1 
   7 -11  10   -2.14    3.38   1 
   7  11  10    3.27    3.62   1 
   7 -11  11   14.79    5.11   1 
   7  11  11   20.29    5.17   1 
   7 -11  12    5.41    4.25   1 
   7  11  12    2.73    4.57   1 
   7 -11  13    1.07    4.12   1 
   7  11  13    2.37    4.67   1 
   7 -11  14   -2.08    4.40   1 
   7  11  14    0.83    4.85   1 
   7 -11  15    3.15    4.92   1 
   7  12 -14    3.94    5.56   1 
   7  12 -13   19.31    5.89   1 
   7  12 -12    3.80    5.33   1 
   7 -12 -11    3.89    3.60   1 
   7  12 -11    2.37    4.74   1 
   7 -12 -10    0.26    3.13   1 
   7  12 -10   -1.34    4.48   1 
   7 -12  -9   11.55    3.88   1 
   7  12  -9   11.83    5.22   1 
   7 -12  -8    6.24    3.31   1 
   7  12  -8    7.57    4.73   1 
   7 -12  -7   31.52    3.81   1 
   7  12  -7   35.62    6.33   1 
   7 -12  -6   12.07    3.63   1 
   7  12  -6    8.54    4.05   1 
   7 -12  -5   51.84    4.60   1 
   7  12  -5   55.70    5.76   1 
   7 -12  -4    2.95    2.82   1 
   7  12  -4    3.78    3.65   1 
   7 -12  -3    1.80    2.94   1 
   7  12  -3    0.92    3.62   1 
   7 -12  -2    4.22    2.91   1 
   7  12  -2    2.54    3.40   1 
   7 -12  -1    9.99    3.43   1 
   7  12  -1    3.63    3.59   1 
   7 -12   0    1.02    2.64   1 
   7  12   0   -1.33    3.08   1 
   7 -12   1   -0.18    2.66   1 
   7  12   1   -0.17    3.05   1 
   7 -12   2   18.30    4.26   1 
   7  12   2   16.57    4.76   1 
   7 -12   3   21.16    4.60   1 
   7  12   3   22.12    4.91   1 
   7 -12   4   -0.14    2.83   1 
   7  12   4   -1.61    3.29   1 
   7 -12   5    3.59    3.18   1 
   7  12   5    8.86    4.45   1 
   7 -12   6   -0.79    3.06   1 
   7  12   6   -0.93    3.58   1 
   7 -12   7   -2.97    3.07   1 
   7  12   7   -4.54    3.27   1 
   7 -12   8    4.47    3.94   1 
   7  12   8    0.21    3.50   1 
   7 -12   9   19.46    5.29   1 
   7  12   9   12.30    4.61   1 
   7 -12  10   -2.37    3.69   1 
   7  12  10    0.27    4.35   1 
   7 -12  11   -0.03    4.20   1 
   7  12  11   -4.24    4.54   1 
   7 -12  12    2.78    4.78   1 
   7  12  12    1.60    5.04   1 
   7 -12  13   10.32    5.23   1 
   7  12  13    6.01    5.06   1 
   7 -12  14   -1.32    4.89   1 
   7  13 -14    9.76    6.44   1 
   7  13 -13   -0.67    5.50   1 
   7  13 -12   -0.24    5.24   1 
   7  13 -11    2.54    5.17   1 
   7 -13 -10    2.91    3.63   1 
   7  13 -10    4.57    5.03   1 
   7 -13  -9    0.75    3.40   1 
   7  13  -9   -1.35    4.45   1 
   7 -13  -8   -1.54    3.00   1 
   7  13  -8   -0.66    4.45   1 
   7 -13  -7   25.35    4.75   1 
   7  13  -7   17.66    5.19   1 
   7 -13  -6    7.23    3.43   1 
   7  13  -6    6.70    4.47   1 
   7 -13  -5    5.43    3.38   1 
   7  13  -5    3.05    4.15   1 
   7 -13  -4    6.41    3.41   1 
   7  13  -4    0.95    4.03   1 
   7 -13  -3   10.17    3.68   1 
   7  13  -3    8.67    3.91   1 
   7 -13  -2   -2.87    2.72   1 
   7  13  -2   -1.04    3.53   1 
   7 -13  -1   -0.40    2.78   1 
   7  13  -1   -1.89    3.30   1 
   7 -13   0    0.91    2.84   1 
   7  13   0    1.70    3.45   1 
   7 -13   1   17.30    4.36   1 
   7  13   1   13.71    4.47   1 
   7 -13   2   -0.90    2.89   1 
   7  13   2    0.98    3.50   1 
   7 -13   3    2.48    3.14   1 
   7  13   3    0.26    3.67   1 
   7 -13   4   15.99    4.64   1 
   7  13   4   14.03    4.55   1 
   7 -13   5    0.65    3.18   1 
   7  13   5    1.64    3.68   1 
   7 -13   6    3.13    3.69   1 
   7  13   6    1.50    3.80   1 
   7 -13   7    0.74    3.70   1 
   7  13   7    0.95    3.85   1 
   7 -13   8    1.77    3.61   1 
   7  13   8    6.29    4.68   1 
   7 -13   9    0.36    4.06   1 
   7  13   9   -0.84    4.28   1 
   7 -13  10   20.79    5.77   1 
   7  13  10   18.56    5.57   1 
   7 -13  11    0.46    4.54   1 
   7  13  11   -1.34    4.81   1 
   7 -13  12    2.98    4.84   1 
   7  13  12    5.80    5.28   1 
   7 -13  13   -1.15    5.40   1 
   7  13  13   -5.55    5.15   1 
   7  14 -13   -0.58    5.70   1 
   7  14 -12    3.55    5.49   1 
   7  14 -11   -2.75    5.70   1 
   7 -14 -10    0.55    3.87   1 
   7  14 -10    0.82    4.97   1 
   7 -14  -9    6.81    3.89   1 
   7  14  -9    7.28    5.85   1 
   7 -14  -8   21.97    4.81   1 
   7  14  -8   19.34    6.12   1 
   7 -14  -7    3.41    3.47   1 
   7  14  -7    0.11    4.75   1 
   7 -14  -6    1.46    3.27   1 
   7  14  -6    1.03    4.68   1 
   7 -14  -5    3.19    3.24   1 
   7  14  -5    4.48    4.63   1 
   7 -14  -4    5.88    3.57   1 
   7  14  -4    7.87    4.52   1 
   7 -14  -3    3.55    3.64   1 
   7  14  -3    3.83    4.14   1 
   7 -14  -2    6.81    3.66   1 
   7  14  -2    6.40    4.66   1 
   7 -14  -1    4.61    3.55   1 
   7  14  -1    2.08    3.66   1 
   7 -14   0   14.19    4.31   1 
   7  14   0   11.71    4.70   1 
   7 -14   1    0.24    3.11   1 
   7  14   1   -0.33    3.74   1 
   7 -14   2   15.14    4.48   1 
   7  14   2   15.05    5.11   1 
   7 -14   3    0.22    3.28   1 
   7  14   3   -0.95    3.66   1 
   7 -14   4    7.71    3.99   1 
   7  14   4    7.49    4.32   1 
   7 -14   5    4.84    4.04   1 
   7  14   5    1.18    3.93   1 
   7 -14   6    4.09    3.98   1 
   7  14   6    4.25    4.38   1 
   7 -14   7   -0.29    3.86   1 
   7  14   7    3.78    4.36   1 
   7 -14   8   12.15    4.96   1 
   7  14   8   10.44    4.95   1 
   7 -14   9    2.64    4.58   1 
   7  14   9    3.40    4.54   1 
   7 -14  10    6.34    5.28   1 
   7  14  10   10.14    5.30   1 
   7 -14  11    6.22    5.49   1 
   7  14  11    0.90    4.96   1 
   7 -14  12   15.51    6.50   1 
   7  14  12   11.15    5.99   1 
   7  15 -13    3.19    6.44   1 
   7  15 -12   -2.52    5.96   1 
   7  15 -11   -1.47    5.46   1 
   7 -15 -10   16.96    5.36   1 
   7  15 -10   10.89    6.39   1 
   7 -15  -9   15.02    4.87   1 
   7  15  -9    9.48    5.86   1 
   7 -15  -8    7.73    4.49   1 
   7  15  -8    7.41    5.86   1 
   7 -15  -7   11.33    4.63   1 
   7  15  -7    7.65    5.35   1 
   7 -15  -6   12.66    4.42   1 
   7  15  -6    8.69    5.74   1 
   7 -15  -5   -0.20    3.37   1 
   7  15  -5   -1.07    4.22   1 
   7 -15  -4    1.27    3.70   1 
   7  15  -4   -0.39    4.45   1 
   7 -15  -3    0.15    3.38   1 
   7  15  -3    0.01    4.42   1 
   7 -15  -2    0.05    3.52   1 
   7  15  -2    1.93    4.10   1 
   7 -15  -1    3.94    3.65   1 
   7  15  -1    2.10    4.20   1 
   7 -15   0    6.61    3.80   1 
   7  15   0    6.23    4.60   1 
   7 -15   1   16.45    4.80   1 
   7  15   1   11.98    5.14   1 
   7 -15   2    0.43    3.30   1 
   7  15   2   -0.05    3.77   1 
   7 -15   3    2.34    3.72   1 
   7  15   3   -2.29    3.86   1 
   7 -15   4    2.20    3.81   1 
   7  15   4    0.60    4.18   1 
   7 -15   5   -1.19    3.65   1 
   7  15   5   -2.11    3.95   1 
   7 -15   6    1.91    3.97   1 
   7  15   6   -0.97    4.37   1 
   7 -15   7   11.92    5.17   1 
   7  15   7    9.18    5.34   1 
   7 -15   8    4.03    4.75   1 
   7  15   8   -0.28    4.67   1 
   7 -15   9    3.90    4.78   1 
   7  15   9    2.83    5.12   1 
   7 -15  10    6.89    5.42   1 
   7  15  10    4.60    5.60   1 
   7  16 -11    0.77    6.32   1 
   7 -16 -10    1.30    4.98   1 
   7  16 -10   -8.42    6.39   1 
   7 -16  -9   12.85    5.26   1 
   7  16  -9    8.31    6.34   1 
   7 -16  -8    3.18    4.48   1 
   7  16  -8    3.71    5.77   1 
   7 -16  -7   11.53    4.79   1 
   7  16  -7   10.87    6.44   1 
   7 -16  -6   -4.40    3.90   1 
   7  16  -6    1.16    5.53   1 
   7 -16  -5   26.64    5.71   1 
   7  16  -5   25.84    6.83   1 
   7 -16  -4    3.28    3.90   1 
   7  16  -4   -0.85    4.80   1 
   7 -16  -3   -0.02    3.83   1 
   7  16  -3   -1.27    4.47   1 
   7 -16  -2    2.21    4.00   1 
   7  16  -2   -1.30    4.69   1 
   7 -16  -1   11.71    4.66   1 
   7  16  -1    9.30    5.12   1 
   7 -16   0    2.86    3.87   1 
   7  16   0   -0.66    4.32   1 
   7 -16   1   -2.67    3.46   1 
   7  16   1    0.91    4.50   1 
   7 -16   2   -0.69    3.54   1 
   7  16   2    6.81    4.92   1 
   7 -16   3    8.49    4.62   1 
   7  16   3    7.40    5.23   1 
   7 -16   4    0.04    4.10   1 
   7  16   4   -3.02    4.69   1 
   7 -16   5    0.32    4.15   1 
   7  16   5    1.29    4.66   1 
   7 -16   6   -1.82    4.23   1 
   7  16   6    1.81    5.19   1 
   7 -16   7    0.09    4.73   1 
   7  16   7   -3.22    5.04   1 
   7 -16   8    6.08    5.33   1 
   7  16   8    2.60    4.89   1 
   7 -17  -8    0.27    4.75   1 
   7  17  -8   -2.07    6.02   1 
   7 -17  -7   26.05    6.10   1 
   7  17  -7   24.80    7.90   1 
   7 -17  -6    4.89    4.83   1 
   7  17  -6    1.40    5.85   1 
   7 -17  -5    0.04    4.21   1 
   7  17  -5    2.66    5.61   1 
   7 -17  -4    4.10    4.67   1 
   7  17  -4   -0.47    5.57   1 
   7 -17  -3   14.56    5.24   1 
   7  17  -3    8.89    5.87   1 
   7 -17  -2   -0.27    4.13   1 
   7  17  -2    1.08    4.96   1 
   7 -17  -1   -1.13    3.87   1 
   7  17  -1   -3.41    4.66   1 
   7 -17   0   12.44    4.85   1 
   7  17   0   14.03    5.86   1 
   7 -17   1    2.90    4.26   1 
   7  17   1    1.26    4.82   1 
   7 -17   2    1.93    4.03   1 
   7  17   2   -1.68    4.65   1 
   7 -17   3    0.99    4.40   1 
   7  17   3    1.75    4.84   1 
   7 -17   4    4.48    4.46   1 
   7  17   4   -0.17    4.70   1 
   7 -17   5    3.08    4.76   1 
   7  17   5    2.04    4.76   1 
   7 -17   6   -1.85    4.65   1 
   7  17   6   -0.87    4.87   1 
   7 -18  -4   -4.16    4.55   1 
   7  18  -4   -4.04    6.11   1 
   7 -18  -3   -0.47    4.54   1 
   7  18  -3   -1.65    5.52   1 
   7 -18  -2    1.93    4.36   1 
   7  18  -2    2.37    5.94   1 
   7 -18  -1   -2.98    4.06   1 
   7  18  -1   -0.44    5.59   1 
   7 -18   0    4.53    4.47   1 
   7  18   0    1.26    5.38   1 
   7 -18   1    0.45    4.01   1 
   7  18   1   -4.21    5.02   1 
   8   0 -10   23.34    2.07   1 
   8   0  -9    0.49    1.44   1 
   8   0  -8    0.57    1.55   1 
   8   0  -7    2.04    1.49   1 
   8   0  -6   54.81    2.90   1 
   8   0  -5   -0.80    1.30   1 
   8   0  -4  141.20    4.74   1 
   8   0  -3    9.07    2.00   1 
   8   0  -2  131.27    4.68   1 
   8   0  -1    1.15    1.32   1 
   8   0   0  270.92    6.89   1 
   8   0   2   16.40    2.83   1 
   8   0   3    6.06    2.16   1 
   8   0   4  337.76    8.82   1 
   8   0   5    4.70    2.03   1 
   8   0   6    0.87    1.81   1 
   8   0   7    2.15    2.04   1 
   8   0   8   59.17    4.25   1 
   8   0   9   -0.06    2.22   1 
   8   0  10    1.13    2.61   1 
   8   0  11    4.02    3.01   1 
   8   0  12   47.47    4.49   1 
   8   0  13    0.39    3.05   1 
   8   0  14    1.33    3.48   1 
   8   0  15   -1.82    3.33   1 
   8   0  16   -3.35    3.69   1 
   8   1 -10    7.45    2.17   1 
   8  -1  -9    4.98    1.77   1 
   8   1  -9    6.45    2.01   1 
   8  -1  -8   30.11    2.32   1 
   8   1  -8   31.86    2.47   1 
   8  -1  -7   39.12    2.58   1 
   8   1  -7   39.19    2.74   1 
   8  -1  -6   61.55    3.03   1 
   8   1  -6   59.86    3.23   1 
   8  -1  -5   24.14    2.06   1 
   8   1  -5   25.03    2.22   1 
   8  -1  -4  263.60    6.27   1 
   8   1  -4  265.34    6.70   1 
   8  -1  -3   25.60    2.26   1 
   8   1  -3   25.95    2.31   1 
   8  -1  -2   18.96    2.05   1 
   8   1  -2   18.74    2.17   1 
   8  -1  -1    1.88    1.39   1 
   8   1  -1    1.57    1.41   1 
   8  -1   0  141.75    5.13   1 
   8   1   0  149.41    5.39   1 
   8  -1   1    1.30    1.54   1 
   8   1   1    1.26    1.63   1 
   8  -1   2  168.15    5.88   1 
   8   1   2  155.61    5.80   1 
   8  -1   3  104.36    4.81   1 
   8   1   3  103.53    4.87   1 
   8  -1   4    1.83    1.79   1 
   8   1   4    0.21    1.77   1 
   8  -1   5   27.93    3.67   1 
   8   1   5   26.60    3.75   1 
   8  -1   6   21.91    3.42   1 
   8   1   6   27.08    3.87   1 
   8  -1   7    0.75    1.89   1 
   8   1   7    4.01    2.40   1 
   8  -1   8   13.26    3.08   1 
   8   1   8   10.58    3.13   1 
   8  -1   9    3.55    2.38   1 
   8   1   9    4.10    2.46   1 
   8  -1  10   29.83    3.53   1 
   8   1  10   35.21    3.82   1 
   8  -1  11    5.17    2.82   1 
   8   1  11    8.97    3.26   1 
   8  -1  12    2.21    2.76   1 
   8   1  12    4.57    3.32   1 
   8  -1  13   12.56    3.98   1 
   8   1  13   25.58    4.92   1 
   8  -1  14    0.57    3.33   1 
   8   1  14   -1.90    3.29   1 
   8  -1  15    3.97    3.76   1 
   8   1  15    1.47    3.52   1 
   8  -1  16    2.12    3.65   1 
   8   2 -11    0.09    1.94   1 
   8  -2 -10    5.35    1.77   1 
   8   2 -10    7.79    2.46   1 
   8  -2  -9   32.06    2.30   1 
   8   2  -9   36.55    2.87   1 
   8  -2  -8    3.46    1.53   1 
   8   2  -8    4.56    2.02   1 
   8  -2  -7   27.05    2.15   1 
   8   2  -7   30.14    2.62   1 
   8  -2  -6   98.67    3.81   1 
   8   2  -6   98.63    4.19   1 
   8  -2  -5   11.02    2.09   1 
   8   2  -5    9.40    2.25   1 
   8  -2  -4    0.53    1.26   1 
   8   2  -4    0.92    1.49   1 
   8  -2  -3   43.73    2.76   1 
   8   2  -3   44.66    3.04   1 
   8  -2  -2    0.49    1.30   1 
   8   2  -2   -0.18    1.38   1 
   8  -2  -1    1.75    1.43   1 
   8   2  -1    0.04    1.32   1 
   8  -2   0  140.29    5.13   1 
   8   2   0  134.38    5.28   1 
   8  -2   1  117.10    4.82   1 
   8   2   1  132.71    5.37   1 
   8  -2   2   17.57    2.80   1 
   8   2   2   16.43    2.87   1 
   8  -2   3   20.15    3.11   1 
   8   2   3   22.83    3.33   1 
   8  -2   4    7.52    2.27   1 
   8   2   4    6.69    2.36   1 
   8  -2   5   44.23    3.41   1 
   8   2   5   43.71    3.55   1 
   8  -2   6    9.46    2.56   1 
   8   2   6   15.15    3.20   1 
   8  -2   7   28.23    2.96   1 
   8   2   7   28.15    3.16   1 
   8  -2   8    0.66    2.11   1 
   8   2   8   -1.08    2.17   1 
   8  -2   9    3.76    2.53   1 
   8   2   9    4.30    2.64   1 
   8  -2  10    6.90    2.84   1 
   8   2  10   10.66    3.32   1 
   8  -2  11   24.50    4.27   1 
   8   2  11   24.56    4.28   1 
   8  -2  12    1.26    2.74   1 
   8   2  12   -1.37    2.76   1 
   8  -2  13    7.73    3.53   1 
   8   2  13   12.75    4.03   1 
   8  -2  14   -1.29    3.01   1 
   8   2  14    2.74    3.50   1 
   8  -2  15   -0.95    3.40   1 
   8   2  15   -1.60    3.66   1 
   8  -2  16    1.32    4.18   1 
   8   3 -12   19.10    3.18   1 
   8   3 -11    2.01    2.24   1 
   8  -3 -10   12.56    2.09   1 
   8   3 -10   19.60    3.05   1 
   8  -3  -9    2.28    1.53   1 
   8   3  -9    4.59    2.40   1 
   8  -3  -8    5.11    1.80   1 
   8   3  -8    4.82    2.16   1 
   8  -3  -7   20.70    2.05   1 
   8   3  -7   22.78    2.50   1 
   8  -3  -6    2.10    1.59   1 
   8   3  -6    3.79    2.01   1 
   8  -3  -5   84.03    3.52   1 
   8   3  -5   81.25    4.05   1 
   8  -3  -4    5.39    1.74   1 
   8   3  -4    1.83    1.80   1 
   8  -3  -3   50.84    2.99   1 
   8   3  -3   51.52    3.30   1 
   8  -3  -2    6.71    1.83   1 
   8   3  -2    1.16    1.66   1 
   8  -3  -1   22.45    2.26   1 
   8   3  -1   20.49    2.37   1 
   8  -3   0    0.72    1.41   1 
   8   3   0    1.24    1.63   1 
   8  -3   1    0.55    1.46   1 
   8   3   1    1.87    1.84   1 
   8  -3   2   22.66    2.40   1 
   8   3   2   23.71    2.65   1 
   8  -3   3   66.87    3.94   1 
   8   3   3   62.02    4.00   1 
   8  -3   4    1.49    1.64   1 
   8   3   4    2.19    1.81   1 
   8  -3   5   20.71    3.37   1 
   8   3   5   18.06    3.27   1 
   8  -3   6    3.28    2.11   1 
   8   3   6    0.65    1.99   1 
   8  -3   7    3.59    2.27   1 
   8   3   7    2.53    2.29   1 
   8  -3   8    2.72    2.24   1 
   8   3   8    4.16    2.54   1 
   8  -3   9   10.30    2.90   1 
   8   3   9    5.76    2.77   1 
   8  -3  10   27.51    4.17   1 
   8   3  10   28.09    4.57   1 
   8  -3  11   10.10    3.25   1 
   8   3  11    8.79    3.44   1 
   8  -3  12    1.52    2.79   1 
   8   3  12    2.64    3.13   1 
   8  -3  13    3.47    3.07   1 
   8   3  13    5.34    3.50   1 
   8  -3  14   -0.15    3.07   1 
   8   3  14    1.33    3.66   1 
   8  -3  15    1.53    3.37   1 
   8   3  15    3.39    3.82   1 
   8  -3  16    0.49    3.62   1 
   8   4 -12    1.39    2.56   1 
   8  -4 -11    5.86    1.91   1 
   8   4 -11    5.58    2.59   1 
   8  -4 -10   16.55    2.47   1 
   8   4 -10   18.21    3.49   1 
   8  -4  -9   15.74    2.30   1 
   8   4  -9   12.40    2.90   1 
   8  -4  -8   -0.36    1.49   1 
   8   4  -8    1.15    2.20   1 
   8  -4  -7    6.33    1.93   1 
   8   4  -7    6.72    2.57   1 
   8  -4  -6   62.23    3.22   1 
   8   4  -6   56.03    3.74   1 
   8  -4  -5   17.51    2.02   1 
   8   4  -5   16.16    3.02   1 
   8  -4  -4   35.05    2.61   1 
   8   4  -4   34.87    3.04   1 
   8  -4  -3    1.77    1.52   1 
   8   4  -3    1.25    1.90   1 
   8  -4  -2   17.70    2.08   1 
   8   4  -2   20.22    3.18   1 
   8  -4  -1   39.96    2.89   1 
   8   4  -1   37.98    3.05   1 
   8  -4   0   78.35    4.07   1 
   8   4   0   77.46    4.33   1 
   8  -4   1    6.07    2.09   1 
   8   4   1    3.20    1.87   1 
   8  -4   2    0.63    1.54   1 
   8   4   2    1.04    1.92   1 
   8  -4   3    3.73    1.91   1 
   8   4   3    2.97    2.11   1 
   8  -4   4   55.60    3.81   1 
   8   4   4   61.29    4.24   1 
   8  -4   5   26.44    3.70   1 
   8   4   5   29.28    4.13   1 
   8  -4   6   10.73    2.72   1 
   8   4   6    7.43    2.76   1 
   8  -4   7   -1.09    1.78   1 
   8   4   7    0.39    2.20   1 
   8  -4   8   22.86    3.73   1 
   8   4   8   26.53    4.37   1 
   8  -4   9    1.59    2.26   1 
   8   4   9    0.05    2.52   1 
   8  -4  10   -1.01    2.34   1 
   8   4  10   -0.11    2.70   1 
   8  -4  11   -0.60    2.57   1 
   8   4  11   -0.34    2.83   1 
   8  -4  12    1.51    2.66   1 
   8   4  12    5.27    3.16   1 
   8  -4  13    1.85    2.84   1 
   8   4  13    4.89    3.49   1 
   8  -4  14    8.19    3.69   1 
   8   4  14    8.71    4.10   1 
   8  -4  15   -1.67    3.27   1 
   8   4  15   -1.12    3.56   1 
   8  -4  16    1.01    3.57   1 
   8   5 -12    4.09    2.94   1 
   8  -5 -11   -0.51    1.73   1 
   8   5 -11    2.42    2.73   1 
   8  -5 -10    0.91    1.70   1 
   8   5 -10   -0.64    2.49   1 
   8  -5  -9    9.90    2.21   1 
   8   5  -9    7.48    2.72   1 
   8  -5  -8   77.17    3.63   1 
   8   5  -8   76.47    4.56   1 
   8  -5  -7   36.61    2.69   1 
   8   5  -7   33.37    3.45   1 
   8  -5  -6    0.61    1.51   1 
   8   5  -6    0.25    2.16   1 
   8  -5  -5   24.23    2.29   1 
   8   5  -5   17.14    3.26   1 
   8  -5  -4   93.70    4.15   1 
   8   5  -4   86.62    4.75   1 
   8  -5  -3    4.00    1.77   1 
   8   5  -3    4.14    2.26   1 
   8  -5  -2   20.04    2.25   1 
   8   5  -2   29.23    3.81   1 
   8  -5  -1    7.48    2.09   1 
   8   5  -1    5.82    2.30   1 
   8  -5   0   45.42    3.23   1 
   8   5   0   37.94    3.37   1 
   8  -5   1   24.47    3.42   1 
   8   5   1   19.96    3.39   1 
   8  -5   2  116.14    5.20   1 
   8   5   2  110.97    5.47   1 
   8  -5   3    0.56    1.85   1 
   8   5   3    2.85    2.19   1 
   8  -5   4    5.41    2.17   1 
   8   5   4    3.61    2.47   1 
   8  -5   5    1.04    2.02   1 
   8   5   5    1.57    2.17   1 
   8  -5   6   26.21    3.85   1 
   8   5   6   23.67    3.83   1 
   8  -5   7    1.01    2.15   1 
   8   5   7   -0.02    2.14   1 
   8  -5   8   -0.63    2.04   1 
   8   5   8   -0.81    2.30   1 
   8  -5   9    6.97    2.94   1 
   8   5   9    8.25    3.21   1 
   8  -5  10   14.40    3.50   1 
   8   5  10   13.25    3.78   1 
   8  -5  11   -0.99    2.50   1 
   8   5  11    0.11    2.96   1 
   8  -5  12   21.97    4.53   1 
   8   5  12   13.75    4.04   1 
   8  -5  13    3.62    3.23   1 
   8   5  13    4.46    3.55   1 
   8  -5  14    8.05    3.64   1 
   8   5  14    5.59    4.04   1 
   8  -5  15    1.58    3.53   1 
   8   5  15    0.86    3.92   1 
   8  -5  16    3.23    3.85   1 
   8   6 -13   11.69    3.85   1 
   8   6 -12   18.47    4.12   1 
   8  -6 -11    2.57    2.03   1 
   8   6 -11    2.49    3.19   1 
   8  -6 -10    2.36    1.85   1 
   8   6 -10   -0.54    2.65   1 
   8  -6  -9   31.78    2.65   1 
   8   6  -9   33.69    3.68   1 
   8  -6  -8    1.19    1.88   1 
   8   6  -8   -0.52    2.35   1 
   8  -6  -7   49.63    3.13   1 
   8   6  -7   50.30    4.11   1 
   8  -6  -6   27.59    2.52   1 
   8   6  -6   26.59    4.40   1 
   8  -6  -5    9.67    2.31   1 
   8   6  -5    3.86    2.41   1 
   8  -6  -4   85.21    4.17   1 
   8   6  -4   88.40    5.09   1 
   8  -6  -3   18.00    2.88   1 
   8   6  -3   13.71    3.26   1 
   8  -6  -2   46.52    3.29   1 
   8   6  -2   38.22    3.59   1 
   8  -6  -1   66.97    3.90   1 
   8   6  -1   63.64    4.35   1 
   8  -6   0    2.43    1.90   1 
   8   6   0    1.82    2.29   1 
   8  -6   1   57.32    3.93   1 
   8   6   1   51.83    4.01   1 
   8  -6   2   11.65    2.86   1 
   8   6   2   10.48    3.05   1 
   8  -6   3   46.34    3.60   1 
   8   6   3   46.48    3.87   1 
   8  -6   4   37.39    3.44   1 
   8   6   4   34.34    3.53   1 
   8  -6   5   11.08    3.04   1 
   8   6   5   11.02    3.08   1 
   8  -6   6   -0.57    2.05   1 
   8   6   6    0.30    2.28   1 
   8  -6   7    7.64    2.74   1 
   8   6   7    5.34    2.73   1 
   8  -6   8    2.69    2.43   1 
   8   6   8    1.55    2.59   1 
   8  -6   9    6.26    2.86   1 
   8   6   9    7.17    3.23   1 
   8  -6  10    1.31    2.79   1 
   8   6  10   -0.78    2.87   1 
   8  -6  11   22.48    4.50   1 
   8   6  11   26.11    4.76   1 
   8  -6  12    4.90    2.94   1 
   8   6  12    5.84    3.57   1 
   8  -6  13   -2.31    2.94   1 
   8   6  13   -0.73    3.52   1 
   8  -6  14   -0.43    3.28   1 
   8   6  14    1.64    3.86   1 
   8  -6  15    8.19    3.94   1 
   8   6  15    8.48    4.71   1 
   8  -6  16   -0.63    3.72   1 
   8   7 -13   11.68    4.23   1 
   8   7 -12   -1.76    3.29   1 
   8  -7 -11    1.99    2.20   1 
   8   7 -11    0.95    3.08   1 
   8  -7 -10    3.43    2.12   1 
   8   7 -10    7.04    3.32   1 
   8  -7  -9    4.43    2.04   1 
   8   7  -9    0.57    3.01   1 
   8  -7  -8    0.32    1.83   1 
   8   7  -8    1.45    2.86   1 
   8  -7  -7   21.76    2.44   1 
   8   7  -7   22.20    4.06   1 
   8  -7  -6    2.28    1.87   1 
   8   7  -6   -1.25    2.50   1 
   8  -7  -5   97.74    4.62   1 
   8   7  -5   99.78    5.75   1 
   8   7  -4    8.39    3.07   1 
   8  -7  -3    6.83    2.24   1 
   8   7  -3    3.15    2.50   1 
   8  -7  -2   16.22    2.92   1 
   8   7  -2   15.11    3.50   1 
   8  -7  -1   23.03    3.50   1 
   8   7  -1   22.30    3.83   1 
   8  -7   0    8.15    2.45   1 
   8   7   0    6.67    2.80   1 
   8  -7   1   -0.65    1.97   1 
   8   7   1   -0.22    2.35   1 
   8  -7   2    2.19    2.14   1 
   8   7   2    0.73    2.26   1 
   8  -7   3   83.77    4.87   1 
   8   7   3   87.23    5.42   1 
   8  -7   4   24.75    3.97   1 
   8   7   4   21.19    3.86   1 
   8  -7   5   42.67    3.79   1 
   8   7   5   38.16    3.89   1 
   8  -7   6    2.79    2.45   1 
   8   7   6    1.73    2.79   1 
   8  -7   7   15.57    3.58   1 
   8   7   7   10.59    3.40   1 
   8  -7   8   22.85    4.19   1 
   8   7   8   19.65    4.07   1 
   8  -7   9   18.29    3.98   1 
   8   7   9   13.98    3.94   1 
   8  -7  10   -1.43    2.73   1 
   8   7  10    1.10    3.01   1 
   8  -7  11    1.48    2.84   1 
   8   7  11   -0.97    3.11   1 
   8  -7  12    9.00    3.79   1 
   8   7  12    9.10    4.07   1 
   8  -7  13   22.71    4.81   1 
   8   7  13   23.61    5.01   1 
   8  -7  14    2.57    3.43   1 
   8   7  14    0.98    4.17   1 
   8  -7  15    0.24    3.53   1 
   8   7  15   -1.53    4.40   1 
   8  -7  16   -3.04    3.94   1 
   8   8 -13   15.00    4.91   1 
   8   8 -12    5.25    3.86   1 
   8  -8 -11   12.32    2.95   1 
   8   8 -11    9.64    4.05   1 
   8  -8 -10    1.85    2.13   1 
   8   8 -10   -1.63    3.39   1 
   8  -8  -9    4.83    2.39   1 
   8   8  -9    4.83    3.51   1 
   8  -8  -8   17.18    3.15   1 
   8   8  -8   16.81    4.05   1 
   8  -8  -7   24.27    2.70   1 
   8   8  -7   34.60    5.18   1 
   8  -8  -6   29.39    2.97   1 
   8   8  -6   33.86    5.24   1 
   8  -8  -5    6.97    2.37   1 
   8   8  -5    1.35    2.66   1 
   8  -8  -4    1.97    2.08   1 
   8   8  -4   -1.01    2.52   1 
   8  -8  -3   20.78    3.37   1 
   8   8  -3   16.41    3.94   1 
   8  -8  -2    3.92    2.29   1 
   8   8  -2    2.82    2.70   1 
   8  -8  -1    0.92    1.91   1 
   8   8  -1   -0.56    2.32   1 
   8  -8   0    1.95    2.13   1 
   8   8   0    1.33    2.48   1 
   8  -8   1   26.74    3.08   1 
   8   8   1   36.61    4.83   1 
   8  -8   2    1.24    2.21   1 
   8   8   2    1.92    2.64   1 
   8  -8   3   30.95    4.39   1 
   8   8   3   26.17    4.39   1 
   8  -8   4   29.31    4.45   1 
   8   8   4   32.90    4.88   1 
   8  -8   5    3.24    2.49   1 
   8   8   5    4.76    2.95   1 
   8  -8   6   41.93    4.19   1 
   8   8   6   37.83    4.16   1 
   8  -8   7    6.83    3.16   1 
   8   8   7    7.18    3.35   1 
   8  -8   8    4.96    3.07   1 
   8   8   8    6.27    3.50   1 
   8  -8   9    4.29    2.98   1 
   8   8   9    2.60    3.35   1 
   8  -8  10    2.67    3.11   1 
   8   8  10    4.09    3.66   1 
   8  -8  11    1.81    3.18   1 
   8   8  11    6.10    3.89   1 
   8  -8  12    6.50    3.68   1 
   8   8  12   10.81    4.32   1 
   8  -8  13    0.37    3.47   1 
   8   8  13   -1.10    3.69   1 
   8  -8  14    6.14    3.89   1 
   8   8  14    7.13    4.72   1 
   8  -8  15    0.04    3.34   1 
   8  -8  16   -2.88    3.81   1 
   8   9 -13    2.54    4.28   1 
   8   9 -12   24.76    5.51   1 
   8  -9 -11   10.69    2.99   1 
   8   9 -11   14.70    4.62   1 
   8  -9 -10    6.48    2.77   1 
   8   9 -10    7.81    3.82   1 
   8  -9  -9    8.01    2.82   1 
   8   9  -9    4.43    3.36   1 
   8  -9  -8   27.40    2.97   1 
   8   9  -8   35.94    4.32   1 
   8  -9  -7   12.18    3.01   1 
   8   9  -7   14.00    4.12   1 
   8  -9  -6    7.53    2.66   1 
   8   9  -6    5.97    3.57   1 
   8  -9  -5    5.94    2.50   1 
   8   9  -5    4.62    3.46   1 
   8  -9  -4   27.68    3.02   1 
   8   9  -4   30.82    3.83   1 
   8  -9  -3   15.21    3.18   1 
   8   9  -3   14.94    3.78   1 
   8  -9  -2    1.79    2.17   1 
   8   9  -2    1.50    2.70   1 
   8  -9  -1    0.24    2.08   1 
   8   9  -1   -0.99    2.51   1 
   8  -9   0   -0.54    2.13   1 
   8   9   0    0.36    2.76   1 
   8  -9   1    1.63    2.16   1 
   8   9   1    0.86    2.69   1 
   8  -9   2   20.58    3.89   1 
   8   9   2   19.49    4.30   1 
   8  -9   3    0.86    2.41   1 
   8   9   3    3.49    2.84   1 
   8  -9   4   -0.13    2.30   1 
   8   9   4   -1.39    2.60   1 
   8  -9   5    0.11    2.59   1 
   8   9   5    0.30    2.88   1 
   8  -9   6    9.28    3.46   1 
   8   9   6    6.31    3.23   1 
   8  -9   7    0.47    2.76   1 
   8   9   7    3.23    3.17   1 
   8  -9   8    1.11    3.02   1 
   8   9   8    1.20    3.19   1 
   8  -9   9   -0.58    2.96   1 
   8   9   9    1.54    3.08   1 
   8  -9  10   19.98    4.58   1 
   8   9  10   18.31    4.66   1 
   8  -9  11   -0.63    3.16   1 
   8   9  11    1.43    3.71   1 
   8  -9  12   17.38    4.73   1 
   8   9  12   17.62    5.06   1 
   8  -9  13   -1.90    3.42   1 
   8   9  13   -1.25    4.02   1 
   8  -9  14    1.33    3.98   1 
   8   9  14    1.37    4.54   1 
   8  -9  15    0.79    4.22   1 
   8  -9  16    6.72    4.58   1 
   8  10 -13    6.73    4.72   1 
   8  10 -12   -3.02    4.23   1 
   8 -10 -11    5.18    2.87   1 
   8  10 -11    3.01    4.13   1 
   8 -10 -10   18.93    3.63   1 
   8  10 -10   20.72    5.18   1 
   8 -10  -9    4.12    2.73   1 
   8  10  -9    6.12    3.85   1 
   8 -10  -8    1.18    2.57   1 
   8  10  -8    0.91    3.31   1 
   8 -10  -7    2.29    2.60   1 
   8  10  -7    1.99    3.56   1 
   8 -10  -6   26.73    3.13   1 
   8  10  -6   37.53    5.68   1 
   8 -10  -5    6.21    2.78   1 
   8  10  -5    3.82    3.36   1 
   8 -10  -4   12.16    3.32   1 
   8  10  -4    6.76    3.48   1 
   8 -10  -3    3.38    2.69   1 
   8  10  -3    8.62    3.95   1 
   8 -10  -2    2.73    2.40   1 
   8  10  -2    0.20    2.82   1 
   8 -10  -1    2.41    2.47   1 
   8  10  -1    0.75    2.68   1 
   8 -10   0   11.99    3.22   1 
   8  10   0    8.03    3.32   1 
   8 -10   1   18.04    3.89   1 
   8  10   1   12.84    3.95   1 
   8 -10   2    5.25    2.83   1 
   8  10   2    4.33    3.40   1 
   8 -10   3    8.02    3.23   1 
   8  10   3    9.49    3.90   1 
   8 -10   4   12.29    3.65   1 
   8  10   4   11.64    4.20   1 
   8 -10   5    1.42    2.97   1 
   8  10   5    0.94    3.50   1 
   8 -10   6    4.36    3.07   1 
   8  10   6    1.89    3.36   1 
   8 -10   7    0.64    3.11   1 
   8  10   7   -3.18    3.06   1 
   8 -10   8   12.72    4.06   1 
   8  10   8   10.92    4.42   1 
   8 -10   9   -0.26    3.63   1 
   8  10   9   -2.09    3.27   1 
   8 -10  10    3.17    3.55   1 
   8  10  10    2.22    4.14   1 
   8 -10  11    9.16    4.21   1 
   8  10  11    3.78    4.37   1 
   8 -10  12   10.15    4.59   1 
   8  10  12    8.22    5.18   1 
   8 -10  13   -4.10    3.49   1 
   8  10  13   -2.49    4.72   1 
   8 -10  14    1.68    4.28   1 
   8  10  14    4.50    5.44   1 
   8 -10  15    2.88    4.59   1 
   8 -10  16   -0.85    4.57   1 
   8  11 -13   23.04    5.77   1 
   8  11 -12    2.92    4.93   1 
   8 -11 -11   18.56    4.02   1 
   8  11 -11   15.93    5.44   1 
   8 -11 -10   -0.50    2.83   1 
   8  11 -10    2.27    4.14   1 
   8 -11  -9   20.06    4.12   1 
   8  11  -9   21.28    5.20   1 
   8 -11  -8    7.64    3.37   1 
   8  11  -8    9.29    4.16   1 
   8 -11  -7   17.03    4.00   1 
   8  11  -7   17.46    4.78   1 
   8 -11  -6    5.90    2.95   1 
   8  11  -6    0.77    3.67   1 
   8 -11  -5   69.11    4.95   1 
   8  11  -5   68.22    5.86   1 
   8 -11  -4   13.40    3.61   1 
   8  11  -4    7.08    4.01   1 
   8 -11  -3    3.63    2.89   1 
   8  11  -3   -0.90    3.16   1 
   8 -11  -2    7.44    3.10   1 
   8  11  -2    4.13    3.28   1 
   8 -11  -1   23.01    4.26   1 
   8  11  -1   17.92    4.70   1 
   8 -11   0   -0.25    2.48   1 
   8  11   0   -1.21    3.04   1 
   8 -11   1    6.64    3.05   1 
   8  11   1    4.76    3.54   1 
   8 -11   2    5.54    3.10   1 
   8  11   2    3.09    3.25   1 
   8 -11   3   31.89    5.01   1 
   8  11   3   27.41    5.08   1 
   8 -11   4    0.21    2.73   1 
   8  11   4    0.47    3.18   1 
   8 -11   5   16.41    4.21   1 
   8  11   5   14.51    4.40   1 
   8 -11   6    4.67    3.52   1 
   8  11   6    3.51    3.72   1 
   8 -11   7    2.28    3.12   1 
   8  11   7    2.67    3.62   1 
   8 -11   8   -2.29    3.28   1 
   8  11   8   -2.13    3.25   1 
   8 -11   9   10.02    4.39   1 
   8  11   9   11.24    4.46   1 
   8 -11  10    4.27    4.31   1 
   8  11  10    2.29    4.14   1 
   8 -11  11    6.17    4.40   1 
   8  11  11   -1.23    4.11   1 
   8 -11  12    0.43    4.11   1 
   8  11  12   -0.22    4.49   1 
   8 -11  13   12.31    5.10   1 
   8  11  13   11.83    5.36   1 
   8 -11  14    3.56    4.87   1 
   8  11  14    8.88    5.53   1 
   8 -11  15   -0.50    4.93   1 
   8  12 -13   21.93    6.75   1 
   8  12 -12   -2.01    4.84   1 
   8  12 -11   16.44    5.65   1 
   8 -12 -10    6.17    3.63   1 
   8  12 -10    3.86    4.70   1 
   8 -12  -9   26.86    4.86   1 
   8  12  -9   19.71    5.61   1 
   8 -12  -8    0.89    3.01   1 
   8  12  -8    0.73    3.93   1 
   8 -12  -7   38.86    4.12   1 
   8  12  -7   43.40    5.34   1 
   8 -12  -6    8.99    3.45   1 
   8  12  -6   10.19    4.40   1 
   8 -12  -5    4.02    3.02   1 
   8  12  -5    7.55    4.23   1 
   8 -12  -4    5.19    3.34   1 
   8  12  -4    4.28    3.82   1 
   8 -12  -3   13.08    3.62   1 
   8  12  -3   14.32    4.56   1 
   8 -12  -2   -0.26    2.83   1 
   8  12  -2   -0.69    3.38   1 
   8 -12  -1    4.21    2.96   1 
   8  12  -1    2.61    3.59   1 
   8 -12   0    3.18    3.09   1 
   8  12   0    0.24    3.25   1 
   8 -12   1   33.87    4.11   1 
   8  12   1   37.50    6.02   1 
   8 -12   2   -0.65    2.70   1 
   8  12   2    0.69    3.60   1 
   8 -12   3    5.21    3.37   1 
   8  12   3    5.84    3.79   1 
   8 -12   4    4.12    3.39   1 
   8  12   4    4.55    3.58   1 
   8 -12   5    4.14    3.37   1 
   8  12   5    1.36    3.44   1 
   8 -12   6    0.40    3.26   1 
   8  12   6    0.81    3.50   1 
   8 -12   7    2.57    3.56   1 
   8  12   7    1.28    3.87   1 
   8 -12   8    1.48    3.59   1 
   8  12   8    2.16    3.78   1 
   8 -12   9   10.35    4.72   1 
   8  12   9    9.38    4.59   1 
   8 -12  10    0.26    3.93   1 
   8  12  10    1.50    4.24   1 
   8 -12  11   19.68    5.99   1 
   8  12  11   15.93    5.41   1 
   8 -12  12    1.14    4.74   1 
   8  12  12    1.71    4.69   1 
   8 -12  13   -0.50    4.61   1 
   8  12  13    3.28    5.17   1 
   8 -12  14    3.96    5.15   1 
   8  13 -13    1.30    5.70   1 
   8  13 -12   13.36    5.80   1 
   8  13 -11   -1.30    5.09   1 
   8 -13 -10    2.10    3.61   1 
   8  13 -10    0.19    4.92   1 
   8 -13  -9    6.26    3.70   1 
   8  13  -9    7.20    5.14   1 
   8 -13  -8   18.52    4.45   1 
   8  13  -8   16.37    5.46   1 
   8 -13  -7    2.46    3.06   1 
   8  13  -7    1.81    4.20   1 
   8 -13  -6    1.45    3.11   1 
   8  13  -6    1.98    4.03   1 
   8 -13  -5    9.36    3.78   1 
   8  13  -5    8.67    4.62   1 
   8 -13  -4    3.78    3.17   1 
   8  13  -4    0.74    3.84   1 
   8 -13  -3    0.88    2.95   1 
   8  13  -3   -1.15    3.86   1 
   8 -13  -2    3.43    3.25   1 
   8  13  -2    4.16    3.82   1 
   8 -13  -1    1.31    3.28   1 
   8  13  -1    0.13    3.46   1 
   8 -13   0    6.93    3.72   1 
   8  13   0    5.36    4.21   1 
   8 -13   1    0.38    3.15   1 
   8  13   1   -1.02    3.27   1 
   8 -13   2    5.41    3.47   1 
   8  13   2    6.86    3.87   1 
   8 -13   3    3.26    3.34   1 
   8  13   3    3.85    4.15   1 
   8 -13   4   -0.20    3.46   1 
   8  13   4   -3.00    3.66   1 
   8 -13   5    2.45    3.65   1 
   8  13   5    0.46    3.79   1 
   8 -13   6    9.14    4.20   1 
   8  13   6    6.58    4.33   1 
   8 -13   7    3.53    3.78   1 
   8  13   7    2.45    4.42   1 
   8 -13   8    0.34    3.84   1 
   8  13   8    2.13    4.57   1 
   8 -13   9    6.76    4.61   1 
   8  13   9    4.66    4.99   1 
   8 -13  10    7.35    4.72   1 
   8  13  10   12.13    5.45   1 
   8 -13  11    2.69    5.13   1 
   8  13  11    1.83    4.76   1 
   8 -13  12    5.30    5.30   1 
   8  13  12    4.45    5.45   1 
   8 -13  13    3.67    5.52   1 
   8  13  13    5.34    6.03   1 
   8  14 -13    4.46    5.98   1 
   8  14 -12    8.68    6.65   1 
   8  14 -11   -2.85    5.33   1 
   8 -14 -10    8.06    4.26   1 
   8  14 -10    8.43    6.20   1 
   8 -14  -9   -1.75    3.51   1 
   8  14  -9    0.86    4.99   1 
   8 -14  -8    4.55    3.86   1 
   8  14  -8    4.21    5.05   1 
   8 -14  -7   -0.45    3.56   1 
   8  14  -7   -1.83    4.48   1 
   8 -14  -6   30.86    5.42   1 
   8  14  -6   20.61    6.03   1 
   8 -14  -5   -0.63    3.35   1 
   8  14  -5    0.43    3.93   1 
   8 -14  -4    2.39    3.32   1 
   8  14  -4    2.64    4.50   1 
   8 -14  -3    1.49    3.08   1 
   8  14  -3    1.10    3.88   1 
   8 -14  -2    1.86    3.34   1 
   8  14  -2    1.51    4.04   1 
   8 -14  -1    0.20    3.10   1 
   8  14  -1   -0.53    4.18   1 
   8 -14   0   -0.76    3.26   1 
   8  14   0    2.99    3.84   1 
   8 -14   1    2.23    3.47   1 
   8  14   1    1.82    4.10   1 
   8 -14   2   -0.62    3.35   1 
   8  14   2   -0.20    3.98   1 
   8 -14   3    5.48    3.96   1 
   8  14   3    8.11    4.58   1 
   8 -14   4    8.18    4.10   1 
   8  14   4    5.85    5.07   1 
   8 -14   5    2.06    4.11   1 
   8  14   5   -1.49    3.89   1 
   8 -14   6    1.98    4.17   1 
   8  14   6    2.96    4.35   1 
   8 -14   7    1.23    4.13   1 
   8  14   7   -2.41    4.00   1 
   8 -14   8    1.82    4.54   1 
   8  14   8    1.67    4.49   1 
   8 -14   9   -1.93    4.33   1 
   8  14   9   -1.17    4.50   1 
   8 -14  10   -1.10    4.95   1 
   8  14  10    2.53    4.99   1 
   8 -14  11   -1.01    4.83   1 
   8  14  11    7.17    5.68   1 
   8  15 -12    6.75    6.63   1 
   8  15 -11   -4.35    5.56   1 
   8 -15 -10   -0.84    4.18   1 
   8  15 -10   -0.40    5.90   1 
   8 -15  -9    5.30    4.50   1 
   8  15  -9    7.56    6.46   1 
   8 -15  -8    4.47    4.25   1 
   8  15  -8    7.01    5.60   1 
   8 -15  -7    3.72    4.18   1 
   8  15  -7    5.98    5.80   1 
   8 -15  -6   -0.38    3.82   1 
   8  15  -6   -4.29    4.63   1 
   8 -15  -5    5.36    4.02   1 
   8  15  -5    6.95    5.06   1 
   8 -15  -4    0.09    3.43   1 
   8  15  -4    1.18    4.48   1 
   8 -15  -3   -0.73    3.51   1 
   8  15  -3    0.75    4.24   1 
   8 -15  -2    1.93    3.67   1 
   8  15  -2   -0.54    3.84   1 
   8 -15  -1    6.53    4.04   1 
   8  15  -1    7.20    5.12   1 
   8 -15   0    0.89    3.71   1 
   8  15   0   -2.60    4.23   1 
   8 -15   1   -1.17    3.58   1 
   8  15   1   -2.17    4.19   1 
   8 -15   2    4.15    3.83   1 
   8  15   2    1.38    4.29   1 
   8 -15   3    9.43    4.33   1 
   8  15   3    4.74    5.02   1 
   8 -15   4    0.52    3.67   1 
   8  15   4   -0.77    3.97   1 
   8 -15   5    2.95    4.12   1 
   8  15   5    6.21    4.71   1 
   8 -15   6    5.00    4.45   1 
   8  15   6    4.70    4.30   1 
   8 -15   7   -0.33    4.49   1 
   8  15   7   -1.00    4.35   1 
   8 -15   8    2.35    4.63   1 
   8  15   8    0.77    4.67   1 
   8 -15   9    2.42    5.16   1 
   8  15   9    2.86    5.00   1 
   8 -15  10    3.70    5.60   1 
   8  15  10    2.95    5.26   1 
   8  16 -10    1.46    6.51   1 
   8 -16  -9    4.33    4.65   1 
   8  16  -9    6.26    6.76   1 
   8 -16  -8   -3.90    4.11   1 
   8  16  -8   -1.58    6.09   1 
   8 -16  -7   24.98    5.82   1 
   8  16  -7   19.20    6.78   1 
   8 -16  -6    1.42    4.07   1 
   8  16  -6    0.44    4.96   1 
   8 -16  -5   -1.98    3.75   1 
   8  16  -5    0.35    5.18   1 
   8 -16  -4    4.12    3.98   1 
   8  16  -4    6.53    5.46   1 
   8 -16  -3   14.41    4.83   1 
   8  16  -3    7.39    5.29   1 
   8 -16  -2    1.20    3.78   1 
   8  16  -2   -2.43    4.26   1 
   8 -16  -1    1.86    3.89   1 
   8  16  -1   -3.15    4.26   1 
   8 -16   0    3.31    4.27   1 
   8  16   0    0.38    4.79   1 
   8 -16   1   11.91    4.73   1 
   8  16   1   15.64    5.83   1 
   8 -16   2    3.86    4.15   1 
   8  16   2    4.42    5.06   1 
   8 -16   3    3.56    4.39   1 
   8  16   3   -0.69    4.11   1 
   8 -16   4    0.57    4.12   1 
   8  16   4    0.63    4.64   1 
   8 -16   5    1.18    4.33   1 
   8  16   5    3.43    4.84   1 
   8 -16   6    1.62    4.53   1 
   8  16   6    0.87    5.05   1 
   8 -16   7    3.85    4.78   1 
   8  16   7    2.26    5.19   1 
   8 -16   8   -1.44    4.89   1 
   8  16   8   -1.00    5.69   1 
   8 -17  -8    4.67    5.19   1 
   8 -17  -7    4.11    4.97   1 
   8  17  -7    3.52    6.65   1 
   8 -17  -6    3.44    4.57   1 
   8  17  -6   -3.14    5.52   1 
   8 -17  -5   30.42    6.54   1 
   8  17  -5   22.28    7.30   1 
   8 -17  -4    1.02    4.26   1 
   8  17  -4   -0.41    5.07   1 
   8 -17  -3    0.00    4.15   1 
   8  17  -3   -2.44    5.31   1 
   8 -17  -2   12.56    4.86   1 
   8  17  -2   11.08    5.73   1 
   8 -17  -1    5.91    4.62   1 
   8  17  -1    3.90    5.12   1 
   8 -17   0    8.82    4.99   1 
   8  17   0    1.58    4.98   1 
   8 -17   1   -2.30    4.09   1 
   8  17   1   -2.10    4.47   1 
   8 -17   2    2.48    4.36   1 
   8  17   2    2.37    5.04   1 
   8 -17   3    4.94    4.73   1 
   8  17   3    3.38    5.19   1 
   8 -17   4   -4.28    4.07   1 
   8  17   4   -1.46    5.27   1 
   8 -17   5   -0.91    4.67   1 
   8  17   5    2.20    5.41   1 
   9   0 -11   -0.73    1.77   1 
   9   0 -10    0.60    1.71   1 
   9   0  -9    0.45    1.68   1 
   9   0  -8   15.16    2.42   1 
   9   0  -7    4.11    1.89   1 
   9   0  -6  241.49    6.26   1 
   9   0  -5    2.14    1.57   1 
   9   0  -4   21.25    2.29   1 
   9   0  -3    3.48    1.83   1 
   9   0  -2  186.50    6.00   1 
   9   0  -1    1.44    1.50   1 
   9   0   0   23.47    2.44   1 
   9   0   1   -1.43    1.42   1 
   9   0   2  101.65    4.71   1 
   9   0   3    4.46    1.97   1 
   9   0   4    9.92    2.68   1 
   9   0   5    4.07    2.16   1 
   9   0   6   27.53    3.93   1 
   9   0   7   -1.27    2.00   1 
   9   0   8   12.50    3.16   1 
   9   0   9    1.69    2.56   1 
   9   0  10   32.03    3.86   1 
   9   0  11   -3.00    2.94   1 
   9   0  12   -1.90    2.89   1 
   9   0  13   -1.26    3.16   1 
   9   0  14    2.77    3.88   1 
   9   0  15    1.54    4.19   1 
   9   0  16   10.92    4.92   1 
   9  -1 -11    3.72    1.80   1 
   9   1 -11    7.31    2.35   1 
   9  -1 -10    4.48    1.87   1 
   9   1 -10    4.98    2.12   1 
   9  -1  -9   13.39    2.40   1 
   9   1  -9   12.64    2.55   1 
   9  -1  -8    2.07    1.67   1 
   9   1  -8    1.61    1.70   1 
   9  -1  -7   24.10    2.36   1 
   9   1  -7   24.62    2.41   1 
   9  -1  -6   80.91    3.72   1 
   9   1  -6   82.86    3.95   1 
   9  -1  -5    1.23    1.35   1 
   9   1  -5   -0.18    1.43   1 
   9  -1  -4  216.19    6.10   1 
   9   1  -4  222.79    6.50   1 
   9  -1  -3   24.74    2.34   1 
   9   1  -3   24.98    2.37   1 
   9  -1  -2   24.09    2.39   1 
   9   1  -2   22.27    2.43   1 
   9  -1  -1    2.17    1.51   1 
   9   1  -1    2.34    1.55   1 
   9  -1   0   35.04    2.90   1 
   9   1   0   35.13    3.03   1 
   9  -1   1   29.68    2.73   1 
   9   1   1   30.92    2.96   1 
   9  -1   2   41.32    3.21   1 
   9   1   2   38.99    3.24   1 
   9  -1   3    3.87    1.93   1 
   9   1   3    2.84    2.03   1 
   9  -1   4  129.23    5.73   1 
   9   1   4  130.33    5.90   1 
   9  -1   5    7.33    2.48   1 
   9   1   5    7.09    2.48   1 
   9  -1   6    4.19    2.26   1 
   9   1   6    3.05    2.40   1 
   9  -1   7   -0.73    1.96   1 
   9   1   7    2.20    2.34   1 
   9  -1   8    5.11    2.65   1 
   9   1   8    5.99    2.78   1 
   9  -1   9    4.48    2.79   1 
   9   1   9    5.97    2.92   1 
   9  -1  10    1.37    2.47   1 
   9   1  10   -0.05    2.61   1 
   9  -1  11   33.88    5.11   1 
   9   1  11   41.26    5.47   1 
   9  -1  12    2.84    3.07   1 
   9   1  12    2.77    3.29   1 
   9  -1  13    4.39    3.75   1 
   9   1  13    3.86    3.55   1 
   9  -1  14    2.36    3.69   1 
   9   1  14    2.78    3.75   1 
   9  -1  15    5.29    4.21   1 
   9   1  15    3.27    3.85   1 
   9  -1  16    0.63    4.46   1 
   9   1  16    1.53    4.22   1 
   9   2 -12    8.50    2.74   1 
   9  -2 -11    6.00    1.94   1 
   9   2 -11   10.12    2.90   1 
   9  -2 -10   12.08    2.22   1 
   9   2 -10   14.83    2.86   1 
   9  -2  -9    8.64    2.18   1 
   9   2  -9   10.10    2.47   1 
   9  -2  -8    2.71    1.75   1 
   9   2  -8    2.43    2.07   1 
   9  -2  -7   24.53    2.23   1 
   9   2  -7   24.16    2.52   1 
   9  -2  -6    1.21    1.48   1 
   9   2  -6    0.66    1.68   1 
   9  -2  -5   89.35    4.03   1 
   9   2  -5   85.06    4.25   1 
   9  -2  -4    2.91    1.66   1 
   9   2  -4    2.91    1.86   1 
   9  -2  -3    7.59    2.08   1 
   9   2  -3    8.05    2.22   1 
   9  -2  -2   12.95    2.45   1 
   9   2  -2   11.43    2.54   1 
   9  -2  -1    2.23    1.60   1 
   9   2  -1    2.01    1.67   1 
   9  -2   0  118.85    4.96   1 
   9   2   0  107.37    5.00   1 
   9  -2   1    3.71    1.83   1 
   9   2   1    2.18    1.94   1 
   9  -2   2    3.51    1.89   1 
   9   2   2    4.10    2.21   1 
   9  -2   3   16.50    3.05   1 
   9   2   3   16.14    3.14   1 
   9  -2   4   31.82    3.13   1 
   9   2   4   33.04    3.27   1 
   9  -2   5   34.81    3.23   1 
   9   2   5   32.90    3.33   1 
   9  -2   6    0.69    1.97   1 
   9   2   6    3.10    2.34   1 
   9  -2   7    3.54    2.28   1 
   9   2   7    4.92    2.57   1 
   9  -2   8   16.35    3.57   1 
   9   2   8   18.19    3.77   1 
   9  -2   9    1.45    2.39   1 
   9   2   9    0.57    2.86   1 
   9  -2  10    4.67    2.82   1 
   9   2  10    4.82    2.95   1 
   9  -2  11   -1.18    2.55   1 
   9   2  11   -1.51    2.86   1 
   9  -2  12    2.86    3.11   1 
   9   2  12    2.38    3.28   1 
   9  -2  13   21.36    4.52   1 
   9   2  13   19.81    4.66   1 
   9  -2  14   -0.32    3.38   1 
   9   2  14    2.51    3.62   1 
   9  -2  15    3.05    4.22   1 
   9   2  15   -0.19    3.99   1 
   9  -2  16    3.54    4.25   1 
   9   3 -12   -0.63    2.50   1 
   9  -3 -11   13.45    2.46   1 
   9   3 -11   16.60    3.15   1 
   9  -3 -10   10.37    2.21   1 
   9   3 -10   11.18    3.00   1 
   9  -3  -9   21.02    2.17   1 
   9   3  -9   23.46    2.75   1 
   9  -3  -8    6.47    1.95   1 
   9   3  -8    3.93    2.23   1 
   9  -3  -7   42.17    2.79   1 
   9   3  -7   42.42    3.29   1 
   9  -3  -6   33.61    2.61   1 
   9   3  -6   30.56    2.94   1 
   9  -3  -5   39.79    2.84   1 
   9   3  -5   34.40    3.03   1 
   9  -3  -4   61.63    3.44   1 
   9   3  -4   63.59    3.82   1 
   9  -3  -3  131.03    5.07   1 
   9   3  -3  128.30    5.50   1 
   9  -3  -2   12.18    2.46   1 
   9   3  -2    9.08    2.65   1 
   9  -3  -1    3.59    1.93   1 
   9   3  -1    2.43    1.90   1 
   9  -3   0    0.45    1.52   1 
   9   3   0    1.37    1.90   1 
   9  -3   1   25.85    2.65   1 
   9   3   1   29.13    3.01   1 
   9  -3   2    5.69    2.20   1 
   9   3   2    3.83    2.21   1 
   9  -3   3    1.42    1.86   1 
   9   3   3    0.12    1.79   1 
   9  -3   4    7.10    2.49   1 
   9   3   4    7.81    2.60   1 
   9  -3   5   20.13    3.52   1 
   9   3   5   18.93    3.54   1 
   9  -3   6   -0.80    1.96   1 
   9   3   6    1.74    2.13   1 
   9  -3   7    7.65    2.68   1 
   9   3   7    6.58    2.80   1 
   9  -3   8    2.99    2.35   1 
   9   3   8    3.08    2.65   1 
   9  -3   9    1.28    2.38   1 
   9   3   9   -0.53    2.64   1 
   9  -3  10    0.73    2.57   1 
   9   3  10   -0.90    2.55   1 
   9  -3  11   13.93    3.72   1 
   9   3  11   13.01    4.08   1 
   9  -3  12    2.16    2.93   1 
   9   3  12    0.44    3.27   1 
   9  -3  13    0.80    3.08   1 
   9   3  13    3.80    3.52   1 
   9  -3  14    3.84    3.42   1 
   9   3  14    3.89    3.92   1 
   9  -3  15   -0.27    3.59   1 
   9   3  15   -1.77    4.11   1 
   9  -3  16   -0.91    3.74   1 
   9   4 -12   33.09    3.27   1 
   9  -4 -11    0.40    1.85   1 
   9   4 -11   -0.41    2.70   1 
   9  -4 -10    1.98    1.81   1 
   9   4 -10    1.69    2.49   1 
   9  -4  -9   11.40    2.33   1 
   9   4  -9    6.61    2.81   1 
   9  -4  -8   30.10    2.56   1 
   9   4  -8   30.73    3.17   1 
   9  -4  -7   11.87    2.39   1 
   9   4  -7   11.52    2.95   1 
   9  -4  -6    2.97    1.73   1 
   9   4  -6    0.58    2.10   1 
   9  -4  -5   38.88    2.82   1 
   9   4  -5   39.29    3.35   1 
   9  -4  -4   48.13    3.18   1 
   9   4  -4   47.67    3.61   1 
   9  -4  -3   38.32    2.91   1 
   9   4  -3   29.57    3.08   1 
   9  -4  -2   18.85    2.27   1 
   9   4  -2   19.02    3.23   1 
   9  -4  -1   20.60    2.38   1 
   9   4  -1   19.50    3.19   1 
   9  -4   0   24.35    3.32   1 
   9   4   0   24.46    3.53   1 
   9  -4   1   72.63    4.14   1 
   9   4   1   62.98    4.31   1 
   9  -4   2   97.34    4.89   1 
   9   4   2   94.83    5.28   1 
   9  -4   3   37.85    3.36   1 
   9   4   3   30.43    3.34   1 
   9  -4   4    2.45    2.07   1 
   9   4   4    2.52    2.33   1 
   9  -4   5    4.36    2.31   1 
   9   4   5    3.39    2.55   1 
   9  -4   6   34.25    3.37   1 
   9   4   6   36.41    3.69   1 
   9  -4   7   16.05    3.46   1 
   9   4   7   11.04    3.45   1 
   9  -4   8   -0.72    2.18   1 
   9   4   8   -1.50    2.47   1 
   9  -4   9    2.75    2.66   1 
   9   4   9    1.87    2.88   1 
   9  -4  10   23.68    4.31   1 
   9   4  10   18.22    4.38   1 
   9  -4  11   -0.40    2.81   1 
   9   4  11    0.32    3.30   1 
   9  -4  12    3.79    3.15   1 
   9   4  12    5.51    3.73   1 
   9  -4  13    4.40    3.60   1 
   9   4  13    4.50    3.62   1 
   9  -4  14    2.75    3.40   1 
   9   4  14    5.10    3.95   1 
   9  -4  15    3.02    3.86   1 
   9   4  15    1.93    4.12   1 
   9  -4  16   -0.90    3.70   1 
   9   5 -12    0.49    2.92   1 
   9  -5 -11    0.16    1.97   1 
   9   5 -11   -2.56    2.68   1 
   9  -5 -10   18.10    2.78   1 
   9   5 -10   16.44    3.49   1 
   9  -5  -9    2.87    1.99   1 
   9   5  -9   -0.84    2.41   1 
   9  -5  -8    1.01    1.85   1 
   9   5  -8    0.82    2.57   1 
   9  -5  -7    8.65    2.28   1 
   9   5  -7    3.45    2.48   1 
   9  -5  -6  111.42    4.63   1 
   9   5  -6  104.11    5.36   1 
   9  -5  -5    4.86    2.01   1 
   9   5  -5    1.94    2.30   1 
   9  -5  -4   12.51    2.57   1 
   9   5  -4   10.91    3.00   1 
   9  -5  -3    2.04    1.81   1 
   9   5  -3   -0.21    1.87   1 
   9  -5  -2   43.26    3.20   1 
   9   5  -2   35.40    3.34   1 
   9  -5  -1    1.46    1.75   1 
   9   5  -1    1.45    2.17   1 
   9  -5   0   86.01    4.51   1 
   9   5   0   81.76    4.90   1 
   9  -5   1   15.63    3.01   1 
   9   5   1   11.72    3.06   1 
   9  -5   2   27.44    3.01   1 
   9   5   2   26.32    3.18   1 
   9  -5   3   12.85    2.95   1 
   9   5   3    9.81    2.97   1 
   9  -5   4   68.49    4.46   1 
   9   5   4   63.85    4.59   1 
   9  -5   5   -0.18    1.94   1 
   9   5   5   -0.72    2.20   1 
   9  -5   6    1.11    2.18   1 
   9   5   6    2.41    2.33   1 
   9  -5   7    1.45    2.31   1 
   9   5   7    2.65    2.70   1 
   9  -5   8   11.58    3.45   1 
   9   5   8   11.72    3.54   1 
   9  -5   9    3.85    2.59   1 
   9   5   9    3.38    2.96   1 
   9  -5  10    2.48    2.76   1 
   9   5  10    0.20    2.93   1 
   9  -5  11   -0.11    2.97   1 
   9   5  11   -1.26    2.97   1 
   9  -5  12   18.06    4.37   1 
   9   5  12   24.18    4.94   1 
   9  -5  13    2.72    3.32   1 
   9   5  13   -0.99    3.55   1 
   9   5  13   -0.91    3.56   1 
   9  -5  14    2.63    3.51   1 
   9   5  14    6.55    4.28   1 
   9  -5  15   -0.04    3.81   1 
   9   5  15    1.70    4.31   1 
   9  -5  16    0.02    3.98   1 
   9   6 -12   -0.71    3.16   1 
   9  -6 -11    7.07    2.40   1 
   9   6 -11    6.26    3.14   1 
   9  -6 -10    5.83    2.36   1 
   9   6 -10    5.76    3.31   1 
   9  -6  -9    5.28    2.10   1 
   9   6  -9   -0.09    2.80   1 
   9  -6  -8    5.02    2.09   1 
   9   6  -8    3.76    3.02   1 
   9  -6  -7   26.51    2.60   1 
   9   6  -7   31.53    4.71   1 
   9  -6  -6    9.37    2.43   1 
   9   6  -6    6.54    2.97   1 
   9  -6  -5   49.27    3.38   1 
   9   6  -5   48.47    4.18   1 
   9  -6  -4   28.46    2.72   1 
   9   6  -4   24.32    4.13   1 
   9  -6  -3   27.54    2.76   1 
   9   6  -3   27.50    3.26   1 
   9  -6  -2    4.16    2.05   1 
   9   6  -2   -1.27    2.07   1 
   9  -6  -1   21.58    3.34   1 
   9   6  -1   20.13    3.74   1 
   9  -6   0   50.84    3.75   1 
   9   6   0   43.17    3.89   1 
   9  -6   1    2.11    2.09   1 
   9   6   1   -0.54    2.11   1 
   9  -6   2   66.51    4.35   1 
   9   6   2   68.84    4.78   1 
   9  -6   3   32.37    3.38   1 
   9   6   3   28.39    3.43   1 
   9  -6   4    8.48    2.75   1 
   9   6   4    7.29    3.03   1 
   9  -6   5   33.59    3.55   1 
   9   6   5   32.56    3.70   1 
   9  -6   6   10.60    3.10   1 
   9   6   6   10.57    3.36   1 
   9  -6   7    8.33    3.01   1 
   9   6   7   11.34    3.52   1 
   9  -6   8    1.15    2.36   1 
   9   6   8    1.51    2.78   1 
   9  -6   9    6.40    3.05   1 
   9   6   9    3.49    3.09   1 
   9  -6  10   28.24    4.78   1 
   9   6  10   29.44    5.13   1 
   9  -6  11    4.97    2.97   1 
   9   6  11    7.61    3.82   1 
   9  -6  12    8.94    3.76   1 
   9   6  12    9.82    4.25   1 
   9  -6  13   20.03    4.95   1 
   9   6  13   23.77    5.29   1 
   9  -6  14    8.14    3.87   1 
   9   6  14    1.26    4.01   1 
   9  -6  15    2.06    4.05   1 
   9   6  15    0.05    4.53   1 
   9  -6  16    2.41    3.94   1 
   9   7 -13   17.59    4.55   1 
   9   7 -12    1.70    3.36   1 
   9  -7 -11    4.27    2.33   1 
   9   7 -11   -1.60    3.24   1 
   9  -7 -10    6.96    2.42   1 
   9   7 -10    7.78    3.53   1 
   9  -7  -9    6.99    2.45   1 
   9   7  -9    6.82    3.40   1 
   9  -7  -8   29.72    3.02   1 
   9   7  -8   34.84    4.90   1 
   9  -7  -7   38.55    3.20   1 
   9   7  -7   30.72    3.70   1 
   9  -7  -6   11.29    2.61   1 
   9   7  -6    5.83    3.40   1 
   9  -7  -5    2.96    1.99   1 
   9   7  -5    2.22    2.73   1 
   9  -7  -4   13.81    2.90   1 
   9   7  -4    7.31    3.12   1 
   9  -7  -3    4.05    2.09   1 
   9   7  -3   -0.78    2.43   1 
   9  -7  -2    1.75    1.92   1 
   9   7  -2    1.66    2.50   1 
   9  -7  -1   -0.15    1.95   1 
   9   7  -1   -0.90    2.30   1 
   9  -7   0   18.44    3.43   1 
   9   7   0   11.17    3.36   1 
   9  -7   1   36.19    3.56   1 
   9   7   1   34.20    3.74   1 
   9  -7   2    2.42    2.14   1 
   9   7   2    2.30    2.54   1 
   9  -7   3   32.90    4.47   1 
   9   7   3   27.31    4.44   1 
   9  -7   4    4.36    2.47   1 
   9   7   4    5.07    3.02   1 
   9  -7   5   21.26    3.92   1 
   9   7   5   22.96    4.26   1 
   9  -7   6    2.12    2.57   1 
   9   7   6    1.07    2.69   1 
   9  -7   7   15.52    3.74   1 
   9   7   7   17.06    4.06   1 
   9  -7   8    1.46    2.85   1 
   9   7   8    3.42    3.18   1 
   9  -7   9    7.12    3.36   1 
   9   7   9    4.93    3.36   1 
   9  -7  10    1.79    3.04   1 
   9   7  10    2.62    3.55   1 
   9  -7  11   21.21    4.56   1 
   9   7  11   18.88    4.85   1 
   9  -7  12    1.11    3.21   1 
   9   7  12    0.59    3.81   1 
   9  -7  13    1.19    3.47   1 
   9   7  13   -2.30    3.91   1 
   9  -7  14    0.81    3.59   1 
   9   7  14    2.14    4.30   1 
   9  -7  15   10.33    4.44   1 
   9   7  15   11.51    5.46   1 
   9  -7  16    1.65    3.95   1 
   9   8 -13    5.60    4.21   1 
   9   8 -12   19.87    4.91   1 
   9  -8 -11    6.85    2.81   1 
   9   8 -11    9.66    4.37   1 
   9  -8 -10    7.05    2.68   1 
   9   8 -10    5.03    3.79   1 
   9  -8  -9    4.50    2.51   1 
   9   8  -9    4.22    3.45   1 
   9  -8  -8   15.36    3.10   1 
   9   8  -8   14.66    4.03   1 
   9  -8  -7    4.46    2.37   1 
   9   8  -7    0.46    3.05   1 
   9  -8  -6   21.16    3.52   1 
   9   8  -6   17.78    4.08   1 
   9  -8  -5   38.41    3.40   1 
   9   8  -5   37.61    4.17   1 
   9  -8  -4   10.02    2.80   1 
   9   8  -4    5.21    3.29   1 
   9  -8  -3    3.41    2.26   1 
   9   8  -3   -0.44    2.70   1 
   9  -8  -2    3.46    2.27   1 
   9   8  -2    2.91    2.90   1 
   9  -8  -1   -1.26    1.86   1 
   9   8  -1   -1.31    2.47   1 
   9  -8   0    5.64    2.66   1 
   9   8   0    4.88    2.94   1 
   9  -8   1    0.28    2.16   1 
   9   8   1   -0.45    2.46   1 
   9  -8   2    8.46    2.91   1 
   9   8   2    7.06    3.29   1 
   9  -8   3   37.33    3.82   1 
   9   8   3   33.88    4.02   1 
   9  -8   4   32.15    3.81   1 
   9   8   4   35.56    5.30   1 
   9  -8   5   16.90    3.77   1 
   9   8   5   15.04    3.99   1 
   9  -8   6    5.83    3.05   1 
   9   8   6    5.13    3.37   1 
   9  -8   7    5.08    3.14   1 
   9   8   7    5.03    3.52   1 
   9  -8   8   -1.87    2.67   1 
   9   8   8    1.39    3.04   1 
   9  -8   9    8.63    3.69   1 
   9   8   9    6.06    3.73   1 
   9  -8  10   33.32    5.45   1 
   9   8  10   30.13    5.65   1 
   9  -8  11    0.53    3.16   1 
   9   8  11    4.96    3.99   1 
   9  -8  12    9.05    4.06   1 
   9   8  12    9.98    4.52   1 
   9  -8  13    8.49    4.09   1 
   9   8  13    6.58    4.69   1 
   9  -8  14   -0.39    3.63   1 
   9   8  14    0.49    4.78   1 
   9  -8  15    0.56    4.06   1 
   9  -8  16    1.84    4.32   1 
   9   9 -13    0.68    4.24   1 
   9   9 -12    5.67    4.29   1 
   9  -9 -11   -1.41    2.53   1 
   9   9 -11    0.27    3.50   1 
   9  -9 -10    5.64    2.83   1 
   9   9 -10    6.34    3.86   1 
   9  -9  -9    2.17    2.46   1 
   9   9  -9    0.32    3.37   1 
   9  -9  -8    6.83    2.82   1 
   9   9  -8    2.47    3.80   1 
   9  -9  -7    5.68    2.68   1 
   9   9  -7    7.52    3.68   1 
   9  -9  -6   17.48    3.42   1 
   9   9  -6   17.94    4.42   1 
   9  -9  -5    5.81    2.58   1 
   9   9  -5    1.23    3.15   1 
   9  -9  -4    0.41    2.19   1 
   9   9  -4    1.06    2.93   1 
   9  -9  -3    2.20    2.33   1 
   9   9  -3    1.83    3.04   1 
   9  -9  -2    1.24    2.32   1 
   9   9  -2   -2.20    2.74   1 
   9  -9  -1   12.39    3.23   1 
   9   9  -1   14.37    3.94   1 
   9  -9   0    1.48    2.30   1 
   9   9   0    1.67    2.96   1 
   9  -9   1    1.63    2.53   1 
   9   9   1    0.21    2.88   1 
   9  -9   2   -0.36    2.25   1 
   9   9   2    0.01    2.79   1 
   9  -9   3    7.42    3.16   1 
   9   9   3    4.52    3.18   1 
   9  -9   4   31.00    3.74   1 
   9   9   4   30.45    5.36   1 
   9  -9   5    0.52    2.61   1 
   9   9   5   -0.37    2.84   1 
   9  -9   6    7.40    3.54   1 
   9   9   6    7.64    3.58   1 
   9  -9   7   12.35    3.96   1 
   9   9   7   11.65    4.05   1 
   9  -9   8   19.48    4.58   1 
   9   9   8   15.07    4.38   1 
   9  -9   9    0.90    3.33   1 
   9   9   9    2.62    3.79   1 
   9  -9  10    7.24    3.76   1 
   9   9  10    4.54    4.11   1 
   9  -9  11   -0.31    3.34   1 
   9   9  11    0.13    4.00   1 
   9  -9  12   15.57    4.84   1 
   9   9  12   20.11    5.32   1 
   9  -9  13   -1.26    3.64   1 
   9   9  13   -2.88    4.22   1 
   9  -9  14   14.26    4.93   1 
   9   9  14   16.31    5.93   1 
   9  -9  15    1.42    4.06   1 
   9  -9  16    3.13    4.59   1 
   9  10 -13   -0.17    4.88   1 
   9  10 -12   28.98    5.83   1 
   9  10 -11    4.75    4.42   1 
   9 -10 -10    2.40    2.79   1 
   9  10 -10   -1.17    3.76   1 
   9 -10  -9   -1.90    2.53   1 
   9  10  -9   -0.65    3.53   1 
   9 -10  -8    1.50    2.68   1 
   9  10  -8   -2.11    3.22   1 
   9 -10  -7    1.81    2.76   1 
   9  10  -7    0.23    3.31   1 
   9 -10  -6    4.48    2.77   1 
   9  10  -6    3.16    3.53   1 
   9 -10  -5    7.81    3.15   1 
   9  10  -5    6.26    4.05   1 
   9 -10  -4   31.37    4.48   1 
   9  10  -4   30.04    5.22   1 
   9 -10  -3    4.15    2.65   1 
   9  10  -3    5.75    3.60   1 
   9 -10  -2    7.47    2.98   1 
   9  10  -2    6.20    3.45   1 
   9 -10  -1    2.83    2.70   1 
   9  10  -1    1.06    2.87   1 
   9 -10   0    7.76    3.18   1 
   9  10   0    8.33    3.75   1 
   9 -10   1    6.70    2.99   1 
   9  10   1    8.04    3.98   1 
   9 -10   2   23.58    4.42   1 
   9  10   2   22.63    4.89   1 
   9 -10   3   22.29    4.42   1 
   9  10   3   21.07    4.99   1 
   9 -10   4    2.71    2.90   1 
   9  10   4    2.57    3.45   1 
   9 -10   5   45.81    4.69   1 
   9  10   5   41.63    4.76   1 
   9 -10   6   37.99    4.43   1 
   9  10   6   38.04    4.73   1 
   9 -10   7    3.80    3.63   1 
   9  10   7    6.97    4.01   1 
   9 -10   8    1.42    3.29   1 
   9  10   8   -2.82    3.19   1 
   9 -10   9   13.59    4.53   1 
   9  10   9    9.58    4.43   1 
   9 -10  10   13.19    4.73   1 
   9  10  10    8.97    4.46   1 
   9 -10  11    6.78    4.11   1 
   9  10  11    3.61    4.35   1 
   9 -10  12    4.58    4.48   1 
   9  10  12    4.99    4.91   1 
   9 -10  13    4.59    4.34   1 
   9  10  13    6.49    5.19   1 
   9 -10  14    1.96    4.26   1 
   9  10  14    5.13    5.66   1 
   9 -10  15    0.49    4.77   1 
   9  11 -13   11.63    5.80   1 
   9  11 -12    4.59    4.95   1 
   9  11 -11    9.65    5.07   1 
   9 -11 -10    4.43    3.13   1 
   9  11 -10    6.47    4.72   1 
   9 -11  -9    0.69    3.01   1 
   9  11  -9    0.30    4.08   1 
   9 -11  -8    1.87    3.02   1 
   9  11  -8    1.61    3.79   1 
   9 -11  -7   22.97    4.27   1 
   9  11  -7   21.26    5.14   1 
   9 -11  -6   10.25    3.32   1 
   9  11  -6    5.44    4.03   1 
   9 -11  -5   -1.05    2.58   1 
   9  11  -5   -0.72    3.38   1 
   9 -11  -4    0.32    2.46   1 
   9  11  -4   -2.11    3.23   1 
   9 -11  -3   35.37    4.98   1 
   9  11  -3   30.64    5.83   1 
   9 -11  -2    0.84    2.65   1 
   9  11  -2    0.04    3.19   1 
   9 -11  -1    2.25    2.83   1 
   9  11  -1   -0.56    3.12   1 
   9 -11   0    6.94    3.25   1 
   9  11   0    4.12    3.54   1 
   9 -11   1   34.26    4.07   1 
   9  11   1   37.91    6.01   1 
   9 -11   2    5.12    3.13   1 
   9  11   2    6.77    3.64   1 
   9 -11   3   12.56    3.87   1 
   9  11   3    9.19    3.97   1 
   9 -11   4    3.47    3.35   1 
   9  11   4    1.24    3.51   1 
   9 -11   5   36.78    5.70   1 
   9  11   5   28.97    5.72   1 
   9 -11   6    2.65    3.52   1 
   9  11   6    1.36    3.81   1 
   9 -11   7   42.78    4.90   1 
   9  11   7   35.35    6.48   1 
   9 -11   8   -1.98    3.48   1 
   9  11   8    3.84    4.45   1 
   9 -11   9    8.23    4.37   1 
   9  11   9    5.68    4.58   1 
   9 -11  10   -0.92    3.96   1 
   9  11  10   -2.21    4.30   1 
   9 -11  11   12.84    5.42   1 
   9  11  11   13.25    5.55   1 
   9 -11  12    0.55    4.22   1 
   9  11  12    2.62    5.04   1 
   9 -11  13   -0.87    4.48   1 
   9  11  13   -1.73    5.03   1 
   9 -11  14   -3.43    4.52   1 
   9  11  14    0.60    5.37   1 
   9  12 -13   11.39    5.95   1 
   9  12 -12    8.26    5.65   1 
   9  12 -11    7.84    5.23   1 
   9 -12 -10    4.28    3.43   1 
   9  12 -10    5.51    4.99   1 
   9 -12  -9    3.83    3.41   1 
   9  12  -9   -0.37    4.14   1 
   9 -12  -8    2.96    3.24   1 
   9  12  -8    1.01    4.26   1 
   9 -12  -7   11.53    3.76   1 
   9  12  -7    7.74    4.46   1 
   9 -12  -6    3.37    3.13   1 
   9  12  -6    6.18    4.44   1 
   9 -12  -5   10.75    3.56   1 
   9  12  -5   16.80    4.85   1 
   9 -12  -4   -0.82    2.77   1 
   9  12  -4   -1.26    3.63   1 
   9 -12  -3    0.03    2.67   1 
   9  12  -3   -1.57    3.51   1 
   9 -12  -2   -1.23    2.44   1 
   9  12  -2   -2.10    3.46   1 
   9 -12  -1    3.63    3.17   1 
   9  12  -1    1.99    3.66   1 
   9 -12   0   -2.85    2.59   1 
   9  12   0    0.28    3.78   1 
   9 -12   1   -0.30    3.03   1 
   9  12   1   -2.19    3.31   1 
   9 -12   2    5.29    3.47   1 
   9  12   2   10.01    4.07   1 
   9 -12   3   23.45    4.95   1 
   9  12   3   24.57    5.49   1 
   9 -12   4    1.05    3.36   1 
   9  12   4   -0.28    3.41   1 
   9 -12   5   28.82    5.74   1 
   9  12   5   18.47    4.96   1 
   9 -12   6    1.60    3.56   1 
   9  12   6    0.35    3.73   1 
   9 -12   7    7.07    4.19   1 
   9  12   7    6.79    4.43   1 
   9 -12   8   -0.69    3.71   1 
   9  12   8   -0.77    3.88   1 
   9 -12   9   28.06    6.42   1 
   9  12   9   21.91    5.61   1 
   9 -12  10    7.30    4.73   1 
   9  12  10    7.83    4.90   1 
   9 -12  11    3.96    4.78   1 
   9  12  11    4.67    4.94   1 
   9 -12  12    0.01    4.70   1 
   9  12  12   -2.53    4.87   1 
   9 -12  13    8.61    5.41   1 
   9  12  13   10.82    6.29   1 
   9  13 -13    5.72    5.90   1 
   9  13 -12   -3.35    5.59   1 
   9  13 -11   -2.32    4.81   1 
   9 -13 -10    0.51    3.63   1 
   9  13 -10    0.97    4.94   1 
   9 -13  -9    9.62    4.05   1 
   9  13  -9    9.84    5.44   1 
   9 -13  -8    9.00    4.18   1 
   9  13  -8    5.73    4.87   1 
   9 -13  -7   12.27    4.21   1 
   9  13  -7   12.80    5.23   1 
   9 -13  -6   23.05    4.90   1 
   9  13  -6   18.35    5.50   1 
   9 -13  -5    3.27    3.33   1 
   9  13  -5    3.93    4.47   1 
   9 -13  -4    2.41    3.34   1 
   9  13  -4    1.41    4.01   1 
   9 -13  -3    1.89    3.19   1 
   9  13  -3    1.67    3.98   1 
   9 -13  -2   -0.44    2.84   1 
   9  13  -2    2.97    3.95   1 
   9 -13  -1    1.28    3.02   1 
   9  13  -1    0.76    3.71   1 
   9 -13   0    0.60    3.16   1 
   9  13   0    1.15    3.75   1 
   9 -13   1    6.26    3.68   1 
   9  13   1    2.43    4.11   1 
   9 -13   2    6.87    3.78   1 
   9  13   2    1.70    4.00   1 
   9 -13   3    7.31    3.75   1 
   9  13   3    4.88    4.66   1 
   9 -13   4   14.62    4.41   1 
   9  13   4    8.45    5.17   1 
   9 -13   5   -2.15    3.37   1 
   9  13   5   -1.67    4.09   1 
   9 -13   6    0.90    3.64   1 
   9  13   6   -2.25    3.82   1 
   9 -13   7    4.92    4.00   1 
   9  13   7    1.01    4.16   1 
   9 -13   8    6.99    4.73   1 
   9  13   8    5.94    4.80   1 
   9 -13   9   11.69    5.44   1 
   9  13   9    5.34    4.73   1 
   9 -13  10    1.35    4.75   1 
   9  13  10   -0.01    4.84   1 
   9 -13  11    7.16    5.39   1 
   9  13  11    1.23    5.31   1 
   9 -13  12   -0.18    5.28   1 
   9  13  12    6.28    6.16   1 
   9  14 -13   -3.65    6.46   1 
   9  14 -12    2.07    5.77   1 
   9  14 -11   -2.49    5.85   1 
   9 -14 -10    2.42    4.07   1 
   9  14 -10    5.75    5.69   1 
   9 -14  -9    0.48    3.92   1 
   9  14  -9   -1.67    4.76   1 
   9 -14  -8   22.10    5.30   1 
   9  14  -8   14.07    5.83   1 
   9 -14  -7    5.86    4.18   1 
   9  14  -7    3.92    5.00   1 
   9 -14  -6    2.54    3.65   1 
   9  14  -6    0.74    4.30   1 
   9 -14  -5    1.43    3.49   1 
   9  14  -5    5.19    4.79   1 
   9 -14  -4    2.59    3.62   1 
   9  14  -4    3.04    4.17   1 
   9 -14  -3   -1.21    3.10   1 
   9  14  -3   -0.13    4.07   1 
   9 -14  -2    1.68    3.30   1 
   9  14  -2   -1.69    4.00   1 
   9 -14  -1    1.75    3.47   1 
   9  14  -1   -1.15    3.76   1 
   9 -14   0   -0.16    3.24   1 
   9  14   0   -0.83    3.78   1 
   9 -14   1   -1.52    3.21   1 
   9  14   1    2.34    4.25   1 
   9 -14   2    0.50    3.51   1 
   9  14   2    4.61    4.28   1 
   9 -14   3    5.07    4.01   1 
   9  14   3    8.05    4.87   1 
   9 -14   4    0.72    3.77   1 
   9  14   4   -4.99    3.88   1 
   9 -14   5   -0.50    3.83   1 
   9  14   5    3.61    4.60   1 
   9 -14   6    3.74    4.24   1 
   9  14   6    2.69    4.77   1 
   9 -14   7   -1.31    4.11   1 
   9  14   7    0.97    4.60   1 
   9 -14   8    2.03    4.71   1 
   9  14   8    0.82    4.98   1 
   9 -14   9    0.26    4.62   1 
   9  14   9   -2.51    5.03   1 
   9 -14  10    9.47    5.64   1 
   9  14  10    8.06    5.95   1 
   9  15 -12    3.57    6.43   1 
   9  15 -11   -4.03    6.28   1 
   9  15 -10    3.04    6.54   1 
   9 -15  -9    4.21    4.73   1 
   9  15  -9   -0.29    5.80   1 
   9 -15  -8    1.33    4.32   1 
   9  15  -8    2.41    5.40   1 
   9 -15  -7    0.60    4.31   1 
   9  15  -7    0.50    5.04   1 
   9 -15  -6    7.66    4.65   1 
   9  15  -6    3.73    5.26   1 
   9 -15  -5    0.20    3.97   1 
   9  15  -5   -2.05    4.21   1 
   9 -15  -4    1.96    3.73   1 
   9  15  -4   -0.91    4.80   1 
   9 -15  -3    7.04    4.11   1 
   9  15  -3    4.75    5.10   1 
   9 -15  -2    2.60    3.60   1 
   9  15  -2   -0.66    4.22   1 
   9 -15  -1   -0.71    3.49   1 
   9  15  -1   -3.33    4.35   1 
   9 -15   0    0.90    3.76   1 
   9  15   0   -1.09    4.41   1 
   9 -15   1    7.27    4.32   1 
   9  15   1    8.79    4.77   1 
   9 -15   2   -2.47    3.29   1 
   9  15   2   -3.74    4.35   1 
   9 -15   3    0.64    3.84   1 
   9  15   3    0.29    4.30   1 
   9 -15   4   -0.49    4.22   1 
   9  15   4   -0.91    4.39   1 
   9 -15   5    1.22    4.13   1 
   9  15   5    1.38    4.58   1 
   9 -15   6   -0.43    4.24   1 
   9  15   6   -2.60    4.62   1 
   9 -15   7    0.78    4.74   1 
   9  15   7   -0.87    4.81   1 
   9 -15   8    1.77    5.13   1 
   9  15   8    3.28    5.45   1 
   9 -15   9    0.65    4.87   1 
   9  15   9   -6.29    5.01   1 
   9  16 -10    1.30    7.08   1 
   9 -16  -9    4.20    5.22   1 
   9  16  -9    6.14    6.55   1 
   9 -16  -8    0.48    4.62   1 
   9  16  -8    1.12    6.01   1 
   9 -16  -7    6.57    4.85   1 
   9  16  -7    2.53    5.66   1 
   9 -16  -6    2.68    4.34   1 
   9  16  -6   -3.90    5.42   1 
   9 -16  -5   25.65    6.04   1 
   9  16  -5   15.64    6.33   1 
   9 -16  -4    1.60    4.21   1 
   9  16  -4   -1.86    5.09   1 
   9 -16  -3    0.47    4.28   1 
   9  16  -3    1.01    4.52   1 
   9 -16  -2    1.94    4.20   1 
   9  16  -2    2.52    5.09   1 
   9 -16  -1   14.24    5.10   1 
   9  16  -1   12.36    6.14   1 
   9 -16   0    1.93    3.92   1 
   9  16   0    0.31    4.55   1 
   9 -16   1   -2.98    3.51   1 
   9  16   1   -0.84    4.60   1 
   9 -16   2    1.98    4.19   1 
   9  16   2    1.52    5.01   1 
   9 -16   3   14.89    5.28   1 
   9  16   3   10.83    5.47   1 
   9 -16   4    0.15    4.24   1 
   9  16   4   -0.02    4.89   1 
   9 -16   5    3.48    4.46   1 
   9  16   5    5.89    5.33   1 
   9 -16   6   -1.76    4.40   1 
   9  16   6   -0.99    4.99   1 
   9 -17  -6   11.62    5.51   1 
   9  17  -6    7.13    6.21   1 
   9 -17  -5   -0.86    4.66   1 
   9  17  -5   -2.11    5.56   1 
   9 -17  -4   10.98    5.30   1 
   9  17  -4   -3.35    5.32   1 
   9 -17  -3    7.02    4.89   1 
   9  17  -3    5.45    5.55   1 
   9 -17  -2    2.87    4.36   1 
   9  17  -2   -0.23    4.82   1 
   9 -17  -1   -0.02    4.24   1 
   9  17  -1   -3.09    4.78   1 
   9 -17   0    0.35    4.19   1 
   9  17   0   -1.03    5.00   1 
   9 -17   1    4.01    4.46   1 
   9  17   1    3.60    5.46   1 
   9 -17   2    1.89    4.47   1 
   9  17   2   -0.95    5.25   1 
   9 -17   3    6.81    5.17   1 
   9  17   3    3.08    5.63   1 
  10   0 -11   -2.92    1.96   1 
  10   0 -10   11.59    2.48   1 
  10   0  -9    0.06    1.89   1 
  10   0  -8   -0.66    1.70   1 
  10   0  -7    0.11    1.79   1 
  10   0  -6  111.11    4.65   1 
  10   0  -5    0.34    1.56   1 
  10   0  -4   41.57    3.18   1 
  10   0  -3    0.44    1.69   1 
  10   0  -2   28.88    2.85   1 
  10   0  -1   -0.80    1.48   1 
  10   0   0   11.49    2.62   1 
  10   0   1   -0.25    1.54   1 
  10   0   2   16.61    3.16   1 
  10   0   3    2.56    1.97   1 
  10   0   4   64.76    4.39   1 
  10   0   5   -0.24    1.94   1 
  10   0   6    2.58    2.39   1 
  10   0   7    3.35    2.44   1 
  10   0   8   15.04    3.61   1 
  10   0   9   -1.00    2.64   1 
  10   0  10    7.96    3.54   1 
  10   0  11    2.39    3.20   1 
  10   0  12   18.86    4.65   1 
  10   0  13   -0.71    3.59   1 
  10   0  14   20.33    5.00   1 
  10   0  15   -1.28    4.02   1 
  10   0  16    2.52    4.58   1 
  10  -1 -11   20.42    2.99   1 
  10   1 -11   26.97    3.41   1 
  10  -1 -10   13.82    2.59   1 
  10   1 -10   14.88    2.86   1 
  10  -1  -9   -0.19    1.89   1 
  10   1  -9    0.64    1.94   1 
  10  -1  -8    6.24    2.09   1 
  10   1  -8    4.52    2.14   1 
  10  -1  -7    2.59    1.93   1 
  10   1  -7    2.56    2.00   1 
  10  -1  -6   20.50    2.32   1 
  10   1  -6   21.93    2.54   1 
  10  -1  -5   20.20    2.31   1 
  10   1  -5   20.79    2.44   1 
  10  -1  -4   60.47    3.67   1 
  10   1  -4   55.45    3.55   1 
  10  -1  -3    1.05    1.53   1 
  10   1  -3    1.73    1.77   1 
  10  -1  -2   21.93    3.12   1 
  10   1  -2   27.16    3.64   1 
  10  -1  -1    8.09    2.25   1 
  10   1  -1   10.43    2.48   1 
  10  -1   0   22.29    3.29   1 
  10   1   0   22.54    3.41   1 
  10  -1   1    2.13    2.08   1 
  10   1   1    1.80    1.97   1 
  10  -1   2   60.63    4.08   1 
  10   1   2   50.99    3.88   1 
  10  -1   3   39.94    3.48   1 
  10   1   3   40.04    3.58   1 
  10  -1   4    2.96    2.06   1 
  10   1   4    2.37    2.26   1 
  10  -1   5   14.60    3.18   1 
  10   1   5   12.62    3.12   1 
  10  -1   6   18.46    3.57   1 
  10   1   6   17.91    3.74   1 
  10  -1   7   -1.47    2.03   1 
  10   1   7   -1.66    2.07   1 
  10  -1   8   -0.37    2.35   1 
  10   1   8   -0.17    2.25   1 
  10  -1   9    5.08    2.75   1 
  10   1   9    5.74    3.02   1 
  10  -1  10   18.62    4.23   1 
  10   1  10   21.12    4.48   1 
  10  -1  11    1.85    3.08   1 
  10   1  11    0.73    2.82   1 
  10  -1  12   -2.55    3.09   1 
  10   1  12    0.90    3.35   1 
  10  -1  13    7.30    4.05   1 
  10   1  13    5.16    3.96   1 
  10  -1  14   -1.50    3.78   1 
  10   1  14    1.43    3.93   1 
  10  -1  15   -0.14    3.76   1 
  10   1  15   -0.07    3.68   1 
  10  -1  16    4.46    4.87   1 
  10   1  16    4.77    4.58   1 
  10  -2 -11   23.89    2.53   1 
  10   2 -11   33.15    3.16   1 
  10  -2 -10    0.87    1.80   1 
  10   2 -10   -0.54    2.08   1 
  10  -2  -9   23.29    3.25   1 
  10   2  -9   23.45    3.35   1 
  10  -2  -8    8.45    2.17   1 
  10   2  -8   11.21    2.81   1 
  10  -2  -7   44.50    3.05   1 
  10   2  -7   41.50    3.30   1 
  10  -2  -6   22.61    2.99   1 
  10   2  -6   22.89    3.44   1 
  10  -2  -5   40.08    2.97   1 
  10   2  -5   42.21    3.29   1 
  10  -2  -4    1.34    1.73   1 
  10   2  -4    2.82    1.91   1 
  10  -2  -3  100.00    4.64   1 
  10   2  -3   96.65    4.82   1 
  10  -2  -2    0.30    1.62   1 
  10   2  -2    0.27    1.64   1 
  10  -2  -1   14.07    2.70   1 
  10   2  -1   13.23    2.82   1 
  10  -2   0    2.39    1.74   1 
  10   2   0    4.10    2.21   1 
  10  -2   1   38.85    3.19   1 
  10   2   1   39.99    3.49   1 
  10  -2   2    2.56    2.00   1 
  10   2   2    2.50    2.00   1 
  10  -2   3    4.33    2.20   1 
  10   2   3    5.96    2.43   1 
  10  -2   4    4.38    2.31   1 
  10   2   4    4.37    2.40   1 
  10  -2   5   11.64    3.05   1 
  10   2   5   11.90    3.25   1 
  10  -2   6    7.09    2.86   1 
  10   2   6    7.43    2.91   1 
  10  -2   7    4.87    2.65   1 
  10   2   7    5.37    2.84   1 
  10  -2   8   -1.45    2.22   1 
  10   2   8   -0.97    2.39   1 
  10  -2   9    2.82    2.57   1 
  10   2   9    2.27    2.98   1 
  10  -2  10    5.15    3.01   1 
  10   2  10    4.40    3.24   1 
  10  -2  11   21.96    4.70   1 
  10   2  11   23.94    4.83   1 
  10  -2  12   -0.13    3.20   1 
  10   2  12    1.63    3.36   1 
  10  -2  13    0.72    3.38   1 
  10   2  13    0.95    3.66   1 
  10  -2  14    1.25    3.74   1 
  10   2  14    3.34    3.97   1 
  10  -2  15    9.14    4.77   1 
  10   2  15    8.43    4.63   1 
  10  -2  16   -0.22    4.30   1 
  10   2  16   -0.08    4.51   1 
  10   3 -12   26.16    3.13   1 
  10  -3 -11   22.81    2.66   1 
  10   3 -11   26.28    3.24   1 
  10  -3 -10    0.19    1.79   1 
  10   3 -10    0.51    2.48   1 
  10  -3  -9   32.05    2.71   1 
  10   3  -9   32.85    3.12   1 
  10  -3  -8   19.66    2.30   1 
  10   3  -8   17.37    3.22   1 
  10  -3  -7   30.86    2.72   1 
  10   3  -7   32.79    3.19   1 
  10  -3  -6    7.46    2.23   1 
  10   3  -6    6.74    2.56   1 
  10  -3  -5  206.11    6.40   1 
  10   3  -5  206.50    7.04   1 
  10  -3  -4    0.79    1.57   1 
  10   3  -4    0.81    2.02   1 
  10  -3  -3   -0.10    1.64   1 
  10   3  -3   -0.05    1.86   1 
  10  -3  -2   25.03    3.44   1 
  10   3  -2   23.22    3.50   1 
  10  -3  -1   29.96    2.92   1 
  10   3  -1   30.23    3.15   1 
  10  -3   0   20.00    3.38   1 
  10   3   0   15.49    3.16   1 
  10  -3   1   49.22    3.69   1 
  10   3   1   51.76    3.93   1 
  10  -3   2   50.27    3.82   1 
  10   3   2   47.80    3.87   1 
  10  -3   3   66.42    4.40   1 
  10   3   3   61.13    4.43   1 
  10  -3   4    1.33    1.96   1 
  10   3   4    2.95    2.53   1 
  10  -3   5    1.87    2.13   1 
  10   3   5    1.91    2.28   1 
  10  -3   6    8.88    2.89   1 
  10   3   6   11.51    3.34   1 
  10  -3   7    1.88    2.22   1 
  10   3   7    0.93    2.54   1 
  10  -3   8    0.41    2.39   1 
  10   3   8    0.89    2.65   1 
  10  -3   9    4.33    2.71   1 
  10   3   9    1.69    2.79   1 
  10  -3  10    8.18    3.28   1 
  10   3  10   10.79    3.79   1 
  10  -3  11   14.43    4.00   1 
  10   3  11   13.99    4.36   1 
  10  -3  12   -0.62    3.10   1 
  10   3  12    0.34    3.68   1 
  10  -3  13   10.27    4.09   1 
  10   3  13   10.33    4.31   1 
  10  -3  14   -3.72    3.35   1 
  10   3  14    0.36    3.92   1 
  10  -3  15   -1.27    3.66   1 
  10   3  15   -0.91    4.14   1 
  10  -3  16    0.93    4.22   1 
  10   4 -12    8.96    3.24   1 
  10  -4 -11   27.21    2.70   1 
  10   4 -11   29.48    3.45   1 
  10  -4 -10   23.39    2.58   1 
  10   4 -10   28.63    4.33   1 
  10  -4  -9   24.23    2.48   1 
  10   4  -9   33.35    4.30   1 
  10  -4  -8    1.21    1.90   1 
  10   4  -8    0.58    2.44   1 
  10  -4  -7   74.29    3.96   1 
  10   4  -7   72.09    4.48   1 
  10  -4  -6  103.26    4.68   1 
  10   4  -6   95.98    5.14   1 
  10  -4  -5   40.29    2.96   1 
  10   4  -5   30.82    3.23   1 
  10  -4  -4   30.53    2.81   1 
  10   4  -4   30.20    3.16   1 
  10  -4  -3   23.87    3.33   1 
  10   4  -3   22.80    3.67   1 
  10  -4  -2   20.73    2.53   1 
  10   4  -2   26.29    3.74   1 
  10  -4  -1   25.42    2.71   1 
  10   4  -1   23.21    2.88   1 
  10  -4   0   14.20    2.93   1 
  10   4   0   13.24    3.30   1 
  10  -4   1   13.16    2.93   1 
  10   4   1   16.21    3.49   1 
  10  -4   2   17.33    3.17   1 
  10   4   2   23.42    4.01   1 
  10  -4   3    1.50    1.87   1 
  10   4   3    2.08    2.42   1 
  10  -4   4   93.46    5.34   1 
  10   4   4   88.90    5.47   1 
  10  -4   5   21.12    3.83   1 
  10   4   5   17.59    3.69   1 
  10  -4   6    3.88    2.56   1 
  10   4   6    5.49    2.81   1 
  10  -4   7   11.17    3.18   1 
  10   4   7    8.10    3.21   1 
  10  -4   8    9.63    3.23   1 
  10   4   8   10.92    3.67   1 
  10  -4   9    1.26    2.42   1 
  10   4   9    5.43    3.38   1 
  10  -4  10    3.32    2.83   1 
  10   4  10    2.53    3.31   1 
  10  -4  11    0.98    2.70   1 
  10   4  11   -1.85    3.13   1 
  10  -4  12   26.14    4.92   1 
  10   4  12   26.09    5.53   1 
  10  -4  13    0.85    3.35   1 
  10   4  13    1.34    3.61   1 
  10  -4  14    4.34    3.87   1 
  10   4  14    7.76    4.31   1 
  10  -4  15   -0.44    3.64   1 
  10   4  15    0.29    4.38   1 
  10  -4  16    3.73    4.50   1 
  10   5 -12   15.68    4.03   1 
  10  -5 -11    7.77    2.42   1 
  10   5 -11    8.95    3.42   1 
  10  -5 -10   14.00    2.77   1 
  10   5 -10   13.56    3.61   1 
  10  -5  -9    3.33    1.94   1 
  10   5  -9    2.56    2.85   1 
  10  -5  -8   44.77    3.28   1 
  10   5  -8   40.43    3.79   1 
  10  -5  -7    2.68    1.98   1 
  10   5  -7    0.85    2.49   1 
  10  -5  -6    9.07    2.33   1 
  10   5  -6    8.79    3.10   1 
  10  -5  -5    6.59    2.28   1 
  10   5  -5    1.76    2.44   1 
  10  -5  -4   35.97    3.07   1 
  10   5  -4   30.35    3.35   1 
  10  -5  -3   16.30    3.02   1 
  10   5  -3   10.29    2.91   1 
  10  -5  -2   51.98    3.64   1 
  10   5  -2   48.18    3.97   1 
  10  -5  -1    6.51    2.45   1 
  10   5  -1    4.27    2.63   1 
  10  -5   0    1.37    2.01   1 
  10   5   0    0.70    2.22   1 
  10  -5   1   32.67    3.25   1 
  10   5   1   28.57    3.34   1 
  10  -5   2   17.26    3.37   1 
  10   5   2   15.79    3.53   1 
  10  -5   3    1.60    2.14   1 
  10   5   3    0.99    2.27   1 
  10  -5   4   14.49    3.39   1 
  10   5   4   15.30    3.59   1 
  10  -5   5   31.16    4.49   1 
  10   5   5   27.25    4.40   1 
  10  -5   6   30.79    3.48   1 
  10   5   6   32.11    4.73   1 
  10  -5   7   10.64    3.13   1 
  10   5   7   12.37    3.71   1 
  10  -5   8    8.29    3.31   1 
  10   5   8    8.07    3.43   1 
  10  -5   9    2.70    2.76   1 
  10   5   9    1.92    3.12   1 
  10  -5  10   15.52    4.04   1 
  10   5  10   20.22    4.76   1 
  10  -5  11    0.91    3.08   1 
  10   5  11    3.83    3.47   1 
  10  -5  12   18.07    4.53   1 
  10   5  12   18.18    4.94   1 
  10  -5  13    4.32    3.59   1 
  10   5  13    4.01    4.13   1 
  10  -5  14    7.57    4.13   1 
  10   5  14   10.04    4.74   1 
  10  -5  15   -0.90    3.77   1 
  10   5  15    1.13    4.56   1 
  10  -5  16    4.92    4.41   1 
  10   6 -12    2.70    3.26   1 
  10  -6 -11   -0.49    2.16   1 
  10   6 -11   -0.91    3.14   1 
  10  -6 -10    0.72    2.06   1 
  10   6 -10   -0.68    2.80   1 
  10  -6  -9    7.87    2.44   1 
  10   6  -9    7.96    3.40   1 
  10  -6  -8    4.93    2.29   1 
  10   6  -8    5.12    3.35   1 
  10  -6  -7    5.91    2.40   1 
  10   6  -7    1.19    2.78   1 
  10  -6  -6   11.38    2.61   1 
  10   6  -6   14.77    3.62   1 
  10  -6  -5    5.64    2.21   1 
  10   6  -5    5.86    2.93   1 
  10  -6  -4   42.73    3.41   1 
  10   6  -4   39.01    3.86   1 
  10  -6  -3   11.74    2.82   1 
  10   6  -3    7.30    3.04   1 
  10  -6  -2   22.31    3.55   1 
  10   6  -2   16.85    3.69   1 
  10  -6  -1   12.30    2.93   1 
  10   6  -1    8.91    3.02   1 
  10  -6   0    1.51    2.07   1 
  10   6   0    1.13    2.28   1 
  10  -6   1    5.58    2.45   1 
  10   6   1    8.01    3.08   1 
  10  -6   2   -1.28    2.09   1 
  10   6   2    0.63    2.39   1 
  10  -6   3   17.49    3.73   1 
  10   6   3   20.76    4.02   1 
  10  -6   4   26.08    4.12   1 
  10   6   4   25.79    4.45   1 
  10  -6   5   16.92    3.76   1 
  10   6   5   18.67    4.07   1 
  10  -6   6   -0.74    2.27   1 
  10   6   6   -0.92    2.59   1 
  10  -6   7   11.43    3.47   1 
  10   6   7   12.93    3.79   1 
  10  -6   8    9.66    3.40   1 
  10   6   8   10.77    3.69   1 
  10  -6   9    9.71    3.39   1 
  10   6   9   11.39    3.93   1 
  10  -6  10    4.84    3.34   1 
  10   6  10    7.98    3.83   1 
  10  -6  11   11.34    3.96   1 
  10   6  11   16.42    4.65   1 
  10  -6  12    2.47    3.24   1 
  10   6  12    2.42    4.03   1 
  10  -6  13    6.13    3.83   1 
  10   6  13    4.02    4.43   1 
  10  -6  14    9.25    4.24   1 
  10   6  14    8.03    5.12   1 
  10  -6  15    3.97    3.99   1 
  10   6  15   15.57    5.46   1 
  10  -6  16    1.58    4.33   1 
  10   7 -12    0.44    3.45   1 
  10  -7 -11    8.81    2.75   1 
  10   7 -11    3.03    3.37   1 
  10  -7 -10    4.01    2.48   1 
  10   7 -10    4.38    3.55   1 
  10  -7  -9    0.94    2.25   1 
  10   7  -9    1.18    3.13   1 
  10  -7  -8    9.85    2.79   1 
  10   7  -8   11.44    3.74   1 
  10  -7  -7   20.42    3.40   1 
  10   7  -7   17.61    4.54   1 
  10  -7  -6    5.96    2.56   1 
  10   7  -6    4.29    3.37   1 
  10  -7  -5   24.46    3.60   1 
  10   7  -5   20.65    4.28   1 
  10  -7  -4    3.47    2.19   1 
  10   7  -4   -2.37    2.54   1 
  10  -7  -3    6.70    2.52   1 
  10   7  -3    5.79    3.07   1 
  10  -7  -2    4.10    2.25   1 
  10   7  -2    0.74    2.74   1 
  10  -7  -1   18.31    3.45   1 
  10   7  -1   10.33    3.31   1 
  10  -7   0   -0.04    2.07   1 
  10   7   0    1.20    2.63   1 
  10  -7   1   -1.58    2.07   1 
  10   7   1   -1.73    2.51   1 
  10  -7   2    2.82    2.37   1 
  10   7   2    2.31    2.74   1 
  10  -7   3   26.48    4.30   1 
  10   7   3   24.59    4.55   1 
  10  -7   4   -0.81    2.22   1 
  10   7   4   -1.81    2.63   1 
  10  -7   5   41.10    4.15   1 
  10   7   5   42.28    4.42   1 
  10  -7   6    0.07    2.56   1 
  10   7   6   -0.46    2.71   1 
  10  -7   7    6.25    3.18   1 
  10   7   7    8.20    3.46   1 
  10  -7   8   -0.74    2.67   1 
  10   7   8   -0.39    3.14   1 
  10  -7   9   -0.49    2.84   1 
  10   7   9   -0.34    3.37   1 
  10  -7  10    2.89    3.03   1 
  10   7  10    2.11    3.71   1 
  10  -7  11    4.29    3.28   1 
  10   7  11    7.30    4.30   1 
  10  -7  12    0.60    3.33   1 
  10   7  12    0.45    3.98   1 
  10  -7  13   13.78    4.45   1 
  10   7  13   14.81    5.23   1 
  10  -7  14   -1.51    3.54   1 
  10   7  14   -1.01    4.49   1 
  10  -7  15   -0.33    3.91   1 
  10   7  15   -4.09    4.82   1 
  10  -7  16    1.81    4.24   1 
  10   8 -13   27.43    5.56   1 
  10   8 -12    2.74    3.97   1 
  10   8 -11    9.96    4.29   1 
  10  -8 -10   14.41    3.18   1 
  10   8 -10   13.50    4.35   1 
  10  -8  -9   13.17    3.12   1 
  10   8  -9   12.48    4.03   1 
  10  -8  -8    3.84    2.50   1 
  10   8  -8    2.61    3.25   1 
  10  -8  -7    7.74    3.00   1 
  10   8  -7    6.36    3.53   1 
  10  -8  -6   47.32    3.89   1 
  10   8  -6   43.93    4.72   1 
  10  -8  -5    5.32    2.54   1 
  10   8  -5    2.60    3.30   1 
  10  -8  -4    0.98    2.31   1 
  10   8  -4   -1.23    2.67   1 
  10  -8  -3   -0.68    2.06   1 
  10   8  -3   -0.59    2.70   1 
  10  -8  -2    6.78    2.87   1 
  10   8  -2    5.64    3.18   1 
  10  -8  -1    5.16    2.78   1 
  10   8  -1    4.30    2.98   1 
  10  -8   0   -0.15    2.20   1 
  10   8   0    0.85    3.00   1 
  10  -8   1    4.67    2.75   1 
  10   8   1    4.49    3.20   1 
  10  -8   2    0.11    2.36   1 
  10   8   2    0.25    2.65   1 
  10  -8   3    3.03    2.67   1 
  10   8   3    3.06    3.05   1 
  10  -8   4   43.39    4.32   1 
  10   8   4   35.74    4.29   1 
  10  -8   5    2.43    2.74   1 
  10   8   5    0.95    3.23   1 
  10  -8   6    0.90    2.74   1 
  10   8   6    0.44    3.05   1 
  10  -8   7    1.71    2.87   1 
  10   8   7    1.22    3.27   1 
  10  -8   8    9.01    3.81   1 
  10   8   8   13.31    4.28   1 
  10  -8   9   -0.06    2.96   1 
  10   8   9   -1.14    3.40   1 
  10  -8  10   -0.71    3.26   1 
  10   8  10    0.95    3.78   1 
  10  -8  11    6.75    3.84   1 
  10   8  11    6.91    4.29   1 
  10  -8  12    6.09    3.87   1 
  10   8  12   10.45    4.97   1 
  10  -8  13   -1.80    3.67   1 
  10   8  13    0.50    4.69   1 
  10  -8  14   -0.04    4.06   1 
  10   8  14   -2.28    4.77   1 
  10  -8  15    4.35    4.36   1 
  10   8  15    0.40    5.24   1 
  10  -8  16    0.22    4.39   1 
  10   9 -13   -0.79    4.22   1 
  10   9 -12   27.50    5.47   1 
  10   9 -11    9.41    4.40   1 
  10  -9 -10    0.42    2.69   1 
  10   9 -10   -0.13    3.56   1 
  10  -9  -9    2.22    2.58   1 
  10   9  -9    2.56    3.88   1 
  10  -9  -8    2.64    2.57   1 
  10   9  -8    1.65    3.57   1 
  10  -9  -7    1.87    2.61   1 
  10   9  -7    3.49    3.79   1 
  10  -9  -6   -0.53    2.38   1 
  10   9  -6    1.75    3.45   1 
  10  -9  -5    1.16    2.35   1 
  10   9  -5    0.72    3.27   1 
  10  -9  -4   22.42    3.93   1 
  10   9  -4   22.47    4.91   1 
  10  -9  -3   30.32    3.50   1 
  10   9  -3   38.54    4.52   1 
  10  -9  -2   14.52    3.56   1 
  10   9  -2   17.22    4.59   1 
  10  -9  -1    1.09    2.37   1 
  10   9  -1    1.17    2.86   1 
  10  -9   0    4.09    2.55   1 
  10   9   0    1.99    2.82   1 
  10  -9   1    1.96    2.48   1 
  10   9   1    2.61    3.23   1 
  10  -9   2   14.33    3.85   1 
  10   9   2   13.34    4.15   1 
  10  -9   3    0.53    2.97   1 
  10   9   3    2.13    3.09   1 
  10  -9   4    8.79    3.36   1 
  10   9   4    5.79    3.47   1 
  10  -9   5    5.66    3.49   1 
  10   9   5    4.51    3.42   1 
  10  -9   6   28.35    5.06   1 
  10   9   6   27.18    5.23   1 
  10  -9   7    6.37    3.43   1 
  10   9   7    1.31    3.50   1 
  10  -9   8    2.65    3.38   1 
  10   9   8    0.40    3.52   1 
  10  -9   9   -1.83    3.08   1 
  10   9   9   -3.86    3.38   1 
  10  -9  10   22.64    5.19   1 
  10   9  10   25.79    5.73   1 
  10  -9  11   -0.54    3.38   1 
  10   9  11    0.78    4.24   1 
  10  -9  12    1.41    3.90   1 
  10   9  12   -0.64    4.64   1 
  10  -9  13    3.15    4.13   1 
  10   9  13    2.74    5.15   1 
  10  -9  14    1.37    4.01   1 
  10   9  14    0.39    5.16   1 
  10  -9  15   -0.78    4.53   1 
  10  10 -13    4.93    5.00   1 
  10  10 -12    9.74    4.84   1 
  10  10 -11    0.24    4.01   1 
  10 -10 -10   -0.02    2.74   1 
  10  10 -10   -0.13    3.97   1 
  10 -10  -9    3.06    2.88   1 
  10  10  -9    1.31    3.77   1 
  10 -10  -8   -2.76    2.62   1 
  10  10  -8    0.68    3.73   1 
  10 -10  -7    2.44    2.80   1 
  10  10  -7    2.91    3.92   1 
  10 -10  -6   41.71    4.03   1 
  10  10  -6   41.81    5.21   1 
  10 -10  -5   18.27    3.78   1 
  10  10  -5   11.66    4.13   1 
  10 -10  -4    5.70    2.92   1 
  10  10  -4    5.43    3.47   1 
  10 -10  -3    5.55    2.94   1 
  10  10  -3    8.74    3.90   1 
  10 -10  -2    2.29    2.70   1 
  10  10  -2    2.55    3.34   1 
  10 -10  -1   17.74    3.97   1 
  10  10  -1   18.84    4.94   1 
  10 -10   0   13.78    3.68   1 
  10  10   0   10.42    3.89   1 
  10 -10   1   15.72    4.06   1 
  10  10   1   18.08    4.51   1 
  10 -10   2   15.92    3.96   1 
  10  10   2   15.00    4.56   1 
  10 -10   3   17.03    4.23   1 
  10  10   3   13.70    4.27   1 
  10 -10   4   28.71    5.16   1 
  10  10   4   21.53    4.92   1 
  10 -10   5    9.95    4.01   1 
  10  10   5    6.55    4.05   1 
  10 -10   6    1.90    3.24   1 
  10  10   6    3.52    3.84   1 
  10 -10   7   21.40    4.88   1 
  10  10   7   14.37    4.54   1 
  10 -10   8    2.08    3.46   1 
  10  10   8    1.84    3.67   1 
  10 -10   9    6.12    4.22   1 
  10  10   9    3.75    4.20   1 
  10 -10  10    0.68    4.03   1 
  10  10  10    0.24    4.28   1 
  10 -10  11    4.61    4.24   1 
  10  10  11   -0.60    4.64   1 
  10 -10  12    1.37    4.33   1 
  10  10  12    2.64    4.88   1 
  10 -10  13    1.19    4.33   1 
  10  10  13   -1.96    4.68   1 
  10 -10  14    1.08    4.49   1 
  10  10  14    4.24    5.77   1 
  10  11 -13    6.44    5.36   1 
  10  11 -12    3.62    4.90   1 
  10  11 -11    3.89    4.59   1 
  10 -11 -10    2.51    3.20   1 
  10  11 -10    2.22    4.75   1 
  10 -11  -9    0.51    3.12   1 
  10  11  -9   -0.42    4.11   1 
  10 -11  -8    1.55    2.93   1 
  10  11  -8    0.20    3.90   1 
  10 -11  -7    0.21    2.92   1 
  10  11  -7    0.13    3.89   1 
  10 -11  -6    0.69    2.76   1 
  10  11  -6    1.29    3.60   1 
  10 -11  -5    6.71    3.27   1 
  10  11  -5    5.94    4.20   1 
  10 -11  -4    0.53    2.79   1 
  10  11  -4   -1.91    3.82   1 
  10 -11  -3   -0.26    2.73   1 
  10  11  -3   -1.46    3.06   1 
  10 -11  -2    9.33    3.36   1 
  10  11  -2    5.32    3.80   1 
  10 -11  -1    3.01    2.97   1 
  10  11  -1   -0.62    3.18   1 
  10 -11   0   12.91    3.81   1 
  10  11   0    8.58    4.08   1 
  10 -11   1   -0.92    2.91   1 
  10  11   1    0.12    3.57   1 
  10 -11   2    2.33    3.05   1 
  10  11   2   -2.09    3.38   1 
  10 -11   3   31.96    5.42   1 
  10  11   3   20.26    5.29   1 
  10 -11   4   -1.09    2.70   1 
  10  11   4   -0.05    3.67   1 
  10 -11   5   10.25    4.27   1 
  10  11   5   17.46    5.29   1 
  10 -11   6    1.27    3.44   1 
  10  11   6    2.55    3.96   1 
  10 -11   7    3.34    3.56   1 
  10  11   7    7.64    4.46   1 
  10 -11   8    1.13    3.60   1 
  10  11   8    3.63    4.18   1 
  10 -11   9    0.98    3.82   1 
  10  11   9   -0.43    4.48   1 
  10 -11  10   -1.19    4.10   1 
  10  11  10    3.34    4.55   1 
  10 -11  11   14.96    5.54   1 
  10  11  11   15.21    5.97   1 
  10 -11  12   -0.65    4.32   1 
  10  11  12   -1.18    5.52   1 
  10 -11  13    8.13    5.24   1 
  10  11  13    5.92    6.17   1 
  10  12 -13   17.81    6.54   1 
  10  12 -12   -0.78    5.11   1 
  10  12 -11    2.77    4.98   1 
  10 -12 -10    0.30    3.28   1 
  10  12 -10   -0.40    4.39   1 
  10 -12  -9    5.88    3.39   1 
  10  12  -9    6.01    4.94   1 
  10 -12  -8    1.12    3.33   1 
  10  12  -8    2.18    4.29   1 
  10 -12  -7    0.89    3.16   1 
  10  12  -7    7.68    4.82   1 
  10 -12  -6    0.66    3.23   1 
  10  12  -6    0.14    4.10   1 
  10 -12  -5   -1.29    3.06   1 
  10  12  -5   -4.19    3.64   1 
  10 -12  -4    4.13    3.28   1 
  10  12  -4    2.43    3.96   1 
  10 -12  -3    8.54    3.53   1 
  10  12  -3    6.74    4.11   1 
  10 -12  -2    0.07    2.85   1 
  10  12  -2    1.42    4.13   1 
  10 -12  -1   -0.57    3.00   1 
  10  12  -1   -0.08    3.41   1 
  10 -12   0    4.45    3.20   1 
  10  12   0    1.84    3.69   1 
  10 -12   1   19.47    4.56   1 
  10  12   1   17.83    4.96   1 
  10 -12   2   -0.42    3.21   1 
  10  12   2   -0.07    3.69   1 
  10 -12   3   15.33    4.47   1 
  10  12   3   11.85    4.85   1 
  10 -12   4    2.72    3.45   1 
  10  12   4    3.70    4.05   1 
  10 -12   5    0.97    3.67   1 
  10  12   5    4.31    4.28   1 
  10 -12   6    0.53    3.65   1 
  10  12   6    2.52    3.80   1 
  10 -12   7   13.84    5.03   1 
  10  12   7    5.49    4.51   1 
  10 -12   8   -0.65    3.72   1 
  10  12   8    0.66    4.21   1 
  10 -12   9    7.18    4.84   1 
  10  12   9    4.86    4.81   1 
  10 -12  10   -2.11    4.15   1 
  10  12  10    0.26    4.66   1 
  10 -12  11   10.45    5.32   1 
  10  12  11    7.18    5.50   1 
  10 -12  12    4.40    5.06   1 
  10  12  12    0.89    5.33   1 
  10  13 -13   -4.48    5.72   1 
  10  13 -12   15.33    6.45   1 
  10  13 -11    1.94    5.24   1 
  10 -13 -10    7.57    4.13   1 
  10  13 -10    1.65    4.96   1 
  10 -13  -9    0.03    3.50   1 
  10  13  -9   -1.07    4.35   1 
  10 -13  -8    6.62    4.01   1 
  10  13  -8    6.48    5.20   1 
  10 -13  -7    5.91    3.93   1 
  10  13  -7    2.95    4.16   1 
  10 -13  -6   -1.08    3.23   1 
  10  13  -6   -1.94    4.35   1 
  10 -13  -5    2.67    3.41   1 
  10  13  -5   -1.10    3.98   1 
  10 -13  -4   19.65    4.64   1 
  10  13  -4   17.76    5.58   1 
  10 -13  -3    2.47    3.51   1 
  10  13  -3    2.23    4.36   1 
  10 -13  -2    0.14    3.04   1 
  10  13  -2   -0.62    3.68   1 
  10 -13  -1    0.62    3.17   1 
  10  13  -1    2.35    3.87   1 
  10 -13   0    0.21    3.32   1 
  10  13   0    3.80    4.03   1 
  10 -13   1    3.83    3.40   1 
  10  13   1    3.42    4.39   1 
  10 -13   2    0.37    3.40   1 
  10  13   2   -0.52    4.08   1 
  10 -13   3   -3.13    3.01   1 
  10  13   3   -1.61    3.88   1 
  10 -13   4   -1.60    3.40   1 
  10  13   4   -0.52    3.72   1 
  10 -13   5    2.27    3.90   1 
  10  13   5    3.41    4.45   1 
  10 -13   6    2.30    3.85   1 
  10  13   6    3.21    4.49   1 
  10 -13   7    1.88    4.36   1 
  10  13   7    2.28    4.61   1 
  10 -13   8    0.88    4.63   1 
  10  13   8   -0.27    4.70   1 
  10 -13   9    7.81    4.96   1 
  10  13   9    7.42    5.44   1 
  10 -13  10    1.92    4.95   1 
  10  13  10   -1.60    5.06   1 
  10 -13  11    2.76    5.46   1 
  10  13  11    2.10    5.26   1 
  10  14 -13    1.36    6.16   1 
  10  14 -12   -1.14    6.05   1 
  10  14 -11    4.97    6.41   1 
  10 -14 -10    8.35    4.62   1 
  10  14 -10   12.84    6.07   1 
  10 -14  -9    0.86    4.06   1 
  10  14  -9   -0.31    5.25   1 
  10 -14  -8    1.37    3.83   1 
  10  14  -8   -1.31    4.85   1 
  10 -14  -7    1.10    3.76   1 
  10  14  -7    1.81    4.74   1 
  10 -14  -6   19.20    5.03   1 
  10  14  -6   18.25    5.84   1 
  10 -14  -5   -1.69    3.59   1 
  10  14  -5   -2.78    4.65   1 
  10 -14  -4    7.46    4.01   1 
  10  14  -4    1.45    4.51   1 
  10 -14  -3    0.91    3.49   1 
  10  14  -3    1.20    4.12   1 
  10 -14  -2    3.66    3.52   1 
  10  14  -2    1.23    4.41   1 
  10 -14  -1    2.52    3.59   1 
  10  14  -1   -2.06    4.20   1 
  10 -14   0   -0.08    3.61   1 
  10  14   0    0.17    4.29   1 
  10 -14   1    1.20    3.42   1 
  10  14   1    6.48    4.89   1 
  10 -14   2    1.66    3.66   1 
  10  14   2    0.35    4.31   1 
  10 -14   3    2.61    3.94   1 
  10  14   3   -1.95    4.26   1 
  10 -14   4   14.74    5.09   1 
  10  14   4   11.52    5.52   1 
  10 -14   5   -1.91    3.96   1 
  10  14   5    0.21    4.29   1 
  10 -14   6   -0.33    4.03   1 
  10  14   6   -1.90    4.92   1 
  10 -14   7    3.34    4.67   1 
  10  14   7   -2.41    5.41   1 
  10 -14   8   -2.96    4.41   1 
  10  14   8   -3.47    5.04   1 
  10 -14   9    2.34    4.79   1 
  10  14   9    0.62    5.55   1 
  10  15 -11    1.29    6.39   1 
  10  15 -10    0.35    6.11   1 
  10 -15  -9   10.11    5.22   1 
  10  15  -9    2.58    5.90   1 
  10 -15  -8    2.47    4.30   1 
  10  15  -8    3.07    5.68   1 
  10 -15  -7    5.74    4.60   1 
  10  15  -7   -1.23    5.02   1 
  10 -15  -6    0.27    4.14   1 
  10  15  -6    3.98    5.09   1 
  10 -15  -5   12.64    5.07   1 
  10  15  -5   14.49    6.14   1 
  10 -15  -4    4.06    4.12   1 
  10  15  -4    5.08    5.00   1 
  10 -15  -3    1.96    3.78   1 
  10  15  -3   -0.30    4.64   1 
  10 -15  -2    1.21    3.89   1 
  10  15  -2   -2.34    4.68   1 
  10 -15  -1    8.37    4.40   1 
  10  15  -1    5.91    4.85   1 
  10 -15   0    3.50    4.24   1 
  10  15   0   -1.58    4.46   1 
  10 -15   1   -2.01    3.48   1 
  10  15   1   -1.60    4.50   1 
  10 -15   2    2.31    4.01   1 
  10  15   2    0.78    4.64   1 
  10 -15   3   11.05    4.82   1 
  10  15   3    8.01    5.47   1 
  10 -15   4   -1.06    3.92   1 
  10  15   4    0.26    4.47   1 
  10 -15   5    1.66    4.42   1 
  10  15   5    0.91    4.93   1 
  10 -15   6    6.02    5.20   1 
  10  15   6   -0.41    4.89   1 
  10 -15   7   -0.16    4.76   1 
  10  15   7   -1.51    5.00   1 
  10 -15   8   -0.93    4.77   1 
  10  15   8   -1.49    5.06   1 
  10 -16  -9   -3.72    4.69   1 
  10  16  -9   -1.75    6.36   1 
  10 -16  -8   -0.44    4.80   1 
  10  16  -8   -3.36    5.78   1 
  10 -16  -7    8.03    5.14   1 
  10  16  -7    2.60    6.08   1 
  10 -16  -6    0.78    4.51   1 
  10  16  -6   -0.83    5.45   1 
  10 -16  -5   -1.09    4.37   1 
  10  16  -5   -3.17    4.85   1 
  10 -16  -4   -1.42    3.97   1 
  10  16  -4    0.43    5.37   1 
  10 -16  -3   16.09    5.44   1 
  10  16  -3   15.22    6.62   1 
  10 -16  -2   -0.26    4.09   1 
  10  16  -2    0.86    5.00   1 
  10 -16  -1    0.84    4.13   1 
  10  16  -1    3.83    5.21   1 
  10 -16   0    2.63    4.37   1 
  10  16   0    0.60    4.79   1 
  10 -16   1   10.08    4.98   1 
  10  16   1    8.23    5.71   1 
  10 -16   2   -1.42    3.85   1 
  10  16   2   -5.49    4.71   1 
  10 -16   3    5.93    4.69   1 
  10  16   3    5.25    5.39   1 
  10 -16   4    4.06    4.72   1 
  10  16   4    2.92    5.44   1 
  10 -16   5    5.68    5.24   1 
  10  16   5    7.27    5.51   1 
  10 -17  -4    8.05    5.25   1 
  10  17  -4    6.53    6.27   1 
  10 -17  -3   -2.58    4.24   1 
  10  17  -3   -2.90    4.96   1 
  10 -17  -2    2.75    4.87   1 
  10  17  -2    3.94    5.48   1 
  10 -17  -1    3.17    4.80   1 
  10  17  -1    3.94    5.86   1 
  10 -17   0   -1.79    4.25   1 
  10  17   0   -0.65    5.32   1 
  11   0 -11   -0.19    2.18   1 
  11   0 -10   -0.25    2.18   1 
  11   0  -9   -1.51    1.86   1 
  11   0  -8   20.30    3.11   1 
  11   0  -7   -0.82    1.78   1 
  11   0  -6   15.82    2.96   1 
  11   0  -5   -0.09    1.62   1 
  11   0  -4   52.37    3.63   1 
  11   0  -3   -0.90    1.81   1 
  11   0  -2   -0.03    1.73   1 
  11   0  -1    0.39    1.92   1 
  11   0   0   22.45    2.74   1 
  11   0   1    0.63    1.80   1 
  11   0   2   13.71    3.07   1 
  11   0   3    1.57    2.06   1 
  11   0   4   -0.10    2.00   1 
  11   0   5    2.41    2.40   1 
  11   0   6   33.80    3.72   1 
  11   0   7   -0.22    2.58   1 
  11   0   8   50.47    4.67   1 
  11   0   9    6.25    3.38   1 
  11   0  10   62.17    5.44   1 
  11   0  11    0.42    3.18   1 
  11   0  12    1.51    3.31   1 
  11   0  13    0.29    3.89   1 
  11   0  14    0.13    3.91   1 
  11   0  15   -2.75    4.23   1 
  11   0  16    7.26    5.28   1 
  11  -1 -11   10.26    2.77   1 
  11   1 -11   12.10    2.91   1 
  11  -1 -10   14.09    2.72   1 
  11   1 -10   16.84    3.15   1 
  11  -1  -9    6.98    2.57   1 
  11   1  -9   10.73    2.68   1 
  11  -1  -8    1.89    2.05   1 
  11   1  -8    1.50    2.08   1 
  11  -1  -7    2.23    2.01   1 
  11   1  -7    1.88    2.03   1 
  11  -1  -6  104.08    4.93   1 
  11   1  -6  101.76    4.95   1 
  11  -1  -5   12.17    2.66   1 
  11   1  -5   11.53    2.78   1 
  11  -1  -4   12.33    2.61   1 
  11   1  -4   12.36    2.80   1 
  11  -1  -3   45.33    3.35   1 
  11   1  -3   44.07    3.39   1 
  11  -1  -2   20.91    2.58   1 
  11   1  -2   23.77    3.50   1 
  11  -1  -1    2.06    1.82   1 
  11   1  -1    1.32    1.95   1 
  11  -1   0    0.15    1.66   1 
  11   1   0    0.69    1.79   1 
  11  -1   1   33.10    3.20   1 
  11   1   1   28.26    3.13   1 
  11  -1   2    4.68    2.33   1 
  11   1   2    4.38    2.39   1 
  11  -1   3    3.42    2.24   1 
  11   1   3    4.01    2.59   1 
  11  -1   4   31.26    3.31   1 
  11   1   4   31.39    3.56   1 
  11  -1   5   -0.90    1.99   1 
  11   1   5   -1.09    2.12   1 
  11  -1   6    4.87    2.81   1 
  11   1   6    4.77    2.73   1 
  11  -1   7    3.44    2.63   1 
  11   1   7    3.23    2.75   1 
  11  -1   8    5.54    2.81   1 
  11   1   8    1.88    2.94   1 
  11  -1   9    8.24    3.31   1 
  11   1   9    9.21    3.92   1 
  11  -1  10   -1.58    2.82   1 
  11   1  10   -0.44    2.88   1 
  11  -1  11    6.34    3.49   1 
  11   1  11    5.88    3.59   1 
  11  -1  12    7.03    4.14   1 
  11   1  12    8.24    4.14   1 
  11  -1  13   -0.22    3.75   1 
  11   1  13    0.12    4.04   1 
  11  -1  14   11.54    4.73   1 
  11   1  14    8.89    4.88   1 
  11  -1  15    0.57    4.14   1 
  11   1  15    5.25    4.45   1 
  11  -1  16    0.75    4.47   1 
  11   1  16    0.57    4.84   1 
  11  -2 -11   48.91    3.38   1 
  11   2 -11   51.13    3.83   1 
  11  -2 -10    0.14    1.96   1 
  11   2 -10    0.79    2.33   1 
  11  -2  -9   52.40    3.58   1 
  11   2  -9   48.85    3.65   1 
  11  -2  -8    4.88    2.23   1 
  11   2  -8    7.88    2.60   1 
  11  -2  -7   82.93    4.19   1 
  11   2  -7   85.70    4.59   1 
  11  -2  -6    0.69    1.77   1 
  11   2  -6    0.81    2.00   1 
  11  -2  -5  127.65    5.32   1 
  11   2  -5  126.29    5.68   1 
  11  -2  -4    4.49    2.03   1 
  11   2  -4    5.83    2.31   1 
  11  -2  -3    6.34    2.25   1 
  11   2  -3   10.44    2.76   1 
  11  -2  -2   16.40    3.07   1 
  11   2  -2   10.20    2.69   1 
  11  -2  -1   31.46    3.06   1 
  11   2  -1   30.09    3.14   1 
  11  -2   0    3.81    2.14   1 
  11   2   0    2.19    2.08   1 
  11  -2   1    9.89    2.88   1 
  11   2   1    8.51    2.83   1 
  11  -2   2    0.42    2.03   1 
  11   2   2    1.18    2.17   1 
  11  -2   3   41.41    3.75   1 
  11   2   3   40.07    3.81   1 
  11  -2   4    1.08    2.11   1 
  11   2   4   -0.99    2.23   1 
  11  -2   5    6.82    2.75   1 
  11   2   5    8.48    3.16   1 
  11  -2   6   -0.18    2.15   1 
  11   2   6    2.50    2.63   1 
  11  -2   7    1.01    2.41   1 
  11   2   7    1.48    2.89   1 
  11  -2   8    0.05    2.48   1 
  11   2   8    0.97    2.85   1 
  11  -2   9    1.27    2.63   1 
  11   2   9    0.19    2.91   1 
  11  -2  10    1.61    3.06   1 
  11   2  10    3.11    3.55   1 
  11  -2  11    7.46    3.60   1 
  11   2  11    4.10    3.48   1 
  11  -2  12    0.70    3.34   1 
  11   2  12    6.21    3.74   1 
  11  -2  13   16.89    4.79   1 
  11   2  13   19.62    5.41   1 
  11  -2  14    6.53    4.37   1 
  11   2  14    2.10    4.30   1 
  11  -2  15   -3.62    4.10   1 
  11   2  15    1.86    4.75   1 
  11  -2  16    1.03    4.53   1 
  11   2  16   -1.48    4.71   1 
  11   3 -12    0.07    3.09   1 
  11  -3 -11   59.98    3.79   1 
  11   3 -11   56.84    4.14   1 
  11  -3 -10    3.92    2.31   1 
  11   3 -10    2.74    2.91   1 
  11  -3  -9   27.31    2.74   1 
  11   3  -9   26.73    3.09   1 
  11  -3  -8    3.19    2.13   1 
  11   3  -8    1.06    2.25   1 
  11  -3  -7   61.73    3.78   1 
  11   3  -7   63.88    4.27   1 
  11  -3  -6   36.57    3.11   1 
  11   3  -6   36.40    3.44   1 
  11  -3  -5   48.03    3.45   1 
  11   3  -5   44.64    3.62   1 
  11  -3  -4   27.69    3.69   1 
  11   3  -4   28.38    4.15   1 
  11  -3  -3  152.55    6.01   1 
  11   3  -3  139.43    6.24   1 
  11  -3  -2    9.18    2.55   1 
  11   3  -2    7.94    2.76   1 
  11  -3  -1   15.71    3.04   1 
  11   3  -1   14.69    3.42   1 
  11  -3   0    1.02    1.90   1 
  11   3   0    0.10    1.99   1 
  11  -3   1   19.97    3.57   1 
  11   3   1   15.83    3.39   1 
  11  -3   2   26.56    3.07   1 
  11   3   2   28.23    4.23   1 
  11  -3   3    0.31    1.95   1 
  11   3   3   -1.17    2.05   1 
  11  -3   4    8.12    2.95   1 
  11   3   4   10.47    3.24   1 
  11  -3   5   29.35    3.50   1 
  11   3   5   36.95    5.21   1 
  11  -3   6   -1.62    1.93   1 
  11   3   6    0.43    2.66   1 
  11  -3   7    1.55    2.31   1 
  11   3   7   -1.37    2.64   1 
  11  -3   8   14.60    3.73   1 
  11   3   8   14.90    4.04   1 
  11  -3   9   18.10    4.19   1 
  11   3   9   13.40    4.03   1 
  11  -3  10   -1.93    2.55   1 
  11   3  10   -1.21    3.12   1 
  11  -3  11    2.98    3.20   1 
  11   3  11    4.61    3.63   1 
  11  -3  12    3.77    3.43   1 
  11   3  12    2.85    3.72   1 
  11  -3  13    1.28    3.66   1 
  11   3  13   -4.68    3.87   1 
  11  -3  14   -1.40    3.42   1 
  11   3  14   -0.42    4.12   1 
  11  -3  15   -0.36    4.11   1 
  11   3  15    3.82    4.78   1 
  11  -3  16   -2.36    4.51   1 
  11   3  16    2.29    5.20   1 
  11   4 -12   33.84    3.62   1 
  11  -4 -11    1.99    2.12   1 
  11   4 -11    2.05    3.18   1 
  11  -4 -10    5.83    2.48   1 
  11   4 -10    4.65    2.91   1 
  11  -4  -9   10.15    2.56   1 
  11   4  -9    8.04    3.26   1 
  11  -4  -8   57.36    3.71   1 
  11   4  -8   57.12    4.31   1 
  11  -4  -7   59.67    3.74   1 
  11   4  -7   53.06    4.12   1 
  11  -4  -6    7.47    2.47   1 
  11   4  -6    5.77    2.68   1 
  11  -4  -5   24.74    2.81   1 
  11   4  -5   31.66    4.36   1 
  11  -4  -4  100.27    4.98   1 
  11   4  -4   92.49    5.27   1 
  11  -4  -3    5.17    2.27   1 
  11   4  -3    4.05    2.57   1 
  11  -4  -2   21.27    3.56   1 
  11   4  -2   21.48    3.65   1 
  11  -4  -1    0.54    1.76   1 
  11   4  -1    0.87    2.30   1 
  11  -4   0    0.10    1.85   1 
  11   4   0    0.55    2.28   1 
  11  -4   1   -0.68    1.85   1 
  11   4   1   -1.98    2.17   1 
  11  -4   2    0.27    2.11   1 
  11   4   2   -0.87    2.14   1 
  11  -4   3    6.73    2.79   1 
  11   4   3   10.10    3.33   1 
  11  -4   4    3.67    2.46   1 
  11   4   4    6.39    3.03   1 
  11  -4   5    3.18    2.52   1 
  11   4   5    2.22    2.72   1 
  11  -4   6   14.79    3.57   1 
  11   4   6   15.41    3.87   1 
  11  -4   7   -0.53    2.47   1 
  11   4   7    1.39    2.93   1 
  11  -4   8   -1.62    2.59   1 
  11   4   8   -2.06    2.80   1 
  11  -4   9    1.22    2.65   1 
  11   4   9    0.93    3.02   1 
  11  -4  10    4.85    3.24   1 
  11   4  10    7.91    3.92   1 
  11  -4  11    3.83    3.35   1 
  11   4  11    1.74    3.69   1 
  11  -4  12    2.00    3.24   1 
  11   4  12    2.86    4.05   1 
  11  -4  13    6.06    4.10   1 
  11   4  13    3.61    4.17   1 
  11  -4  14    8.06    4.22   1 
  11   4  14   11.18    4.69   1 
  11  -4  15   -0.62    3.90   1 
  11   4  15    0.50    4.63   1 
  11  -4  16   -1.05    3.97   1 
  11   5 -12    0.14    3.26   1 
  11  -5 -11    6.29    2.55   1 
  11   5 -11    5.98    3.43   1 
  11  -5 -10   26.90    3.54   1 
  11   5 -10   28.72    4.90   1 
  11  -5  -9   -0.61    2.08   1 
  11   5  -9   -2.40    2.58   1 
  11  -5  -8    2.15    2.13   1 
  11   5  -8   -0.06    2.76   1 
  11  -5  -7    0.22    1.89   1 
  11   5  -7   -0.50    2.67   1 
  11  -5  -6   33.81    3.03   1 
  11   5  -6   31.36    3.55   1 
  11   5  -5    7.48    3.10   1 
  11  -5  -4   25.65    2.86   1 
  11   5  -4   28.55    4.30   1 
  11  -5  -3    2.13    1.94   1 
  11   5  -3    0.61    2.53   1 
  11  -5  -2   14.42    3.14   1 
  11   5  -2    9.30    3.08   1 
  11  -5  -1    8.96    2.82   1 
  11   5  -1    4.91    2.79   1 
  11  -5   0    0.18    1.90   1 
  11   5   0    0.42    2.22   1 
  11  -5   1    0.62    1.94   1 
  11   5   1   -0.02    2.41   1 
  11  -5   2   -0.55    1.96   1 
  11   5   2    2.32    2.50   1 
  11  -5   3   14.73    3.41   1 
  11   5   3   15.26    3.64   1 
  11  -5   4   38.50    3.75   1 
  11   5   4   41.45    4.17   1 
  11  -5   5    4.60    2.71   1 
  11   5   5    2.76    2.59   1 
  11  -5   6    4.17    2.74   1 
  11   5   6    2.63    2.80   1 
  11  -5   7   -0.09    2.30   1 
  11   5   7    0.79    2.73   1 
  11  -5   8   15.10    3.94   1 
  11   5   8   14.13    3.92   1 
  11  -5   9    1.99    2.91   1 
  11   5   9    4.26    3.35   1 
  11  -5  10    1.01    2.81   1 
  11   5  10    1.39    3.39   1 
  11  -5  11    3.16    3.25   1 
  11   5  11    4.84    3.87   1 
  11  -5  12   21.04    4.82   1 
  11   5  12   20.29    5.37   1 
  11  -5  13   -2.16    3.41   1 
  11   5  13    4.10    4.39   1 
  11  -5  14    7.08    4.41   1 
  11   5  14   10.84    5.26   1 
  11  -5  15    0.89    4.12   1 
  11   5  15    1.77    4.83   1 
  11  -5  16   -0.61    4.27   1 
  11   6 -12    1.15    3.35   1 
  11   6 -11    7.73    3.50   1 
  11  -6 -10    1.04    2.21   1 
  11   6 -10    0.40    3.10   1 
  11  -6  -9    3.57    2.36   1 
  11   6  -9    4.38    3.50   1 
  11  -6  -8    0.38    2.20   1 
  11   6  -8   -2.20    2.83   1 
  11  -6  -7    1.62    2.14   1 
  11   6  -7    0.46    2.95   1 
  11  -6  -6    0.37    2.15   1 
  11   6  -6   -0.72    2.72   1 
  11  -6  -5    7.16    2.56   1 
  11   6  -5    4.48    2.83   1 
  11  -6  -4   16.11    3.18   1 
  11   6  -4   13.06    3.56   1 
  11  -6  -3   12.00    2.92   1 
  11   6  -3    9.54    3.20   1 
  11  -6  -2    3.02    2.09   1 
  11   6  -2    3.09    2.64   1 
  11  -6  -1   14.86    3.17   1 
  11   6  -1   13.66    3.53   1 
  11  -6   0    1.38    2.11   1 
  11   6   0   -0.66    2.42   1 
  11  -6   1   -0.49    2.12   1 
  11   6   1    0.32    2.50   1 
  11  -6   2   11.71    3.32   1 
  11   6   2   15.73    3.74   1 
  11  -6   3   17.77    3.69   1 
  11   6   3   19.73    4.39   1 
  11  -6   4    2.73    2.51   1 
  11   6   4    5.03    3.27   1 
  11  -6   5   16.85    3.88   1 
  11   6   5   17.69    4.22   1 
  11  -6   6    8.19    3.20   1 
  11   6   6    3.29    3.15   1 
  11  -6   7    2.95    2.74   1 
  11   6   7    4.38    3.40   1 
  11  -6   8    5.12    3.02   1 
  11   6   8    4.78    3.46   1 
  11  -6   9   -0.41    2.85   1 
  11   6   9    3.69    3.64   1 
  11  -6  10    4.08    3.34   1 
  11   6  10    4.96    3.99   1 
  11  -6  11    7.81    3.84   1 
  11   6  11    5.03    3.93   1 
  11  -6  12    6.73    3.84   1 
  11   6  12    9.30    4.94   1 
  11  -6  13   27.26    5.62   1 
  11   6  13   28.59    6.31   1 
  11  -6  14    2.39    4.05   1 
  11   6  14    3.81    5.17   1 
  11  -6  15   -0.07    4.20   1 
  11   6  15   -3.79    4.86   1 
  11  -6  16    3.65    4.58   1 
  11   7 -12   -1.23    3.50   1 
  11   7 -11    1.06    3.41   1 
  11  -7 -10    0.74    2.30   1 
  11   7 -10   -1.17    3.15   1 
  11  -7  -9   23.50    3.77   1 
  11   7  -9   24.43    4.77   1 
  11  -7  -8    2.31    2.49   1 
  11   7  -8   -2.79    3.12   1 
  11  -7  -7   17.12    3.49   1 
  11   7  -7   21.22    4.49   1 
  11  -7  -6   13.96    3.15   1 
  11   7  -6    9.38    3.66   1 
  11  -7  -5   24.64    3.83   1 
  11   7  -5   14.59    4.11   1 
  11  -7  -4    5.72    2.53   1 
  11   7  -4    3.87    3.21   1 
  11  -7  -3   26.44    3.89   1 
  11   7  -3   24.70    4.57   1 
  11  -7  -2    0.42    2.22   1 
  11   7  -2    2.18    2.87   1 
  11  -7  -1    0.17    2.14   1 
  11   7  -1    1.49    2.78   1 
  11  -7   0   11.68    3.05   1 
  11   7   0   10.98    3.63   1 
  11  -7   1   45.47    4.09   1 
  11   7   1   39.61    4.29   1 
  11  -7   2    0.23    2.32   1 
  11   7   2   -0.85    2.49   1 
  11  -7   3   33.71    4.96   1 
  11   7   3   33.61    5.28   1 
  11  -7   4    2.83    2.76   1 
  11   7   4    2.82    3.02   1 
  11  -7   5   27.79    4.73   1 
  11   7   5   26.46    5.07   1 
  11  -7   6    1.80    2.77   1 
  11   7   6    2.98    3.46   1 
  11  -7   7    1.04    2.81   1 
  11   7   7    0.82    3.18   1 
  11  -7   8    1.67    3.04   1 
  11   7   8    2.59    3.49   1 
  11  -7   9    5.00    3.60   1 
  11   7   9    6.47    4.09   1 
  11  -7  10    2.13    3.09   1 
  11   7  10    5.04    4.12   1 
  11  -7  11    8.30    3.96   1 
  11   7  11    9.19    4.51   1 
  11  -7  12   -0.60    3.44   1 
  11   7  12   -0.90    4.28   1 
  11  -7  13   -1.03    3.45   1 
  11   7  13   -2.65    4.49   1 
  11  -7  14    3.27    4.18   1 
  11   7  14    3.87    4.95   1 
  11  -7  15    5.32    4.39   1 
  11   7  15    9.46    5.70   1 
  11  -7  16    0.48    4.71   1 
  11   8 -12   11.22    4.45   1 
  11   8 -11    6.40    4.11   1 
  11  -8 -10   -0.38    2.45   1 
  11   8 -10   -0.33    3.58   1 
  11  -8  -9    1.44    2.61   1 
  11   8  -9    0.58    3.24   1 
  11  -8  -8   19.64    3.77   1 
  11   8  -8   16.15    4.29   1 
  11  -8  -7   16.48    3.57   1 
  11   8  -7   15.32    4.47   1 
  11  -8  -6    1.76    2.53   1 
  11   8  -6    1.00    3.21   1 
  11  -8  -5   17.41    3.49   1 
  11   8  -5   13.74    4.02   1 
  11  -8  -4   27.29    3.29   1 
  11   8  -4   28.98    5.26   1 
  11  -8  -3    4.50    2.55   1 
  11   8  -3   -1.36    3.01   1 
  11  -8  -2    8.88    3.13   1 
  11   8  -2    5.60    3.37   1 
  11  -8  -1    3.08    2.62   1 
  11   8  -1    2.53    3.15   1 
  11  -8   0    1.17    2.39   1 
  11   8   0    0.54    3.02   1 
  11  -8   1    0.33    2.40   1 
  11   8   1   -1.61    2.71   1 
  11  -8   2    6.35    3.02   1 
  11   8   2    7.08    3.50   1 
  11  -8   3   34.78    4.02   1 
  11   8   3   35.38    4.31   1 
  11  -8   4    2.42    2.84   1 
  11   8   4    4.41    3.53   1 
  11  -8   5    2.40    3.18   1 
  11   8   5    3.40    3.49   1 
  11  -8   6    2.93    3.09   1 
  11   8   6    3.72    3.54   1 
  11  -8   7    4.67    3.15   1 
  11   8   7    4.50    3.71   1 
  11  -8   8   11.34    3.98   1 
  11   8   8    7.95    4.16   1 
  11  -8   9    0.41    3.36   1 
  11   8   9    1.30    4.13   1 
  11  -8  10    5.73    3.81   1 
  11   8  10    6.43    4.29   1 
  11  -8  11    2.21    3.73   1 
  11   8  11    5.61    4.53   1 
  11  -8  12    0.38    3.76   1 
  11   8  12   -1.78    4.55   1 
  11  -8  13    1.79    4.21   1 
  11   8  13    0.69    4.69   1 
  11  -8  14    0.87    4.14   1 
  11   8  14    0.15    5.16   1 
  11  -8  15   -1.07    4.30   1 
  11   8  15   -2.31    5.70   1 
  11   9 -13    6.99    4.31   1 
  11   9 -12    1.71    4.23   1 
  11   9 -11    1.75    4.31   1 
  11  -9 -10    4.00    3.00   1 
  11   9 -10    1.86    4.19   1 
  11  -9  -9    7.21    3.03   1 
  11   9  -9    8.78    4.20   1 
  11  -9  -8    0.67    2.61   1 
  11   9  -8   -1.88    3.82   1 
  11  -9  -7    3.66    2.79   1 
  11   9  -7    4.58    3.58   1 
  11  -9  -6   36.69    3.85   1 
  11   9  -6   39.54    4.63   1 
  11  -9  -5   20.70    4.11   1 
  11   9  -5   21.01    4.92   1 
  11  -9  -4   49.48    4.46   1 
  11   9  -4   46.15    5.16   1 
  11  -9  -3   20.07    4.10   1 
  11   9  -3   20.40    4.86   1 
  11  -9  -2   36.83    3.97   1 
  11   9  -2   45.81    6.26   1 
  11  -9  -1    4.39    2.81   1 
  11   9  -1    5.52    3.50   1 
  11  -9   0   11.33    3.54   1 
  11   9   0    9.94    4.04   1 
  11  -9   1   -0.04    2.52   1 
  11   9   1    0.80    3.01   1 
  11  -9   2   25.99    4.75   1 
  11   9   2   20.79    4.78   1 
  11  -9   3    4.23    3.07   1 
  11   9   3    4.41    3.77   1 
  11  -9   4   54.05    4.96   1 
  11   9   4   51.51    5.22   1 
  11  -9   5   -0.51    2.87   1 
  11   9   5   -1.48    3.25   1 
  11  -9   6    1.56    3.00   1 
  11   9   6    0.74    3.45   1 
  11  -9   7   -1.63    2.97   1 
  11   9   7    0.38    3.86   1 
  11  -9   8   14.26    4.29   1 
  11   9   8   13.62    4.99   1 
  11  -9   9    2.55    3.76   1 
  11   9   9   -0.10    3.96   1 
  11  -9  10    2.29    3.92   1 
  11   9  10    5.28    4.61   1 
  11  -9  11   -0.40    3.73   1 
  11   9  11    1.10    4.56   1 
  11  -9  12    7.97    4.73   1 
  11   9  12    8.05    5.35   1 
  11  -9  13   -0.45    3.72   1 
  11   9  13   -2.76    4.88   1 
  11  -9  14    2.16    4.33   1 
  11   9  14   -1.99    5.51   1 
  11  10 -13   -3.74    4.69   1 
  11  10 -12   17.54    5.33   1 
  11  10 -11    0.83    4.09   1 
  11 -10 -10    0.49    2.83   1 
  11  10 -10    1.66    4.18   1 
  11 -10  -9    1.46    2.92   1 
  11  10  -9   -1.88    3.85   1 
  11 -10  -8    3.36    2.92   1 
  11  10  -8    0.10    3.94   1 
  11 -10  -7   -0.31    2.75   1 
  11  10  -7   -3.87    3.69   1 
  11 -10  -6    0.94    2.72   1 
  11  10  -6    0.32    3.74   1 
  11 -10  -5    8.98    3.25   1 
  11  10  -5    4.07    3.74   1 
  11 -10  -4    6.35    3.13   1 
  11  10  -4    3.44    3.82   1 
  11 -10  -3    0.30    2.60   1 
  11  10  -3   -1.78    3.30   1 
  11 -10  -2   33.71    3.93   1 
  11  10  -2   49.19    6.94   1 
  11 -10  -1    4.50    2.96   1 
  11  10  -1    3.91    3.83   1 
  11 -10   0   31.07    5.05   1 
  11  10   0   32.11    5.85   1 
  11 -10   1   -1.77    2.77   1 
  11  10   1    0.06    3.29   1 
  11 -10   2   12.62    4.02   1 
  11  10   2    5.27    3.88   1 
  11 -10   3   10.37    3.87   1 
  11  10   3    7.63    4.04   1 
  11 -10   4    3.53    3.32   1 
  11  10   4    4.89    3.98   1 
  11 -10   5   16.58    4.46   1 
  11  10   5   15.61    4.62   1 
  11 -10   6   28.33    5.28   1 
  11  10   6   22.24    5.58   1 
  11 -10   7    0.76    3.24   1 
  11  10   7    1.35    4.14   1 
  11 -10   8    0.85    3.59   1 
  11  10   8    2.44    4.31   1 
  11 -10   9    2.49    3.87   1 
  11  10   9   -0.22    4.07   1 
  11 -10  10    3.31    3.91   1 
  11  10  10    6.45    5.09   1 
  11 -10  11    1.82    4.46   1 
  11  10  11    2.45    4.76   1 
  11 -10  12   -0.49    4.28   1 
  11  10  12    0.15    5.10   1 
  11 -10  13    1.32    4.60   1 
  11  10  13    4.21    5.40   1 
  11  11 -13   16.81    5.98   1 
  11  11 -12    5.73    4.91   1 
  11  11 -11    2.86    4.89   1 
  11 -11 -10    2.42    3.35   1 
  11  11 -10    0.29    4.26   1 
  11 -11  -9   -1.64    2.99   1 
  11  11  -9    0.51    4.14   1 
  11 -11  -8   -0.25    2.84   1 
  11  11  -8    1.58    4.12   1 
  11 -11  -7    0.49    3.06   1 
  11  11  -7    1.68    3.87   1 
  11 -11  -6    0.68    2.93   1 
  11  11  -6    2.58    4.08   1 
  11 -11  -5    0.29    2.96   1 
  11  11  -5   -0.56    3.80   1 
  11 -11  -4    0.35    2.97   1 
  11  11  -4   -0.75    3.74   1 
  11 -11  -3   12.72    4.02   1 
  11  11  -3   10.96    4.38   1 
  11 -11  -2    4.52    3.11   1 
  11  11  -2    0.92    3.35   1 
  11 -11  -1   20.61    4.58   1 
  11  11  -1   15.06    4.97   1 
  11 -11   0    1.21    3.06   1 
  11  11   0   -0.86    3.86   1 
  11 -11   1    8.41    3.66   1 
  11  11   1    9.75    4.68   1 
  11 -11   2    1.63    3.31   1 
  11  11   2   -1.13    3.60   1 
  11 -11   3    3.61    3.50   1 
  11  11   3    3.36    3.96   1 
  11 -11   4    5.40    3.63   1 
  11  11   4    2.40    3.94   1 
  11 -11   5   22.33    5.19   1 
  11  11   5   17.12    5.29   1 
  11 -11   6    1.74    3.93   1 
  11  11   6    0.14    3.75   1 
  11 -11   7   18.71    5.07   1 
  11  11   7   15.43    5.09   1 
  11 -11   8   -1.03    3.93   1 
  11  11   8   -0.60    4.34   1 
  11 -11   9    6.37    4.37   1 
  11  11   9    4.43    4.78   1 
  11 -11  10    4.99    4.86   1 
  11  11  10    0.22    4.77   1 
  11 -11  11   -0.82    4.18   1 
  11  11  11    1.03    5.20   1 
  11 -11  12    0.02    4.75   1 
  11  11  12    0.96    5.57   1 
  11  12 -13   -1.40    5.76   1 
  11  12 -12    3.90    5.69   1 
  11  12 -11   -3.16    4.60   1 
  11 -12 -10   -3.35    3.22   1 
  11  12 -10    0.63    5.04   1 
  11 -12  -9   -0.03    3.38   1 
  11  12  -9    0.89    4.56   1 
  11 -12  -8    0.31    3.55   1 
  11  12  -8   -0.57    4.48   1 
  11 -12  -7    0.70    3.34   1 
  11  12  -7    2.86    4.46   1 
  11 -12  -6   -0.06    3.23   1 
  11  12  -6    0.56    4.24   1 
  11 -12  -5   13.06    4.17   1 
  11  12  -5    6.94    4.67   1 
  11 -12  -4   17.11    4.44   1 
  11  12  -4   17.46    5.78   1 
  11 -12  -3   -1.12    2.88   1 
  11  12  -3    2.77    4.33   1 
  11 -12  -2   -0.62    2.99   1 
  11  12  -2    2.78    3.91   1 
  11 -12  -1    3.84    3.53   1 
  11  12  -1    7.91    4.41   1 
  11 -12   0    2.14    3.45   1 
  11  12   0    3.40    4.11   1 
  11 -12   1    3.18    3.66   1 
  11  12   1    1.74    4.05   1 
  11 -12   2    2.95    3.50   1 
  11  12   2    3.74    4.21   1 
  11 -12   3   16.73    4.79   1 
  11  12   3    9.16    4.85   1 
  11 -12   4    3.06    3.83   1 
  11  12   4    0.70    3.90   1 
  11 -12   5   13.96    4.84   1 
  11  12   5    9.11    4.99   1 
  11 -12   6    1.34    3.85   1 
  11  12   6    0.61    4.48   1 
  11 -12   7    5.10    4.30   1 
  11  12   7    6.90    4.93   1 
  11 -12   8   -0.06    4.23   1 
  11  12   8   -2.17    4.74   1 
  11 -12   9    6.17    4.62   1 
  11  12   9    5.19    5.58   1 
  11 -12  10   -2.11    4.07   1 
  11  12  10   -6.46    4.65   1 
  11 -12  11    1.90    5.37   1 
  11  12  11    5.13    5.79   1 
  11  13 -13   -0.11    5.74   1 
  11  13 -12    2.75    5.62   1 
  11  13 -11    3.64    5.64   1 
  11  13 -10    5.03    5.27   1 
  11 -13  -9   -0.67    3.85   1 
  11  13  -9   -1.85    5.02   1 
  11 -13  -8    0.84    3.70   1 
  11  13  -8   -3.79    4.39   1 
  11 -13  -7    3.15    3.69   1 
  11  13  -7   -0.17    5.03   1 
  11 -13  -6   16.96    4.60   1 
  11  13  -6   11.95    5.34   1 
  11 -13  -5    1.95    3.42   1 
  11  13  -5   -0.77    4.17   1 
  11 -13  -4    3.34    3.59   1 
  11  13  -4   10.33    4.98   1 
  11 -13  -3    0.82    3.32   1 
  11  13  -3   -2.54    4.04   1 
  11 -13  -2    2.43    3.68   1 
  11  13  -2    5.37    4.39   1 
  11 -13  -1    0.61    3.46   1 
  11  13  -1   -1.23    4.35   1 
  11 -13   0    6.30    3.86   1 
  11  13   0    6.04    4.44   1 
  11 -13   1    3.74    3.66   1 
  11  13   1    2.91    4.31   1 
  11 -13   2   12.06    4.52   1 
  11  13   2   11.08    5.02   1 
  11 -13   3   10.99    4.58   1 
  11  13   3    6.45    4.52   1 
  11 -13   4   13.29    4.74   1 
  11  13   4   11.59    4.90   1 
  11 -13   5    4.92    4.32   1 
  11  13   5    2.83    4.58   1 
  11 -13   6   -1.33    3.90   1 
  11  13   6   -0.90    4.40   1 
  11 -13   7    0.32    4.20   1 
  11  13   7    1.58    4.61   1 
  11 -13   8    3.22    4.81   1 
  11  13   8    5.34    4.99   1 
  11 -13   9    0.38    4.69   1 
  11  13   9   -3.96    4.84   1 
  11 -13  10   -2.23    4.82   1 
  11  13  10   -0.83    5.24   1 
  11  14 -12    2.09    6.30   1 
  11  14 -11    0.31    5.84   1 
  11  14 -10   -1.73    5.48   1 
  11 -14  -9   -1.39    4.09   1 
  11  14  -9   -2.25    4.69   1 
  11 -14  -8    9.99    4.55   1 
  11  14  -8    9.36    5.95   1 
  11 -14  -7    5.28    4.27   1 
  11  14  -7    5.59    5.44   1 
  11 -14  -6    2.85    3.99   1 
  11  14  -6   -0.10    4.91   1 
  11 -14  -5    7.72    4.23   1 
  11  14  -5    5.64    5.33   1 
  11 -14  -4   12.16    4.50   1 
  11  14  -4    8.43    5.41   1 
  11 -14  -3   -2.97    3.36   1 
  11  14  -3   -4.19    4.58   1 
  11 -14  -2   13.02    4.45   1 
  11  14  -2    6.36    4.97   1 
  11 -14  -1    2.50    3.65   1 
  11  14  -1    6.06    4.90   1 
  11 -14   0   12.71    4.66   1 
  11  14   0    7.30    4.77   1 
  11 -14   1    2.07    3.85   1 
  11  14   1   -0.23    4.10   1 
  11 -14   2    8.35    4.52   1 
  11  14   2    7.24    5.57   1 
  11 -14   3    3.28    4.33   1 
  11  14   3    2.25    4.93   1 
  11 -14   4    5.86    4.40   1 
  11  14   4    5.14    5.02   1 
  11 -14   5    0.53    4.13   1 
  11  14   5    0.92    4.74   1 
  11 -14   6    4.72    4.85   1 
  11  14   6    6.05    4.90   1 
  11 -14   7   -0.37    5.32   1 
  11  14   7    1.55    4.95   1 
  11 -14   8    2.65    4.87   1 
  11  14   8    3.29    5.13   1 
  11  15 -10    3.99    6.15   1 
  11 -15  -9    0.16    4.66   1 
  11  15  -9   -0.40    5.72   1 
  11 -15  -8    1.38    4.38   1 
  11  15  -8    0.40    5.56   1 
  11 -15  -7   -3.57    4.04   1 
  11  15  -7    1.33    5.29   1 
  11 -15  -6    9.86    4.85   1 
  11  15  -6    7.16    5.67   1 
  11 -15  -5    1.57    4.18   1 
  11  15  -5    1.10    4.93   1 
  11 -15  -4    5.92    4.48   1 
  11  15  -4    1.70    5.30   1 
  11 -15  -3    9.54    4.64   1 
  11  15  -3    9.64    5.67   1 
  11 -15  -2    4.76    4.16   1 
  11  15  -2   -0.65    4.56   1 
  11 -15  -1    1.32    4.10   1
[truncated: 1,222,846 more chars]
